# Supplementary material for: Identification of lncRNAs Deregulated in Epithelial Ovarian Cancer Based on a Gene Expression Profiling Meta-Analysis
Source: MDPI journal article supplement (doi:10.3390/ijms241310798), 2023-06-28

**Supplementary Figure S1.-** Expression in other tissues of the two potential tumor suppressors identified in the meta-analysis . Information is provided from GEPIA, which compares TCGA (tumor) information and GTEx (normal). The upper bar graph corresponds to *NR2F2-AS1* and the lower to *RPH3AL-AS1*. TPM, transcripts per million.

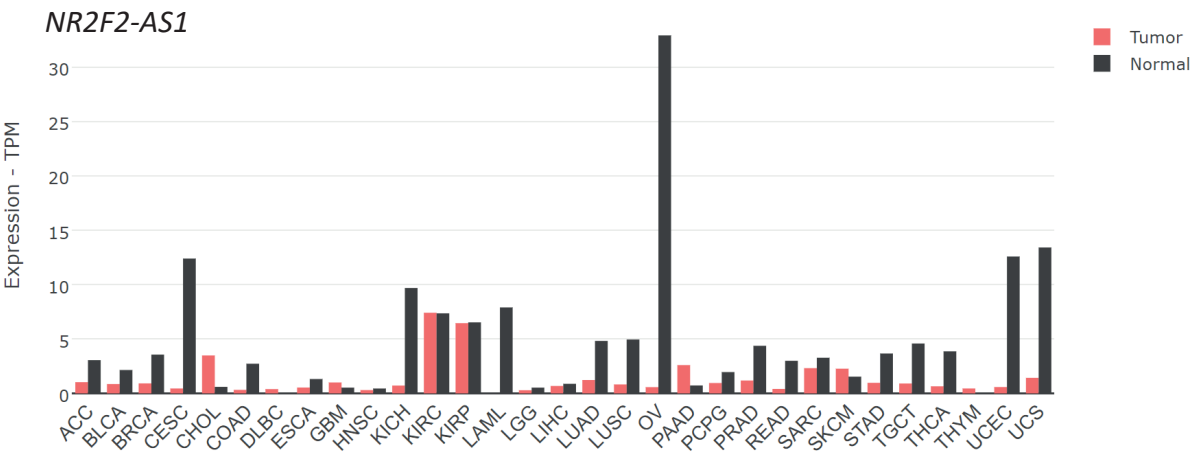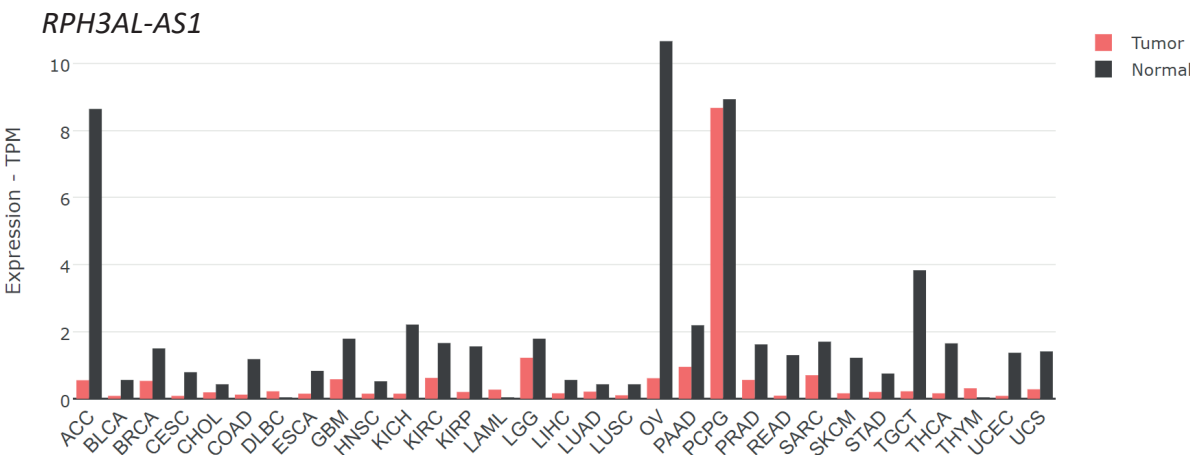

Supplement: s1 [file s1]
