# Supplementary material for: Identification of lncRNAs Deregulated in Epithelial Ovarian Cancer Based on a Gene Expression Profiling Meta-Analysis
Source: Int J Mol Sci. 2023 Jun 28;24(13):10798. doi: 10.3390/ijms241310798 (PMC10341812; doi:10.3390/ijms241310798)
Supplement: Supplementary file 1 [file ijms-24-10798-s001.zip]

Archive with 13 entries (13 files):
- Supplementary Figure S1.pdf
- Supplementary Table S1.xlsx
- Supplementary Table S10.xlsx
- Supplementary Table S11.xlsx
- Supplementary Table S12.xlsx
- Supplementary Table S2.xlsx
- Supplementary Table S3.xlsx
- Supplementary Table S4.xlsx
- Supplementary Table S5.xlsx
- Supplementary Table S6.xlsx
- Supplementary Table S7.xlsx
- Supplementary Table S8.xlsx
- Supplementary Table S9.xlsx
