# Supplementary material for: Identification of lncRNAs Deregulated in Epithelial Ovarian Cancer Based on a Gene Expression Profiling Meta-Analysis
Source: Int J Mol Sci. 2023 Jun 28;24(13):10798. doi: 10.3390/ijms241310798 (PMC10341812; doi:10.3390/ijms241310798)
Supplement: Supplementary file 1 [file ijms-24-10798-s001.zip › Supplementary Table S1.xlsx]

## Sheet: STS1 Title
		Supplementary Table S1.- Gene expression profiling studies from EOC found in the initial search.

## Sheet: STS1
Series	Technology	Platform	Type of Sample	Type of OC	Histological subtype(s)	# cancer samples (P|A|M or R|S)	# normal samples	Matched	Survival and progression follow-up
GSE29450	Microarray	Affymetrix Human Genome U133 Plus 2.0 Array	Tissue	Epithelial	CCOC	10	10	No
GSE26193	Microarray	Affymetrix Human Genome U133 Plus 2.0 Array	Tissue	Epithelial	CCOC (n=6), ENOC (n=8), MOC (n=8), SOC (n=79), and unknown (n=3)	104	0	NA	Yes
GSE19539	Microarray	Affymetrix Human Gene 1.0 ST Array	Tissue	Epithelial	CCOC (n=9), ENOC (n=14), MOC (n=7), and SOC (n=37)	67	0	No
GSE6008	Microarray	Affymetrix Human Genome U133 Plus Array	Tissue	Epithelial	ENOC (n=37), SOC (n=41), MOC (n=13), and CCOC (n=8)	99	4	No
GSE18520	Microarray	Affymetrix Human Genome U133 Plus 2.0 Array	Tissue	Epithelial	HG	53	10	No	Yes
GSE26712	Microarray	Affymetrix Human Genome U133A Array	Tissue	Epithelial	HG	185	10	No	Yes
GSE83693	Microarray	Agilent-031181 Unrestricted_Human_miRNA_V16.0_Microarray	Tissue	Epithelial	HG	(8 recurrent + 8 primary)	4	No
E-MTAB-4667	Microarray	Agilent Human 8x60k MicroRNA Array	Blood serum	Epithelial	HGSOC	106	24	No
GSE10971	Microarray	Affymetrix Human Genome U133 Plus 2.0 Array	Tissue	Epithelial	HGSOC	13	24	No
GSE32062	Microarray	Affymetrix Human Genome U133 Plus 2.0 Array + Agilent Whole Human Genome Microarray 4x44K G4112F	Tissue	Epithelial	HGSOC	270	0	No	Yes
GSE40595	Microarray	Affymetrix Human Genome U133 Plus 2.0 Array	Tissue	Epithelial and stromal	HGSOC	32	6	No
GSE51373	Microarray	Affymetrix Human Genome U133 Plus 2.0 Array	Tissue	Epithelial	HGSOC	12|16	0	No
GSE73064	Microarray	Affymetrix Human Genome U133 Plus 2.0 Array	Tissue	Epithelial	HGSOC	5|5|5	0	Yes
GSE14001	Microarray	Affymetrix Human Genome U133 Plus 2.0 Array	Tissue	Epithelial	HGSOC (n=10) and LGSOC (n=10)	20	3	No
GSE27651	Microarray	Affymetrix Human Genome U133 Plus 2.0 Array	Tissue	Epithelial	HGSOC (n=22) and LGSOC (n=13)	35	6	No
GSE73091	Microarray	Affymetrix Human Genome U133 Plus 2.0 Array	Tissue	Epithelial	LGSOC	5|5|5	0	Yes
GSE14407	Microarray	Affymetrix Human Genome U133 Plus 2.0 Array	Tissue	Epithelial	SOC	12	12	No
Wang, 2016	Microarray	Arraystar Human lncRNA Microarray V3.0	Tissue	Epithelial	SOC	3	3	No
GSE51088	Microarray	Agilent Human 1A Microarray (V2) G4110B (Probe Name version)	Tissue	Epithelial	SOC (n=122) and others (n=30)	172	0	No
GSE63885	Microarray	Affymetrix Human Genome U133 Plus 2.0 Array	Tissue	Epithelial	SOC (n=73), ENOC (n=12), CCOC (n= 9), and undifferentiated (n=7)	101	0	NA	Yes
GSE103708	Microarray	Agilent-046064 Unrestricted_Human_miRNA_V19.0_Microarray	Cell lines and exosomes (A2780, ES-2, CAOV3, SKOV3, OV-90, OAW42, MCAS, COV362, RMG-1, RMUG-S, KURAMOCHI, NIH-OVCAR3, A2780cis, HOSE1, HOSE2, and HOSE3)	Epithelial		NA	NA	NA
GSE104776	Microarray	Arraystar Human LncRNA microarray V4	Cell lines (SKOV3 and IOSE80)	Epithelial		NA	NA	NA
GSE119054	Microarray	Agilent-067406 CBC lncRNA + mRNA microarray V4.0	Tissue	Epithelial		6	3	No
GSE122123	Microarray	Agilent-074348 Human LncRNA v6 4X180K	Cell lines (OVCAR-3)	Epithelial		NA	NA	NA
GSE122147	Microarray	Agilent-074348 Human LncRNA v6 4X180K	Cell lines (SKOV3)	Epithelial		NA	NA	NA
GSE17260	Microarray	Agilent Whole Human Genome Microarray 4x44K G4112F	Tissue	Epithelial		110	0	NA	Yes
GSE17308	Microarray	PC Human Operon 21k v2	Tissue	Epithelial		28	4	No
GSE19829	Microarray	Affymetrix Human Genome U133 Plus 2.0 Array + Affymetrix Human Genome U95 Version 2 Array	Tissue	Epithelial		61	0	NA	Yes
GSE23383	Microarray	Ambion 14K miRChip V1	Tissue	Epithelial		3	3	No
GSE23391	Microarray	Affymetrix Human Genome U133 Plus 2.0 Array	Tissue	Epithelial		3	4	No
GSE29220	Microarray	Affymetrix Human Genome U133 Plus 2.0 Array	Saliva	Epithelial		11	11	No
GSE30161	Microarray	Affymetrix Human Genome U133 Plus 2.0 Array	Tissue	Epithelial		58	0	NA	Yes
GSE30587	Microarray	Affymetrix Human Gene 1.0 ST Array	Tissue	Epithelial		9|0|9	0	Yes
GSE31245	Microarray	Affymetrix Human Genome U95 Version 2 Array	Tissue	Epithelial		57	0	No	Yes
GSE31568	Microarray	febit Homo Sapiens miRBase 13.0	Blood	Epithelial		16	70	No
GSE35951	Microarray	Exiqon MiRCURY Locked Nucleic Acid array [miRBase 8.2]	Cell lines (HOSE, OV167, OV202, OVCAR-3, and PEO1)	Epithelial		NA	NA	NA
GSE38666	Microarray	Affymetrix Human Genome U133 Plus 2.0 Array	Tissue	Epithelial and stromal		18	12	No
GSE48485	Microarray	Agilent-029297 Human miRNA Microarray	Blood serum	Epithelial		5	5	No
GSE49997	Microarray	ABI Human Genome Survey Microarray Version 2	Tissue	Epithelial		204	0	NA	Yes
GSE52037	Microarray	Affymetrix Human Genome U133 Plus 2.0 Array	Tissue	Epithelial		10	10	No
GSE52210	Microarray	Affymetrix Human Gene 1.0 ST Array	Cell lines (A2780)	Epithelial		NA	NA	NA
GSE53829	Microarray	Biovue's Human Sharpvue miRNA Primer Array Panels	Tissue	Epithelial		48	15	No
GSE54388	Microarray	Affymetrix Human Genome U133 Plus 2.0 Array	Tissue	Epithelial		16	6	No
GSE58517	Microarray	Agilent-046064 Unrestricted_Human_miRNA_V19.0_Microarray	Urine	Epithelial		5	5	No
GSE61741	Microarray	febit Homo Sapiens miRBase 13.0	Blood	Epithelial		24	94	No
GSE66957	Microarray	Rosetta/Merck Human RSTA Custom Affymetrix 2.0 microarray	Tissue	Epithelial		57	12	No
GSE67329	Microarray	Illumina Human v2 MicroRNA expression beadchip	Cell lines (PEO1, PEO4, and HOSE)	Epithelial		NA	NA	NA
GSE74448	Microarray	Agilent-021441 NCode Human Long Non-coding RNA microarray	Tissue	Epithelial		29	11	No
GSE76449	Microarray	Affymetrix Multispecies miRNA-4 Array	Cell lines and exosomes (H10180, SKOV3, HEYA8, and A2780)	Epithelial		NA	NA	NA
GSE9890	Microarray	Affymetrix Human Genome U133 Plus 2.0 Array	Tissue	Epithelial (n=5) and stromal (n=5)		10	0	NA
GSE9891	Microarray	Affymetrix Human Genome U133 Plus 2.0 Array	Tissue	Epithelial		285	0	NA
GSE189553	RNA-Seq	Illumina HiSeq 2500	Tissue	Epithelial	CCOC (n=11), HGSOC (n=8), and ENOC (n=4)	23	0	No
GSE121103	RNA-Seq	Illumina NextSeq 500	Tissue	Epithelial	CCOC (n=5), ENOC (n=4), HGSOC (n=5), and MOC (n=5)	19	0	No
EGAD00001000877	RNA-Seq	Illumina HiSeq 2000	Tissue	Epithelial	HGSOC	92	7	No
GSE115573	RNA-Seq	Illumina Genome Analyzer IIx	Tissue	Epithelial	HGSOC	3|3|3	0	Yes
GSE137237	RNA-Seq	Illumina NextSeq 500	Tissue	Epithelial	HGSOC	11|0|11	0	Yes
GSE190688	RNA-Seq	Illumina HiSeq 2000	Tissue	Epithelial	HGSOC	6	5	No
GSE98281	RNA-Seq	Illumina HiSeq 2000	Tissue	Epithelial	HGSOC	10|0|10	0	Yes
GEPIA2	RNA-Seq	Unknown	Tissue	Epithelial		426	88	No	Yes
GSE118216	RNA-Seq	Ion Torrent PGM	Cell lines (SKOV3)	Epithelial		NA	NA	NA
GSE133296	RNA-Seq	Illumina HiSeq X Ten	Tissue	Epithelial		10|0|20 (10+10)	0	Yes
GSE137238	RNA-Seq	Illumina NextSeq 500	Tissue	Epithelial		8	8	Yes
GSE192410	RNA-Seq	Illumina HiSeq 2000 (only circRNA)	Tissue	Epithelial		3	3	Yes

## Sheet: Legend
P	Primary tumor
A	Ascites/Effusion tumor cells
M	Peritoneal solid metastasis
R	Resistant
S	Sensitive
HGSOC	High-grade serous ovarian carcinoma
LGSOC	Low-grade seroues ovarian carcinoma
SOC	Seros ovarian carcinoma
CCOC	Clear cell ovarian carcinoma
MOC	Mucinous ovarian carcinoma
ENOC	Endometrioid ovarian carcinoma
HG	High-grade
