# Supplementary material for: Identification of lncRNAs Deregulated in Epithelial Ovarian Cancer Based on a Gene Expression Profiling Meta-Analysis
Source: Int J Mol Sci. 2023 Jun 28;24(13):10798. doi: 10.3390/ijms241310798 (PMC10341812; doi:10.3390/ijms241310798)
Supplement: Supplementary file 1 [file ijms-24-10798-s001.zip › Supplementary Table S2.xlsx]

## Sheet: STS2 Title
	Supplementary Table S2.- List of studies used in the “Diagnostic” meta analysis with study information (sheet 2) and results from the individual analyses (succesive sheets).

## Sheet: STS2 Study information
Series	Country	Year	Platform	Sample source	Subtype	EOC samples	Normal samples	Matched	Reference
GSE10971	Canada	2008	Affymetrix Human Genome U133 Plus 2.0 Array	Tissue	High-grade serous	13	24	No	[120]
GSE14001	USA	2009	Affymetrix Human Genome U133 Plus 2.0 Array	Tissue	High-and low-grade serous	20	3	No	[121]
GSE14407	USA	2009	Affymetrix Human Genome U133 Plus 2.0 Array	Tissue	Serous	12	12	No	[122]
GSE18520	USA	2009	Affymetrix Human Genome U133 Plus 2.0 Array	Tissue	High-grade serous	53	12	No	[123]
GSE26712	USA	2008	Affymetrix Human Genome U133A Array	Tissue	-	185	10	No	[124]
GSE29450	USA	2011	Affymetrix Human Genome U133 Plus 2.0 Array	Tissue	Clear cell	10	10	No	[125]
GSE38666	USA	2012	Affymetrix Human Genome U133 Plus 2.0 Array	Tissue	-	18	12	No	[126]
GSE40595	USA	2012	Affymetrix Human Genome U133 Plus 2.0 Array	Tissue	High-grade serous	32	6	No	[127]
GSE52037	USA	2013	Affymetrix Human Genome U133 Plus 2.0 Array	Tissue	Serous	10	10	No	[128]
GSE54388	USA	2014	Affymetrix Human Genome U133 Plus 2.0 Array	Tissue	High-grade serous	16	6	No	[129]
GSE66957	USA	2015	Rosetta/Merck Human RSTA Custom Affymetrix 2.0 microarray	Tissue	-	57	12	No	-
GSE119054	China	2018	Agilent-067406 CBC lncRNA + mRNA microarray V4.0	Tissue	-	36	14	No	[130]
GSE137238	USA	2019	Illumina NextSeq 500	Tissue	-	8		Yes	[131]
GEPIA2	-	-	RNA-Seq	Tissue	-	428	88	No	[115]
GSE23391	USA	2010	Affymetrix Human Genome U133 Plus 2.0 Array	Tissue	-	3	5	No	[132]
GSE27651	USA	2011	Affymetrix Human Genome U133 Plus 2.0 Array	Tissue	High-and low-grade serous	35	6	No	[133]
-	China	2016	Arraystar Human lncRNA Microarray V3.0	Tissue	Serous	3	3	No	[20]
GSE74448	USA	2015	Agilent-021441 NCode Human Long Non-coding RNA microarray	Tissue	-	29	11	No	[134]
GSE6008	USA	2006	Affymetrix Human Genome U133A Array	Tissue	Endometrioid, serous, mucinous, and clear cell	99	4	No	[135]
GSE29220	USA	2011	Affymetrix Human Genome U133 Plus 2.0 Array	Saliva	-	11	11	No	[136]
GSE17308	Australia	2009	PC Human Operon 21k v2	Tissue	-	28	4	No	[137]
GSE190688	China	2021	Illumina HiSeq 2000	Tissue	High-grade serous	6	5	No	[138]

## Sheet: GSE10971
Parametric p-value	FDR	Normal	Cancer	Fold-change cancer vs normal	ProbeSet	Gene_name	Gene_ID	Gene_description	Chromosome_scaffold_name	Gene_start_bp	Gene_end_bp	Strand	Karyotype_band	Gene_GC_content	Gene_type	Gene_Length
< 1e-07	< 1e-07	21.81	77	3.53049	220840_s_at	C1orf112	ENSG00000000460	chromosome 1 open reading frame 112 [Source:HGNC Symbol;Acc:HGNC:25565]	chr1	169662007	169854080	1	q24.2	39.22	protein_coding	5970
0.0031204	0.00963	15.24	43.08	2.82677	213800_at	CFH	ENSG00000000971	complement factor H [Source:HGNC Symbol;Acc:HGNC:4883]	chr1	196652043	196747504	1	q31.3	35.19	protein_coding	7980
3.99e-05	0.00025	25.62	10.07	0.393052	227694_at	STPG1	ENSG00000001460	sperm tail PG-rich repeat containing 1 [Source:HGNC Symbol;Acc:HGNC:28070]	chr1	24356999	24416934	-1	p36.11	44.09	protein_coding	8511
0.0008469	0.00327	507.51	314.71	0.620106	225876_at	NIPAL3	ENSG00000001461	NIPA like domain containing 3 [Source:HGNC Symbol;Acc:HGNC:25233]	chr1	24415802	24472976	1	p36.11	44.99	protein_coding	9396
1.3e-06	1.45e-05	137.76	273.4	1.98461	212175_s_at	AK2	ENSG00000004455	adenylate kinase 2 [Source:HGNC Symbol;Acc:HGNC:362]	chr1	33007940	33080996	-1	p35.1	46.32	protein_coding	9625
2.43e-05	0.000167	35.28	92.95	2.63464	205996_s_at	AK2	ENSG00000004455	adenylate kinase 2 [Source:HGNC Symbol;Acc:HGNC:362]	chr1	33007940	33080996	-1	p35.1	46.32	protein_coding	9625
7.19e-05	0.000412	139.31	55.15	0.39588	219964_at	ST7L	ENSG00000007341	suppression of tumorigenicity 7 like [Source:HGNC Symbol;Acc:HGNC:18441]	chr1	112523514	112620825	-1	p13.2	39.05	protein_coding	8108
3.24e-05	0.000212	21.16	35.6	1.68242	215792_s_at	DNAJC11	ENSG00000007923	DnaJ heat shock protein family (Hsp40) member C11 [Source:HGNC Symbol;Acc:HGNC:25570]	chr1	6634168	6701924	-1	p36.31	46.6	protein_coding	5083
0.0015416	0.00535	31.57	49.97	1.58283	1555360_a_at	DNAJC11	ENSG00000007923	DnaJ heat shock protein family (Hsp40) member C11 [Source:HGNC Symbol;Acc:HGNC:25570]	chr1	6634168	6701924	-1	p36.31	46.6	protein_coding	5083
< 1e-07	< 1e-07	9.1	97.62	10.7275	228361_at	E2F2	ENSG00000007968	E2F transcription factor 2 [Source:HGNC Symbol;Acc:HGNC:3114]	chr1	23506438	23531233	-1	p36.12	51.65	protein_coding	5462
5.2e-06	4.55e-05	739.1	1221.44	1.6526	208919_s_at	NADK	ENSG00000008130	NAD kinase [Source:HGNC Symbol;Acc:HGNC:29831]	chr1	1751232	1780457	-1	p36.33	53.7	protein_coding	5570
4.17e-05	0.00026	1084.28	1827.99	1.6859	208918_s_at	NADK	ENSG00000008130	NAD kinase [Source:HGNC Symbol;Acc:HGNC:29831]	chr1	1751232	1780457	-1	p36.33	53.7	protein_coding	5570
0.0001505	0.000769	8	12.87	1.60875	213613_s_at	NADK	ENSG00000008130	NAD kinase [Source:HGNC Symbol;Acc:HGNC:29831]	chr1	1751232	1780457	-1	p36.33	53.7	protein_coding	5570
0.0003965	0.00174	8.16	14.33	1.75613	213607_x_at	NADK	ENSG00000008130	NAD kinase [Source:HGNC Symbol;Acc:HGNC:29831]	chr1	1751232	1780457	-1	p36.33	53.7	protein_coding	5570
0.001092	0.00402	232.64	388.53	1.67009	222975_s_at	CSDE1	ENSG00000009307	cold shock domain containing E1 [Source:HGNC Symbol;Acc:HGNC:29905]	chr1	114716913	114758676	-1	p13.2	38.28	protein_coding	5778
0.0001608	0.000814	26.69	15.71	0.58861	228604_at	FAM76A	ENSG00000009780	family with sequence similarity 76 member A [Source:HGNC Symbol;Acc:HGNC:28530]	chr1	27725961	27763116	1	p35.3	43.38	protein_coding	4046
0.0027606	0.00871	7.28	11.24	1.54396	213888_s_at	TRAF3IP3	ENSG00000009790	TRAF3 interacting protein 3 [Source:HGNC Symbol;Acc:HGNC:30766]	chr1	209756032	209782320	1	q32.2	45.61	protein_coding	7750
0.0004007	0.00175	19.58	29.01	1.48161	206468_s_at	EEF1AKNMT	ENSG00000010165	eEF1A lysine and N-terminal methyltransferase [Source:HGNC Symbol;Acc:HGNC:24248]	chr1	171781660	171814023	1	q24.3	43.61	protein_coding	3831
0.0092149	0.0236	44.51	74.13	1.66547	212405_s_at	EEF1AKNMT	ENSG00000010165	eEF1A lysine and N-terminal methyltransferase [Source:HGNC Symbol;Acc:HGNC:24248]	chr1	171781660	171814023	1	q24.3	43.61	protein_coding	3831
0.0062006	0.0171	19.35	8.47	0.437726	203296_s_at	ATP1A2	ENSG00000018625	ATPase Na+/K+ transporting subunit alpha 2 [Source:HGNC Symbol;Acc:HGNC:800]	chr1	160115759	160143591	1	q23.2	50.38	protein_coding	6298
0.0002156	0.00104	5.89	9.88	1.67742	204198_s_at	RUNX3	ENSG00000020633	RUNX family transcription factor 3 [Source:HGNC Symbol;Acc:HGNC:10473]	chr1	24899511	24965121	-1	p36.11	54.8	protein_coding	4922
0.0034402	0.0104	8.3	14.67	1.76747	204197_s_at	RUNX3	ENSG00000020633	RUNX family transcription factor 3 [Source:HGNC Symbol;Acc:HGNC:10473]	chr1	24899511	24965121	-1	p36.11	54.8	protein_coding	4922
1.3e-06	1.45e-05	63.78	164.8	2.58388	219933_at	GLRX2	ENSG00000023572	glutaredoxin 2 [Source:HGNC Symbol;Acc:HGNC:16065]	chr1	193090866	193106114	-1	q31.2	39.59	protein_coding	6210
1.3e-06	1.45e-05	7	21.09	3.01286	220295_x_at	DEPDC1	ENSG00000024526	DEP domain containing 1 [Source:HGNC Symbol;Acc:HGNC:22949]	chr1	68474152	68497221	-1	p31.3	34.94	protein_coding	5904
4.9e-06	4.34e-05	5.29	13.35	2.52363	235545_at	DEPDC1	ENSG00000024526	DEP domain containing 1 [Source:HGNC Symbol;Acc:HGNC:22949]	chr1	68474152	68497221	-1	p31.3	34.94	protein_coding	5904
< 1e-07	< 1e-07	6.67	113.05	16.949	222958_s_at	DEPDC1	ENSG00000024526	DEP domain containing 1 [Source:HGNC Symbol;Acc:HGNC:22949]	chr1	68474152	68497221	-1	p31.3	34.94	protein_coding	5904
0.003006	0.00933	10.8	15.71	1.45463	212102_s_at	KPNA6	ENSG00000025800	karyopherin subunit alpha 6 [Source:HGNC Symbol;Acc:HGNC:6399]	chr1	32108056	32176563	1	p35.2	44.21	protein_coding	7457
0.0003632	0.00161	9.85	35.97	3.65178	222838_at	SLAMF7	ENSG00000026751	SLAM family member 7 [Source:HGNC Symbol;Acc:HGNC:21394]	chr1	160739057	160754821	1	q23.3	43.99	protein_coding	4833
0.0014649	0.00514	307.18	476.86	1.55238	221761_at	ADSS2	ENSG00000035687	adenylosuccinate synthase 2 [Source:HGNC Symbol;Acc:HGNC:292]	chr1	244408494	244451909	-1	q44	38.09	protein_coding	3441
0.0030007	0.00932	26.89	47.48	1.76571	212893_at	ZZZ3	ENSG00000036549	zinc finger ZZ-type containing 3 [Source:HGNC Symbol;Acc:HGNC:24523]	chr1	77562416	77683419	-1	p31.1	37.17	protein_coding	9008
0.0008778	0.00336	11.74	19.15	1.63118	1555783_x_at	SLC66A1	ENSG00000040487	solute carrier family 66 member 1 [Source:HGNC Symbol;Acc:HGNC:26001]	chr1	19312326	19329300	1	p36.13	54.93	protein_coding	2686
1.1e-06	1.27e-05	310.97	533.15	1.71447	201731_s_at	TPR	ENSG00000047410	translocated promoter region, nuclear basket protein [Source:HGNC Symbol;Acc:HGNC:12017]	chr1	186311652	186375693	-1	q31.1	34.16	protein_coding	12350
0.0013192	0.0047	99.34	56.6	0.56976	220221_at	VPS13D	ENSG00000048707	vacuolar protein sorting 13 homolog D [Source:HGNC Symbol;Acc:HGNC:23595]	chr1	12230030	12512047	1	p36.22	42.34	protein_coding	20768
5.99e-05	0.000353	9.52	36.1	3.79202	213622_at	COL9A2	ENSG00000049089	collagen type IX alpha 2 chain [Source:HGNC Symbol;Acc:HGNC:2218]	chr1	40300489	40317813	-1	p34.2	57.43	protein_coding	4215
1.63e-05	0.00012	10.05	28.21	2.80697	201337_s_at	VAMP3	ENSG00000049245	vesicle associated membrane protein 3 [Source:HGNC Symbol;Acc:HGNC:12644]	chr1	7771296	7781432	1	p36.23	42.69	protein_coding	2733
4.24e-05	0.000264	5.43	11.6	2.13628	207536_s_at	TNFRSF9	ENSG00000049249	TNF receptor superfamily member 9 [Source:HGNC Symbol;Acc:HGNC:11924]	chr1	7915871	7943165	-1	p36.23	43.92	protein_coding	6354
< 1e-07	1.6e-06	83.12	197.6	2.37729	228026_at	SIKE1	ENSG00000052723	suppressor of IKBKE 1 [Source:HGNC Symbol;Acc:HGNC:26119]	chr1	114769479	114780685	-1	p13.2	36.9	protein_coding	5894
1.71e-05	0.000125	7.35	13.65	1.85714	204665_at	SIKE1	ENSG00000052723	suppressor of IKBKE 1 [Source:HGNC Symbol;Acc:HGNC:26119]	chr1	114769479	114780685	-1	p13.2	36.9	protein_coding	5894
0.005784	0.0161	10.12	19.76	1.95257	235294_at	SIKE1	ENSG00000052723	suppressor of IKBKE 1 [Source:HGNC Symbol;Acc:HGNC:26119]	chr1	114769479	114780685	-1	p13.2	36.9	protein_coding	5894
0.0047041	0.0135	17.73	29.39	1.65764	220688_s_at	MRTO4	ENSG00000053372	MRT4 homolog, ribosome maturation factor [Source:HGNC Symbol;Acc:HGNC:18477]	chr1	19251805	19260128	1	p36.13	52.85	protein_coding	2556
< 1e-07	< 1e-07	26.56	92.72	3.49096	203511_s_at	TRAPPC3	ENSG00000054116	trafficking protein particle complex 3 [Source:HGNC Symbol;Acc:HGNC:19942]	chr1	36136570	36156053	-1	p34.3	49.8	protein_coding	3527
0.00266	0.00844	70.63	39.82	0.563783	1554237_at	SDCCAG8	ENSG00000054282	SHH signaling and ciliogenesis regulator SDCCAG8 [Source:HGNC Symbol;Acc:HGNC:10671]	chr1	243256034	243500091	1	q43	39.81	protein_coding	5321
4.14e-05	0.000258	89.97	32.91	0.365789	219687_at	HHAT	ENSG00000054392	hedgehog acyltransferase [Source:HGNC Symbol;Acc:HGNC:18270]	chr1	210328252	210676296	1	q32.2	42.26	protein_coding	6645
4.96e-05	0.0003	33.66	110.97	3.29679	225878_at	KIF1B	ENSG00000054523	kinesin family member 1B [Source:HGNC Symbol;Acc:HGNC:16636]	chr1	10210570	10381603	1	p36.22	42.04	protein_coding	17955
0.0045564	0.0132	223.28	368.16	1.64887	226968_at	KIF1B	ENSG00000054523	kinesin family member 1B [Source:HGNC Symbol;Acc:HGNC:16636]	chr1	10210570	10381603	1	p36.22	42.04	protein_coding	17955
0.0005265	0.00219	59.35	110.36	1.85948	212002_at	SZRD1	ENSG00000055070	SUZ RNA binding domain containing 1 [Source:HGNC Symbol;Acc:HGNC:30232]	chr1	16352575	16398145	1	p36.13	48.1	protein_coding	4742
0.0013338	0.00474	9.16	15.48	1.68996	212003_at	SZRD1	ENSG00000055070	SUZ RNA binding domain containing 1 [Source:HGNC Symbol;Acc:HGNC:30232]	chr1	16352575	16398145	1	p36.13	48.1	protein_coding	4742
0.0021828	0.00716	415.82	613.55	1.47552	212005_at	SZRD1	ENSG00000055070	SUZ RNA binding domain containing 1 [Source:HGNC Symbol;Acc:HGNC:30232]	chr1	16352575	16398145	1	p36.13	48.1	protein_coding	4742
0.0047422	0.0136	129.63	245.64	1.89493	212004_at	SZRD1	ENSG00000055070	SUZ RNA binding domain containing 1 [Source:HGNC Symbol;Acc:HGNC:30232]	chr1	16352575	16398145	1	p36.13	48.1	protein_coding	4742
< 1e-07	1.6e-06	1102.76	345.65	0.313441	228479_at	SOAT1	ENSG00000057252	sterol O-acyltransferase 1 [Source:HGNC Symbol;Acc:HGNC:11177]	chr1	179293714	179358680	1	q25.2	39.63	protein_coding	7005
2.17e-05	0.000151	381.24	133.08	0.349071	244661_at	SOAT1	ENSG00000057252	sterol O-acyltransferase 1 [Source:HGNC Symbol;Acc:HGNC:11177]	chr1	179293714	179358680	1	q25.2	39.63	protein_coding	7005
0.0003539	0.00158	12.75	21.14	1.65804	229856_s_at	PITHD1	ENSG00000057757	PITH domain containing 1 [Source:HGNC Symbol;Acc:HGNC:25022]	chr1	23778418	23788232	1	p36.11	44.53	protein_coding	2173
3.79e-05	0.000241	230.8	99.22	0.429896	202267_at	LAMC2	ENSG00000058085	laminin subunit gamma 2 [Source:HGNC Symbol;Acc:HGNC:6493]	chr1	183186238	183245127	1	q25.3	43.26	protein_coding	6770
1e-07	1.6e-06	35.3	13.12	0.371671	206274_s_at	CROCC	ENSG00000058453	ciliary rootlet coiled-coil, rootletin [Source:HGNC Symbol;Acc:HGNC:21299]	chr1	16740273	16972964	1	p36.13	49.14	protein_coding	8875
0.0054607	0.0153	69.1	124.77	1.80564	212135_s_at	ATP2B4	ENSG00000058668	ATPase plasma membrane Ca2+ transporting 4 [Source:HGNC Symbol;Acc:HGNC:817]	chr1	203626787	203744081	1	q32.1	46.48	protein_coding	9495
0.0068037	0.0184	103.99	169.27	1.62775	212136_at	ATP2B4	ENSG00000058668	ATPase plasma membrane Ca2+ transporting 4 [Source:HGNC Symbol;Acc:HGNC:817]	chr1	203626787	203744081	1	q32.1	46.48	protein_coding	9495
3.72e-05	0.000237	22.65	72.58	3.20442	218073_s_at	NDC1	ENSG00000058804	NDC1 transmembrane nucleoporin [Source:HGNC Symbol;Acc:HGNC:25525]	chr1	53765478	53838463	-1	p32.3	40.2	protein_coding	4720
0.0002197	0.00106	192.55	497.1	2.58167	234672_s_at	NDC1	ENSG00000058804	NDC1 transmembrane nucleoporin [Source:HGNC Symbol;Acc:HGNC:25525]	chr1	53765478	53838463	-1	p32.3	40.2	protein_coding	4720
0.0021957	0.0072	44.57	68.56	1.53825	223331_s_at	DDX20	ENSG00000064703	DEAD-box helicase 20 [Source:HGNC Symbol;Acc:HGNC:2743]	chr1	111754832	111775602	1	p13.2	40.27	protein_coding	8778
2e-07	2.96e-06	198.76	430.78	2.16734	201180_s_at	GNAI3	ENSG00000065135	G protein subunit alpha i3 [Source:HGNC Symbol;Acc:HGNC:4387]	chr1	109548615	109600195	1	p13.3	38.65	protein_coding	9044
1.4e-06	1.54e-05	14.09	28.31	2.00923	201179_s_at	GNAI3	ENSG00000065135	G protein subunit alpha i3 [Source:HGNC Symbol;Acc:HGNC:4387]	chr1	109548615	109600195	1	p13.3	38.65	protein_coding	9044
8.84e-05	0.000489	16.37	28.76	1.75687	201181_at	GNAI3	ENSG00000065135	G protein subunit alpha i3 [Source:HGNC Symbol;Acc:HGNC:4387]	chr1	109548615	109600195	1	p13.3	38.65	protein_coding	9044
2.11e-05	0.000148	901.77	1370.31	1.51958	218882_s_at	WDR3	ENSG00000065183	WD repeat domain 3 [Source:HGNC Symbol;Acc:HGNC:12755]	chr1	117929720	117966543	1	p12	36.95	protein_coding	10276
3.01e-05	0.000199	13.11	6.35	0.484363	1557593_at	WDR3	ENSG00000065183	WD repeat domain 3 [Source:HGNC Symbol;Acc:HGNC:12755]	chr1	117929720	117966543	1	p12	36.95	protein_coding	10276
0.0044929	0.013	412.34	204	0.494737	212629_s_at	PKN2	ENSG00000065243	protein kinase N2 [Source:HGNC Symbol;Acc:HGNC:9406]	chr1	88684222	88836255	1	p22.2	36.25	protein_coding	6897
4.3e-06	3.9e-05	69.98	288.41	4.12132	222752_s_at	PACC1	ENSG00000065600	proton activated chloride channel 1 [Source:HGNC Symbol;Acc:HGNC:25593]	chr1	212363928	212414901	-1	q32.3	44.57	protein_coding	2917
2e-07	2.96e-06	343.99	817.44	2.37635	208627_s_at	YBX1	ENSG00000065978	Y-box binding protein 1 [Source:HGNC Symbol;Acc:HGNC:8014]	chr1	42682418	42703805	1	p34.2	40.63	protein_coding	3395
< 1e-07	< 1e-07	420.49	955.65	2.27271	208628_s_at	YBX1	ENSG00000065978	Y-box binding protein 1 [Source:HGNC Symbol;Acc:HGNC:8014]	chr1	42682418	42703805	1	p34.2	40.63	protein_coding	3395
0.0001088	0.000587	30.9	50.34	1.62913	211251_x_at	NFYC	ENSG00000066136	nuclear transcription factor Y subunit gamma [Source:HGNC Symbol;Acc:HGNC:7806]	chr1	40691648	40771603	1	p34.2	42.65	protein_coding	5990
0.001202	0.00435	10.23	17.49	1.70968	211797_s_at	NFYC	ENSG00000066136	nuclear transcription factor Y subunit gamma [Source:HGNC Symbol;Acc:HGNC:7806]	chr1	40691648	40771603	1	p34.2	42.65	protein_coding	5990
0.0013797	0.00488	22.49	37.14	1.6514	202216_x_at	NFYC	ENSG00000066136	nuclear transcription factor Y subunit gamma [Source:HGNC Symbol;Acc:HGNC:7806]	chr1	40691648	40771603	1	p34.2	42.65	protein_coding	5990
< 1e-07	< 1e-07	198.84	19.38	0.0974653	223636_at	ZMYND12	ENSG00000066185	zinc finger MYND-type containing 12 [Source:HGNC Symbol;Acc:HGNC:21192]	chr1	42430329	42456253	-1	p34.2	42.82	protein_coding	2181
< 1e-07	< 1e-07	8.7	134.94	15.5103	219918_s_at	ASPM	ENSG00000066279	assembly factor for spindle microtubules [Source:HGNC Symbol;Acc:HGNC:19048]	chr1	197084121	197146694	-1	q31.3	34.66	protein_coding	11994
< 1e-07	< 1e-07	5.47	47.16	8.62157	239002_at	ASPM	ENSG00000066279	assembly factor for spindle microtubules [Source:HGNC Symbol;Acc:HGNC:19048]	chr1	197084121	197146694	-1	q31.3	34.66	protein_coding	11994
< 1e-07	< 1e-07	7.04	35.78	5.08239	232238_at	ASPM	ENSG00000066279	assembly factor for spindle microtubules [Source:HGNC Symbol;Acc:HGNC:19048]	chr1	197084121	197146694	-1	q31.3	34.66	protein_coding	11994
0.001619	0.00558	11.32	18.56	1.63958	244352_at	CD84	ENSG00000066294	CD84 molecule [Source:HGNC Symbol;Acc:HGNC:1704]	chr1	160541095	160579516	-1	q23.3	41.6	protein_coding	9255
4e-07	5.38e-06	23.14	45.31	1.95808	218028_at	ELOVL1	ENSG00000066322	ELOVL fatty acid elongase 1 [Source:HGNC Symbol;Acc:HGNC:14418]	chr1	43363398	43368074	-1	p34.2	58.76	protein_coding	2506
< 1e-07	< 1e-07	61.74	119.36	1.93327	57163_at	ELOVL1	ENSG00000066322	ELOVL fatty acid elongase 1 [Source:HGNC Symbol;Acc:HGNC:14418]	chr1	43363398	43368074	-1	p34.2	58.76	protein_coding	2506
0.0007899	0.00308	300.09	423.61	1.41161	218577_at	LRRC40	ENSG00000066557	leucine rich repeat containing 40 [Source:HGNC Symbol;Acc:HGNC:26004]	chr1	70144805	70205579	-1	p31.1	35.12	protein_coding	2843
3.91e-05	0.000247	96.45	29.84	0.309383	208297_s_at	EVI5	ENSG00000067208	ecotropic viral integration site 5 [Source:HGNC Symbol;Acc:HGNC:3501]	chr1	92508696	92792404	-1	p22.1	38.19	protein_coding	8277
4e-07	5.38e-06	170.11	428.17	2.51702	219037_at	RRP15	ENSG00000067533	ribosomal RNA processing 15 homolog [Source:HGNC Symbol;Acc:HGNC:24255]	chr1	218285293	218337983	1	q41	37.63	protein_coding	7877
0.0028769	0.009	231.67	369.36	1.59434	224582_s_at	NUCKS1	ENSG00000069275	nuclear casein kinase and cyclin dependent kinase substrate 1 [Source:HGNC Symbol;Acc:HGNC:29923]	chr1	205712822	205750182	-1	q32.1	39.53	protein_coding	6449
0.0001476	0.000758	474.72	213.8	0.450371	226625_at	TGFBR3	ENSG00000069702	transforming growth factor beta receptor 3 [Source:HGNC Symbol;Acc:HGNC:11774]	chr1	91680343	91906335	-1	p22.1	42.29	protein_coding	8577
0.0007356	0.0029	77.55	25.91	0.334107	204731_at	TGFBR3	ENSG00000069702	transforming growth factor beta receptor 3 [Source:HGNC Symbol;Acc:HGNC:11774]	chr1	91680343	91906335	-1	p22.1	42.29	protein_coding	8577
1.29e-05	9.83e-05	41.73	77.25	1.85119	218488_at	EIF2B3	ENSG00000070785	eukaryotic translation initiation factor 2B subunit gamma [Source:HGNC Symbol;Acc:HGNC:3259]	chr1	44850522	44986722	-1	p34.1	42.55	protein_coding	3411
0.0048691	0.0139	9.88	4.98	0.504049	1554997_a_at	PTGS2	ENSG00000073756	prostaglandin-endoperoxide synthase 2 [Source:HGNC Symbol;Acc:HGNC:9605]	chr1	186671791	186680922	-1	q31.1	36.06	protein_coding	5484
< 1e-07	< 1e-07	265.46	18.7	0.0704438	204748_at	PTGS2	ENSG00000073756	prostaglandin-endoperoxide synthase 2 [Source:HGNC Symbol;Acc:HGNC:9605]	chr1	186671791	186680922	-1	q31.1	36.06	protein_coding	5484
4e-07	5.38e-06	50.78	178.89	3.52284	216554_s_at	ENO1	ENSG00000074800	enolase 1 [Source:HGNC Symbol;Acc:HGNC:3350]	chr1	8861000	8879190	-1	p36.23	50.15	protein_coding	5216
8e-07	9.64e-06	181.15	478.95	2.64394	201231_s_at	ENO1	ENSG00000074800	enolase 1 [Source:HGNC Symbol;Acc:HGNC:3350]	chr1	8861000	8879190	-1	p36.23	50.15	protein_coding	5216
4.16e-05	0.000259	10.83	27.45	2.53463	217294_s_at	ENO1	ENSG00000074800	enolase 1 [Source:HGNC Symbol;Acc:HGNC:3350]	chr1	8861000	8879190	-1	p36.23	50.15	protein_coding	5216
3.35e-05	0.000217	1073.19	675.39	0.629329	201936_s_at	EIF4G3	ENSG00000075151	eukaryotic translation initiation factor 4 gamma 3 [Source:HGNC Symbol;Acc:HGNC:3298]	chr1	20806292	21176888	-1	p36.12	39.36	protein_coding	11125
0.0003729	0.00165	24.92	13.72	0.550562	1554310_a_at	EIF4G3	ENSG00000075151	eukaryotic translation initiation factor 4 gamma 3 [Source:HGNC Symbol;Acc:HGNC:3298]	chr1	20806292	21176888	-1	p36.12	39.36	protein_coding	11125
0.0065063	0.0178	493.3	355.41	0.720474	201935_s_at	EIF4G3	ENSG00000075151	eukaryotic translation initiation factor 4 gamma 3 [Source:HGNC Symbol;Acc:HGNC:3298]	chr1	20806292	21176888	-1	p36.12	39.36	protein_coding	11125
7e-07	8.64e-06	876.85	484.27	0.552284	227036_at	RASAL2	ENSG00000075391	RAS protein activator like 2 [Source:HGNC Symbol;Acc:HGNC:9874]	chr1	178094104	178484147	1	q25.2	37	protein_coding	16081
1.2e-06	1.36e-05	237.49	76.96	0.324056	1557432_at	RASAL2	ENSG00000075391	RAS protein activator like 2 [Source:HGNC Symbol;Acc:HGNC:9874]	chr1	178094104	178484147	1	q25.2	37	protein_coding	16081
0.0019984	0.00665	9.41	16.08	1.70882	227032_at	PLXNA2	ENSG00000076356	plexin A2 [Source:HGNC Symbol;Acc:HGNC:9100]	chr1	208022242	208244384	-1	q32.2	47.99	protein_coding	13845
0.007734	0.0204	6.85	11.31	1.65109	207290_at	PLXNA2	ENSG00000076356	plexin A2 [Source:HGNC Symbol;Acc:HGNC:9100]	chr1	208022242	208244384	-1	q32.2	47.99	protein_coding	13845
< 1e-07	< 1e-07	9.77	65.47	6.70113	223229_at	UBE2T	ENSG00000077152	ubiquitin conjugating enzyme E2 T [Source:HGNC Symbol;Acc:HGNC:25009]	chr1	202331657	202341980	-1	q32.1	40.71	protein_coding	1652
0.0020939	0.00692	19.46	7.97	0.409558	1557553_at	PPP1R12B	ENSG00000077157	protein phosphatase 1 regulatory subunit 12B [Source:HGNC Symbol;Acc:HGNC:7619]	chr1	202348699	202592706	1	q32.1	39.63	protein_coding	21069
0.0062239	0.0171	13.95	7.45	0.53405	233700_at	PPP1R12B	ENSG00000077157	protein phosphatase 1 regulatory subunit 12B [Source:HGNC Symbol;Acc:HGNC:7619]	chr1	202348699	202592706	1	q32.1	39.63	protein_coding	21069
0.0094891	0.0242	30.97	16.22	0.523733	201957_at	PPP1R12B	ENSG00000077157	protein phosphatase 1 regulatory subunit 12B [Source:HGNC Symbol;Acc:HGNC:7619]	chr1	202348699	202592706	1	q32.1	39.63	protein_coding	21069
1.99e-05	0.000141	121.8	220.33	1.80895	201950_x_at	CAPZB	ENSG00000077549	capping actin protein of muscle Z-line subunit beta [Source:HGNC Symbol;Acc:HGNC:1491]	chr1	19338775	19485539	-1	p36.13	49.21	protein_coding	19094
0.0027689	0.00873	303.45	632.16	2.08324	204137_at	GPR137B	ENSG00000077585	G protein-coupled receptor 137B [Source:HGNC Symbol;Acc:HGNC:11862]	chr1	236142505	236221865	1	q42.3	43.63	protein_coding	2307
0.0002678	0.00125	94.26	196.35	2.08307	200745_s_at	GNB1	ENSG00000078369	G protein subunit beta 1 [Source:HGNC Symbol;Acc:HGNC:4396]	chr1	1785285	1891117	-1	p36.33	46.7	protein_coding	6417
0.0014776	0.00517	355.07	516.49	1.45461	200746_s_at	GNB1	ENSG00000078369	G protein subunit beta 1 [Source:HGNC Symbol;Acc:HGNC:4396]	chr1	1785285	1891117	-1	p36.33	46.7	protein_coding	6417
< 1e-07	< 1e-07	33.72	105.09	3.11655	200744_s_at	GNB1	ENSG00000078369	G protein subunit beta 1 [Source:HGNC Symbol;Acc:HGNC:4396]	chr1	1785285	1891117	-1	p36.33	46.7	protein_coding	6417
0.0020967	0.00692	15.3	24.16	1.57908	217855_x_at	SDF4	ENSG00000078808	stromal cell derived factor 4 [Source:HGNC Symbol;Acc:HGNC:24188]	chr1	1216909	1232067	-1	p36.33	61.39	protein_coding	4744
0.0062801	0.0172	12.06	17.76	1.47264	224472_x_at	SDF4	ENSG00000078808	stromal cell derived factor 4 [Source:HGNC Symbol;Acc:HGNC:24188]	chr1	1216909	1232067	-1	p36.33	61.39	protein_coding	4744
0.0088336	0.0228	16.44	25.91	1.57603	232032_x_at	SDF4	ENSG00000078808	stromal cell derived factor 4 [Source:HGNC Symbol;Acc:HGNC:24188]	chr1	1216909	1232067	-1	p36.33	61.39	protein_coding	4744
0.0074269	0.0198	59.01	89.41	1.51517	209467_s_at	MKNK1	ENSG00000079277	MAPK interacting serine/threonine kinase 1 [Source:HGNC Symbol;Acc:HGNC:7110]	chr1	46557407	46616843	-1	p33	48.24	protein_coding	8071
4.8e-06	4.28e-05	70.2	16.62	0.236752	210743_s_at	CDC14A	ENSG00000079335	cell division cycle 14A [Source:HGNC Symbol;Acc:HGNC:1718]	chr1	100345001	100520277	1	p21.2	38.39	protein_coding	6510
5.6e-06	4.83e-05	141.2	32.79	0.232224	210742_at	CDC14A	ENSG00000079335	cell division cycle 14A [Source:HGNC Symbol;Acc:HGNC:1718]	chr1	100345001	100520277	1	p21.2	38.39	protein_coding	6510
< 1e-07	< 1e-07	264.48	73.58	0.278206	205288_at	CDC14A	ENSG00000079335	cell division cycle 14A [Source:HGNC Symbol;Acc:HGNC:1718]	chr1	100345001	100520277	1	p21.2	38.39	protein_coding	6510
2.43e-05	0.000167	42.38	131.54	3.10382	201968_s_at	PGM1	ENSG00000079739	phosphoglucomutase 1 [Source:HGNC Symbol;Acc:HGNC:8905]	chr1	63593411	63660245	1	p31.3	42.35	protein_coding	4077
0.000649	0.00261	26.22	52.41	1.99886	226770_at	MAGI3	ENSG00000081026	membrane associated guanylate kinase, WW and PDZ domain containing 3 [Source:HGNC Symbol;Acc:HGNC:29647]	chr1	113390515	113685923	1	p13.2	37.14	protein_coding	8414
3e-07	4.21e-06	1347.84	541.29	0.401598	215691_x_at	HSPB11	ENSG00000081870	heat shock protein family B (small) member 11 [Source:HGNC Symbol;Acc:HGNC:25019]	chr1	53916574	53945699	-1	p32.3	39.89	protein_coding	3006
0.0093588	0.0239	139.46	76.86	0.551126	214163_at	HSPB11	ENSG00000081870	heat shock protein family B (small) member 11 [Source:HGNC Symbol;Acc:HGNC:25019]	chr1	53916574	53945699	-1	p32.3	39.89	protein_coding	3006
< 1e-07	< 1e-07	1070.21	193.77	0.181058	203960_s_at	HSPB11	ENSG00000081870	heat shock protein family B (small) member 11 [Source:HGNC Symbol;Acc:HGNC:25019]	chr1	53916574	53945699	-1	p32.3	39.89	protein_coding	3006
0.0007566	0.00297	49.97	90.21	1.80528	200827_at	PLOD1	ENSG00000083444	procollagen-lysine,2-oxoglutarate 5-dioxygenase 1 [Source:HGNC Symbol;Acc:HGNC:9081]	chr1	11934205	11975538	1	p36.22	53.54	protein_coding	5320
0.0007859	0.00307	103.78	61.17	0.58942	225282_at	SMAP2	ENSG00000084070	small ArfGAP2 [Source:HGNC Symbol;Acc:HGNC:25082]	chr1	40344850	40423326	1	p34.2	41.95	protein_coding	3601
0.0008973	0.00342	36.21	56.69	1.56559	202494_at	PPIE	ENSG00000084072	peptidylprolyl isomerase E [Source:HGNC Symbol;Acc:HGNC:9258]	chr1	39692182	39763914	1	p34.2	45.04	protein_coding	11124
2e-07	2.96e-06	1145.72	1979.79	1.72799	202939_at	ZMPSTE24	ENSG00000084073	zinc metallopeptidase STE24 [Source:HGNC Symbol;Acc:HGNC:12877]	chr1	40258041	40294180	1	p34.2	40.81	protein_coding	4022
< 1e-07	< 1e-07	1988.75	10.25	0.00515399	205432_at	OVGP1	ENSG00000085465	oviductal glycoprotein 1 [Source:HGNC Symbol;Acc:HGNC:8524]	chr1	111414319	111427735	-1	p13.2	45.67	protein_coding	2520
< 1e-07	< 1e-07	5.95	19.66	3.3042	205085_at	ORC1	ENSG00000085840	origin recognition complex subunit 1 [Source:HGNC Symbol;Acc:HGNC:8487]	chr1	52372829	52404423	-1	p32.3	44.74	protein_coding	3121
4e-07	5.38e-06	15.59	40.63	2.60616	204558_at	RAD54L	ENSG00000085999	RAD54 like [Source:HGNC Symbol;Acc:HGNC:9826]	chr1	46246461	46278480	1	p34.1	46.88	protein_coding	4078
9.9e-05	0.000541	224.25	85.7	0.382163	231944_at	ERO1B	ENSG00000086619	endoplasmic reticulum oxidoreductase 1 beta [Source:HGNC Symbol;Acc:HGNC:14355]	chr1	236215101	236281958	-1	q42.3	37.44	protein_coding	5788
0.0036979	0.0111	110.81	183.16	1.65292	219649_at	ALG6	ENSG00000088035	ALG6 alpha-1,3-glucosyltransferase [Source:HGNC Symbol;Acc:HGNC:23157]	chr1	63367575	63438553	1	p31.3	37.94	protein_coding	5487
0.0037885	0.0113	9.46	21.56	2.27907	244561_at	SLC9A1	ENSG00000090020	solute carrier family 9 member A1 [Source:HGNC Symbol;Acc:HGNC:11071]	chr1	27098809	27166981	-1	p36.11	51.7	protein_coding	6195
9e-07	1.07e-05	605	331.42	0.547802	201173_x_at	NUDC	ENSG00000090273	nuclear distribution C, dynein complex regulator [Source:HGNC Symbol;Acc:HGNC:8045]	chr1	26900238	26946871	1	p36.11	48.43	protein_coding	2848
0.0001082	0.000584	456.41	267.69	0.586512	210574_s_at	NUDC	ENSG00000090273	nuclear distribution C, dynein complex regulator [Source:HGNC Symbol;Acc:HGNC:8045]	chr1	26900238	26946871	1	p36.11	48.43	protein_coding	2848
0.0074727	0.0199	134.72	205.33	1.52412	201064_s_at	PABPC4	ENSG00000090621	poly(A) binding protein cytoplasmic 4 [Source:HGNC Symbol;Acc:HGNC:8557]	chr1	39560709	39576790	-1	p34.3	47.21	protein_coding	10274
0.0003177	0.00144	119.66	225.41	1.88375	203033_x_at	FH	ENSG00000091483	fumarate hydratase [Source:HGNC Symbol;Acc:HGNC:3700]	chr1	241497511	241519799	-1	q43	36.88	protein_coding	9350
0.0005093	0.00213	221.54	379.74	1.71409	214170_x_at	FH	ENSG00000091483	fumarate hydratase [Source:HGNC Symbol;Acc:HGNC:3700]	chr1	241497511	241519799	-1	q43	36.88	protein_coding	9350
0.005292	0.0149	29.52	59.66	2.021	201397_at	PHGDH	ENSG00000092621	phosphoglycerate dehydrogenase [Source:HGNC Symbol;Acc:HGNC:8923]	chr1	119648411	119744218	1	p12	43.78	protein_coding	9187
3.6e-05	0.000231	94.94	186.62	1.96566	218287_s_at	AGO1	ENSG00000092847	argonaute RISC component 1 [Source:HGNC Symbol;Acc:HGNC:3262]	chr1	35869808	35930532	1	p34.3	44.84	protein_coding	13890
< 1e-07	< 1e-07	147.68	10.78	0.0729957	210323_at	TEKT2	ENSG00000092850	tektin 2 [Source:HGNC Symbol;Acc:HGNC:11725]	chr1	36084094	36088275	1	p34.3	58.32	protein_coding	1959
3.68e-05	0.000235	5.23	14.72	2.81453	243840_at	CLSPN	ENSG00000092853	claspin [Source:HGNC Symbol;Acc:HGNC:19715]	chr1	35720218	35769978	-1	p34.3	42.79	protein_coding	9591
0.0008404	0.00325	4.85	8.99	1.85361	242150_at	CLSPN	ENSG00000092853	claspin [Source:HGNC Symbol;Acc:HGNC:19715]	chr1	35720218	35769978	-1	p34.3	42.79	protein_coding	9591
0.0015963	0.00551	775.27	306.25	0.395024	228121_at	TGFB2	ENSG00000092969	transforming growth factor beta 2 [Source:HGNC Symbol;Acc:HGNC:11768]	chr1	218345336	218444619	1	q41	42.03	protein_coding	6050
0.0030834	0.00953	74.1	25.11	0.338866	220407_s_at	TGFB2	ENSG00000092969	transforming growth factor beta 2 [Source:HGNC Symbol;Acc:HGNC:11768]	chr1	218345336	218444619	1	q41	42.03	protein_coding	6050
4e-07	5.38e-06	14.61	35.69	2.44285	208002_s_at	ACOT7	ENSG00000097021	acyl-CoA thioesterase 7 [Source:HGNC Symbol;Acc:HGNC:24157]	chr1	6264269	6393767	-1	p36.31	53.97	protein_coding	3500
0.0006628	0.00266	109.12	60.58	0.555169	209090_s_at	SH3GLB1	ENSG00000097033	SH3 domain containing GRB2 like, endophilin B1 [Source:HGNC Symbol;Acc:HGNC:10833]	chr1	86704570	86748184	1	p22.3	36.11	protein_coding	6881
1.5e-06	1.63e-05	88.03	569.54	6.46984	204510_at	CDC7	ENSG00000097046	cell division cycle 7 [Source:HGNC Symbol;Acc:HGNC:1745]	chr1	91500851	91525764	1	p22.1	36.66	protein_coding	3599
6.31e-05	0.00037	92.59	37.31	0.402959	218736_s_at	PALMD	ENSG00000099260	palmdelphin [Source:HGNC Symbol;Acc:HGNC:15846]	chr1	99646113	99694541	1	p21.2	37.49	protein_coding	8074
0.0003491	0.00156	48.36	20.81	0.430314	222725_s_at	PALMD	ENSG00000099260	palmdelphin [Source:HGNC Symbol;Acc:HGNC:15846]	chr1	99646113	99694541	1	p21.2	37.49	protein_coding	8074
0.0075218	0.02	390.29	269.09	0.689462	212911_at	DNAJC16	ENSG00000116138	DnaJ heat shock protein family (Hsp40) member C16 [Source:HGNC Symbol;Acc:HGNC:29157]	chr1	15526813	15592379	1	p36.21	44.67	protein_coding	8563
0.0005845	0.00239	43.87	16.47	0.375427	226653_at	MARK1	ENSG00000116141	microtubule affinity regulating kinase 1 [Source:HGNC Symbol;Acc:HGNC:6896]	chr1	220528136	220664461	1	q41	37.11	protein_coding	15255
0.0032045	0.00985	61.71	42.45	0.687895	219852_s_at	MORN1	ENSG00000116151	MORN repeat containing 1 [Source:HGNC Symbol;Acc:HGNC:25852]	chr1	2321253	2391707	-1	p36.32	57.29	protein_coding	11337
1.66e-05	0.000122	15.41	48.92	3.17456	213170_at	GPX7	ENSG00000116157	glutathione peroxidase 7 [Source:HGNC Symbol;Acc:HGNC:4559]	chr1	52602371	52609051	1	p32.3	49.68	protein_coding	1692
1e-07	1.6e-06	100.88	261.99	2.59705	210691_s_at	CACYBP	ENSG00000116161	calcyclin binding protein [Source:HGNC Symbol;Acc:HGNC:30423]	chr1	174999163	175012027	1	q25.1	40.41	protein_coding	4611
5e-07	6.53e-06	151.36	360.79	2.38365	201381_x_at	CACYBP	ENSG00000116161	calcyclin binding protein [Source:HGNC Symbol;Acc:HGNC:30423]	chr1	174999163	175012027	1	q25.1	40.41	protein_coding	4611
0.0052439	0.0148	87.55	56.45	0.644774	201382_at	CACYBP	ENSG00000116161	calcyclin binding protein [Source:HGNC Symbol;Acc:HGNC:30423]	chr1	174999163	175012027	1	q25.1	40.41	protein_coding	4611
1.63e-05	0.00012	89.75	160.25	1.78552	202916_s_at	FAM20B	ENSG00000116199	FAM20B glycosaminoglycan xylosylkinase [Source:HGNC Symbol;Acc:HGNC:23017]	chr1	179025804	179076567	1	q25.2	43.17	protein_coding	6046
4.19e-05	0.000261	79.09	167.14	2.11329	202915_s_at	FAM20B	ENSG00000116199	FAM20B glycosaminoglycan xylosylkinase [Source:HGNC Symbol;Acc:HGNC:23017]	chr1	179025804	179076567	1	q25.2	43.17	protein_coding	6046
1.42e-05	0.000107	28	67.62	2.415	215084_s_at	LRRC42	ENSG00000116212	leucine rich repeat containing 42 [Source:HGNC Symbol;Acc:HGNC:28792]	chr1	53946085	53968168	1	p32.3	43.07	protein_coding	2164
0.0007659	0.003	10.32	15.75	1.52616	219322_s_at	WRAP73	ENSG00000116213	WD repeat containing, antisense to TP73 [Source:HGNC Symbol;Acc:HGNC:12759]	chr1	3630767	3652761	-1	p36.32	55.25	protein_coding	7634
0.0052508	0.0148	6.9	11.36	1.64638	236381_s_at	WRAP73	ENSG00000116213	WD repeat containing, antisense to TP73 [Source:HGNC Symbol;Acc:HGNC:12759]	chr1	3630767	3652761	-1	p36.32	55.25	protein_coding	7634
< 1e-07	< 1e-07	21.96	67.49	3.07332	222993_at	MRPL37	ENSG00000116221	mitochondrial ribosomal protein L37 [Source:HGNC Symbol;Acc:HGNC:14034]	chr1	54184041	54225464	1	p32.3	48.9	protein_coding	2549
7.9e-06	6.47e-05	126.39	276.08	2.18435	201609_x_at	ICMT	ENSG00000116237	isoprenylcysteine carboxyl methyltransferase [Source:HGNC Symbol;Acc:HGNC:5350]	chr1	6221193	6235972	-1	p36.31	49.59	protein_coding	4910
1.09e-05	8.52e-05	282.8	161.03	0.569413	201482_at	QSOX1	ENSG00000116260	quiescin sulfhydryl oxidase 1 [Source:HGNC Symbol;Acc:HGNC:9756]	chr1	180154869	180204030	1	q25.2	51.85	protein_coding	9276
9.95e-05	0.000544	322.91	574.89	1.78034	225005_at	PHF13	ENSG00000116273	PHD finger protein 13 [Source:HGNC Symbol;Acc:HGNC:22983]	chr1	6613731	6624030	1	p36.31	54.94	protein_coding	3632
0.0018987	0.00637	1511.79	707.44	0.467949	224657_at	ERRFI1	ENSG00000116285	ERBB receptor feedback inhibitor 1 [Source:HGNC Symbol;Acc:HGNC:18185]	chr1	8004404	8026309	-1	p36.23	42.8	protein_coding	4179
< 1e-07	< 1e-07	163.91	12.92	0.0788237	226248_s_at	ELAPOR1	ENSG00000116299	endosome-lysosome associated apoptosis and autophagy regulator 1 [Source:HGNC Symbol;Acc:HGNC:29618]	chr1	109113679	109206781	1	p13.3	45.89	protein_coding	9194
< 1e-07	< 1e-07	961.49	34.17	0.0355386	221874_at	ELAPOR1	ENSG00000116299	endosome-lysosome associated apoptosis and autophagy regulator 1 [Source:HGNC Symbol;Acc:HGNC:29618]	chr1	109113679	109206781	1	p13.3	45.89	protein_coding	9194
2.77e-05	0.000186	570.75	288.51	0.505493	242837_at	SRSF4	ENSG00000116350	serine and arginine rich splicing factor 4 [Source:HGNC Symbol;Acc:HGNC:10786]	chr1	29147743	29181900	-1	p35.3	42.93	protein_coding	8806
6.64e-05	0.000386	141.19	246.43	1.74538	220926_s_at	EDEM3	ENSG00000116406	ER degradation enhancing alpha-mannosidase like protein 3 [Source:HGNC Symbol;Acc:HGNC:16787]	chr1	184690237	184754907	-1	q25.3	34.39	protein_coding	7792
3e-07	4.21e-06	1272.24	288.75	0.226962	201421_s_at	WDR77	ENSG00000116455	WD repeat domain 77 [Source:HGNC Symbol;Acc:HGNC:29652]	chr1	111439890	111449256	-1	p13.2	44.39	protein_coding	2685
1.5e-06	1.63e-05	333.6	71.48	0.214269	201420_s_at	WDR77	ENSG00000116455	WD repeat domain 77 [Source:HGNC Symbol;Acc:HGNC:29652]	chr1	111439890	111449256	-1	p13.2	44.39	protein_coding	2685
0.0001281	0.000672	36.07	17.65	0.489326	228548_at	RAP1A	ENSG00000116473	RAP1A, member of RAS oncogene family [Source:HGNC Symbol;Acc:HGNC:9855]	chr1	111542218	111716691	1	p13.2	39.31	protein_coding	5532
1.08e-05	8.46e-05	85.54	175.93	2.0567	201771_at	SCAMP3	ENSG00000116521	secretory carrier membrane protein 3 [Source:HGNC Symbol;Acc:HGNC:10565]	chr1	155255979	155262430	-1	q22	51.95	protein_coding	2442
0.0001309	0.000684	1764.7	2748.39	1.55743	201586_s_at	SFPQ	ENSG00000116560	splicing factor proline and glutamine rich [Source:HGNC Symbol;Acc:HGNC:10774]	chr1	35176378	35193145	-1	p34.3	41.82	protein_coding	7419
0.0016024	0.00553	326.94	204.7	0.626109	221768_at	SFPQ	ENSG00000116560	splicing factor proline and glutamine rich [Source:HGNC Symbol;Acc:HGNC:10774]	chr1	35176378	35193145	-1	p34.3	41.82	protein_coding	7419
4.61e-05	0.000283	50.69	15.91	0.313869	223169_s_at	RHOU	ENSG00000116574	ras homolog family member U [Source:HGNC Symbol;Acc:HGNC:17794]	chr1	228735479	228746664	1	q42.13	45.48	protein_coding	3965
0.0011023	0.00405	674.02	321.15	0.47647	223168_at	RHOU	ENSG00000116574	ras homolog family member U [Source:HGNC Symbol;Acc:HGNC:17794]	chr1	228735479	228746664	1	q42.13	45.48	protein_coding	3965
3.95e-05	0.000248	21.37	36.11	1.68975	207629_s_at	ARHGEF2	ENSG00000116584	Rho/Rac guanine nucleotide exchange factor 2 [Source:HGNC Symbol;Acc:HGNC:682]	chr1	155946851	156007070	-1	q22	50.95	protein_coding	9155
0.0009782	0.00368	39.14	61.65	1.57511	218291_at	LAMTOR2	ENSG00000116586	late endosomal/lysosomal adaptor, MAPK and MTOR activator 2 [Source:HGNC Symbol;Acc:HGNC:29796]	chr1	156054782	156058506	1	q22	50.95	protein_coding	1404
0.0008406	0.00325	60.95	41.2	0.675964	225641_at	MEF2D	ENSG00000116604	myocyte enhancer factor 2D [Source:HGNC Symbol;Acc:HGNC:6997]	chr1	156463727	156500779	-1	q22	54.21	protein_coding	6351
2e-07	2.96e-06	20.73	81.96	3.95369	223125_s_at	C1orf21	ENSG00000116667	chromosome 1 open reading frame 21 [Source:HGNC Symbol;Acc:HGNC:15494]	chr1	184387029	184629019	1	q25.3	40.27	protein_coding	11594
< 1e-07	< 1e-07	12.74	29.27	2.29749	223234_at	MAD2L2	ENSG00000116670	mitotic arrest deficient 2 like 2 [Source:HGNC Symbol;Acc:HGNC:6764]	chr1	11674480	11691650	-1	p36.22	53.91	protein_coding	3324
0.0004178	0.00181	58.76	101.89	1.734	201155_s_at	MFN2	ENSG00000116688	mitofusin 2 [Source:HGNC Symbol;Acc:HGNC:16877]	chr1	11980181	12015211	1	p36.22	50.93	protein_coding	10234
0.0001644	0.000828	10.25	19.49	1.90146	206007_at	PRG4	ENSG00000116690	proteoglycan 4 [Source:HGNC Symbol;Acc:HGNC:9364]	chr1	186296279	186314567	1	q31.1	38.06	protein_coding	5049
0.0004463	0.00191	32.4	49.02	1.51296	218551_at	MIIP	ENSG00000116691	migration and invasion inhibitory protein [Source:HGNC Symbol;Acc:HGNC:25715]	chr1	12019466	12032045	1	p36.22	55.62	protein_coding	2821
0.0008763	0.00336	12.72	19.15	1.5055	48659_at	MIIP	ENSG00000116691	migration and invasion inhibitory protein [Source:HGNC Symbol;Acc:HGNC:25715]	chr1	12019466	12032045	1	p36.22	55.62	protein_coding	2821
2.6e-06	2.58e-05	7.7	19.1	2.48052	209949_at	NCF2	ENSG00000116701	neutrophil cytosolic factor 2 [Source:HGNC Symbol;Acc:HGNC:7661]	chr1	183555562	183590876	-1	q25.3	46.59	protein_coding	2929
< 1e-07	< 1e-07	98.08	8.67	0.0883972	210145_at	PLA2G4A	ENSG00000116711	phospholipase A2 group IVA [Source:HGNC Symbol;Acc:HGNC:9035]	chr1	186828949	186988981	1	q31.1	36.1	protein_coding	2879
0.0002101	0.00102	299.24	117.31	0.392026	221958_s_at	WLS	ENSG00000116729	Wnt ligand secretion mediator [Source:HGNC Symbol;Acc:HGNC:30238]	chr1	68098473	68233120	-1	p31.3	41.57	protein_coding	4459
0.0076411	0.0202	289.21	407.1	1.40763	203057_s_at	PRDM2	ENSG00000116731	PR/SET domain 2 [Source:HGNC Symbol;Acc:HGNC:9347]	chr1	13700198	13825079	1	p36.21	43.44	protein_coding	10923
1.6e-05	0.000118	7.82	17.49	2.23657	212839_s_at	RO60	ENSG00000116747	Ro60, Y RNA binding protein [Source:HGNC Symbol;Acc:HGNC:11313]	chr1	193059454	193091777	1	q31.2	35.95	protein_coding	9070
1.65e-05	0.000121	10.47	20.38	1.94651	220083_x_at	UCHL5	ENSG00000116750	ubiquitin C-terminal hydrolase L5 [Source:HGNC Symbol;Acc:HGNC:19678]	chr1	193012250	193060080	-1	q31.2	35	protein_coding	6661
< 1e-07	< 1e-07	8.79	27.36	3.11263	219960_s_at	UCHL5	ENSG00000116750	ubiquitin C-terminal hydrolase L5 [Source:HGNC Symbol;Acc:HGNC:19678]	chr1	193012250	193060080	-1	q31.2	35	protein_coding	6661
2.9e-06	2.82e-05	145.08	265.35	1.82899	203053_at	BCAS2	ENSG00000116752	BCAS2 pre-mRNA processing factor [Source:HGNC Symbol;Acc:HGNC:975]	chr1	114567557	114581629	-1	p13.2	40.33	protein_coding	1289
1.3e-05	9.89e-05	1686.66	849.22	0.503492	200685_at	SRSF11	ENSG00000116754	serine and arginine rich splicing factor 11 [Source:HGNC Symbol;Acc:HGNC:10782]	chr1	70205682	70253052	1	p31.1	37.01	protein_coding	8473
0.0050766	0.0144	2564.96	1870.33	0.729185	213742_at	SRSF11	ENSG00000116754	serine and arginine rich splicing factor 11 [Source:HGNC Symbol;Acc:HGNC:10782]	chr1	70205682	70253052	1	p31.1	37.01	protein_coding	8473
< 1e-07	< 1e-07	21.87	160.1	7.32053	221648_s_at	AGMAT	ENSG00000116771	agmatinase [Source:HGNC Symbol;Acc:HGNC:18407]	chr1	15571699	15585051	-1	p36.21	49.29	protein_coding	3095
0.0001046	0.000568	16.41	8.57	0.522243	241858_at	TNNI3K	ENSG00000116783	TNNI3 interacting kinase [Source:HGNC Symbol;Acc:HGNC:19661]	chr1	74235387	74544428	1	p31.1	36.79	protein_coding	4733
0.0001097	0.000591	820.41	303.19	0.369559	202950_at	CRYZ	ENSG00000116791	crystallin zeta [Source:HGNC Symbol;Acc:HGNC:2419]	chr1	74705482	74733408	-1	p31.1	39.61	protein_coding	4085
0.0042539	0.0125	9.06	15.98	1.7638	211744_s_at	CD58	ENSG00000116815	CD58 molecule [Source:HGNC Symbol;Acc:HGNC:1688]	chr1	116514534	116571039	-1	p13.1	41.62	protein_coding	1784
0.00224	0.00732	16.11	27.97	1.73619	204407_at	TTF2	ENSG00000116830	transcription termination factor 2 [Source:HGNC Symbol;Acc:HGNC:12398]	chr1	117060326	117107453	1	p13.1	41.15	protein_coding	10158
0.0085179	0.0221	8.7	15.39	1.76897	204411_at	KIF21B	ENSG00000116852	kinesin family member 21B [Source:HGNC Symbol;Acc:HGNC:29442]	chr1	200969390	201023714	-1	q32.1	55.01	protein_coding	12164
6e-07	7.62e-06	19.41	33.83	1.74292	222987_s_at	TMEM9	ENSG00000116857	transmembrane protein 9 [Source:HGNC Symbol;Acc:HGNC:18823]	chr1	201134772	201171574	-1	q32.1	48.53	protein_coding	3919
0.0003368	0.00152	467.54	769.54	1.64593	222988_s_at	TMEM9	ENSG00000116857	transmembrane protein 9 [Source:HGNC Symbol;Acc:HGNC:18823]	chr1	201134772	201171574	-1	q32.1	48.53	protein_coding	3919
3.77e-05	0.00024	1389.04	852.86	0.613992	223097_at	ADPRS	ENSG00000116863	ADP-ribosylserine hydrolase [Source:HGNC Symbol;Acc:HGNC:21304]	chr1	36088892	36093932	1	p34.3	55.11	protein_coding	1651
3.51e-05	0.000226	14.17	29.08	2.05222	217943_s_at	MAP7D1	ENSG00000116871	MAP7 domain containing 1 [Source:HGNC Symbol;Acc:HGNC:25514]	chr1	36155579	36180849	1	p34.3	54.66	protein_coding	5271
< 1e-07	< 1e-07	163.41	31.71	0.194052	227359_at	OSCP1	ENSG00000116885	organic solute carrier partner 1 [Source:HGNC Symbol;Acc:HGNC:29971]	chr1	36415827	36450451	-1	p34.3	45.44	protein_coding	2788
3.57e-05	0.000229	98.92	219.76	2.22159	221437_s_at	MRPS15	ENSG00000116898	mitochondrial ribosomal protein S15 [Source:HGNC Symbol;Acc:HGNC:14504]	chr1	36455718	36464384	-1	p34.3	49.26	protein_coding	2863
0.0004262	0.00184	120.79	210.84	1.74551	223292_s_at	MRPS15	ENSG00000116898	mitochondrial ribosomal protein S15 [Source:HGNC Symbol;Acc:HGNC:14504]	chr1	36455718	36464384	-1	p34.3	49.26	protein_coding	2863
< 1e-07	< 1e-07	19.91	49.25	2.47363	223291_at	MRPS15	ENSG00000116898	mitochondrial ribosomal protein S15 [Source:HGNC Symbol;Acc:HGNC:14504]	chr1	36455718	36464384	-1	p34.3	49.26	protein_coding	2863
1.2e-06	1.36e-05	41.54	77.72	1.87097	218712_at	C1orf109	ENSG00000116922	chromosome 1 open reading frame 109 [Source:HGNC Symbol;Acc:HGNC:26039]	chr1	37681570	37692249	-1	p34.3	48.39	protein_coding	4443
2.2e-06	2.25e-05	38.07	100.89	2.65012	222514_at	RRAGC	ENSG00000116954	Ras related GTP binding C [Source:HGNC Symbol;Acc:HGNC:19902]	chr1	38838198	38859772	-1	p34.3	41.36	protein_coding	5116
0.0001484	0.000761	381.6	185.72	0.486688	226969_at	MTR	ENSG00000116984	5-methyltetrahydrofolate-homocysteine methyltransferase [Source:HGNC Symbol;Acc:HGNC:7468]	chr1	236795260	236921278	1	q43	40.64	protein_coding	19254
0.0005856	0.00239	7.74	14.02	1.81137	235275_at	BMP8B	ENSG00000116985	bone morphogenetic protein 8b [Source:HGNC Symbol;Acc:HGNC:1075]	chr1	39757182	39788865	-1	p34.2	55.56	protein_coding	4826
< 1e-07	1.6e-06	5.34	19.75	3.6985	215491_at	MYCL	ENSG00000116990	MYCL proto-oncogene, bHLH transcription factor [Source:HGNC Symbol;Acc:HGNC:7555]	chr1	39895426	39902256	-1	p34.2	53.68	protein_coding	5063
1.5e-06	1.63e-05	8.47	27.05	3.19362	214058_at	MYCL	ENSG00000116990	MYCL proto-oncogene, bHLH transcription factor [Source:HGNC Symbol;Acc:HGNC:7555]	chr1	39895426	39902256	-1	p34.2	53.68	protein_coding	5063
0.0001527	0.000778	75.08	165.01	2.19779	225056_at	SIPA1L2	ENSG00000116991	signal induced proliferation associated 1 like 2 [Source:HGNC Symbol;Acc:HGNC:23800]	chr1	232397965	232630571	-1	q42.2	41.29	protein_coding	8552
0.0005384	0.00223	31.04	60.63	1.95329	233587_s_at	SIPA1L2	ENSG00000116991	signal induced proliferation associated 1 like 2 [Source:HGNC Symbol;Acc:HGNC:23800]	chr1	232397965	232630571	-1	q42.2	41.29	protein_coding	8552
0.0036901	0.0111	7.16	16.19	2.26117	211138_s_at	KMO	ENSG00000117009	kynurenine 3-monooxygenase [Source:HGNC Symbol;Acc:HGNC:6381]	chr1	241532134	241595642	1	q43	38	protein_coding	5946
0.0048932	0.014	7.48	15.89	2.12433	205306_x_at	KMO	ENSG00000117009	kynurenine 3-monooxygenase [Source:HGNC Symbol;Acc:HGNC:6381]	chr1	241532134	241595642	1	q43	38	protein_coding	5946
0.0083114	0.0217	8.38	16.31	1.9463	204730_at	RIMS3	ENSG00000117016	regulating synaptic membrane exocytosis 3 [Source:HGNC Symbol;Acc:HGNC:21292]	chr1	40620680	40665682	-1	p34.2	51.4	protein_coding	7259
2.23e-05	0.000155	26.36	9.3	0.352807	242879_x_at	AKT3	ENSG00000117020	AKT serine/threonine kinase 3 [Source:HGNC Symbol;Acc:HGNC:393]	chr1	243488233	243851079	-1	q44	37.34	protein_coding	16643
0.0016452	0.00565	492.89	282.64	0.573434	212609_s_at	AKT3	ENSG00000117020	AKT serine/threonine kinase 3 [Source:HGNC Symbol;Acc:HGNC:393]	chr1	243488233	243851079	-1	q44	37.34	protein_coding	16643
0.0029012	0.00906	123.29	44.71	0.362641	212607_at	AKT3	ENSG00000117020	AKT serine/threonine kinase 3 [Source:HGNC Symbol;Acc:HGNC:393]	chr1	243488233	243851079	-1	q44	37.34	protein_coding	16643
0.0054232	0.0152	18.96	12.06	0.636076	242876_at	AKT3	ENSG00000117020	AKT serine/threonine kinase 3 [Source:HGNC Symbol;Acc:HGNC:393]	chr1	243488233	243851079	-1	q44	37.34	protein_coding	16643
0.0084618	0.022	282.96	427.4	1.51046	227200_at	ETV3	ENSG00000117036	ETS variant transcription factor 3 [Source:HGNC Symbol;Acc:HGNC:3492]	chr1	157121191	157138474	-1	q23.1	43.29	protein_coding	6707
0.0017508	0.00595	37.83	14.18	0.374835	230482_at	ST6GALNAC5	ENSG00000117069	ST6 N-acetylgalactosaminide alpha-2,6-sialyltransferase 5 [Source:HGNC Symbol;Acc:HGNC:19342]	chr1	76867480	77067546	1	p31.1	39.92	protein_coding	6059
0.000229	0.0011	10.62	4.65	0.437853	1569850_at	ADGRL2	ENSG00000117114	adhesion G protein-coupled receptor L2 [Source:HGNC Symbol;Acc:HGNC:18582]	chr1	81306147	81992436	1	p31.1	36.78	protein_coding	22649
0.0074742	0.0199	44.45	26.16	0.588526	206953_s_at	ADGRL2	ENSG00000117114	adhesion G protein-coupled receptor L2 [Source:HGNC Symbol;Acc:HGNC:18582]	chr1	81306147	81992436	1	p31.1	36.78	protein_coding	22649
1.82e-05	0.000131	71.12	164.02	2.30624	202675_at	SDHB	ENSG00000117118	succinate dehydrogenase complex iron sulfur subunit B [Source:HGNC Symbol;Acc:HGNC:10681]	chr1	17018722	17054032	-1	p36.13	43.42	protein_coding	2324
5.9e-06	5.05e-05	7.22	21.17	2.93213	203417_at	MFAP2	ENSG00000117122	microfibril associated protein 2 [Source:HGNC Symbol;Acc:HGNC:7033]	chr1	16974502	16980632	-1	p36.13	62.13	protein_coding	2712
0.000204	0.000995	47.57	30.49	0.64095	218923_at	CTBS	ENSG00000117151	chitobiase [Source:HGNC Symbol;Acc:HGNC:2496]	chr1	84549611	84574480	-1	p22.3	36.59	protein_coding	6934
0.0029001	0.00906	63.32	35.12	0.554643	218924_s_at	CTBS	ENSG00000117151	chitobiase [Source:HGNC Symbol;Acc:HGNC:2496]	chr1	84549611	84574480	-1	p22.3	36.59	protein_coding	6934
3.74e-05	0.000238	6.53	10.14	1.55283	219931_s_at	KLHL12	ENSG00000117153	kelch like family member 12 [Source:HGNC Symbol;Acc:HGNC:19360]	chr1	202891116	202928636	-1	q32.1	41.92	protein_coding	3508
7.87e-05	0.000444	184.52	324.26	1.75732	225068_at	KLHL12	ENSG00000117153	kelch like family member 12 [Source:HGNC Symbol;Acc:HGNC:19360]	chr1	202891116	202928636	-1	q32.1	41.92	protein_coding	3508
2.1e-06	2.16e-05	29.65	121.33	4.09207	202270_at	GBP1	ENSG00000117228	guanylate binding protein 1 [Source:HGNC Symbol;Acc:HGNC:4182]	chr1	89051882	89065360	-1	p22.2	37.94	protein_coding	6103
0.0003742	0.00165	42.06	157.49	3.74441	231577_s_at	GBP1	ENSG00000117228	guanylate binding protein 1 [Source:HGNC Symbol;Acc:HGNC:4182]	chr1	89051882	89065360	-1	p22.2	37.94	protein_coding	6103
0.0005145	0.00215	70.74	237.73	3.36062	202269_x_at	GBP1	ENSG00000117228	guanylate binding protein 1 [Source:HGNC Symbol;Acc:HGNC:4182]	chr1	89051882	89065360	-1	p22.2	37.94	protein_coding	6103
1.9e-06	1.99e-05	32.47	84.1	2.59008	218699_at	RAB29	ENSG00000117280	RAB29, member RAS oncogene family [Source:HGNC Symbol;Acc:HGNC:9789]	chr1	205767986	205775482	-1	q32.1	46.01	protein_coding	3904
2.68e-05	0.000181	719.37	434.78	0.60439	208783_s_at	CD46	ENSG00000117335	CD46 molecule [Source:HGNC Symbol;Acc:HGNC:6953]	chr1	207752054	207795513	1	q32.2	38.22	protein_coding	8711
< 1e-07	1.6e-06	7.04	21.07	2.9929	1554417_s_at	APH1A	ENSG00000117362	aph-1 homolog A, gamma-secretase subunit [Source:HGNC Symbol;Acc:HGNC:29509]	chr1	150265399	150269580	-1	q21.2	53.83	protein_coding	3473
0.0010485	0.00389	8.93	16.29	1.82419	237327_at	APH1A	ENSG00000117362	aph-1 homolog A, gamma-secretase subunit [Source:HGNC Symbol;Acc:HGNC:29509]	chr1	150265399	150269580	-1	q21.2	53.83	protein_coding	3473
< 1e-07	< 1e-07	352.89	828.02	2.3464	218389_s_at	APH1A	ENSG00000117362	aph-1 homolog A, gamma-secretase subunit [Source:HGNC Symbol;Acc:HGNC:29509]	chr1	150265399	150269580	-1	q21.2	53.83	protein_coding	3473
0.0022018	0.00722	7.31	11.44	1.56498	220750_s_at	P3H1	ENSG00000117385	prolyl 3-hydroxylase 1 [Source:HGNC Symbol;Acc:HGNC:19316]	chr1	42746335	42767084	-1	p34.2	50.04	protein_coding	6766
0.0014455	0.00508	73.04	153.1	2.09611	201250_s_at	SLC2A1	ENSG00000117394	solute carrier family 2 member 1 [Source:HGNC Symbol;Acc:HGNC:11005]	chr1	42925353	42958893	-1	p34.2	52.75	protein_coding	6614
4.62e-05	0.000283	241.87	422.02	1.74482	201323_at	EBNA1BP2	ENSG00000117395	EBNA1 binding protein 2 [Source:HGNC Symbol;Acc:HGNC:15531]	chr1	43164175	43270936	-1	p34.2	44.38	protein_coding	3561
< 1e-07	< 1e-07	14.2	83.69	5.89366	202870_s_at	CDC20	ENSG00000117399	cell division cycle 20 [Source:HGNC Symbol;Acc:HGNC:1723]	chr1	43358981	43363203	1	p34.2	52.17	protein_coding	2012
1.1e-06	1.27e-05	80.39	146.48	1.82212	200078_s_at	ATP6V0B	ENSG00000117410	ATPase H+ transporting V0 subunit b [Source:HGNC Symbol;Acc:HGNC:861]	chr1	43974487	43978295	1	p34.1	57.08	protein_coding	3239
6.46e-05	0.000377	9.58	17.01	1.77557	209413_at	B4GALT2	ENSG00000117411	beta-1,4-galactosyltransferase 2 [Source:HGNC Symbol;Acc:HGNC:925]	chr1	43978943	43991170	1	p34.1	56.94	protein_coding	5472
0.0001136	0.000609	969.39	1448.23	1.49396	208680_at	PRDX1	ENSG00000117450	peroxiredoxin 1 [Source:HGNC Symbol;Acc:HGNC:9352]	chr1	45510914	45542732	-1	p34.1	46.41	protein_coding	1682
0.0022878	0.00745	6.95	11.72	1.68633	211580_s_at	PIK3R3	ENSG00000117461	phosphoinositide-3-kinase regulatory subunit 3 [Source:HGNC Symbol;Acc:HGNC:8981]	chr1	46040140	46133036	-1	p34.1	40.27	protein_coding	7397
< 1e-07	< 1e-07	60.87	356.51	5.85691	202743_at	PIK3R3	ENSG00000117461	phosphoinositide-3-kinase regulatory subunit 3 [Source:HGNC Symbol;Acc:HGNC:8981]	chr1	46040140	46133036	-1	p34.1	40.27	protein_coding	7397
8.32e-05	0.000465	57.54	23.78	0.413278	209114_at	TSPAN1	ENSG00000117472	tetraspanin 1 [Source:HGNC Symbol;Acc:HGNC:20657]	chr1	46175073	46185962	1	p34.1	50.7	protein_coding	2370
0.0001644	0.000828	34.78	11.97	0.344163	1558560_s_at	BLZF1	ENSG00000117475	basic leucine zipper nuclear factor 1 [Source:HGNC Symbol;Acc:HGNC:1065]	chr1	169367970	169396540	1	q24.2	35.78	protein_coding	3820
0.0070978	0.0191	6.55	9.04	1.38015	203840_at	BLZF1	ENSG00000117475	basic leucine zipper nuclear factor 1 [Source:HGNC Symbol;Acc:HGNC:1065]	chr1	169367970	169396540	1	q24.2	35.78	protein_coding	3820
< 1e-07	< 1e-07	66.01	5.89	0.0892289	206721_at	CCDC181	ENSG00000117477	coiled-coil domain containing 181 [Source:HGNC Symbol;Acc:HGNC:28051]	chr1	169394870	169460669	-1	q24.2	36.8	protein_coding	3961
< 1e-07	< 1e-07	40.62	5.74	0.14131	1555112_a_at	CCDC181	ENSG00000117477	coiled-coil domain containing 181 [Source:HGNC Symbol;Acc:HGNC:28051]	chr1	169394870	169460669	-1	q24.2	36.8	protein_coding	3961
0.0008436	0.00326	904.23	413.05	0.456797	209681_at	SLC19A2	ENSG00000117479	solute carrier family 19 member 2 [Source:HGNC Symbol;Acc:HGNC:10938]	chr1	169463909	169485944	-1	q24.2	38.65	protein_coding	4364
0.0003406	0.00153	9.67	15.82	1.63599	226351_at	NSUN4	ENSG00000117481	NOP2/Sun RNA methyltransferase 4 [Source:HGNC Symbol;Acc:HGNC:31802]	chr1	46340789	46365152	1	p33	47.09	protein_coding	7856
0.0033254	0.0101	15.95	30.94	1.93981	230023_at	NSUN4	ENSG00000117481	NOP2/Sun RNA methyltransferase 4 [Source:HGNC Symbol;Acc:HGNC:31802]	chr1	46340789	46365152	1	p33	47.09	protein_coding	7856
0.0004016	0.00175	10.08	5.91	0.58631	221182_at	MROH9	ENSG00000117501	maestro heat like repeat family member 9 [Source:HGNC Symbol;Acc:HGNC:26287]	chr1	170935526	171064765	1	q24.3	37.59	protein_coding	3776
1.2e-06	1.36e-05	28.8	69.87	2.42604	209188_x_at	DR1	ENSG00000117505	down-regulator of transcription 1 [Source:HGNC Symbol;Acc:HGNC:3017]	chr1	93345907	93369493	1	p22.1	36.44	protein_coding	10925
4.3e-06	3.9e-05	20.37	53.15	2.60923	207654_x_at	DR1	ENSG00000117505	down-regulator of transcription 1 [Source:HGNC Symbol;Acc:HGNC:3017]	chr1	93345907	93369493	1	p22.1	36.44	protein_coding	10925
1.82e-05	0.000131	10.3	26.43	2.56602	216652_s_at	DR1	ENSG00000117505	down-regulator of transcription 1 [Source:HGNC Symbol;Acc:HGNC:3017]	chr1	93345907	93369493	1	p22.1	36.44	protein_coding	10925
1.89e-05	0.000135	53.96	108.57	2.01205	209187_at	DR1	ENSG00000117505	down-regulator of transcription 1 [Source:HGNC Symbol;Acc:HGNC:3017]	chr1	93345907	93369493	1	p22.1	36.44	protein_coding	10925
0.0043556	0.0127	1190.53	539.07	0.452798	204363_at	F3	ENSG00000117525	coagulation factor III, tissue factor [Source:HGNC Symbol;Acc:HGNC:3541]	chr1	94529173	94541759	-1	p21.3	43.36	protein_coding	2886
0.0091298	0.0234	205.54	147.07	0.71553	202850_at	ABCD3	ENSG00000117528	ATP binding cassette subfamily D member 3 [Source:HGNC Symbol;Acc:HGNC:67]	chr1	94418389	94518666	1	p21.3	37.07	protein_coding	7655
0.0096422	0.0245	13.62	22.12	1.62408	211760_s_at	VAMP4	ENSG00000117533	vesicle associated membrane protein 4 [Source:HGNC Symbol;Acc:HGNC:12645]	chr1	171700160	171742074	-1	q24.3	36.59	protein_coding	4986
8.1e-05	0.000455	8.34	31.03	3.72062	207426_s_at	TNFSF4	ENSG00000117586	TNF superfamily member 4 [Source:HGNC Symbol;Acc:HGNC:11934]	chr1	173183731	173207331	-1	q25.1	39.89	protein_coding	3963
< 1e-07	< 1e-07	6.4	16.76	2.61875	218365_s_at	DARS2	ENSG00000117593	aspartyl-tRNA synthetase 2, mitochondrial [Source:HGNC Symbol;Acc:HGNC:25538]	chr1	173824653	173858808	1	q25.1	40.57	protein_coding	7353
0.0002178	0.00105	1193.55	684.18	0.573231	202597_at	IRF6	ENSG00000117595	interferon regulatory factor 6 [Source:HGNC Symbol;Acc:HGNC:6121]	chr1	209785617	209806175	-1	q32.2	44.95	protein_coding	4971
0.0005605	0.00231	29.57	52.73	1.78323	204699_s_at	UTP25	ENSG00000117597	UTP25 small subunit processor component [Source:HGNC Symbol;Acc:HGNC:28440]	chr1	209827972	209857565	1	q32.2	41.46	protein_coding	10411
0.0001194	0.000635	504.91	198.88	0.393892	226272_at	RCAN3	ENSG00000117602	RCAN family member 3 [Source:HGNC Symbol;Acc:HGNC:3042]	chr1	24502351	24541040	1	p36.11	42.26	protein_coding	7138
0.0048577	0.0139	186.72	107.2	0.574122	229064_s_at	RCAN3	ENSG00000117602	RCAN family member 3 [Source:HGNC Symbol;Acc:HGNC:3042]	chr1	24502351	24541040	1	p36.11	42.26	protein_coding	7138
0.0061783	0.017	1075.06	761.9	0.708705	222605_at	RCOR3	ENSG00000117625	REST corepressor 3 [Source:HGNC Symbol;Acc:HGNC:25594]	chr1	211258377	211316385	1	q32.2	37.38	protein_coding	9092
0.0087854	0.0227	10	23.91	2.391	1552803_a_at	STMN1	ENSG00000117632	stathmin 1 [Source:HGNC Symbol;Acc:HGNC:6510]	chr1	25884181	25906991	-1	p36.11	48.24	protein_coding	6247
< 1e-07	< 1e-07	37.24	370.02	9.93609	200783_s_at	STMN1	ENSG00000117632	stathmin 1 [Source:HGNC Symbol;Acc:HGNC:6510]	chr1	25884181	25906991	-1	p36.11	48.24	protein_coding	6247
0.0002513	0.00118	18.52	58.1	3.13715	204641_at	NEK2	ENSG00000117650	NIMA related kinase 2 [Source:HGNC Symbol;Acc:HGNC:7745]	chr1	211658657	211675630	-1	q32.3	39.5	protein_coding	3095
0.0048239	0.0138	56.79	93.46	1.64571	218547_at	DHDDS	ENSG00000117682	dehydrodolichyl diphosphate synthase subunit [Source:HGNC Symbol;Acc:HGNC:20603]	chr1	26432282	26471306	1	p36.11	45.46	protein_coding	5608
< 1e-07	< 1e-07	11.5	112.07	9.74522	207828_s_at	CENPF	ENSG00000117724	centromere protein F [Source:HGNC Symbol;Acc:HGNC:1857]	chr1	214603195	214664571	1	q41	40.92	protein_coding	11673
< 1e-07	< 1e-07	13.51	89.05	6.59141	209172_s_at	CENPF	ENSG00000117724	centromere protein F [Source:HGNC Symbol;Acc:HGNC:1857]	chr1	214603195	214664571	1	q41	40.92	protein_coding	11673
0.0083737	0.0218	61.61	83.51	1.35546	201756_at	RPA2	ENSG00000117748	replication protein A2 [Source:HGNC Symbol;Acc:HGNC:10290]	chr1	27891524	27914746	-1	p35.3	44.15	protein_coding	1981
0.0049656	0.0142	417.38	605.68	1.45115	207830_s_at	PPP1R8	ENSG00000117751	protein phosphatase 1 regulatory subunit 8 [Source:HGNC Symbol;Acc:HGNC:9296]	chr1	27830782	27851676	1	p35.3	44.43	protein_coding	2815
0.0003718	0.00164	821.13	483.04	0.588263	212111_at	STX12	ENSG00000117758	syntaxin 12 [Source:HGNC Symbol;Acc:HGNC:11430]	chr1	27773219	27824443	1	p35.3	41.39	protein_coding	3801
2.46e-05	0.000168	6.23	12.23	1.96308	206364_at	KIF14	ENSG00000118193	kinesin family member 14 [Source:HGNC Symbol;Acc:HGNC:19181]	chr1	200551497	200620751	-1	q32.1	37.83	protein_coding	7294
< 1e-07	< 1e-07	11.28	142.19	12.6055	236641_at	KIF14	ENSG00000118193	kinesin family member 14 [Source:HGNC Symbol;Acc:HGNC:19181]	chr1	200551497	200620751	-1	q32.1	37.83	protein_coding	7294
3.9e-05	0.000246	21.36	40.98	1.91854	212763_at	CAMSAP2	ENSG00000118200	calmodulin regulated spectrin associated protein family member 2 [Source:HGNC Symbol;Acc:HGNC:29188]	chr1	200739558	200860704	1	q32.1	37.69	protein_coding	7777
0.0036881	0.0111	37.74	71.93	1.90594	217196_s_at	CAMSAP2	ENSG00000118200	calmodulin regulated spectrin associated protein family member 2 [Source:HGNC Symbol;Acc:HGNC:29188]	chr1	200739558	200860704	1	q32.1	37.69	protein_coding	7777
7.37e-05	0.00042	25.39	46.52	1.83222	203952_at	ATF6	ENSG00000118217	activating transcription factor 6 [Source:HGNC Symbol;Acc:HGNC:791]	chr1	161766298	161977574	1	q23.3	37.99	protein_coding	14263
2.72e-05	0.000183	11.97	28.67	2.39515	219490_s_at	DCLRE1B	ENSG00000118655	DNA cross-link repair 1B [Source:HGNC Symbol;Acc:HGNC:17641]	chr1	113905213	113914086	1	p13.2	45.51	protein_coding	3868
0.0004551	0.00194	14.79	30.12	2.03651	222889_at	DCLRE1B	ENSG00000118655	DNA cross-link repair 1B [Source:HGNC Symbol;Acc:HGNC:17641]	chr1	113905213	113914086	1	p13.2	45.51	protein_coding	3868
4.3e-06	3.9e-05	16.09	37.99	2.36109	202374_s_at	RAB3GAP2	ENSG00000118873	RAB3 GTPase activating non-catalytic protein subunit 2 [Source:HGNC Symbol;Acc:HGNC:17168]	chr1	220148293	220272453	-1	q41	37.8	protein_coding	10343
0.0027294	0.00862	124.26	197.07	1.58595	223063_at	C1orf198	ENSG00000119280	chromosome 1 open reading frame 198 [Source:HGNC Symbol;Acc:HGNC:25900]	chr1	230837119	230869589	-1	q42.2	47.8	protein_coding	5161
0.0001251	0.00066	70.14	143.56	2.04676	218594_at	HEATR1	ENSG00000119285	HEAT repeat containing 1 [Source:HGNC Symbol;Acc:HGNC:25517]	chr1	236549005	236604516	-1	q43	38.52	protein_coding	9061
1e-06	1.17e-05	37.88	121.65	3.21146	203800_s_at	MRPS14	ENSG00000120333	mitochondrial ribosomal protein S14 [Source:HGNC Symbol;Acc:HGNC:14049]	chr1	175010789	175023425	-1	q25.1	40.16	protein_coding	2594
8e-07	9.64e-06	15.25	33.72	2.21115	232065_x_at	CENPL	ENSG00000120334	centromere protein L [Source:HGNC Symbol;Acc:HGNC:17879]	chr1	173799550	173824883	-1	q25.1	40.79	protein_coding	5165
4.32e-05	0.000268	5.63	12.93	2.29663	1554271_a_at	CENPL	ENSG00000120334	centromere protein L [Source:HGNC Symbol;Acc:HGNC:17879]	chr1	173799550	173824883	-1	q25.1	40.79	protein_coding	5165
1.2e-06	1.36e-05	30.25	74.52	2.46347	209463_s_at	TAF12	ENSG00000120656	TATA-box binding protein associated factor 12 [Source:HGNC Symbol;Acc:HGNC:11545]	chr1	28589323	28643085	-1	p35.3	47.17	protein_coding	2337
0.0033871	0.0103	12.04	18.41	1.52907	219131_at	UBIAD1	ENSG00000120942	UbiA prenyltransferase domain containing 1 [Source:HGNC Symbol;Acc:HGNC:30791]	chr1	11273198	11296049	1	p36.22	48.22	protein_coding	5090
0.0073423	0.0196	44.44	74.82	1.68362	1558208_at	TARDBP	ENSG00000120948	TAR DNA binding protein [Source:HGNC Symbol;Acc:HGNC:11571]	chr1	11012344	11030528	1	p36.22	43.2	protein_coding	6187
3.2e-06	3.07e-05	409.22	203.46	0.49719	218552_at	ECHDC2	ENSG00000121310	enoyl-CoA hydratase domain containing 2 [Source:HGNC Symbol;Acc:HGNC:23408]	chr1	52895910	52927212	-1	p32.3	47.09	protein_coding	11572
4.6e-06	4.13e-05	183.12	74.44	0.406509	235305_s_at	ECHDC2	ENSG00000121310	enoyl-CoA hydratase domain containing 2 [Source:HGNC Symbol;Acc:HGNC:23408]	chr1	52895910	52927212	-1	p32.3	47.09	protein_coding	11572
0.0011451	0.00418	262.98	140.51	0.534299	220992_s_at	TRMT1L	ENSG00000121486	tRNA methyltransferase 1 like [Source:HGNC Symbol;Acc:HGNC:16782]	chr1	185118101	185157072	-1	q25.3	35.55	protein_coding	4914
5.45e-05	0.000325	198.1	364.62	1.84059	212371_at	DESI2	ENSG00000121644	desumoylating isopeptidase 2 [Source:HGNC Symbol;Acc:HGNC:24264]	chr1	244653103	244709033	1	q44	40.31	protein_coding	4936
0.0001531	0.00078	855.5	1249.81	1.46091	200040_at	KHDRBS1	ENSG00000121774	KH RNA binding domain containing, signal transduction associated 1 [Source:HGNC Symbol;Acc:HGNC:18116]	chr1	32013868	32060850	1	p35.2	43.61	protein_coding	3544
0.0069928	0.0188	12.45	18.11	1.45462	218770_s_at	TMEM39B	ENSG00000121775	transmembrane protein 39B [Source:HGNC Symbol;Acc:HGNC:25510]	chr1	32072031	32102866	1	p35.2	48.85	protein_coding	2787
5.2e-05	0.000312	18.36	39.5	2.15142	225536_at	TMEM54	ENSG00000121900	transmembrane protein 54 [Source:HGNC Symbol;Acc:HGNC:24143]	chr1	32894594	32901438	-1	p35.1	57.33	protein_coding	1417
0.0002558	0.0012	39.94	62.19	1.55709	220235_s_at	LRIF1	ENSG00000121931	ligand dependent nuclear receptor interacting factor 1 [Source:HGNC Symbol;Acc:HGNC:30299]	chr1	110947190	110963965	-1	p13.3	36.39	protein_coding	3502
3e-07	4.21e-06	171.68	406.85	2.36982	213628_at	CLCC1	ENSG00000121940	chloride channel CLIC like 1 [Source:HGNC Symbol;Acc:HGNC:29675]	chr1	108927361	108963504	-1	p13.3	41.62	protein_coding	10933
2e-07	2.96e-06	169.91	405.63	2.38732	221922_at	GPSM2	ENSG00000121957	G protein signaling modulator 2 [Source:HGNC Symbol;Acc:HGNC:29501]	chr1	108875350	108934545	1	p13.3	38.78	protein_coding	19578
0.0009754	0.00367	56.59	23.81	0.420746	202709_at	FMOD	ENSG00000122176	fibromodulin [Source:HGNC Symbol;Acc:HGNC:3774]	chr1	203340628	203351758	-1	q32.1	50.22	protein_coding	3034
5e-07	6.53e-06	16.39	9.09	0.554606	237420_at	ODF2L	ENSG00000122417	outer dense fiber of sperm tails 2 like [Source:HGNC Symbol;Acc:HGNC:29225]	chr1	86346824	86396342	-1	p22.3	34.88	protein_coding	10898
0.0001176	0.000627	48.12	25.67	0.533458	231909_x_at	ODF2L	ENSG00000122417	outer dense fiber of sperm tails 2 like [Source:HGNC Symbol;Acc:HGNC:29225]	chr1	86346824	86396342	-1	p22.3	34.88	protein_coding	10898
0.0007685	0.00301	50.07	34.06	0.680248	230926_s_at	ODF2L	ENSG00000122417	outer dense fiber of sperm tails 2 like [Source:HGNC Symbol;Acc:HGNC:29225]	chr1	86346824	86396342	-1	p22.3	34.88	protein_coding	10898
< 1e-07	< 1e-07	493.85	134.41	0.272168	228577_x_at	ODF2L	ENSG00000122417	outer dense fiber of sperm tails 2 like [Source:HGNC Symbol;Acc:HGNC:29225]	chr1	86346824	86396342	-1	p22.3	34.88	protein_coding	10898
0.0001015	0.000553	61.01	29.21	0.478774	221057_at	SPATA1	ENSG00000122432	spermatogenesis associated 1 [Source:HGNC Symbol;Acc:HGNC:14682]	chr1	84506300	84566194	1	p22.3	36.11	protein_coding	4280
0.0022776	0.00742	40.69	21.09	0.518309	232489_at	TRMT13	ENSG00000122435	tRNA methyltransferase 13 homolog [Source:HGNC Symbol;Acc:HGNC:25502]	chr1	100133150	100150498	1	p21.2	35.8	protein_coding	4134
0.0004258	0.00184	262.95	426.68	1.62267	222580_at	ZNF644	ENSG00000122482	zinc finger protein 644 [Source:HGNC Symbol;Acc:HGNC:29222]	chr1	90915298	91022272	-1	p22.2	36.39	protein_coding	7604
0.0009921	0.00372	281.71	502.39	1.78336	224729_s_at	ATPAF1	ENSG00000123472	ATP synthase mitochondrial F1 complex assembly factor 1 [Source:HGNC Symbol;Acc:HGNC:18803]	chr1	46632737	46673867	-1	p33	41.86	protein_coding	5677
1.92e-05	0.000137	88.23	447.76	5.07492	205339_at	STIL	ENSG00000123473	STIL centriolar assembly protein [Source:HGNC Symbol;Acc:HGNC:10879]	chr1	47250139	47314892	-1	p33	40.15	protein_coding	7821
6e-06	5.13e-05	128.07	40.15	0.3135	213524_s_at	G0S2	ENSG00000123689	G0/G1 switch 2 [Source:HGNC Symbol;Acc:HGNC:30229]	chr1	209675412	209676390	1	q32.2	57.61	protein_coding	876
1.14e-05	8.86e-05	183.64	393.23	2.14131	200039_s_at	PSMB2	ENSG00000126067	proteasome 20S subunit beta 2 [Source:HGNC Symbol;Acc:HGNC:9539]	chr1	35599541	35641526	-1	p34.3	40.99	protein_coding	4528
0.0011408	0.00417	11.76	22.02	1.87245	219426_at	AGO3	ENSG00000126070	argonaute RISC catalytic component 3 [Source:HGNC Symbol;Acc:HGNC:18421]	chr1	35930718	36072500	1	p34.3	38.75	protein_coding	21153
5e-07	6.53e-06	21.06	47.12	2.23742	204415_at	IFI6	ENSG00000126709	interferon alpha inducible protein 6 [Source:HGNC Symbol;Acc:HGNC:4054]	chr1	27666064	27672212	-1	p35.3	50.06	protein_coding	936
5e-06	4.41e-05	8.6	15.6	1.81395	232437_at	INTS11	ENSG00000127054	integrator complex subunit 11 [Source:HGNC Symbol;Acc:HGNC:26052]	chr1	1311585	1324687	-1	p36.33	60.44	protein_coding	8216
0.0011796	0.00428	6.87	17.88	2.60262	244764_at	HIVEP3	ENSG00000127124	HIVEP zinc finger 3 [Source:HGNC Symbol;Acc:HGNC:13561]	chr1	41506365	42035925	-1	p34.2	46.45	protein_coding	14625
0.0033563	0.0102	6.28	10.5	1.67197	235122_at	HIVEP3	ENSG00000127124	HIVEP zinc finger 3 [Source:HGNC Symbol;Acc:HGNC:13561]	chr1	41506365	42035925	-1	p34.2	46.45	protein_coding	14625
< 1e-07	< 1e-07	15.97	288.27	18.0507	220011_at	AUNIP	ENSG00000127423	aurora kinase A and ninein interacting protein [Source:HGNC Symbol;Acc:HGNC:28363]	chr1	25831913	25859458	-1	p36.11	42.54	protein_coding	2408
0.0007079	0.00281	98.07	176.39	1.79861	212395_s_at	EMC1	ENSG00000127463	ER membrane protein complex subunit 1 [Source:HGNC Symbol;Acc:HGNC:28957]	chr1	19215660	19251527	-1	p36.13	46.61	protein_coding	9602
0.0025356	0.00811	33.13	63.34	1.91186	212396_s_at	EMC1	ENSG00000127463	ER membrane protein complex subunit 1 [Source:HGNC Symbol;Acc:HGNC:28957]	chr1	19215660	19251527	-1	p36.13	46.61	protein_coding	9602
0.0048805	0.014	16.53	24.92	1.50756	227818_at	CEP85	ENSG00000130695	centrosomal protein 85 [Source:HGNC Symbol;Acc:HGNC:25309]	chr1	26234200	26278808	1	p36.11	44.68	protein_coding	5145
5.4e-06	4.69e-05	946.05	1535.11	1.62265	212904_at	LRRC47	ENSG00000130764	leucine rich repeat containing 47 [Source:HGNC Symbol;Acc:HGNC:29207]	chr1	3778559	3796498	-1	p36.32	54.7	protein_coding	4509
0.001241	0.00447	334.27	566.82	1.6957	223339_at	ATP5IF1	ENSG00000130770	ATP synthase inhibitory factor subunit 1 [Source:HGNC Symbol;Acc:HGNC:871]	chr1	28236109	28246906	1	p35.3	44.37	protein_coding	2225
2.8e-06	2.74e-05	14.91	47.97	3.2173	210785_s_at	THEMIS2	ENSG00000130775	thymocyte selection associated family member 2 [Source:HGNC Symbol;Acc:HGNC:16839]	chr1	27872543	27886685	1	p35.3	54.04	protein_coding	4621
6.8e-06	5.7e-05	16.73	50.73	3.03228	207571_x_at	THEMIS2	ENSG00000130775	thymocyte selection associated family member 2 [Source:HGNC Symbol;Acc:HGNC:16839]	chr1	27872543	27886685	1	p35.3	54.04	protein_coding	4621
1.99e-05	0.000141	17.38	40.98	2.35788	215533_s_at	UBE4B	ENSG00000130939	ubiquitination factor E4B [Source:HGNC Symbol;Acc:HGNC:12500]	chr1	10032832	10181239	1	p36.22	44.12	protein_coding	9237
0.0003479	0.00156	109.32	204.55	1.87111	226746_s_at	UBE4B	ENSG00000130939	ubiquitination factor E4B [Source:HGNC Symbol;Acc:HGNC:12500]	chr1	10032832	10181239	1	p36.22	44.12	protein_coding	9237
0.0038619	0.0115	25.31	63.94	2.52627	202316_x_at	UBE4B	ENSG00000130939	ubiquitination factor E4B [Source:HGNC Symbol;Acc:HGNC:12500]	chr1	10032832	10181239	1	p36.22	44.12	protein_coding	9237
0.0091795	0.0235	68.95	123.76	1.79492	210685_s_at	UBE4B	ENSG00000130939	ubiquitination factor E4B [Source:HGNC Symbol;Acc:HGNC:12500]	chr1	10032832	10181239	1	p36.22	44.12	protein_coding	9237
1.7e-06	1.81e-05	125.02	68.06	0.544393	235605_at	CASZ1	ENSG00000130940	castor zinc finger 1 [Source:HGNC Symbol;Acc:HGNC:26002]	chr1	10636604	10796650	-1	p36.22	56.73	protein_coding	11336
0.0011606	0.00422	579.66	331.53	0.571939	243386_at	CASZ1	ENSG00000130940	castor zinc finger 1 [Source:HGNC Symbol;Acc:HGNC:26002]	chr1	10636604	10796650	-1	p36.22	56.73	protein_coding	11336
1.28e-05	9.77e-05	789.73	1317.08	1.66776	200625_s_at	CAP1	ENSG00000131236	cyclase associated actin cytoskeleton regulatory protein 1 [Source:HGNC Symbol;Acc:HGNC:20040]	chr1	40040233	40072649	1	p34.2	43.27	protein_coding	3814
< 1e-07	< 1e-07	93.61	280.09	2.99209	200975_at	PPT1	ENSG00000131238	palmitoyl-protein thioesterase 1 [Source:HGNC Symbol;Acc:HGNC:9325]	chr1	40072710	40097260	-1	p34.2	43.84	protein_coding	3372
0.0057992	0.0161	445.59	295.16	0.662403	203035_s_at	PIAS3	ENSG00000131788	protein inhibitor of activated STAT 3 [Source:HGNC Symbol;Acc:HGNC:16861]	chr1	145848522	145859836	-1	q21.1	52.28	protein_coding	4806
0.0027446	0.00866	7.06	11.77	1.66714	1558027_s_at	PRKAB2	ENSG00000131791	protein kinase AMP-activated non-catalytic subunit beta 2 [Source:HGNC Symbol;Acc:HGNC:9379]	chr1	147155106	147172550	-1	q21.1	39.83	protein_coding	5460
1.05e-05	8.27e-05	30.81	10.24	0.33236	220299_at	SPATA6	ENSG00000132122	spermatogenesis associated 6 [Source:HGNC Symbol;Acc:HGNC:18309]	chr1	48295373	48472208	-1	p33	37.04	protein_coding	5938
0.0007276	0.00288	20.52	10.74	0.523392	220298_s_at	SPATA6	ENSG00000132122	spermatogenesis associated 6 [Source:HGNC Symbol;Acc:HGNC:18309]	chr1	48295373	48472208	-1	p33	37.04	protein_coding	5938
< 1e-07	< 1e-07	48.11	10.92	0.22698	242086_at	SPATA6	ENSG00000132122	spermatogenesis associated 6 [Source:HGNC Symbol;Acc:HGNC:18309]	chr1	48295373	48472208	-1	p33	37.04	protein_coding	5938
0.0060393	0.0167	379.57	262.7	0.692099	220081_x_at	HSD17B7	ENSG00000132196	hydroxysteroid 17-beta dehydrogenase 7 [Source:HGNC Symbol;Acc:HGNC:5215]	chr1	162790702	162812823	1	q23.3	39.34	protein_coding	4784
2.5e-06	2.5e-05	215.1	411	1.91074	208822_s_at	DAP3	ENSG00000132676	death associated protein 3 [Source:HGNC Symbol;Acc:HGNC:2673]	chr1	155687960	155739010	1	q22	44.89	protein_coding	4588
0.0016367	0.00562	350.13	519.12	1.48265	227608_at	DAP3	ENSG00000132676	death associated protein 3 [Source:HGNC Symbol;Acc:HGNC:2673]	chr1	155687960	155739010	1	q22	44.89	protein_coding	4588
0.0006268	0.00254	542.91	362.81	0.668269	243318_at	DCAF8	ENSG00000132716	DDB1 and CUL4 associated factor 8 [Source:HGNC Symbol;Acc:HGNC:24891]	chr1	160215715	160262549	-1	q23.2	42.25	protein_coding	7605
< 1e-07	1.6e-06	11.72	101.79	8.68515	209198_s_at	SYT11	ENSG00000132718	synaptotagmin 11 [Source:HGNC Symbol;Acc:HGNC:19239]	chr1	155859567	155885199	1	q22	46.48	protein_coding	5182
1.4e-06	1.54e-05	9.65	30.46	3.15648	209197_at	SYT11	ENSG00000132718	synaptotagmin 11 [Source:HGNC Symbol;Acc:HGNC:19239]	chr1	155859567	155885199	1	q22	46.48	protein_coding	5182
< 1e-07	< 1e-07	27.3	61.22	2.24249	204514_at	DPH2	ENSG00000132768	diphthamide biosynthesis 2 [Source:HGNC Symbol;Acc:HGNC:3004]	chr1	43970000	43973369	1	p34.1	56.05	protein_coding	2930
4.59e-05	0.000282	6.98	23.87	3.41977	229125_at	KANK4	ENSG00000132854	KN motif and ankyrin repeat domains 4 [Source:HGNC Symbol;Acc:HGNC:27263]	chr1	62236165	62319434	-1	p31.3	46.96	protein_coding	6814
0.0029855	0.00928	97.13	61.05	0.628539	203984_s_at	CASP9	ENSG00000132906	caspase 9 [Source:HGNC Symbol;Acc:HGNC:1511]	chr1	15490832	15526534	-1	p36.21	48.7	protein_coding	5269
< 1e-07	< 1e-07	84.91	308.89	3.63785	204484_at	PIK3C2B	ENSG00000133056	phosphatidylinositol-4-phosphate 3-kinase catalytic subunit type 2 beta [Source:HGNC Symbol;Acc:HGNC:8972]	chr1	204422628	204494805	-1	q32.1	49.38	protein_coding	10169
< 1e-07	< 1e-07	281.35	90.83	0.322836	225570_at	SLC41A1	ENSG00000133065	solute carrier family 41 member 1 [Source:HGNC Symbol;Acc:HGNC:19429]	chr1	205789094	205813748	-1	q32.1	50.84	protein_coding	6378
< 1e-07	< 1e-07	22.63	179.8	7.94521	209588_at	EPHB2	ENSG00000133216	EPH receptor B2 [Source:HGNC Symbol;Acc:HGNC:3393]	chr1	22710839	22921500	1	p36.12	51.95	protein_coding	12516
< 1e-07	< 1e-07	9.33	33.85	3.62808	209589_s_at	EPHB2	ENSG00000133216	EPH receptor B2 [Source:HGNC Symbol;Acc:HGNC:3393]	chr1	22710839	22921500	1	p36.12	51.95	protein_coding	12516
4.35e-05	0.000269	68.99	25.83	0.374402	204550_x_at	GSTM1	ENSG00000134184	glutathione S-transferase mu 1 [Source:HGNC Symbol;Acc:HGNC:4632]	chr1	109687814	109709039	1	p13.3	46.17	protein_coding	2512
4.53e-05	0.000279	76.02	34.86	0.458564	215333_x_at	GSTM1	ENSG00000134184	glutathione S-transferase mu 1 [Source:HGNC Symbol;Acc:HGNC:4632]	chr1	109687814	109709039	1	p13.3	46.17	protein_coding	2512
0.0009713	0.00365	95.6	36.71	0.383996	227236_at	TSPAN2	ENSG00000134198	tetraspanin 2 [Source:HGNC Symbol;Acc:HGNC:20659]	chr1	115048011	115089503	-1	p13.2	43.45	protein_coding	3413
0.0012661	0.00454	15.5	6.25	0.403226	205752_s_at	GSTM5	ENSG00000134201	glutathione S-transferase mu 5 [Source:HGNC Symbol;Acc:HGNC:4637]	chr1	109711780	109775428	1	p13.3	48.99	protein_coding	6067
0.0001141	0.000612	7.85	29.04	3.69936	218806_s_at	VAV3	ENSG00000134215	vav guanine nucleotide exchange factor 3 [Source:HGNC Symbol;Acc:HGNC:12659]	chr1	107571161	107965180	-1	p13.3	37.54	protein_coding	7306
0.0076729	0.0203	24.91	71.61	2.87475	218807_at	VAV3	ENSG00000134215	vav guanine nucleotide exchange factor 3 [Source:HGNC Symbol;Acc:HGNC:12659]	chr1	107571161	107965180	-1	p13.3	37.54	protein_coding	7306
< 1e-07	< 1e-07	9.13	45.69	5.00438	201896_s_at	PSRC1	ENSG00000134222	proline and serine rich coiled-coil 1 [Source:HGNC Symbol;Acc:HGNC:24472]	chr1	109279556	109283186	-1	p13.3	53.65	protein_coding	2855
0.0004963	0.00209	24.25	59.55	2.45567	212807_s_at	SORT1	ENSG00000134243	sortilin 1 [Source:HGNC Symbol;Acc:HGNC:11186]	chr1	109309568	109397918	-1	p13.3	42.26	protein_coding	9127
0.0003107	0.00141	63.77	153.7	2.41022	224950_at	PTGFRN	ENSG00000134247	prostaglandin F2 receptor inhibitor [Source:HGNC Symbol;Acc:HGNC:9601]	chr1	116909916	116990353	1	p13.1	44.25	protein_coding	6488
0.0033676	0.0103	260.15	147.56	0.567211	202445_s_at	NOTCH2	ENSG00000134250	notch receptor 2 [Source:HGNC Symbol;Acc:HGNC:7882]	chr1	119911553	120100779	-1	p12	40	protein_coding	19930
0.0013984	0.00493	274.97	181.64	0.660581	219375_at	CEPT1	ENSG00000134255	choline/ethanolamine phosphotransferase 1 [Source:HGNC Symbol;Acc:HGNC:24289]	chr1	111139627	111185104	1	p13.3	36.54	protein_coding	8418
0.0073132	0.0195	9.28	19.17	2.06573	224773_at	NAV1	ENSG00000134369	neuron navigator 1 [Source:HGNC Symbol;Acc:HGNC:15989]	chr1	201622885	201826969	1	q32.1	47.44	protein_coding	22453
0.0004249	0.00184	84.17	130.76	1.55352	218578_at	CDC73	ENSG00000134371	cell division cycle 73 [Source:HGNC Symbol;Acc:HGNC:16783]	chr1	193121983	193254815	1	q31.2	35.65	protein_coding	10512
0.0098557	0.025	77.73	137.62	1.77049	235196_at	CDC73	ENSG00000134371	cell division cycle 73 [Source:HGNC Symbol;Acc:HGNC:16783]	chr1	193121983	193254815	1	q31.2	35.65	protein_coding	10512
0.0058978	0.0164	37.45	65.94	1.76075	201821_s_at	TIMM17A	ENSG00000134375	translocase of inner mitochondrial membrane 17A [Source:HGNC Symbol;Acc:HGNC:17315]	chr1	201955503	201970664	1	q32.1	42.3	protein_coding	3504
4.43e-05	0.000274	114.96	207.71	1.8068	212048_s_at	YARS1	ENSG00000134684	tyrosyl-tRNA synthetase 1 [Source:HGNC Symbol;Acc:HGNC:12840]	chr1	32775237	32817380	-1	p35.1	45.93	protein_coding	9124
< 1e-07	< 1e-07	6.31	107.05	16.9651	221520_s_at	CDCA8	ENSG00000134690	cell division cycle associated 8 [Source:HGNC Symbol;Acc:HGNC:14629]	chr1	37692481	37709719	1	p34.3	45.77	protein_coding	2406
2.3e-06	2.34e-05	277.95	525.77	1.8916	201948_at	GNL2	ENSG00000134697	G protein nucleolar 2 [Source:HGNC Symbol;Acc:HGNC:29925]	chr1	37566816	37595937	-1	p34.3	42.78	protein_coding	5747
2e-07	2.96e-06	289.15	583.75	2.01885	226963_at	BTF3L4	ENSG00000134717	basic transcription factor 3 like 4 [Source:HGNC Symbol;Acc:HGNC:30547]	chr1	52056199	52090716	1	p32.3	41.13	protein_coding	5948
0.0017277	0.00589	173.17	363.11	2.09684	235819_at	BTF3L4	ENSG00000134717	basic transcription factor 3 like 4 [Source:HGNC Symbol;Acc:HGNC:30547]	chr1	52056199	52090716	1	p32.3	41.13	protein_coding	5948
1.5e-06	1.63e-05	33.09	84.86	2.56452	1553709_a_at	PRPF38A	ENSG00000134748	pre-mRNA processing factor 38A [Source:HGNC Symbol;Acc:HGNC:25930]	chr1	52404602	52420836	1	p32.3	41.36	protein_coding	5617
1.71e-05	0.000125	138.94	22.1	0.159061	202834_at	AGT	ENSG00000135744	angiotensinogen [Source:HGNC Symbol;Acc:HGNC:333]	chr1	230690776	230745576	-1	q42.2	46.85	protein_coding	12703
1.1e-05	8.6e-05	367.13	167.84	0.457168	204679_at	KCNK1	ENSG00000135750	potassium two pore domain channel subfamily K member 1 [Source:HGNC Symbol;Acc:HGNC:6272]	chr1	233614106	233672514	1	q42.2	42.07	protein_coding	3527
3.56e-05	0.000229	253.96	57.31	0.225665	1566465_at	KCNK1	ENSG00000135750	potassium two pore domain channel subfamily K member 1 [Source:HGNC Symbol;Acc:HGNC:6272]	chr1	233614106	233672514	1	q42.2	42.07	protein_coding	3527
5.19e-05	0.000312	63.28	139.54	2.20512	205284_at	URB2	ENSG00000135763	URB2 ribosome biogenesis homolog [Source:HGNC Symbol;Acc:HGNC:28967]	chr1	229626247	229660200	1	q42.13	43.58	protein_coding	5989
0.0014902	0.00521	84.15	154.17	1.83209	213654_at	TAF5L	ENSG00000135801	TATA-box binding protein associated factor 5 like [Source:HGNC Symbol;Acc:HGNC:17304]	chr1	229593121	229626047	-1	q42.13	41.92	protein_coding	6402
0.0014426	0.00507	24.41	48.39	1.98238	200648_s_at	GLUL	ENSG00000135821	glutamate-ammonia ligase [Source:HGNC Symbol;Acc:HGNC:4341]	chr1	182378098	182392206	-1	q25.3	46.71	protein_coding	12638
3e-07	4.21e-06	8.31	12.95	1.55836	214441_at	STX6	ENSG00000135823	syntaxin 6 [Source:HGNC Symbol;Acc:HGNC:11441]	chr1	180972712	181023121	-1	q25.3	40.71	protein_coding	6477
2.8e-06	2.74e-05	96.94	275.3	2.8399	212800_at	STX6	ENSG00000135823	syntaxin 6 [Source:HGNC Symbol;Acc:HGNC:11441]	chr1	180972712	181023121	-1	q25.3	40.71	protein_coding	6477
0.0003492	0.00156	102.88	156.44	1.52061	212799_at	STX6	ENSG00000135823	syntaxin 6 [Source:HGNC Symbol;Acc:HGNC:11441]	chr1	180972712	181023121	-1	q25.3	40.71	protein_coding	6477
0.0008553	0.00329	8.45	13.28	1.5716	1552618_at	STX6	ENSG00000135823	syntaxin 6 [Source:HGNC Symbol;Acc:HGNC:11441]	chr1	180972712	181023121	-1	q25.3	40.71	protein_coding	6477
0.008692	0.0225	130.3	69.04	0.529854	229285_at	RNASEL	ENSG00000135828	ribonuclease L [Source:HGNC Symbol;Acc:HGNC:10050]	chr1	182573634	182589256	-1	q25.3	41.52	protein_coding	6125
1.2e-06	1.36e-05	13.06	56.04	4.29096	240440_at	NPL	ENSG00000135838	N-acetylneuraminate pyruvate lyase [Source:HGNC Symbol;Acc:HGNC:16781]	chr1	182789293	182830384	1	q25.3	41.95	protein_coding	4975
1.67e-05	0.000122	8.96	36.17	4.03683	221210_s_at	NPL	ENSG00000135838	N-acetylneuraminate pyruvate lyase [Source:HGNC Symbol;Acc:HGNC:16781]	chr1	182789293	182830384	1	q25.3	41.95	protein_coding	4975
7.27e-05	0.000416	7.46	18.65	2.5	223405_at	NPL	ENSG00000135838	N-acetylneuraminate pyruvate lyase [Source:HGNC Symbol;Acc:HGNC:16781]	chr1	182789293	182830384	1	q25.3	41.95	protein_coding	4975
2.16e-05	0.000151	81.02	151.18	1.86596	216593_s_at	PIGC	ENSG00000135845	phosphatidylinositol glycan anchor biosynthesis class C [Source:HGNC Symbol;Acc:HGNC:8960]	chr1	172370189	172444086	-1	q24.3	38.22	protein_coding	5225
8.5e-06	6.89e-05	44.07	119.49	2.71137	200770_s_at	LAMC1	ENSG00000135862	laminin subunit gamma 1 [Source:HGNC Symbol;Acc:HGNC:6492]	chr1	183023420	183145592	1	q25.3	40.09	protein_coding	8446
3.26e-05	0.000213	165.64	318.84	1.9249	200843_s_at	EPRS1	ENSG00000136628	glutamyl-prolyl-tRNA synthetase 1 [Source:HGNC Symbol;Acc:HGNC:3418]	chr1	219968600	220046530	-1	q41	38.09	protein_coding	5323
0.0001604	0.000812	12.35	26.35	2.1336	200841_s_at	EPRS1	ENSG00000136628	glutamyl-prolyl-tRNA synthetase 1 [Source:HGNC Symbol;Acc:HGNC:3418]	chr1	219968600	220046530	-1	q41	38.09	protein_coding	5323
0.0001212	0.000643	46.36	11.88	0.256255	228724_at	TTLL7	ENSG00000137941	tubulin tyrosine ligase like 7 [Source:HGNC Symbol;Acc:HGNC:26242]	chr1	83865024	83999150	-1	p31.1	35.53	protein_coding	10547
0.0004846	0.00205	50.76	192.77	3.79768	204439_at	IFI44L	ENSG00000137959	interferon induced protein 44 like [Source:HGNC Symbol;Acc:HGNC:17817]	chr1	78619902	78646145	1	p31.1	34.5	protein_coding	11610
0.0067511	0.0183	337.19	594.45	1.76295	203910_at	ARHGAP29	ENSG00000137962	Rho GTPase activating protein 29 [Source:HGNC Symbol;Acc:HGNC:30207]	chr1	94148988	94275068	-1	p22.1	38.07	protein_coding	18370
0.0010127	0.00378	187.98	383.17	2.03836	214453_s_at	IFI44	ENSG00000137965	interferon induced protein 44 [Source:HGNC Symbol;Acc:HGNC:16938]	chr1	78649796	78664078	1	p31.1	35.31	protein_coding	2038
0.0034872	0.0106	72.45	174.63	2.41035	214059_at	IFI44	ENSG00000137965	interferon induced protein 44 [Source:HGNC Symbol;Acc:HGNC:16938]	chr1	78649796	78664078	1	p31.1	35.31	protein_coding	2038
0.0069479	0.0187	36.68	23.51	0.640949	244687_at	DBT	ENSG00000137992	dihydrolipoamide branched chain transacylase E2 [Source:HGNC Symbol;Acc:HGNC:2698]	chr1	100186919	100249834	-1	p21.2	39.15	protein_coding	11616
0.0002322	0.00111	19.1	31.09	1.62775	221643_s_at	RERE	ENSG00000142599	arginine-glutamic acid dipeptide repeats [Source:HGNC Symbol;Acc:HGNC:9965]	chr1	8352397	8848921	-1	p36.23	42.21	protein_coding	14112
< 1e-07	< 1e-07	69.15	10.96	0.158496	216807_at	CFAP74	ENSG00000142609	cilia and flagella associated protein 74 [Source:HGNC Symbol;Acc:HGNC:29368]	chr1	1921951	2003837	-1	p36.33	55.65	protein_coding	10422
1.68e-05	0.000123	119.51	13.45	0.112543	232424_at	PRDM16	ENSG00000142611	PR/SET domain 16 [Source:HGNC Symbol;Acc:HGNC:14000]	chr1	3069168	3438621	1	p36.32	57.58	protein_coding	9767
< 1e-07	1.6e-06	27.62	6.83	0.247285	1563961_at	FHAD1	ENSG00000142621	forkhead associated phosphopeptide binding domain 1 [Source:HGNC Symbol;Acc:HGNC:29408]	chr1	15236521	15400283	1	p36.21	47.43	protein_coding	13247
1.6e-06	1.73e-05	16.14	7.35	0.45539	1564635_a_at	FHAD1	ENSG00000142621	forkhead associated phosphopeptide binding domain 1 [Source:HGNC Symbol;Acc:HGNC:29408]	chr1	15236521	15400283	1	p36.21	47.43	protein_coding	13247
< 1e-07	< 1e-07	116.92	8.33	0.0712453	1563830_a_at	FHAD1	ENSG00000142621	forkhead associated phosphopeptide binding domain 1 [Source:HGNC Symbol;Acc:HGNC:29408]	chr1	15236521	15400283	1	p36.21	47.43	protein_coding	13247
0.0002218	0.00107	15.71	28.7	1.82686	226857_at	ARHGEF19	ENSG00000142632	Rho guanine nucleotide exchange factor 19 [Source:HGNC Symbol;Acc:HGNC:26604]	chr1	16197854	16212652	-1	p36.13	57.34	protein_coding	3788
0.0015802	0.00546	30.85	80.83	2.6201	1558915_a_at	PEX14	ENSG00000142655	peroxisomal biogenesis factor 14 [Source:HGNC Symbol;Acc:HGNC:8856]	chr1	10472288	10630758	1	p36.22	45.03	protein_coding	2932
1.3e-06	1.45e-05	9.54	26.86	2.81551	201118_at	PGD	ENSG00000142657	phosphogluconate dehydrogenase [Source:HGNC Symbol;Acc:HGNC:8891]	chr1	10398592	10420511	1	p36.22	47.54	protein_coding	3333
2.91e-05	0.000193	13.84	30.08	2.17341	212791_at	C1orf216	ENSG00000142686	chromosome 1 open reading frame 216 [Source:HGNC Symbol;Acc:HGNC:26800]	chr1	35713877	35718894	-1	p34.3	53.21	protein_coding	3049
3.4e-06	3.22e-05	137.43	60.71	0.441752	217929_s_at	KIAA0319L	ENSG00000142687	KIAA0319 like [Source:HGNC Symbol;Acc:HGNC:30071]	chr1	35433492	35557950	-1	p34.3	41.89	protein_coding	9619
7.15e-05	0.00041	38.04	19.33	0.508149	222468_at	KIAA0319L	ENSG00000142687	KIAA0319 like [Source:HGNC Symbol;Acc:HGNC:30071]	chr1	35433492	35557950	-1	p34.3	41.89	protein_coding	9619
0.0001459	0.00075	8.35	12.42	1.48743	220134_x_at	EVA1B	ENSG00000142694	eva-1 homolog B [Source:HGNC Symbol;Acc:HGNC:25558]	chr1	36322030	36324154	-1	p34.3	70.16	protein_coding	1242
0.0003692	0.00163	15.3	24.72	1.61569	221710_x_at	EVA1B	ENSG00000142694	eva-1 homolog B [Source:HGNC Symbol;Acc:HGNC:25558]	chr1	36322030	36324154	-1	p34.3	70.16	protein_coding	1242
0.0012296	0.00443	74.64	160.13	2.14536	201655_s_at	HSPG2	ENSG00000142798	heparan sulfate proteoglycan 2 [Source:HGNC Symbol;Acc:HGNC:5273]	chr1	21822244	21937310	-1	p36.12	56.09	protein_coding	18118
3.34e-05	0.000217	23.53	34.38	1.46111	210076_x_at	SERBP1	ENSG00000142864	SERPINE1 mRNA binding protein 1 [Source:HGNC Symbol;Acc:HGNC:17860]	chr1	67407810	67430415	-1	p31.3	38.87	protein_coding	7676
0.0002531	0.00119	177.97	341.2	1.91718	217725_x_at	SERBP1	ENSG00000142864	SERPINE1 mRNA binding protein 1 [Source:HGNC Symbol;Acc:HGNC:17860]	chr1	67407810	67430415	-1	p31.3	38.87	protein_coding	7676
0.0029094	0.00908	317.5	509.56	1.60491	210466_s_at	SERBP1	ENSG00000142864	SERPINE1 mRNA binding protein 1 [Source:HGNC Symbol;Acc:HGNC:17860]	chr1	67407810	67430415	-1	p31.3	38.87	protein_coding	7676
0.0017979	0.00609	129.73	73.99	0.570338	227639_at	PIGK	ENSG00000142892	phosphatidylinositol glycan anchor biosynthesis class K [Source:HGNC Symbol;Acc:HGNC:8965]	chr1	77088989	77219430	-1	p31.1	35.84	protein_coding	5514
2e-07	2.96e-06	8.22	26.15	3.18127	209408_at	KIF2C	ENSG00000142945	kinesin family member 2C [Source:HGNC Symbol;Acc:HGNC:6393]	chr1	44739818	44767767	1	p34.1	49.08	protein_coding	3646
< 1e-07	< 1e-07	5.87	14.01	2.38671	211519_s_at	KIF2C	ENSG00000142945	kinesin family member 2C [Source:HGNC Symbol;Acc:HGNC:6393]	chr1	44739818	44767767	1	p34.1	49.08	protein_coding	3646
1.47e-05	0.00011	25.75	10.4	0.403883	1552296_at	BEST4	ENSG00000142959	bestrophin 4 [Source:HGNC Symbol;Acc:HGNC:17106]	chr1	44783585	44788170	-1	p34.1	58.83	protein_coding	2512
0.0009142	0.00348	14.04	28.9	2.0584	227066_at	MOB3C	ENSG00000142961	MOB kinase activator 3C [Source:HGNC Symbol;Acc:HGNC:29800]	chr1	46607715	46616884	-1	p33	54.39	protein_coding	5909
1.9e-05	0.000136	114.93	29.26	0.25459	210096_at	CYP4B1	ENSG00000142973	cytochrome P450 family 4 subfamily B member 1 [Source:HGNC Symbol;Acc:HGNC:2644]	chr1	46757838	46819413	1	p33	43.78	protein_coding	3466
0.0030751	0.00952	10.69	6.25	0.584659	1555497_a_at	CYP4B1	ENSG00000142973	cytochrome P450 family 4 subfamily B member 1 [Source:HGNC Symbol;Acc:HGNC:2644]	chr1	46757838	46819413	1	p33	43.78	protein_coding	3466
0.0033313	0.0102	64.16	104.88	1.63466	209205_s_at	LMO4	ENSG00000143013	LIM domain only 4 [Source:HGNC Symbol;Acc:HGNC:6644]	chr1	87328880	87348923	1	p22.3	41.87	protein_coding	5421
0.0001357	0.000706	10.23	23.92	2.33822	203347_s_at	MTF2	ENSG00000143033	metal response element binding transcription factor 2 [Source:HGNC Symbol;Acc:HGNC:29535]	chr1	93079235	93139079	1	p22.1	37.37	protein_coding	5907
0.000403	0.00176	28.5	64.13	2.25018	203345_s_at	MTF2	ENSG00000143033	metal response element binding transcription factor 2 [Source:HGNC Symbol;Acc:HGNC:29535]	chr1	93079235	93139079	1	p22.1	37.37	protein_coding	5907
0.0008846	0.00339	9.58	18.62	1.94363	209704_at	MTF2	ENSG00000143033	metal response element binding transcription factor 2 [Source:HGNC Symbol;Acc:HGNC:29535]	chr1	93079235	93139079	1	p22.1	37.37	protein_coding	5907
0.0004335	0.00187	82.71	37.75	0.456414	228221_at	SLC44A3	ENSG00000143036	solute carrier family 44 member 3 [Source:HGNC Symbol;Acc:HGNC:28689]	chr1	94820342	94895246	1	p21.3	43.92	protein_coding	2869
0.0040272	0.0119	38.99	98.02	2.51398	227080_at	ZNF697	ENSG00000143067	zinc finger protein 697 [Source:HGNC Symbol;Acc:HGNC:32034]	chr1	119619377	119648266	-1	p12	44.79	protein_coding	5579
1.53e-05	0.000114	23.21	58.36	2.51443	239525_at	CTTNBP2NL	ENSG00000143079	CTTNBP2 N-terminal like [Source:HGNC Symbol;Acc:HGNC:25330]	chr1	112396214	112463456	1	p13.2	39.6	protein_coding	7371
3.7e-06	3.46e-05	169.99	329.01	1.93547	201274_at	PSMA5	ENSG00000143106	proteasome 20S subunit alpha 5 [Source:HGNC Symbol;Acc:HGNC:9534]	chr1	109399042	109426448	-1	p13.3	40.76	protein_coding	5734
0.0001811	0.000898	216.42	76.6	0.353941	230300_at	PSMA5	ENSG00000143106	proteasome 20S subunit alpha 5 [Source:HGNC Symbol;Acc:HGNC:9534]	chr1	109399042	109426448	-1	p13.3	40.76	protein_coding	5734
4.4e-06	3.97e-05	213.04	50.24	0.235824	228532_at	C1orf162	ENSG00000143110	chromosome 1 open reading frame 162 [Source:HGNC Symbol;Acc:HGNC:28344]	chr1	111473792	111478512	1	p13.2	41.83	protein_coding	2768
0.0001553	0.00079	1106.35	612.62	0.553731	204029_at	CELSR2	ENSG00000143126	cadherin EGF LAG seven-pass G-type receptor 2 [Source:HGNC Symbol;Acc:HGNC:3231]	chr1	109249539	109275751	1	p13.3	60.19	protein_coding	12830
0.0002311	0.00111	685.41	388.66	0.567047	36499_at	CELSR2	ENSG00000143126	cadherin EGF LAG seven-pass G-type receptor 2 [Source:HGNC Symbol;Acc:HGNC:3231]	chr1	109249539	109275751	1	p13.3	60.19	protein_coding	12830
0.0036674	0.011	363.87	240.5	0.66095	201612_at	ALDH9A1	ENSG00000143149	aldehyde dehydrogenase 9 family member A1 [Source:HGNC Symbol;Acc:HGNC:412]	chr1	165662216	165698863	-1	q24.1	40.34	protein_coding	3308
0.0007283	0.00288	17.22	34.34	1.99419	1554351_a_at	TIPRL	ENSG00000143155	TOR signaling pathway regulator [Source:HGNC Symbol;Acc:HGNC:30231]	chr1	168178962	168202109	1	q24.2	38.53	protein_coding	3186
9.25e-05	0.000509	31.84	73.86	2.31972	218229_s_at	POGK	ENSG00000143157	pogo transposable element derived with KRAB domain [Source:HGNC Symbol;Acc:HGNC:18800]	chr1	166839447	166856359	1	q24.1	46.98	protein_coding	8463
0.0009822	0.00369	184.41	100.74	0.546283	227669_at	MPC2	ENSG00000143158	mitochondrial pyruvate carrier 2 [Source:HGNC Symbol;Acc:HGNC:24515]	chr1	167916675	167937072	-1	q24.2	37.94	protein_coding	2638
0.000256	0.0012	718.5	1119.53	1.55815	201200_at	CREG1	ENSG00000143162	cellular repressor of E1A stimulated genes 1 [Source:HGNC Symbol;Acc:HGNC:2351]	chr1	167529117	167553805	-1	q24.2	44.5	protein_coding	3286
0.0005799	0.00237	11.29	20.44	1.81045	225722_at	UCK2	ENSG00000143179	uridine-cytidine kinase 2 [Source:HGNC Symbol;Acc:HGNC:12562]	chr1	165827614	165911618	1	q24.1	44.2	protein_coding	6984
< 1e-07	< 1e-07	49.34	230.12	4.66396	209825_s_at	UCK2	ENSG00000143179	uridine-cytidine kinase 2 [Source:HGNC Symbol;Acc:HGNC:12562]	chr1	165827614	165911618	1	q24.1	44.2	protein_coding	6984
0.0006399	0.00258	7.26	18.86	2.5978	229380_at	ILDR2	ENSG00000143195	immunoglobulin like domain containing receptor 2 [Source:HGNC Symbol;Acc:HGNC:18131]	chr1	166895711	166975540	-1	q24.1	42.39	protein_coding	13946
0.0002037	0.000994	81.8	14.77	0.180562	213071_at	DPT	ENSG00000143196	dermatopontin [Source:HGNC Symbol;Acc:HGNC:3011]	chr1	168695468	168729206	-1	q24.2	42.19	protein_coding	1719
5.4e-06	4.69e-05	167.27	72.43	0.433012	204788_s_at	PPOX	ENSG00000143224	protoporphyrinogen oxidase [Source:HGNC Symbol;Acc:HGNC:9280]	chr1	161166056	161178013	1	q23.3	53.19	protein_coding	4725
< 1e-07	< 1e-07	6.57	58	8.82801	223381_at	NUF2	ENSG00000143228	NUF2 component of NDC80 kinetochore complex [Source:HGNC Symbol;Acc:HGNC:14621]	chr1	163266576	163355764	1	q23.3	36.44	protein_coding	3362
0.0003081	0.0014	183.9	54.25	0.294997	209071_s_at	RGS5	ENSG00000143248	regulator of G protein signaling 5 [Source:HGNC Symbol;Acc:HGNC:10001]	chr1	163111121	163321791	-1	q23.3	37.67	protein_coding	6624
0.0064182	0.0176	22.01	11.13	0.505679	230678_at	RGS5	ENSG00000143248	regulator of G protein signaling 5 [Source:HGNC Symbol;Acc:HGNC:10001]	chr1	163111121	163321791	-1	q23.3	37.67	protein_coding	6624
5.23e-05	0.000314	22.94	62.33	2.71709	216591_s_at	SDHC	ENSG00000143252	succinate dehydrogenase complex subunit C [Source:HGNC Symbol;Acc:HGNC:10682]	chr1	161314381	161363206	1	q23.3	42.31	protein_coding	1902
0.0007772	0.00304	153.47	263.83	1.7191	202004_x_at	SDHC	ENSG00000143252	succinate dehydrogenase complex subunit C [Source:HGNC Symbol;Acc:HGNC:10682]	chr1	161314381	161363206	1	q23.3	42.31	protein_coding	1902
0.0009058	0.00345	251.43	420.04	1.6706	210131_x_at	SDHC	ENSG00000143252	succinate dehydrogenase complex subunit C [Source:HGNC Symbol;Acc:HGNC:10682]	chr1	161314381	161363206	1	q23.3	42.31	protein_coding	1902
0.0029763	0.00926	832.85	1232.79	1.48021	215088_s_at	SDHC	ENSG00000143252	succinate dehydrogenase complex subunit C [Source:HGNC Symbol;Acc:HGNC:10682]	chr1	161314381	161363206	1	q23.3	42.31	protein_coding	1902
0.007355	0.0196	28	46.15	1.64821	238056_at	SDHC	ENSG00000143252	succinate dehydrogenase complex subunit C [Source:HGNC Symbol;Acc:HGNC:10682]	chr1	161314381	161363206	1	q23.3	42.31	protein_coding	1902
0.0007593	0.00298	109.3	191.59	1.75288	218336_at	PFDN2	ENSG00000143256	prefoldin subunit 2 [Source:HGNC Symbol;Acc:HGNC:8867]	chr1	161100556	161118055	-1	q23.3	44.06	protein_coding	621
3.4e-06	3.22e-05	30.72	62.14	2.02279	212766_s_at	ISG20L2	ENSG00000143319	interferon stimulated exonuclease gene 20 like 2 [Source:HGNC Symbol;Acc:HGNC:25745]	chr1	156721891	156728766	-1	q23.1	50.2	protein_coding	5229
1.7e-06	1.81e-05	56.6	282.49	4.99099	202575_at	CRABP2	ENSG00000143320	cellular retinoic acid binding protein 2 [Source:HGNC Symbol;Acc:HGNC:2339]	chr1	156699606	156705816	-1	q23.1	55.42	protein_coding	1082
4.9e-06	4.34e-05	706.21	1211.2	1.71507	200896_x_at	HDGF	ENSG00000143321	heparin binding growth factor [Source:HGNC Symbol;Acc:HGNC:4856]	chr1	156742109	156766925	-1	q23.1	51.35	protein_coding	3674
0.0013667	0.00484	11.87	22.92	1.93092	226615_at	XPR1	ENSG00000143324	xenotropic and polytropic retrovirus receptor 1 [Source:HGNC Symbol;Acc:HGNC:12827]	chr1	180632022	180890279	1	q25.3	36.94	protein_coding	8913
0.000146	0.00075	17.98	45.69	2.54116	209325_s_at	RGS16	ENSG00000143333	regulator of G protein signaling 16 [Source:HGNC Symbol;Acc:HGNC:9997]	chr1	182598623	182604389	-1	q25.3	50.79	protein_coding	2408
0.0051337	0.0145	7.96	18.88	2.37186	235944_at	HMCN1	ENSG00000143341	hemicentin 1 [Source:HGNC Symbol;Acc:HGNC:19194]	chr1	185734391	186190949	1	q25.3	35.99	protein_coding	18739
0.0003729	0.00165	410.4	207.59	0.505824	209568_s_at	RGL1	ENSG00000143344	ral guanine nucleotide dissociation stimulator like 1 [Source:HGNC Symbol;Acc:HGNC:30281]	chr1	183636085	183928532	1	q25.3	39.98	protein_coding	5306
8.54e-05	0.000475	10.87	21.83	2.00828	210988_s_at	PRUNE1	ENSG00000143363	prune exopolyphosphatase 1 [Source:HGNC Symbol;Acc:HGNC:13420]	chr1	151008420	151035713	1	q21.3	46.61	protein_coding	3156
0.0001573	0.000799	454.76	747.66	1.64408	209586_s_at	PRUNE1	ENSG00000143363	prune exopolyphosphatase 1 [Source:HGNC Symbol;Acc:HGNC:13420]	chr1	151008420	151035713	1	q21.3	46.61	protein_coding	3156
8.4e-06	6.82e-05	33.03	12.94	0.391765	228806_at	RORC	ENSG00000143365	RAR related orphan receptor C [Source:HGNC Symbol;Acc:HGNC:10260]	chr1	151806071	151831845	-1	q21.3	53.06	protein_coding	6517
5.7e-05	0.000338	277.86	493.54	1.77622	205807_s_at	TUFT1	ENSG00000143367	tuftelin 1 [Source:HGNC Symbol;Acc:HGNC:12422]	chr1	151540305	151583583	1	q21.3	45.93	protein_coding	3878
0.0073985	0.0197	30.72	41.23	1.34212	209044_x_at	SF3B4	ENSG00000143368	splicing factor 3b subunit 4 [Source:HGNC Symbol;Acc:HGNC:10771]	chr1	149923317	149927803	-1	q21.2	47.69	protein_coding	1704
0.0034124	0.0104	17.54	27.07	1.54333	221189_s_at	TARS2	ENSG00000143374	threonyl-tRNA synthetase 2, mitochondrial [Source:HGNC Symbol;Acc:HGNC:30740]	chr1	150487364	150507609	1	q21.2	48.52	protein_coding	4077
0.0010179	0.0038	17.84	46.69	2.61715	214197_s_at	SETDB1	ENSG00000143379	SET domain bifurcated histone lysine methyltransferase 1 [Source:HGNC Symbol;Acc:HGNC:10761]	chr1	150926263	150964744	1	q21.3	44.16	protein_coding	7093
2.9e-06	2.82e-05	135.04	440.12	3.25918	214056_at	MCL1	ENSG00000143384	MCL1 apoptosis regulator, BCL2 family member [Source:HGNC Symbol;Acc:HGNC:6943]	chr1	150560895	150579738	-1	q21.2	47.56	protein_coding	6222
3.2e-06	3.07e-05	66.33	223.53	3.36997	200798_x_at	MCL1	ENSG00000143384	MCL1 apoptosis regulator, BCL2 family member [Source:HGNC Symbol;Acc:HGNC:6943]	chr1	150560895	150579738	-1	q21.2	47.56	protein_coding	6222
1.6e-06	1.73e-05	8.1	21.76	2.68642	202964_s_at	RFX5	ENSG00000143390	regulatory factor X5 [Source:HGNC Symbol;Acc:HGNC:9986]	chr1	151340640	151347326	-1	q21.3	49.71	protein_coding	4555
3.1e-06	2.99e-05	1213.21	2293.8	1.89069	202963_at	RFX5	ENSG00000143390	regulatory factor X5 [Source:HGNC Symbol;Acc:HGNC:9986]	chr1	151340640	151347326	-1	q21.3	49.71	protein_coding	4555
0.0066237	0.018	25.34	36.82	1.45304	206138_s_at	PI4KB	ENSG00000143393	phosphatidylinositol 4-kinase beta [Source:HGNC Symbol;Acc:HGNC:8984]	chr1	151291797	151327715	-1	q21.3	48.46	protein_coding	5456
0.0003813	0.00168	275.85	413.63	1.49947	207391_s_at	PIP5K1A	ENSG00000143398	phosphatidylinositol-4-phosphate 5-kinase type 1 alpha [Source:HGNC Symbol;Acc:HGNC:8994]	chr1	151197949	151249536	1	q21.3	45.21	protein_coding	5405
8e-07	9.64e-06	263.35	545.19	2.07021	221505_at	ANP32E	ENSG00000143401	acidic nuclear phosphoprotein 32 family member E [Source:HGNC Symbol;Acc:HGNC:16673]	chr1	150218417	150236156	-1	q21.2	42.62	protein_coding	3605
1.8e-05	0.00013	24.46	59.08	2.41537	208103_s_at	ANP32E	ENSG00000143401	acidic nuclear phosphoprotein 32 family member E [Source:HGNC Symbol;Acc:HGNC:16673]	chr1	150218417	150236156	-1	q21.2	42.62	protein_coding	3605
0.0001259	0.000663	83.56	253.02	3.028	229128_s_at	ANP32E	ENSG00000143401	acidic nuclear phosphoprotein 32 family member E [Source:HGNC Symbol;Acc:HGNC:16673]	chr1	150218417	150236156	-1	q21.2	42.62	protein_coding	3605
0.0001843	0.000912	996.89	1507.19	1.51189	202596_at	ENSA	ENSG00000143420	endosulfine alpha [Source:HGNC Symbol;Acc:HGNC:3360]	chr1	150600851	150629612	-1	q21.3	45.32	protein_coding	4619
0.008986	0.0231	85.18	180.27	2.11634	228851_s_at	ENSA	ENSG00000143420	endosulfine alpha [Source:HGNC Symbol;Acc:HGNC:3360]	chr1	150600851	150629612	-1	q21.3	45.32	protein_coding	4619
< 1e-07	< 1e-07	8.16	24.02	2.94363	228852_at	ENSA	ENSG00000143420	endosulfine alpha [Source:HGNC Symbol;Acc:HGNC:3360]	chr1	150600851	150629612	-1	q21.3	45.32	protein_coding	4619
2.75e-05	0.000185	154.38	284.85	1.84512	211594_s_at	MRPL9	ENSG00000143436	mitochondrial ribosomal protein L9 [Source:HGNC Symbol;Acc:HGNC:14277]	chr1	151759647	151763496	-1	q21.3	47.92	protein_coding	1740
0.0086553	0.0224	1103.01	803.6	0.728552	212153_at	POGZ	ENSG00000143442	pogo transposable element derived with ZNF domain [Source:HGNC Symbol;Acc:HGNC:18801]	chr1	151402724	151459494	-1	q21.3	41.8	protein_coding	10301
< 1e-07	< 1e-07	9.8	28.41	2.89898	213863_s_at	OAZ3	ENSG00000143450	ornithine decarboxylase antizyme 3 [Source:HGNC Symbol;Acc:HGNC:8097]	chr1	151762899	151771334	1	q21.3	48.79	protein_coding	4633
< 1e-07	< 1e-07	11.36	147.68	13	218585_s_at	DTL	ENSG00000143476	denticleless E3 ubiquitin protein ligase homolog [Source:HGNC Symbol;Acc:HGNC:30288]	chr1	212035553	212107400	1	q32.3	38.44	protein_coding	4923
< 1e-07	< 1e-07	4.96	14.5	2.92339	222680_s_at	DTL	ENSG00000143476	denticleless E3 ubiquitin protein ligase homolog [Source:HGNC Symbol;Acc:HGNC:30288]	chr1	212035553	212107400	1	q32.3	38.44	protein_coding	4923
0.0001597	0.000809	28.16	89.03	3.16158	222250_s_at	INTS7	ENSG00000143493	integrator complex subunit 7 [Source:HGNC Symbol;Acc:HGNC:24484]	chr1	211940399	212035557	-1	q32.3	38.12	protein_coding	5326
4.87e-05	0.000296	7.49	16.59	2.21495	235343_at	VASH2	ENSG00000143494	vasohibin 2 [Source:HGNC Symbol;Acc:HGNC:25723]	chr1	212950520	212992037	1	q32.3	48.23	protein_coding	9086
0.0003657	0.00162	19.75	64	3.24051	219740_at	VASH2	ENSG00000143494	vasohibin 2 [Source:HGNC Symbol;Acc:HGNC:25723]	chr1	212950520	212992037	1	q32.3	48.23	protein_coding	9086
0.0002565	0.0012	216.53	127.25	0.587678	212922_s_at	SMYD2	ENSG00000143499	SET and MYND domain containing 2 [Source:HGNC Symbol;Acc:HGNC:20982]	chr1	214281102	214337131	1	q32.3	43.58	protein_coding	4889
0.0033785	0.0103	17.74	10.54	0.594138	212921_at	SMYD2	ENSG00000143499	SET and MYND domain containing 2 [Source:HGNC Symbol;Acc:HGNC:20982]	chr1	214281102	214337131	1	q32.3	43.58	protein_coding	4889
< 1e-07	1.6e-06	5.47	33.22	6.07313	223821_s_at	SUSD4	ENSG00000143502	sushi domain containing 4 [Source:HGNC Symbol;Acc:HGNC:25470]	chr1	223220819	223364233	-1	q41	44.24	protein_coding	5336
1e-06	1.17e-05	8.82	32.7	3.70748	223822_at	SUSD4	ENSG00000143502	sushi domain containing 4 [Source:HGNC Symbol;Acc:HGNC:25470]	chr1	223220819	223364233	-1	q41	44.24	protein_coding	5336
0.000356	0.00158	12.86	42.68	3.31882	219389_at	SUSD4	ENSG00000143502	sushi domain containing 4 [Source:HGNC Symbol;Acc:HGNC:25470]	chr1	223220819	223364233	-1	q41	44.24	protein_coding	5336
0.0003892	0.00171	6.65	49.24	7.40451	202917_s_at	S100A8	ENSG00000143546	S100 calcium binding protein A8 [Source:HGNC Symbol;Acc:HGNC:10498]	chr1	153390032	153391073	-1	q21.3	53.84	protein_coding	891
0.0011891	0.00431	5.88	28.72	4.88435	214370_at	S100A8	ENSG00000143546	S100 calcium binding protein A8 [Source:HGNC Symbol;Acc:HGNC:10498]	chr1	153390032	153391073	-1	q21.3	53.84	protein_coding	891
2.4e-06	2.41e-05	52.84	96.23	1.82116	201378_s_at	UBAP2L	ENSG00000143569	ubiquitin associated protein 2 like [Source:HGNC Symbol;Acc:HGNC:29877]	chr1	154220179	154271510	1	q21.3	43.58	protein_coding	7503
0.005917	0.0164	245.27	351.83	1.43446	201145_at	HAX1	ENSG00000143575	HCLS1 associated protein X-1 [Source:HGNC Symbol;Acc:HGNC:16915]	chr1	154272589	154275875	1	q21.3	49.8	protein_coding	2077
2e-07	2.96e-06	29.05	6.01	0.206885	244040_at	KCNN3	ENSG00000143603	potassium calcium-activated channel subfamily N member 3 [Source:HGNC Symbol;Acc:HGNC:6292]	chr1	154697455	154870281	-1	q21.3	48.86	protein_coding	13599
8e-07	9.64e-06	38.3	9.46	0.246997	205902_at	KCNN3	ENSG00000143603	potassium calcium-activated channel subfamily N member 3 [Source:HGNC Symbol;Acc:HGNC:6292]	chr1	154697455	154870281	-1	q21.3	48.86	protein_coding	13599
1.7e-06	1.81e-05	20.85	9.04	0.433573	231103_at	KCNN3	ENSG00000143603	potassium calcium-activated channel subfamily N member 3 [Source:HGNC Symbol;Acc:HGNC:6292]	chr1	154697455	154870281	-1	q21.3	48.86	protein_coding	13599
8.9e-06	7.16e-05	88.72	328.12	3.69838	1555226_s_at	C1orf43	ENSG00000143612	chromosome 1 open reading frame 43 [Source:HGNC Symbol;Acc:HGNC:29876]	chr1	154206696	154220637	-1	q21.3	45.86	protein_coding	2670
0.0025452	0.00814	18.31	45.68	2.49481	1555225_at	C1orf43	ENSG00000143612	chromosome 1 open reading frame 43 [Source:HGNC Symbol;Acc:HGNC:29876]	chr1	154206696	154220637	-1	q21.3	45.86	protein_coding	2670
0.0004742	0.00201	747.33	1162.58	1.55564	223034_s_at	C1orf43	ENSG00000143612	chromosome 1 open reading frame 43 [Source:HGNC Symbol;Acc:HGNC:29876]	chr1	154206696	154220637	-1	q21.3	45.86	protein_coding	2670
< 1e-07	< 1e-07	130.22	387.61	2.97658	200052_s_at	ILF2	ENSG00000143621	interleukin enhancer binding factor 2 [Source:HGNC Symbol;Acc:HGNC:6037]	chr1	153661788	153671028	-1	q21.3	44.32	protein_coding	2261
2e-07	2.96e-06	40.44	129.26	3.19634	239843_at	RIT1	ENSG00000143622	Ras like without CAAX 1 [Source:HGNC Symbol;Acc:HGNC:10023]	chr1	155897808	155911404	-1	q22	43.8	protein_coding	4038
7e-07	8.64e-06	68.71	149	2.16853	236223_s_at	RIT1	ENSG00000143622	Ras like without CAAX 1 [Source:HGNC Symbol;Acc:HGNC:10023]	chr1	155897808	155911404	-1	q22	43.8	protein_coding	4038
4.8e-06	4.28e-05	143.71	295.08	2.0533	243463_s_at	RIT1	ENSG00000143622	Ras like without CAAX 1 [Source:HGNC Symbol;Acc:HGNC:10023]	chr1	155897808	155911404	-1	q22	43.8	protein_coding	4038
2.04e-05	0.000144	239.62	427.52	1.78416	236224_at	RIT1	ENSG00000143622	Ras like without CAAX 1 [Source:HGNC Symbol;Acc:HGNC:10023]	chr1	155897808	155911404	-1	q22	43.8	protein_coding	4038
0.0014073	0.00496	93.39	193.77	2.07485	222078_at	PKLR	ENSG00000143627	pyruvate kinase L/R [Source:HGNC Symbol;Acc:HGNC:9020]	chr1	155289293	155301438	-1	q22	52.36	protein_coding	3168
0.0022439	0.00733	61.26	126.18	2.05975	228741_s_at	HCN3	ENSG00000143630	hyperpolarization activated cyclic nucleotide gated potassium channel 3 [Source:HGNC Symbol;Acc:HGNC:19183]	chr1	155277463	155289848	1	q22	53.94	protein_coding	4241
0.0003521	0.00157	10.61	19.47	1.83506	217787_s_at	GALNT2	ENSG00000143641	polypeptide N-acetylgalactosaminyltransferase 2 [Source:HGNC Symbol;Acc:HGNC:4124]	chr1	230057990	230282122	1	q42.13	45.94	protein_coding	7712
0.0034779	0.0105	20.84	39.64	1.90211	223991_s_at	GALNT2	ENSG00000143641	polypeptide N-acetylgalactosaminyltransferase 2 [Source:HGNC Symbol;Acc:HGNC:4124]	chr1	230057990	230282122	1	q42.13	45.94	protein_coding	7712
0.0060791	0.0168	49.06	76.41	1.55748	219481_at	TTC13	ENSG00000143643	tetratricopeptide repeat domain 13 [Source:HGNC Symbol;Acc:HGNC:26204]	chr1	230906243	230978875	-1	q42.2	39.73	protein_coding	4212
0.0001896	0.000934	277.85	163.14	0.587151	201826_s_at	SCCPDH	ENSG00000143653	saccharopine dehydrogenase (putative) [Source:HGNC Symbol;Acc:HGNC:24275]	chr1	246724409	246768137	1	q44	41.65	protein_coding	2141
0.0036247	0.0109	50.38	74.43	1.47737	225244_at	SNAP47	ENSG00000143740	synaptosome associated protein 47 [Source:HGNC Symbol;Acc:HGNC:30669]	chr1	227728200	227781826	1	q42.13	54.21	protein_coding	10190
0.0002919	0.00134	675.47	1165.01	1.72474	201273_s_at	SRP9	ENSG00000143742	signal recognition particle 9 [Source:HGNC Symbol;Acc:HGNC:11304]	chr1	225777813	225790468	1	q42.12	40.6	protein_coding	2220
2.5e-06	2.5e-05	24.86	67	2.69509	202272_s_at	FBXO28	ENSG00000143756	F-box protein 28 [Source:HGNC Symbol;Acc:HGNC:29046]	chr1	224114111	224162047	1	q42.11	40.96	protein_coding	6020
0.0001106	0.000595	44.91	100.01	2.2269	1555971_s_at	FBXO28	ENSG00000143756	F-box protein 28 [Source:HGNC Symbol;Acc:HGNC:29046]	chr1	224114111	224162047	1	q42.11	40.96	protein_coding	6020
0.0065394	0.0178	98.51	152.79	1.55101	202271_at	FBXO28	ENSG00000143756	F-box protein 28 [Source:HGNC Symbol;Acc:HGNC:29046]	chr1	224114111	224162047	1	q42.11	40.96	protein_coding	6020
3.3e-06	3.14e-05	86.01	218.73	2.54308	223993_s_at	CNIH4	ENSG00000143771	cornichon family AMPA receptor auxiliary protein 4 [Source:HGNC Symbol;Acc:HGNC:25013]	chr1	224356858	224379459	1	q42.11	43.2	protein_coding	5090
6.4e-06	5.41e-05	176.1	413.16	2.34617	218728_s_at	CNIH4	ENSG00000143771	cornichon family AMPA receptor auxiliary protein 4 [Source:HGNC Symbol;Acc:HGNC:25013]	chr1	224356858	224379459	1	q42.11	43.2	protein_coding	5090
0.0072394	0.0194	7.8	11.75	1.50641	228306_at	CNIH4	ENSG00000143771	cornichon family AMPA receptor auxiliary protein 4 [Source:HGNC Symbol;Acc:HGNC:25013]	chr1	224356858	224379459	1	q42.11	43.2	protein_coding	5090
< 1e-07	< 1e-07	55.27	9.26	0.167541	222721_at	CNIH4	ENSG00000143771	cornichon family AMPA receptor auxiliary protein 4 [Source:HGNC Symbol;Acc:HGNC:25013]	chr1	224356858	224379459	1	q42.11	43.2	protein_coding	5090
5e-07	6.53e-06	15.84	44.24	2.79293	213621_s_at	GUK1	ENSG00000143774	guanylate kinase 1 [Source:HGNC Symbol;Acc:HGNC:4693]	chr1	228139962	228148984	1	q42.13	61.76	protein_coding	4725
6e-07	7.62e-06	70.06	162.19	2.31502	200075_s_at	GUK1	ENSG00000143774	guanylate kinase 1 [Source:HGNC Symbol;Acc:HGNC:4693]	chr1	228139962	228148984	1	q42.13	61.76	protein_coding	4725
9.72e-05	0.000533	14.33	32.6	2.27495	213595_s_at	CDC42BPA	ENSG00000143776	CDC42 binding protein kinase alpha [Source:HGNC Symbol;Acc:HGNC:1737]	chr1	226989865	227318502	-1	q42.13	36.66	protein_coding	14243
4e-07	5.38e-06	45.62	115.39	2.52937	208644_at	PARP1	ENSG00000143799	poly(ADP-ribose) polymerase 1 [Source:HGNC Symbol;Acc:HGNC:270]	chr1	226360210	226408154	-1	q42.12	46.86	protein_coding	18399
0.0001244	0.000657	10.89	27.82	2.55464	214978_s_at	PPFIA4	ENSG00000143847	PTPRF interacting protein alpha 4 [Source:HGNC Symbol;Acc:HGNC:9248]	chr1	203026498	203078740	1	q32.1	52.65	protein_coding	9707
0.0006263	0.00254	37.81	14.45	0.382174	229245_at	PLEKHA6	ENSG00000143850	pleckstrin homology domain containing A6 [Source:HGNC Symbol;Acc:HGNC:17053]	chr1	204218853	204377665	-1	q32.1	48.91	protein_coding	9656
7.1e-06	5.9e-05	14.19	34.95	2.463	216950_s_at	FCGR1A	ENSG00000150337	Fc fragment of IgG receptor Ia [Source:HGNC Symbol;Acc:HGNC:3613]	chr1	149782671	149791675	1	q21.2	42.01	protein_coding	2155
3e-07	4.21e-06	1292.5	449.02	0.347404	203020_at	RABGAP1L	ENSG00000152061	RAB GTPase activating protein 1 like [Source:HGNC Symbol;Acc:HGNC:24663]	chr1	174159410	174995308	1	q25.1	37.91	protein_coding	16071
3.59e-05	0.00023	286.46	111.29	0.388501	213982_s_at	RABGAP1L	ENSG00000152061	RAB GTPase activating protein 1 like [Source:HGNC Symbol;Acc:HGNC:24663]	chr1	174159410	174995308	1	q25.1	37.91	protein_coding	16071
0.0032958	0.0101	18.63	9.2	0.493827	215342_s_at	RABGAP1L	ENSG00000152061	RAB GTPase activating protein 1 like [Source:HGNC Symbol;Acc:HGNC:24663]	chr1	174159410	174995308	1	q25.1	37.91	protein_coding	16071
0.0007138	0.00283	93.57	39.65	0.423747	237515_at	TLCD4	ENSG00000152078	TLC domain containing 4 [Source:HGNC Symbol;Acc:HGNC:26477]	chr1	95117355	95197607	1	p21.3	38.99	protein_coding	7385
0.0006814	0.00272	60.02	13.45	0.224092	213197_at	ASTN1	ENSG00000152092	astrotactin 1 [Source:HGNC Symbol;Acc:HGNC:773]	chr1	176857302	177164973	-1	q25.2	41.64	protein_coding	9201
0.003592	0.0108	75.3	127.19	1.68911	226282_at	PTPN14	ENSG00000152104	protein tyrosine phosphatase non-receptor type 14 [Source:HGNC Symbol;Acc:HGNC:9647]	chr1	214348700	214552449	-1	q41	41.3	protein_coding	18752
0.0024766	0.00796	31.47	53.43	1.69781	225455_at	TADA1	ENSG00000152382	transcriptional adaptor 1 [Source:HGNC Symbol;Acc:HGNC:30631]	chr1	166856510	166876264	-1	q24.1	40.88	protein_coding	2900
< 1e-07	< 1e-07	426.24	7.66	0.0179711	1553635_s_at	DYNLT5	ENSG00000152760	dynein light chain Tctex-type family member 5 [Source:HGNC Symbol;Acc:HGNC:26882]	chr1	66752459	66779047	1	p31.3	37.26	protein_coding	3360
< 1e-07	< 1e-07	62.57	12.07	0.192904	220769_s_at	DNAI4	ENSG00000152763	dynein axonemal intermediate chain 4 [Source:HGNC Symbol;Acc:HGNC:26252]	chr1	66812885	66924856	-1	p31.3	36.43	protein_coding	6673
< 1e-07	< 1e-07	116.22	12.66	0.108931	1554141_s_at	DNAI4	ENSG00000152763	dynein axonemal intermediate chain 4 [Source:HGNC Symbol;Acc:HGNC:26252]	chr1	66812885	66924856	-1	p31.3	36.43	protein_coding	6673
< 1e-07	< 1e-07	165.31	11.29	0.0682959	1554140_at	DNAI4	ENSG00000152763	dynein axonemal intermediate chain 4 [Source:HGNC Symbol;Acc:HGNC:26252]	chr1	66812885	66924856	-1	p31.3	36.43	protein_coding	6673
< 1e-07	< 1e-07	298.08	15.03	0.0504227	229816_at	DNAI4	ENSG00000152763	dynein axonemal intermediate chain 4 [Source:HGNC Symbol;Acc:HGNC:26252]	chr1	66812885	66924856	-1	p31.3	36.43	protein_coding	6673
0.0082745	0.0216	14.32	8.43	0.588687	235352_at	MR1	ENSG00000153029	major histocompatibility complex, class I-related [Source:HGNC Symbol;Acc:HGNC:4975]	chr1	181033374	181061938	1	q25.3	46.09	protein_coding	9441
1.3e-06	1.45e-05	223.46	430.56	1.92679	200593_s_at	HNRNPU	ENSG00000153187	heterogeneous nuclear ribonucleoprotein U [Source:HGNC Symbol;Acc:HGNC:5048]	chr1	244840638	244864560	-1	q44	38.67	protein_coding	22512
0.0007404	0.00292	159.92	89.91	0.562219	235603_at	HNRNPU	ENSG00000153187	heterogeneous nuclear ribonucleoprotein U [Source:HGNC Symbol;Acc:HGNC:5048]	chr1	244840638	244864560	-1	q44	38.67	protein_coding	22512
< 1e-07	< 1e-07	1284.95	424.34	0.330239	209094_at	DDAH1	ENSG00000153904	dimethylarginine dimethylaminohydrolase 1 [Source:HGNC Symbol;Acc:HGNC:2715]	chr1	85318481	85578363	-1	p22.3	39.19	protein_coding	4587
1.3e-06	1.45e-05	13.14	32.7	2.48858	203283_s_at	HS2ST1	ENSG00000153936	heparan sulfate 2-O-sulfotransferase 1 [Source:HGNC Symbol;Acc:HGNC:5193]	chr1	86914635	87109982	1	p22.3	36.82	protein_coding	7426
0.0001904	0.000938	172.02	68.7	0.399372	212310_at	MIA3	ENSG00000154305	MIA SH3 domain ER export factor 3 [Source:HGNC Symbol;Acc:HGNC:24008]	chr1	222618097	222668007	1	q41	39.14	protein_coding	10155
7.67e-05	0.000435	27.33	65.59	2.39993	225904_at	CCSAP	ENSG00000154429	centriole, cilia and spindle associated protein [Source:HGNC Symbol;Acc:HGNC:29578]	chr1	229321011	229343294	-1	q42.13	43.58	protein_coding	6257
0.001419	0.005	42.96	97.55	2.27072	229625_at	GBP5	ENSG00000154451	guanylate binding protein 5 [Source:HGNC Symbol;Acc:HGNC:19895]	chr1	89258950	89272804	-1	p22.2	38.29	protein_coding	8143
0.0050679	0.0144	10.97	19.71	1.79672	238581_at	GBP5	ENSG00000154451	guanylate binding protein 5 [Source:HGNC Symbol;Acc:HGNC:19895]	chr1	89258950	89272804	-1	p22.2	38.29	protein_coding	8143
4.7e-05	0.000288	17.86	34.79	1.94793	200885_at	PPM1J	ENSG00000155367	protein phosphatase, Mg2+/Mn2+ dependent 1J [Source:HGNC Symbol;Acc:HGNC:20785]	chr1	112709994	112715477	-1	p13.2	58.3	protein_coding	2874
2.7e-06	2.66e-05	13.47	58.55	4.3467	202235_at	SLC16A1	ENSG00000155380	solute carrier family 16 member 1 [Source:HGNC Symbol;Acc:HGNC:10922]	chr1	112911847	112957593	-1	p13.2	40.9	protein_coding	6347
9.6e-06	7.66e-05	33.42	94.33	2.82256	202236_s_at	SLC16A1	ENSG00000155380	solute carrier family 16 member 1 [Source:HGNC Symbol;Acc:HGNC:10922]	chr1	112911847	112957593	-1	p13.2	40.9	protein_coding	6347
2.92e-05	0.000194	121.02	291.95	2.41241	209900_s_at	SLC16A1	ENSG00000155380	solute carrier family 16 member 1 [Source:HGNC Symbol;Acc:HGNC:10922]	chr1	112911847	112957593	-1	p13.2	40.9	protein_coding	6347
< 1e-07	< 1e-07	133.2	8.42	0.0632132	233516_s_at	SPAG17	ENSG00000155761	sperm associated antigen 17 [Source:HGNC Symbol;Acc:HGNC:26620]	chr1	117953590	118185228	-1	p12	37.52	protein_coding	9828
< 1e-07	< 1e-07	34.09	8.13	0.238486	223618_at	FMN2	ENSG00000155816	formin 2 [Source:HGNC Symbol;Acc:HGNC:14074]	chr1	240014348	240475187	1	q43	39.28	protein_coding	18429
4e-07	5.38e-06	1017.37	519.02	0.510159	225228_at	DRAM2	ENSG00000156171	DNA damage regulated autophagy modulator 2 [Source:HGNC Symbol;Acc:HGNC:28769]	chr1	111117163	111140203	-1	p13.3	37.87	protein_coding	3295
0.00022	0.00106	244.48	149.77	0.612606	225230_at	DRAM2	ENSG00000156171	DNA damage regulated autophagy modulator 2 [Source:HGNC Symbol;Acc:HGNC:28769]	chr1	111117163	111140203	-1	p13.3	37.87	protein_coding	3295
2.4e-06	2.41e-05	14.23	37.86	2.66058	205282_at	LRP8	ENSG00000157193	LDL receptor related protein 8 [Source:HGNC Symbol;Acc:HGNC:6700]	chr1	53242364	53328469	-1	p32.3	51.87	protein_coding	19668
5.2e-06	4.55e-05	38.72	90.77	2.34427	208433_s_at	LRP8	ENSG00000157193	LDL receptor related protein 8 [Source:HGNC Symbol;Acc:HGNC:6700]	chr1	53242364	53328469	-1	p32.3	51.87	protein_coding	19668
4.63e-05	0.000284	52.13	108.84	2.08786	223635_s_at	SSBP3	ENSG00000157216	single stranded DNA binding protein 3 [Source:HGNC Symbol;Acc:HGNC:15674]	chr1	54225433	54413479	-1	p32.3	50.93	protein_coding	6954
0.0001981	0.00097	94.03	167.38	1.78007	217991_x_at	SSBP3	ENSG00000157216	single stranded DNA binding protein 3 [Source:HGNC Symbol;Acc:HGNC:15674]	chr1	54225433	54413479	-1	p32.3	50.93	protein_coding	6954
< 1e-07	< 1e-07	73.22	7.14	0.0975143	231549_at	C1orf158	ENSG00000157330	chromosome 1 open reading frame 158 [Source:HGNC Symbol;Acc:HGNC:28567]	chr1	12746200	12763699	1	p36.21	43.81	protein_coding	4133
8.1e-06	6.61e-05	58.71	114.97	1.95827	202296_s_at	RER1	ENSG00000157916	retention in endoplasmic reticulum sorting receptor 1 [Source:HGNC Symbol;Acc:HGNC:30309]	chr1	2391775	2405442	1	p36.32	53.96	protein_coding	5689
4.93e-05	0.000299	288.31	504.36	1.74937	213114_at	RER1	ENSG00000157916	retention in endoplasmic reticulum sorting receptor 1 [Source:HGNC Symbol;Acc:HGNC:30309]	chr1	2391775	2405442	1	p36.32	53.96	protein_coding	5689
0.0030711	0.00951	468.42	813.15	1.73594	202297_s_at	RER1	ENSG00000157916	retention in endoplasmic reticulum sorting receptor 1 [Source:HGNC Symbol;Acc:HGNC:30309]	chr1	2391775	2405442	1	p36.32	53.96	protein_coding	5689
0.0001058	0.000574	9.55	16.13	1.68901	221790_s_at	LDLRAP1	ENSG00000157978	low density lipoprotein receptor adaptor protein 1 [Source:HGNC Symbol;Acc:HGNC:18640]	chr1	25543606	25568886	1	p36.11	54.6	protein_coding	5371
< 1e-07	< 1e-07	171.7	33.21	0.193419	227716_at	UBXN11	ENSG00000158062	UBX domain protein 11 [Source:HGNC Symbol;Acc:HGNC:30600]	chr1	26281328	26318363	-1	p36.11	53.25	protein_coding	4704
0.0003167	0.00144	118.79	192.81	1.62312	226170_at	EYA3	ENSG00000158161	EYA transcriptional coactivator and phosphatase 3 [Source:HGNC Symbol;Acc:HGNC:3521]	chr1	27970344	28088637	-1	p35.3	39.51	protein_coding	6424
2.21e-05	0.000154	141.88	311.15	2.19305	233065_at	RNF207	ENSG00000158286	ring finger protein 207 [Source:HGNC Symbol;Acc:HGNC:32947]	chr1	6205475	6221299	1	p36.31	57.32	protein_coding	6595
0.003031	0.0094	6.34	11.76	1.85489	1552502_s_at	RHBDL2	ENSG00000158315	rhomboid like 2 [Source:HGNC Symbol;Acc:HGNC:16083]	chr1	38885807	38941830	-1	p34.3	44.61	protein_coding	2826
0.0003975	0.00174	237.62	423.35	1.78163	224692_at	PPP1R15B	ENSG00000158615	protein phosphatase 1 regulatory subunit 15B [Source:HGNC Symbol;Acc:HGNC:14951]	chr1	204403381	204411817	-1	q32.1	40.48	protein_coding	5259
2.4e-06	2.41e-05	50.56	119.74	2.36828	210978_s_at	TAGLN2	ENSG00000158710	transgelin 2 [Source:HGNC Symbol;Acc:HGNC:11554]	chr1	159918107	159925507	-1	q23.2	56.34	protein_coding	2262
0.0016692	0.00572	122.78	185.87	1.51385	200916_at	TAGLN2	ENSG00000158710	transgelin 2 [Source:HGNC Symbol;Acc:HGNC:11554]	chr1	159918107	159925507	-1	q23.2	56.34	protein_coding	2262
0.0005519	0.00228	6.29	10.14	1.61208	214831_at	ELK4	ENSG00000158711	ETS transcription factor ELK4 [Source:HGNC Symbol;Acc:HGNC:3326]	chr1	205597556	205632011	-1	q32.1	41.89	protein_coding	12191
2.56e-05	0.000174	9.53	30.18	3.16684	219386_s_at	SLAMF8	ENSG00000158714	SLAM family member 8 [Source:HGNC Symbol;Acc:HGNC:21391]	chr1	159826811	159837492	1	q23.2	49.57	protein_coding	3178
3.15e-05	0.000207	11.2	21.84	1.95	219385_at	SLAMF8	ENSG00000158714	SLAM family member 8 [Source:HGNC Symbol;Acc:HGNC:21391]	chr1	159826811	159837492	1	q23.2	49.57	protein_coding	3178
0.0001265	0.000666	32.45	72.79	2.24314	224097_s_at	F11R	ENSG00000158769	F11 receptor [Source:HGNC Symbol;Acc:HGNC:14685]	chr1	160995211	161021343	-1	q23.3	47.23	protein_coding	5061
0.000522	0.00218	10.69	17.13	1.60243	202480_s_at	DEDD	ENSG00000158796	death effector domain containing [Source:HGNC Symbol;Acc:HGNC:2755]	chr1	161120974	161132688	-1	q23.3	46.36	protein_coding	2821
0.0075997	0.0201	109.68	159.88	1.4577	201966_at	NDUFS2	ENSG00000158864	NADH:ubiquinone oxidoreductase core subunit S2 [Source:HGNC Symbol;Acc:HGNC:7708]	chr1	161197104	161214723	1	q23.3	49.67	protein_coding	8898
0.0002414	0.00114	21.45	87.41	4.07506	1554899_s_at	FCER1G	ENSG00000158869	Fc fragment of IgE receptor Ig [Source:HGNC Symbol;Acc:HGNC:3611]	chr1	161215234	161220699	1	q23.3	49.29	protein_coding	964
0.0013809	0.00488	134.99	512.17	3.79413	204232_at	FCER1G	ENSG00000158869	Fc fragment of IgE receptor Ig [Source:HGNC Symbol;Acc:HGNC:3611]	chr1	161215234	161220699	1	q23.3	49.29	protein_coding	964
3.16e-05	0.000207	17.13	44.99	2.62639	226059_at	TOMM40L	ENSG00000158882	translocase of outer mitochondrial membrane 40 like [Source:HGNC Symbol;Acc:HGNC:25756]	chr1	161225939	161230746	1	q23.3	52.75	protein_coding	3291
9.6e-05	0.000527	1832.99	974.03	0.531389	225627_s_at	CACHD1	ENSG00000158966	cache domain containing 1 [Source:HGNC Symbol;Acc:HGNC:29314]	chr1	64470129	64693058	1	p31.3	40.03	protein_coding	7022
0.0013227	0.00471	87.66	39.48	0.450376	234888_at	CACHD1	ENSG00000158966	cache domain containing 1 [Source:HGNC Symbol;Acc:HGNC:29314]	chr1	64470129	64693058	1	p31.3	40.03	protein_coding	7022
0.0026806	0.00849	291.65	457.55	1.56883	225051_at	EPB41	ENSG00000159023	erythrocyte membrane protein band 4.1 [Source:HGNC Symbol;Acc:HGNC:3377]	chr1	28887091	29120046	1	p35.3	41.87	protein_coding	19993
0.0019666	0.00656	11.35	18.43	1.62379	203287_at	LAD1	ENSG00000159166	ladinin 1 [Source:HGNC Symbol;Acc:HGNC:6472]	chr1	201380833	201399915	-1	q32.1	54.89	protein_coding	3261
0.0012935	0.00462	27.82	73.5	2.64198	225353_s_at	C1QC	ENSG00000159189	complement C1q C chain [Source:HGNC Symbol;Acc:HGNC:1245]	chr1	22643633	22648110	1	p36.12	54.67	protein_coding	1332
0.0010332	0.00385	108.61	59.99	0.552343	202263_at	CYB5R1	ENSG00000159348	cytochrome b5 reductase 1 [Source:HGNC Symbol;Acc:HGNC:13397]	chr1	202961873	202967275	-1	q32.1	50.27	protein_coding	4495
8.3e-06	6.76e-05	476.24	836.37	1.75619	211609_x_at	PSMD4	ENSG00000159352	proteasome 26S subunit, non-ATPase 4 [Source:HGNC Symbol;Acc:HGNC:9561]	chr1	151254709	151267479	1	q21.3	47.67	protein_coding	3021
8.9e-06	7.16e-05	410.65	734.62	1.78892	210460_s_at	PSMD4	ENSG00000159352	proteasome 26S subunit, non-ATPase 4 [Source:HGNC Symbol;Acc:HGNC:9561]	chr1	151254709	151267479	1	q21.3	47.67	protein_coding	3021
0.0002736	0.00127	770.55	1186.63	1.53998	200882_s_at	PSMD4	ENSG00000159352	proteasome 26S subunit, non-ATPase 4 [Source:HGNC Symbol;Acc:HGNC:9561]	chr1	151254709	151267479	1	q21.3	47.67	protein_coding	3021
2e-07	2.96e-06	1256.66	2594.46	2.06457	202244_at	PSMB4	ENSG00000159377	proteasome 20S subunit beta 4 [Source:HGNC Symbol;Acc:HGNC:9541]	chr1	151399560	151401937	1	q21.3	49.12	protein_coding	2125
1.9e-06	1.99e-05	1325.37	3060.14	2.30889	202243_s_at	PSMB4	ENSG00000159377	proteasome 20S subunit beta 4 [Source:HGNC Symbol;Acc:HGNC:9541]	chr1	151399560	151401937	1	q21.3	49.12	protein_coding	2125
2.5e-06	2.5e-05	1037.09	2556.4	2.46497	228204_at	PSMB4	ENSG00000159377	proteasome 20S subunit beta 4 [Source:HGNC Symbol;Acc:HGNC:9541]	chr1	151399560	151401937	1	q21.3	49.12	protein_coding	2125
2.74e-05	0.000184	394.74	138.19	0.350079	201236_s_at	BTG2	ENSG00000159388	BTG anti-proliferation factor 2 [Source:HGNC Symbol;Acc:HGNC:1131]	chr1	203305491	203309602	1	q32.1	53.33	protein_coding	2757
0.000245	0.00116	12.19	5.61	0.460213	215045_at	CELF3	ENSG00000159409	CUGBP Elav-like family member 3 [Source:HGNC Symbol;Acc:HGNC:11967]	chr1	151700058	151716803	-1	q21.3	55.89	protein_coding	6774
8.33e-05	0.000465	14.33	32.92	2.29728	213126_at	MED8	ENSG00000159479	mediator complex subunit 8 [Source:HGNC Symbol;Acc:HGNC:19971]	chr1	43383917	43389808	-1	p34.2	46.78	protein_coding	2704
0.0029191	0.00911	201.74	372.53	1.84658	213127_s_at	MED8	ENSG00000159479	mediator complex subunit 8 [Source:HGNC Symbol;Acc:HGNC:19971]	chr1	43383917	43389808	-1	p34.2	46.78	protein_coding	2704
< 1e-07	< 1e-07	24.08	73.72	3.06146	213696_s_at	MED8	ENSG00000159479	mediator complex subunit 8 [Source:HGNC Symbol;Acc:HGNC:19971]	chr1	43383917	43389808	-1	p34.2	46.78	protein_coding	2704
< 1e-07	< 1e-07	436.29	11.4	0.0261294	236320_at	CCDC17	ENSG00000159588	coiled-coil domain containing 17 [Source:HGNC Symbol;Acc:HGNC:26574]	chr1	45620044	45624057	-1	p34.1	58.1	protein_coding	3323
0.0049174	0.014	41.97	64.95	1.54753	222452_s_at	GPBP1L1	ENSG00000159592	GC-rich promoter binding protein 1 like 1 [Source:HGNC Symbol;Acc:HGNC:28843]	chr1	45627304	45688113	-1	p34.1	41.19	protein_coding	7433
0.0030111	0.00935	277.69	406.83	1.46505	223335_at	TMEM69	ENSG00000159596	transmembrane protein 69 [Source:HGNC Symbol;Acc:HGNC:28035]	chr1	45688181	45694436	1	p34.1	43.75	protein_coding	1465
0.0010457	0.00388	223.24	380.48	1.70435	201776_s_at	EFCAB14	ENSG00000159658	EF-hand calcium binding domain 14 [Source:HGNC Symbol;Acc:HGNC:29051]	chr1	46674659	46719146	-1	p33	40.28	protein_coding	16312
0.0013547	0.0048	6.86	12.24	1.78426	223518_at	DFFA	ENSG00000160049	DNA fragmentation factor subunit alpha [Source:HGNC Symbol;Acc:HGNC:2772]	chr1	10456522	10472529	-1	p36.22	48.53	protein_coding	6625
< 1e-07	1.6e-06	79.6	25.53	0.320729	223676_at	TMEM234	ENSG00000160055	transmembrane protein 234 [Source:HGNC Symbol;Acc:HGNC:28837]	chr1	32214472	32222359	-1	p35.2	51.46	protein_coding	3571
2.31e-05	0.00016	17.9	8.61	0.481006	234006_s_at	TMEM234	ENSG00000160055	transmembrane protein 234 [Source:HGNC Symbol;Acc:HGNC:28837]	chr1	32214472	32222359	-1	p35.2	51.46	protein_coding	3571
2.59e-05	0.000175	8.9	16.11	1.81011	1552641_s_at	ATAD3B	ENSG00000160072	ATPase family AAA domain containing 3B [Source:HGNC Symbol;Acc:HGNC:24007]	chr1	1471765	1497848	1	p36.33	58.83	protein_coding	7686
< 1e-07	1.6e-06	33.77	85.53	2.53272	223052_x_at	SSU72	ENSG00000160075	SSU72 homolog, RNA polymerase II CTD phosphatase [Source:HGNC Symbol;Acc:HGNC:25016]	chr1	1541673	1574863	-1	p36.33	53.86	protein_coding	6919
2e-07	2.96e-06	57.75	181.39	3.14095	227244_s_at	SSU72	ENSG00000160075	SSU72 homolog, RNA polymerase II CTD phosphatase [Source:HGNC Symbol;Acc:HGNC:25016]	chr1	1541673	1574863	-1	p36.33	53.86	protein_coding	6919
< 1e-07	< 1e-07	103.38	235.74	2.28033	223053_x_at	SSU72	ENSG00000160075	SSU72 homolog, RNA polymerase II CTD phosphatase [Source:HGNC Symbol;Acc:HGNC:25016]	chr1	1541673	1574863	-1	p36.33	53.86	protein_coding	6919
0.0050359	0.0143	16.36	25.16	1.5379	230929_s_at	UBE2J2	ENSG00000160087	ubiquitin conjugating enzyme E2 J2 [Source:HGNC Symbol;Acc:HGNC:19268]	chr1	1253909	1273864	-1	p36.33	56.31	protein_coding	4691
0.0044137	0.0128	52.75	139.75	2.64929	205334_at	S100A1	ENSG00000160678	S100 calcium binding protein A1 [Source:HGNC Symbol;Acc:HGNC:10486]	chr1	153627926	153632039	1	q21.3	55.61	protein_coding	3030
0.0047333	0.0136	39.09	57.34	1.46687	209927_s_at	CHTOP	ENSG00000160679	chromatin target of PRMT1 [Source:HGNC Symbol;Acc:HGNC:24511]	chr1	153633982	153646306	1	q21.3	44.38	protein_coding	5625
1.7e-06	1.81e-05	7.57	12.64	1.66975	205661_s_at	FLAD1	ENSG00000160688	flavin adenine dinucleotide synthetase 1 [Source:HGNC Symbol;Acc:HGNC:24671]	chr1	154983338	154993111	1	q21.3	51.25	protein_coding	4019
0.0001383	0.000717	14.85	26.13	1.7596	212541_at	FLAD1	ENSG00000160688	flavin adenine dinucleotide synthetase 1 [Source:HGNC Symbol;Acc:HGNC:24671]	chr1	154983338	154993111	1	q21.3	51.25	protein_coding	4019
0.0006455	0.0026	124.36	187.86	1.51061	217978_s_at	UBE2Q1	ENSG00000160714	ubiquitin conjugating enzyme E2 Q1 [Source:HGNC Symbol;Acc:HGNC:15698]	chr1	154548577	154559028	-1	q21.3	50.99	protein_coding	4190
9e-07	1.07e-05	422.45	871.99	2.06413	201275_at	FDPS	ENSG00000160752	farnesyl diphosphate synthase [Source:HGNC Symbol;Acc:HGNC:3631]	chr1	155308748	155320666	1	q22	50.48	protein_coding	3718
5.54e-05	0.00033	20.86	40.89	1.96021	206949_s_at	RUSC1	ENSG00000160753	RUN and SH3 domain containing 1 [Source:HGNC Symbol;Acc:HGNC:17153]	chr1	155320894	155331114	1	q22	58.03	protein_coding	5429
2.1e-05	0.000148	27.79	57.73	2.07737	203550_s_at	FAM189B	ENSG00000160767	family with sequence similarity 189 member B [Source:HGNC Symbol;Acc:HGNC:1233]	chr1	155247205	155255483	-1	q22	57.4	protein_coding	4468
0.000338	0.00152	87.39	145.88	1.6693	224513_s_at	UBQLN4	ENSG00000160803	ubiquilin 4 [Source:HGNC Symbol;Acc:HGNC:1237]	chr1	156035299	156053798	-1	q22	50.71	protein_coding	3884
1e-07	1.6e-06	19.98	38.8	1.94194	224633_s_at	GPATCH4	ENSG00000160818	G-patch domain containing 4 [Source:HGNC Symbol;Acc:HGNC:25982]	chr1	156594301	156601496	-1	q23.1	48.5	protein_coding	4623
4.29e-05	0.000266	22.79	55.92	2.45371	224634_at	GPATCH4	ENSG00000160818	G-patch domain containing 4 [Source:HGNC Symbol;Acc:HGNC:25982]	chr1	156594301	156601496	-1	q23.1	48.5	protein_coding	4623
< 1e-07	< 1e-07	159.17	6.47	0.0406484	237251_at	LRRC71	ENSG00000160838	leucine rich repeat containing 71 [Source:HGNC Symbol;Acc:HGNC:26556]	chr1	156920632	156933094	1	q23.1	54.62	protein_coding	2649
1.5e-05	0.000112	387.02	680.7	1.75882	217870_s_at	CMPK1	ENSG00000162368	cytidine/uridine monophosphate kinase 1 [Source:HGNC Symbol;Acc:HGNC:18170]	chr1	47333790	47378839	1	p33	42.2	protein_coding	3851
1.5e-06	1.63e-05	26.47	86.85	3.28107	222883_at	COA7	ENSG00000162377	cytochrome c oxidase assembly factor 7 [Source:HGNC Symbol;Acc:HGNC:25716]	chr1	52684449	52698347	-1	p32.3	46	protein_coding	4148
0.0024828	0.00798	22.38	59.15	2.64298	219420_s_at	COA7	ENSG00000162377	cytochrome c oxidase assembly factor 7 [Source:HGNC Symbol;Acc:HGNC:25716]	chr1	52684449	52698347	-1	p32.3	46	protein_coding	4148
4e-07	5.38e-06	315.61	571.73	1.81151	225338_at	ZYG11B	ENSG00000162378	zyg-11 family member B, cell cycle regulator [Source:HGNC Symbol;Acc:HGNC:25820]	chr1	52726453	52827336	1	p32.3	41.29	protein_coding	8206
1.62e-05	0.000119	42.78	118.53	2.77069	210092_at	MAGOH	ENSG00000162385	mago homolog, exon junction complex subunit [Source:HGNC Symbol;Acc:HGNC:6815]	chr1	53226900	53238518	-1	p32.3	41.43	protein_coding	1363
0.0002602	0.00122	122.67	63.5	0.517649	216103_at	ACOT11	ENSG00000162390	acyl-CoA thioesterase 11 [Source:HGNC Symbol;Acc:HGNC:18156]	chr1	54542257	54639192	1	p32.3	51.2	protein_coding	9770
2.62e-05	0.000177	24.95	65.3	2.61723	227348_at	PARS2	ENSG00000162396	prolyl-tRNA synthetase 2, mitochondrial [Source:HGNC Symbol;Acc:HGNC:30563]	chr1	54756898	54764523	-1	p32.3	49.79	protein_coding	2356
0.000494	0.00208	536.45	868.75	1.61944	218754_at	NOL9	ENSG00000162408	nucleolar protein 9 [Source:HGNC Symbol;Acc:HGNC:26265]	chr1	6521347	6554513	-1	p36.31	47.77	protein_coding	7271
0.0020668	0.00684	12.32	19.67	1.59659	1554082_a_at	NOL9	ENSG00000162408	nucleolar protein 9 [Source:HGNC Symbol;Acc:HGNC:26265]	chr1	6521347	6554513	-1	p36.31	47.77	protein_coding	7271
1.5e-06	1.63e-05	83.8	23.6	0.281623	238441_at	PRKAA2	ENSG00000162409	protein kinase AMP-activated catalytic subunit alpha 2 [Source:HGNC Symbol;Acc:HGNC:9377]	chr1	56645314	56715335	1	p32.2	36.6	protein_coding	9362
0.0002342	0.00112	65.9	29.06	0.440971	227892_at	PRKAA2	ENSG00000162409	protein kinase AMP-activated catalytic subunit alpha 2 [Source:HGNC Symbol;Acc:HGNC:9377]	chr1	56645314	56715335	1	p32.2	36.6	protein_coding	9362
0.0038372	0.0114	21.76	11.29	0.518842	240349_at	PRKAA2	ENSG00000162409	protein kinase AMP-activated catalytic subunit alpha 2 [Source:HGNC Symbol;Acc:HGNC:9377]	chr1	56645314	56715335	1	p32.2	36.6	protein_coding	9362
0.0028907	0.00903	70.68	121.18	1.71449	203068_at	KLHL21	ENSG00000162413	kelch like family member 21 [Source:HGNC Symbol;Acc:HGNC:29041]	chr1	6590724	6614607	-1	p36.31	54.46	protein_coding	6901
0.0065548	0.0179	9.16	5.3	0.578603	240613_at	JAK1	ENSG00000162434	Janus kinase 1 [Source:HGNC Symbol;Acc:HGNC:6190]	chr1	64833229	65067754	-1	p31.3	42.71	protein_coding	12620
0.000457	0.00195	52.46	25.48	0.485703	231851_at	RAVER2	ENSG00000162437	ribonucleoprotein, PTB binding 2 [Source:HGNC Symbol;Acc:HGNC:25577]	chr1	64745095	64833232	1	p31.3	37.2	protein_coding	6070
0.0011412	0.00417	33.94	63.2	1.86211	226087_at	LZIC	ENSG00000162441	leucine zipper and CTNNBIP1 domain containing [Source:HGNC Symbol;Acc:HGNC:17497]	chr1	9922113	9943407	-1	p36.22	43.89	protein_coding	5459
0.0007503	0.00295	18.81	62.91	3.3445	221898_at	PDPN	ENSG00000162493	podoplanin [Source:HGNC Symbol;Acc:HGNC:29602]	chr1	13583465	13617957	1	p36.21	45.38	protein_coding	3707
0.0004879	0.00206	66.83	198.98	2.97741	201720_s_at	LAPTM5	ENSG00000162511	lysosomal protein transmembrane 5 [Source:HGNC Symbol;Acc:HGNC:29612]	chr1	30732469	30757774	-1	p35.2	52.6	protein_coding	3228
3.11e-05	0.000204	152.68	327.07	2.14219	210371_s_at	RBBP4	ENSG00000162521	RB binding protein 4, chromatin remodeling factor [Source:HGNC Symbol;Acc:HGNC:9887]	chr1	32651142	32686211	1	p35.1	42.94	protein_coding	9470
< 1e-07	< 1e-07	55.56	12.76	0.229662	238657_at	UBXN10	ENSG00000162543	UBX domain protein 10 [Source:HGNC Symbol;Acc:HGNC:26354]	chr1	20186096	20196050	1	p36.12	47.2	protein_coding	5562
< 1e-07	< 1e-07	201.64	30.27	0.150119	232109_at	UBXN10	ENSG00000162543	UBX domain protein 10 [Source:HGNC Symbol;Acc:HGNC:26354]	chr1	20186096	20196050	1	p36.12	47.2	protein_coding	5562
< 1e-07	< 1e-07	288.42	28.14	0.097566	230092_at	UBXN10	ENSG00000162543	UBX domain protein 10 [Source:HGNC Symbol;Acc:HGNC:26354]	chr1	20186096	20196050	1	p36.12	47.2	protein_coding	5562
0.0005719	0.00235	6.4	10.06	1.57187	215783_s_at	ALPL	ENSG00000162551	alkaline phosphatase, biomineralization associated [Source:HGNC Symbol;Acc:HGNC:438]	chr1	21509397	21578410	1	p36.12	51.62	protein_coding	2980
0.0023872	0.00772	14.28	29.77	2.08473	226869_at	MEGF6	ENSG00000162591	multiple EGF like domains 6 [Source:HGNC Symbol;Acc:HGNC:3232]	chr1	3487951	3611508	-1	p36.32	62.43	protein_coding	9021
< 1e-07	< 1e-07	145.81	7.44	0.0510253	236710_at	C1orf87	ENSG00000162598	chromosome 1 open reading frame 87 [Source:HGNC Symbol;Acc:HGNC:28547]	chr1	59987269	60073770	-1	p32.1	38.38	protein_coding	4422
0.0040176	0.0119	1143.14	760.58	0.665343	226806_s_at	NFIA	ENSG00000162599	nuclear factor I A [Source:HGNC Symbol;Acc:HGNC:7784]	chr1	60865259	61462788	1	p31.3	40.05	protein_coding	55886
0.0067441	0.0183	1296.98	910.19	0.701776	224975_at	NFIA	ENSG00000162599	nuclear factor I A [Source:HGNC Symbol;Acc:HGNC:7784]	chr1	60865259	61462788	1	p31.3	40.05	protein_coding	55886
0.0071072	0.0191	161.14	98.22	0.609532	229994_at	NFIA	ENSG00000162599	nuclear factor I A [Source:HGNC Symbol;Acc:HGNC:7784]	chr1	60865259	61462788	1	p31.3	40.05	protein_coding	55886
0.0017054	0.00582	91.42	42.4	0.463793	238644_at	MYSM1	ENSG00000162601	Myb like, SWIRM and MPN domains 1 [Source:HGNC Symbol;Acc:HGNC:29401]	chr1	58643440	58700077	-1	p32.1	37.78	protein_coding	13115
7e-07	8.64e-06	250.54	689.88	2.75357	202413_s_at	USP1	ENSG00000162607	ubiquitin specific peptidase 1 [Source:HGNC Symbol;Acc:HGNC:12607]	chr1	62436297	62451804	1	p31.3	39.48	protein_coding	3869
0.0075484	0.02	28.07	78.6	2.80014	202412_s_at	USP1	ENSG00000162607	ubiquitin specific peptidase 1 [Source:HGNC Symbol;Acc:HGNC:12607]	chr1	62436297	62451804	1	p31.3	39.48	protein_coding	3869
0.0044304	0.0129	93.55	54.06	0.577873	203810_at	DNAJB4	ENSG00000162616	DnaJ heat shock protein family (Hsp40) member B4 [Source:HGNC Symbol;Acc:HGNC:14886]	chr1	77979175	78017964	1	p31.1	37.07	protein_coding	3702
0.0006495	0.00262	8.63	4.98	0.577057	1553674_at	LRRIQ3	ENSG00000162620	leucine rich repeats and IQ motif containing 3 [Source:HGNC Symbol;Acc:HGNC:28318]	chr1	74026015	74198187	-1	p31.1	34	protein_coding	8759
0.0027627	0.00871	20.8	40.46	1.94519	226568_at	FAM102B	ENSG00000162636	family with sequence similarity 102 member B [Source:HGNC Symbol;Acc:HGNC:27637]	chr1	108560089	108644900	1	p13.3	39.64	protein_coding	9350
< 1e-07	< 1e-07	11.99	64.23	5.35696	225841_at	HENMT1	ENSG00000162639	HEN methyltransferase 1 [Source:HGNC Symbol;Acc:HGNC:26400]	chr1	108648290	108661526	-1	p13.3	41.28	protein_coding	2426
< 1e-07	< 1e-07	146.32	5.78	0.0395025	243087_at	DNAI3	ENSG00000162643	dynein axonemal intermediate chain 3 [Source:HGNC Symbol;Acc:HGNC:30711]	chr1	84999147	85133138	1	p22.3	39.43	protein_coding	3923
0.0004336	0.00187	16.56	52.98	3.19928	235574_at	GBP4	ENSG00000162654	guanylate binding protein 4 [Source:HGNC Symbol;Acc:HGNC:20480]	chr1	89181144	89198942	-1	p22.2	38.84	protein_coding	6141
1.13e-05	8.79e-05	30.88	15.81	0.511982	236196_at	ZNF326	ENSG00000162664	zinc finger protein 326 [Source:HGNC Symbol;Acc:HGNC:14104]	chr1	89995110	90035533	1	p22.2	35.67	protein_coding	10988
2e-07	2.96e-06	355.12	831.07	2.34025	228785_at	ZNF281	ENSG00000162702	zinc finger protein 281 [Source:HGNC Symbol;Acc:HGNC:13075]	chr1	200404940	200410056	-1	q32.1	43.03	protein_coding	4895
1.74e-05	0.000126	71.93	154.62	2.14959	222619_at	ZNF281	ENSG00000162702	zinc finger protein 281 [Source:HGNC Symbol;Acc:HGNC:13075]	chr1	200404940	200410056	-1	q32.1	43.03	protein_coding	4895
< 1e-07	< 1e-07	45.67	113.69	2.48938	218401_s_at	ZNF281	ENSG00000162702	zinc finger protein 281 [Source:HGNC Symbol;Acc:HGNC:13075]	chr1	200404940	200410056	-1	q32.1	43.03	protein_coding	4895
< 1e-07	1.6e-06	20.9	45.6	2.18182	1555797_a_at	ARPC5	ENSG00000162704	actin related protein 2/3 complex subunit 5 [Source:HGNC Symbol;Acc:HGNC:708]	chr1	183620846	183635783	-1	q25.3	38.43	protein_coding	10650
< 1e-07	< 1e-07	330.82	1226.04	3.70606	211963_s_at	ARPC5	ENSG00000162704	actin related protein 2/3 complex subunit 5 [Source:HGNC Symbol;Acc:HGNC:708]	chr1	183620846	183635783	-1	q25.3	38.43	protein_coding	10650
8.36e-05	0.000466	339.57	691.86	2.03746	200788_s_at	PEA15	ENSG00000162734	proliferation and apoptosis adaptor protein 15 [Source:HGNC Symbol;Acc:HGNC:8822]	chr1	160205380	160215376	1	q23.2	51.75	protein_coding	2763
0.0003743	0.00165	48.62	115.09	2.36713	200787_s_at	PEA15	ENSG00000162734	proliferation and apoptosis adaptor protein 15 [Source:HGNC Symbol;Acc:HGNC:8822]	chr1	160205380	160215376	1	q23.2	51.75	protein_coding	2763
4.7e-06	4.2e-05	362.88	781.75	2.15429	226029_at	VANGL2	ENSG00000162738	VANGL planar cell polarity protein 2 [Source:HGNC Symbol;Acc:HGNC:15511]	chr1	160400564	160428670	1	q23.2	51.66	protein_coding	5354
0.0009901	0.00371	8.49	14.43	1.69965	213125_at	OLFML2B	ENSG00000162745	olfactomedin like 2B [Source:HGNC Symbol;Acc:HGNC:24558]	chr1	161983192	162023869	-1	q23.3	48.23	protein_coding	3430
2.94e-05	0.000195	7.98	4.8	0.601504	1554988_at	SLC9C2	ENSG00000162753	solute carrier family 9 member C2 (putative) [Source:HGNC Symbol;Acc:HGNC:28664]	chr1	173500460	173603072	-1	q25.1	38.59	protein_coding	5123
1.89e-05	0.000135	28.91	14.53	0.502594	227582_at	KLHDC9	ENSG00000162755	kelch domain containing 9 [Source:HGNC Symbol;Acc:HGNC:28489]	chr1	161098361	161100346	1	q23.3	56.24	protein_coding	1720
6.6e-06	5.55e-05	223.66	47	0.21014	202672_s_at	ATF3	ENSG00000162772	activating transcription factor 3 [Source:HGNC Symbol;Acc:HGNC:785]	chr1	212565334	212620777	1	q32.3	43.16	protein_coding	4040
0.0002097	0.00102	31.01	9.92	0.319897	1554980_a_at	ATF3	ENSG00000162772	activating transcription factor 3 [Source:HGNC Symbol;Acc:HGNC:785]	chr1	212565334	212620777	1	q32.3	43.16	protein_coding	4040
0.0021782	0.00715	432.77	702.51	1.62329	219286_s_at	RBM15	ENSG00000162775	RNA binding motif protein 15 [Source:HGNC Symbol;Acc:HGNC:14959]	chr1	110338506	110346681	1	p13.3	44.01	protein_coding	4670
0.0045303	0.0131	7.43	10.82	1.45626	1555761_x_at	RBM15	ENSG00000162775	RNA binding motif protein 15 [Source:HGNC Symbol;Acc:HGNC:14959]	chr1	110338506	110346681	1	p13.3	44.01	protein_coding	4670
0.0062248	0.0171	33.6	83.97	2.49911	1555760_a_at	RBM15	ENSG00000162775	RNA binding motif protein 15 [Source:HGNC Symbol;Acc:HGNC:14959]	chr1	110338506	110346681	1	p13.3	44.01	protein_coding	4670
0.0019762	0.00659	8.99	22.42	2.49388	220729_at	RBM15	ENSG00000162775	RNA binding motif protein 15 [Source:HGNC Symbol;Acc:HGNC:14959]	chr1	110338506	110346681	1	p13.3	44.01	protein_coding	4670
0.0018707	0.0063	278.01	471.73	1.69681	1555762_s_at	RBM15	ENSG00000162775	RNA binding motif protein 15 [Source:HGNC Symbol;Acc:HGNC:14959]	chr1	110338506	110346681	1	p13.3	44.01	protein_coding	4670
0.000106	0.000575	7.45	14.7	1.97315	1554575_a_at	BPNT1	ENSG00000162813	3'(2'), 5'-bisphosphate nucleotidase 1 [Source:HGNC Symbol;Acc:HGNC:1096]	chr1	220057482	220090462	-1	q41	40.42	protein_coding	3113
< 1e-07	1.6e-06	50.68	7.72	0.152328	1552269_at	SPATA17	ENSG00000162814	spermatogenesis associated 17 [Source:HGNC Symbol;Acc:HGNC:25184]	chr1	217631324	217871696	1	q41	35.7	protein_coding	6515
< 1e-07	< 1e-07	242.25	25.73	0.106213	230763_at	SPATA17	ENSG00000162814	spermatogenesis associated 17 [Source:HGNC Symbol;Acc:HGNC:25184]	chr1	217631324	217871696	1	q41	35.7	protein_coding	6515
0.0004001	0.00175	6.42	18.01	2.8053	241908_at	BROX	ENSG00000162819	BRO1 domain and CAAX motif containing [Source:HGNC Symbol;Acc:HGNC:26512]	chr1	222712553	222735196	1	q41	36.81	protein_coding	4980
0.0018878	0.00634	7.88	16.62	2.10914	238617_at	KIF26B	ENSG00000162849	kinesin family member 26B [Source:HGNC Symbol;Acc:HGNC:25484]	chr1	245154985	245709432	1	q44	44.8	protein_coding	14404
0.0002328	0.00111	90.3	241.53	2.67475	218605_at	TFB2M	ENSG00000162851	transcription factor B2, mitochondrial [Source:HGNC Symbol;Acc:HGNC:18559]	chr1	246540561	246566261	-1	q44	41.9	protein_coding	1784
0.0004801	0.00203	51.8	12.19	0.235328	222871_at	KLHDC8A	ENSG00000162873	kelch domain containing 8A [Source:HGNC Symbol;Acc:HGNC:25573]	chr1	205336061	205357090	-1	q32.1	50.87	protein_coding	3666
0.0005366	0.00222	22.96	9.24	0.402439	219331_s_at	KLHDC8A	ENSG00000162873	kelch domain containing 8A [Source:HGNC Symbol;Acc:HGNC:25573]	chr1	205336061	205357090	-1	q32.1	50.87	protein_coding	3666
0.0001216	0.000645	241.46	475.06	1.96745	226233_at	B3GALNT2	ENSG00000162885	beta-1,3-N-acetylgalactosaminyltransferase 2 [Source:HGNC Symbol;Acc:HGNC:28596]	chr1	235447190	235504452	-1	q42.3	40.22	protein_coding	10279
2e-07	2.96e-06	1380.76	529.85	0.383738	208683_at	CAPN2	ENSG00000162909	calpain 2 [Source:HGNC Symbol;Acc:HGNC:1479]	chr1	223701593	223776018	1	q41	48.73	protein_coding	8585
0.0010918	0.00402	29.98	45.14	1.50567	225719_s_at	MRPL55	ENSG00000162910	mitochondrial ribosomal protein L55 [Source:HGNC Symbol;Acc:HGNC:16686]	chr1	228106679	228109312	-1	q42.13	56.68	protein_coding	1886
0.0084102	0.0219	10.52	17.35	1.64924	206090_s_at	DISC1	ENSG00000162946	DISC1 scaffold protein [Source:HGNC Symbol;Acc:HGNC:2888]	chr1	231626790	232041272	1	q42.2	42.18	protein_coding	12931
8.64e-05	0.000479	284.06	600.31	2.11332	213826_s_at	H3-3A	ENSG00000163041	H3.3 histone A [Source:HGNC Symbol;Acc:HGNC:4764]	chr1	226061851	226072019	1	q42.12	44.55	protein_coding	3826
2.04e-05	0.000144	197.75	450.07	2.27595	211940_x_at	H3-3A	ENSG00000163041	H3.3 histone A [Source:HGNC Symbol;Acc:HGNC:4764]	chr1	226061851	226072019	1	q42.12	44.55	protein_coding	3826
3.93e-05	0.000248	519.88	1079.69	2.07681	213828_x_at	H3-3A	ENSG00000163041	H3.3 histone A [Source:HGNC Symbol;Acc:HGNC:4764]	chr1	226061851	226072019	1	q42.12	44.55	protein_coding	3826
5.46e-05	0.000326	204.42	373.46	1.82692	208755_x_at	H3-3A	ENSG00000163041	H3.3 histone A [Source:HGNC Symbol;Acc:HGNC:4764]	chr1	226061851	226072019	1	q42.12	44.55	protein_coding	3826
0.0090596	0.0233	89.86	123.31	1.37225	235415_at	RPRD2	ENSG00000163125	regulation of nuclear pre-mRNA domain containing 2 [Source:HGNC Symbol;Acc:HGNC:29039]	chr1	150363091	150476566	1	q21.2	41.76	protein_coding	9241
0.009705	0.0247	112.09	166.03	1.48122	232283_at	LYSMD1	ENSG00000163155	LysM domain containing 1 [Source:HGNC Symbol;Acc:HGNC:32070]	chr1	151159748	151165948	-1	q21.3	46.07	protein_coding	2508
3.3e-06	3.14e-05	48.67	113.23	2.32648	218672_at	SCNM1	ENSG00000163156	sodium channel modifier 1 [Source:HGNC Symbol;Acc:HGNC:23136]	chr1	151156664	151170296	1	q21.3	48.32	protein_coding	3264
6.03e-05	0.000355	58.11	99.7	1.71571	202261_at	VPS72	ENSG00000163159	vacuolar protein sorting 72 homolog [Source:HGNC Symbol;Acc:HGNC:11644]	chr1	151176304	151195321	-1	q21.3	46.35	protein_coding	1780
0.0041489	0.0122	87.84	128.83	1.46664	203515_s_at	PMVK	ENSG00000163344	phosphomevalonate kinase [Source:HGNC Symbol;Acc:HGNC:9141]	chr1	154924740	154936719	-1	q21.3	49.67	protein_coding	1002
1e-07	1.6e-06	473.03	893.01	1.88785	225370_at	PYGO2	ENSG00000163348	pygopus family PHD finger 2 [Source:HGNC Symbol;Acc:HGNC:30257]	chr1	154957026	154963853	-1	q21.3	54.77	protein_coding	3664
< 1e-07	< 1e-07	3114.55	1538.85	0.494084	212293_at	HIPK1	ENSG00000163349	homeodomain interacting protein kinase 1 [Source:HGNC Symbol;Acc:HGNC:19006]	chr1	113929324	113977869	1	p13.2	39.78	protein_coding	9148
2e-07	2.96e-06	32.82	215.52	6.56673	219010_at	INAVA	ENSG00000163362	innate immunity activator [Source:HGNC Symbol;Acc:HGNC:25599]	chr1	200891048	200915742	1	q32.1	53.23	protein_coding	5341
6.66e-05	0.000387	78.71	143.05	1.81743	225427_s_at	NAXE	ENSG00000163382	NAD(P)HX epimerase [Source:HGNC Symbol;Acc:HGNC:18453]	chr1	156591756	156609507	1	q22	48	protein_coding	10113
0.0049489	0.0141	15.05	7.59	0.504319	229275_at	IGFN1	ENSG00000163395	immunoglobulin like and fibronectin type III domain containing 1 [Source:HGNC Symbol;Acc:HGNC:24607]	chr1	201190824	201228952	1	q32.1	52.47	protein_coding	12117
< 1e-07	< 1e-07	58.7	157.25	2.67888	212165_at	TMEM183A	ENSG00000163444	transmembrane protein 183A [Source:HGNC Symbol;Acc:HGNC:20173]	chr1	203007374	203024848	1	q32.1	41.51	protein_coding	4038
0.0024247	0.00782	800.56	1154.19	1.44173	200910_at	CCT3	ENSG00000163468	chaperonin containing TCP1 subunit 3 [Source:HGNC Symbol;Acc:HGNC:1616]	chr1	156308968	156367873	-1	q22	45.93	protein_coding	3864
0.0011118	0.00408	9.14	15.33	1.67724	223544_at	TMEM79	ENSG00000163472	transmembrane protein 79 [Source:HGNC Symbol;Acc:HGNC:28196]	chr1	156282935	156293185	1	q22	50.78	protein_coding	3032
0.0004147	0.0018	394.8	649.08	1.64407	200652_at	SSR2	ENSG00000163479	signal sequence receptor subunit 2 [Source:HGNC Symbol;Acc:HGNC:11324]	chr1	156009048	156020951	-1	q22	46.99	protein_coding	6643
5e-05	0.000302	413.21	61.48	0.148786	213438_at	NFASC	ENSG00000163531	neurofascin [Source:HGNC Symbol;Acc:HGNC:29866]	chr1	204828651	205022822	1	q32.1	47.92	protein_coding	21271
0.0008072	0.00314	8.64	15.56	1.80093	204959_at	MNDA	ENSG00000163563	myeloid cell nuclear differentiation antigen [Source:HGNC Symbol;Acc:HGNC:7183]	chr1	158831351	158849506	1	q23.1	34.66	protein_coding	2025
1.3e-05	9.89e-05	5.45	25.18	4.62018	206513_at	AIM2	ENSG00000163568	absent in melanoma 2 [Source:HGNC Symbol;Acc:HGNC:357]	chr1	159062484	159147096	-1	q23.2	40.1	protein_coding	1874
0.0002727	0.00127	41.05	80.75	1.96711	225404_at	SMIM12	ENSG00000163866	small integral membrane protein 12 [Source:HGNC Symbol;Acc:HGNC:25154]	chr1	34712737	34859755	-1	p34.3	47.94	protein_coding	10337
0.0008345	0.00323	36.21	59.6	1.64595	227594_at	ZMYM6	ENSG00000163867	zinc finger MYM-type containing 6 [Source:HGNC Symbol;Acc:HGNC:13050]	chr1	34986165	35031945	-1	p34.3	38.78	protein_coding	9568
< 1e-07	< 1e-07	15.84	45.23	2.85543	219409_at	SNIP1	ENSG00000163877	Smad nuclear interacting protein 1 [Source:HGNC Symbol;Acc:HGNC:30587]	chr1	37534449	37554293	-1	p34.3	43.19	protein_coding	5718
< 1e-07	< 1e-07	206.55	38.79	0.1878	205186_at	DNALI1	ENSG00000163879	dynein axonemal light intermediate chain 1 [Source:HGNC Symbol;Acc:HGNC:14353]	chr1	37556919	37566857	1	p34.3	49.25	protein_coding	4456
< 1e-07	< 1e-07	215.89	20.84	0.0965306	227081_at	DNALI1	ENSG00000163879	dynein axonemal light intermediate chain 1 [Source:HGNC Symbol;Acc:HGNC:14353]	chr1	37556919	37566857	1	p34.3	49.25	protein_coding	4456
0.002539	0.00812	43.96	84.17	1.9147	222902_s_at	EXO5	ENSG00000164002	exonuclease 5 [Source:HGNC Symbol;Acc:HGNC:26115]	chr1	40508741	40516038	1	p34.2	43.75	protein_coding	2574
0.0097682	0.0248	18.83	26.09	1.38555	232780_s_at	ZNF691	ENSG00000164011	zinc finger protein 691 [Source:HGNC Symbol;Acc:HGNC:28028]	chr1	42846573	42852477	1	p34.2	47.25	protein_coding	2036
3.5e-06	3.3e-05	166.72	310.09	1.85994	212155_at	RNF187	ENSG00000168159	ring finger protein 187 [Source:HGNC Symbol;Acc:HGNC:27146]	chr1	228487382	228496188	1	q42.13	55.49	protein_coding	3386
0.0010441	0.00388	740.22	1237.2	1.67139	224570_s_at	IRF2BP2	ENSG00000168264	interferon regulatory factor 2 binding protein 2 [Source:HGNC Symbol;Acc:HGNC:21729]	chr1	234604269	234610178	-1	q42.3	52.08	protein_coding	5377
0.0064597	0.0177	27.47	43.07	1.56789	224572_s_at	IRF2BP2	ENSG00000168264	interferon regulatory factor 2 binding protein 2 [Source:HGNC Symbol;Acc:HGNC:21729]	chr1	234604269	234610178	-1	q42.3	52.08	protein_coding	5377
3.22e-05	0.000211	161.63	337.07	2.08544	225638_at	COA6	ENSG00000168275	cytochrome c oxidase assembly factor 6 [Source:HGNC Symbol;Acc:HGNC:18025]	chr1	234373456	234385080	1	q42.2	43.85	protein_coding	2288
4.2e-06	3.82e-05	1130.3	2013.45	1.78134	201757_at	NDUFS5	ENSG00000168653	NADH:ubiquinone oxidoreductase subunit S5 [Source:HGNC Symbol;Acc:HGNC:7712]	chr1	39026318	39034636	1	p34.3	46.54	protein_coding	548
8e-06	6.54e-05	1048.87	520.27	0.496029	200849_s_at	AHCYL1	ENSG00000168710	adenosylhomocysteinase like 1 [Source:HGNC Symbol;Acc:HGNC:344]	chr1	109984765	110023742	1	p13.3	40.92	protein_coding	5035
5e-05	0.000302	14.33	24.04	1.6776	227184_at	PTAFR	ENSG00000169403	platelet activating factor receptor [Source:HGNC Symbol;Acc:HGNC:9582]	chr1	28147166	28193936	-1	p35.3	48	protein_coding	4208
1.33e-05	0.000101	114.47	324.51	2.83489	221881_s_at	CLIC4	ENSG00000169504	chloride intracellular channel 4 [Source:HGNC Symbol;Acc:HGNC:13518]	chr1	24745382	24844321	1	p36.11	41.66	protein_coding	4467
3.52e-05	0.000227	13.88	41.62	2.99856	201559_s_at	CLIC4	ENSG00000169504	chloride intracellular channel 4 [Source:HGNC Symbol;Acc:HGNC:13518]	chr1	24745382	24844321	1	p36.11	41.66	protein_coding	4467
0.0005697	0.00234	376.43	969.44	2.57535	201560_at	CLIC4	ENSG00000169504	chloride intracellular channel 4 [Source:HGNC Symbol;Acc:HGNC:13518]	chr1	24745382	24844321	1	p36.11	41.66	protein_coding	4467
0.0002025	0.000988	83.46	168.75	2.02193	206752_s_at	DFFB	ENSG00000169598	DNA fragmentation factor subunit beta [Source:HGNC Symbol;Acc:HGNC:2773]	chr1	3857267	3885429	1	p36.32	51.66	protein_coding	3870
0.0077491	0.0205	127	214.37	1.68795	225831_at	LUZP1	ENSG00000169641	leucine zipper protein 1 [Source:HGNC Symbol;Acc:HGNC:14985]	chr1	23084023	23177808	-1	p36.12	43.28	protein_coding	9658
0.0001355	0.000705	490.75	775.77	1.58078	225880_at	TOR1AIP2	ENSG00000169905	torsin 1A interacting protein 2 [Source:HGNC Symbol;Acc:HGNC:24055]	chr1	179839967	179877803	-1	q25.2	38.85	protein_coding	18876
0.0001021	0.000556	16.27	27.9	1.71481	228733_at	PUSL1	ENSG00000169972	pseudouridine synthase like 1 [Source:HGNC Symbol;Acc:HGNC:26914]	chr1	1308597	1311677	1	p36.33	66.6	protein_coding	2459
0.0091485	0.0235	21.01	13.3	0.633032	225615_at	IFFO2	ENSG00000169991	intermediate filament family orphan 2 [Source:HGNC Symbol;Acc:HGNC:27006]	chr1	18904280	18956676	-1	p36.13	54.33	protein_coding	6179
0.0024807	0.00797	10.91	18.88	1.73052	205154_at	LRRN2	ENSG00000170382	leucine rich repeat neuronal 2 [Source:HGNC Symbol;Acc:HGNC:16914]	chr1	204617170	204685738	-1	q32.1	50.12	protein_coding	5686
2.5e-06	2.5e-05	140.69	19.81	0.140806	213832_at	KCND3	ENSG00000171385	potassium voltage-gated channel subfamily D member 3 [Source:HGNC Symbol;Acc:HGNC:6239]	chr1	111770662	111989668	-1	p13.2	47.34	protein_coding	8027
4e-07	5.38e-06	106.05	260.16	2.45318	218684_at	LRRC8D	ENSG00000171492	leucine rich repeat containing 8 VRAC subunit D [Source:HGNC Symbol;Acc:HGNC:16992]	chr1	89821014	89936611	1	p22.2	40.31	protein_coding	4852
1.05e-05	8.27e-05	841.05	167.25	0.198859	231192_at	LPAR3	ENSG00000171517	lysophosphatidic acid receptor 3 [Source:HGNC Symbol;Acc:HGNC:14298]	chr1	84811602	84893206	-1	p22.3	41.6	protein_coding	3536
0.0021207	0.00699	113.43	273.9	2.41471	223296_at	SLC25A33	ENSG00000171612	solute carrier family 25 member 33 [Source:HGNC Symbol;Acc:HGNC:29681]	chr1	9539465	9585173	1	p36.22	45.52	protein_coding	3865
0.0086971	0.0225	145.67	231.57	1.58969	225693_s_at	CAMTA1	ENSG00000171735	calmodulin binding transcription activator 1 [Source:HGNC Symbol;Acc:HGNC:18806]	chr1	6785454	7769706	1	p36.31	48	protein_coding	9903
0.0003363	0.00151	64.41	200.12	3.10697	202613_at	CTPS1	ENSG00000171793	CTP synthase 1 [Source:HGNC Symbol;Acc:HGNC:2519]	chr1	40979688	41012565	1	p34.2	45.01	protein_coding	11164
0.0009489	0.00359	9.12	20.98	2.30044	221900_at	COL8A2	ENSG00000171812	collagen type VIII alpha 2 chain [Source:HGNC Symbol;Acc:HGNC:2216]	chr1	36095239	36125222	-1	p34.3	55.63	protein_coding	4669
< 1e-07	< 1e-07	53.78	176.91	3.28951	204228_at	PPIH	ENSG00000171960	peptidylprolyl isomerase H [Source:HGNC Symbol;Acc:HGNC:14651]	chr1	42658335	42676758	1	p34.2	43.92	protein_coding	5095
< 1e-07	< 1e-07	4.82	14.42	2.9917	239579_at	EPHX4	ENSG00000172031	epoxide hydrolase 4 [Source:HGNC Symbol;Acc:HGNC:23758]	chr1	92029985	92063538	1	p22.1	38.34	protein_coding	2250
0.0090471	0.0232	11.65	7.46	0.640343	221091_at	INSL5	ENSG00000172410	insulin like 5 [Source:HGNC Symbol;Acc:HGNC:6088]	chr1	66797740	66801276	-1	p31.3	37.23	protein_coding	736
< 1e-07	< 1e-07	107.52	456.18	4.24275	201897_s_at	CKS1B	ENSG00000173207	CDC28 protein kinase regulatory subunit 1B [Source:HGNC Symbol;Acc:HGNC:19083]	chr1	154974653	154979251	1	q21.3	44.4	protein_coding	2340
0.0069882	0.0188	22.74	44.32	1.94899	219330_at	VANGL1	ENSG00000173218	VANGL planar cell polarity protein 1 [Source:HGNC Symbol;Acc:HGNC:15512]	chr1	115641970	115698224	1	p13.1	45.32	protein_coding	9045
5.18e-05	0.000312	143.18	266.45	1.86094	214214_s_at	C1QB	ENSG00000173369	complement C1q B chain [Source:HGNC Symbol;Acc:HGNC:1242]	chr1	22652762	22661637	1	p36.12	51.05	protein_coding	1492
1.87e-05	0.000134	10.67	32.22	3.01968	218232_at	C1QA	ENSG00000173372	complement C1q A chain [Source:HGNC Symbol;Acc:HGNC:1241]	chr1	22636628	22639678	1	p36.12	56.54	protein_coding	1220
0.0027856	0.00877	886.27	1329.71	1.50034	224867_at	MICOS10	ENSG00000173436	mitochondrial contact site and cristae organizing system subunit 10 [Source:HGNC Symbol;Acc:HGNC:32068]	chr1	19484403	19629821	1	p36.13	45	protein_coding	5480
0.0058523	0.0163	20.49	33.03	1.61201	1569631_at	NMNAT1	ENSG00000173614	nicotinamide nucleotide adenylyltransferase 1 [Source:HGNC Symbol;Acc:HGNC:17877]	chr1	9943428	9985501	1	p36.22	46.13	protein_coding	4610
< 1e-07	< 1e-07	68.36	6.45	0.0943534	1554545_at	APOBEC4	ENSG00000173627	apolipoprotein B mRNA editing enzyme catalytic polypeptide like 4 [Source:HGNC Symbol;Acc:HGNC:32152]	chr1	183646275	183653316	-1	q25.3	38.51	protein_coding	2782
0.0068852	0.0186	716.37	1243.34	1.73561	202233_s_at	UQCRH	ENSG00000173660	ubiquinol-cytochrome c reductase hinge protein [Source:HGNC Symbol;Acc:HGNC:12590]	chr1	46303698	46316776	1	p33	46.23	protein_coding	1341
5.1e-06	4.49e-05	345.77	667.06	1.9292	212773_s_at	TOMM20	ENSG00000173726	translocase of outer mitochondrial membrane 20 [Source:HGNC Symbol;Acc:HGNC:20947]	chr1	235109341	235128837	-1	q42.3	41.52	protein_coding	3438
< 1e-07	< 1e-07	962.49	18.05	0.0187534	228100_at	PIFO	ENSG00000173947	primary cilia formation [Source:HGNC Symbol;Acc:HGNC:27009]	chr1	111346600	111353013	1	p13.2	41.27	protein_coding	3949
0.0018658	0.00629	40.24	74.05	1.84021	227981_at	CYB561D1	ENSG00000174151	cytochrome b561 family member D1 [Source:HGNC Symbol;Acc:HGNC:26804]	chr1	109494052	109502932	1	p13.3	52.44	protein_coding	5690
< 1e-07	< 1e-07	5.01	35.46	7.07784	204603_at	EXO1	ENSG00000174371	exonuclease 1 [Source:HGNC Symbol;Acc:HGNC:3511]	chr1	241847967	241895148	1	q43	39.58	protein_coding	4137
1.33e-05	0.000101	43.17	75.97	1.75979	222459_at	AKIRIN1	ENSG00000174574	akirin 1 [Source:HGNC Symbol;Acc:HGNC:25744]	chr1	38991276	39006059	1	p34.3	43.8	protein_coding	2688
0.0072647	0.0194	174.63	326.82	1.8715	217893_s_at	AKIRIN1	ENSG00000174574	akirin 1 [Source:HGNC Symbol;Acc:HGNC:25744]	chr1	38991276	39006059	1	p34.3	43.8	protein_coding	2688
< 1e-07	< 1e-07	163.97	505.46	3.08264	200644_at	MARCKSL1	ENSG00000175130	MARCKS like 1 [Source:HGNC Symbol;Acc:HGNC:7142]	chr1	32333839	32336233	-1	p35.1	63.72	protein_coding	1546
0.0027596	0.0087	86.95	146.72	1.68741	223265_at	SH3BP5L	ENSG00000175137	SH3 binding domain protein 5 like [Source:HGNC Symbol;Acc:HGNC:29360]	chr1	248810446	248825915	-1	q44	52.13	protein_coding	5724
0.0069285	0.0187	182.78	291.08	1.59252	218580_x_at	AURKAIP1	ENSG00000175756	aurora kinase A interacting protein 1 [Source:HGNC Symbol;Acc:HGNC:24114]	chr1	1373730	1375495	-1	p36.33	66.87	protein_coding	1669
0.0075352	0.02	78.22	124.84	1.59601	225555_x_at	AURKAIP1	ENSG00000175756	aurora kinase A interacting protein 1 [Source:HGNC Symbol;Acc:HGNC:24114]	chr1	1373730	1375495	-1	p36.33	66.87	protein_coding	1669
0.0093248	0.0238	196.05	301.79	1.53935	225552_x_at	AURKAIP1	ENSG00000175756	aurora kinase A interacting protein 1 [Source:HGNC Symbol;Acc:HGNC:24114]	chr1	1373730	1375495	-1	p36.33	66.87	protein_coding	1669
1.1e-06	1.27e-05	5.63	12.93	2.29663	209260_at	SFN	ENSG00000175793	stratifin [Source:HGNC Symbol;Acc:HGNC:10773]	chr1	26863149	26864456	1	p36.11	62.77	protein_coding	1308
< 1e-07	< 1e-07	10.11	65.35	6.4639	33323_r_at	SFN	ENSG00000175793	stratifin [Source:HGNC Symbol;Acc:HGNC:10773]	chr1	26863149	26864456	1	p36.11	62.77	protein_coding	1308
< 1e-07	< 1e-07	45.15	187.06	4.14308	33322_i_at	SFN	ENSG00000175793	stratifin [Source:HGNC Symbol;Acc:HGNC:10773]	chr1	26863149	26864456	1	p36.11	62.77	protein_coding	1308
2.5e-06	2.5e-05	134.47	52.5	0.390422	230769_at	DENND2C	ENSG00000175984	DENN domain containing 2C [Source:HGNC Symbol;Acc:HGNC:24748]	chr1	114582848	114670422	-1	p13.2	39.41	protein_coding	7413
5.68e-05	0.000337	7.33	15.49	2.11323	1553959_a_at	B3GALT6	ENSG00000176022	beta-1,3-galactosyltransferase 6 [Source:HGNC Symbol;Acc:HGNC:17978]	chr1	1232237	1235041	1	p36.33	64.21	protein_coding	2805
0.0009293	0.00353	45.45	79.89	1.75776	225733_at	B3GALT6	ENSG00000176022	beta-1,3-galactosyltransferase 6 [Source:HGNC Symbol;Acc:HGNC:17978]	chr1	1232237	1235041	1	p36.33	64.21	protein_coding	2805
0.0034437	0.0104	71.02	109.12	1.53647	228970_at	ZBTB8OS	ENSG00000176261	zinc finger and BTB domain containing 8 opposite strand [Source:HGNC Symbol;Acc:HGNC:24094]	chr1	32600172	32650903	-1	p35.1	44.37	protein_coding	3531
0.0051214	0.0145	10.42	6.74	0.646833	231275_at	PRDM16-DT	ENSG00000177133	PRDM16 divergent transcript [Source:HGNC Symbol;Acc:HGNC:48664]	chr1	3059615	3068437	-1	p36.32	61.79	lncRNA	5600
0.0068057	0.0184	33.46	17.68	0.528392	219225_at	PGBD5	ENSG00000177614	piggyBac transposable element derived 5 [Source:HGNC Symbol;Acc:HGNC:19405]	chr1	230314490	230426332	-1	q42.13	48.33	protein_coding	11257
0.0006544	0.00263	64.04	163.2	2.54841	226723_at	SVBP	ENSG00000177868	small vasohibin binding protein [Source:HGNC Symbol;Acc:HGNC:29204]	chr1	42807052	42817397	-1	p34.2	41.93	protein_coding	1353
0.0010132	0.00378	18.57	7.9	0.425417	236621_at	RPS27	ENSG00000177954	ribosomal protein S27 [Source:HGNC Symbol;Acc:HGNC:10416]	chr1	153990762	153992155	1	q21.3	45.91	protein_coding	1028
0.0039876	0.0118	2238.94	3229.21	1.44229	200741_s_at	RPS27	ENSG00000177954	ribosomal protein S27 [Source:HGNC Symbol;Acc:HGNC:10416]	chr1	153990762	153992155	1	q21.3	45.91	protein_coding	1028
1.9e-06	1.99e-05	11.78	21.95	1.86333	219345_at	BOLA1	ENSG00000178096	bolA family member 1 [Source:HGNC Symbol;Acc:HGNC:24263]	chr1	149887890	149900798	1	q21.2	45.46	protein_coding	1461
0.002704	0.00856	154.77	81.04	0.523616	205872_x_at	PDE4DIP	ENSG00000178104	phosphodiesterase 4D interacting protein [Source:HGNC Symbol;Acc:HGNC:15580]	chr1	148808181	149048286	1	q21.2	41	protein_coding	27623
0.001173	0.00426	11.51	23.11	2.00782	214130_s_at	PDE4DIP	ENSG00000178104	phosphodiesterase 4D interacting protein [Source:HGNC Symbol;Acc:HGNC:15580]	chr1	148808181	149048286	1	q21.2	41	protein_coding	27623
0.0019803	0.0066	21.58	10.02	0.464319	212390_at	PDE4DIP	ENSG00000178104	phosphodiesterase 4D interacting protein [Source:HGNC Symbol;Acc:HGNC:15580]	chr1	148808181	149048286	1	q21.2	41	protein_coding	27623
0.0094487	0.0241	115.46	59.23	0.512992	213388_at	PDE4DIP	ENSG00000178104	phosphodiesterase 4D interacting protein [Source:HGNC Symbol;Acc:HGNC:15580]	chr1	148808181	149048286	1	q21.2	41	protein_coding	27623
< 1e-07	< 1e-07	257.14	9.14	0.0355448	237131_at	RIIAD1	ENSG00000178796	regulatory subunit of type II PKA R-subunit domain containing 1 [Source:HGNC Symbol;Acc:HGNC:26686]	chr1	151710433	151729805	1	q21.3	51.01	protein_coding	2276
0.0002686	0.00125	9.42	4.14	0.43949	243753_at	ERICH3	ENSG00000178965	glutamate rich 3 [Source:HGNC Symbol;Acc:HGNC:25346]	chr1	74568117	74673792	-1	p31.1	36.47	protein_coding	8827
< 1e-07	< 1e-07	529.65	5.52	0.010422	229973_at	ERICH3	ENSG00000178965	glutamate rich 3 [Source:HGNC Symbol;Acc:HGNC:25346]	chr1	74568117	74673792	-1	p31.1	36.47	protein_coding	8827
< 1e-07	< 1e-07	807.72	2370.72	2.93508	224578_at	RCC2	ENSG00000179051	regulator of chromosome condensation 2 [Source:HGNC Symbol;Acc:HGNC:30297]	chr1	17406760	17439677	-1	p36.13	51.69	protein_coding	4079
1.8e-06	1.9e-05	392.84	185.22	0.47149	202838_at	FUCA1	ENSG00000179163	alpha-L-fucosidase 1 [Source:HGNC Symbol;Acc:HGNC:4006]	chr1	23845077	23868290	-1	p36.11	45.7	protein_coding	2043
2.91e-05	0.000193	42.65	17.94	0.420633	240771_at	CATSPERE	ENSG00000179397	catsper channel auxiliary subunit epsilon [Source:HGNC Symbol;Acc:HGNC:28491]	chr1	244454377	244641177	1	q44	39.42	protein_coding	4431
< 1e-07	< 1e-07	859.98	8.7	0.0101165	231044_at	C1orf194	ENSG00000179902	chromosome 1 open reading frame 194 [Source:HGNC Symbol;Acc:HGNC:32331]	chr1	109105951	109113857	-1	p13.3	47.38	protein_coding	1227
8.4e-06	6.82e-05	16.04	39.84	2.48379	206499_s_at	RCC1	ENSG00000180198	regulator of chromosome condensation 1 [Source:HGNC Symbol;Acc:HGNC:1913]	chr1	28505943	28539300	1	p35.3	50	protein_coding	3888
6e-07	7.62e-06	28.6	123.71	4.32552	227970_at	GPR157	ENSG00000180758	G protein-coupled receptor 157 [Source:HGNC Symbol;Acc:HGNC:23687]	chr1	9100305	9129102	-1	p36.22	49.97	protein_coding	5304
1e-07	1.6e-06	9.38	54.07	5.76439	221582_at	H2AW	ENSG00000181218	H2A.W histone [Source:HGNC Symbol;Acc:HGNC:20507]	chr1	228456979	228457873	-1	q42.13	57.65	protein_coding	895
1.1e-05	8.6e-05	11.38	28.59	2.5123	231681_x_at	H2AW	ENSG00000181218	H2A.W histone [Source:HGNC Symbol;Acc:HGNC:20507]	chr1	228456979	228457873	-1	q42.13	57.65	protein_coding	895
1e-07	1.6e-06	11.94	29.92	2.50586	225593_at	LSM10	ENSG00000181817	LSM10, U7 small nuclear RNA associated [Source:HGNC Symbol;Acc:HGNC:17562]	chr1	36391238	36397908	-1	p34.3	50.71	protein_coding	1506
0.0072708	0.0194	15.56	27.24	1.75064	215490_at	IBA57	ENSG00000181873	iron-sulfur cluster assembly factor IBA57 [Source:HGNC Symbol;Acc:HGNC:27302]	chr1	228165804	228182257	1	q42.13	54.58	protein_coding	10230
3.4e-06	3.22e-05	858.15	1526.85	1.77923	203316_s_at	SNRPE	ENSG00000182004	small nuclear ribonucleoprotein polypeptide E [Source:HGNC Symbol;Acc:HGNC:11161]	chr1	203861599	203871152	1	q32.1	42.4	protein_coding	2080
3.8e-06	3.53e-05	575.48	1013.41	1.76098	215450_at	SNRPE	ENSG00000182004	small nuclear ribonucleoprotein polypeptide E [Source:HGNC Symbol;Acc:HGNC:11161]	chr1	203861599	203871152	1	q32.1	42.4	protein_coding	2080
1.58e-05	0.000117	5.52	9.13	1.65399	221052_at	TDRKH	ENSG00000182134	tudor and KH domain containing [Source:HGNC Symbol;Acc:HGNC:11713]	chr1	151770107	151791416	-1	q21.3	43.72	protein_coding	5092
0.0001377	0.000714	5.16	8.96	1.73643	221053_s_at	TDRKH	ENSG00000182134	tudor and KH domain containing [Source:HGNC Symbol;Acc:HGNC:11713]	chr1	151770107	151791416	-1	q21.3	43.72	protein_coding	5092
< 1e-07	< 1e-07	8.18	46.19	5.6467	223530_at	TDRKH	ENSG00000182134	tudor and KH domain containing [Source:HGNC Symbol;Acc:HGNC:11713]	chr1	151770107	151791416	-1	q21.3	43.72	protein_coding	5092
0.0001336	0.000696	1923.06	1027.83	0.534476	242123_at	PAQR7	ENSG00000182749	progestin and adipoQ receptor family member 7 [Source:HGNC Symbol;Acc:HGNC:23146]	chr1	25861484	25875708	-1	p36.11	52.5	protein_coding	3244
0.0005052	0.00212	34.77	70.04	2.01438	225480_at	C1orf116	ENSG00000182795	chromosome 1 open reading frame 116 [Source:HGNC Symbol;Acc:HGNC:28667]	chr1	207018522	207032756	-1	q32.1	47.45	protein_coding	5501
4.2e-06	3.82e-05	11.66	31.08	2.66552	204478_s_at	RABIF	ENSG00000183155	RAB interacting factor [Source:HGNC Symbol;Acc:HGNC:9797]	chr1	202878282	202889149	-1	q32.1	45.5	protein_coding	3119
0.0002966	0.00136	56.53	141.88	2.50982	218235_s_at	UTP11	ENSG00000183520	UTP11 small subunit processome component [Source:HGNC Symbol;Acc:HGNC:24329]	chr1	38009258	38024820	1	p34.3	44.57	protein_coding	3381
< 1e-07	< 1e-07	8.63	37.24	4.31518	235039_x_at	LIN9	ENSG00000183814	lin-9 DREAM MuvB core complex component [Source:HGNC Symbol;Acc:HGNC:30830]	chr1	226231149	226309869	-1	q42.12	39.7	protein_coding	4442
< 1e-07	< 1e-07	110.31	16.73	0.151663	236421_at	ANKRD45	ENSG00000183831	ankyrin repeat domain 45 [Source:HGNC Symbol;Acc:HGNC:24786]	chr1	173608336	173669851	-1	q25.1	39.61	protein_coding	4125
< 1e-07	< 1e-07	34.32	680.23	19.8202	229538_s_at	IQGAP3	ENSG00000183856	IQ motif containing GTPase activating protein 3 [Source:HGNC Symbol;Acc:HGNC:20669]	chr1	156525405	156572604	-1	q22	50.86	protein_coding	6742
< 1e-07	< 1e-07	36.09	9.87	0.273483	1553299_at	DUSP5P1	ENSG00000183929	dual specificity phosphatase 5 pseudogene 1 [Source:HGNC Symbol;Acc:HGNC:32020]	chr1	228650241	228651379	1	q42.13	56.28	processed_pseudogene	1139
2.6e-06	2.58e-05	1658.56	2818.82	1.69956	208616_s_at	PTP4A2	ENSG00000184007	protein tyrosine phosphatase 4A2 [Source:HGNC Symbol;Acc:HGNC:9635]	chr1	31906421	31944856	-1	p35.2	41.84	protein_coding	6708
4.87e-05	0.000296	1725.21	2811.81	1.62984	216988_s_at	PTP4A2	ENSG00000184007	protein tyrosine phosphatase 4A2 [Source:HGNC Symbol;Acc:HGNC:9635]	chr1	31906421	31944856	-1	p35.2	41.84	protein_coding	6708
0.0094151	0.024	8.99	5.97	0.664071	214147_at	MROH7	ENSG00000184313	maestro heat like repeat family member 7 [Source:HGNC Symbol;Acc:HGNC:24802]	chr1	54641754	54710266	1	p32.3	48.55	protein_coding	9088
0.0045049	0.0131	9.17	17.74	1.93457	1554748_at	CLCNKB	ENSG00000184908	chloride voltage-gated channel Kb [Source:HGNC Symbol;Acc:HGNC:2027]	chr1	16040252	16057311	1	p36.13	59.04	protein_coding	5933
0.0001773	0.000883	24.36	78.43	3.21962	231564_at	MANEAL	ENSG00000185090	mannosidase endo-alpha like [Source:HGNC Symbol;Acc:HGNC:26452]	chr1	37793847	37801137	1	p34.3	54.59	protein_coding	2973
0.0002771	0.00128	12.62	32.24	2.55468	226132_s_at	MANEAL	ENSG00000185090	mannosidase endo-alpha like [Source:HGNC Symbol;Acc:HGNC:26452]	chr1	37793847	37801137	1	p34.3	54.59	protein_coding	2973
0.0001193	0.000635	87.07	165.15	1.89675	218080_x_at	FAF1	ENSG00000185104	Fas associated factor 1 [Source:HGNC Symbol;Acc:HGNC:3578]	chr1	50437028	50960267	-1	p32.3	38.27	protein_coding	7549
0.0014358	0.00505	184.69	333.28	1.80454	224217_s_at	FAF1	ENSG00000185104	Fas associated factor 1 [Source:HGNC Symbol;Acc:HGNC:3578]	chr1	50437028	50960267	-1	p32.3	38.27	protein_coding	7549
0.0059288	0.0164	13.98	24.08	1.72246	238004_at	PGBD2	ENSG00000185220	piggyBac transposable element derived 2 [Source:HGNC Symbol;Acc:HGNC:19399]	chr1	248906196	248919946	1	q44	46.25	protein_coding	3651
0.0062952	0.0173	8.72	18.36	2.1055	232060_at	ROR1	ENSG00000185483	receptor tyrosine kinase like orphan receptor 1 [Source:HGNC Symbol;Acc:HGNC:10256]	chr1	63774017	64181498	1	p31.3	40.97	protein_coding	6720
0.0050444	0.0143	39.35	64.49	1.63888	205253_at	PBX1	ENSG00000185630	PBX homeobox 1 [Source:HGNC Symbol;Acc:HGNC:8632]	chr1	164555584	164899296	1	q23.3	41.67	protein_coding	21370
7.46e-05	0.000425	5.33	10.52	1.97373	242283_at	DNAH14	ENSG00000185842	dynein axonemal heavy chain 14 [Source:HGNC Symbol;Acc:HGNC:2945]	chr1	224896262	225399292	1	q42.12	37.4	protein_coding	19693
0.0014043	0.00495	225.61	143.13	0.634413	229903_x_at	RNPC3	ENSG00000185946	RNA binding region (RNP1, RRM) containing 3 [Source:HGNC Symbol;Acc:HGNC:18666]	chr1	103525691	103555239	1	p21.1	35.03	protein_coding	6867
0.0001076	0.000582	9.2	39.54	4.29783	229927_at	LEMD1	ENSG00000186007	LEM domain containing 1 [Source:HGNC Symbol;Acc:HGNC:18725]	chr1	205381378	205455954	-1	q32.1	46.82	protein_coding	1041
0.0001914	0.000941	822.95	1221.15	1.48387	226801_s_at	AIDA	ENSG00000186063	axin interactor, dorsalization associated [Source:HGNC Symbol;Acc:HGNC:25761]	chr1	222668013	222713210	-1	q41	38.46	protein_coding	4232
0.0010179	0.0038	14.09	29	2.0582	220199_s_at	AIDA	ENSG00000186063	axin interactor, dorsalization associated [Source:HGNC Symbol;Acc:HGNC:25761]	chr1	222668013	222713210	-1	q41	38.46	protein_coding	4232
0.0019096	0.0064	13.15	7.14	0.542966	1553412_at	AGBL4	ENSG00000186094	ATP/GTP binding protein like 4 [Source:HGNC Symbol;Acc:HGNC:25892]	chr1	48532854	50023954	-1	p33	39.05	protein_coding	7504
2.4e-06	2.41e-05	15.51	30.83	1.98775	210573_s_at	POLR3C	ENSG00000186141	RNA polymerase III subunit C [Source:HGNC Symbol;Acc:HGNC:30076]	chr1	145824088	145844402	1	q21.1	42.76	protein_coding	4690
5.81e-05	0.000344	38.37	73.43	1.91373	209382_at	POLR3C	ENSG00000186141	RNA polymerase III subunit C [Source:HGNC Symbol;Acc:HGNC:30076]	chr1	145824088	145844402	1	q21.1	42.76	protein_coding	4690
0.0004287	0.00185	19.43	42.64	2.19454	218865_at	MTARC1	ENSG00000186205	mitochondrial amidoxime reducing component 1 [Source:HGNC Symbol;Acc:HGNC:26189]	chr1	220786913	220819659	1	q41	45.14	protein_coding	9106
7e-07	8.64e-06	11.61	20.09	1.7304	233851_s_at	TOR3A	ENSG00000186283	torsin family 3 member A [Source:HGNC Symbol;Acc:HGNC:11997]	chr1	179082070	179098023	1	q25.2	52.39	protein_coding	3224
0.0013223	0.00471	599.22	1023.73	1.70844	218459_at	TOR3A	ENSG00000186283	torsin family 3 member A [Source:HGNC Symbol;Acc:HGNC:11997]	chr1	179082070	179098023	1	q25.2	52.39	protein_coding	3224
< 1e-07	< 1e-07	66.03	16.32	0.24716	243036_at	CCDC30	ENSG00000186409	coiled-coil domain containing 30 [Source:HGNC Symbol;Acc:HGNC:26103]	chr1	42463221	42657190	1	p34.2	39.35	protein_coding	25206
0.0023488	0.00762	7.1	11.97	1.68592	226219_at	ARHGAP30	ENSG00000186517	Rho GTPase activating protein 30 [Source:HGNC Symbol;Acc:HGNC:27414]	chr1	161046946	161069970	-1	q23.3	49.52	protein_coding	5064
0.0006622	0.00266	363.08	527.44	1.45268	219988_s_at	RNF220	ENSG00000187147	ring finger protein 220 [Source:HGNC Symbol;Acc:HGNC:25552]	chr1	44405194	44651724	1	p34.1	47.21	protein_coding	9687
0.0012104	0.00437	19.87	8.66	0.435833	40687_at	GJA4	ENSG00000187513	gap junction protein alpha 4 [Source:HGNC Symbol;Acc:HGNC:4278]	chr1	34792999	34795747	1	p34.3	59.33	protein_coding	1716
0.0020019	0.00665	19.72	9.5	0.481744	204904_at	GJA4	ENSG00000187513	gap junction protein alpha 4 [Source:HGNC Symbol;Acc:HGNC:4278]	chr1	34792999	34795747	1	p34.3	59.33	protein_coding	1716
< 1e-07	< 1e-07	33.26	232.18	6.98076	205483_s_at	ISG15	ENSG00000187608	ISG15 ubiquitin like modifier [Source:HGNC Symbol;Acc:HGNC:4053]	chr1	1001138	1014540	1	p36.33	56.44	protein_coding	867
< 1e-07	< 1e-07	80.8	12.48	0.154455	231073_at	FYB2	ENSG00000187889	FYN binding protein 2 [Source:HGNC Symbol;Acc:HGNC:27295]	chr1	56718789	56819696	-1	p32.2	38.48	protein_coding	4648
< 1e-07	< 1e-07	324.88	10.24	0.0315193	238625_at	FYB2	ENSG00000187889	FYN binding protein 2 [Source:HGNC Symbol;Acc:HGNC:27295]	chr1	56718789	56819696	-1	p32.2	38.48	protein_coding	4648
1.79e-05	0.000129	48.47	15.25	0.314628	1556633_at	SNHG28	ENSG00000188004	small nucleolar RNA host gene 28 [Source:HGNC Symbol;Acc:HGNC:27647]	chr1	159834480	159855071	-1	q23.2	47.94	lncRNA	5656
0.0036091	0.0109	257.44	432.49	1.67996	220642_x_at	GPR89B	ENSG00000188092	G protein-coupled receptor 89B [Source:HGNC Symbol;Acc:HGNC:13840]	chr1	147928393	147993592	1	q21.2	39.85	protein_coding	5214
0.0011565	0.00421	7.78	16.5	2.12082	204563_at	SELL	ENSG00000188404	selectin L [Source:HGNC Symbol;Acc:HGNC:10720]	chr1	169690665	169711702	-1	q24.2	38.85	protein_coding	2731
0.001378	0.00487	133.02	61.52	0.462487	204646_at	DPYD	ENSG00000188641	dihydropyrimidine dehydrogenase [Source:HGNC Symbol;Acc:HGNC:3012]	chr1	97077743	97995000	-1	p21.3	35.1	protein_coding	7131
0.0025153	0.00806	199.77	397.69	1.99074	227998_at	S100A16	ENSG00000188643	S100 calcium binding protein A16 [Source:HGNC Symbol;Acc:HGNC:20441]	chr1	153606886	153613145	-1	q21.3	57.24	protein_coding	1701
0.0006267	0.00254	7.48	11.1	1.48396	227617_at	TMEM201	ENSG00000188807	transmembrane protein 201 [Source:HGNC Symbol;Acc:HGNC:33719]	chr1	9588911	9614877	1	p36.22	59.34	protein_coding	6981
< 1e-07	< 1e-07	184.71	425.04	2.30112	228671_at	TMEM201	ENSG00000188807	transmembrane protein 201 [Source:HGNC Symbol;Acc:HGNC:33719]	chr1	9588911	9614877	1	p36.22	59.34	protein_coding	6981
0.001347	0.00478	8.65	16.39	1.8948	205490_x_at	GJB3	ENSG00000188910	gap junction protein beta 3 [Source:HGNC Symbol;Acc:HGNC:4285]	chr1	34781214	34786369	1	p34.3	56.94	protein_coding	2362
0.0063931	0.0175	9.27	13.4	1.44552	215243_s_at	GJB3	ENSG00000188910	gap junction protein beta 3 [Source:HGNC Symbol;Acc:HGNC:4285]	chr1	34781214	34786369	1	p34.3	56.94	protein_coding	2362
< 1e-07	< 1e-07	511.88	12.58	0.0245761	231077_at	CFAP126	ENSG00000188931	cilia and flagella associated protein 126 [Source:HGNC Symbol;Acc:HGNC:32325]	chr1	161364733	161367876	-1	q23.3	42.3	protein_coding	774
0.0019654	0.00656	27.39	41.22	1.50493	202115_s_at	NOC2L	ENSG00000188976	NOC2 like nucleolar associated transcriptional repressor [Source:HGNC Symbol;Acc:HGNC:24517]	chr1	944203	959309	-1	p36.33	59.54	protein_coding	5540
1.2e-05	9.23e-05	12.12	21.52	1.77558	213481_at	S100A13	ENSG00000189171	S100 calcium binding protein A13 [Source:HGNC Symbol;Acc:HGNC:10490]	chr1	153618787	153631360	-1	q21.3	50.76	protein_coding	2216
0.0034976	0.0106	76.64	45.16	0.589248	214098_at	BTBD8	ENSG00000189195	BTB domain containing 8 [Source:HGNC Symbol;Acc:HGNC:21019]	chr1	92080305	92184725	1	p22.1	38.18	protein_coding	8342
1.81e-05	0.00013	8.84	20.16	2.28054	218677_at	S100A14	ENSG00000189334	S100 calcium binding protein A14 [Source:HGNC Symbol;Acc:HGNC:18901]	chr1	153614255	153616986	-1	q21.3	57.25	protein_coding	1277
4e-07	5.38e-06	196.67	756.54	3.84675	203186_s_at	S100A4	ENSG00000196154	S100 calcium binding protein A4 [Source:HGNC Symbol;Acc:HGNC:10494]	chr1	153543613	153550136	-1	q21.3	56.3	protein_coding	946
1.4e-06	1.54e-05	131.38	49.52	0.376922	228549_at	TMEM63A	ENSG00000196187	transmembrane protein 63A [Source:HGNC Symbol;Acc:HGNC:29118]	chr1	225845536	225882380	-1	q42.12	51.62	protein_coding	10350
0.0024854	0.00798	28.8	49.06	1.70347	218647_s_at	YRDC	ENSG00000196449	yrdC N6-threonylcarbamoyltransferase domain containing [Source:HGNC Symbol;Acc:HGNC:28905]	chr1	37802945	37808208	-1	p34.3	49.58	protein_coding	1848
2e-07	2.96e-06	219.39	46.99	0.214185	207981_s_at	ESRRG	ENSG00000196482	estrogen related receptor gamma [Source:HGNC Symbol;Acc:HGNC:3474]	chr1	216503246	217137755	-1	q41	38.06	protein_coding	10932
0.000746	0.00294	126.54	40.42	0.319425	209966_x_at	ESRRG	ENSG00000196482	estrogen related receptor gamma [Source:HGNC Symbol;Acc:HGNC:3474]	chr1	216503246	217137755	-1	q41	38.06	protein_coding	10932
< 1e-07	< 1e-07	14.57	153.87	10.5607	204268_at	S100A2	ENSG00000196754	S100 calcium binding protein A2 [Source:HGNC Symbol;Acc:HGNC:10492]	chr1	153561108	153567890	-1	q21.3	53.99	protein_coding	1546
0.0018558	0.00626	35.97	71.15	1.97804	212436_at	TRIM33	ENSG00000197323	tripartite motif containing 33 [Source:HGNC Symbol;Acc:HGNC:16290]	chr1	114392790	114511203	-1	p13.2	38.21	protein_coding	9604
0.0031607	0.00973	31.43	23.98	0.762965	234665_x_at	HHLA3	ENSG00000197568	HERV-H LTR-associating 3 [Source:HGNC Symbol;Acc:HGNC:4906]	chr1	70354805	70385339	1	p31.1	42.14	lncRNA	1222
0.0018686	0.00629	132.3	233.95	1.76833	227278_at	TAF13	ENSG00000197780	TATA-box binding protein associated factor 13 [Source:HGNC Symbol;Acc:HGNC:11546]	chr1	109062486	109076003	-1	p13.3	43.53	protein_coding	1401
0.0032558	0.00998	43.31	59.09	1.36435	227700_x_at	ATAD3A	ENSG00000197785	ATPase family AAA domain containing 3A [Source:HGNC Symbol;Acc:HGNC:25567]	chr1	1512162	1534685	1	p36.33	59.87	protein_coding	3344
6.5e-06	5.48e-05	1004.48	2293.98	2.28375	217728_at	S100A6	ENSG00000197956	S100 calcium binding protein A6 [Source:HGNC Symbol;Acc:HGNC:10496]	chr1	153534599	153536244	-1	q21.3	58.51	protein_coding	971
0.0010449	0.00388	7.8	19.66	2.52051	228923_at	S100A6	ENSG00000197956	S100 calcium binding protein A6 [Source:HGNC Symbol;Acc:HGNC:10496]	chr1	153534599	153536244	-1	q21.3	58.51	protein_coding	971
0.0025186	0.00807	160.51	285.84	1.78082	201874_at	MPZL1	ENSG00000197965	myelin protein zero like 1 [Source:HGNC Symbol;Acc:HGNC:7226]	chr1	167721192	167791919	1	q24.2	41.24	protein_coding	7069
0.0034736	0.0105	66.13	108.44	1.6398	201875_s_at	MPZL1	ENSG00000197965	myelin protein zero like 1 [Source:HGNC Symbol;Acc:HGNC:7226]	chr1	167721192	167791919	1	q24.2	41.24	protein_coding	7069
0.0060332	0.0167	17.28	32.5	1.88079	210087_s_at	MPZL1	ENSG00000197965	myelin protein zero like 1 [Source:HGNC Symbol;Acc:HGNC:7226]	chr1	167721192	167791919	1	q24.2	41.24	protein_coding	7069
0.0017119	0.00584	13.41	38.39	2.86279	228865_at	C1orf122	ENSG00000197982	chromosome 1 open reading frame 122 [Source:HGNC Symbol;Acc:HGNC:24789]	chr1	37806979	37809454	1	p34.3	63.25	protein_coding	2231
0.0016433	0.00564	50.76	93.84	1.8487	223774_at	SNHG12	ENSG00000197989	small nucleolar RNA host gene 12 [Source:HGNC Symbol;Acc:HGNC:30062]	chr1	28578538	28583132	-1	p35.3	50.99	lncRNA	4266
7.91e-05	0.000446	6.3	12.66	2.00952	214511_x_at	FCGR1B	ENSG00000198019	Fc fragment of IgG receptor Ib [Source:HGNC Symbol;Acc:HGNC:3614]	chr1	121087345	121097161	1	p11.2	41.95	protein_coding	4234
8e-07	9.64e-06	30.69	13.21	0.430433	238367_s_at	ARMH1	ENSG00000198520	armadillo like helical domain containing 1 [Source:HGNC Symbol;Acc:HGNC:34345]	chr1	44674692	44725591	1	p34.1	47.54	protein_coding	3290
1e-06	1.17e-05	34.69	12.23	0.352551	238366_at	ARMH1	ENSG00000198520	armadillo like helical domain containing 1 [Source:HGNC Symbol;Acc:HGNC:34345]	chr1	44674692	44725591	1	p34.1	47.54	protein_coding	3290
6.42e-05	0.000375	8.79	5.15	0.585893	238365_s_at	ARMH1	ENSG00000198520	armadillo like helical domain containing 1 [Source:HGNC Symbol;Acc:HGNC:34345]	chr1	44674692	44725591	1	p34.1	47.54	protein_coding	3290
3.76e-05	0.000239	654.57	375.64	0.573873	225740_x_at	MDM4	ENSG00000198625	MDM4 regulator of p53 [Source:HGNC Symbol;Acc:HGNC:6974]	chr1	204516379	204558120	1	q32.1	42.52	protein_coding	11008
8.3e-06	6.76e-05	39.62	78.71	1.98662	217885_at	IPO9	ENSG00000198700	importin 9 [Source:HGNC Symbol;Acc:HGNC:19425]	chr1	201829149	201884291	1	q32.1	41.9	protein_coding	11904
1.7e-06	1.81e-05	109.85	296.8	2.70187	1558692_at	GLMP	ENSG00000198715	glycosylated lysosomal membrane protein [Source:HGNC Symbol;Acc:HGNC:29436]	chr1	156290089	156295689	-1	q22	53.92	protein_coding	3471
< 1e-07	< 1e-07	6.64	17.1	2.5753	1558693_s_at	GLMP	ENSG00000198715	glycosylated lysosomal membrane protein [Source:HGNC Symbol;Acc:HGNC:29436]	chr1	156290089	156295689	-1	q22	53.92	protein_coding	3471
< 1e-07	< 1e-07	6.73	14	2.08024	225401_at	GLMP	ENSG00000198715	glycosylated lysosomal membrane protein [Source:HGNC Symbol;Acc:HGNC:29436]	chr1	156290089	156295689	-1	q22	53.92	protein_coding	3471
7.82e-05	0.000442	323.16	474.1	1.46708	206015_s_at	FOXJ3	ENSG00000198815	forkhead box J3 [Source:HGNC Symbol;Acc:HGNC:29178]	chr1	42176539	42335877	-1	p34.2	38.57	protein_coding	6896
0.0004077	0.00178	11.43	23.64	2.06824	225642_at	KTI12	ENSG00000198841	KTI12 chromatin associated homolog [Source:HGNC Symbol;Acc:HGNC:25160]	chr1	52032103	52033810	-1	p32.3	55.33	protein_coding	1708
6e-07	7.62e-06	231.75	618.87	2.67042	225399_at	TSEN15	ENSG00000198860	tRNA splicing endonuclease subunit 15 [Source:HGNC Symbol;Acc:HGNC:16791]	chr1	184051651	184123978	1	q25.3	38.96	protein_coding	10197
0.0001997	0.000977	11.94	19.37	1.62228	230257_s_at	TSEN15	ENSG00000198860	tRNA splicing endonuclease subunit 15 [Source:HGNC Symbol;Acc:HGNC:16791]	chr1	184051651	184123978	1	q25.3	38.96	protein_coding	10197
3.18e-05	0.000208	334.57	539.64	1.61294	222000_at	C1orf174	ENSG00000198912	chromosome 1 open reading frame 174 [Source:HGNC Symbol;Acc:HGNC:27915]	chr1	3889125	3900293	-1	p36.32	49.32	protein_coding	4883
1.1e-06	1.27e-05	34.99	68.76	1.96513	34868_at	SMG5	ENSG00000198952	SMG5 nonsense mediated mRNA decay factor [Source:HGNC Symbol;Acc:HGNC:24644]	chr1	156249224	156282825	-1	q22	49.82	protein_coding	5304
4.5e-06	4.05e-05	23.72	37.83	1.59486	212147_at	SMG5	ENSG00000198952	SMG5 nonsense mediated mRNA decay factor [Source:HGNC Symbol;Acc:HGNC:24644]	chr1	156249224	156282825	-1	q22	49.82	protein_coding	5304
4.7e-06	4.2e-05	15.24	6.16	0.404199	223608_at	EFCAB2	ENSG00000203666	EF-hand calcium binding domain 2 [Source:HGNC Symbol;Acc:HGNC:28166]	chr1	244969705	245127164	1	q44	42.37	protein_coding	8607
0.0006426	0.00259	17.45	7.18	0.411461	207572_at	EFCAB2	ENSG00000203666	EF-hand calcium binding domain 2 [Source:HGNC Symbol;Acc:HGNC:28166]	chr1	244969705	245127164	1	q44	42.37	protein_coding	8607
< 1e-07	< 1e-07	1102.54	287.27	0.260553	233375_at	EFCAB2	ENSG00000203666	EF-hand calcium binding domain 2 [Source:HGNC Symbol;Acc:HGNC:28166]	chr1	244969705	245127164	1	q44	42.37	protein_coding	8607
< 1e-07	< 1e-07	131.15	21.68	0.165307	211200_s_at	EFCAB2	ENSG00000203666	EF-hand calcium binding domain 2 [Source:HGNC Symbol;Acc:HGNC:28166]	chr1	244969705	245127164	1	q44	42.37	protein_coding	8607
0.0020529	0.0068	14.46	28.71	1.98548	1565951_s_at	CHML	ENSG00000203668	CHM like Rab escort protein [Source:HGNC Symbol;Acc:HGNC:1941]	chr1	241628851	241640369	-1	q43	38.23	protein_coding	7778
1.2e-06	1.36e-05	120.57	38.15	0.316414	230121_at	SERTAD4-AS1	ENSG00000203706	SERTAD4 antisense RNA 1 [Source:HGNC Symbol;Acc:HGNC:32019]	chr1	210231456	210234047	-1	q32.2	58.06	lncRNA	1004
0.006195	0.017	5.03	9.9	1.96819	217552_x_at	CR1	ENSG00000203710	complement C3b/C4b receptor 1 (Knops blood group) [Source:HGNC Symbol;Acc:HGNC:2334]	chr1	207496147	207641765	1	q32.2	39.16	protein_coding	12583
0.001872	0.0063	9.21	5.58	0.605863	229402_at	SAMD13	ENSG00000203943	sterile alpha motif domain containing 13 [Source:HGNC Symbol;Acc:HGNC:24582]	chr1	84298366	84389957	1	p31.1	39.5	protein_coding	3405
8.21e-05	0.000459	8.02	36.81	4.58978	231517_at	ZYG11A	ENSG00000203995	zyg-11 family member A, cell cycle regulator [Source:HGNC Symbol;Acc:HGNC:32058]	chr1	52842511	52894998	1	p32.3	43.56	protein_coding	4694
6.97e-05	0.000402	21.64	36.71	1.6964	218562_s_at	MACO1	ENSG00000204178	macoilin 1 [Source:HGNC Symbol;Acc:HGNC:25572]	chr1	25430858	25500209	1	p36.11	40.69	protein_coding	3979
2.55e-05	0.000173	13.29	29.14	2.19263	1553067_a_at	GNRHR2	ENSG00000211451	gonadotropin releasing hormone receptor 2 (pseudogene) [Source:HGNC Symbol;Acc:HGNC:16341]	chr1	145919013	145925341	1	q21.1	44.54	transcribed_unitary_pseudogene	2511
1.29e-05	9.83e-05	414.54	741.73	1.78928	225356_at	SFT2D2	ENSG00000213064	SFT2 domain containing 2 [Source:HGNC Symbol;Acc:HGNC:25140]	chr1	168225938	168253021	1	q24.2	43.38	protein_coding	11217
0.0004632	0.00197	12.45	28.16	2.26185	214838_at	SFT2D2	ENSG00000213064	SFT2 domain containing 2 [Source:HGNC Symbol;Acc:HGNC:25140]	chr1	168225938	168253021	1	q24.2	43.38	protein_coding	11217
< 1e-07	< 1e-07	145.38	18.63	0.128147	220308_at	CFAP45	ENSG00000213085	cilia and flagella associated protein 45 [Source:HGNC Symbol;Acc:HGNC:17229]	chr1	159872364	159900165	-1	q23.2	46.23	protein_coding	2627
< 1e-07	1.6e-06	24.07	115.55	4.80058	202647_s_at	NRAS	ENSG00000213281	NRAS proto-oncogene, GTPase [Source:HGNC Symbol;Acc:HGNC:7989]	chr1	114704469	114716771	-1	p13.2	38.66	protein_coding	4326
< 1e-07	< 1e-07	417.05	1021.27	2.4488	224985_at	NRAS	ENSG00000213281	NRAS proto-oncogene, GTPase [Source:HGNC Symbol;Acc:HGNC:7989]	chr1	114704469	114716771	-1	p13.2	38.66	protein_coding	4326
2e-06	2.07e-05	139.57	42.11	0.301712	204418_x_at	GSTM2	ENSG00000213366	glutathione S-transferase mu 2 [Source:HGNC Symbol;Acc:HGNC:4634]	chr1	109668022	109709551	1	p13.3	46.7	protein_coding	9116
2.42e-05	0.000166	2899.28	1815.36	0.626142	227095_at	LEPROT	ENSG00000213625	leptin receptor overlapping transcript [Source:HGNC Symbol;Acc:HGNC:29477]	chr1	65420587	65436007	1	p31.3	40.78	protein_coding	5237
0.0019094	0.0064	14.3	20.55	1.43706	211282_x_at	TNFRSF25	ENSG00000215788	TNF receptor superfamily member 25 [Source:HGNC Symbol;Acc:HGNC:11910]	chr1	6460786	6466175	-1	p36.31	59.74	protein_coding	4263
0.0040175	0.0119	145.78	75.82	0.520099	211038_s_at	CROCCP2	ENSG00000215908	CROCC pseudogene 2 [Source:HGNC Symbol;Acc:HGNC:28170]	chr1	16618253	16657232	-1	p36.13	52.04	transcribed_unprocessed_pseudogene	5606
0.0065832	0.0179	41.61	20.77	0.499159	1557049_at	BTBD19	ENSG00000222009	BTB domain containing 19 [Source:HGNC Symbol;Acc:HGNC:27145]	chr1	44808482	44815585	1	p34.1	56.17	protein_coding	3520
< 1e-07	< 1e-07	48.74	13.67	0.280468	233918_at	DCDC2B	ENSG00000222046	doublecortin domain containing 2B [Source:HGNC Symbol;Acc:HGNC:32576]	chr1	32209089	32216192	1	p35.2	53.11	protein_coding	1870
3.5e-06	3.3e-05	972.99	507.27	0.521352	227074_at	CCDC18-AS1	ENSG00000223745	CCDC18 antisense RNA 1 [Source:HGNC Symbol;Acc:HGNC:52262]	chr1	93262186	93346025	-1	p22.1	39.07	lncRNA	6284
0.0031381	0.00968	22.92	37.98	1.65707	220734_s_at	CPTP	ENSG00000224051	ceramide-1-phosphate transfer protein [Source:HGNC Symbol;Acc:HGNC:28116]	chr1	1324756	1328896	1	p36.33	65.25	protein_coding	2555
0.0069524	0.0188	7.46	16.79	2.25067	1561281_a_at	LEMD1-AS1	ENSG00000226235	LEMD1 antisense RNA 1 [Source:HGNC Symbol;Acc:HGNC:44132]	chr1	205373252	205387440	1	q32.1	44.6	lncRNA	2781
0.0078676	0.0207	25.91	43.54	1.68043	1557055_s_at	LINC01128	ENSG00000228794	long intergenic non-protein coding RNA 1128 [Source:HGNC Symbol;Acc:HGNC:49377]	chr1	825138	859446	1	p36.33	46.54	lncRNA	15682
0.0003761	0.00166	35.23	64.84	1.84048	225317_at	ACBD6	ENSG00000230124	acyl-CoA binding domain containing 6 [Source:HGNC Symbol;Acc:HGNC:23339]	chr1	180269653	180502954	-1	q25.3	37.67	protein_coding	7512
0.0004616	0.00197	6.76	17.48	2.5858	230423_at	FOXD3-AS1	ENSG00000230798	FOXD3 antisense RNA 1 [Source:HGNC Symbol;Acc:HGNC:40241]	chr1	63320884	63324441	-1	p31.3	64.95	lncRNA	1208
< 1e-07	< 1e-07	513.76	155.28	0.302242	234341_x_at		ENSG00000231057	novel transcript	chr1	211675749	211690103	1	q32.3	45.91	lncRNA	2465
0.0007107	0.00282	899.93	278.76	0.309757	218353_at	RGS5	ENSG00000232995	regulator of G protein signaling 5 [Source:NCBI gene (formerly Entrezgene);Acc:8490]	chr1	163244505	163321894	-1	q23.3	37.85	lncRNA	3626
0.0012898	0.00461	16.39	8.63	0.526541	240075_at	FHAD1-AS1	ENSG00000233485	FHAD1 antisense RNA 1 [Source:HGNC Symbol;Acc:HGNC:41241]	chr1	15326680	15343876	-1	p36.21	48.02	lncRNA	3105
2.7e-06	2.66e-05	24.29	6.94	0.285714	231687_at	ERICH3-AS1	ENSG00000234497	ERICH3 antisense RNA 1 [Source:HGNC Symbol;Acc:HGNC:41093]	chr1	74577430	74626098	1	p31.1	35.82	protein_coding	5371
0.0008614	0.00331	46.21	79.53	1.72106	1560402_at	GAS5	ENSG00000234741	growth arrest specific 5 [Source:HGNC Symbol;Acc:HGNC:16355]	chr1	173858559	173868882	-1	q25.1	44.51	protein_coding	4842
0.002058	0.00681	304.15	508.02	1.67029	228238_at	GAS5	ENSG00000234741	growth arrest specific 5 [Source:HGNC Symbol;Acc:HGNC:16355]	chr1	173858559	173868882	-1	q25.1	44.51	lncRNA	4842
0.0002423	0.00115	24.74	9.03	0.364996	1561045_a_at	LINC01732	ENSG00000237292	long intergenic non-protein coding RNA 1732 [Source:HGNC Symbol;Acc:HGNC:52520]	chr1	181174484	181182208	1	q25.3	49.4	lncRNA	667
< 1e-07	1.6e-06	950.13	188.58	0.198478	208498_s_at	AMY1A	ENSG00000237763	amylase alpha 1A [Source:HGNC Symbol;Acc:HGNC:474]	chr1	103655760	103664554	1	p21.1	34.13	protein_coding	2035
0.0004885	0.00206	18.3	8.57	0.468306	210905_x_at	POU5F1P4	ENSG00000237872	POU class 5 homeobox 1 pseudogene 4 [Source:HGNC Symbol;Acc:HGNC:33310]	chr1	155433178	155434262	1	q22	58.89	processed_pseudogene	1085
0.001217	0.00439	7.92	5.47	0.690657	236399_at		ENSG00000238005	novel transcript	chr1	234957342	234970062	-1	q42.3	46.96	lncRNA	3681
0.0053074	0.015	22.9	9.29	0.405677	236398_s_at		ENSG00000238005	novel transcript	chr1	234957342	234970062	-1	q42.3	46.96	lncRNA	3681
0.0089054	0.0229	11.08	6.1	0.550542	1568892_at	LRIG2-DT	ENSG00000238198	LRIG2 divergent transcript [Source:HGNC Symbol;Acc:HGNC:54312]	chr1	113011687	113073113	-1	p13.2	45.14	lncRNA	2467
7.9e-06	6.47e-05	6.62	14.61	2.20695	227019_at	C1orf226	ENSG00000239887	chromosome 1 open reading frame 226 [Source:HGNC Symbol;Acc:HGNC:34351]	chr1	162378841	162386812	1	q23.3	51.47	protein_coding	4313
0.0004637	0.00197	585.27	832.53	1.42247	220526_s_at	MRPL20	ENSG00000242485	mitochondrial ribosomal protein L20 [Source:HGNC Symbol;Acc:HGNC:14478]	chr1	1401909	1407293	-1	p36.33	53.02	protein_coding	2767
5.6e-06	4.83e-05	10.35	22.74	2.1971	205107_s_at	EFNA4	ENSG00000243364	ephrin A4 [Source:HGNC Symbol;Acc:HGNC:3224]	chr1	155063737	155069553	1	q21.3	54.13	protein_coding	1257
1.5e-06	1.63e-05	12.23	5.06	0.413737	1553425_at	CFAP57	ENSG00000243710	cilia and flagella associated protein 57 [Source:HGNC Symbol;Acc:HGNC:26485]	chr1	43172330	43254358	1	p34.2	43.99	protein_coding	5583
0.0003358	0.00151	55.5	26.98	0.486126	222054_at	PPIEL	ENSG00000243970	peptidylprolyl isomerase E like pseudogene [Source:HGNC Symbol;Acc:HGNC:33195]	chr1	39522280	39559671	-1	p34.3	47.67	transcribed_unprocessed_pseudogene	5416
1e-07	1.6e-06	114.35	513.15	4.48754	211456_x_at	MT1HL1	ENSG00000244020	metallothionein 1H like 1 [Source:HGNC Symbol;Acc:HGNC:31864]	chr1	237004103	237004441	-1	q43	59	protein_coding	339
0.00087	0.00334	10.37	15.79	1.52266	211395_x_at	FCGR2C	ENSG00000244682	Fc fragment of IgG receptor IIc (gene/pseudogene) [Source:HGNC Symbol;Acc:HGNC:15626]	chr1	161581339	161605662	1	q23.3	44.62	polymorphic_pseudogene	3580
0.0026533	0.00842	168.98	274.97	1.62723	227386_s_at	TMEM200B	ENSG00000253304	transmembrane protein 200B [Source:HGNC Symbol;Acc:HGNC:33785]	chr1	29119429	29123903	-1	p35.3	64.51	protein_coding	2606
< 1e-07	< 1e-07	22.54	82.79	3.67303	1554246_at	C1orf210	ENSG00000253313	chromosome 1 open reading frame 210 [Source:HGNC Symbol;Acc:HGNC:28755]	chr1	43281877	43285617	-1	p34.2	53.81	protein_coding	1522
4e-07	5.38e-06	6.8	19.06	2.80294	227512_at	MEX3A	ENSG00000254726	mex-3 RNA binding family member A [Source:HGNC Symbol;Acc:HGNC:33482]	chr1	156072013	156082465	-1	q22	53.97	protein_coding	6591
8e-07	9.64e-06	5.84	14.19	2.42979	226346_at	MEX3A	ENSG00000254726	mex-3 RNA binding family member A [Source:HGNC Symbol;Acc:HGNC:33482]	chr1	156072013	156082465	-1	q22	53.97	protein_coding	6591
< 1e-07	< 1e-07	11.66	58.77	5.04031	236885_at	MEX3A	ENSG00000254726	mex-3 RNA binding family member A [Source:HGNC Symbol;Acc:HGNC:33482]	chr1	156072013	156082465	-1	q22	53.97	protein_coding	6591
0.0043123	0.0126	20.58	42.15	2.0481	1558404_at	LINC00622	ENSG00000260941	long intergenic non-protein coding RNA 622 [Source:HGNC Symbol;Acc:HGNC:44251]	chr1	119597702	119599271	-1	p12	37.71	lncRNA	1570
0.0056163	0.0157	10.9	18.97	1.74037	222334_at	RHEX	ENSG00000263961	regulator of hemoglobinization and erythroid cell expansion [Source:HGNC Symbol;Acc:HGNC:25341]	chr1	206053173	206102449	1	q32.1	44.16	protein_coding	1721
2.58e-05	0.000175	2495.92	1622.26	0.649965	214722_at	NOTCH2NLA	ENSG00000264343	notch 2 N-terminal like A	chr1	146146203	146229041	-1	q21.1		protein_coding
0.0052284	0.0148	59.43	41.58	0.699647	238994_at	OTUD7B	ENSG00000264522	OTU deubiquitinase 7B [Source:HGNC Symbol;Acc:HGNC:16683]	chr1	149937812	150010726	-1	q21.2	42.48	protein_coding	12227
0.0059271	0.0164	8.7	19.83	2.27931	226701_at	GJA5	ENSG00000265107	gap junction protein alpha 5 [Source:HGNC Symbol;Acc:HGNC:4279]	chr1	147756199	147773362	-1	q21.2	46.17	protein_coding	3288
2.34e-05	0.000161	57.92	131.55	2.27124	214113_s_at	RBM8A	ENSG00000265241	RNA binding motif protein 8A [Source:HGNC Symbol;Acc:HGNC:9905]	chr1	145917714	145927678	-1	q21.1	46.78	protein_coding	5544
2.38e-05	0.000164	22.04	57.25	2.59755	217857_s_at	RBM8A	ENSG00000265241	RNA binding motif protein 8A [Source:HGNC Symbol;Acc:HGNC:9905]	chr1	145917714	145927678	-1	q21.1	46.78	protein_coding	5544
< 1e-07	< 1e-07	71.92	199.35	2.77183	222443_s_at	RBM8A	ENSG00000265241	RNA binding motif protein 8A [Source:HGNC Symbol;Acc:HGNC:9905]	chr1	145917714	145927678	-1	q21.1	46.78	protein_coding	5544
0.0019112	0.00641	240.45	387.02	1.60957	226468_at	RNF115	ENSG00000265491	ring finger protein 115 [Source:HGNC Symbol;Acc:HGNC:18154]	chr1	145738868	145824095	-1	q21.1	41.92	protein_coding	11059
2.44e-05	0.000167	874.31	1363.77	1.55982	214257_s_at	SEC22B	ENSG00000265808	SEC22 homolog B, vesicle trafficking protein [Source:HGNC Symbol;Acc:HGNC:10700]	chr1	120150898	120176520	-1	p12	36.14	protein_coding	9039
< 1e-07	< 1e-07	442.64	773.55	1.74758	209207_s_at	SEC22B	ENSG00000265808	SEC22 homolog B, vesicle trafficking protein [Source:HGNC Symbol;Acc:HGNC:10700]	chr1	120150898	120176520	-1	p12	36.14	protein_coding	9039
1.43e-05	0.000107	1214.77	464.34	0.382245	201009_s_at	TXNIP	ENSG00000265972	thioredoxin interacting protein [Source:HGNC Symbol;Acc:HGNC:16952]	chr1	145992435	145996579	-1	q21.1	42.39	protein_coding	3604
0.0004114	0.00179	1155.94	530.05	0.458545	201010_s_at	TXNIP	ENSG00000265972	thioredoxin interacting protein [Source:HGNC Symbol;Acc:HGNC:16952]	chr1	145992435	145996579	-1	q21.1	42.39	protein_coding	3604
0.0025839	0.00824	860.76	376.51	0.437416	201008_s_at	TXNIP	ENSG00000265972	thioredoxin interacting protein [Source:HGNC Symbol;Acc:HGNC:16952]	chr1	145992435	145996579	-1	q21.1	42.39	protein_coding	3604
0.0095953	0.0244	250.87	337.93	1.34703	222997_s_at	MRPS21	ENSG00000266472	mitochondrial ribosomal protein S21 [Source:HGNC Symbol;Acc:HGNC:14046]	chr1	150293861	150308979	1	q21.2	46.47	protein_coding	1500
0.0051553	0.0146	7.03	16.06	2.2845	215039_at	LINC01140	ENSG00000267272	long intergenic non-protein coding RNA 1140 [Source:HGNC Symbol;Acc:HGNC:27922]	chr1	87129765	87169198	1	p22.3	45.03	lncRNA	6717
0.0005965	0.00243	13.55	5.51	0.406642	240810_at	MKNK1-AS1	ENSG00000269956	MKNK1 antisense RNA 1 [Source:HGNC Symbol;Acc:HGNC:44129]	chr1	46538611	46570255	1	p33	52.46	lncRNA	2530
2e-07	2.96e-06	6.09	15.91	2.61248	223898_at	ZNF670	ENSG00000277462	zinc finger protein 670 [Source:HGNC Symbol;Acc:HGNC:28167]	chr1	247034637	247078811	-1	q44	41.13	protein_coding	4197
0.0043116	0.0126	5.27	7.64	1.44972	223660_at	ADORA3	ENSG00000282608	adenosine A3 receptor [Source:HGNC Symbol;Acc:HGNC:268]	chr1	111499429	111503633	-1	p13.2	39.38	protein_coding	2560
1.3e-06	1.45e-05	21.39	58.96	2.75643	203715_at	TBCE	ENSG00000284770	tubulin folding cofactor E [Source:HGNC Symbol;Acc:HGNC:11582]	chr1	235367360	235452443	1	q42.3	44.21	protein_coding	12444
3.91e-05	0.000247	99.4	206.9	2.08149	203714_s_at	TBCE	ENSG00000285053	tubulin folding cofactor E [Source:HGNC Symbol;Acc:HGNC:11582]	chr1	235328570	235448952	1	q42.3	44.34	protein_coding	5184
9.16e-05	0.000505	50.44	101.36	2.00952	225131_at	ZRANB1	ENSG00000019995	zinc finger RANBP2-type containing 1 [Source:HGNC Symbol;Acc:HGNC:18224]	chr10	124942123	124988189	1	q26.13	39.68	protein_coding	5993
3.23e-05	0.000211	748.48	299.39	0.399997	201426_s_at	VIM	ENSG00000026025	vimentin [Source:HGNC Symbol;Acc:HGNC:12692]	chr10	17228241	17237593	1	p13	46.3	protein_coding	5176
0.0063782	0.0175	47.93	26.84	0.559983	204781_s_at	FAS	ENSG00000026103	Fas cell surface death receptor [Source:HGNC Symbol;Acc:HGNC:11920]	chr10	88990531	89017059	1	q23.31	37.94	protein_coding	5578
0.0002959	0.00136	6.99	10.6	1.51645	224461_s_at	AIFM2	ENSG00000042286	apoptosis inducing factor mitochondria associated 2 [Source:HGNC Symbol;Acc:HGNC:21411]	chr10	70098223	70132934	-1	q22.1	50.25	protein_coding	5135
2.51e-05	0.000171	69.94	25.58	0.365742	202156_s_at	CELF2	ENSG00000048740	CUGBP Elav-like family member 2 [Source:HGNC Symbol;Acc:HGNC:2550]	chr10	10798397	11336675	1	p14	41.91	protein_coding	10978
0.0001946	0.000954	240.49	109.99	0.457358	202158_s_at	CELF2	ENSG00000048740	CUGBP Elav-like family member 2 [Source:HGNC Symbol;Acc:HGNC:2550]	chr10	10798397	11336675	1	p14	41.91	protein_coding	10978
0.000875	0.00336	1161.71	558.42	0.480688	202157_s_at	CELF2	ENSG00000048740	CUGBP Elav-like family member 2 [Source:HGNC Symbol;Acc:HGNC:2550]	chr10	10798397	11336675	1	p14	41.91	protein_coding	10978
0.0089939	0.0231	31.88	17.81	0.558657	1556323_at	CELF2	ENSG00000048740	CUGBP Elav-like family member 2 [Source:HGNC Symbol;Acc:HGNC:2550]	chr10	10798397	11336675	1	p14	41.91	protein_coding	10978
2.7e-06	2.66e-05	58.39	128.52	2.20106	200008_s_at	GDI2	ENSG00000057608	GDP dissociation inhibitor 2 [Source:HGNC Symbol;Acc:HGNC:4227]	chr10	5765223	5842132	-1	p15.1	43.74	protein_coding	3918
0.0022334	0.0073	24.94	13.44	0.538893	208102_s_at	PSD	ENSG00000059915	pleckstrin and Sec7 domain containing [Source:HGNC Symbol;Acc:HGNC:9507]	chr10	102402617	102421539	-1	q24.32	59.67	protein_coding	5979
2.03e-05	0.000144	8.35	15.56	1.86347	1554441_a_at	WAPL	ENSG00000062650	WAPL cohesin release factor [Source:HGNC Symbol;Acc:HGNC:23293]	chr10	86435256	86521792	-1	q23.2	39.86	protein_coding	7205
2e-07	2.96e-06	6.7	17.43	2.60149	220651_s_at	MCM10	ENSG00000065328	minichromosome maintenance 10 replication initiation factor [Source:HGNC Symbol;Acc:HGNC:18043]	chr10	13161558	13211110	1	p13	43.59	protein_coding	5456
< 1e-07	< 1e-07	8.54	41.76	4.88993	222962_s_at	MCM10	ENSG00000065328	minichromosome maintenance 10 replication initiation factor [Source:HGNC Symbol;Acc:HGNC:18043]	chr10	13161558	13211110	1	p13	43.59	protein_coding	5456
< 1e-07	< 1e-07	7.33	30.91	4.21692	223570_at	MCM10	ENSG00000065328	minichromosome maintenance 10 replication initiation factor [Source:HGNC Symbol;Acc:HGNC:18043]	chr10	13161558	13211110	1	p13	43.59	protein_coding	5456
0.0086896	0.0225	76.19	111.8	1.46738	206875_s_at	SLK	ENSG00000065613	STE20 like kinase [Source:HGNC Symbol;Acc:HGNC:11088]	chr10	103967140	104029233	1	q24.33	36.59	protein_coding	8107
0.0054809	0.0154	157.5	98.14	0.623111	229155_at	GSTO2	ENSG00000065621	glutathione S-transferase omega 2 [Source:HGNC Symbol;Acc:HGNC:23064]	chr10	104268873	104304950	1	q25.1	43.48	protein_coding	9926
1.5e-06	1.63e-05	100.78	284.1	2.81901	208229_at	FGFR2	ENSG00000066468	fibroblast growth factor receptor 2 [Source:HGNC Symbol;Acc:HGNC:3689]	chr10	121478332	121598458	-1	q26.13	45.41	protein_coding	18813
0.0030376	0.00942	8.69	16.17	1.86076	203639_s_at	FGFR2	ENSG00000066468	fibroblast growth factor receptor 2 [Source:HGNC Symbol;Acc:HGNC:3689]	chr10	121478332	121598458	-1	q26.13	45.41	protein_coding	18813
0.0043218	0.0126	1151.18	636.07	0.552537	224606_at	KLF6	ENSG00000067082	Kruppel like factor 6 [Source:HGNC Symbol;Acc:HGNC:2235]	chr10	3775996	3785281	-1	p15.2	48.08	protein_coding	6139
0.0064089	0.0175	95.99	51.26	0.534014	208961_s_at	KLF6	ENSG00000067082	Kruppel like factor 6 [Source:HGNC Symbol;Acc:HGNC:2235]	chr10	3775996	3785281	-1	p15.2	48.08	protein_coding	6139
2.54e-05	0.000173	279.22	619.99	2.22044	211764_s_at	UBE2D1	ENSG00000072401	ubiquitin conjugating enzyme E2 D1 [Source:HGNC Symbol;Acc:HGNC:12474]	chr10	58334979	58370751	1	q21.1	36.06	protein_coding	3480
3.89e-05	0.000246	18.63	30.97	1.66237	214590_s_at	UBE2D1	ENSG00000072401	ubiquitin conjugating enzyme E2 D1 [Source:HGNC Symbol;Acc:HGNC:12474]	chr10	58334979	58370751	1	q21.1	36.06	protein_coding	3480
2.9e-06	2.82e-05	430.04	173.79	0.404125	212651_at	RHOBTB1	ENSG00000072422	Rho related BTB domain containing 1 [Source:HGNC Symbol;Acc:HGNC:18738]	chr10	60869438	61001440	-1	q21.2	38.94	protein_coding	4779
0.002128	0.00701	51.15	25.7	0.502444	209889_at	SEC31B	ENSG00000075826	SEC31 homolog B, COPII coat complex component [Source:HGNC Symbol;Acc:HGNC:23197]	chr10	100486646	100519864	-1	q24.31	46.28	protein_coding	7934
< 1e-07	< 1e-07	78.53	15.63	0.199032	206228_at	PAX2	ENSG00000075891	paired box 2 [Source:HGNC Symbol;Acc:HGNC:8616]	chr10	100735396	100829944	1	q24.31	51.28	protein_coding	6582
4e-07	5.38e-06	175.89	318.27	1.80948	222399_s_at	TM9SF3	ENSG00000077147	transmembrane 9 superfamily member 3 [Source:HGNC Symbol;Acc:HGNC:21529]	chr10	96518110	96587452	-1	q24.1	37.03	protein_coding	7494
2.12e-05	0.000149	610.14	273.65	0.448504	224755_at	TM9SF3	ENSG00000077147	transmembrane 9 superfamily member 3 [Source:HGNC Symbol;Acc:HGNC:21529]	chr10	96518110	96587452	-1	q24.1	37.03	protein_coding	7494
< 1e-07	< 1e-07	62.18	4.94	0.0794468	210032_s_at	SPAG6	ENSG00000077327	sperm associated antigen 6 [Source:HGNC Symbol;Acc:HGNC:11215]	chr10	22345445	22454224	1	p12.2	38.39	protein_coding	3876
< 1e-07	< 1e-07	466.22	5.52	0.0118399	210033_s_at	SPAG6	ENSG00000077327	sperm associated antigen 6 [Source:HGNC Symbol;Acc:HGNC:11215]	chr10	22345445	22454224	1	p12.2	38.39	protein_coding	3876
1e-06	1.17e-05	79.85	205.58	2.57458	201543_s_at	SAR1A	ENSG00000079332	secretion associated Ras related GTPase 1A [Source:HGNC Symbol;Acc:HGNC:10534]	chr10	70147289	70170523	-1	q22.1	40.56	protein_coding	6914
4e-07	5.38e-06	33.48	67.15	2.00568	208941_s_at	SEPHS1	ENSG00000086475	selenophosphate synthetase 1 [Source:HGNC Symbol;Acc:HGNC:19685]	chr10	13317428	13348298	-1	p13	45.78	protein_coding	3884
0.0014481	0.00509	593.78	892.96	1.50386	208939_at	SEPHS1	ENSG00000086475	selenophosphate synthetase 1 [Source:HGNC Symbol;Acc:HGNC:19685]	chr10	13317428	13348298	-1	p13	45.78	protein_coding	3884
0.0086459	0.0224	9.11	14.07	1.54446	229038_at	CWF19L1	ENSG00000095485	CWF19 like cell cycle control factor 1 [Source:HGNC Symbol;Acc:HGNC:25613]	chr10	100232298	100267680	-1	q24.31	42.57	protein_coding	3985
0.0082142	0.0215	187.53	127.89	0.681971	226680_at	IKZF5	ENSG00000095574	IKAROS family zinc finger 5 [Source:HGNC Symbol;Acc:HGNC:14283]	chr10	122990807	123008812	-1	q26.13	38.31	protein_coding	4928
0.0056854	0.0159	650.54	227.47	0.349663	218087_s_at	SORBS1	ENSG00000095637	sorbin and SH3 domain containing 1 [Source:HGNC Symbol;Acc:HGNC:14565]	chr10	95311771	95561414	-1	q24.1	44.47	protein_coding	10951
1.37e-05	0.000103	52.02	15.87	0.305075	221204_s_at	CRTAC1	ENSG00000095713	cartilage acidic protein 1 [Source:HGNC Symbol;Acc:HGNC:14882]	chr10	97865000	98030828	-1	q24.2	48.15	protein_coding	3553
0.0002273	0.00109	137.31	205.48	1.49647	217742_s_at	WAC	ENSG00000095787	WW domain containing adaptor with coiled-coil [Source:HGNC Symbol;Acc:HGNC:17327]	chr10	28532493	28623112	1	p12.1	37.79	protein_coding	12780
0.0002597	0.00121	274.56	125.92	0.458625	230154_at	WAC	ENSG00000095787	WW domain containing adaptor with coiled-coil [Source:HGNC Symbol;Acc:HGNC:17327]	chr10	28532493	28623112	1	p12.1	37.79	protein_coding	12780
< 1e-07	1.6e-06	287.78	1728.07	6.00483	200832_s_at	SCD	ENSG00000099194	stearoyl-CoA desaturase [Source:HGNC Symbol;Acc:HGNC:10571]	chr10	100347233	100364826	1	q24.31	46.86	protein_coding	5245
2.39e-05	0.000164	36.74	248.36	6.75993	200831_s_at	SCD	ENSG00000099194	stearoyl-CoA desaturase [Source:HGNC Symbol;Acc:HGNC:10571]	chr10	100347233	100364826	1	q24.31	46.86	protein_coding	5245
1.59e-05	0.000117	88.16	178.98	2.03017	224377_s_at	RAB18	ENSG00000099246	RAB18, member RAS oncogene family [Source:HGNC Symbol;Acc:HGNC:14244]	chr10	27504174	27543207	1	p12.1	36.68	protein_coding	14362
9.14e-05	0.000504	67.72	160.53	2.3705	224787_s_at	RAB18	ENSG00000099246	RAB18, member RAS oncogene family [Source:HGNC Symbol;Acc:HGNC:14244]	chr10	27504174	27543207	1	p12.1	36.68	protein_coding	14362
0.0009039	0.00344	21.23	48.92	2.30429	222803_at	PRTFDC1	ENSG00000099256	phosphoribosyl transferase domain containing 1 [Source:HGNC Symbol;Acc:HGNC:23333]	chr10	24848614	24952606	-1	p12.1	41.87	protein_coding	2324
0.00396	0.0117	632.79	349.57	0.552427	208690_s_at	PDLIM1	ENSG00000107438	PDZ and LIM domain 1 [Source:HGNC Symbol;Acc:HGNC:2067]	chr10	95237572	95291012	-1	q23.33	43.73	protein_coding	2227
0.0001197	0.000636	8.69	24.84	2.85846	209603_at	GATA3	ENSG00000107485	GATA binding protein 3 [Source:HGNC Symbol;Acc:HGNC:4172]	chr10	8045378	8075198	1	p14	51.55	protein_coding	3396
2.21e-05	0.000154	40.03	84.31	2.10617	203335_at	PHYH	ENSG00000107537	phytanoyl-CoA 2-hydroxylase [Source:HGNC Symbol;Acc:HGNC:8940]	chr10	13277796	13302412	-1	p13	46.07	protein_coding	3377
7.77e-05	0.000439	14.82	5.01	0.338057	1562969_at	DNMBP	ENSG00000107554	dynamin binding protein [Source:HGNC Symbol;Acc:HGNC:30373]	chr10	99875577	100009947	-1	q24.2	43.71	protein_coding	8489
< 1e-07	< 1e-07	539.27	134.73	0.249838	212838_at	DNMBP	ENSG00000107554	dynamin binding protein [Source:HGNC Symbol;Acc:HGNC:30373]	chr10	99875577	100009947	-1	q24.2	43.71	protein_coding	8489
0.0008854	0.00339	176.34	96.33	0.546274	203884_s_at	RAB11FIP2	ENSG00000107560	RAB11 family interacting protein 2 [Source:HGNC Symbol;Acc:HGNC:29152]	chr10	118004916	118046941	-1	q26.11	35.75	protein_coding	6507
0.001005	0.00376	111.82	44.38	0.396888	203883_s_at	RAB11FIP2	ENSG00000107560	RAB11 family interacting protein 2 [Source:HGNC Symbol;Acc:HGNC:29152]	chr10	118004916	118046941	-1	q26.11	35.75	protein_coding	6507
1.8e-06	1.9e-05	14.48	5.53	0.381906	206775_at	CUBN	ENSG00000107611	cubilin [Source:HGNC Symbol;Acc:HGNC:2548]	chr10	16823966	17129811	-1	p13	39.49	protein_coding	13264
4e-07	5.38e-06	29.72	7.32	0.246299	232121_at	TRDMT1	ENSG00000107614	tRNA aspartic acid methyltransferase 1 [Source:HGNC Symbol;Acc:HGNC:2977]	chr10	17137336	17202054	-1	p13	36.91	protein_coding	15453
0.0001141	0.000612	61.86	23.67	0.382638	243504_at	TRDMT1	ENSG00000107614	tRNA aspartic acid methyltransferase 1 [Source:HGNC Symbol;Acc:HGNC:2977]	chr10	17137336	17202054	-1	p13	36.91	protein_coding	15453
0.0026405	0.00839	103.67	186.18	1.79589	209175_at	SEC23IP	ENSG00000107651	SEC23 interacting protein [Source:HGNC Symbol;Acc:HGNC:17018]	chr10	119892730	119944657	1	q26.11	40.1	protein_coding	7847
5.4e-06	4.69e-05	11.63	32.28	2.77558	211376_s_at	NSMCE4A	ENSG00000107672	NSE4 homolog A, SMC5-SMC6 complex component [Source:HGNC Symbol;Acc:HGNC:25935]	chr10	121957091	121975217	-1	q26.13	43.85	protein_coding	3543
0.0079281	0.0208	57.55	33.67	0.585056	228506_at	NSMCE4A	ENSG00000107672	NSE4 homolog A, SMC5-SMC6 complex component [Source:HGNC Symbol;Acc:HGNC:25935]	chr10	121957091	121975217	-1	q26.13	43.85	protein_coding	3543
0.0021682	0.00712	52.32	20.85	0.398509	219024_at	PLEKHA1	ENSG00000107679	pleckstrin homology domain containing A1 [Source:HGNC Symbol;Acc:HGNC:14335]	chr10	122374696	122442602	1	q26.13	37.12	protein_coding	23986
4.67e-05	0.000286	24.88	52.69	2.11777	226899_at	UNC5B	ENSG00000107731	unc-5 netrin receptor B [Source:HGNC Symbol;Acc:HGNC:12568]	chr10	71212570	71302864	1	q22.1	54.37	protein_coding	6841
2.37e-05	0.000163	19.63	53.14	2.70708	202524_s_at	SPOCK2	ENSG00000107742	SPARC (osteonectin), cwcv and kazal like domains proteoglycan 2 [Source:HGNC Symbol;Acc:HGNC:13564]	chr10	72059034	72089032	-1	q22.1	55.97	protein_coding	6411
3.93e-05	0.000248	17.55	38.76	2.20855	202523_s_at	SPOCK2	ENSG00000107742	SPARC (osteonectin), cwcv and kazal like domains proteoglycan 2 [Source:HGNC Symbol;Acc:HGNC:13564]	chr10	72059034	72089032	-1	q22.1	55.97	protein_coding	6411
2.6e-06	2.58e-05	698.7	409.08	0.585487	202432_at	PPP3CB	ENSG00000107758	protein phosphatase 3 catalytic subunit beta [Source:HGNC Symbol;Acc:HGNC:9315]	chr10	73436433	73496024	-1	q22.2	38.91	protein_coding	5089
1e-07	1.6e-06	809.5	314.25	0.388203	220974_x_at	SFXN3	ENSG00000107819	sideroflexin 3 [Source:HGNC Symbol;Acc:HGNC:16087]	chr10	101031234	101041244	1	q24.31	54.03	protein_coding	4631
3e-07	4.21e-06	757.83	318.54	0.420332	217226_s_at	SFXN3	ENSG00000107819	sideroflexin 3 [Source:HGNC Symbol;Acc:HGNC:16087]	chr10	101031234	101041244	1	q24.31	54.03	protein_coding	4631
0.0004854	0.00205	7.87	12.83	1.63024	1568598_at	KAZALD1	ENSG00000107821	Kazal type serine peptidase inhibitor domain 1 [Source:HGNC Symbol;Acc:HGNC:25460]	chr10	101061989	101068131	1	q24.31	58.72	protein_coding	4171
1.91e-05	0.000136	46.62	154.27	3.30909	205129_at	NPM3	ENSG00000107833	nucleophosmin/nucleoplasmin 3 [Source:HGNC Symbol;Acc:HGNC:7931]	chr10	101781325	101783413	-1	q24.32	57.44	protein_coding	928
0.0007275	0.00288	76.69	34.37	0.448168	239765_at	CPEB3	ENSG00000107864	cytoplasmic polyadenylation element binding protein 3 [Source:HGNC Symbol;Acc:HGNC:21746]	chr10	92046692	92291078	-1	q23.32	40.86	protein_coding	7919
0.0004242	0.00184	101.41	198.67	1.95908	208952_s_at	LARP4B	ENSG00000107929	La ribonucleoprotein 4B [Source:HGNC Symbol;Acc:HGNC:28987]	chr10	806914	931705	-1	p15.3	42.7	protein_coding	11610
0.0039176	0.0116	151.92	274.83	1.80904	228196_s_at	LARP4B	ENSG00000107929	La ribonucleoprotein 4B [Source:HGNC Symbol;Acc:HGNC:28987]	chr10	806914	931705	-1	p15.3	42.7	protein_coding	11610
3.5e-06	3.3e-05	103.93	235.23	2.26335	218239_s_at	GTPBP4	ENSG00000107937	GTP binding protein 4 [Source:HGNC Symbol;Acc:HGNC:21535]	chr10	988434	1019932	1	p15.3	46.88	protein_coding	6121
1.04e-05	8.21e-05	33.71	74.08	2.19757	218238_at	GTPBP4	ENSG00000107937	GTP binding protein 4 [Source:HGNC Symbol;Acc:HGNC:21535]	chr10	988434	1019932	1	p15.3	46.88	protein_coding	6121
0.0006164	0.0025	28.49	45.29	1.58968	233873_x_at	MTPAP	ENSG00000107951	mitochondrial poly(A) polymerase [Source:HGNC Symbol;Acc:HGNC:25532]	chr10	30309801	30374448	-1	p11.23	43.36	protein_coding	8341
0.0009002	0.00343	42.89	86.86	2.02518	229676_at	MTPAP	ENSG00000107951	mitochondrial poly(A) polymerase [Source:HGNC Symbol;Acc:HGNC:25532]	chr10	30309801	30374448	-1	p11.23	43.36	protein_coding	8341
0.0020981	0.00693	11.75	21.72	1.84851	218947_s_at	MTPAP	ENSG00000107951	mitochondrial poly(A) polymerase [Source:HGNC Symbol;Acc:HGNC:25532]	chr10	30309801	30374448	-1	p11.23	43.36	protein_coding	8341
0.0078702	0.0207	86.59	142.57	1.64649	222794_x_at	MTPAP	ENSG00000107951	mitochondrial poly(A) polymerase [Source:HGNC Symbol;Acc:HGNC:25532]	chr10	30309801	30374448	-1	p11.23	43.36	protein_coding	8341
0.0001407	0.000728	124.7	43.89	0.351965	235421_at	MAP3K8	ENSG00000107968	mitogen-activated protein kinase kinase kinase 8 [Source:HGNC Symbol;Acc:HGNC:6860]	chr10	30434021	30461833	1	p11.23	42.62	protein_coding	3517
0.0045009	0.013	31.63	17.4	0.550111	205027_s_at	MAP3K8	ENSG00000107968	mitogen-activated protein kinase kinase kinase 8 [Source:HGNC Symbol;Acc:HGNC:6860]	chr10	30434021	30461833	1	p11.23	42.62	protein_coding	3517
< 1e-07	< 1e-07	31.47	105.05	3.3381	209080_x_at	GLRX3	ENSG00000108010	glutaredoxin 3 [Source:HGNC Symbol;Acc:HGNC:15987]	chr10	130136391	130184521	1	q26.3	42.15	protein_coding	5189
0.0006803	0.00272	13.02	6.21	0.476959	228194_s_at	SORCS1	ENSG00000108018	sortilin related VPS10 domain containing receptor 1 [Source:HGNC Symbol;Acc:HGNC:16697]	chr10	106573663	107164706	-1	q25.1	40.12	protein_coding	10136
0.0001038	0.000564	56.06	106.08	1.89226	209259_s_at	SMC3	ENSG00000108055	structural maintenance of chromosomes 3 [Source:HGNC Symbol;Acc:HGNC:2468]	chr10	110567695	110606048	1	q25.2	36.7	protein_coding	5683
0.0090087	0.0232	562.11	1041.84	1.85345	209257_s_at	SMC3	ENSG00000108055	structural maintenance of chromosomes 3 [Source:HGNC Symbol;Acc:HGNC:2468]	chr10	110567695	110606048	1	q25.2	36.7	protein_coding	5683
0.0015484	0.00537	25.93	41.58	1.60355	208541_x_at	TFAM	ENSG00000108064	transcription factor A, mitochondrial [Source:HGNC Symbol;Acc:HGNC:11741]	chr10	58385345	58399220	1	q21.1	37.47	protein_coding	5282
0.0075364	0.02	629.66	926.55	1.47151	203177_x_at	TFAM	ENSG00000108064	transcription factor A, mitochondrial [Source:HGNC Symbol;Acc:HGNC:11741]	chr10	58385345	58399220	1	q21.1	37.47	protein_coding	5282
0.0001258	0.000663	38.78	83.74	2.15936	203079_s_at	CUL2	ENSG00000108094	cullin 2 [Source:HGNC Symbol;Acc:HGNC:2552]	chr10	35008551	35090642	-1	p11.21	39.72	protein_coding	5269
0.0018863	0.00634	89.18	153.95	1.72628	224647_at	CCNY	ENSG00000108100	cyclin Y [Source:HGNC Symbol;Acc:HGNC:23354]	chr10	35247025	35572669	1	p11.21	43.24	protein_coding	6108
< 1e-07	< 1e-07	506.53	1109.75	2.19089	224652_at	CCNY	ENSG00000108100	cyclin Y [Source:HGNC Symbol;Acc:HGNC:23354]	chr10	35247025	35572669	1	p11.21	43.24	protein_coding	6108
0.0001179	0.000628	929.08	1486.94	1.60044	212124_at	ZMIZ1	ENSG00000108175	zinc finger MIZ-type containing 1 [Source:HGNC Symbol;Acc:HGNC:16493]	chr10	79068966	79316519	1	q22.3	55.32	protein_coding	10804
5e-07	6.53e-06	52.25	158.64	3.03617	201489_at	PPIF	ENSG00000108179	peptidylprolyl isomerase F [Source:HGNC Symbol;Acc:HGNC:9259]	chr10	79347469	79355334	1	q22.3	55.61	protein_coding	2671
< 1e-07	< 1e-07	12.93	32.97	2.54988	201490_s_at	PPIF	ENSG00000108179	peptidylprolyl isomerase F [Source:HGNC Symbol;Acc:HGNC:9259]	chr10	79347469	79355334	1	q22.3	55.61	protein_coding	2671
8.06e-05	0.000453	32.75	14.26	0.43542	219543_at	PBLD	ENSG00000108187	phenazine biosynthesis like protein domain containing [Source:HGNC Symbol;Acc:HGNC:23301]	chr10	68282660	68333049	-1	q21.3	43.3	protein_coding	5172
0.0025309	0.0081	32	65.16	2.03625	203481_at	SLF2	ENSG00000119906	SMC5-SMC6 complex localization factor 2 [Source:HGNC Symbol;Acc:HGNC:17814]	chr10	100912963	100965134	1	q24.31	38.83	protein_coding	8812
0.0061152	0.0169	396.86	262.22	0.660737	203327_at	IDE	ENSG00000119912	insulin degrading enzyme [Source:HGNC Symbol;Acc:HGNC:5381]	chr10	92451684	92574096	-1	q23.33	40.71	protein_coding	16811
1.34e-05	0.000102	10.81	29.74	2.75116	225424_at	GPAM	ENSG00000119927	glycerol-3-phosphate acyltransferase, mitochondrial [Source:HGNC Symbol;Acc:HGNC:24865]	chr10	112149865	112215377	-1	q25.2	39.93	protein_coding	9809
0.0010073	0.00377	51.6	137.28	2.66047	225420_at	GPAM	ENSG00000119927	glycerol-3-phosphate acyltransferase, mitochondrial [Source:HGNC Symbol;Acc:HGNC:24865]	chr10	112149865	112215377	-1	q25.2	39.93	protein_coding	9809
0.0006567	0.00264	68.22	31.44	0.460862	228384_s_at	PYROXD2	ENSG00000119943	pyridine nucleotide-disulphide oxidoreductase domain 2 [Source:HGNC Symbol;Acc:HGNC:23517]	chr10	98383565	98415182	-1	q24.2	50.39	protein_coding	3865
0.0001713	0.000859	1220.51	1722.49	1.41129	200071_at	SMNDC1	ENSG00000119953	survival motor neuron domain containing 1 [Source:HGNC Symbol;Acc:HGNC:16900]	chr10	110290730	110304938	-1	q25.2	37.32	protein_coding	5404
4e-07	5.38e-06	14.99	71.6	4.77652	223556_at	HELLS	ENSG00000119969	helicase, lymphoid specific [Source:HGNC Symbol;Acc:HGNC:4861]	chr10	94501434	94613905	1	q23.33	38.96	protein_coding	10150
0.0002804	0.0013	90.89	196.85	2.1658	227350_at	HELLS	ENSG00000119969	helicase, lymphoid specific [Source:HGNC Symbol;Acc:HGNC:4861]	chr10	94501434	94613905	1	q23.33	38.96	protein_coding	10150
0.007136	0.0192	6.28	11.03	1.75637	227349_at	HELLS	ENSG00000119969	helicase, lymphoid specific [Source:HGNC Symbol;Acc:HGNC:4861]	chr10	94501434	94613905	1	q23.33	38.96	protein_coding	10150
0.0006313	0.00255	53.83	96.47	1.79212	225351_at	DENND10	ENSG00000119979	DENN domain containing 10 [Source:HGNC Symbol;Acc:HGNC:31793]	chr10	119104086	119137984	1	q26.11	45.15	protein_coding	6291
0.0065256	0.0178	729.51	445.99	0.611356	221804_s_at	DENND10	ENSG00000119979	DENN domain containing 10 [Source:HGNC Symbol;Acc:HGNC:31793]	chr10	119104086	119137984	1	q26.11	45.15	protein_coding	6291
< 1e-07	< 1e-07	43.91	4.93	0.112275	1557544_at	CFAP58	ENSG00000120051	cilia and flagella associated protein 58 [Source:HGNC Symbol;Acc:HGNC:26676]	chr10	104353833	104455102	1	q25.1	39.87	protein_coding	3491
9e-07	1.07e-05	141.54	56.46	0.398898	220152_at	C10orf95	ENSG00000120055	chromosome 10 open reading frame 95 [Source:HGNC Symbol;Acc:HGNC:25880]	chr10	102449837	102451543	-1	q24.32	67.6	protein_coding	1469
3.7e-06	3.46e-05	13.89	37.48	2.69834	228468_at	MASTL	ENSG00000120539	microtubule associated serine/threonine kinase like [Source:HGNC Symbol;Acc:HGNC:19042]	chr10	27154824	27187953	1	p12.1	41.56	protein_coding	4660
0.0001006	0.000549	63.86	26.23	0.410742	232762_at	KIAA1217	ENSG00000120549	KIAA1217 [Source:HGNC Symbol;Acc:HGNC:25428]	chr10	23694746	24547848	1	p12.2	40.56	protein_coding	10807
0.0002675	0.00124	111.9	49.84	0.445398	232046_at	KIAA1217	ENSG00000120549	KIAA1217 [Source:HGNC Symbol;Acc:HGNC:25428]	chr10	23694746	24547848	1	p12.2	40.56	protein_coding	10807
3.36e-05	0.000218	280.72	66.51	0.236926	214807_at	PLXDC2	ENSG00000120594	plexin domain containing 2 [Source:HGNC Symbol;Acc:HGNC:21013]	chr10	19816239	20289856	1	p12.31	37.34	protein_coding	12567
7.33e-05	0.000419	220.95	77.62	0.351301	226865_at	PLXDC2	ENSG00000120594	plexin domain containing 2 [Source:HGNC Symbol;Acc:HGNC:21013]	chr10	19816239	20289856	1	p12.31	37.34	protein_coding	12567
0.0007215	0.00286	63.11	21.35	0.338298	238455_at	PLXDC2	ENSG00000120594	plexin domain containing 2 [Source:HGNC Symbol;Acc:HGNC:21013]	chr10	19816239	20289856	1	p12.31	37.34	protein_coding	12567
0.0007807	0.00305	40.69	22.23	0.546326	227995_at	PLXDC2	ENSG00000120594	plexin domain containing 2 [Source:HGNC Symbol;Acc:HGNC:21013]	chr10	19816239	20289856	1	p12.31	37.34	protein_coding	12567
0.0026565	0.00843	252.88	111.48	0.440842	227276_at	PLXDC2	ENSG00000120594	plexin domain containing 2 [Source:HGNC Symbol;Acc:HGNC:21013]	chr10	19816239	20289856	1	p12.31	37.34	protein_coding	12567
0.0002958	0.00136	701.8	422.94	0.60265	214783_s_at	ANXA11	ENSG00000122359	annexin A11 [Source:HGNC Symbol;Acc:HGNC:535]	chr10	80150889	80205572	-1	q22.3	50.39	protein_coding	8513
3.87e-05	0.000245	144.59	244.52	1.69113	224435_at	PRXL2A	ENSG00000122378	peroxiredoxin like 2A [Source:HGNC Symbol;Acc:HGNC:28651]	chr10	80407829	80437115	1	q23.1	47.5	protein_coding	6520
0.0021218	0.007	311.02	510.86	1.64253	228155_at	PRXL2A	ENSG00000122378	peroxiredoxin like 2A [Source:HGNC Symbol;Acc:HGNC:28651]	chr10	80407829	80437115	1	q23.1	47.5	protein_coding	6520
0.0025447	0.00814	59.99	120.82	2.014	232662_x_at	PRXL2A	ENSG00000122378	peroxiredoxin like 2A [Source:HGNC Symbol;Acc:HGNC:28651]	chr10	80407829	80437115	1	q23.1	47.5	protein_coding	6520
2.2e-06	2.25e-05	7.34	22.32	3.04087	205479_s_at	PLAU	ENSG00000122861	plasminogen activator, urokinase [Source:HGNC Symbol;Acc:HGNC:9052]	chr10	73909177	73917496	1	q22.2	53.5	protein_coding	2949
0.0033089	0.0101	11.6	7.46	0.643103	209834_at	CHST3	ENSG00000122863	carbohydrate sulfotransferase 3 [Source:HGNC Symbol;Acc:HGNC:1971]	chr10	71964395	72013558	1	q22.1	51.37	protein_coding	6934
1.3e-06	1.45e-05	213.98	29.79	0.139219	213429_at	BICC1	ENSG00000122870	BicC family RNA binding protein 1 [Source:HGNC Symbol;Acc:HGNC:19351]	chr10	58512872	58831435	1	q21.1	38	protein_coding	6835
0.00126	0.00452	136.51	202.19	1.48114	218597_s_at	CISD1	ENSG00000122873	CDGSH iron sulfur domain 1 [Source:HGNC Symbol;Acc:HGNC:30880]	chr10	58269162	58289586	1	q21.1	36.69	protein_coding	2753
0.0046991	0.0135	432.18	303.9	0.703179	207543_s_at	P4HA1	ENSG00000122884	prolyl 4-hydroxylase subunit alpha 1 [Source:HGNC Symbol;Acc:HGNC:8546]	chr10	73007217	73096974	-1	q22.1	38.79	protein_coding	3093
7e-07	8.64e-06	4.91	9.35	1.90428	209910_at	SLC25A16	ENSG00000122912	solute carrier family 25 member 16 [Source:HGNC Symbol;Acc:HGNC:10986]	chr10	68477998	68527523	-1	q21.3	43.38	protein_coding	7865
< 1e-07	< 1e-07	15.57	46.66	2.99679	214140_at	SLC25A16	ENSG00000122912	solute carrier family 25 member 16 [Source:HGNC Symbol;Acc:HGNC:10986]	chr10	68477998	68527523	-1	q21.3	43.38	protein_coding	7865
< 1e-07	< 1e-07	61.36	741.45	12.0836	204026_s_at	ZWINT	ENSG00000122952	ZW10 interacting kinetochore protein [Source:HGNC Symbol;Acc:HGNC:13195]	chr10	56357227	56361273	-1	q21.1	48.04	protein_coding	2377
0.0010505	0.0039	443.96	726.05	1.6354	201807_at	VPS26A	ENSG00000122958	VPS26, retromer complex component A [Source:HGNC Symbol;Acc:HGNC:12711]	chr10	69123512	69174412	1	q22.1	39.83	protein_coding	5116
0.0011696	0.00425	278.7	506.81	1.81848	202074_s_at	OPTN	ENSG00000123240	optineurin [Source:HGNC Symbol;Acc:HGNC:17142]	chr10	13099449	13138308	1	p13	42.4	protein_coding	5138
0.0047318	0.0136	62.24	39.05	0.62741	202477_s_at	TUBGCP2	ENSG00000130640	tubulin gamma complex associated protein 2 [Source:HGNC Symbol;Acc:HGNC:18599]	chr10	133278635	133318823	-1	q26.3	55.7	protein_coding	14147
< 1e-07	< 1e-07	162.89	13.17	0.0808521	239733_at	DYDC2	ENSG00000133665	DPY30 domain containing 2 [Source:HGNC Symbol;Acc:HGNC:23468]	chr10	80344745	80368073	1	q23.1	43.12	protein_coding	2465
0.002104	0.00695	63.69	36.71	0.576386	224683_at	FBH1	ENSG00000134452	F-box DNA helicase 1 [Source:HGNC Symbol;Acc:HGNC:13620]	chr10	5890203	5937594	1	p15.1	45.82	protein_coding	6676
0.0015443	0.00536	33.33	53.62	1.60876	203544_s_at	STAM	ENSG00000136738	signal transducing adaptor molecule [Source:HGNC Symbol;Acc:HGNC:11357]	chr10	17644151	17716824	1	p12.33	37.1	protein_coding	4130
4.99e-05	0.000302	68.08	121.05	1.77806	216304_x_at	YME1L1	ENSG00000136758	YME1 like 1 ATPase [Source:HGNC Symbol;Acc:HGNC:12843]	chr10	27110111	27155266	-1	p12.1	38.36	protein_coding	7336
0.0001109	0.000597	95.33	176.81	1.85472	201351_s_at	YME1L1	ENSG00000136758	YME1 like 1 ATPase [Source:HGNC Symbol;Acc:HGNC:12843]	chr10	27110111	27155266	-1	p12.1	38.36	protein_coding	7336
0.000689	0.00275	7.17	22.56	3.14644	217143_s_at	YME1L1	ENSG00000136758	YME1 like 1 ATPase [Source:HGNC Symbol;Acc:HGNC:12843]	chr10	27110111	27155266	-1	p12.1	38.36	protein_coding	7336
0.0022	0.00721	6.9	15.27	2.21304	213830_at	YME1L1	ENSG00000136758	YME1 like 1 ATPase [Source:HGNC Symbol;Acc:HGNC:12843]	chr10	27110111	27155266	-1	p12.1	38.36	protein_coding	7336
2e-07	2.96e-06	12.61	40.48	3.21015	219745_at	MFSD13A	ENSG00000138111	major facilitator superfamily domain containing 13A [Source:HGNC Symbol;Acc:HGNC:26196]	chr10	102461395	102477045	1	q24.32	53.46	protein_coding	3526
< 1e-07	1.6e-06	25.95	7.06	0.272062	208147_s_at	CYP2C8	ENSG00000138115	cytochrome P450 family 2 subfamily C member 8 [Source:HGNC Symbol;Acc:HGNC:2622]	chr10	95036772	95069497	-1	q23.33	37.59	protein_coding	2509
4.9e-06	4.34e-05	121.47	41.67	0.343048	217518_at	MYOF	ENSG00000138119	myoferlin [Source:HGNC Symbol;Acc:HGNC:3656]	chr10	93306429	93482334	-1	q23.33	44.36	protein_coding	8490
0.0001149	0.000615	413.88	203.91	0.492679	201798_s_at	MYOF	ENSG00000138119	myoferlin [Source:HGNC Symbol;Acc:HGNC:3656]	chr10	93306429	93482334	-1	q23.33	44.36	protein_coding	8490
0.0026391	0.00838	71.77	27.69	0.385816	227145_at	LOXL4	ENSG00000138131	lysyl oxidase like 4 [Source:HGNC Symbol;Acc:HGNC:17171]	chr10	98247690	98268194	-1	q24.2	53.19	protein_coding	3597
< 1e-07	< 1e-07	28.21	352.03	12.4789	204444_at	KIF11	ENSG00000138160	kinesin family member 11 [Source:HGNC Symbol;Acc:HGNC:6388]	chr10	92574105	92655395	1	q23.33	40.82	protein_coding	5322
7e-07	8.64e-06	628.27	166.16	0.264472	202289_s_at	TACC2	ENSG00000138162	transforming acidic coiled-coil containing protein 2 [Source:HGNC Symbol;Acc:HGNC:11523]	chr10	121989163	122254545	1	q26.13	48.29	protein_coding	18855
0.0013024	0.00465	68.66	29.98	0.436644	211382_s_at	TACC2	ENSG00000138162	transforming acidic coiled-coil containing protein 2 [Source:HGNC Symbol;Acc:HGNC:11523]	chr10	121989163	122254545	1	q26.13	48.29	protein_coding	18855
0.0037863	0.0113	14.05	23.92	1.70249	221565_s_at	CALHM2	ENSG00000138172	calcium homeostasis modulator family member 2 [Source:HGNC Symbol;Acc:HGNC:23493]	chr10	103446786	103452402	-1	q24.33	55.67	protein_coding	3108
0.0001337	0.000697	25.68	16.3	0.634735	1568590_at	ARL3	ENSG00000138175	ADP ribosylation factor like GTPase 3 [Source:HGNC Symbol;Acc:HGNC:694]	chr10	102673731	102714397	-1	q24.32	44.56	protein_coding	3834
0.0033413	0.0102	196.47	120.16	0.611595	202641_at	ARL3	ENSG00000138175	ADP ribosylation factor like GTPase 3 [Source:HGNC Symbol;Acc:HGNC:694]	chr10	102673731	102714397	-1	q24.32	44.56	protein_coding	3834
< 1e-07	< 1e-07	46.49	1083.92	23.3151	218542_at	CEP55	ENSG00000138180	centrosomal protein 55 [Source:HGNC Symbol;Acc:HGNC:1161]	chr10	93496612	93529092	1	q23.33	40.69	protein_coding	3291
1.1e-06	1.27e-05	75.94	184.86	2.43429	205235_s_at	KIF20B	ENSG00000138182	kinesin family member 20B [Source:HGNC Symbol;Acc:HGNC:7212]	chr10	89701590	89774939	1	q23.31	35.16	protein_coding	6871
1.82e-05	0.000131	61.34	18.26	0.297685	205111_s_at	PLCE1	ENSG00000138193	phospholipase C epsilon 1 [Source:HGNC Symbol;Acc:HGNC:17175]	chr10	93993931	94332823	1	q23.33	41.12	protein_coding	13679
0.00062	0.00251	31.22	11.69	0.374439	205112_at	PLCE1	ENSG00000138193	phospholipase C epsilon 1 [Source:HGNC Symbol;Acc:HGNC:17175]	chr10	93993931	94332823	1	q23.33	41.12	protein_coding	13679
0.0001752	0.000876	142.18	262.49	1.84618	219336_s_at	ASCC1	ENSG00000138303	activating signal cointegrator 1 complex subunit 1 [Source:HGNC Symbol;Acc:HGNC:24268]	chr10	72096032	72217134	-1	q22.1	41.33	protein_coding	5916
0.0017906	0.00607	8.81	16.09	1.82633	1554627_a_at	ASCC1	ENSG00000138303	activating signal cointegrator 1 complex subunit 1 [Source:HGNC Symbol;Acc:HGNC:24268]	chr10	72096032	72217134	-1	q22.1	41.33	protein_coding	5916
0.006988	0.0188	104.36	196.11	1.87917	1555878_at	RPS24	ENSG00000138326	ribosomal protein S24 [Source:HGNC Symbol;Acc:HGNC:10411]	chr10	78033760	78056813	1	q22.3	47.43	protein_coding	7829
1e-07	1.6e-06	14.64	51.86	3.54235	213647_at	DNA2	ENSG00000138346	DNA replication helicase/nuclease 2 [Source:HGNC Symbol;Acc:HGNC:2939]	chr10	68414064	68472121	-1	q21.3	42.26	protein_coding	4925
0.0007834	0.00306	37.69	16.98	0.450517	219451_at	MSRB2	ENSG00000148450	methionine sulfoxide reductase B2 [Source:HGNC Symbol;Acc:HGNC:17061]	chr10	23095579	23122013	1	p12.2	42.98	protein_coding	1979
0.0054715	0.0153	73.9	116.86	1.58133	220865_s_at	PDSS1	ENSG00000148459	decaprenyl diphosphate synthase subunit 1 [Source:HGNC Symbol;Acc:HGNC:17759]	chr10	26697701	26746798	1	p12.1	44.16	protein_coding	1913
0.0002215	0.00107	949	1352.35	1.42503	212771_at	FAM171A1	ENSG00000148468	family with sequence similarity 171 member A1 [Source:HGNC Symbol;Acc:HGNC:23522]	chr10	15211643	15371289	-1	p13	45.04	protein_coding	4182
0.0002374	0.00113	39.65	23.61	0.59546	218297_at	MINDY3	ENSG00000148481	MINDY lysine 48 deubiquitinase 3 [Source:HGNC Symbol;Acc:HGNC:23578]	chr10	15778170	15860507	-1	p13	35.88	protein_coding	4081
1.74e-05	0.000126	60.88	120.31	1.97618	201980_s_at	RSU1	ENSG00000148484	Ras suppressor protein 1 [Source:HGNC Symbol;Acc:HGNC:10464]	chr10	16590611	16817463	-1	p13	41.14	protein_coding	4126
< 1e-07	< 1e-07	284.12	29.76	0.104744	1554547_at	FAM13C	ENSG00000148541	family with sequence similarity 13 member C [Source:HGNC Symbol;Acc:HGNC:19371]	chr10	59246130	59363181	-1	q21.1	40.06	protein_coding	6752
3.69e-05	0.000236	9.53	17.95	1.88353	221803_s_at	NRBF2	ENSG00000148572	nuclear receptor binding factor 2 [Source:HGNC Symbol;Acc:HGNC:19692]	chr10	63133247	63155031	1	q21.3	42.23	protein_coding	1901
6.8e-05	0.000394	8.47	14.78	1.74498	223650_s_at	NRBF2	ENSG00000148572	nuclear receptor binding factor 2 [Source:HGNC Symbol;Acc:HGNC:19692]	chr10	63133247	63155031	1	q21.3	42.23	protein_coding	1901
0.0006601	0.00265	10.91	18.16	1.66453	227872_at	POLR3A	ENSG00000148606	RNA polymerase III subunit A [Source:HGNC Symbol;Acc:HGNC:30074]	chr10	77969251	78029515	-1	q22.3	44.69	protein_coding	8887
0.0048627	0.0139	109.49	193.27	1.76518	231763_at	POLR3A	ENSG00000148606	RNA polymerase III subunit A [Source:HGNC Symbol;Acc:HGNC:30074]	chr10	77969251	78029515	-1	q22.3	44.69	protein_coding	8887
0.0035002	0.0106	16.77	25.33	1.51044	223703_at	LRMDA	ENSG00000148655	leucine rich melanocyte differentiation associated [Source:HGNC Symbol;Acc:HGNC:23405]	chr10	75431624	76560168	1	q22.2	41.11	protein_coding	6390
0.0026856	0.00851	347.52	215.01	0.618698	226398_s_at	FRA10AC1	ENSG00000148690	FRA10A associated CGG repeat 1 [Source:HGNC Symbol;Acc:HGNC:1162]	chr10	93667883	93702592	-1	q23.33	34.84	protein_coding	8162
0.000502	0.00211	479.22	264.17	0.55125	201752_s_at	ADD3	ENSG00000148700	adducin 3 [Source:HGNC Symbol;Acc:HGNC:245]	chr10	109996368	110135565	1	q25.1	38.65	protein_coding	6539
0.0008296	0.00321	412.81	222.96	0.540103	205882_x_at	ADD3	ENSG00000148700	adducin 3 [Source:HGNC Symbol;Acc:HGNC:245]	chr10	109996368	110135565	1	q25.1	38.65	protein_coding	6539
4.25e-05	0.000264	319.09	619.78	1.94234	208770_s_at	EIF4EBP2	ENSG00000148730	eukaryotic translation initiation factor 4E binding protein 2 [Source:HGNC Symbol;Acc:HGNC:3289]	chr10	70404145	70428618	1	q22.1	43.97	protein_coding	7491
0.0018821	0.00633	112.01	71.42	0.637622	212762_s_at	TCF7L2	ENSG00000148737	transcription factor 7 like 2 [Source:HGNC Symbol;Acc:HGNC:11641]	chr10	112950247	113167678	1	q25.2	44.6	protein_coding	6739
0.0044857	0.013	21.96	10.99	0.500455	236094_at	TCF7L2	ENSG00000148737	transcription factor 7 like 2 [Source:HGNC Symbol;Acc:HGNC:11641]	chr10	112950247	113167678	1	q25.2	44.6	protein_coding	6739
0.0079331	0.0209	396.31	276.86	0.698595	216511_s_at	TCF7L2	ENSG00000148737	transcription factor 7 like 2 [Source:HGNC Symbol;Acc:HGNC:11641]	chr10	112950247	113167678	1	q25.2	44.6	protein_coding	6739
< 1e-07	< 1e-07	7.19	49.03	6.81919	212022_s_at	MKI67	ENSG00000148773	marker of proliferation Ki-67 [Source:HGNC Symbol;Acc:HGNC:7107]	chr10	128096659	128126423	-1	q26.2	43.55	protein_coding	12845
< 1e-07	< 1e-07	10.28	61.76	6.00778	212023_s_at	MKI67	ENSG00000148773	marker of proliferation Ki-67 [Source:HGNC Symbol;Acc:HGNC:7107]	chr10	128096659	128126423	-1	q26.2	43.55	protein_coding	12845
< 1e-07	< 1e-07	5.4	30.33	5.61667	212020_s_at	MKI67	ENSG00000148773	marker of proliferation Ki-67 [Source:HGNC Symbol;Acc:HGNC:7107]	chr10	128096659	128126423	-1	q26.2	43.55	protein_coding	12845
1.76e-05	0.000127	8.99	16.87	1.87653	230259_at	FUOM	ENSG00000148803	fucose mutarotase [Source:HGNC Symbol;Acc:HGNC:24733]	chr10	133355158	133358025	-1	q26.3	67.02	protein_coding	1270
2e-07	2.96e-06	18.99	8.98	0.47288	1558483_at	LRRC27	ENSG00000148814	leucine rich repeat containing 27 [Source:HGNC Symbol;Acc:HGNC:29346]	chr10	132332154	132381508	1	q26.3	51.67	protein_coding	11500
3.7e-06	3.46e-05	76.24	27.27	0.357686	228886_at	LRRC27	ENSG00000148814	leucine rich repeat containing 27 [Source:HGNC Symbol;Acc:HGNC:29346]	chr10	132332154	132381508	1	q26.3	51.67	protein_coding	11500
0.00645	0.0176	17.38	11.02	0.634062	1558484_s_at	LRRC27	ENSG00000148814	leucine rich repeat containing 27 [Source:HGNC Symbol;Acc:HGNC:29346]	chr10	132332154	132381508	1	q26.3	51.67	protein_coding	11500
0.0002605	0.00122	71.8	131.19	1.82716	1557915_s_at	GSTO1	ENSG00000148834	glutathione S-transferase omega 1 [Source:HGNC Symbol;Acc:HGNC:13312]	chr10	104235356	104267459	1	q25.1	41.43	protein_coding	1691
4.15e-05	0.000259	202.11	485.78	2.40354	210053_at	TAF5	ENSG00000148835	TATA-box binding protein associated factor 5 [Source:HGNC Symbol;Acc:HGNC:11539]	chr10	103367976	103389065	1	q24.33	43.35	protein_coding	3259
5.73e-05	0.00034	32.63	82.43	2.5262	1553528_a_at	TAF5	ENSG00000148835	TATA-box binding protein associated factor 5 [Source:HGNC Symbol;Acc:HGNC:11539]	chr10	103367976	103389065	1	q24.33	43.35	protein_coding	3259
6.83e-05	0.000395	26.39	15.27	0.578628	209874_x_at	CNNM2	ENSG00000148842	cyclin and CBS domain divalent metal cation transport mediator 2 [Source:HGNC Symbol;Acc:HGNC:103]	chr10	102918294	103090222	1	q24.32	42.59	protein_coding	16324
0.0002424	0.00115	19.13	10.5	0.548876	206818_s_at	CNNM2	ENSG00000148842	cyclin and CBS domain divalent metal cation transport mediator 2 [Source:HGNC Symbol;Acc:HGNC:103]	chr10	102918294	103090222	1	q24.32	42.59	protein_coding	16324
0.001453	0.0051	7.26	14.54	2.00275	226777_at	ADAM12	ENSG00000148848	ADAM metallopeptidase domain 12 [Source:HGNC Symbol;Acc:HGNC:190]	chr10	126012381	126388477	-1	q26.2	43.11	protein_coding	9882
0.0045342	0.0131	658.19	990.33	1.50463	214000_s_at	RGS10	ENSG00000148908	regulator of G protein signaling 10 [Source:HGNC Symbol;Acc:HGNC:9992]	chr10	119499817	119542719	-1	q26.11	49.42	protein_coding	1274
0.0084023	0.0219	875.69	1285.66	1.46817	204319_s_at	RGS10	ENSG00000148908	regulator of G protein signaling 10 [Source:HGNC Symbol;Acc:HGNC:9992]	chr10	119499817	119542719	-1	q26.11	49.42	protein_coding	1274
0.0061575	0.017	159.65	61.14	0.382963	239468_at	MKX	ENSG00000150051	mohawk homeobox [Source:HGNC Symbol;Acc:HGNC:23729]	chr10	27672874	27746060	-1	p12.1	40.22	protein_coding	4107
0.0057171	0.0159	7.74	13.35	1.72481	238451_at	MPP7	ENSG00000150054	membrane palmitoylated protein 7 [Source:HGNC Symbol;Acc:HGNC:26542]	chr10	28050993	28334486	-1	p12.1	38.78	protein_coding	6371
0.0027514	0.00868	49.62	88.95	1.79262	1553678_a_at	ITGB1	ENSG00000150093	integrin subunit beta 1 [Source:HGNC Symbol;Acc:HGNC:6153]	chr10	32887273	33005792	-1	p11.22	39.16	protein_coding	14561
< 1e-07	< 1e-07	327.41	8.4	0.0256559	237314_at	ENKUR	ENSG00000151023	enkurin, TRPC channel interacting protein [Source:HGNC Symbol;Acc:HGNC:28388]	chr10	24981979	25062279	-1	p12.1	38.61	protein_coding	4076
0.0003004	0.00137	5.08	15.19	2.99016	232195_at	GPR158	ENSG00000151025	G protein-coupled receptor 158 [Source:HGNC Symbol;Acc:HGNC:23689]	chr10	25174802	25602229	1	p12.1	36.98	protein_coding	7989
1.3e-06	1.45e-05	107.11	24.81	0.231631	207950_s_at	ANK3	ENSG00000151150	ankyrin 3 [Source:HGNC Symbol;Acc:HGNC:494]	chr10	60026298	60733490	-1	q21.2	37.75	protein_coding	25759
< 1e-07	< 1e-07	397.62	128.59	0.323399	206385_s_at	ANK3	ENSG00000151150	ankyrin 3 [Source:HGNC Symbol;Acc:HGNC:494]	chr10	60026298	60733490	-1	q21.2	37.75	protein_coding	25759
< 1e-07	< 1e-07	125.21	40.11	0.320342	209442_x_at	ANK3	ENSG00000151150	ankyrin 3 [Source:HGNC Symbol;Acc:HGNC:494]	chr10	60026298	60733490	-1	q21.2	37.75	protein_coding	25759
< 1e-07	< 1e-07	57.56	13.42	0.233148	239726_at	ANK3	ENSG00000151150	ankyrin 3 [Source:HGNC Symbol;Acc:HGNC:494]	chr10	60026298	60733490	-1	q21.2	37.75	protein_coding	25759
< 1e-07	< 1e-07	58.33	11.68	0.20024	238786_at	ANK3	ENSG00000151150	ankyrin 3 [Source:HGNC Symbol;Acc:HGNC:494]	chr10	60026298	60733490	-1	q21.2	37.75	protein_coding	25759
0.000596	0.00243	136.38	219.73	1.61116	201725_at	CDC123	ENSG00000151465	cell division cycle 123 [Source:HGNC Symbol;Acc:HGNC:16827]	chr10	12195965	12250589	1	p14	42.91	protein_coding	2298
< 1e-07	1.6e-06	166.23	63.84	0.384046	225163_at	FRMD4A	ENSG00000151474	FERM domain containing 4A [Source:HGNC Symbol;Acc:HGNC:25491]	chr10	13643706	14462142	-1	p13	43.78	protein_coding	14686
0.0004075	0.00178	105.68	37.38	0.353709	225167_at	FRMD4A	ENSG00000151474	FERM domain containing 4A [Source:HGNC Symbol;Acc:HGNC:25491]	chr10	13643706	14462142	-1	p13	43.78	protein_coding	14686
0.000541	0.00224	103.49	39.44	0.3811	225168_at	FRMD4A	ENSG00000151474	FERM domain containing 4A [Source:HGNC Symbol;Acc:HGNC:25491]	chr10	13643706	14462142	-1	p13	43.78	protein_coding	14686
0.0072015	0.0193	16.32	9.44	0.578431	208475_at	FRMD4A	ENSG00000151474	FERM domain containing 4A [Source:HGNC Symbol;Acc:HGNC:25491]	chr10	13643706	14462142	-1	p13	43.78	protein_coding	14686
0.0002522	0.00119	96.27	198.6	2.06295	242356_at	VTI1A	ENSG00000151532	vesicle transport through interaction with t-SNAREs 1A [Source:HGNC Symbol;Acc:HGNC:17792]	chr10	112446998	112818744	1	q25.2	39.1	protein_coding	8408
0.0028265	0.00887	15.63	28.89	1.84837	205180_s_at	ADAM8	ENSG00000151651	ADAM metallopeptidase domain 8 [Source:HGNC Symbol;Acc:HGNC:215]	chr10	133262420	133276868	-1	q26.3	63.79	protein_coding	4763
0.0001001	0.000547	17.23	31.83	1.84736	227136_s_at	CACUL1	ENSG00000151893	CDK2 associated cullin domain 1 [Source:HGNC Symbol;Acc:HGNC:23727]	chr10	118674167	118755249	-1	q26.11	39.56	protein_coding	12406
0.0019057	0.00639	20.28	32.84	1.61933	227257_s_at	CACUL1	ENSG00000151893	CDK2 associated cullin domain 1 [Source:HGNC Symbol;Acc:HGNC:23727]	chr10	118674167	118755249	-1	q26.11	39.56	protein_coding	12406
0.0012737	0.00456	154.49	92.75	0.600362	230350_at	TIAL1	ENSG00000151923	TIA1 cytotoxic granule associated RNA binding protein like 1 [Source:HGNC Symbol;Acc:HGNC:11804]	chr10	119571802	119597029	-1	q26.11	38.16	protein_coding	7355
1e-07	1.6e-06	18.62	86.4	4.64017	1554572_a_at	SUV39H2	ENSG00000152455	suppressor of variegation 3-9 homolog 2 [Source:HGNC Symbol;Acc:HGNC:17287]	chr10	14878820	14904315	1	p13	39.96	protein_coding	3565
8.18e-05	0.000458	60.33	113.84	1.88696	222233_s_at	DCLRE1C	ENSG00000152457	DNA cross-link repair 1C [Source:HGNC Symbol;Acc:HGNC:17642]	chr10	14897359	14954432	-1	p13	41.86	protein_coding	9592
0.0040842	0.012	58.18	84.69	1.45565	239376_at	DCLRE1C	ENSG00000152457	DNA cross-link repair 1C [Source:HGNC Symbol;Acc:HGNC:17642]	chr10	14897359	14954432	-1	p13	41.86	protein_coding	9592
0.0009373	0.00355	70.24	121.13	1.72452	205005_s_at	NMT2	ENSG00000152465	N-myristoyltransferase 2 [Source:HGNC Symbol;Acc:HGNC:7858]	chr10	15102584	15168693	-1	p13	43.09	protein_coding	6470
0.0004243	0.00184	5.95	14.14	2.37647	238439_at	ANKRD22	ENSG00000152766	ankyrin repeat domain 22 [Source:HGNC Symbol;Acc:HGNC:28321]	chr10	88819896	88851844	-1	q23.31	37.87	protein_coding	3995
1.38e-05	0.000104	68.11	245.38	3.6027	226649_at	PANK1	ENSG00000152782	pantothenate kinase 1 [Source:HGNC Symbol;Acc:HGNC:8598]	chr10	89582988	89645418	-1	q23.31	39.95	protein_coding	3993
0.0011008	0.00405	7.45	17.52	2.35168	204689_at	HHEX	ENSG00000152804	hematopoietically expressed homeobox [Source:HGNC Symbol;Acc:HGNC:4901]	chr10	92689955	92695647	1	q23.33	46.36	protein_coding	2522
0.0009577	0.00362	62.58	130.61	2.08709	201457_x_at	BUB3	ENSG00000154473	BUB3 mitotic checkpoint protein [Source:HGNC Symbol;Acc:HGNC:1151]	chr10	123154402	123170467	1	q26.13	39.16	protein_coding	8175
0.0011362	0.00416	16.76	29.83	1.77983	209345_s_at	PI4K2A	ENSG00000155252	phosphatidylinositol 4-kinase type 2 alpha [Source:HGNC Symbol;Acc:HGNC:30031]	chr10	97640686	97676434	1	q24.2	44.74	protein_coding	4189
0.0001274	0.000669	313.16	197.63	0.631083	225218_at	ZFYVE27	ENSG00000155256	zinc finger FYVE-type containing 27 [Source:HGNC Symbol;Acc:HGNC:26559]	chr10	97737121	97760907	1	q24.2	48.53	protein_coding	3899
1.81e-05	0.00013	53.9	257.16	4.77106	226459_at	PIK3AP1	ENSG00000155629	phosphoinositide-3-kinase adaptor protein 1 [Source:HGNC Symbol;Acc:HGNC:30034]	chr10	96593315	96720514	-1	q24.1	44.36	protein_coding	5688
< 1e-07	< 1e-07	473.48	75.82	0.160133	229170_s_at	CFAP70	ENSG00000156042	cilia and flagella associated protein 70 [Source:HGNC Symbol;Acc:HGNC:30726]	chr10	73253759	73358859	-1	q22.2	39.86	protein_coding	7432
< 1e-07	< 1e-07	326.54	12.5	0.0382801	229169_at	CFAP70	ENSG00000156042	cilia and flagella associated protein 70 [Source:HGNC Symbol;Acc:HGNC:30726]	chr10	73253759	73358859	-1	q22.2	39.86	protein_coding	7432
0.0007343	0.0029	82.72	28.6	0.345745	221583_s_at	KCNMA1	ENSG00000156113	potassium calcium-activated channel subfamily M alpha 1 [Source:HGNC Symbol;Acc:HGNC:6284]	chr10	76869601	77638369	-1	q22.3	43.94	protein_coding	39437
0.0011551	0.00421	228.08	94.34	0.413627	221584_s_at	KCNMA1	ENSG00000156113	potassium calcium-activated channel subfamily M alpha 1 [Source:HGNC Symbol;Acc:HGNC:6284]	chr10	76869601	77638369	-1	q22.3	43.94	protein_coding	39437
0.0012886	0.00461	28.48	49.99	1.75527	224326_s_at	PCGF6	ENSG00000156374	polycomb group ring finger 6 [Source:HGNC Symbol;Acc:HGNC:21156]	chr10	103302796	103351144	-1	q24.33	43.9	protein_coding	3008
0.0046751	0.0135	6.77	10.93	1.61448	238794_at	SFR1	ENSG00000156384	SWI5 dependent homologous recombination repair protein 1 [Source:HGNC Symbol;Acc:HGNC:29574]	chr10	104122058	104126385	1	q25.1	37.96	protein_coding	1806
0.0005073	0.00212	76	33.63	0.4425	227614_at	HKDC1	ENSG00000156510	hexokinase domain containing 1 [Source:HGNC Symbol;Acc:HGNC:23302]	chr10	69220332	69267552	1	q22.1	47.95	protein_coding	4223
5e-07	6.53e-06	138.71	69.09	0.49809	200697_at	HK1	ENSG00000156515	hexokinase 1 [Source:HGNC Symbol;Acc:HGNC:4922]	chr10	69269984	69401884	1	q22.1	47.64	protein_coding	6293
< 1e-07	< 1e-07	208.59	8	0.0383527	240275_at	ARMC3	ENSG00000165309	armadillo repeat containing 3 [Source:HGNC Symbol;Acc:HGNC:30964]	chr10	22928024	23038523	1	p12.2	38.55	protein_coding	6999
0.0066164	0.018	1254.08	1957.55	1.56095	231035_s_at	OTUD1	ENSG00000165312	OTU deubiquitinase 1 [Source:HGNC Symbol;Acc:HGNC:27346]	chr10	23439075	23442377	1	p12.2	53.28	protein_coding	3303
0.0087198	0.0225	1166.13	1842.45	1.57997	226140_s_at	OTUD1	ENSG00000165312	OTU deubiquitinase 1 [Source:HGNC Symbol;Acc:HGNC:27346]	chr10	23439075	23442377	1	p12.2	53.28	protein_coding	3303
2e-07	2.96e-06	46.92	110.01	2.34463	207606_s_at	ARHGAP12	ENSG00000165322	Rho GTPase activating protein 12 [Source:HGNC Symbol;Acc:HGNC:16348]	chr10	31805398	31928876	-1	p11.22	36.94	protein_coding	5944
0.0043261	0.0126	6.73	4.95	0.735513	238803_at	HECTD2	ENSG00000165338	HECT domain E3 ubiquitin protein ligase 2 [Source:HGNC Symbol;Acc:HGNC:26736]	chr10	91409280	91514829	1	q23.32	36.7	protein_coding	11550
0.0091529	0.0235	254.74	153.8	0.603753	227568_at	HECTD2	ENSG00000165338	HECT domain E3 ubiquitin protein ligase 2 [Source:HGNC Symbol;Acc:HGNC:26736]	chr10	91409280	91514829	1	q23.32	36.7	protein_coding	11550
3.9e-06	3.6e-05	9.29	5.32	0.572659	1554331_a_at	LRRC18	ENSG00000165383	leucine rich repeat containing 18 [Source:HGNC Symbol;Acc:HGNC:23199]	chr10	48909483	48914232	-1	q11.23	45.49	protein_coding	1617
9.4e-06	7.52e-05	41.66	12.83	0.307969	226623_at	PHYHIPL	ENSG00000165443	phytanoyl-CoA 2-hydroxylase interacting protein like [Source:HGNC Symbol;Acc:HGNC:29378]	chr10	59176643	59247774	1	q21.1	35.15	protein_coding	4040
2.8e-05	0.000187	304.95	78.04	0.255911	227506_at	SLC16A9	ENSG00000165449	solute carrier family 16 member 9 [Source:HGNC Symbol;Acc:HGNC:23520]	chr10	59650764	59736002	-1	q21.2	40.06	protein_coding	4197
0.0080123	0.021	909.37	1311.29	1.44198	218005_at	ZNF22	ENSG00000165512	zinc finger protein 22 [Source:HGNC Symbol;Acc:HGNC:13012]	chr10	45000923	45005326	1	q11.21	40.76	protein_coding	2103
3e-07	4.21e-06	91.57	184.69	2.01693	223100_s_at	NUDT5	ENSG00000165609	nudix hydrolase 5 [Source:HGNC Symbol;Acc:HGNC:8052]	chr10	12165330	12196144	-1	p14	44.24	protein_coding	4964
0.0025776	0.00822	175.51	102.26	0.582645	214132_at	ATP5F1C	ENSG00000165629	ATP synthase F1 subunit gamma [Source:HGNC Symbol;Acc:HGNC:833]	chr10	7788147	7807815	1	p14	40.09	protein_coding	2308
0.0045296	0.0131	720.96	1042.39	1.44584	208870_x_at	ATP5F1C	ENSG00000165629	ATP synthase F1 subunit gamma [Source:HGNC Symbol;Acc:HGNC:833]	chr10	7788147	7807815	1	p14	40.09	protein_coding	2308
0.0078659	0.0207	778.56	1087.85	1.39726	205711_x_at	ATP5F1C	ENSG00000165629	ATP synthase F1 subunit gamma [Source:HGNC Symbol;Acc:HGNC:833]	chr10	7788147	7807815	1	p14	40.09	protein_coding	2308
7.92e-05	0.000446	20.76	40.82	1.96628	226870_at	COMTD1	ENSG00000165644	catechol-O-methyltransferase domain containing 1 [Source:HGNC Symbol;Acc:HGNC:26309]	chr10	75233641	75236030	-1	q22.2	69.16	protein_coding	1908
0.0036659	0.011	11.68	17.16	1.46918	227225_at	ZNF503	ENSG00000165655	zinc finger protein 503 [Source:HGNC Symbol;Acc:HGNC:23589]	chr10	75397830	75401764	-1	q22.2	61.14	protein_coding	3205
0.0011145	0.00409	54.51	96.67	1.77344	1554510_s_at	GHITM	ENSG00000165678	growth hormone inducible transmembrane protein [Source:HGNC Symbol;Acc:HGNC:17281]	chr10	84139509	84153568	1	q23.1	37.74	protein_coding	2382
0.0033663	0.0103	200.38	326.88	1.6313	209249_s_at	GHITM	ENSG00000165678	growth hormone inducible transmembrane protein [Source:HGNC Symbol;Acc:HGNC:17281]	chr10	84139509	84153568	1	q23.1	37.74	protein_coding	2382
3e-07	4.21e-06	254.43	53.71	0.211099	229378_at	STOX1	ENSG00000165730	storkhead box 1 [Source:HGNC Symbol;Acc:HGNC:23508]	chr10	68827531	68895432	1	q22.1	45.18	protein_coding	3914
3.29e-05	0.000214	33.52	11.63	0.346957	1553202_at	STOX1	ENSG00000165730	storkhead box 1 [Source:HGNC Symbol;Acc:HGNC:23508]	chr10	68827531	68895432	1	q22.1	45.18	protein_coding	3914
0.0035132	0.0106	195.4	306.53	1.56873	208152_s_at	DDX21	ENSG00000165732	DExD-box helicase 21 [Source:HGNC Symbol;Acc:HGNC:2744]	chr10	68956170	68985068	1	q22.1	41.14	protein_coding	4973
0.0068192	0.0185	125.61	211.22	1.68155	224654_at	DDX21	ENSG00000165732	DExD-box helicase 21 [Source:HGNC Symbol;Acc:HGNC:2744]	chr10	68956170	68985068	1	q22.1	41.14	protein_coding	4973
7.17e-05	0.000411	25.07	52.67	2.10092	226339_at	TRUB1	ENSG00000165832	TruB pseudouridine synthase family member 1 [Source:HGNC Symbol;Acc:HGNC:16060]	chr10	114938195	114977676	1	q25.3	36.88	protein_coding	3599
0.0052167	0.0147	12.57	6.4	0.509149	213714_at	CACNB2	ENSG00000165995	calcium voltage-gated channel auxiliary subunit beta 2 [Source:HGNC Symbol;Acc:HGNC:1402]	chr10	18140424	18543557	1	p12.33	40.46	protein_coding	11162
1.25e-05	9.58e-05	7.53	18.16	2.41169	242727_at	ARL5B	ENSG00000165997	ADP ribosylation factor like GTPase 5B [Source:HGNC Symbol;Acc:HGNC:23052]	chr10	18659431	18681639	1	p12.31	37.18	protein_coding	7170
0.0001668	0.000839	310.7	536.23	1.72588	226345_at	ARL5B	ENSG00000165997	ADP ribosylation factor like GTPase 5B [Source:HGNC Symbol;Acc:HGNC:23052]	chr10	18659431	18681639	1	p12.31	37.18	protein_coding	7170
0.0093821	0.0239	28.46	41.49	1.45784	218525_s_at	HIF1AN	ENSG00000166135	hypoxia inducible factor 1 subunit alpha inhibitor [Source:HGNC Symbol;Acc:HGNC:17113]	chr10	100529072	100559998	1	q24.31	45.24	protein_coding	13894
0.0017098	0.00584	952.53	671.95	0.705437	201227_s_at	NDUFB8	ENSG00000166136	NADH:ubiquinone oxidoreductase subunit B8 [Source:HGNC Symbol;Acc:HGNC:7703]	chr10	100523740	100530000	-1	q24.31	47.71	protein_coding	1999
0.0065104	0.0178	57.94	34.22	0.590611	214241_at	NDUFB8	ENSG00000166136	NADH:ubiquinone oxidoreductase subunit B8 [Source:HGNC Symbol;Acc:HGNC:7703]	chr10	100523740	100530000	-1	q24.31	47.71	protein_coding	1999
0.0010172	0.0038	133.84	81.3	0.607442	1553976_a_at	DPCD	ENSG00000166171	deleted in primary ciliary dyskinesia homolog (mouse) [Source:HGNC Symbol;Acc:HGNC:24542]	chr10	101570560	101609662	1	q24.32	50.18	protein_coding	1691
0.00209	0.00691	130.82	83.26	0.636447	226009_at	DPCD	ENSG00000166171	deleted in primary ciliary dyskinesia homolog (mouse) [Source:HGNC Symbol;Acc:HGNC:24542]	chr10	101570560	101609662	1	q24.32	50.18	protein_coding	1691
0.0014899	0.00521	15.38	24.98	1.62419	211949_s_at	NOLC1	ENSG00000166197	nucleolar and coiled-body phosphoprotein 1 [Source:HGNC Symbol;Acc:HGNC:15608]	chr10	102152176	102163871	1	q24.32	47.22	protein_coding	3970
0.0022182	0.00726	10.03	16.34	1.62911	205895_s_at	NOLC1	ENSG00000166197	nucleolar and coiled-body phosphoprotein 1 [Source:HGNC Symbol;Acc:HGNC:15608]	chr10	102152176	102163871	1	q24.32	47.22	protein_coding	3970
3.1e-06	2.99e-05	139.97	377.07	2.69393	212322_at	SGPL1	ENSG00000166224	sphingosine-1-phosphate lyase 1 [Source:HGNC Symbol;Acc:HGNC:10817]	chr10	70815948	70881184	1	q22.1	41.07	protein_coding	7510
0.0023647	0.00766	6.49	11.32	1.74422	208381_s_at	SGPL1	ENSG00000166224	sphingosine-1-phosphate lyase 1 [Source:HGNC Symbol;Acc:HGNC:10817]	chr10	70815948	70881184	1	q22.1	41.07	protein_coding	7510
0.00518	0.0147	260.84	140.59	0.538989	225334_at	BORCS7	ENSG00000166275	BLOC-1 related complex subunit 7 [Source:HGNC Symbol;Acc:HGNC:23516]	chr10	102854259	102864961	1	q24.32	41.63	protein_coding	2672
0.0020439	0.00677	141.63	78.12	0.551578	229145_at	ANAPC16	ENSG00000166295	anaphase promoting complex subunit 16 [Source:HGNC Symbol;Acc:HGNC:26976]	chr10	72216000	72235860	1	q22.1	43.46	protein_coding	4324
< 1e-07	< 1e-07	82.1	6.6	0.0803898	223794_at	ODAD2	ENSG00000169126	outer dynein arm docking complex subunit 2 [Source:HGNC Symbol;Acc:HGNC:25583]	chr10	27775186	27999079	-1	p12.1	38.33	protein_coding	6329
0.0066184	0.018	76.57	136.04	1.77667	222235_s_at	CSGALNACT2	ENSG00000169826	chondroitin sulfate N-acetylgalactosaminyltransferase 2 [Source:HGNC Symbol;Acc:HGNC:24292]	chr10	43138445	43185302	1	q11.21	38.92	protein_coding	3765
< 1e-07	< 1e-07	7.39	51.47	6.96482	210559_s_at	CDK1	ENSG00000170312	cyclin dependent kinase 1 [Source:HGNC Symbol;Acc:HGNC:1722]	chr10	60778331	60794852	1	q21.2	35.07	protein_coding	3931
< 1e-07	< 1e-07	24.51	162.84	6.64382	203213_at	CDK1	ENSG00000170312	cyclin dependent kinase 1 [Source:HGNC Symbol;Acc:HGNC:1722]	chr10	60778331	60794852	1	q21.2	35.07	protein_coding	3931
< 1e-07	< 1e-07	9.09	53.89	5.92849	203214_x_at	CDK1	ENSG00000170312	cyclin dependent kinase 1 [Source:HGNC Symbol;Acc:HGNC:1722]	chr10	60778331	60794852	1	q21.2	35.07	protein_coding	3931
< 1e-07	< 1e-07	4.33	9.9	2.28637	231534_at	CDK1	ENSG00000170312	cyclin dependent kinase 1 [Source:HGNC Symbol;Acc:HGNC:1722]	chr10	60778331	60794852	1	q21.2	35.07	protein_coding	3931
0.0007579	0.00297	11.79	7.44	0.631043	239275_at	FRMPD2	ENSG00000170324	FERM and PDZ domain containing 2 [Source:HGNC Symbol;Acc:HGNC:28572]	chr10	48153088	48274696	-1	q11.22	44.31	protein_coding	8617
0.0056544	0.0158	1133.67	338.91	0.298949	221950_at	EMX2	ENSG00000170370	empty spiracles homeobox 2 [Source:HGNC Symbol;Acc:HGNC:3341]	chr10	117542445	117549546	1	q26.11	56.25	protein_coding	3261
0.0005473	0.00226	4048.5	2532.5	0.62554	202464_s_at	PFKFB3	ENSG00000170525	6-phosphofructo-2-kinase/fructose-2,6-biphosphatase 3 [Source:HGNC Symbol;Acc:HGNC:8874]	chr10	6144934	6254644	1	p15.1	50.91	protein_coding	6114
1.82e-05	0.000131	11.8	5.12	0.433898	1552993_at	DYDC1	ENSG00000170788	DPY30 domain containing 1 [Source:HGNC Symbol;Acc:HGNC:23460]	chr10	80336105	80356755	-1	q23.1	40.36	protein_coding	1237
3.8e-06	3.53e-05	8.93	16.43	1.83987	226313_at	FAM241B	ENSG00000171224	family with sequence similarity 241 member B [Source:HGNC Symbol;Acc:HGNC:23519]	chr10	69630247	69633596	1	q22.1	56.18	protein_coding	1350
0.0027353	0.00864	54.99	90.51	1.64594	223212_at	ZDHHC16	ENSG00000171307	zinc finger DHHC-type palmitoyltransferase 16 [Source:HGNC Symbol;Acc:HGNC:20714]	chr10	97446170	97457370	1	q24.1	49.78	protein_coding	3039
0.0060498	0.0167	117.13	190	1.62213	222609_s_at	EXOSC1	ENSG00000171311	exosome component 1 [Source:HGNC Symbol;Acc:HGNC:17286]	chr10	97435909	97446017	-1	q24.1	46.2	protein_coding	3578
2e-07	2.96e-06	237.73	500.18	2.10398	200886_s_at	PGAM1	ENSG00000171314	phosphoglycerate mutase 1 [Source:HGNC Symbol;Acc:HGNC:8888]	chr10	97426191	97433444	1	q24.1	47.44	protein_coding	2540
5.3e-06	4.62e-05	24.32	12.92	0.53125	230359_at	KNDC1	ENSG00000171798	kinase non-catalytic C-lobe domain containing 1 [Source:HGNC Symbol;Acc:HGNC:29374]	chr10	133160219	133226412	1	q26.3	59.37	protein_coding	23301
< 1e-07	< 1e-07	18.79	8.95	0.476317	220539_at	CFAP46	ENSG00000171811	cilia and flagella associated protein 46 [Source:HGNC Symbol;Acc:HGNC:25247]	chr10	132808392	132942823	-1	q26.3	55.43	protein_coding	10698
0.0011098	0.00407	42.28	23.84	0.56386	233254_x_at	PTEN	ENSG00000171862	phosphatase and tensin homolog [Source:HGNC Symbol;Acc:HGNC:9588]	chr10	87863625	87971930	1	q23.31	35.61	protein_coding	11069
6.29e-05	0.000369	215.41	100.93	0.468548	228793_at	JMJD1C	ENSG00000171988	jumonji domain containing 1C [Source:HGNC Symbol;Acc:HGNC:12313]	chr10	63167221	63521850	-1	q21.3	38.11	protein_coding	11162
0.0001068	0.000578	70.17	34.25	0.4881	241661_at	JMJD1C	ENSG00000171988	jumonji domain containing 1C [Source:HGNC Symbol;Acc:HGNC:12313]	chr10	63167221	63521850	-1	q21.3	38.11	protein_coding	11162
< 1e-07	< 1e-07	472.24	165.68	0.350839	224933_s_at	JMJD1C	ENSG00000171988	jumonji domain containing 1C [Source:HGNC Symbol;Acc:HGNC:12313]	chr10	63167221	63521850	-1	q21.3	38.11	protein_coding	11162
3.2e-06	3.07e-05	213.58	103.64	0.485251	223624_at	ZFAND4	ENSG00000172671	zinc finger AN1-type containing 4 [Source:HGNC Symbol;Acc:HGNC:23504]	chr10	45615500	45672780	-1	q11.22	37.95	protein_coding	6233
0.0018108	0.00613	26.57	67.6	2.54422	209877_at	SNCG	ENSG00000173267	synuclein gamma [Source:HGNC Symbol;Acc:HGNC:11141]	chr10	86958599	86963258	1	q23.2	61.44	protein_coding	1264
0.0070314	0.0189	16.38	36.64	2.23687	219091_s_at	MMRN2	ENSG00000173269	multimerin 2 [Source:HGNC Symbol;Acc:HGNC:19888]	chr10	86935540	86969481	-1	q23.2	55.09	protein_coding	5086
0.0014314	0.00504	773.56	516.01	0.667059	201219_at	CTBP2	ENSG00000175029	C-terminal binding protein 2 [Source:HGNC Symbol;Acc:HGNC:2495]	chr10	124984317	125161170	-1	q26.13	50.11	protein_coding	11056
0.0007925	0.00309	15.38	54.17	3.52211	239265_at	SLC35G1	ENSG00000176273	solute carrier family 35 member G1 [Source:HGNC Symbol;Acc:HGNC:26607]	chr10	93893973	93956062	1	q23.33	40.3	protein_coding	6829
1.4e-06	1.54e-05	80.67	15.65	0.194	1556630_at	CASC2	ENSG00000177640	cancer susceptibility 2 [Source:HGNC Symbol;Acc:HGNC:22933]	chr10	118046279	118210158	1	q26.11	38.26	lncRNA	14972
0.0036645	0.011	12.49	6.12	0.489992	239713_at	CASC2	ENSG00000177640	cancer susceptibility 2 [Source:HGNC Symbol;Acc:HGNC:22933]	chr10	118046279	118210158	1	q26.11	38.26	lncRNA	14972
2.5e-06	2.5e-05	1298.27	682.93	0.526031	244132_x_at	ZNF518A	ENSG00000177853	zinc finger protein 518A [Source:HGNC Symbol;Acc:HGNC:29009]	chr10	96129715	96205288	1	q24.1	38.02	protein_coding	10891
2.34e-05	0.000161	572.57	337.95	0.590234	204291_at	ZNF518A	ENSG00000177853	zinc finger protein 518A [Source:HGNC Symbol;Acc:HGNC:29009]	chr10	96129715	96205288	1	q24.1	38.02	protein_coding	10891
0.0008672	0.00333	12.59	6.89	0.54726	1553844_a_at	C10orf67	ENSG00000179133	chromosome 10 open reading frame 67 [Source:HGNC Symbol;Acc:HGNC:28716]	chr10	23202696	23344845	-1	p12.2	40.21	protein_coding	6473
0.0047628	0.0137	45.23	83.27	1.84103	230129_at	PSTK	ENSG00000179988	phosphoseryl-tRNA kinase [Source:HGNC Symbol;Acc:HGNC:28578]	chr10	122954381	122997513	1	q26.13	40.38	protein_coding	6118
5.3e-06	4.62e-05	9.5	22.83	2.40316	229996_s_at	PCGF5	ENSG00000180628	polycomb group ring finger 5 [Source:HGNC Symbol;Acc:HGNC:28264]	chr10	91163012	91284337	1	q23.32	38.13	protein_coding	8312
2.28e-05	0.000158	17.02	45.3	2.66157	227935_s_at	PCGF5	ENSG00000180628	polycomb group ring finger 5 [Source:HGNC Symbol;Acc:HGNC:28264]	chr10	91163012	91284337	1	q23.32	38.13	protein_coding	8312
0.0019845	0.00661	512.57	777.89	1.51763	217848_s_at	PPA1	ENSG00000180817	inorganic pyrophosphatase 1 [Source:HGNC Symbol;Acc:HGNC:9226]	chr10	70202835	70233911	-1	q22.1	39.8	protein_coding	5166
4.18e-05	0.00026	52.16	106.79	2.04735	227094_at	DHTKD1	ENSG00000181192	dehydrogenase E1 and transketolase domain containing 1 [Source:HGNC Symbol;Acc:HGNC:23537]	chr10	12068954	12123221	1	p14	46.22	protein_coding	5295
0.0010564	0.00391	16.24	37.73	2.32328	209864_at	FRAT2	ENSG00000181274	FRAT regulator of WNT signaling pathway 2 [Source:HGNC Symbol;Acc:HGNC:16048]	chr10	97332497	97334729	-1	q24.1	60.32	protein_coding	2233
0.0010021	0.00375	138.61	286.87	2.06962	212502_at	ADO	ENSG00000181915	2-aminoethanethiol dioxygenase [Source:HGNC Symbol;Acc:HGNC:23506]	chr10	62804720	62808479	1	q21.3	48.48	protein_coding	3760
4.2e-06	3.82e-05	5.38	18.56	3.44981	230469_at	RTKN2	ENSG00000182010	rhotekin 2 [Source:HGNC Symbol;Acc:HGNC:19364]	chr10	62183035	62268844	-1	q21.2	35.19	protein_coding	9793
0.0023287	0.00757	45.21	80.53	1.78124	235626_at	CAMK1D	ENSG00000183049	calcium/calmodulin dependent protein kinase ID [Source:HGNC Symbol;Acc:HGNC:19341]	chr10	12349547	12835545	1	p13	45.61	protein_coding	8697
0.0043244	0.0126	20.36	45.41	2.23035	226959_at	CAMK1D	ENSG00000183049	calcium/calmodulin dependent protein kinase ID [Source:HGNC Symbol;Acc:HGNC:19341]	chr10	12349547	12835545	1	p13	45.61	protein_coding	8697
< 1e-07	< 1e-07	38.78	6.92	0.178442	1553630_at	CABCOCO1	ENSG00000183346	ciliary associated calcium binding coiled-coil 1 [Source:HGNC Symbol;Acc:HGNC:28678]	chr10	61662929	61766766	1	q21.2	35.15	protein_coding	1821
1.1e-06	1.27e-05	43.94	11.39	0.259217	220564_at	RNLS	ENSG00000184719	renalase, FAD dependent amine oxidase [Source:HGNC Symbol;Acc:HGNC:25641]	chr10	88273864	88584530	-1	q23.31	36.76	protein_coding	4790
< 1e-07	< 1e-07	314.11	38.22	0.121677	223824_at	RNLS	ENSG00000184719	renalase, FAD dependent amine oxidase [Source:HGNC Symbol;Acc:HGNC:25641]	chr10	88273864	88584530	-1	q23.31	36.76	protein_coding	4790
0.009372	0.0239	11.14	6.84	0.614004	1568696_at	CDNF	ENSG00000185267	cerebral dopamine neurotrophic factor [Source:HGNC Symbol;Acc:HGNC:24913]	chr10	14819245	14838575	-1	p13	42.99	protein_coding	1703
0.0001109	0.000597	76.5	21.67	0.283268	229233_at	NRG3	ENSG00000185737	neuregulin 3 [Source:HGNC Symbol;Acc:HGNC:7999]	chr10	81875194	82987179	1	q23.1	37.51	protein_coding	5192
0.0001674	0.000842	17.5	59.17	3.38114	203153_at	IFIT1	ENSG00000185745	interferon induced protein with tetratricopeptide repeats 1 [Source:HGNC Symbol;Acc:HGNC:5407]	chr10	89392546	89406487	1	q23.31	38.55	protein_coding	4614
7.91e-05	0.000446	24.42	59.69	2.44431	219800_s_at	THNSL1	ENSG00000185875	threonine synthase like 1 [Source:HGNC Symbol;Acc:HGNC:26160]	chr10	25016612	25026664	1	p12.1	37.78	protein_coding	3834
0.0008685	0.00334	39.03	90.08	2.30797	222931_s_at	THNSL1	ENSG00000185875	threonine synthase like 1 [Source:HGNC Symbol;Acc:HGNC:26160]	chr10	25016612	25026664	1	p12.1	37.78	protein_coding	3834
< 1e-07	< 1e-07	9.21	46.19	5.0152	233562_at	LINC00839	ENSG00000185904	long intergenic non-protein coding RNA 839 [Source:HGNC Symbol;Acc:HGNC:28269]	chr10	42475480	42495337	1	q11.21	43.45	lncRNA	8423
< 1e-07	1.6e-06	29.19	85.15	2.91709	226887_at	HSPA14	ENSG00000187522	heat shock protein family A (Hsp70) member 14 [Source:HGNC Symbol;Acc:HGNC:29526]	chr10	14838306	14871741	1	p13	39.43	protein_coding	2502
1.9e-06	1.99e-05	44.72	132.11	2.95416	219212_at	HSPA14	ENSG00000187522	heat shock protein family A (Hsp70) member 14 [Source:HGNC Symbol;Acc:HGNC:29526]	chr10	14838306	14871741	1	p13	39.43	protein_coding	2502
0.0002242	0.00108	5.68	13.96	2.45775	228523_at	NANOS1	ENSG00000188613	nanos C2HC-type zinc finger 1 [Source:HGNC Symbol;Acc:HGNC:23044]	chr10	119029714	119033730	1	q26.11	50.91	protein_coding	4017
0.003519	0.0106	37.84	62.76	1.65856	203031_s_at	UROS	ENSG00000188690	uroporphyrinogen III synthase [Source:HGNC Symbol;Acc:HGNC:12592]	chr10	125784980	125823258	-1	q26.2	46.11	protein_coding	9505
0.0082643	0.0216	16.03	35.51	2.21522	1568781_at	UROS	ENSG00000188690	uroporphyrinogen III synthase [Source:HGNC Symbol;Acc:HGNC:12592]	chr10	125784980	125823258	-1	q26.2	46.11	protein_coding	9505
0.0011282	0.00413	9.36	6.62	0.707265	244435_at	INSYN2A	ENSG00000188916	inhibitory synaptic factor 2A [Source:HGNC Symbol;Acc:HGNC:33859]	chr10	127135426	127196591	-1	q26.2	44.72	protein_coding	4840
9.01e-05	0.000498	347.92	201.27	0.578495	231864_at	ZNF33A	ENSG00000189180	zinc finger protein 33A [Source:HGNC Symbol;Acc:HGNC:13096]	chr10	38010650	38065088	1	p11.1	39.26	protein_coding	7547
0.0007087	0.00281	432.3	666.58	1.54194	225049_at	BLOC1S2	ENSG00000196072	biogenesis of lysosomal organelles complex 1 subunit 2 [Source:HGNC Symbol;Acc:HGNC:20984]	chr10	100273280	100286680	-1	q24.31	47.31	protein_coding	2911
0.0022083	0.00723	14.84	6.9	0.46496	1562743_at	ZNF33B	ENSG00000196693	zinc finger protein 33B [Source:HGNC Symbol;Acc:HGNC:13097]	chr10	42574185	42638570	-1	q11.21	40.2	protein_coding	8309
1.4e-06	1.54e-05	8.83	27.3	3.09173	206261_at	ZNF239	ENSG00000196793	zinc finger protein 239 [Source:HGNC Symbol;Acc:HGNC:13031]	chr10	43556344	43574618	-1	q11.21	42.81	protein_coding	2509
4.91e-05	0.000298	1261.69	802.84	0.636321	219353_at	NHLRC2	ENSG00000196865	NHL repeat containing 2 [Source:HGNC Symbol;Acc:HGNC:24731]	chr10	113854661	113917194	1	q25.3	35.52	protein_coding	11223
0.0036002	0.0108	77.42	38.08	0.491863	244320_at	NHLRC2	ENSG00000196865	NHL repeat containing 2 [Source:HGNC Symbol;Acc:HGNC:24731]	chr10	113854661	113917194	1	q25.3	35.52	protein_coding	11223
0.0024482	0.00788	15.6	27.16	1.74103	226348_at	FUT11	ENSG00000196968	fucosyltransferase 11 [Source:HGNC Symbol;Acc:HGNC:19233]	chr10	73772276	73780251	1	q22.2	47.53	protein_coding	4925
1e-07	1.6e-06	969.94	269.19	0.277533	218322_s_at	ACSL5	ENSG00000197142	acyl-CoA synthetase long chain family member 5 [Source:HGNC Symbol;Acc:HGNC:16526]	chr10	112374116	112428379	1	q25.2	42.88	protein_coding	4137
0.0052745	0.0149	165.77	82.92	0.500211	222592_s_at	ACSL5	ENSG00000197142	acyl-CoA synthetase long chain family member 5 [Source:HGNC Symbol;Acc:HGNC:16526]	chr10	112374116	112428379	1	q25.2	42.88	protein_coding	4137
0.0007694	0.00301	13.56	24.24	1.78761	219277_s_at	OGDHL	ENSG00000197444	oxoglutarate dehydrogenase L [Source:HGNC Symbol;Acc:HGNC:25590]	chr10	49734641	49762379	-1	q11.23	55.46	protein_coding	5726
1.6e-05	0.000118	10.3	29.17	2.83204	211343_s_at	COL13A1	ENSG00000197467	collagen type XIII alpha 1 chain [Source:HGNC Symbol;Acc:HGNC:2190]	chr10	69801880	69964275	1	q22.1	51.91	protein_coding	11509
3.6e-06	3.38e-05	192.13	444.18	2.31187	200866_s_at	PSAP	ENSG00000197746	prosaposin [Source:HGNC Symbol;Acc:HGNC:9498]	chr10	71816298	71851325	-1	q22.1	47.68	protein_coding	3189
4.57e-05	0.000281	1702.3	2547.58	1.49655	200871_s_at	PSAP	ENSG00000197746	prosaposin [Source:HGNC Symbol;Acc:HGNC:9498]	chr10	71816298	71851325	-1	q22.1	47.68	protein_coding	3189
7.5e-06	6.19e-05	23.24	7.16	0.30809	220919_s_at	CFAP43	ENSG00000197748	cilia and flagella associated protein 43 [Source:HGNC Symbol;Acc:HGNC:26684]	chr10	104129888	104232364	-1	q25.1	39.29	protein_coding	7186
< 1e-07	< 1e-07	72.17	8.13	0.112651	243896_at	CFAP43	ENSG00000197748	cilia and flagella associated protein 43 [Source:HGNC Symbol;Acc:HGNC:26684]	chr10	104129888	104232364	-1	q25.1	39.29	protein_coding	7186
< 1e-07	< 1e-07	2746.07	38.82	0.0141366	231084_at	CFAP43	ENSG00000197748	cilia and flagella associated protein 43 [Source:HGNC Symbol;Acc:HGNC:26684]	chr10	104129888	104232364	-1	q25.1	39.29	protein_coding	7186
0.0001802	0.000894	43.41	91.96	2.11841	222464_s_at	MCMBP	ENSG00000197771	minichromosome maintenance complex binding protein [Source:HGNC Symbol;Acc:HGNC:25782]	chr10	119829404	119892556	-1	q26.11	41.74	protein_coding	5994
1e-07	1.6e-06	19.34	7.17	0.370734	238158_at	MEIG1	ENSG00000197889	meiosis/spermiogenesis associated 1 [Source:HGNC Symbol;Acc:HGNC:23429]	chr10	14959388	14988050	1	p13	43.25	protein_coding	1464
2e-07	2.96e-06	27.07	70.01	2.58626	218582_at	MARCHF5	ENSG00000198060	membrane associated ring-CH-type finger 5 [Source:HGNC Symbol;Acc:HGNC:26025]	chr10	92291167	92353964	1	q23.32	40.45	protein_coding	4628
0.0011838	0.00429	11.28	18.46	1.63652	219344_at	SLC29A3	ENSG00000198246	solute carrier family 29 member 3 [Source:HGNC Symbol;Acc:HGNC:23096]	chr10	71319259	71381423	1	q22.1	50.65	protein_coding	5438
1.5e-06	1.63e-05	110.82	62.35	0.562624	223494_at	OGA	ENSG00000198408	O-GlcNAcase [Source:HGNC Symbol;Acc:HGNC:7056]	chr10	101784443	101818465	-1	q24.32	41.92	protein_coding	7247
0.0038147	0.0114	92.24	154.1	1.67064	203607_at	INPP5F	ENSG00000198825	inositol polyphosphate-5-phosphatase F [Source:HGNC Symbol;Acc:HGNC:17054]	chr10	119726042	119829147	1	q26.11	41.23	protein_coding	7479
0.0096339	0.0245	14.16	30.49	2.15325	230563_at	RASGEF1A	ENSG00000198915	RasGEF domain family member 1A [Source:HGNC Symbol;Acc:HGNC:24246]	chr10	43194535	43267065	-1	q11.21	56.42	protein_coding	6219
< 1e-07	< 1e-07	645.51	58.28	0.0902852	232968_at	FANK1	ENSG00000203780	fibronectin type III and ankyrin repeat domains 1 [Source:HGNC Symbol;Acc:HGNC:23527]	chr10	125896564	126009592	1	q26.2	41.48	protein_coding	3359
0.004418	0.0129	257.42	395.94	1.53811	226631_at	EEF1AKMT2	ENSG00000203791	EEF1A lysine methyltransferase 2 [Source:HGNC Symbol;Acc:HGNC:33787]	chr10	124748149	124791887	-1	q26.13	40.88	protein_coding	5819
< 1e-07	< 1e-07	6.47	23.47	3.62751	236044_at	PLPP4	ENSG00000203805	phospholipid phosphatase 4 [Source:HGNC Symbol;Acc:HGNC:23531]	chr10	120457227	120592065	1	q26.12	42.25	protein_coding	3722
< 1e-07	< 1e-07	397.69	28.89	0.0726445	238763_at	RBM20	ENSG00000203867	RNA binding motif protein 20 [Source:HGNC Symbol;Acc:HGNC:27424]	chr10	110644336	110839468	1	q25.2	43.94	protein_coding	8222
0.0008081	0.00314	12.86	5.92	0.460342	222072_at	ADD3-AS1	ENSG00000203876	ADD3 antisense RNA 1 [Source:HGNC Symbol;Acc:HGNC:48682]	chr10	109940104	110008381	-1	q25.1	41.95	lncRNA	9085
1.9e-06	1.99e-05	198.06	104.42	0.527214	241996_at	RUFY2	ENSG00000204130	RUN and FYVE domain containing 2 [Source:HGNC Symbol;Acc:HGNC:19761]	chr10	68341107	68407294	-1	q21.3	40.87	protein_coding	8137
0.00855	0.0222	10.56	6.11	0.578598	1554133_at	RUFY2	ENSG00000204130	RUN and FYVE domain containing 2 [Source:HGNC Symbol;Acc:HGNC:19761]	chr10	68341107	68407294	-1	q21.3	40.87	protein_coding	8137
0.0073316	0.0196	10.25	16.57	1.61659	206747_at	GPRIN2	ENSG00000204175	G protein regulated inducer of neurite outgrowth 2 [Source:HGNC Symbol;Acc:HGNC:23730]	chr10	46549044	46555530	-1	q11.22	57.21	protein_coding	1968
3.76e-05	0.000239	60.7	22.47	0.370181	239151_at	BMS1P1	ENSG00000204177	BMS1 pseudogene 1 [Source:HGNC Symbol;Acc:HGNC:23649]	chr10	46786674	46811989	1	q11.22	41.22	transcribed_unprocessed_pseudogene	4561
0.0013306	0.00473	11.52	5	0.434028	1559756_at	LINC02656	ENSG00000212743	long intergenic non-protein coding RNA 2656 [Source:HGNC Symbol;Acc:HGNC:54142]	chr10	6350316	6352762	1	p15.1	41.36	lncRNA	2447
0.0011722	0.00426	17.25	36.18	2.09739	231146_at	FAM24B	ENSG00000213185	family with sequence similarity 24 member B [Source:HGNC Symbol;Acc:HGNC:23475]	chr10	122849078	122879641	-1	q26.13	41.03	protein_coding	1177
< 1e-07	< 1e-07	57.33	179.24	3.12646	213088_s_at	DNAJC9	ENSG00000213551	DnaJ heat shock protein family (Hsp40) member C9 [Source:HGNC Symbol;Acc:HGNC:19123]	chr10	73183362	73247255	-1	q22.2	39.91	protein_coding	3218
0.0003405	0.00153	31.68	11.27	0.355745	232885_at	BBIP1	ENSG00000214413	BBSome interacting protein 1 [Source:HGNC Symbol;Acc:HGNC:28093]	chr10	110898730	110919201	-1	q25.2	38.61	protein_coding	8442
0.000233	0.00111	18.66	11.22	0.601286	236043_at	BBIP1	ENSG00000214413	BBSome interacting protein 1 [Source:HGNC Symbol;Acc:HGNC:28093]	chr10	110898730	110919201	-1	q25.2	38.61	protein_coding	8442
0.0010079	0.00377	11.56	26.11	2.25865	1558794_at	NUTM2A-AS1	ENSG00000223482	NUTM2A antisense RNA 1 [Source:HGNC Symbol;Acc:HGNC:45161]	chr10	87201647	87342612	-1	q23.2	41.08	lncRNA	22452
5.5e-06	4.76e-05	157.23	49.2	0.312917	230737_s_at	SVIL-AS1	ENSG00000224597	SVIL antisense RNA 1 [Source:HGNC Symbol;Acc:HGNC:51219]	chr10	29409402	29487745	1	p11.23	42.95	transcribed_unprocessed_pseudogene	4995
0.0011572	0.00421	7.78	13.35	1.71594	228786_at	SVIL-AS1	ENSG00000224597	SVIL antisense RNA 1 [Source:HGNC Symbol;Acc:HGNC:51219]	chr10	29409402	29487745	1	p11.23	42.95	transcribed_unprocessed_pseudogene	4995
0.0033265	0.0102	80.38	38.87	0.483578	235730_at	NUTM2B-AS1	ENSG00000225484	NUTM2B antisense RNA 1 [Source:HGNC Symbol;Acc:HGNC:51204]	chr10	79661394	79826594	-1	q22.3	39.62	lncRNA	22490
0.0009167	0.00348	5.53	12.32	2.22785	232684_at	ZNF503-AS1	ENSG00000226051	ZNF503 antisense RNA 1 [Source:HGNC Symbol;Acc:HGNC:27370]	chr10	75243568	75373500	1	q22.2	45.28	lncRNA	5276
0.0012353	0.00445	63.87	112.87	1.76718	205060_at	PARG	ENSG00000227345	poly(ADP-ribose) glycohydrolase [Source:HGNC Symbol;Acc:HGNC:8605]	chr10	49818279	49970203	-1	q11.23	38.39	protein_coding	5158
< 1e-07	< 1e-07	31.76	8.31	0.26165	1557827_at	DNAJC9-AS1	ENSG00000227540	DNAJC9 antisense RNA 1 [Source:NCBI gene (formerly Entrezgene);Acc:414245]	chr10	73252791	73254349	1	q22.2	42.27	lncRNA	940
< 1e-07	< 1e-07	760.82	164.19	0.215807	229388_at	DNAJC9-AS1	ENSG00000227540	DNAJC9 antisense RNA 1 [Source:NCBI gene (formerly Entrezgene);Acc:414245]	chr10	73252791	73254349	1	q22.2	42.27	lncRNA	940
< 1e-07	< 1e-07	28.69	5.37	0.187173	231051_at	MRLN	ENSG00000227877	myoregulin [Source:HGNC Symbol;Acc:HGNC:48649]	chr10	59736692	59756041	-1	q21.2	41.5	protein_coding	2951
< 1e-07	1.6e-06	627.58	111.52	0.177698	232531_at	EMX2OS	ENSG00000229847	EMX2 opposite strand/antisense RNA [Source:HGNC Symbol;Acc:HGNC:18511]	chr10	117473215	117545068	-1	q26.11	47.72	lncRNA	8918
0.0028518	0.00894	44.03	24.39	0.55394	230963_at	EMX2OS	ENSG00000229847	EMX2 opposite strand/antisense RNA [Source:HGNC Symbol;Acc:HGNC:18511]	chr10	117473215	117545068	-1	q26.11	47.72	lncRNA	8918
0.0001901	0.000936	7.86	18.56	2.36132	239136_at	UNC5B-AS1	ENSG00000237512	UNC5B antisense RNA 1 [Source:HGNC Symbol;Acc:HGNC:45096]	chr10	71217224	71218228	-1	q22.1	61.29	lncRNA	707
9.43e-05	0.000518	8.65	18.96	2.19191	1569322_at	LINC00857	ENSG00000237523	long intergenic non-protein coding RNA 857 [Source:HGNC Symbol;Acc:HGNC:45114]	chr10	80207372	80219657	1	q22.3	44.05	lncRNA	2509
0.0063148	0.0173	16.25	8.32	0.512	240745_at	LINC02944	ENSG00000238276	novel transcript	chr10	118241468	118267710	1	q26.11	42.04	lncRNA	4834
0.0002784	0.00129	150.87	90.14	0.597468	223766_at	PARGP1	ENSG00000239883	poly(ADP-ribose) glycohydrolase pseudogene 1 [Source:HGNC Symbol;Acc:HGNC:45008]	chr10	45854093	45972154	-1	q11.22	38.95	transcribed_unprocessed_pseudogene	3214
0.0074136	0.0198	43.35	19.47	0.449135	239093_at	HOGA1	ENSG00000241935	4-hydroxy-2-oxoglutarate aldolase 1 [Source:HGNC Symbol;Acc:HGNC:25155]	chr10	97584323	97612802	1	q24.2	48.67	protein_coding	4148
0.0081425	0.0213	20.87	13.44	0.643987	1557382_x_at	AGAP11	ENSG00000261011	ArfGAP with GTPase domain, ankyrin repeat and PH domain 11 [Source:HGNC Symbol;Acc:HGNC:29421]	chr10	87001636	87009905	1	q23.2	42.04	transcribed_unprocessed_pseudogene	1740
8.72e-05	0.000483	56.71	145.01	2.55704	218119_at	TIMM23	ENSG00000265354	translocase of inner mitochondrial membrane 23 [Source:HGNC Symbol;Acc:HGNC:17312]	chr10	45972489	46003742	1	q11.22	40.13	protein_coding	1190
1.84e-05	0.000132	68.28	21.69	0.317663	231196_x_at	FAM238C	ENSG00000283709	family with sequence similarity 238 member C [Source:HGNC Symbol;Acc:HGNC:24672]	chr10	26931206	26944418	-1	p12.1	45.92	transcribed_unprocessed_pseudogene	5545
0.0001776	0.000884	10.43	31.02	2.97411	1562527_at		ENSG00000291065	novel transcript	chr10	42254072	42367993	-1			lncRNA
1.8e-06	1.9e-05	10.9	23.44	2.15046	218834_s_at	TMEM132A	ENSG00000006118	transmembrane protein 132A [Source:HGNC Symbol;Acc:HGNC:31092]	chr11	60924460	60937159	1	q12.2	58.71	protein_coding	7274
1e-07	1.6e-06	189.71	51.37	0.270782	205640_at	ALDH3B1	ENSG00000006534	aldehyde dehydrogenase 3 family member B1 [Source:HGNC Symbol;Acc:HGNC:410]	chr11	68008578	68029282	1	q13.2	58.4	protein_coding	6626
0.000593	0.00242	43.33	26.16	0.603739	211004_s_at	ALDH3B1	ENSG00000006534	aldehyde dehydrogenase 3 family member B1 [Source:HGNC Symbol;Acc:HGNC:410]	chr11	68008578	68029282	1	q13.2	58.4	protein_coding	6626
0.0017751	0.00603	7.57	21.91	2.89432	235795_at	PAX6	ENSG00000007372	paired box 6 [Source:HGNC Symbol;Acc:HGNC:8620]	chr11	31784779	31817961	-1	p13	49.68	protein_coding	20639
< 1e-07	< 1e-07	307.17	110.35	0.359247	241905_at	PIK3C2A	ENSG00000011405	phosphatidylinositol-4-phosphate 3-kinase catalytic subunit type 2 alpha [Source:HGNC Symbol;Acc:HGNC:8971]	chr11	17077730	17207983	-1	p15.1	39.84	protein_coding	9204
< 1e-07	1.6e-06	11.28	27.21	2.41223	204441_s_at	POLA2	ENSG00000014138	DNA polymerase alpha 2, accessory subunit [Source:HGNC Symbol;Acc:HGNC:30073]	chr11	65261920	65305589	1	q13.1	47.81	protein_coding	5568
3e-07	4.21e-06	10.24	28.44	2.77734	236546_at	POLA2	ENSG00000014138	DNA polymerase alpha 2, accessory subunit [Source:HGNC Symbol;Acc:HGNC:30073]	chr11	65261920	65305589	1	q13.1	47.81	protein_coding	5568
8.7e-06	7.02e-05	28.51	11.26	0.394949	229369_at	VSIG2	ENSG00000019102	V-set and immunoglobulin domain containing 2 [Source:HGNC Symbol;Acc:HGNC:17149]	chr11	124747474	124752255	-1	q24.2	53.76	protein_coding	1447
2.96e-05	0.000196	27.67	14.72	0.531984	228232_s_at	VSIG2	ENSG00000019102	V-set and immunoglobulin domain containing 2 [Source:HGNC Symbol;Acc:HGNC:17149]	chr11	124747474	124752255	-1	q24.2	53.76	protein_coding	1447
1e-07	1.6e-06	6.1	29.48	4.83279	226086_at	SYT13	ENSG00000019505	synaptotagmin 13 [Source:HGNC Symbol;Acc:HGNC:14962]	chr11	45240302	45286341	-1	p11.2	46.29	protein_coding	5445
0.0006099	0.00248	5.1	9.67	1.89608	221859_at	SYT13	ENSG00000019505	synaptotagmin 13 [Source:HGNC Symbol;Acc:HGNC:14962]	chr11	45240302	45286341	-1	p11.2	46.29	protein_coding	5445
1.3e-06	1.45e-05	16.03	47.77	2.98004	205395_s_at	MRE11	ENSG00000020922	MRE11 homolog, double strand break repair nuclease [Source:HGNC Symbol;Acc:HGNC:7230]	chr11	94415570	94493885	-1	q21	37.3	protein_coding	7674
0.0002419	0.00115	82.82	39.8	0.48056	223464_at	OSBPL5	ENSG00000021762	oxysterol binding protein like 5 [Source:HGNC Symbol;Acc:HGNC:16392]	chr11	3087107	3166739	-1	p15.4	57	protein_coding	7473
4e-07	5.38e-06	48.2	12.9	0.267635	217523_at	CD44	ENSG00000026508	CD44 molecule (Indian blood group) [Source:HGNC Symbol;Acc:HGNC:1681]	chr11	35138882	35232402	1	p13	41.56	protein_coding	9992
2e-06	2.07e-05	1010.46	343.6	0.340043	204489_s_at	CD44	ENSG00000026508	CD44 molecule (Indian blood group) [Source:HGNC Symbol;Acc:HGNC:1681]	chr11	35138882	35232402	1	p13	41.56	protein_coding	9992
1.04e-05	8.21e-05	681.61	191.41	0.28082	212063_at	CD44	ENSG00000026508	CD44 molecule (Indian blood group) [Source:HGNC Symbol;Acc:HGNC:1681]	chr11	35138882	35232402	1	p13	41.56	protein_coding	9992
2.37e-05	0.000163	11.5	7.31	0.635652	1565868_at	CD44	ENSG00000026508	CD44 molecule (Indian blood group) [Source:HGNC Symbol;Acc:HGNC:1681]	chr11	35138882	35232402	1	p13	41.56	protein_coding	9992
0.0052518	0.0148	47.39	24.46	0.516143	212014_x_at	CD44	ENSG00000026508	CD44 molecule (Indian blood group) [Source:HGNC Symbol;Acc:HGNC:1681]	chr11	35138882	35232402	1	p13	41.56	protein_coding	9992
3.2e-06	3.07e-05	62.51	17.62	0.281875	229337_at	USP2	ENSG00000036672	ubiquitin specific peptidase 2 [Source:HGNC Symbol;Acc:HGNC:12618]	chr11	119355215	119381711	-1	q23.3	54.63	protein_coding	4523
0.0026756	0.00848	35.47	73.44	2.07048	229885_at	RSF1	ENSG00000048649	remodeling and spacing factor 1 [Source:HGNC Symbol;Acc:HGNC:18118]	chr11	77660009	77820869	-1	q14.1	39.02	protein_coding	15579
0.0028837	0.00902	36.39	64.7	1.77796	218166_s_at	RSF1	ENSG00000048649	remodeling and spacing factor 1 [Source:HGNC Symbol;Acc:HGNC:18118]	chr11	77660009	77820869	-1	q14.1	39.02	protein_coding	15579
4.41e-05	0.000272	116.83	61.79	0.528888	223637_s_at	FAM160A2	ENSG00000051009	family with sequence similarity 160 member A2 [Source:HGNC Symbol;Acc:HGNC:25378]	chr11	6211345	6234711	-1	p15.4	44.55	protein_coding	4726
0.0003455	0.00155	348.74	201.4	0.577508	224849_at	TTC17	ENSG00000052841	tetratricopeptide repeat domain 17 [Source:HGNC Symbol;Acc:HGNC:25596]	chr11	43358920	43494933	1	p12	37.9	protein_coding	11296
0.0005027	0.00211	28.91	12.71	0.43964	204487_s_at	KCNQ1	ENSG00000053918	potassium voltage-gated channel subfamily Q member 1 [Source:HGNC Symbol;Acc:HGNC:6294]	chr11	2444684	2849105	1	p15.5	51.55	protein_coding	4420
1.13e-05	8.79e-05	25.55	64.68	2.53151	244563_at	QSER1	ENSG00000060749	glutamine and serine rich 1 [Source:HGNC Symbol;Acc:HGNC:26154]	chr11	32892811	32993316	1	p13	38.69	protein_coding	10908
0.0009324	0.00353	206.8	353.78	1.71074	226265_at	QSER1	ENSG00000060749	glutamine and serine rich 1 [Source:HGNC Symbol;Acc:HGNC:26154]	chr11	32892811	32993316	1	p13	38.69	protein_coding	10908
2.95e-05	0.000195	6.54	10.14	1.55046	226064_s_at	DGAT2	ENSG00000062282	diacylglycerol O-acyltransferase 2 [Source:HGNC Symbol;Acc:HGNC:16940]	chr11	75759512	75801535	1	q13.5	52.02	protein_coding	7904
< 1e-07	< 1e-07	7.86	20.35	2.58906	224327_s_at	DGAT2	ENSG00000062282	diacylglycerol O-acyltransferase 2 [Source:HGNC Symbol;Acc:HGNC:16940]	chr11	75759512	75801535	1	q13.5	52.02	protein_coding	7904
< 1e-07	< 1e-07	239.1	32	0.133835	205406_s_at	SPA17	ENSG00000064199	sperm autoantigenic protein 17 [Source:HGNC Symbol;Acc:HGNC:11210]	chr11	124673844	124697518	1	q24.2	37.93	protein_coding	5159
3.68e-05	0.000235	847.64	198.67	0.23438	205413_at	MPPED2	ENSG00000066382	metallophosphoesterase domain containing 2 [Source:HGNC Symbol;Acc:HGNC:1180]	chr11	30384493	30586872	-1	p14.1	40.01	protein_coding	8114
0.000146	0.00075	173.66	36.64	0.210987	215692_s_at	MPPED2	ENSG00000066382	metallophosphoesterase domain containing 2 [Source:HGNC Symbol;Acc:HGNC:1180]	chr11	30384493	30586872	-1	p14.1	40.01	protein_coding	8114
6e-07	7.62e-06	1312.69	368.95	0.281064	203675_at	NUCB2	ENSG00000070081	nucleobindin 2 [Source:HGNC Symbol;Acc:HGNC:8044]	chr11	17208153	17349980	1	p15.1	41.44	protein_coding	9025
0.0008732	0.00335	70.24	28.45	0.40504	229838_at	NUCB2	ENSG00000070081	nucleobindin 2 [Source:HGNC Symbol;Acc:HGNC:8044]	chr11	17208153	17349980	1	p15.1	41.44	protein_coding	9025
7e-07	8.64e-06	327.86	648.14	1.97688	209143_s_at	CLNS1A	ENSG00000074201	chloride nucleotide-sensitive channel 1A [Source:HGNC Symbol;Acc:HGNC:2080]	chr11	77514936	77637794	-1	q14.1	41.76	protein_coding	4581
0.0071565	0.0192	187.49	290.55	1.54968	209572_s_at	EED	ENSG00000074266	embryonic ectoderm development [Source:HGNC Symbol;Acc:HGNC:3188]	chr11	86244753	86278813	1	q14.2	37.04	protein_coding	6807
9.7e-06	7.72e-05	10.46	23.09	2.20746	223989_s_at	REXO2	ENSG00000076043	RNA exonuclease 2 [Source:HGNC Symbol;Acc:HGNC:17851]	chr11	114439435	114450279	1	q23.2	39.48	protein_coding	3650
0.0050564	0.0144	88.79	168.87	1.9019	218379_at	RBM7	ENSG00000076053	RNA binding motif protein 7 [Source:HGNC Symbol;Acc:HGNC:9904]	chr11	114400030	114414203	1	q23.2	38.27	protein_coding	7885
4.1e-06	3.76e-05	375.9	995.16	2.64741	211042_x_at	MCAM	ENSG00000076706	melanoma cell adhesion molecule [Source:HGNC Symbol;Acc:HGNC:6934]	chr11	119308529	119321521	-1	q23.3	59.59	protein_coding	7422
1.12e-05	8.73e-05	13.31	49.75	3.73779	222689_at	ACER3	ENSG00000078124	alkaline ceramidase 3 [Source:HGNC Symbol;Acc:HGNC:16066]	chr11	76860859	77026797	1	q13.5	38.74	protein_coding	23102
0.0004761	0.00202	10.43	28.47	2.72963	231321_s_at	ACER3	ENSG00000078124	alkaline ceramidase 3 [Source:HGNC Symbol;Acc:HGNC:16066]	chr11	76860859	77026797	1	q13.5	38.74	protein_coding	23102
0.0011614	0.00422	208.42	386.21	1.85304	227776_at	ACER3	ENSG00000078124	alkaline ceramidase 3 [Source:HGNC Symbol;Acc:HGNC:16066]	chr11	76860859	77026797	1	q13.5	38.74	protein_coding	23102
0.0005639	0.00232	13.79	8.03	0.582306	215255_at	IGSF9B	ENSG00000080854	immunoglobulin superfamily member 9B [Source:HGNC Symbol;Acc:HGNC:32326]	chr11	133896438	133956968	-1	q25	55.74	protein_coding	17862
4.1e-06	3.76e-05	34.42	6.68	0.194073	208305_at	PGR	ENSG00000082175	progesterone receptor [Source:HGNC Symbol;Acc:HGNC:8910]	chr11	101029624	101129813	-1	q22.1	37.72	protein_coding	14693
< 1e-07	< 1e-07	1045.88	19.65	0.018788	228554_at	PGR	ENSG00000082175	progesterone receptor [Source:HGNC Symbol;Acc:HGNC:8910]	chr11	101029624	101129813	-1	q22.1	37.72	protein_coding	14693
3e-07	4.21e-06	59.56	132.21	2.21978	208702_x_at	APLP2	ENSG00000084234	amyloid beta precursor like protein 2 [Source:HGNC Symbol;Acc:HGNC:598]	chr11	130068147	130144811	1	q24.3	43.97	protein_coding	7463
1.5e-06	1.63e-05	24.51	56.86	2.31987	214875_x_at	APLP2	ENSG00000084234	amyloid beta precursor like protein 2 [Source:HGNC Symbol;Acc:HGNC:598]	chr11	130068147	130144811	1	q24.3	43.97	protein_coding	7463
1.8e-06	1.9e-05	23.53	57.55	2.44581	211404_s_at	APLP2	ENSG00000084234	amyloid beta precursor like protein 2 [Source:HGNC Symbol;Acc:HGNC:598]	chr11	130068147	130144811	1	q24.3	43.97	protein_coding	7463
0.0008703	0.00334	12.67	40.09	3.16417	214073_at	CTTN	ENSG00000085733	cortactin [Source:HGNC Symbol;Acc:HGNC:3338]	chr11	70398404	70436584	1	q13.3	52.81	protein_coding	6949
0.0007412	0.00292	8.33	4.88	0.585834	217483_at	FOLH1	ENSG00000086205	folate hydrolase 1 [Source:HGNC Symbol;Acc:HGNC:3788]	chr11	49145092	49208638	-1	p11.12	35.66	protein_coding	5335
0.0007935	0.00309	62.44	19.35	0.309898	205860_x_at	FOLH1	ENSG00000086205	folate hydrolase 1 [Source:HGNC Symbol;Acc:HGNC:3788]	chr11	49145092	49208638	-1	p11.12	35.66	protein_coding	5335
0.000401	0.00175	60.35	18.61	0.308368	215363_x_at	FOLH1	ENSG00000086205	folate hydrolase 1 [Source:HGNC Symbol;Acc:HGNC:3788]	chr11	49145092	49208638	-1	p11.12	35.66	protein_coding	5335
0.0005458	0.00225	29.24	14.18	0.484952	217487_x_at	FOLH1	ENSG00000086205	folate hydrolase 1 [Source:HGNC Symbol;Acc:HGNC:3788]	chr11	49145092	49208638	-1	p11.12	35.66	protein_coding	5335
0.0001266	0.000666	28.34	57.44	2.02682	204812_at	ZW10	ENSG00000086827	zw10 kinetochore protein [Source:HGNC Symbol;Acc:HGNC:13194]	chr11	113733187	113773735	-1	q23.2	39.08	protein_coding	2916
< 1e-07	< 1e-07	5.26	39.9	7.58555	219773_at	NOX4	ENSG00000086991	NADPH oxidase 4 [Source:HGNC Symbol;Acc:HGNC:7891]	chr11	89324353	89498187	-1	q14.3	35.47	protein_coding	6099
0.0005687	0.00233	26.16	46.78	1.78823	214649_s_at	MTMR2	ENSG00000087053	myotubularin related protein 2 [Source:HGNC Symbol;Acc:HGNC:7450]	chr11	95821766	95925315	-1	q21	36.51	protein_coding	13952
1.1e-06	1.27e-05	101.58	184.54	1.8167	211934_x_at	GANAB	ENSG00000089597	glucosidase II alpha subunit [Source:HGNC Symbol;Acc:HGNC:4138]	chr11	62624826	62646726	-1	q12.3	50.02	protein_coding	5030
0.0003116	0.00142	82.74	46.5	0.562001	204927_at	RASSF7	ENSG00000099849	Ras association domain family member 7 [Source:HGNC Symbol;Acc:HGNC:1166]	chr11	560404	564025	1	p15.5	69.11	protein_coding	2514
0.0004375	0.00188	43.86	26.48	0.603739	40359_at	RASSF7	ENSG00000099849	Ras association domain family member 7 [Source:HGNC Symbol;Acc:HGNC:1166]	chr11	560404	564025	1	p15.5	69.11	protein_coding	2514
0.0002835	0.00131	20.62	46.01	2.23133	229102_at	HTATIP2	ENSG00000109854	HIV-1 Tat interactive protein 2 [Source:HGNC Symbol;Acc:HGNC:16637]	chr11	20363685	20383782	1	p15.1	42.5	protein_coding	2796
0.0003831	0.00169	146.87	310.59	2.11473	209448_at	HTATIP2	ENSG00000109854	HIV-1 Tat interactive protein 2 [Source:HGNC Symbol;Acc:HGNC:16637]	chr11	20363685	20383782	1	p15.1	42.5	protein_coding	2796
0.0004213	0.00182	31.72	77.39	2.43979	207180_s_at	HTATIP2	ENSG00000109854	HIV-1 Tat interactive protein 2 [Source:HGNC Symbol;Acc:HGNC:16637]	chr11	20363685	20383782	1	p15.1	42.5	protein_coding	2796
4.93e-05	0.000299	57.5	119.12	2.07165	201487_at	CTSC	ENSG00000109861	cathepsin C [Source:HGNC Symbol;Acc:HGNC:2528]	chr11	88265069	88359684	-1	q14.2	37.69	protein_coding	24849
0.0002882	0.00133	16.54	41.52	2.51028	225647_s_at	CTSC	ENSG00000109861	cathepsin C [Source:HGNC Symbol;Acc:HGNC:2528]	chr11	88265069	88359684	-1	q14.2	37.69	protein_coding	24849
0.0065358	0.0178	10.36	5.48	0.528958	205883_at	ZBTB16	ENSG00000109906	zinc finger and BTB domain containing 16 [Source:HGNC Symbol;Acc:HGNC:12930]	chr11	114059041	114256765	1	q23.2	47.53	protein_coding	16557
0.0005301	0.0022	59.95	113.47	1.89274	200054_at	ZPR1	ENSG00000109917	ZPR1 zinc finger [Source:HGNC Symbol;Acc:HGNC:13051]	chr11	116773799	116788039	-1	q23.3	44.5	protein_coding	7058
3.7e-06	3.46e-05	18.27	45.91	2.51286	217185_s_at	ZPR1	ENSG00000109917	ZPR1 zinc finger [Source:HGNC Symbol;Acc:HGNC:13051]	chr11	116773799	116788039	-1	q23.3	44.5	protein_coding	7058
< 1e-07	1.6e-06	134.56	289.51	2.15153	217772_s_at	MTCH2	ENSG00000109919	mitochondrial carrier 2 [Source:HGNC Symbol;Acc:HGNC:17587]	chr11	47617315	47642607	-1	p11.2	43.44	protein_coding	2881
0.0073899	0.0197	586.85	804.08	1.37016	222403_at	MTCH2	ENSG00000109919	mitochondrial carrier 2 [Source:HGNC Symbol;Acc:HGNC:17587]	chr11	47617315	47642607	-1	p11.2	43.44	protein_coding	2881
0.0009264	0.00352	153.18	227.88	1.48766	211423_s_at	SC5D	ENSG00000109929	sterol-C5-desaturase [Source:HGNC Symbol;Acc:HGNC:10547]	chr11	121292681	121313410	1	q23.3	38.3	protein_coding	10054
0.0002811	0.0013	16.89	7.1	0.420367	1555787_at	JHY	ENSG00000109944	junctional cadherin complex regulator [Source:HGNC Symbol;Acc:HGNC:26288]	chr11	122882683	122963862	1	q24.1	40.42	protein_coding	8589
< 1e-07	< 1e-07	48.46	9.11	0.18799	220141_at	JHY	ENSG00000109944	junctional cadherin complex regulator [Source:HGNC Symbol;Acc:HGNC:26288]	chr11	122882683	122963862	1	q24.1	40.42	protein_coding	8589
0.0002047	0.000998	129.25	323.98	2.50662	210338_s_at	HSPA8	ENSG00000109971	heat shock protein family A (Hsp70) member 8 [Source:HGNC Symbol;Acc:HGNC:5241]	chr11	123057489	123063230	-1	q24.1	49.25	protein_coding	4849
0.0050217	0.0143	879.39	1364.34	1.55146	224187_x_at	HSPA8	ENSG00000109971	heat shock protein family A (Hsp70) member 8 [Source:HGNC Symbol;Acc:HGNC:5241]	chr11	123057489	123063230	-1	q24.1	49.25	protein_coding	4849
0.0069242	0.0187	798.39	1278.16	1.60092	208687_x_at	HSPA8	ENSG00000109971	heat shock protein family A (Hsp70) member 8 [Source:HGNC Symbol;Acc:HGNC:5241]	chr11	123057489	123063230	-1	q24.1	49.25	protein_coding	4849
0.0013439	0.00477	444.3	162.55	0.365856	205011_at	VWA5A	ENSG00000110002	von Willebrand factor A domain containing 5A [Source:HGNC Symbol;Acc:HGNC:6658]	chr11	124115404	124147721	1	q24.2	39.28	protein_coding	6361
0.0001169	0.000624	177.31	82.03	0.462636	224391_s_at	SIAE	ENSG00000110013	sialic acid acetylesterase [Source:HGNC Symbol;Acc:HGNC:18187]	chr11	124633113	124695707	-1	q24.2	40.66	protein_coding	8079
0.0005202	0.00217	22.42	47.04	2.09813	212611_at	DTX4	ENSG00000110042	deltex E3 ubiquitin ligase 4 [Source:HGNC Symbol;Acc:HGNC:29151]	chr11	59171430	59208588	1	q12.1	47.6	protein_coding	6433
0.0001734	0.000868	35.5	62.88	1.77127	208112_x_at	EHD1	ENSG00000110047	EH domain containing 1 [Source:HGNC Symbol;Acc:HGNC:3242]	chr11	64851642	64888296	-1	q13.1	54.84	protein_coding	7084
0.0002973	0.00136	28.29	50.74	1.79357	209039_x_at	EHD1	ENSG00000110047	EH domain containing 1 [Source:HGNC Symbol;Acc:HGNC:3242]	chr11	64851642	64888296	-1	q13.1	54.84	protein_coding	7084
2.3e-06	2.34e-05	117.94	58.55	0.496439	1563051_at	OSBP	ENSG00000110048	oxysterol binding protein [Source:HGNC Symbol;Acc:HGNC:8503]	chr11	59574398	59615774	-1	q12.1	42.65	protein_coding	5122
0.0011062	0.00407	5.4	9.76	1.80741	219607_s_at	MS4A4A	ENSG00000110079	membrane spanning 4-domains A4A [Source:HGNC Symbol;Acc:HGNC:13371]	chr11	60185657	60318080	1	q12.2	38.48	protein_coding	6501
0.0074434	0.0198	28.67	45.11	1.57342	210688_s_at	CPT1A	ENSG00000110090	carnitine palmitoyltransferase 1A [Source:HGNC Symbol;Acc:HGNC:2328]	chr11	68754620	68844410	-1	q13.3	50.04	protein_coding	6571
6.3e-06	5.34e-05	35.68	59.16	1.65807	201361_at	TMEM109	ENSG00000110108	transmembrane protein 109 [Source:HGNC Symbol;Acc:HGNC:28771]	chr11	60914158	60923443	1	q12.2	51.06	protein_coding	2137
0.0003575	0.00159	39.44	72.42	1.83621	204218_at	ANAPC15	ENSG00000110200	anaphase promoting complex subunit 15 [Source:HGNC Symbol;Acc:HGNC:24531]	chr11	72106378	72112780	-1	q13.4	52.32	protein_coding	2883
7.7e-06	6.34e-05	35.63	76.58	2.14931	204715_at	PANX1	ENSG00000110218	pannexin 1 [Source:HGNC Symbol;Acc:HGNC:8599]	chr11	94128841	94181968	1	q21	43.15	protein_coding	2852
0.0001872	0.000924	84.62	202.91	2.3979	227107_at	PANX1	ENSG00000110218	pannexin 1 [Source:HGNC Symbol;Acc:HGNC:8599]	chr11	94128841	94181968	1	q21	43.15	protein_coding	2852
0.0099279	0.0251	10.7	21.32	1.99252	235295_at	PANX1	ENSG00000110218	pannexin 1 [Source:HGNC Symbol;Acc:HGNC:8599]	chr11	94128841	94181968	1	q21	43.15	protein_coding	2852
0.0007243	0.00287	12.02	5.98	0.497504	1565544_at	RNF141	ENSG00000110315	ring finger protein 141 [Source:HGNC Symbol;Acc:HGNC:21159]	chr11	10511673	10541230	-1	p15.4	36.1	protein_coding	7825
< 1e-07	< 1e-07	73.5	9.05	0.123129	236325_at	CEP126	ENSG00000110318	centrosomal protein 126 [Source:HGNC Symbol;Acc:HGNC:29264]	chr11	101915010	102001062	1	q22.1	36.41	protein_coding	8200
< 1e-07	< 1e-07	265.89	16.37	0.0615668	232166_at	CEP126	ENSG00000110318	centrosomal protein 126 [Source:HGNC Symbol;Acc:HGNC:29264]	chr11	101915010	102001062	1	q22.1	36.41	protein_coding	8200
< 1e-07	< 1e-07	546.17	20.24	0.0370581	235956_at	CEP126	ENSG00000110318	centrosomal protein 126 [Source:HGNC Symbol;Acc:HGNC:29264]	chr11	101915010	102001062	1	q22.1	36.41	protein_coding	8200
2.3e-06	2.34e-05	30.3	78.33	2.58515	225234_at	CBL	ENSG00000110395	Cbl proto-oncogene [Source:HGNC Symbol;Acc:HGNC:1541]	chr11	119206298	119313926	1	q23.3	42.19	protein_coding	11718
3.4e-06	3.22e-05	163.51	361.76	2.21246	229010_at	CBL	ENSG00000110395	Cbl proto-oncogene [Source:HGNC Symbol;Acc:HGNC:1541]	chr11	119206298	119313926	1	q23.3	42.19	protein_coding	11718
3.46e-05	0.000223	35.89	86.46	2.40903	225231_at	CBL	ENSG00000110395	Cbl proto-oncogene [Source:HGNC Symbol;Acc:HGNC:1541]	chr11	119206298	119313926	1	q23.3	42.19	protein_coding	11718
0.0002597	0.00121	10.84	29.21	2.69465	243475_at	CBL	ENSG00000110395	Cbl proto-oncogene [Source:HGNC Symbol;Acc:HGNC:1541]	chr11	119206298	119313926	1	q23.3	42.19	protein_coding	11718
9.2e-06	7.38e-05	30.82	8.91	0.289098	213697_at	HIPK3	ENSG00000110422	homeodomain interacting protein kinase 3 [Source:HGNC Symbol;Acc:HGNC:4915]	chr11	33256672	33357023	1	p13	38.83	protein_coding	8164
0.0013948	0.00492	204.98	350.33	1.70909	238686_at	FBXO3	ENSG00000110429	F-box protein 3 [Source:HGNC Symbol;Acc:HGNC:13582]	chr11	33740939	33774543	-1	p13	37.03	protein_coding	12446
0.0004455	0.00191	65.49	134.72	2.05711	218072_at	COMMD9	ENSG00000110442	COMM domain containing 9 [Source:HGNC Symbol;Acc:HGNC:25014]	chr11	36269284	36289449	-1	p13	42.17	protein_coding	6592
2.23e-05	0.000155	8.15	17.37	2.13129	219593_at	SLC15A3	ENSG00000110446	solute carrier family 15 member 3 [Source:HGNC Symbol;Acc:HGNC:18068]	chr11	60937060	60952653	-1	q12.2	52.91	protein_coding	6949
0.0031727	0.00977	96.42	58.46	0.606306	228264_at	ACCS	ENSG00000110455	1-aminocyclopropane-1-carboxylate synthase homolog (inactive) [Source:HGNC Symbol;Acc:HGNC:23989]	chr11	44065925	44084237	1	p11.2	49.01	protein_coding	5841
1.1e-06	1.27e-05	21.84	54.88	2.51282	209035_at	MDK	ENSG00000110492	midkine [Source:HGNC Symbol;Acc:HGNC:6972]	chr11	46380756	46383837	1	p11.2	66.26	protein_coding	2196
7e-07	8.64e-06	20.56	6.03	0.293288	231930_at	ELMOD1	ENSG00000110675	ELMO domain containing 1 [Source:HGNC Symbol;Acc:HGNC:25334]	chr11	107591091	107666779	1	q22.3	38.98	protein_coding	5856
1.4e-06	1.54e-05	184.39	40.51	0.219697	227497_at	SOX6	ENSG00000110693	SRY-box transcription factor 6 [Source:HGNC Symbol;Acc:HGNC:16421]	chr11	15966449	16739591	-1	p15.2	36.07	protein_coding	20093
2e-06	2.07e-05	88.09	23.46	0.266319	227498_at	SOX6	ENSG00000110693	SRY-box transcription factor 6 [Source:HGNC Symbol;Acc:HGNC:16421]	chr11	15966449	16739591	-1	p15.2	36.07	protein_coding	20093
1.07e-05	8.4e-05	315.2	75.22	0.238642	228214_at	SOX6	ENSG00000110693	SRY-box transcription factor 6 [Source:HGNC Symbol;Acc:HGNC:16421]	chr11	15966449	16739591	-1	p15.2	36.07	protein_coding	20093
0.0012227	0.00441	9.34	5.12	0.54818	1570486_at	SOX6	ENSG00000110693	SRY-box transcription factor 6 [Source:HGNC Symbol;Acc:HGNC:16421]	chr11	15966449	16739591	-1	p15.2	36.07	protein_coding	20093
5.23e-05	0.000314	26.37	14.75	0.559348	1555365_x_at	C11orf58	ENSG00000110696	chromosome 11 open reading frame 58 [Source:HGNC Symbol;Acc:HGNC:16990]	chr11	16613132	16758340	1	p15.2	38.18	protein_coding	10342
0.0025736	0.00821	11.55	7.62	0.65974	1555364_at	C11orf58	ENSG00000110696	chromosome 11 open reading frame 58 [Source:HGNC Symbol;Acc:HGNC:16990]	chr11	16613132	16758340	1	p15.2	38.18	protein_coding	10342
0.0078868	0.0208	153.72	228.1	1.48387	201784_s_at	C11orf58	ENSG00000110696	chromosome 11 open reading frame 58 [Source:HGNC Symbol;Acc:HGNC:16990]	chr11	16613132	16758340	1	p15.2	38.18	protein_coding	10342
8.23e-05	0.00046	29.68	17.36	0.584906	203826_s_at	PITPNM1	ENSG00000110697	phosphatidylinositol transfer protein membrane associated 1 [Source:HGNC Symbol;Acc:HGNC:9003]	chr11	67491768	67506263	-1	q13.2	62.46	protein_coding	6442
6e-07	7.62e-06	6.11	10.4	1.70213	201781_s_at	AIP	ENSG00000110711	aryl hydrocarbon receptor interacting protein [Source:HGNC Symbol;Acc:HGNC:358]	chr11	67468174	67491154	1	q13.2	52.61	protein_coding	2961
8.43e-05	0.00047	29.24	51.69	1.76778	201782_s_at	AIP	ENSG00000110711	aryl hydrocarbon receptor interacting protein [Source:HGNC Symbol;Acc:HGNC:358]	chr11	67468174	67491154	1	q13.2	52.61	protein_coding	2961
2.24e-05	0.000156	24.58	60.21	2.44955	203189_s_at	NDUFS8	ENSG00000110717	NADH:ubiquinone oxidoreductase core subunit S8 [Source:HGNC Symbol;Acc:HGNC:7715]	chr11	68030617	68036644	1	q13.2	57.63	protein_coding	4523
< 1e-07	< 1e-07	135.23	7.08	0.0523552	1569675_at	POU2AF1	ENSG00000110777	POU class 2 homeobox associating factor 1 [Source:HGNC Symbol;Acc:HGNC:9211]	chr11	111352255	111455630	-1	q23.1	45.99	protein_coding	6996
1.9e-06	1.99e-05	184	93.18	0.506413	220546_at	KMT2A	ENSG00000118058	lysine methyltransferase 2A [Source:HGNC Symbol;Acc:HGNC:7132]	chr11	118436490	118526832	1	q23.3	41.25	protein_coding	31279
0.0018267	0.00617	16.44	8.84	0.537713	244110_at	KMT2A	ENSG00000118058	lysine methyltransferase 2A [Source:HGNC Symbol;Acc:HGNC:7132]	chr11	118436490	118526832	1	q23.3	41.25	protein_coding	31279
< 1e-07	< 1e-07	121.49	31.24	0.257141	218483_s_at	IFT46	ENSG00000118096	intraflagellar transport 46 [Source:HGNC Symbol;Acc:HGNC:26146]	chr11	118544528	118572970	-1	q23.3	45	protein_coding	3773
0.0005512	0.00227	9.87	17.83	1.80648	217073_x_at	APOA1	ENSG00000118137	apolipoprotein A1 [Source:HGNC Symbol;Acc:HGNC:600]	chr11	116835751	116837622	-1	q23.3	62.61	protein_coding	1096
0.0009883	0.00371	8.63	17.04	1.97451	204450_x_at	APOA1	ENSG00000118137	apolipoprotein A1 [Source:HGNC Symbol;Acc:HGNC:600]	chr11	116835751	116837622	-1	q23.3	62.61	protein_coding	1096
0.0067527	0.0183	102	66.72	0.654118	221208_s_at	MSANTD2	ENSG00000120458	Myb/SANT DNA binding domain containing 2 [Source:HGNC Symbol;Acc:HGNC:26266]	chr11	124766498	124800706	-1	q24.2	40.11	protein_coding	4534
9.76e-05	0.000535	63.5	14.26	0.224567	220403_s_at	TP53AIP1	ENSG00000120471	tumor protein p53 regulated apoptosis inducing protein 1 [Source:HGNC Symbol;Acc:HGNC:29984]	chr11	128934731	128943399	-1	q24.3	54.18	protein_coding	3445
0.0007465	0.00294	29.47	9.14	0.310146	220402_at	TP53AIP1	ENSG00000120471	tumor protein p53 regulated apoptosis inducing protein 1 [Source:HGNC Symbol;Acc:HGNC:29984]	chr11	128934731	128943399	-1	q24.3	54.18	protein_coding	3445
3e-07	4.21e-06	5.46	13.96	2.55678	221258_s_at	KIF18A	ENSG00000121621	kinesin family member 18A [Source:HGNC Symbol;Acc:HGNC:29441]	chr11	28020619	28108156	-1	p14.1	33.97	protein_coding	4517
3.4e-06	3.22e-05	59.71	26.68	0.446826	212695_at	CRY2	ENSG00000121671	cryptochrome circadian regulator 2 [Source:HGNC Symbol;Acc:HGNC:2385]	chr11	45847118	45883248	1	p11.2	49.13	protein_coding	6200
0.0047642	0.0137	5.53	7.82	1.4141	228293_at	DEPDC7	ENSG00000121690	DEP domain containing 7 [Source:HGNC Symbol;Acc:HGNC:29899]	chr11	33015876	33033582	1	p13	38.49	protein_coding	3314
0.0013906	0.00491	176.09	102.42	0.581634	201432_at	CAT	ENSG00000121691	catalase [Source:HGNC Symbol;Acc:HGNC:1516]	chr11	34438934	34472060	1	p13	40.59	protein_coding	3579
9.99e-05	0.000546	1290.8	277.36	0.214874	205979_at	SCGB2A1	ENSG00000124939	secretoglobin family 2A member 1 [Source:HGNC Symbol;Acc:HGNC:7051]	chr11	62208673	62213943	1	q12.3	44.24	protein_coding	520
0.0075998	0.0201	10.62	6.8	0.640301	233308_at	COPB1	ENSG00000129083	COPI coat complex subunit beta 1 [Source:HGNC Symbol;Acc:HGNC:2231]	chr11	14443440	14500027	-1	p15.2	38.27	protein_coding	5098
3.2e-06	3.07e-05	186.94	362.45	1.93886	210759_s_at	PSMA1	ENSG00000129084	proteasome 20S subunit alpha 1 [Source:HGNC Symbol;Acc:HGNC:9530]	chr11	14504874	14643635	-1	p15.2	40.21	protein_coding	3050
0.0014407	0.00507	60.19	32.74	0.543944	214601_at	TPH1	ENSG00000129167	tryptophan hydroxylase 1 [Source:HGNC Symbol;Acc:HGNC:12008]	chr11	18017555	18046269	-1	p15.1	37.58	protein_coding	5664
5e-07	6.53e-06	5.65	13.56	2.4	219990_at	E2F8	ENSG00000129173	E2F transcription factor 8 [Source:HGNC Symbol;Acc:HGNC:24727]	chr11	19224063	19241620	-1	p15.1	41.92	protein_coding	4134
< 1e-07	< 1e-07	27.51	5.35	0.194475	228086_at	STK33	ENSG00000130413	serine/threonine kinase 33 [Source:HGNC Symbol;Acc:HGNC:14568]	chr11	8391868	8594289	-1	p15.4	37.65	protein_coding	7599
< 1e-07	< 1e-07	200.54	20.17	0.100578	228035_at	STK33	ENSG00000130413	serine/threonine kinase 33 [Source:HGNC Symbol;Acc:HGNC:14568]	chr11	8391868	8594289	-1	p15.4	37.65	protein_coding	7599
6.2e-05	0.000364	184.25	331.33	1.79826	202066_at	PPFIA1	ENSG00000131626	PTPRF interacting protein alpha 1 [Source:HGNC Symbol;Acc:HGNC:9245]	chr11	70270690	70385312	1	q13.3	45.09	protein_coding	11714
1.2e-05	9.23e-05	87.77	33.2	0.378261	202109_at	ARFIP2	ENSG00000132254	ADP ribosylation factor interacting protein 2 [Source:HGNC Symbol;Acc:HGNC:17160]	chr11	6474683	6481479	-1	p15.4	52.8	protein_coding	5312
1.3e-06	1.45e-05	12.99	7.06	0.543495	1562273_at	CNGA4	ENSG00000132259	cyclic nucleotide gated channel subunit alpha 4 [Source:HGNC Symbol;Acc:HGNC:2152]	chr11	6234765	6244479	1	p15.4	48.78	protein_coding	2220
0.002794	0.00879	607.38	305.86	0.503573	213293_s_at	TRIM22	ENSG00000132274	tripartite motif containing 22 [Source:HGNC Symbol;Acc:HGNC:16379]	chr11	5689697	5737089	1	p15.4	38.58	protein_coding	5944
8.53e-05	0.000474	25.21	67.51	2.67791	204942_s_at	ALDH3B2	ENSG00000132746	aldehyde dehydrogenase 3 family member B2 [Source:HGNC Symbol;Acc:HGNC:411]	chr11	67662160	67681224	-1	q13.2	52.58	protein_coding	3663
< 1e-07	< 1e-07	1875.3	3566.58	1.90187	224564_s_at	RTN3	ENSG00000133318	reticulon 3 [Source:HGNC Symbol;Acc:HGNC:10469]	chr11	63681446	63759891	1	q13.1	42.12	protein_coding	5792
< 1e-07	< 1e-07	110.9	26.22	0.236429	207992_s_at	AMPD3	ENSG00000133805	adenosine monophosphate deaminase 3 [Source:HGNC Symbol;Acc:HGNC:470]	chr11	10308313	10507579	1	p15.4	44.29	protein_coding	6793
3.78e-05	0.00024	184.33	75.1	0.407421	233914_s_at	SBF2	ENSG00000133812	SET binding factor 2 [Source:HGNC Symbol;Acc:HGNC:2135]	chr11	9778667	10294219	-1	p15.4	38.32	protein_coding	16816
0.0027815	0.00875	387.33	255.03	0.658431	226169_at	SBF2	ENSG00000133812	SET binding factor 2 [Source:HGNC Symbol;Acc:HGNC:2135]	chr11	9778667	10294219	-1	p15.4	38.32	protein_coding	16816
0.0078201	0.0206	14.28	22.97	1.60854	212472_at	MICAL2	ENSG00000133816	microtubule associated monooxygenase, calponin and LIM domain containing 2 [Source:HGNC Symbol;Acc:HGNC:24693]	chr11	12094008	12359144	1	p15.3	45.98	protein_coding	20192
1e-07	1.6e-06	12.04	21.51	1.78654	202645_s_at	MEN1	ENSG00000133895	menin 1 [Source:HGNC Symbol;Acc:HGNC:7010]	chr11	64803510	64811294	-1	q13.1	57.78	protein_coding	5102
7.51e-05	0.000427	1706.77	3488.47	2.0439	200650_s_at	LDHA	ENSG00000134333	lactate dehydrogenase A [Source:HGNC Symbol;Acc:HGNC:6535]	chr11	18394560	18408425	1	p15.1	43.95	protein_coding	6038
0.000379	0.00167	416.18	209.68	0.50382	203409_at	DDB2	ENSG00000134574	damage specific DNA binding protein 2 [Source:HGNC Symbol;Acc:HGNC:2718]	chr11	47214465	47239217	1	p11.2	47.15	protein_coding	4842
0.0046681	0.0134	24.72	11.22	0.453883	211303_x_at	FOLH1B	ENSG00000134612	folate hydrolase 1B [Source:HGNC Symbol;Acc:HGNC:13636]	chr11	89639237	89698718	1	q14.3	35.28	transcribed_unprocessed_pseudogene	2495
0.0003792	0.00167	4.53	8.77	1.93598	210692_s_at	SLC43A3	ENSG00000134802	solute carrier family 43 member 3 [Source:HGNC Symbol;Acc:HGNC:17466]	chr11	57406954	57427580	-1	q12.1	48.17	protein_coding	4517
< 1e-07	< 1e-07	19.65	170.63	8.68346	213113_s_at	SLC43A3	ENSG00000134802	solute carrier family 43 member 3 [Source:HGNC Symbol;Acc:HGNC:17466]	chr11	57406954	57427580	-1	q12.1	48.17	protein_coding	4517
1.4e-06	1.54e-05	37.47	112.35	2.9984	218408_at	TIMM10	ENSG00000134809	translocase of inner mitochondrial membrane 10 [Source:HGNC Symbol;Acc:HGNC:11814]	chr11	57528464	57530803	-1	q12.1	47.99	protein_coding	776
9.15e-05	0.000505	58.39	189.59	3.24696	1555764_s_at	TIMM10	ENSG00000134809	translocase of inner mitochondrial membrane 10 [Source:HGNC Symbol;Acc:HGNC:11814]	chr11	57528464	57530803	-1	q12.1	47.99	protein_coding	776
0.0003033	0.00138	5.38	9.86	1.83271	213592_at	APLNR	ENSG00000134817	apelin receptor [Source:HGNC Symbol;Acc:HGNC:339]	chr11	57233577	57237235	-1	q12.1	55.26	protein_coding	3659
0.0038426	0.0115	7.7	11	1.42857	202218_s_at	FADS2	ENSG00000134824	fatty acid desaturase 2 [Source:HGNC Symbol;Acc:HGNC:3575]	chr11	61792980	61867354	1	q12.2	51.23	protein_coding	10553
3e-07	4.21e-06	97.16	31.58	0.325031	203431_s_at	ARHGAP32	ENSG00000134909	Rho GTPase activating protein 32 [Source:HGNC Symbol;Acc:HGNC:17399]	chr11	128965060	129279324	-1	q24.3	36.86	protein_coding	12968
8.65e-05	0.00048	10.08	5.91	0.58631	242196_at	ARHGAP32	ENSG00000134909	Rho GTPase activating protein 32 [Source:HGNC Symbol;Acc:HGNC:17399]	chr11	128965060	129279324	-1	q24.3	36.86	protein_coding	12968
0.0005741	0.00235	11.71	7.19	0.614005	210791_s_at	ARHGAP32	ENSG00000134909	Rho GTPase activating protein 32 [Source:HGNC Symbol;Acc:HGNC:17399]	chr11	128965060	129279324	-1	q24.3	36.86	protein_coding	12968
< 1e-07	< 1e-07	1442.51	617.39	0.427997	229648_at	ARHGAP32	ENSG00000134909	Rho GTPase activating protein 32 [Source:HGNC Symbol;Acc:HGNC:17399]	chr11	128965060	129279324	-1	q24.3	36.86	protein_coding	12968
0.0067311	0.0183	17.73	8.88	0.500846	235649_at	ADAMTS8	ENSG00000134917	ADAM metallopeptidase with thrombospondin type 1 motif 8 [Source:HGNC Symbol;Acc:HGNC:224]	chr11	130404923	130428609	-1	q24.3	53.31	protein_coding	4141
0.0075021	0.0199	13.99	9.14	0.653324	220677_s_at	ADAMTS8	ENSG00000134917	ADAM metallopeptidase with thrombospondin type 1 motif 8 [Source:HGNC Symbol;Acc:HGNC:224]	chr11	130404923	130428609	-1	q24.3	53.31	protein_coding	4141
0.0077947	0.0206	60.73	147.62	2.43076	1555355_a_at	ETS1	ENSG00000134954	ETS proto-oncogene 1, transcription factor [Source:HGNC Symbol;Acc:HGNC:3488]	chr11	128458761	128587558	-1	q24.3	42.5	protein_coding	7149
0.008931	0.023	327.14	529.12	1.61741	224833_at	ETS1	ENSG00000134954	ETS proto-oncogene 1, transcription factor [Source:HGNC Symbol;Acc:HGNC:3488]	chr11	128458761	128587558	-1	q24.3	42.5	protein_coding	7149
6.49e-05	0.000379	778.13	261.2	0.335677	232360_at	EHF	ENSG00000135373	ETS homologous factor [Source:HGNC Symbol;Acc:HGNC:3246]	chr11	34621093	34663288	1	p13	43.51	protein_coding	6617
0.0009492	0.00359	658.18	269.33	0.409204	232361_s_at	EHF	ENSG00000135373	ETS homologous factor [Source:HGNC Symbol;Acc:HGNC:3246]	chr11	34621093	34663288	1	p13	43.51	protein_coding	6617
0.0020067	0.00666	3660.92	2256.23	0.616301	225645_at	EHF	ENSG00000135373	ETS homologous factor [Source:HGNC Symbol;Acc:HGNC:3246]	chr11	34621093	34663288	1	p13	43.51	protein_coding	6617
1e-07	1.6e-06	323.61	697.49	2.15534	225340_s_at	CAPRIN1	ENSG00000135387	cell cycle associated protein 1 [Source:HGNC Symbol;Acc:HGNC:6743]	chr11	34051731	34102610	1	p13	40.01	protein_coding	9095
2.7e-06	2.66e-05	146.7	270.02	1.84063	200723_s_at	CAPRIN1	ENSG00000135387	cell cycle associated protein 1 [Source:HGNC Symbol;Acc:HGNC:6743]	chr11	34051731	34102610	1	p13	40.01	protein_coding	9095
2e-07	2.96e-06	330.21	676.56	2.04888	203620_s_at	FCHSD2	ENSG00000137478	FCH and double SH3 domains 2 [Source:HGNC Symbol;Acc:HGNC:29114]	chr11	72836745	73142318	-1	q13.4	38.88	protein_coding	5245
2.6e-06	2.58e-05	191.57	369.85	1.93063	209323_at	THAP12	ENSG00000137492	THAP domain containing 12 [Source:HGNC Symbol;Acc:HGNC:9440]	chr11	76349898	76381132	-1	q13.5	40.28	protein_coding	8802
0.0003782	0.00167	9.21	21.8	2.36699	222868_s_at	IL18BP	ENSG00000137496	interleukin 18 binding protein [Source:HGNC Symbol;Acc:HGNC:5987]	chr11	71998613	72005715	1	q13.4	57.1	protein_coding	4251
0.0072144	0.0193	6.82	9.88	1.44868	228390_at	RAB30	ENSG00000137502	RAB30, member RAS oncogene family [Source:HGNC Symbol;Acc:HGNC:9770]	chr11	82973133	83071923	-1	q14.1	41.21	protein_coding	11832
0.0078057	0.0206	271.76	425.1	1.56425	202978_s_at	CREBZF	ENSG00000137504	CREB/ATF bZIP transcription factor [Source:HGNC Symbol;Acc:HGNC:24905]	chr11	85657742	85682908	-1	q14.1	40.03	protein_coding	7580
4e-07	5.38e-06	1378.22	423.42	0.307222	212560_at	SORL1	ENSG00000137642	sortilin related receptor 1 [Source:HGNC Symbol;Acc:HGNC:11185]	chr11	121452314	121633763	1	q24.1	43.54	protein_coding	19408
1.8e-06	1.9e-05	405.94	85.68	0.211066	230707_at	SORL1	ENSG00000137642	sortilin related receptor 1 [Source:HGNC Symbol;Acc:HGNC:11185]	chr11	121452314	121633763	1	q24.1	43.54	protein_coding	19408
0.0001522	0.000776	231.73	92.08	0.397359	203509_at	SORL1	ENSG00000137642	sortilin related receptor 1 [Source:HGNC Symbol;Acc:HGNC:11185]	chr11	121452314	121633763	1	q24.1	43.54	protein_coding	19408
< 1e-07	< 1e-07	6.16	120.91	19.6282	218960_at	TMPRSS4	ENSG00000137648	transmembrane serine protease 4 [Source:HGNC Symbol;Acc:HGNC:11878]	chr11	118077012	118121890	1	q23.3	48.55	protein_coding	9948
1.7e-06	1.81e-05	31.83	5.68	0.178448	217287_s_at	TRPC6	ENSG00000137672	transient receptor potential cation channel subfamily C member 6 [Source:HGNC Symbol;Acc:HGNC:12338]	chr11	101451564	101872562	-1	q22.1	37.74	protein_coding	5616
< 1e-07	< 1e-07	45.13	5.71	0.126523	206528_at	TRPC6	ENSG00000137672	transient receptor potential cation channel subfamily C member 6 [Source:HGNC Symbol;Acc:HGNC:12338]	chr11	101451564	101872562	-1	q22.1	37.74	protein_coding	5616
2.5e-06	2.5e-05	26.98	11.85	0.439214	241198_s_at	CFAP300	ENSG00000137691	cilia and flagella associated protein 300 [Source:HGNC Symbol;Acc:HGNC:28188]	chr11	102047437	102084554	1	q22.1	39.98	protein_coding	2647
< 1e-07	< 1e-07	225.91	22.84	0.101102	224463_s_at	CFAP300	ENSG00000137691	cilia and flagella associated protein 300 [Source:HGNC Symbol;Acc:HGNC:28188]	chr11	102047437	102084554	1	q22.1	39.98	protein_coding	2647
0.0004077	0.00178	153.62	325.81	2.12088	223151_at	DCUN1D5	ENSG00000137692	defective in cullin neddylation 1 domain containing 5 [Source:HGNC Symbol;Acc:HGNC:28409]	chr11	103050686	103092194	-1	q22.3	35.6	protein_coding	13069
5.9e-06	5.05e-05	135.37	313.41	2.31521	213342_at	YAP1	ENSG00000137693	Yes1 associated transcriptional regulator [Source:HGNC Symbol;Acc:HGNC:16262]	chr11	102110447	102233424	1	q22.1	38.64	protein_coding	6311
3.24e-05	0.000212	372.23	683.97	1.83749	224894_at	YAP1	ENSG00000137693	Yes1 associated transcriptional regulator [Source:HGNC Symbol;Acc:HGNC:16262]	chr11	102110447	102233424	1	q22.1	38.64	protein_coding	6311
0.0019931	0.00663	515.52	892.75	1.73175	224895_at	YAP1	ENSG00000137693	Yes1 associated transcriptional regulator [Source:HGNC Symbol;Acc:HGNC:16262]	chr11	102110447	102233424	1	q22.1	38.64	protein_coding	6311
6.74e-05	0.000391	20.72	122.55	5.91458	207109_at	POU2F3	ENSG00000137709	POU class 2 homeobox 3 [Source:HGNC Symbol;Acc:HGNC:19864]	chr11	120236640	120319945	1	q23.3	48.07	protein_coding	6700
0.0007144	0.00283	37.7	69.86	1.85305	203647_s_at	FDX1	ENSG00000137714	ferredoxin 1 [Source:HGNC Symbol;Acc:HGNC:3638]	chr11	110429948	110464884	1	q22.3	39.76	protein_coding	3144
0.0003909	0.00172	38.41	19.48	0.50716	49327_at	SIRT3	ENSG00000142082	sirtuin 3 [Source:HGNC Symbol;Acc:HGNC:14931]	chr11	215030	236931	-1	p15.5	48.53	protein_coding	5553
0.0040176	0.0119	40.25	24.72	0.614161	221913_at	SIRT3	ENSG00000142082	sirtuin 3 [Source:HGNC Symbol;Acc:HGNC:14931]	chr11	215030	236931	-1	p15.5	48.53	protein_coding	5553
0.0002862	0.00132	33.95	52.16	1.53638	223033_s_at	SCYL1	ENSG00000142186	SCY1 like pseudokinase 1 [Source:HGNC Symbol;Acc:HGNC:14372]	chr11	65525077	65538704	1	q13.1	57.59	protein_coding	4282
< 1e-07	< 1e-07	8.48	98.84	11.6557	224753_at	CDCA5	ENSG00000146670	cell division cycle associated 5 [Source:HGNC Symbol;Acc:HGNC:14626]	chr11	65066300	65084164	-1	q13.1	52.67	protein_coding	3901
0.0036221	0.0109	358.32	520.1	1.4515	223174_at	BTBD10	ENSG00000148925	BTB domain containing 10 [Source:HGNC Symbol;Acc:HGNC:21445]	chr11	13388008	13463297	-1	p15.3	36.23	protein_coding	3488
6.2e-06	5.27e-05	17.78	5.62	0.316085	205848_at	GAS2	ENSG00000148935	growth arrest specific 2 [Source:HGNC Symbol;Acc:HGNC:4167]	chr11	22625509	22813055	1	p14.3	36.06	protein_coding	4252
0.0011883	0.0043	4.19	12.54	2.99284	205725_at	SCGB1A1	ENSG00000149021	secretoglobin family 1A member 1 [Source:HGNC Symbol;Acc:HGNC:12523]	chr11	62405103	62423195	1	q12.3	50.41	protein_coding	584
2.9e-06	2.82e-05	35.18	8.82	0.250711	243456_at	ZNF214	ENSG00000149050	zinc finger protein 214 [Source:HGNC Symbol;Acc:HGNC:13006]	chr11	6997085	7020346	-1	p15.4	34.92	protein_coding	5160
1.24e-05	9.51e-05	9.3	4.93	0.530108	220497_at	ZNF214	ENSG00000149050	zinc finger protein 214 [Source:HGNC Symbol;Acc:HGNC:13006]	chr11	6997085	7020346	-1	p15.4	34.92	protein_coding	5160
0.0001072	0.00058	24.18	7.64	0.315964	213661_at	PAMR1	ENSG00000149090	peptidase domain containing associated with muscle regeneration 1 [Source:HGNC Symbol;Acc:HGNC:24554]	chr11	35431823	35530300	-1	p13	41.96	protein_coding	3863
0.000236	0.00112	121.43	60.02	0.494277	215190_at	EIF3M	ENSG00000149100	eukaryotic translation initiation factor 3 subunit M [Source:HGNC Symbol;Acc:HGNC:24460]	chr11	32583798	32606264	1	p13	37.78	protein_coding	7430
< 1e-07	< 1e-07	88.07	22.93	0.260361	239848_at	EIF3M	ENSG00000149100	eukaryotic translation initiation factor 3 subunit M [Source:HGNC Symbol;Acc:HGNC:24460]	chr11	32583798	32606264	1	p13	37.78	protein_coding	7430
0.0072921	0.0195	35.11	54.92	1.56423	227396_at	PTPRJ	ENSG00000149177	protein tyrosine phosphatase receptor type J [Source:HGNC Symbol;Acc:HGNC:9673]	chr11	47980558	48170841	1	p11.2	45.38	protein_coding	9620
0.0045116	0.0131	85.17	50.5	0.592932	203257_s_at	C11orf49	ENSG00000149179	chromosome 11 open reading frame 49 [Source:HGNC Symbol;Acc:HGNC:28720]	chr11	46936689	47164385	1	p11.2	41.37	protein_coding	6693
0.00777	0.0205	168.03	229.6	1.36642	221742_at	CELF1	ENSG00000149187	CUGBP Elav-like family member 1 [Source:HGNC Symbol;Acc:HGNC:2549]	chr11	47465933	47565569	-1	p11.2	43.94	protein_coding	10452
1.6e-06	1.73e-05	35.37	128.23	3.62539	219979_s_at	HIKESHI	ENSG00000149196	heat shock protein nuclear import factor hikeshi [Source:HGNC Symbol;Acc:HGNC:26938]	chr11	86302211	86345943	1	q14.2	37.86	protein_coding	3433
2.5e-06	2.5e-05	105.49	308.29	2.92246	230326_s_at	HIKESHI	ENSG00000149196	heat shock protein nuclear import factor hikeshi [Source:HGNC Symbol;Acc:HGNC:26938]	chr11	86302211	86345943	1	q14.2	37.86	protein_coding	3433
< 1e-07	< 1e-07	37.28	4.96	0.133047	220389_at	CCDC81	ENSG00000149201	coiled-coil domain containing 81 [Source:HGNC Symbol;Acc:HGNC:26281]	chr11	86374736	86423109	1	q14.2	39.88	protein_coding	4544
0.0008571	0.0033	24.87	47.08	1.89304	235684_s_at	SESN3	ENSG00000149212	sestrin 3 [Source:HGNC Symbol;Acc:HGNC:23060]	chr11	95165513	95232541	-1	q21	35.27	protein_coding	10578
0.0001917	0.000942	52.95	116.68	2.20359	212573_at	ENDOD1	ENSG00000149218	endonuclease domain containing 1 [Source:HGNC Symbol;Acc:HGNC:29129]	chr11	95089846	95132645	1	q21	42.67	protein_coding	4651
< 1e-07	< 1e-07	14.71	51.36	3.4915	207714_s_at	SERPINH1	ENSG00000149257	serpin family H member 1 [Source:HGNC Symbol;Acc:HGNC:1546]	chr11	75562056	75572783	1	q13.5	55.42	protein_coding	6281
6e-07	7.62e-06	14.63	38.43	2.62679	226292_at	CAPN5	ENSG00000149260	calpain 5 [Source:HGNC Symbol;Acc:HGNC:1482]	chr11	77066961	77126155	1	q13.5	55.95	protein_coding	6137
0.0003211	0.00145	8.61	18.5	2.14866	209615_s_at	PAK1	ENSG00000149269	p21 (RAC1) activated kinase 1 [Source:HGNC Symbol;Acc:HGNC:8590]	chr11	77322017	77474635	-1	q14.1	39.9	protein_coding	6021
0.0003638	0.00162	1220.68	2292.29	1.87788	208692_at	RPS3	ENSG00000149273	ribosomal protein S3 [Source:HGNC Symbol;Acc:HGNC:10420]	chr11	75399515	75422280	1	q13.4	48.5	protein_coding	5859
0.0011227	0.00411	307.86	160.61	0.521698	231899_at	ZC3H12C	ENSG00000149289	zinc finger CCCH-type containing 12C [Source:HGNC Symbol;Acc:HGNC:29362]	chr11	110093392	110171841	1	q22.3	37.23	protein_coding	9688
1e-07	1.6e-06	47.51	19.77	0.416123	215598_at	TTC12	ENSG00000149292	tetratricopeptide repeat domain 12 [Source:HGNC Symbol;Acc:HGNC:23700]	chr11	113314579	113383544	1	q23.2	43.04	protein_coding	5247
< 1e-07	< 1e-07	134.34	38.67	0.287852	244571_s_at	TTC12	ENSG00000149292	tetratricopeptide repeat domain 12 [Source:HGNC Symbol;Acc:HGNC:23700]	chr11	113314579	113383544	1	q23.2	43.04	protein_coding	5247
0.0028111	0.00883	111.61	173.2	1.55183	209798_at	NPAT	ENSG00000149308	nuclear protein, coactivator of histone transcription [Source:HGNC Symbol;Acc:HGNC:7896]	chr11	108157215	108222638	-1	q22.3	40.27	protein_coding	7530
1.2e-06	1.36e-05	67.7	26.85	0.396603	213713_s_at	GLB1L2	ENSG00000149328	galactosidase beta 1 like 2 [Source:HGNC Symbol;Acc:HGNC:25129]	chr11	134331874	134378341	1	q25	51.13	protein_coding	7280
3.3e-06	3.14e-05	40.39	84.98	2.10399	223009_at	LAMTOR1	ENSG00000149357	late endosomal/lysosomal adaptor, MAPK and MTOR activator 1 [Source:HGNC Symbol;Acc:HGNC:26068]	chr11	72085895	72103297	-1	q13.4	47.92	protein_coding	2688
1.5e-06	1.63e-05	15.37	66.9	4.35264	208962_s_at	FADS1	ENSG00000149485	fatty acid desaturase 1 [Source:HGNC Symbol;Acc:HGNC:3574]	chr11	61799627	61829318	-1	q12.2	50.81	protein_coding	10228
2.61e-05	0.000177	14.71	38.63	2.6261	208964_s_at	FADS1	ENSG00000149485	fatty acid desaturase 1 [Source:HGNC Symbol;Acc:HGNC:3574]	chr11	61799627	61829318	-1	q12.2	50.81	protein_coding	10228
5.17e-05	0.000311	23.9	56.92	2.38159	208963_x_at	FADS1	ENSG00000149485	fatty acid desaturase 1 [Source:HGNC Symbol;Acc:HGNC:3574]	chr11	61799627	61829318	-1	q12.2	50.81	protein_coding	10228
1.06e-05	8.33e-05	89.34	180.04	2.01522	208289_s_at	EI24	ENSG00000149547	EI24 autophagy associated transmembrane protein [Source:HGNC Symbol;Acc:HGNC:13276]	chr11	125569280	125584684	1	q24.2	43.38	protein_coding	3491
0.0044137	0.0128	171.39	242.79	1.41659	216396_s_at	EI24	ENSG00000149547	EI24 autophagy associated transmembrane protein [Source:HGNC Symbol;Acc:HGNC:13276]	chr11	125569280	125584684	1	q24.2	43.38	protein_coding	3491
< 1e-07	< 1e-07	6.82	81.19	11.9047	238075_at	CHEK1	ENSG00000149554	checkpoint kinase 1 [Source:HGNC Symbol;Acc:HGNC:1925]	chr11	125625163	125676255	1	q24.2	37.73	protein_coding	5600
< 1e-07	< 1e-07	5.59	25.23	4.51342	205393_s_at	CHEK1	ENSG00000149554	checkpoint kinase 1 [Source:HGNC Symbol;Acc:HGNC:1925]	chr11	125625163	125676255	1	q24.2	37.73	protein_coding	5600
< 1e-07	< 1e-07	4.92	18.19	3.69715	205394_at	CHEK1	ENSG00000149554	checkpoint kinase 1 [Source:HGNC Symbol;Acc:HGNC:1925]	chr11	125625163	125676255	1	q24.2	37.73	protein_coding	5600
6.71e-05	0.00039	358.08	158.82	0.443532	230518_at	MPZL2	ENSG00000149573	myelin protein zero like 2 [Source:HGNC Symbol;Acc:HGNC:3496]	chr11	118253416	118264536	-1	q23.3	38.82	protein_coding	4740
0.0040026	0.0118	789.2	501.21	0.635086	203780_at	MPZL2	ENSG00000149573	myelin protein zero like 2 [Source:HGNC Symbol;Acc:HGNC:3496]	chr11	118253416	118264536	-1	q23.3	38.82	protein_coding	4740
0.0003032	0.00138	15	35.08	2.33867	243531_at	LTO1	ENSG00000149716	LTO1 maturation factor of ABCE1 [Source:HGNC Symbol;Acc:HGNC:17589]	chr11	69653076	69675416	-1	q13.3	53.52	protein_coding	7872
0.0011079	0.00407	125.27	180.72	1.44264	213384_x_at	PLCB3	ENSG00000149782	phospholipase C beta 3 [Source:HGNC Symbol;Acc:HGNC:9056]	chr11	64251530	64269150	1	q13.1	60.31	protein_coding	4957
0.006634	0.018	310.12	480.1	1.54811	201717_at	MRPL49	ENSG00000149792	mitochondrial ribosomal protein L49 [Source:HGNC Symbol;Acc:HGNC:1176]	chr11	65122183	65127371	1	q13.1	50.97	protein_coding	3080
0.0092687	0.0237	1128.7	1577.07	1.39724	200019_s_at	FAU	ENSG00000149806	FAU ubiquitin like and ribosomal protein S30 fusion [Source:HGNC Symbol;Acc:HGNC:3597]	chr11	65120630	65122177	-1	q13.1	53.42	protein_coding	1548
0.0026008	0.00828	18.94	9.71	0.512672	244632_at	CNTN5	ENSG00000149972	contactin 5 [Source:HGNC Symbol;Acc:HGNC:2175]	chr11	99020949	100358885	1	q22.1	35.04	protein_coding	9107
0.0001722	0.000863	318.82	530.69	1.66454	223067_at	CWC15	ENSG00000150316	CWC15 spliceosome associated protein homolog [Source:HGNC Symbol;Acc:HGNC:26939]	chr11	94962620	94973586	-1	q21	37.35	protein_coding	2734
0.0014602	0.00512	11.09	7.05	0.635708	235876_at	TMEM218	ENSG00000150433	transmembrane protein 218 [Source:HGNC Symbol;Acc:HGNC:27344]	chr11	125094389	125111763	-1	q24.2	40.83	protein_coding	7580
0.0026848	0.0085	17.96	8.81	0.490535	228973_at	DLG2	ENSG00000150672	discs large MAGUK scaffold protein 2 [Source:HGNC Symbol;Acc:HGNC:2901]	chr11	83455012	85627922	-1	q14.1	37.02	protein_coding	16709
0.0059073	0.0164	7.33	15.01	2.04775	229441_at	PRSS23	ENSG00000150687	serine protease 23 [Source:HGNC Symbol;Acc:HGNC:14370]	chr11	86791059	86952910	1	q14.2	42.16	protein_coding	11444
1.8e-05	0.00013	146.79	50.03	0.340827	214724_at	DIXDC1	ENSG00000150764	DIX domain containing 1 [Source:HGNC Symbol;Acc:HGNC:23695]	chr11	111927144	112022653	1	q23.1	43.29	protein_coding	8438
0.0012333	0.00444	88.17	186.78	2.11841	212568_s_at	DLAT	ENSG00000150768	dihydrolipoamide S-acetyltransferase [Source:HGNC Symbol;Acc:HGNC:2896]	chr11	112025408	112064404	1	q23.1	40.93	protein_coding	7550
0.0063123	0.0173	436.99	252.44	0.577679	213149_at	DLAT	ENSG00000150768	dihydrolipoamide S-acetyltransferase [Source:HGNC Symbol;Acc:HGNC:2896]	chr11	112025408	112064404	1	q23.1	40.93	protein_coding	7550
< 1e-07	< 1e-07	53.31	11.97	0.224536	235062_at	PIH1D2	ENSG00000150773	PIH1 domain containing 2 [Source:HGNC Symbol;Acc:HGNC:25210]	chr11	112063218	112074274	-1	q23.1	40.01	protein_coding	3269
1.62e-05	0.000119	16.75	46.8	2.79403	223478_at	TIMM8B	ENSG00000150779	translocase of inner mitochondrial membrane 8 homolog B [Source:HGNC Symbol;Acc:HGNC:11818]	chr11	112084800	112086798	-1	q23.1	46.22	protein_coding	1166
6.41e-05	0.000375	246.46	531.79	2.15771	218357_s_at	TIMM8B	ENSG00000150779	translocase of inner mitochondrial membrane 8 homolog B [Source:HGNC Symbol;Acc:HGNC:11818]	chr11	112084800	112086798	-1	q23.1	46.22	protein_coding	1166
0.0034524	0.0105	15.92	38.13	2.3951	206295_at	IL18	ENSG00000150782	interleukin 18 [Source:HGNC Symbol;Acc:HGNC:5986]	chr11	112143253	112164096	-1	q23.1	39.22	protein_coding	2605
0.0010825	0.004	11.37	23.04	2.02639	227570_at	TMEM86A	ENSG00000151117	transmembrane protein 86A [Source:HGNC Symbol;Acc:HGNC:26890]	chr11	18693122	18704785	1	p15.1	51.95	protein_coding	4243
< 1e-07	1.6e-06	370.83	690.29	1.86147	218101_s_at	NDUFC2	ENSG00000151366	NADH:ubiquinone oxidoreductase subunit C2 [Source:HGNC Symbol;Acc:HGNC:7706]	chr11	78068297	78079862	-1	q14.1	44.35	protein_coding	2302
0.0003937	0.00173	10.95	16.92	1.54521	212789_at	NCAPD3	ENSG00000151503	non-SMC condensin II complex subunit D3 [Source:HGNC Symbol;Acc:HGNC:28952]	chr11	134150113	134225454	-1	q25	43.33	protein_coding	10970
7.1e-06	5.9e-05	152.14	29.3	0.192586	230323_s_at	TMEM45B	ENSG00000151715	transmembrane protein 45B [Source:HGNC Symbol;Acc:HGNC:25194]	chr11	129815848	129860003	1	q24.3	44.32	protein_coding	2998
1.64e-05	0.00012	93.83	16.85	0.17958	228731_at	GUCY1A2	ENSG00000152402	guanylate cyclase 1 soluble subunit alpha 2 [Source:HGNC Symbol;Acc:HGNC:4684]	chr11	106674019	107018476	-1	q22.3	36.02	protein_coding	16306
0.0007041	0.0028	146.03	31.72	0.217216	236335_at	GUCY1A2	ENSG00000152402	guanylate cyclase 1 soluble subunit alpha 2 [Source:HGNC Symbol;Acc:HGNC:4684]	chr11	106674019	107018476	-1	q22.3	36.02	protein_coding	16306
0.0010423	0.00387	37.44	8.04	0.214744	242342_at	GUCY1A2	ENSG00000152402	guanylate cyclase 1 soluble subunit alpha 2 [Source:HGNC Symbol;Acc:HGNC:4684]	chr11	106674019	107018476	-1	q22.3	36.02	protein_coding	16306
0.0001219	0.000646	13.05	35.33	2.70728	213869_x_at	THY1	ENSG00000154096	Thy-1 cell surface antigen [Source:HGNC Symbol;Acc:HGNC:11801]	chr11	119415476	119424985	-1	q23.3	55.73	protein_coding	6900
0.0001663	0.000837	30.75	112.76	3.66699	208851_s_at	THY1	ENSG00000154096	Thy-1 cell surface antigen [Source:HGNC Symbol;Acc:HGNC:11801]	chr11	119415476	119424985	-1	q23.3	55.73	protein_coding	6900
7.65e-05	0.000434	42.08	96.2	2.28612	231997_at	TBCEL	ENSG00000154114	tubulin folding cofactor E like [Source:HGNC Symbol;Acc:HGNC:28115]	chr11	121024072	121090776	1	q23.3	36.59	protein_coding	7021
0.0002572	0.0012	15.18	33.76	2.22398	238462_at	UBASH3B	ENSG00000154127	ubiquitin associated and SH3 domain containing B [Source:HGNC Symbol;Acc:HGNC:29884]	chr11	122655722	122814473	1	q24.1	45.84	protein_coding	8964
1.19e-05	9.18e-05	56.93	20.84	0.366064	219550_at	ROBO3	ENSG00000154134	roundabout guidance receptor 3 [Source:HGNC Symbol;Acc:HGNC:13433]	chr11	124865432	124881471	1	q24.2	56.28	protein_coding	6981
9.3e-06	7.45e-05	84.9	31.47	0.370671	230320_at	TBRG1	ENSG00000154144	transforming growth factor beta regulator 1 [Source:HGNC Symbol;Acc:HGNC:29551]	chr11	124622836	124635926	1	q24.2	39.72	protein_coding	7155
4.4e-06	3.97e-05	74.63	231.19	3.09782	201649_at	UBE2L6	ENSG00000156587	ubiquitin conjugating enzyme E2 L6 [Source:HGNC Symbol;Acc:HGNC:12490]	chr11	57551656	57568284	-1	q12.1	48.66	protein_coding	2062
2.3e-06	2.34e-05	218.8	381.67	1.74438	224858_at	ZDHHC5	ENSG00000156599	zinc finger DHHC-type palmitoyltransferase 5 [Source:HGNC Symbol;Acc:HGNC:18472]	chr11	57667747	57701182	1	q12.1	45.38	protein_coding	5424
0.0059145	0.0164	8.85	13.63	1.54011	32502_at	GDPD5	ENSG00000158555	glycerophosphodiester phosphodiesterase domain containing 5 [Source:HGNC Symbol;Acc:HGNC:28804]	chr11	75434640	75525941	-1	q13.5	53.42	protein_coding	9905
0.000161	0.000814	94.81	40.75	0.429807	1563455_at	SIK3	ENSG00000160584	SIK family kinase 3 [Source:HGNC Symbol;Acc:HGNC:29165]	chr11	116843402	117098437	-1	q23.3	40.48	protein_coding	10920
3e-07	4.21e-06	964.22	466.48	0.48379	227747_at	MPZL3	ENSG00000160588	myelin protein zero like 3 [Source:HGNC Symbol;Acc:HGNC:27279]	chr11	118226690	118252365	-1	q23.3	40.95	protein_coding	3983
3.24e-05	0.000212	14.04	7.16	0.509972	1570585_at	MPZL3	ENSG00000160588	myelin protein zero like 3 [Source:HGNC Symbol;Acc:HGNC:27279]	chr11	118226690	118252365	-1	q23.3	40.95	protein_coding	3983
0.0028197	0.00885	61.93	37.21	0.60084	203292_s_at	VPS11	ENSG00000160695	VPS11 core subunit of CORVET and HOPS complexes [Source:HGNC Symbol;Acc:HGNC:14583]	chr11	119067818	119081972	1	q23.3	48.76	protein_coding	5775
0.0031535	0.00971	19.66	13.06	0.664293	219680_at	NLRX1	ENSG00000160703	NLR family member X1 [Source:HGNC Symbol;Acc:HGNC:29890]	chr11	119166568	119184016	1	q23.3	53.41	protein_coding	5320
3.3e-06	3.14e-05	95.21	31.31	0.328852	213308_at	SHANK2	ENSG00000162105	SH3 and multiple ankyrin repeat domains 2 [Source:HGNC Symbol;Acc:HGNC:14295]	chr11	70467854	71252577	-1	q13.4	51.53	protein_coding	19338
< 1e-07	< 1e-07	93.55	17.88	0.191128	243681_at	SHANK2	ENSG00000162105	SH3 and multiple ankyrin repeat domains 2 [Source:HGNC Symbol;Acc:HGNC:14295]	chr11	70467854	71252577	-1	q13.4	51.53	protein_coding	19338
< 1e-07	< 1e-07	218.86	34.05	0.155579	213307_at	SHANK2	ENSG00000162105	SH3 and multiple ankyrin repeat domains 2 [Source:HGNC Symbol;Acc:HGNC:14295]	chr11	70467854	71252577	-1	q13.4	51.53	protein_coding	19338
1.4e-06	1.54e-05	19.68	10.28	0.522358	235402_at	PPP1R32	ENSG00000162148	protein phosphatase 1 regulatory subunit 32 [Source:HGNC Symbol;Acc:HGNC:28869]	chr11	61481120	61490931	1	q12.2	57.34	protein_coding	2400
1.5e-05	0.000112	313.22	92.68	0.295894	222764_at	ASRGL1	ENSG00000162174	asparaginase and isoaspartyl peptidase 1 [Source:HGNC Symbol;Acc:HGNC:16448]	chr11	62337448	62393412	1	q12.3	44.11	protein_coding	4586
2.56e-05	0.000174	245.6	70.44	0.286808	218857_s_at	ASRGL1	ENSG00000162174	asparaginase and isoaspartyl peptidase 1 [Source:HGNC Symbol;Acc:HGNC:16448]	chr11	62337448	62393412	1	q12.3	44.11	protein_coding	4586
0.009842	0.025	29.6	45.27	1.52939	226175_at	TTC9C	ENSG00000162222	tetratricopeptide repeat domain 9C [Source:HGNC Symbol;Acc:HGNC:28432]	chr11	62728069	62740293	1	q12.3	47.12	protein_coding	2657
9.96e-05	0.000544	15.61	35.51	2.27482	204632_at	RPS6KA4	ENSG00000162302	ribosomal protein S6 kinase A4 [Source:HGNC Symbol;Acc:HGNC:10433]	chr11	64359148	64372215	1	q13.1	56.99	protein_coding	3807
0.0038428	0.0115	12.33	18.14	1.47121	209468_at	LRP5	ENSG00000162337	LDL receptor related protein 5 [Source:HGNC Symbol;Acc:HGNC:6697]	chr11	68312591	68449275	1	q13.2	54.62	protein_coding	6182
1.6e-05	0.000118	9.23	5.2	0.56338	1554071_at	DEUP1	ENSG00000165325	deuterosome assembly protein 1 [Source:HGNC Symbol;Acc:HGNC:26344]	chr11	93329971	93438487	1	q21	37.36	protein_coding	4227
7.07e-05	0.000407	14.45	5.29	0.36609	1558894_a_at	DEUP1	ENSG00000165325	deuterosome assembly protein 1 [Source:HGNC Symbol;Acc:HGNC:26344]	chr11	93329971	93438487	1	q21	37.36	protein_coding	4227
0.00168	0.00575	12.66	6.01	0.474724	1558893_a_at	DEUP1	ENSG00000165325	deuterosome assembly protein 1 [Source:HGNC Symbol;Acc:HGNC:26344]	chr11	93329971	93438487	1	q21	37.36	protein_coding	4227
< 1e-07	< 1e-07	76.31	11.85	0.155288	1554072_s_at	DEUP1	ENSG00000165325	deuterosome assembly protein 1 [Source:HGNC Symbol;Acc:HGNC:26344]	chr11	93329971	93438487	1	q21	37.36	protein_coding	4227
0.0007473	0.00294	161.03	78.28	0.486121	229256_at	PGM2L1	ENSG00000165434	phosphoglucomutase 2 like 1 [Source:HGNC Symbol;Acc:HGNC:20898]	chr11	74330316	74398433	-1	q13.4	37.45	protein_coding	8782
1.24e-05	9.51e-05	6.34	14.54	2.29338	228281_at	DDIAS	ENSG00000165490	DNA damage induced apoptosis suppressor [Source:HGNC Symbol;Acc:HGNC:26351]	chr11	82899975	82958277	1	q14.1	39.78	protein_coding	5339
0.0003736	0.00165	16.79	8.99	0.535438	63305_at	PKNOX2	ENSG00000165495	PBX/knotted 1 homeobox 2 [Source:HGNC Symbol;Acc:HGNC:16714]	chr11	125164687	125433389	1	q24.2	49.03	protein_coding	6538
0.0005645	0.00232	48.47	16.47	0.339798	222171_s_at	PKNOX2	ENSG00000165495	PBX/knotted 1 homeobox 2 [Source:HGNC Symbol;Acc:HGNC:16714]	chr11	125164687	125433389	1	q24.2	49.03	protein_coding	6538
0.0023449	0.00761	10.89	18.43	1.69238	218744_s_at	PACSIN3	ENSG00000165912	protein kinase C and casein kinase substrate in neurons 3 [Source:HGNC Symbol;Acc:HGNC:8572]	chr11	47177522	47186443	-1	p11.2	59.66	protein_coding	2755
2e-07	2.96e-06	10.39	24.82	2.38884	201267_s_at	PSMC3	ENSG00000165916	proteasome 26S subunit, ATPase 3 [Source:HGNC Symbol;Acc:HGNC:9549]	chr11	47418769	47426473	-1	p11.2	54.93	protein_coding	2276
< 1e-07	< 1e-07	103.53	7.34	0.0708973	220390_at	AGBL2	ENSG00000165923	ATP/GTP binding protein like 2 [Source:HGNC Symbol;Acc:HGNC:26296]	chr11	47659591	47715389	-1	p11.2	44.9	protein_coding	5483
1.1e-06	1.27e-05	107.49	41.09	0.382268	219806_s_at	SMCO4	ENSG00000166002	single-pass membrane protein with coiled-coil domains 4 [Source:HGNC Symbol;Acc:HGNC:24810]	chr11	93478472	93543391	-1	q21	45.14	protein_coding	1106
0.0002637	0.00123	31.91	63.69	1.99593	1569302_at	CEP295	ENSG00000166004	centrosomal protein 295 [Source:HGNC Symbol;Acc:HGNC:29366]	chr11	93661682	93730358	1	q21	38.56	protein_coding	9452
0.0008239	0.00319	487.43	240	0.492378	225450_at	AMOTL1	ENSG00000166025	angiomotin like 1 [Source:HGNC Symbol;Acc:HGNC:17811]	chr11	94706431	94876748	1	q21	41.79	protein_coding	10030
0.0041909	0.0123	14.04	9.01	0.641738	235277_at	AMOTL1	ENSG00000166025	angiomotin like 1 [Source:HGNC Symbol;Acc:HGNC:17811]	chr11	94706431	94876748	1	q21	41.79	protein_coding	10030
0.0007488	0.00294	8.41	15.11	1.79667	214959_s_at	API5	ENSG00000166181	apoptosis inhibitor 5 [Source:HGNC Symbol;Acc:HGNC:594]	chr11	43311963	43344529	1	p12	37.75	protein_coding	4651
0.005559	0.0156	14.47	10.55	0.729095	1556319_at	TRIM44	ENSG00000166326	tripartite motif containing 44 [Source:HGNC Symbol;Acc:HGNC:19016]	chr11	35662775	35818007	1	p13	39.96	protein_coding	13107
0.0001531	0.00078	8.39	20.9	2.49106	206591_at	RAG1	ENSG00000166349	recombination activating 1 [Source:HGNC Symbol;Acc:HGNC:9831]	chr11	36510709	36593156	1	p12	39.11	protein_coding	7839
1.3e-05	9.89e-05	83.09	36.99	0.44518	228249_at	IFTAP	ENSG00000166352	intraflagellar transport associated protein [Source:HGNC Symbol;Acc:HGNC:25142]	chr11	36594369	36675695	1	p12	37.62	protein_coding	10386
< 1e-07	< 1e-07	274.13	63.13	0.230292	228882_at	TUB	ENSG00000166402	TUB bipartite transcription factor [Source:HGNC Symbol;Acc:HGNC:12406]	chr11	8019244	8106243	1	p15.4	49.4	protein_coding	7004
6.3e-06	5.34e-05	22.75	9.71	0.426813	220282_at	RIC3	ENSG00000166405	RIC3 acetylcholine receptor chaperone [Source:HGNC Symbol;Acc:HGNC:30338]	chr11	8106056	8169055	-1	p15.4	39.92	protein_coding	7694
< 1e-07	< 1e-07	1424.09	560.55	0.39362	202440_s_at	DENND2B	ENSG00000166444	DENN domain containing 2B [Source:HGNC Symbol;Acc:HGNC:11350]	chr11	8693351	8910951	-1	p15.4	45.03	protein_coding	14262
7.62e-05	0.000432	1895.4	1149.98	0.606722	212622_at	TMEM41B	ENSG00000166471	transmembrane protein 41B [Source:HGNC Symbol;Acc:HGNC:28948]	chr11	9280654	9314636	-1	p15.4	42.34	protein_coding	4278
2.85e-05	0.00019	5.56	22.22	3.9964	216615_s_at	HTR3A	ENSG00000166736	5-hydroxytryptamine receptor 3A [Source:HGNC Symbol;Acc:HGNC:5297]	chr11	113975075	113990313	1	q23.2	50.57	protein_coding	2578
1.2e-06	1.36e-05	12.72	58.36	4.58805	231559_at	NNMT	ENSG00000166741	nicotinamide N-methyltransferase [Source:HGNC Symbol;Acc:HGNC:7861]	chr11	114257787	114313536	1	q23.2	43.32	protein_coding	2596
7.47e-05	0.000425	35.45	154.29	4.35233	202238_s_at	NNMT	ENSG00000166741	nicotinamide N-methyltransferase [Source:HGNC Symbol;Acc:HGNC:7861]	chr11	114257787	114313536	1	q23.2	43.32	protein_coding	2596
0.0003997	0.00175	50.81	297.2	5.84924	202237_at	NNMT	ENSG00000166741	nicotinamide N-methyltransferase [Source:HGNC Symbol;Acc:HGNC:7861]	chr11	114257787	114313536	1	q23.2	43.32	protein_coding	2596
0.0014467	0.00508	23.62	42.31	1.79128	225614_at	SAAL1	ENSG00000166788	serum amyloid A like 1 [Source:HGNC Symbol;Acc:HGNC:25158]	chr11	18069935	18106087	-1	p15.1	39.76	protein_coding	3066
0.0011571	0.00421	7.59	15.58	2.0527	207022_s_at	LDHC	ENSG00000166796	lactate dehydrogenase C [Source:HGNC Symbol;Acc:HGNC:6544]	chr11	18412318	18452063	1	p15.1	41.13	protein_coding	2089
2e-07	2.96e-06	13.65	47.44	3.47546	225468_at	PATL1	ENSG00000166889	PAT1 homolog 1, processing body mRNA decay factor [Source:HGNC Symbol;Acc:HGNC:26721]	chr11	59636716	59669037	-1	q12.1	39.89	protein_coding	4335
3.31e-05	0.000215	45.79	96.28	2.10264	225466_at	PATL1	ENSG00000166889	PAT1 homolog 1, processing body mRNA decay factor [Source:HGNC Symbol;Acc:HGNC:26721]	chr11	59636716	59669037	-1	q12.1	39.89	protein_coding	4335
0.0032845	0.0101	75.51	119.73	1.58562	209238_at	STX3	ENSG00000166900	syntaxin 3 [Source:HGNC Symbol;Acc:HGNC:11438]	chr11	59713456	59805882	1	q12.1	43.39	protein_coding	7308
< 1e-07	< 1e-07	227.07	5.36	0.0236051	224355_s_at	MS4A8	ENSG00000166959	membrane spanning 4-domains A8 [Source:HGNC Symbol;Acc:HGNC:13380]	chr11	60699585	60715807	1	q12.2	45.71	protein_coding	2568
8.34e-05	0.000465	401.24	681.29	1.69796	207573_x_at	ATP5MG	ENSG00000167283	ATP synthase membrane subunit g [Source:HGNC Symbol;Acc:HGNC:14247]	chr11	118401606	118431496	1	q23.3	42.71	protein_coding	2926
0.0002435	0.00115	420.97	697.41	1.65667	210453_x_at	ATP5MG	ENSG00000167283	ATP synthase membrane subunit g [Source:HGNC Symbol;Acc:HGNC:14247]	chr11	118401606	118431496	1	q23.3	42.71	protein_coding	2926
0.0005725	0.00235	421.56	694.61	1.64771	208746_x_at	ATP5MG	ENSG00000167283	ATP synthase membrane subunit g [Source:HGNC Symbol;Acc:HGNC:14247]	chr11	118401606	118431496	1	q23.3	42.71	protein_coding	2926
4.5e-06	4.05e-05	91.23	43.28	0.474405	202764_at	STIM1	ENSG00000167323	stromal interaction molecule 1 [Source:HGNC Symbol;Acc:HGNC:11386]	chr11	3854527	4093210	1	p15.4	42.52	protein_coding	7168
< 1e-07	< 1e-07	27.34	7.43	0.271763	1557477_at	STIM1	ENSG00000167323	stromal interaction molecule 1 [Source:HGNC Symbol;Acc:HGNC:11386]	chr11	3854527	4093210	1	p15.4	42.52	protein_coding	7168
< 1e-07	1.6e-06	125.69	265.56	2.11282	201477_s_at	RRM1	ENSG00000167325	ribonucleotide reductase catalytic subunit M1 [Source:HGNC Symbol;Acc:HGNC:10451]	chr11	4094707	4138932	1	p15.4	40.37	protein_coding	4233
0.0011464	0.00418	35.9	4.4	0.122563	220541_at	MMP26	ENSG00000167346	matrix metallopeptidase 26 [Source:HGNC Symbol;Acc:HGNC:14249]	chr11	4704784	4992429	1	p15.4	37.28	protein_coding	1451
0.0007552	0.00296	30.73	54.73	1.781	201245_s_at	OTUB1	ENSG00000167770	OTU deubiquitinase, ubiquitin aldehyde binding 1 [Source:HGNC Symbol;Acc:HGNC:23077]	chr11	63985853	64001811	1	q13.1	59.12	protein_coding	5336
6e-06	5.13e-05	144.15	247.75	1.7187	208714_at	NDUFV1	ENSG00000167792	NADH:ubiquinone oxidoreductase core subunit V1 [Source:HGNC Symbol;Acc:HGNC:7716]	chr11	67605653	67612554	1	q13.2	56.2	protein_coding	5057
0.0029485	0.00919	59.04	80.33	1.3606	223048_at	SDHAF2	ENSG00000167985	succinate dehydrogenase complex assembly factor 2 [Source:HGNC Symbol;Acc:HGNC:26034]	chr11	61430042	61446733	1	q12.2	45.26	protein_coding	1696
3.8e-06	3.53e-05	2598.51	4564.42	1.75655	200748_s_at	FTH1	ENSG00000167996	ferritin heavy chain 1 [Source:HGNC Symbol;Acc:HGNC:3976]	chr11	61959718	61967634	-1	q12.3	50.4	protein_coding	2004
4.81e-05	0.000293	590.93	972.59	1.64586	202306_at	POLR2G	ENSG00000168002	RNA polymerase II subunit G [Source:HGNC Symbol;Acc:HGNC:9194]	chr11	62761565	62766710	1	q12.3	50.52	protein_coding	1902
1.1e-06	1.27e-05	26.09	47.43	1.81794	200924_s_at	SLC3A2	ENSG00000168003	solute carrier family 3 member 2 [Source:HGNC Symbol;Acc:HGNC:11026]	chr11	62856004	62888880	1	q12.3	48.31	protein_coding	6392
2e-07	2.96e-06	34.74	60.58	1.74381	202535_at	FADD	ENSG00000168040	Fas associated via death domain [Source:HGNC Symbol;Acc:HGNC:3573]	chr11	70203296	70207390	1	q13.3	54.53	protein_coding	1708
4e-07	5.38e-06	19.85	84.43	4.2534	205449_at	SAC3D1	ENSG00000168061	SAC3 domain containing 1 [Source:HGNC Symbol;Acc:HGNC:30179]	chr11	65040901	65044828	1	q13.1	58.58	protein_coding	1772
1.22e-05	9.38e-05	7.9	17.52	2.21772	228439_at	BATF2	ENSG00000168062	basic leucine zipper ATF-like transcription factor 2 [Source:HGNC Symbol;Acc:HGNC:25163]	chr11	64987945	64997018	-1	q13.1	53.1	protein_coding	2815
0.0015727	0.00544	269.12	101.83	0.378381	210172_at	SF1	ENSG00000168066	splicing factor 1 [Source:HGNC Symbol;Acc:HGNC:12950]	chr11	64764606	64778786	-1	q13.1	49.33	protein_coding	5972
0.0014728	0.00516	6.12	8.89	1.45261	204936_at	MAP4K2	ENSG00000168067	mitogen-activated protein kinase kinase kinase kinase 2 [Source:HGNC Symbol;Acc:HGNC:6864]	chr11	64784918	64803241	-1	q13.1	56.72	protein_coding	7645
< 1e-07	< 1e-07	52.32	376.73	7.2005	204767_s_at	FEN1	ENSG00000168496	flap structure-specific endonuclease 1 [Source:HGNC Symbol;Acc:HGNC:3650]	chr11	61792911	61797238	1	q12.2	48.87	protein_coding	2198
< 1e-07	< 1e-07	7.37	24.01	3.2578	204768_s_at	FEN1	ENSG00000168496	flap structure-specific endonuclease 1 [Source:HGNC Symbol;Acc:HGNC:3650]	chr11	61792911	61797238	1	q12.2	48.87	protein_coding	2198
9.7e-06	7.72e-05	75.22	171.26	2.27679	220934_s_at	TMEM223	ENSG00000168569	transmembrane protein 223 [Source:HGNC Symbol;Acc:HGNC:28464]	chr11	62771629	62792006	-1	q12.3	52.08	protein_coding	2265
1.15e-05	8.92e-05	27.45	8.02	0.292168	227238_at	MUC15	ENSG00000169550	mucin 15, cell surface associated [Source:HGNC Symbol;Acc:HGNC:14956]	chr11	26559032	26572263	-1	p14.2	33.2	protein_coding	3587
0.0019815	0.0066	45.47	23.65	0.520123	223119_s_at	USP47	ENSG00000170242	ubiquitin specific peptidase 47 [Source:HGNC Symbol;Acc:HGNC:20076]	chr11	11841423	11961887	1	p15.3	35.56	protein_coding	13722
< 1e-07	< 1e-07	185.81	9.44	0.0508046	232603_at	DCDC1	ENSG00000170959	doublecortin domain containing 1 [Source:HGNC Symbol;Acc:HGNC:20625]	chr11	30830369	31369810	-1	p13	36.55	protein_coding	13160
1.49e-05	0.000111	45.8	95.72	2.08996	52164_at	C11orf24	ENSG00000171067	chromosome 11 open reading frame 24 [Source:HGNC Symbol;Acc:HGNC:1174]	chr11	68261338	68272001	-1	q13.2	52.05	protein_coding	3403
4.19e-05	0.000261	16.48	28.65	1.73847	218299_at	C11orf24	ENSG00000171067	chromosome 11 open reading frame 24 [Source:HGNC Symbol;Acc:HGNC:1174]	chr11	68261338	68272001	-1	q13.2	52.05	protein_coding	3403
< 1e-07	1.6e-06	30.05	9.89	0.329118	228448_at	MAP6	ENSG00000171533	microtubule associated protein 6 [Source:HGNC Symbol;Acc:HGNC:6868]	chr11	75586918	75669038	-1	q13.5	44.54	protein_coding	6351
< 1e-07	1.6e-06	116.78	21.25	0.181966	235672_at	MAP6	ENSG00000171533	microtubule associated protein 6 [Source:HGNC Symbol;Acc:HGNC:6868]	chr11	75586918	75669038	-1	q13.5	44.54	protein_coding	6351
< 1e-07	< 1e-07	158.18	16.07	0.101593	228943_at	MAP6	ENSG00000171533	microtubule associated protein 6 [Source:HGNC Symbol;Acc:HGNC:6868]	chr11	75586918	75669038	-1	q13.5	44.54	protein_coding	6351
4.6e-06	4.13e-05	64.38	14.58	0.226468	229313_at	ANO5	ENSG00000171714	anoctamin 5 [Source:HGNC Symbol;Acc:HGNC:27337]	chr11	21782659	22283567	1	p15.1	36.43	protein_coding	19477
0.0002328	0.00111	130.3	76.46	0.5868	204757_s_at	C2CD2L	ENSG00000172375	C2CD2 like [Source:HGNC Symbol;Acc:HGNC:29000]	chr11	119102198	119118544	1	q23.3	52.4	protein_coding	9216
5e-06	4.41e-05	28.98	70.22	2.42305	204370_at	CLP1	ENSG00000172409	cleavage factor polyribonucleotide kinase subunit 1 [Source:HGNC Symbol;Acc:HGNC:16999]	chr11	57648188	57661865	1	q12.1	47.82	protein_coding	2189
0.0032169	0.00988	41.92	65.19	1.5551	202041_s_at	FIBP	ENSG00000172500	FGF1 intracellular binding protein [Source:HGNC Symbol;Acc:HGNC:3705]	chr11	65883740	65888531	-1	q13.1	55.13	protein_coding	3346
1.1e-06	1.27e-05	191.54	321.27	1.6773	200846_s_at	PPP1CA	ENSG00000172531	protein phosphatase 1 catalytic subunit alpha [Source:HGNC Symbol;Acc:HGNC:9281]	chr11	67398181	67421183	-1	q13.2	61.16	protein_coding	4073
0.007955	0.0209	40.19	89.96	2.23837	206580_s_at	EFEMP2	ENSG00000172638	EGF containing fibulin extracellular matrix protein 2 [Source:HGNC Symbol;Acc:HGNC:3219]	chr11	65866441	65873592	-1	q13.1	60.57	protein_coding	5397
< 1e-07	< 1e-07	28.7	99.82	3.47805	1555730_a_at	CFL1	ENSG00000172757	cofilin 1 [Source:HGNC Symbol;Acc:HGNC:1874]	chr11	65823022	65862026	-1	q13.1	50.18	protein_coding	5865
0.0001575	0.000799	7.35	11.19	1.52245	229396_at	OVOL1	ENSG00000172818	ovo like transcriptional repressor 1 [Source:HGNC Symbol;Acc:HGNC:8525]	chr11	65787063	65797214	1	q13.1	60.15	protein_coding	3803
8.85e-05	0.00049	17.82	35.55	1.99495	201791_s_at	DHCR7	ENSG00000172893	7-dehydrocholesterol reductase [Source:HGNC Symbol;Acc:HGNC:2860]	chr11	71428193	71452868	-1	q13.4	51.71	protein_coding	6852
0.0003347	0.00151	39.05	75.9	1.94366	226453_at	RNASEH2C	ENSG00000172922	ribonuclease H2 subunit C [Source:HGNC Symbol;Acc:HGNC:24116]	chr11	65714005	65720818	-1	q13.1	55.55	protein_coding	4972
0.0019142	0.00641	1071.99	1552	1.44777	217774_s_at	TRMT112	ENSG00000173113	tRNA methyltransferase subunit 11-2 [Source:HGNC Symbol;Acc:HGNC:26940]	chr11	64316460	64317559	-1	q13.1	57.73	protein_coding	1100
4e-07	5.38e-06	463.05	775.09	1.67388	208989_s_at	KDM2A	ENSG00000173120	lysine demethylase 2A [Source:HGNC Symbol;Acc:HGNC:13606]	chr11	67119263	67258082	1	q13.2	42.99	protein_coding	10381
0.0014798	0.00518	66.84	96.28	1.44045	1487_at	ESRRA	ENSG00000173153	estrogen related receptor alpha [Source:HGNC Symbol;Acc:HGNC:3471]	chr11	64305497	64316743	1	q13.1	57.13	protein_coding	3101
2.6e-06	2.58e-05	6.86	10.6	1.54519	209885_at	RHOD	ENSG00000173156	ras homolog family member D [Source:HGNC Symbol;Acc:HGNC:670]	chr11	67056847	67072017	1	q13.2	55.57	protein_coding	1240
< 1e-07	< 1e-07	18.41	45.96	2.49647	212680_x_at	PPP1R14B	ENSG00000173457	protein phosphatase 1 regulatory inhibitor subunit 14B [Source:HGNC Symbol;Acc:HGNC:9057]	chr11	64244479	64246943	-1	q13.1	65.52	protein_coding	1658
0.0003541	0.00158	24.11	37.68	1.56284	219491_at	LRFN4	ENSG00000173621	leucine rich repeat and fibronectin type III domain containing 4 [Source:HGNC Symbol;Acc:HGNC:28456]	chr11	66856647	66860475	1	q13.2	70.38	protein_coding	3087
0.0004848	0.00205	18.53	31.07	1.67674	205333_s_at	RCE1	ENSG00000173653	Ras converting CAAX endopeptidase 1 [Source:HGNC Symbol;Acc:HGNC:13721]	chr11	66842835	66846552	1	q13.2	60.49	protein_coding	3001
7.7e-05	0.000436	285.82	202.87	0.709782	209497_s_at	RBM4B	ENSG00000173914	RNA binding motif protein 4B [Source:HGNC Symbol;Acc:HGNC:28842]	chr11	66664998	66677887	-1	q13.2	43.82	protein_coding	4291
5.4e-06	4.69e-05	88.42	160.21	1.81192	200997_at	RBM4	ENSG00000173933	RNA binding motif protein 4 [Source:HGNC Symbol;Acc:HGNC:9901]	chr11	66638667	66668374	1	q13.2	44.81	protein_coding	6538
0.0005693	0.00234	17.99	29.95	1.66481	203522_at	CCS	ENSG00000173992	copper chaperone for superoxide dismutase [Source:HGNC Symbol;Acc:HGNC:1613]	chr11	66593153	66606019	1	q13.2	51.29	protein_coding	2142
0.0016719	0.00573	17.53	27.39	1.56246	203657_s_at	CTSF	ENSG00000174080	cathepsin F [Source:HGNC Symbol;Acc:HGNC:2531]	chr11	66563464	66568879	-1	q13.2	58.71	protein_coding	4249
< 1e-07	1.6e-06	123.7	63	0.509297	218471_s_at	BBS1	ENSG00000174483	Bardet-Biedl syndrome 1 [Source:HGNC Symbol;Acc:HGNC:966]	chr11	66510606	66533613	1	q13.2	49.92	protein_coding	6131
0.009165	0.0235	17.6	30.4	1.72727	235431_s_at	PELI3	ENSG00000174516	pellino E3 ubiquitin protein ligase family member 3 [Source:HGNC Symbol;Acc:HGNC:30010]	chr11	66466327	66477337	1	q13.2	56.57	protein_coding	3926
3.07e-05	0.000202	88.12	199.89	2.26838	219162_s_at	MRPL11	ENSG00000174547	mitochondrial ribosomal protein L11 [Source:HGNC Symbol;Acc:HGNC:14042]	chr11	66435075	66466738	-1	q13.2	48.04	protein_coding	2539
7e-06	5.83e-05	16.83	28.96	1.72074	204717_s_at	SLC29A2	ENSG00000174669	solute carrier family 29 member 2 [Source:HGNC Symbol;Acc:HGNC:11004]	chr11	66362521	66372214	-1	q13.2	58.27	protein_coding	2720
0.0003302	0.00149	32.09	50.98	1.58866	215631_s_at	BRMS1	ENSG00000174744	BRMS1 transcriptional repressor and anoikis regulator [Source:HGNC Symbol;Acc:HGNC:17262]	chr11	66337333	66345125	-1	q13.2	55.88	protein_coding	2514
0.00248	0.00797	83.44	171.35	2.05357	218665_at	FZD4	ENSG00000174804	frizzled class receptor 4 [Source:HGNC Symbol;Acc:HGNC:4042]	chr11	86945679	86955395	-1	q14.2	45.44	protein_coding	7387
0.0070778	0.019	23.11	50.81	2.19862	224337_s_at	FZD4	ENSG00000174804	frizzled class receptor 4 [Source:HGNC Symbol;Acc:HGNC:4042]	chr11	86945679	86955395	-1	q14.2	45.44	protein_coding	7387
0.0029639	0.00923	61.08	93.71	1.53422	202418_at	YIF1A	ENSG00000174851	Yip1 interacting factor homolog A, membrane trafficking protein [Source:HGNC Symbol;Acc:HGNC:16688]	chr11	66284580	66289145	-1	q13.2	58.83	protein_coding	2345
1.42e-05	0.000107	79.92	147.03	1.83971	212832_s_at	CKAP5	ENSG00000175216	cytoskeleton associated protein 5 [Source:HGNC Symbol;Acc:HGNC:28959]	chr11	46743048	46846308	-1	p11.2	40.42	protein_coding	8538
0.0001445	0.000743	25.92	55.65	2.14699	1555278_a_at	CKAP5	ENSG00000175216	cytoskeleton associated protein 5 [Source:HGNC Symbol;Acc:HGNC:28959]	chr11	46743048	46846308	-1	p11.2	40.42	protein_coding	8538
0.0001719	0.000862	9.12	14.3	1.56798	209021_x_at	ATG13	ENSG00000175224	autophagy related 13 [Source:HGNC Symbol;Acc:HGNC:29091]	chr11	46617527	46674818	1	p11.2	44.43	protein_coding	7001
0.0002077	0.00101	56.22	13.75	0.244575	242124_at	CHST1	ENSG00000175264	carbohydrate sulfotransferase 1 [Source:HGNC Symbol;Acc:HGNC:1969]	chr11	45647689	45665622	-1	p11.2	56.44	protein_coding	4666
0.0059119	0.0164	78.08	23.98	0.307121	205567_at	CHST1	ENSG00000175264	carbohydrate sulfotransferase 1 [Source:HGNC Symbol;Acc:HGNC:1969]	chr11	45647689	45665622	-1	p11.2	56.44	protein_coding	4666
3.1e-06	2.99e-05	78	13.11	0.168077	219197_s_at	SCUBE2	ENSG00000175356	signal peptide, CUB domain and EGF like domain containing 2 [Source:HGNC Symbol;Acc:HGNC:30425]	chr11	9019476	9138114	-1	p15.4	44.09	protein_coding	8014
0.0053178	0.015	8.98	13.42	1.49443	223682_s_at	EIF1AD	ENSG00000175376	eukaryotic translation initiation factor 1A domain containing [Source:HGNC Symbol;Acc:HGNC:28147]	chr11	65996545	66002176	-1	q13.1	48.54	protein_coding	3327
0.0004397	0.00189	14.6	8.64	0.591781	230479_at	EIF3F	ENSG00000175390	eukaryotic translation initiation factor 3 subunit F [Source:HGNC Symbol;Acc:HGNC:3275]	chr11	7970251	8001862	1	p15.4	41.38	protein_coding	15136
9.89e-05	0.000541	24.25	42.31	1.74474	200051_at	SART1	ENSG00000175467	spliceosome associated factor 1, recruiter of U4/U6.U5 tri-snRNP [Source:HGNC Symbol;Acc:HGNC:10538]	chr11	65961728	65980137	1	q13.1	55.2	protein_coding	4593
0.0027162	0.00859	15.67	23.15	1.47735	202996_at	POLD4	ENSG00000175482	DNA polymerase delta 4, accessory subunit [Source:HGNC Symbol;Acc:HGNC:14106]	chr11	67350772	67356972	-1	q13.2	58.04	protein_coding	3054
0.0001054	0.000572	16.77	56.06	3.34287	227647_at	KCNE3	ENSG00000175538	potassium voltage-gated channel subfamily E regulatory subunit 3 [Source:HGNC Symbol;Acc:HGNC:6243]	chr11	74454841	74467729	-1	q13.4	48.41	protein_coding	3599
1e-07	1.6e-06	33.82	97.29	2.8767	203258_at	DRAP1	ENSG00000175550	DR1 associated protein 1 [Source:HGNC Symbol;Acc:HGNC:3019]	chr11	65919274	65921563	1	q13.1	65.33	protein_coding	1722
0.0035016	0.0106	3644.37	2233.7	0.612918	208998_at	UCP2	ENSG00000175567	uncoupling protein 2 [Source:HGNC Symbol;Acc:HGNC:12518]	chr11	73974672	73982843	-1	q13.4	52.37	protein_coding	2768
0.0002567	0.0012	16.91	25.73	1.52158	204610_s_at	CCDC85B	ENSG00000175602	coiled-coil domain containing 85B [Source:HGNC Symbol;Acc:HGNC:24926]	chr11	65890673	65891635	1	q13.1	71.65	protein_coding	963
2.7e-06	2.66e-05	16.21	27.36	1.68785	203777_s_at	RPS6KB2	ENSG00000175634	ribosomal protein S6 kinase B2 [Source:HGNC Symbol;Acc:HGNC:10437]	chr11	67428460	67435401	1	q13.2	58.79	protein_coding	5815
< 1e-07	< 1e-07	65.67	9.05	0.13781	220344_at	C11orf16	ENSG00000176029	chromosome 11 open reading frame 16 [Source:HGNC Symbol;Acc:HGNC:1169]	chr11	8920076	8933006	-1	p15.4	49.88	protein_coding	2607
0.000665	0.00267	492.57	923.52	1.8749	229666_s_at	CSTF3	ENSG00000176102	cleavage stimulation factor subunit 3 [Source:HGNC Symbol;Acc:HGNC:2485]	chr11	33077188	33162371	-1	p13	37.22	protein_coding	4513
0.0030824	0.00953	254.25	368.19	1.44814	229665_at	CSTF3	ENSG00000176102	cleavage stimulation factor subunit 3 [Source:HGNC Symbol;Acc:HGNC:2485]	chr11	33077188	33162371	-1	p13	37.22	protein_coding	4513
0.0042412	0.0124	102.92	51.59	0.501263	235110_at	PLAAT3	ENSG00000176485	phospholipase A and acyltransferase 3 [Source:HGNC Symbol;Acc:HGNC:17825]	chr11	63573195	63616883	-1	q13.1	45.84	protein_coding	3080
0.0012284	0.00443	35.81	147.91	4.13041	226769_at	FIBIN	ENSG00000176971	fin bud initiation factor homolog [Source:HGNC Symbol;Acc:HGNC:33747]	chr11	26994112	26997087	1	p14.2	44.76	protein_coding	2976
8.19e-05	0.000458	16.32	24.42	1.49632	32209_at	FAM89B	ENSG00000176973	family with sequence similarity 89 member B [Source:HGNC Symbol;Acc:HGNC:16708]	chr11	65572349	65574198	1	q13.1	64.22	protein_coding	1458
0.005578	0.0156	10.31	14.3	1.387	212484_at	FAM89B	ENSG00000176973	family with sequence similarity 89 member B [Source:HGNC Symbol;Acc:HGNC:16708]	chr11	65572349	65574198	1	q13.1	64.22	protein_coding	1458
1.71e-05	0.000125	83.56	50.31	0.602082	221951_at	TMEM80	ENSG00000177042	transmembrane protein 80 [Source:HGNC Symbol;Acc:HGNC:27453]	chr11	695591	705028	1	p15.5	55.67	protein_coding	3908
5.15e-05	0.00031	30.96	18.67	0.603036	65630_at	TMEM80	ENSG00000177042	transmembrane protein 80 [Source:HGNC Symbol;Acc:HGNC:27453]	chr11	695591	705028	1	p15.5	55.67	protein_coding	3908
0.0093808	0.0239	11.91	8.23	0.691016	232059_at	DSCAML1	ENSG00000177103	DS cell adhesion molecule like 1 [Source:HGNC Symbol;Acc:HGNC:14656]	chr11	117427772	117817525	-1	q23.3	50.07	protein_coding	7036
0.0018819	0.00633	10.86	17.17	1.58103	203175_at	RHOG	ENSG00000177105	ras homolog family member G [Source:HGNC Symbol;Acc:HGNC:672]	chr11	3826978	3840959	-1	p15.4	51.19	protein_coding	1758
0.0037031	0.0111	33.05	54.8	1.65809	227429_at	CRACR2B	ENSG00000177685	calcium release activated channel regulator 2B [Source:HGNC Symbol;Acc:HGNC:28703]	chr11	826144	831991	1	p15.5	66.16	protein_coding	4224
1.19e-05	9.18e-05	114.55	232.94	2.03352	211730_s_at	POLR2L	ENSG00000177700	RNA polymerase II, I and III subunit L [Source:HGNC Symbol;Acc:HGNC:9199]	chr11	837356	842529	-1	p15.5	61.02	protein_coding	1126
3.4e-06	3.22e-05	68.15	14.49	0.212619	1553228_at	CCDC89	ENSG00000179071	coiled-coil domain containing 89 [Source:HGNC Symbol;Acc:HGNC:26762]	chr11	85683848	85686195	-1	q14.1	42.25	protein_coding	2348
< 1e-07	< 1e-07	251.35	828.42	3.29588	234985_at	LDLRAD3	ENSG00000179241	low density lipoprotein receptor class A domain containing 3 [Source:HGNC Symbol;Acc:HGNC:27046]	chr11	35943981	36232136	1	p13	44.12	protein_coding	4575
0.0018063	0.00612	6.17	11.89	1.92707	209803_s_at	PHLDA2	ENSG00000181649	pleckstrin homology like domain family A member 2 [Source:HGNC Symbol;Acc:HGNC:12385]	chr11	2928273	2929420	-1	p15.4	64.81	protein_coding	920
1e-06	1.17e-05	113.79	224.09	1.96933	220647_s_at	COA4	ENSG00000181924	cytochrome c oxidase assembly factor 4 homolog [Source:HGNC Symbol;Acc:HGNC:24604]	chr11	73872667	73876901	-1	q13.4	46.64	protein_coding	2159
5.84e-05	0.000345	17.89	7.28	0.406931	231430_at	FAM181B	ENSG00000182103	family with sequence similarity 181 member B [Source:HGNC Symbol;Acc:HGNC:28512]	chr11	82729940	82733864	-1	q14.1	54.75	protein_coding	3925
1.59e-05	0.000117	8.02	35.95	4.48254	227566_at	NTM	ENSG00000182667	neurotrimin [Source:HGNC Symbol;Acc:HGNC:17941]	chr11	131370478	132336822	1	q25	43.25	protein_coding	6956
3.09e-05	0.000203	121.04	39.03	0.322455	244345_at	CADM1	ENSG00000182985	cell adhesion molecule 1 [Source:HGNC Symbol;Acc:HGNC:5951]	chr11	115169218	115504957	-1	q23.3	38.54	protein_coding	10975
0.0003249	0.00147	401.35	184.39	0.459424	209032_s_at	CADM1	ENSG00000182985	cell adhesion molecule 1 [Source:HGNC Symbol;Acc:HGNC:5951]	chr11	115169218	115504957	-1	q23.3	38.54	protein_coding	10975
< 1e-07	< 1e-07	116.84	5.96	0.0510099	1568606_at	HOATZ	ENSG00000183644	HOATZ cilia and flagella associated protein [Source:HGNC Symbol;Acc:HGNC:25061]	chr11	111514778	111537043	1	q23.1	36.93	protein_coding	3299
0.000252	0.00119	6.4	13.78	2.15312	229215_at	ASCL2	ENSG00000183734	achaete-scute family bHLH transcription factor 2 [Source:HGNC Symbol;Acc:HGNC:739]	chr11	2268498	2270588	-1	p15.5	69.92	protein_coding	1485
0.0015144	0.00528	376.99	253.19	0.671609	212561_at	DENND5A	ENSG00000184014	DENN domain containing 5A [Source:HGNC Symbol;Acc:HGNC:19344]	chr11	9138825	9265959	-1	p15.4	43.1	protein_coding	21072
3e-07	4.21e-06	45.34	15.16	0.334363	226717_at	LRTOMT	ENSG00000184154	leucine rich transmembrane and O-methyltransferase domain containing [Source:HGNC Symbol;Acc:HGNC:25033]	chr11	72080337	72096895	1	q13.4	45.88	protein_coding	3541
0.0068704	0.0186	69.23	47.37	0.684241	206374_at	DUSP8	ENSG00000184545	dual specificity phosphatase 8 [Source:HGNC Symbol;Acc:HGNC:3074]	chr11	1554051	1572271	-1	p15.5	64.56	protein_coding	4960
< 1e-07	1.6e-06	424.44	901.02	2.12284	224893_at	ATL3	ENSG00000184743	atlastin GTPase 3 [Source:HGNC Symbol;Acc:HGNC:24526]	chr11	63624087	63671921	-1	q13.1	42.43	protein_coding	7600
< 1e-07	< 1e-07	9.82	34.32	3.49491	223452_s_at	ATL3	ENSG00000184743	atlastin GTPase 3 [Source:HGNC Symbol;Acc:HGNC:24526]	chr11	63624087	63671921	-1	q13.1	42.43	protein_coding	7600
6.2e-06	5.27e-05	313.36	148.71	0.474566	218921_at	SIGIRR	ENSG00000185187	single Ig and TIR domain containing [Source:HGNC Symbol;Acc:HGNC:30575]	chr11	405716	417455	-1	p15.5	65.22	protein_coding	3496
9.1e-06	7.3e-05	343.19	164.94	0.480608	52940_at	SIGIRR	ENSG00000185187	single Ig and TIR domain containing [Source:HGNC Symbol;Acc:HGNC:30575]	chr11	405716	417455	-1	p15.5	65.22	protein_coding	3496
0.0060467	0.0167	13.49	21.13	1.56635	208436_s_at	IRF7	ENSG00000185507	interferon regulatory factor 7 [Source:HGNC Symbol;Acc:HGNC:6122]	chr11	612553	615983	-1	p15.5	67.06	protein_coding	2612
0.00604	0.0167	92.77	148.1	1.59642	227109_at	CYP2R1	ENSG00000186104	cytochrome P450 family 2 subfamily R member 1 [Source:HGNC Symbol;Acc:HGNC:20580]	chr11	14877440	14892231	-1	p15.2	39.83	protein_coding	4495
0.0065279	0.0178	255.76	167.85	0.656279	227208_at	CENATAC	ENSG00000186166	centrosomal AT-AC splicing factor [Source:HGNC Symbol;Acc:HGNC:30460]	chr11	118998138	119015793	1	q23.3	45.88	protein_coding	5111
< 1e-07	< 1e-07	86.56	16.6	0.191774	1565149_at	DYNC2H1	ENSG00000187240	dynein cytoplasmic 2 heavy chain 1 [Source:HGNC Symbol;Acc:HGNC:2962]	chr11	103109410	103479863	1	q22.3	35.1	protein_coding	15012
< 1e-07	< 1e-07	238.65	42.66	0.178755	219469_at	DYNC2H1	ENSG00000187240	dynein cytoplasmic 2 heavy chain 1 [Source:HGNC Symbol;Acc:HGNC:2962]	chr11	103109410	103479863	1	q22.3	35.1	protein_coding	15012
0.0001032	0.000561	1778.8	326.24	0.183405	227099_s_at	C11orf96	ENSG00000187479	chromosome 11 open reading frame 96 [Source:HGNC Symbol;Acc:HGNC:38675]	chr11	43925342	43943878	1	p11.2	53.15	protein_coding	1913
< 1e-07	< 1e-07	113.48	20.12	0.1773	230936_at	DNAJB13	ENSG00000187726	DnaJ heat shock protein family (Hsp40) member B13 [Source:HGNC Symbol;Acc:HGNC:30718]	chr11	73951026	73970366	1	q13.4	50.7	protein_coding	2767
0.0069322	0.0187	481.58	704.56	1.46302	218641_at	C11orf95	ENSG00000188070	chromosome 11 open reading frame 95 [Source:HGNC Symbol;Acc:HGNC:28449]	chr11	63759892	63768775	-1	q13.1	61.54	protein_coding	5948
6.53e-05	0.000381	117.86	28.11	0.238503	229715_at	NCR3LG1	ENSG00000188211	natural killer cell cytotoxicity receptor 3 ligand 1 [Source:HGNC Symbol;Acc:HGNC:42400]	chr11	17351800	17377341	1	p15.1	44.44	protein_coding	6364
1.33e-05	0.000101	9.16	16.97	1.85262	205436_s_at	H2AX	ENSG00000188486	H2A.X variant histone [Source:HGNC Symbol;Acc:HGNC:4739]	chr11	119093854	119095467	-1	q23.3	66.42	protein_coding	1614
0.0005235	0.00218	24.34	46.45	1.90838	213344_s_at	H2AX	ENSG00000188486	H2A.X variant histone [Source:HGNC Symbol;Acc:HGNC:4739]	chr11	119093854	119095467	-1	q23.3	66.42	protein_coding	1614
1.46e-05	0.000109	8.49	45.75	5.38869	1557129_a_at	FAM111B	ENSG00000189057	FAM111 trypsin like peptidase B [Source:HGNC Symbol;Acc:HGNC:24200]	chr11	59107185	59127412	1	q12.1	38.92	protein_coding	3865
0.0001207	0.00064	4.59	12.01	2.61656	1557128_at	FAM111B	ENSG00000189057	FAM111 trypsin like peptidase B [Source:HGNC Symbol;Acc:HGNC:24200]	chr11	59107185	59127412	1	q12.1	38.92	protein_coding	3865
0.0026808	0.00849	65.44	31.55	0.482121	220243_at	ZBTB44	ENSG00000196323	zinc finger and BTB domain containing 44 [Source:HGNC Symbol;Acc:HGNC:25001]	chr11	130226677	130314917	-1	q24.3	39.22	protein_coding	11032
0.0003038	0.00138	7.36	13.68	1.8587	209892_at	FUT4	ENSG00000196371	fucosyltransferase 4 [Source:HGNC Symbol;Acc:HGNC:4015]	chr11	94543921	94549895	1	q21	48.89	protein_coding	5975
0.0003989	0.00174	8.31	14.51	1.74609	209893_s_at	FUT4	ENSG00000196371	fucosyltransferase 4 [Source:HGNC Symbol;Acc:HGNC:4015]	chr11	94543921	94549895	1	q21	48.89	protein_coding	5975
0.0010446	0.00388	17.88	8.66	0.48434	1566093_at	ARHGEF12	ENSG00000196914	Rho guanine nucleotide exchange factor 12 [Source:HGNC Symbol;Acc:HGNC:14193]	chr11	120336413	120489937	1	q23.3	37.52	protein_coding	24906
0.0004731	0.00201	70.37	30.84	0.438255	213596_at	CASP4	ENSG00000196954	caspase 4 [Source:HGNC Symbol;Acc:HGNC:1505]	chr11	104942866	104969366	-1	q22.3	37.67	protein_coding	6665
1.67e-05	0.000122	113.09	255.75	2.26147	225315_at	MRPL21	ENSG00000197345	mitochondrial ribosomal protein L21 [Source:HGNC Symbol;Acc:HGNC:14479]	chr11	68891276	68903835	-1	q13.3	50.69	protein_coding	2825
< 1e-07	< 1e-07	227.34	28.27	0.124351	232449_at	BCO2	ENSG00000197580	beta-carotene oxygenase 2 [Source:HGNC Symbol;Acc:HGNC:18503]	chr11	112175510	112224699	1	q23.1	40.07	protein_coding	6763
0.0020523	0.0068	127.13	194.87	1.53284	224866_at	FAR1	ENSG00000197601	fatty acyl-CoA reductase 1 [Source:HGNC Symbol;Acc:HGNC:26222]	chr11	13668668	13732346	1	p15.3	36.04	protein_coding	7503
0.0043451	0.0127	383.98	258.68	0.673681	224865_at	FAR1	ENSG00000197601	fatty acyl-CoA reductase 1 [Source:HGNC Symbol;Acc:HGNC:26222]	chr11	13668668	13732346	1	p15.3	36.04	protein_coding	7503
0.0009139	0.00348	22.14	65.71	2.96793	226818_at	MPEG1	ENSG00000197629	macrophage expressed 1 [Source:HGNC Symbol;Acc:HGNC:29619]	chr11	59208510	59212927	-1	q12.1	46.97	protein_coding	4418
0.000454	0.00194	106.56	57.38	0.538476	1563458_at	PARVA	ENSG00000197702	parvin alpha [Source:HGNC Symbol;Acc:HGNC:14652]	chr11	12377563	12535356	1	p15.3	43.49	protein_coding	12471
0.0064492	0.0176	41.75	27.42	0.656766	230005_at	SVIP	ENSG00000198168	small VCP interacting protein [Source:HGNC Symbol;Acc:HGNC:25238]	chr11	22813799	22830299	-1	p14.3	36.62	protein_coding	5201
6.6e-06	5.55e-05	14.33	49.05	3.42289	227687_at	HYLS1	ENSG00000198331	HYLS1 centriolar and ciliogenesis associated [Source:HGNC Symbol;Acc:HGNC:26558]	chr11	125883614	125900646	1	q24.2	41.34	protein_coding	2389
0.0021666	0.00712	769.93	535.34	0.69531	208407_s_at	CTNND1	ENSG00000198561	catenin delta 1 [Source:HGNC Symbol;Acc:HGNC:2515]	chr11	57753243	57819546	1	q12.1	42.81	protein_coding	15212
1.48e-05	0.00011	120.5	213.4	1.77095	202026_at	SDHD	ENSG00000204370	succinate dehydrogenase complex subunit D [Source:HGNC Symbol;Acc:HGNC:10683]	chr11	112086824	112120016	1	q23.1	41.76	protein_coding	2790
0.0007368	0.00291	50	87.24	1.7448	229099_at	UQCC3	ENSG00000204922	ubiquinol-cytochrome c reductase complex assembly factor 3 [Source:HGNC Symbol;Acc:HGNC:34399]	chr11	62670273	62673686	1	q12.3	52.84	protein_coding	2397
< 1e-07	< 1e-07	152.47	9.17	0.060143	236666_s_at	LRRC10B	ENSG00000204950	leucine rich repeat containing 10B [Source:HGNC Symbol;Acc:HGNC:37215]	chr11	61508749	61511018	1	q12.2	67.71	protein_coding	2270
0.0001268	0.000667	36.44	14.31	0.3927	230674_at	LGR4	ENSG00000205213	leucine rich repeat containing G protein-coupled receptor 4 [Source:HGNC Symbol;Acc:HGNC:13299]	chr11	27365961	27472790	-1	p14.1	39.09	protein_coding	6355
0.0048726	0.0139	26.01	16.21	0.623222	1556567_at	NAP1L4	ENSG00000205531	nucleosome assembly protein 1 like 4 [Source:HGNC Symbol;Acc:HGNC:7640]	chr11	2944431	2992377	-1	p15.4	44.27	protein_coding	5200
4.29e-05	0.000266	116.37	187.74	1.6133	231045_x_at	SELENOH	ENSG00000211450	selenoprotein H [Source:HGNC Symbol;Acc:HGNC:18251]	chr11	57741250	57743554	1	q12.1	51.67	protein_coding	2305
0.0001301	0.000681	52.36	95.43	1.82257	224677_x_at	SELENOH	ENSG00000211450	selenoprotein H [Source:HGNC Symbol;Acc:HGNC:18251]	chr11	57741250	57743554	1	q12.1	51.67	protein_coding	2305
0.0082995	0.0216	375.17	552.51	1.47269	201175_at	TMX2	ENSG00000213593	thioredoxin related transmembrane protein 2 [Source:HGNC Symbol;Acc:HGNC:30739]	chr11	57712593	57740973	1	q12.1	45.19	protein_coding	2253
0.0009032	0.00344	220.39	394.82	1.79146	201740_at	NDUFS3	ENSG00000213619	NADH:ubiquinone oxidoreductase core subunit S3 [Source:HGNC Symbol;Acc:HGNC:7710]	chr11	47565336	47584562	1	p11.2	48.67	protein_coding	4507
4.64e-05	0.000284	74.04	22.88	0.309022	228338_at	COLCA2	ENSG00000214290	colorectal cancer associated 2 [Source:HGNC Symbol;Acc:HGNC:26978]	chr11	111298555	111308735	1	q23.1	45.23	protein_coding	2059
0.001942	0.0065	17.04	28.48	1.67136	232322_x_at	STARD10	ENSG00000214530	StAR related lipid transfer domain containing 10 [Source:HGNC Symbol;Acc:HGNC:10666]	chr11	72754729	72794047	-1	q13.4	54.41	protein_coding	4076
4.06e-05	0.000254	10.52	20.29	1.92871	222264_at	HNRNPUL2	ENSG00000214753	heterogeneous nuclear ribonucleoprotein U like 2 [Source:HGNC Symbol;Acc:HGNC:25451]	chr11	62712630	62727457	-1	q12.3	46.25	protein_coding	5401
3.31e-05	0.000215	10	16.85	1.685	216080_s_at	FADS3	ENSG00000221968	fatty acid desaturase 3 [Source:HGNC Symbol;Acc:HGNC:3576]	chr11	61873519	61892051	-1	q12.2	57.37	protein_coding	6294
0.0066078	0.018	16.63	23.99	1.44257	204257_at	FADS3	ENSG00000221968	fatty acid desaturase 3 [Source:HGNC Symbol;Acc:HGNC:3576]	chr11	61873519	61892051	-1	q12.2	57.37	protein_coding	6294
0.0004936	0.00208	18.25	10.03	0.549589	1563776_at		ENSG00000245498	novel transcript, antisense to C11orf61	chr11	124800424	124834487	1	q24.2	43.44	lncRNA	10457
0.0011437	0.00417	1780.57	1112.44	0.624766	224565_at	NEAT1	ENSG00000245532	nuclear paraspeckle assembly transcript 1 [Source:HGNC Symbol;Acc:HGNC:30815]	chr11	65422774	65445540	1	q13.1	44.06	lncRNA	22767
0.0001346	0.0007	157.93	306.78	1.94251	228612_at	RAB30-DT	ENSG00000246067	RAB30 divergent transcript [Source:HGNC Symbol;Acc:HGNC:48672]	chr11	83072052	83107789	1	q14.1	39.85	lncRNA	7192
< 1e-07	< 1e-07	1052.43	338.71	0.321836	235010_at	ZBED5-AS1	ENSG00000247271	ZBED5 antisense RNA 1 [Source:HGNC Symbol;Acc:HGNC:48646]	chr11	10858179	10908972	1	p15.4	40.64	lncRNA	4599
< 1e-07	1.6e-06	78.03	18.6	0.23837	240293_at	CCDC153	ENSG00000248712	coiled-coil domain containing 153 [Source:HGNC Symbol;Acc:HGNC:27446]	chr11	119189638	119196769	-1	q23.3	50.84	protein_coding	2556
1.7e-06	1.81e-05	2056.73	730.76	0.355302	223578_x_at	MALAT1	ENSG00000251562	metastasis associated lung adenocarcinoma transcript 1 [Source:HGNC Symbol;Acc:HGNC:29665]	chr11	65497688	65506516	1	q13.1	40.56	lncRNA	8829
4.4e-06	3.97e-05	2125.2	841.96	0.396179	223940_x_at	MALAT1	ENSG00000251562	metastasis associated lung adenocarcinoma transcript 1 [Source:HGNC Symbol;Acc:HGNC:29665]	chr11	65497688	65506516	1	q13.1	40.56	lncRNA	8829
0.0004591	0.00196	5537.37	2603.35	0.470142	224568_x_at	MALAT1	ENSG00000251562	metastasis associated lung adenocarcinoma transcript 1 [Source:HGNC Symbol;Acc:HGNC:29665]	chr11	65497688	65506516	1	q13.1	40.56	lncRNA	8829
0.0005406	0.00224	487.43	210.52	0.431898	224559_at	MALAT1	ENSG00000251562	metastasis associated lung adenocarcinoma transcript 1 [Source:HGNC Symbol;Acc:HGNC:29665]	chr11	65497688	65506516	1	q13.1	40.56	lncRNA	8829
0.0006274	0.00254	1929.68	952.44	0.493574	224558_s_at	MALAT1	ENSG00000251562	metastasis associated lung adenocarcinoma transcript 1 [Source:HGNC Symbol;Acc:HGNC:29665]	chr11	65497688	65506516	1	q13.1	40.56	lncRNA	8829
0.0006491	0.00261	2448.93	1047.42	0.427705	227510_x_at	MALAT1	ENSG00000251562	metastasis associated lung adenocarcinoma transcript 1 [Source:HGNC Symbol;Acc:HGNC:29665]	chr11	65497688	65506516	1	q13.1	40.56	lncRNA	8829
0.0014767	0.00517	1324.69	553.69	0.417977	228582_x_at	MALAT1	ENSG00000251562	metastasis associated lung adenocarcinoma transcript 1 [Source:HGNC Symbol;Acc:HGNC:29665]	chr11	65497688	65506516	1	q13.1	40.56	lncRNA	8829
2.76e-05	0.000185	37.43	84.74	2.26396	231858_x_at	AP5B1	ENSG00000254470	adaptor related protein complex 5 subunit beta 1 [Source:HGNC Symbol;Acc:HGNC:25104]	chr11	65773898	65780976	-1	q13.1	59.61	protein_coding	6980
< 1e-07	< 1e-07	7.67	59.5	7.7575	243018_at	BBOX1-AS1	ENSG00000254560	BBOX1 antisense RNA 1 [Source:HGNC Symbol;Acc:HGNC:50700]	chr11	27047186	27220113	-1	p14.1	38.93	lncRNA	1343
0.0092567	0.0237	2685.51	3906.28	1.45458	200689_x_at	EEF1G	ENSG00000254772	eukaryotic translation elongation factor 1 gamma [Source:HGNC Symbol;Acc:HGNC:3213]	chr11	62559596	62574086	-1	q12.3	47.78	protein_coding	2639
0.0003721	0.00165	35.56	16.52	0.464567	1561355_at	LMNTD2-AS1	ENSG00000254815	LMNTD2 antisense RNA 1 [Source:HGNC Symbol;Acc:HGNC:41204]	chr11	557595	560107	1	p15.5	63.07	lncRNA	2418
1.85e-05	0.000133	68.75	18.09	0.263127	1569453_a_at	LMNTD2-AS1	ENSG00000254815	LMNTD2 antisense RNA 1	chr11	557595	560107	1	p15.5		lncRNA
0.0002187	0.00105	22.85	46.86	2.05077	232510_s_at	DPP3	ENSG00000254986	dipeptidyl peptidase 3 [Source:HGNC Symbol;Acc:HGNC:3008]	chr11	66480013	66509657	1	q13.2	52.26	protein_coding	3977
0.0043038	0.0126	20.41	38.72	1.89711	218567_x_at	DPP3	ENSG00000254986	dipeptidyl peptidase 3 [Source:HGNC Symbol;Acc:HGNC:3008]	chr11	66480013	66509657	1	q13.2	52.26	protein_coding	3977
5.27e-05	0.000316	285.75	72.07	0.252213	225381_at	MIR100HG	ENSG00000255248	mir-100-let-7a-2-mir-125b-1 cluster host gene [Source:HGNC Symbol;Acc:HGNC:39522]	chr11	122028325	122556721	-1	q24.1	39.21	lncRNA	28649
0.0013286	0.00473	17.12	28.7	1.6764	203040_s_at	HMBS	ENSG00000256269	hydroxymethylbilane synthase [Source:HGNC Symbol;Acc:HGNC:4982]	chr11	119084866	119093549	1	q23.3	50.91	protein_coding	4447
< 1e-07	< 1e-07	101.85	8.21	0.0806087	243803_at	C11orf97	ENSG00000257057	chromosome 11 open reading frame 97 [Source:HGNC Symbol;Acc:HGNC:49544]	chr11	94512461	94532123	1	q21	40.54	protein_coding	672
0.0003062	0.0014	71.55	31.82	0.444724	221044_s_at	TRIM34	ENSG00000258659	tripartite motif containing 34 [Source:HGNC Symbol;Acc:HGNC:10063]	chr11	5619764	5644398	1	p15.4	41.62	protein_coding	2672
1.3e-06	1.45e-05	4.57	15.42	3.37418	204580_at	MMP12	ENSG00000262406	matrix metallopeptidase 12 [Source:HGNC Symbol;Acc:HGNC:7158]	chr11	102862736	102874982	-1	q22.2	38.37	protein_coding	1822
0.000254	0.00119	36.25	64.18	1.77048	213152_s_at	SRSF8	ENSG00000263465	serine and arginine rich splicing factor 8 [Source:HGNC Symbol;Acc:HGNC:16988]	chr11	95066919	95071225	1	q21	45.07	protein_coding	4307
0.0086982	0.0225	59.24	114.59	1.93433	226793_at	LINC00294	ENSG00000280798	long intergenic non-protein coding RNA 294 [Source:HGNC Symbol;Acc:HGNC:27456]	chr11	33076149	33079454	1	p13	45.1	lncRNA	3306
< 1e-07	< 1e-07	108.35	10.37	0.0957084	1568906_at	MIR34BHG	ENSG00000286028	novel transcript, antisense to BTG4	chr11	111510600	111513888	1	q23.1		lncRNA
0.0093587	0.0239	672.4	449.42	0.668382	205647_at	RAD52	ENSG00000002016	RAD52 homolog, DNA repair protein [Source:HGNC Symbol;Acc:HGNC:9824]	chr12	911736	990053	-1	p13.33	45.19	protein_coding	4503
0.0081366	0.0213	33.25	61.13	1.8385	200894_s_at	FKBP4	ENSG00000004478	FKBP prolyl isomerase 4 [Source:HGNC Symbol;Acc:HGNC:3720]	chr12	2794970	2805423	1	p13.33	51.53	protein_coding	5163
1.05e-05	8.27e-05	223.28	416.82	1.8668	212918_at	RECQL	ENSG00000004700	RecQ like helicase [Source:HGNC Symbol;Acc:HGNC:9948]	chr12	21468910	21501669	-1	p12.1	37.57	protein_coding	3779
0.0080911	0.0212	10.7	16.55	1.54673	210568_s_at	RECQL	ENSG00000004700	RecQ like helicase [Source:HGNC Symbol;Acc:HGNC:9948]	chr12	21468910	21501669	-1	p12.1	37.57	protein_coding	3779
0.0007879	0.00307	189.45	284.27	1.5005	201346_at	ADIPOR2	ENSG00000006831	adiponectin receptor 2 [Source:HGNC Symbol;Acc:HGNC:24041]	chr12	1688574	1788674	1	p13.33	39.4	protein_coding	5831
0.0059209	0.0164	26.63	13.33	0.500563	239001_at	MGST1	ENSG00000008394	microsomal glutathione S-transferase 1 [Source:HGNC Symbol;Acc:HGNC:7061]	chr12	16347142	16609259	1	p12.3	36.94	protein_coding	7441
5e-06	4.41e-05	252.88	125.13	0.49482	209674_at	CRY1	ENSG00000008405	cryptochrome circadian regulator 1 [Source:HGNC Symbol;Acc:HGNC:2384]	chr12	106991364	107093549	-1	q23.3	37.55	protein_coding	4782
3.47e-05	0.000224	964.74	373.33	0.386975	233317_at	CD9	ENSG00000010278	CD9 molecule [Source:HGNC Symbol;Acc:HGNC:1709]	chr12	6199715	6238271	1	p13.31	51.04	protein_coding	5829
6.91e-05	0.000399	493.48	976.85	1.97951	201005_at	CD9	ENSG00000010278	CD9 molecule [Source:HGNC Symbol;Acc:HGNC:1709]	chr12	6199715	6238271	1	p13.31	51.04	protein_coding	5829
0.0022753	0.00742	128.7	258.89	2.01158	201774_s_at	NCAPD2	ENSG00000010292	non-SMC condensin I complex subunit D2 [Source:HGNC Symbol;Acc:HGNC:24305]	chr12	6493356	6531955	1	p13.31	46.34	protein_coding	6470
< 1e-07	< 1e-07	97.41	8.99	0.0922903	206076_at	LRRC23	ENSG00000010626	leucine rich repeat containing 23 [Source:HGNC Symbol;Acc:HGNC:19138]	chr12	6873569	6914241	1	p13.31	47.35	protein_coding	3052
< 1e-07	1.6e-06	446.24	984.2	2.20554	201894_s_at	DCN	ENSG00000011465	decorin [Source:HGNC Symbol;Acc:HGNC:2705]	chr12	91140484	91183217	-1	q21.33	34.9	protein_coding	12941
1.6e-05	0.000118	16.58	40.07	2.41677	208149_x_at	DDX11	ENSG00000013573	DEAD/H-box helicase 11 [Source:HGNC Symbol;Acc:HGNC:2736]	chr12	31073860	31104799	1	p11.21	52.26	protein_coding	8367
0.0001268	0.000667	22.08	48.65	2.20335	208159_x_at	DDX11	ENSG00000013573	DEAD/H-box helicase 11 [Source:HGNC Symbol;Acc:HGNC:2736]	chr12	31073860	31104799	1	p11.21	52.26	protein_coding	8367
3.36e-05	0.000218	9.52	17.85	1.875	213378_s_at	DDX11	ENSG00000013573	DEAD/H-box helicase 11 [Source:HGNC Symbol;Acc:HGNC:2736]	chr12	31073860	31104799	1	p11.21	52.26	protein_coding	8367
0.0069934	0.0188	39.95	64.28	1.60901	218450_at	HEBP1	ENSG00000013583	heme binding protein 1 [Source:HGNC Symbol;Acc:HGNC:17176]	chr12	12974870	13000265	-1	p13.1	43.51	protein_coding	3428
5.86e-05	0.000346	18.85	121.19	6.42918	203108_at	GPRC5A	ENSG00000013588	G protein-coupled receptor class C group 5 member A [Source:HGNC Symbol;Acc:HGNC:9836]	chr12	12891559	12917937	1	p13.1	46.32	protein_coding	7663
0.0001266	0.000666	13.88	65.35	4.70821	212444_at	GPRC5A	ENSG00000013588	G protein-coupled receptor class C group 5 member A [Source:HGNC Symbol;Acc:HGNC:9836]	chr12	12891559	12917937	1	p13.1	46.32	protein_coding	7663
0.0098468	0.025	8.33	12.02	1.44298	206238_s_at	YAF2	ENSG00000015153	YY1 associated factor 2 [Source:HGNC Symbol;Acc:HGNC:17363]	chr12	42157104	42238349	-1	q12	39.02	protein_coding	10839
0.001963	0.00655	5.06	13.02	2.57312	227202_at	CNTN1	ENSG00000018236	contactin 1 [Source:HGNC Symbol;Acc:HGNC:2171]	chr12	40692439	41072415	1	q12	35.21	protein_coding	7492
0.0031615	0.00974	6.11	18.45	3.01964	227209_at	CNTN1	ENSG00000018236	contactin 1 [Source:HGNC Symbol;Acc:HGNC:2171]	chr12	40692439	41072415	1	q12	35.21	protein_coding	7492
0.0065176	0.0178	438.83	275.34	0.627441	208632_at	RNF10	ENSG00000022840	ring finger protein 10 [Source:HGNC Symbol;Acc:HGNC:10055]	chr12	120533480	120577588	1	q24.31	45.25	protein_coding	5900
0.0054027	0.0152	10.67	18.88	1.76945	205700_at	HSD17B6	ENSG00000025423	hydroxysteroid 17-beta dehydrogenase 6 [Source:HGNC Symbol;Acc:HGNC:23316]	chr12	56752161	56787790	1	q13.3	44.92	protein_coding	2272
0.0004443	0.0019	149.74	86.26	0.576065	223675_s_at	VEZT	ENSG00000028203	vezatin, adherens junctions transmembrane protein [Source:HGNC Symbol;Acc:HGNC:18258]	chr12	95217746	95302799	1	q22	38.6	protein_coding	8766
0.0014511	0.0051	122.87	77	0.626679	207263_x_at	VEZT	ENSG00000028203	vezatin, adherens junctions transmembrane protein [Source:HGNC Symbol;Acc:HGNC:18258]	chr12	95217746	95302799	1	q22	38.6	protein_coding	8766
0.0018007	0.0061	203.77	130.86	0.642195	223090_x_at	VEZT	ENSG00000028203	vezatin, adherens junctions transmembrane protein [Source:HGNC Symbol;Acc:HGNC:18258]	chr12	95217746	95302799	1	q22	38.6	protein_coding	8766
0.0019303	0.00646	46.34	27.4	0.591282	223089_at	VEZT	ENSG00000028203	vezatin, adherens junctions transmembrane protein [Source:HGNC Symbol;Acc:HGNC:18258]	chr12	95217746	95302799	1	q22	38.6	protein_coding	8766
0.0002894	0.00133	29.64	86.84	2.92982	223586_at	ARNTL2	ENSG00000029153	aryl hydrocarbon receptor nuclear translocator like 2 [Source:HGNC Symbol;Acc:HGNC:18984]	chr12	27332854	27425289	1	p11.23	39.26	protein_coding	6983
0.0018885	0.00634	6.02	11.22	1.86379	220658_s_at	ARNTL2	ENSG00000029153	aryl hydrocarbon receptor nuclear translocator like 2 [Source:HGNC Symbol;Acc:HGNC:18984]	chr12	27332854	27425289	1	p11.23	39.26	protein_coding	6983
0.0075198	0.02	8.21	14.74	1.79537	224204_x_at	ARNTL2	ENSG00000029153	aryl hydrocarbon receptor nuclear translocator like 2 [Source:HGNC Symbol;Acc:HGNC:18984]	chr12	27332854	27425289	1	p11.23	39.26	protein_coding	6983
8.41e-05	0.000469	4.85	24.95	5.14433	231348_s_at	LMO3	ENSG00000048540	LIM domain only 3 [Source:HGNC Symbol;Acc:HGNC:6643]	chr12	16548372	16610594	-1	p12.3	35.63	protein_coding	10002
8.43e-05	0.00047	4.82	21.8	4.52282	204424_s_at	LMO3	ENSG00000048540	LIM domain only 3 [Source:HGNC Symbol;Acc:HGNC:6643]	chr12	16548372	16610594	-1	p12.3	35.63	protein_coding	10002
3.84e-05	0.000243	35.31	10.88	0.308128	222456_s_at	LIMA1	ENSG00000050405	LIM domain and actin binding 1 [Source:HGNC Symbol;Acc:HGNC:24636]	chr12	50175788	50283546	-1	q13.12	42.32	protein_coding	6317
7.49e-05	0.000426	177.28	70.63	0.398409	222457_s_at	LIMA1	ENSG00000050405	LIM domain and actin binding 1 [Source:HGNC Symbol;Acc:HGNC:24636]	chr12	50175788	50283546	-1	q13.12	42.32	protein_coding	6317
0.0008328	0.00322	399.64	226.69	0.567236	217892_s_at	LIMA1	ENSG00000050405	LIM domain and actin binding 1 [Source:HGNC Symbol;Acc:HGNC:24636]	chr12	50175788	50283546	-1	q13.12	42.32	protein_coding	6317
0.0020022	0.00665	13.04	6.97	0.534509	233040_at	PLEKHA5	ENSG00000052126	pleckstrin homology domain containing A5 [Source:HGNC Symbol;Acc:HGNC:30036]	chr12	19129733	19376400	1	p12.3	38.1	protein_coding	12577
< 1e-07	< 1e-07	1245.09	550.59	0.442209	220952_s_at	PLEKHA5	ENSG00000052126	pleckstrin homology domain containing A5 [Source:HGNC Symbol;Acc:HGNC:30036]	chr12	19129733	19376400	1	p12.3	38.1	protein_coding	12577
0.0002326	0.00111	263.94	102.16	0.387058	207717_s_at	PKP2	ENSG00000057294	plakophilin 2 [Source:HGNC Symbol;Acc:HGNC:9024]	chr12	32790755	32896777	-1	p11.21	40.77	protein_coding	6970
0.0001773	0.000883	363.09	190.09	0.523534	201161_s_at	YBX3	ENSG00000060138	Y-box binding protein 3 [Source:HGNC Symbol;Acc:HGNC:2428]	chr12	10699089	10723323	-1	p13.2	39.08	protein_coding	8621
0.000361	0.0016	43.66	19.43	0.44503	213319_s_at	YBX3	ENSG00000060138	Y-box binding protein 3 [Source:HGNC Symbol;Acc:HGNC:2428]	chr12	10699089	10723323	-1	p13.2	39.08	protein_coding	8621
< 1e-07	< 1e-07	33.39	6.92	0.207248	214811_at	RIMBP2	ENSG00000060709	RIMS binding protein 2 [Source:HGNC Symbol;Acc:HGNC:30339]	chr12	130396137	130716281	-1	q24.33	48.94	protein_coding	9655
< 1e-07	1.6e-06	4.52	37.34	8.26106	214452_at	BCAT1	ENSG00000060982	branched chain amino acid transaminase 1 [Source:HGNC Symbol;Acc:HGNC:976]	chr12	24810024	24949101	-1	p12.1	40.01	protein_coding	11415
< 1e-07	< 1e-07	15.25	287.48	18.8511	226517_at	BCAT1	ENSG00000060982	branched chain amino acid transaminase 1 [Source:HGNC Symbol;Acc:HGNC:976]	chr12	24810024	24949101	-1	p12.1	40.01	protein_coding	11415
< 1e-07	< 1e-07	14.64	228.23	15.5895	225285_at	BCAT1	ENSG00000060982	branched chain amino acid transaminase 1 [Source:HGNC Symbol;Acc:HGNC:976]	chr12	24810024	24949101	-1	p12.1	40.01	protein_coding	11415
0.0016896	0.00578	569.65	917.83	1.61122	217942_at	MRPS35	ENSG00000061794	mitochondrial ribosomal protein S35 [Source:HGNC Symbol;Acc:HGNC:16635]	chr12	27710822	27756295	1	p11.22	38.61	protein_coding	1930
0.0004463	0.00191	56.12	112.54	2.00535	221652_s_at	INTS13	ENSG00000064102	integrator complex subunit 13 [Source:HGNC Symbol;Acc:HGNC:20174]	chr12	26905181	26938326	-1	p11.23	36.38	protein_coding	3059
0.0056373	0.0157	184.66	313.43	1.69734	222477_s_at	TM7SF3	ENSG00000064115	transmembrane 7 superfamily member 3 [Source:HGNC Symbol;Acc:HGNC:23049]	chr12	26971579	27014434	-1	p11.23	40.31	protein_coding	5504
0.0097265	0.0247	11.7	18.03	1.54103	203385_at	DGKA	ENSG00000065357	diacylglycerol kinase alpha [Source:HGNC Symbol;Acc:HGNC:2849]	chr12	55927319	55954027	1	q13.2	48.71	protein_coding	10098
0.0002899	0.00133	86.61	135.32	1.56241	224872_at	DIP2B	ENSG00000066084	disco interacting protein 2 homolog B [Source:HGNC Symbol;Acc:HGNC:29284]	chr12	50504985	50748657	1	q13.12	41.84	protein_coding	10351
0.000783	0.00306	73.45	33.45	0.455412	209281_s_at	ATP2B1	ENSG00000070961	ATPase plasma membrane Ca2+ transporting 1 [Source:HGNC Symbol;Acc:HGNC:814]	chr12	89588049	89709300	-1	q21.33	36.37	protein_coding	9500
0.0055544	0.0155	54.25	92.07	1.69714	202040_s_at	KDM5A	ENSG00000073614	lysine demethylase 5A [Source:HGNC Symbol;Acc:HGNC:9886]	chr12	280057	389320	-1	p13.33	39.44	protein_coding	12029
0.0015143	0.00528	152.75	64.67	0.423372	223315_at	NTN4	ENSG00000074527	netrin 4 [Source:HGNC Symbol;Acc:HGNC:13658]	chr12	95657807	95791189	-1	q22	40.1	protein_coding	4365
0.0003137	0.00143	8.52	13.57	1.59272	235439_at	RBMS2	ENSG00000076067	RNA binding motif single stranded interacting protein 2 [Source:HGNC Symbol;Acc:HGNC:9909]	chr12	56521820	56596193	1	q13.3	44.05	protein_coding	8914
1e-07	1.6e-06	179.14	363.39	2.02853	202330_s_at	UNG	ENSG00000076248	uracil DNA glycosylase [Source:HGNC Symbol;Acc:HGNC:12572]	chr12	109097597	109110992	1	q24.11	47.26	protein_coding	2544
2e-07	2.96e-06	13.86	57.89	4.17677	219099_at	TIGAR	ENSG00000078237	TP53 induced glycolysis regulatory phosphatase [Source:HGNC Symbol;Acc:HGNC:1185]	chr12	4307763	4360028	1	p13.32	41.85	protein_coding	9444
0.0019934	0.00663	310.21	508.56	1.63941	226619_at	SENP1	ENSG00000079387	SUMO specific peptidase 1 [Source:HGNC Symbol;Acc:HGNC:17927]	chr12	48042897	48106079	-1	q13.11	38.55	protein_coding	6114
0.0072905	0.0195	510.32	768.94	1.50678	203885_at	RAB21	ENSG00000080371	RAB21, member RAS oncogene family [Source:HGNC Symbol;Acc:HGNC:18263]	chr12	71754863	71800286	1	q21.1	37.14	protein_coding	16048
0.0090444	0.0232	6.38	15.84	2.48276	206643_at	HAL	ENSG00000084110	histidine ammonia-lyase [Source:HGNC Symbol;Acc:HGNC:4806]	chr12	95972662	95996365	-1	q23.1	43.36	protein_coding	5146
0.0020052	0.00666	26.06	45.39	1.74175	217821_s_at	WBP11	ENSG00000084463	WW domain binding protein 11 [Source:HGNC Symbol;Acc:HGNC:16461]	chr12	14784582	14803486	-1	p12.3	37.11	protein_coding	5258
3.2e-06	3.07e-05	6.85	31.45	4.59124	216219_at	AQP6	ENSG00000086159	aquaporin 6 [Source:HGNC Symbol;Acc:HGNC:639]	chr12	49967194	49977139	1	q13.12	57.52	protein_coding	5129
1.38e-05	0.000104	69.22	122.42	1.76856	203105_s_at	DNM1L	ENSG00000087470	dynamin 1 like [Source:HGNC Symbol;Acc:HGNC:2973]	chr12	32679200	32745650	1	p11.21	38.21	protein_coding	7282
0.0009496	0.00359	18.21	31.86	1.74959	212871_at	MAPKAPK5	ENSG00000089022	MAPK activated protein kinase 5 [Source:HGNC Symbol;Acc:HGNC:6889]	chr12	111842228	111902222	1	q24.12	43.64	protein_coding	13740
9.5e-06	7.59e-05	7.56	21.83	2.88757	205552_s_at	OAS1	ENSG00000089127	2'-5'-oligoadenylate synthetase 1 [Source:HGNC Symbol;Acc:HGNC:8086]	chr12	112905856	112933219	1	q24.13	43.14	protein_coding	13021
2.04e-05	0.000144	22.37	78.16	3.49397	202869_at	OAS1	ENSG00000089127	2'-5'-oligoadenylate synthetase 1 [Source:HGNC Symbol;Acc:HGNC:8086]	chr12	112905856	112933219	1	q24.13	43.14	protein_coding	13021
6.4e-06	5.41e-05	16.25	31.19	1.91938	216232_s_at	GCN1	ENSG00000089154	GCN1 activator of EIF2AK4 [Source:HGNC Symbol;Acc:HGNC:4199]	chr12	120127202	120194715	-1	q24.23	49.67	protein_coding	9660
0.0078994	0.0208	138.19	188.25	1.36225	200948_at	MLF2	ENSG00000089693	myeloid leukemia factor 2 [Source:HGNC Symbol;Acc:HGNC:7126]	chr12	6747996	6767475	-1	p13.31	52.27	protein_coding	3367
0.0003792	0.00167	117.27	534.82	4.56059	213975_s_at	LYZ	ENSG00000090382	lysozyme [Source:HGNC Symbol;Acc:HGNC:6740]	chr12	69348381	69354234	1	q15	36.54	protein_coding	1724
0.0075904	0.0201	20.76	31.02	1.49422	226949_at	GOLGA3	ENSG00000090615	golgin A3 [Source:HGNC Symbol;Acc:HGNC:4426]	chr12	132768914	132829078	-1	q24.33	53.6	protein_coding	10615
0.0018962	0.00636	547.17	801.05	1.46399	212585_at	OSBPL8	ENSG00000091039	oxysterol binding protein like 8 [Source:HGNC Symbol;Acc:HGNC:16396]	chr12	76351797	76559809	-1	q21.2	36.48	protein_coding	9198
0.0024121	0.00778	529.97	784.03	1.47939	212582_at	OSBPL8	ENSG00000091039	oxysterol binding protein like 8 [Source:HGNC Symbol;Acc:HGNC:16396]	chr12	76351797	76559809	-1	q21.2	36.48	protein_coding	9198
0.000338	0.00152	1290.8	1856.46	1.43822	212082_s_at	MYL6	ENSG00000092841	myosin light chain 6 [Source:HGNC Symbol;Acc:HGNC:7587]	chr12	56158346	56163496	1	q13.2	51.25	protein_coding	4424
0.0005339	0.00221	6.72	15.16	2.25595	242069_at	CBX5	ENSG00000094916	chromobox 5 [Source:HGNC Symbol;Acc:HGNC:1555]	chr12	54230942	54280133	-1	q13.13	42.96	protein_coding	15038
0.0003452	0.00155	6.45	14.14	2.19225	203736_s_at	PPFIBP1	ENSG00000110841	PPFIA binding protein 1 [Source:HGNC Symbol;Acc:HGNC:9249]	chr12	27523431	27695564	1	p11.23	39.81	protein_coding	11690
2e-07	2.96e-06	113.88	450.37	3.95478	221676_s_at	CORO1C	ENSG00000110880	coronin 1C [Source:HGNC Symbol;Acc:HGNC:2254]	chr12	108645109	108731526	-1	q24.11	41.32	protein_coding	6462
0.0082945	0.0216	191.36	400.29	2.09182	222409_at	CORO1C	ENSG00000110880	coronin 1C [Source:HGNC Symbol;Acc:HGNC:2254]	chr12	108645109	108731526	-1	q24.11	41.32	protein_coding	6462
3.1e-06	2.99e-05	62.38	117.16	1.87817	223208_at	KCTD10	ENSG00000110906	potassium channel tetramerization domain containing 10 [Source:HGNC Symbol;Acc:HGNC:23236]	chr12	109448655	109477359	-1	q24.11	47.59	protein_coding	9681
2.9e-06	2.82e-05	42.84	110.42	2.5775	221260_s_at	CSRNP2	ENSG00000110925	cysteine and serine rich nuclear protein 2 [Source:HGNC Symbol;Acc:HGNC:16006]	chr12	51061205	51083664	-1	q13.12	46.64	protein_coding	5230
0.0009873	0.00371	10.19	21.73	2.13248	225042_s_at	CSRNP2	ENSG00000110925	cysteine and serine rich nuclear protein 2 [Source:HGNC Symbol;Acc:HGNC:16006]	chr12	51061205	51083664	-1	q13.12	46.64	protein_coding	5230
5.09e-05	0.000307	817.47	1277.39	1.56261	201322_at	ATP5F1B	ENSG00000110955	ATP synthase F1 subunit beta [Source:HGNC Symbol;Acc:HGNC:830]	chr12	56638175	56645984	-1	q13.3	45.22	protein_coding	2238
0.0015274	0.00531	1694.52	2399.14	1.41582	200627_at	PTGES3	ENSG00000110958	prostaglandin E synthase 3 [Source:HGNC Symbol;Acc:HGNC:16049]	chr12	56663341	56688408	-1	q13.3	44.13	protein_coding	3399
0.0002109	0.00102	38.23	23.87	0.624379	203796_s_at	BCL7A	ENSG00000110987	BAF chromatin remodeling complex subunit BCL7A [Source:HGNC Symbol;Acc:HGNC:1004]	chr12	122019422	122062044	1	q24.31	52.98	protein_coding	6565
0.0033294	0.0102	115.3	52.21	0.452819	229222_at	ACSS3	ENSG00000111058	acyl-CoA synthetase short chain family member 3 [Source:HGNC Symbol;Acc:HGNC:24723]	chr12	80936414	81261210	1	q21.31	35.63	protein_coding	18465
0.0026386	0.00838	27.99	15.15	0.541265	212494_at	TNS2	ENSG00000111077	tensin 2 [Source:HGNC Symbol;Acc:HGNC:19737]	chr12	53046969	53064379	1	q13.13	60.28	protein_coding	7964
0.0009816	0.00369	87.47	142.62	1.6305	209861_s_at	METAP2	ENSG00000111142	methionyl aminopeptidase 2 [Source:HGNC Symbol;Acc:HGNC:16672]	chr12	95473520	95515839	1	q22	39.23	protein_coding	4491
0.002521	0.00807	28.49	18.08	0.634609	213899_at	METAP2	ENSG00000111142	methionyl aminopeptidase 2 [Source:HGNC Symbol;Acc:HGNC:16672]	chr12	95473520	95515839	1	q22	39.23	protein_coding	4491
2.75e-05	0.000185	27.42	49.76	1.81473	218894_s_at	MAGOHB	ENSG00000111196	mago homolog B, exon junction complex subunit [Source:HGNC Symbol;Acc:HGNC:25504]	chr12	10604193	10613609	-1	p13.2	36.39	protein_coding	4839
0.0029997	0.00932	30.96	48.61	1.57009	214148_at	ITFG2	ENSG00000111203	integrin alpha FG-GAP repeat containing 2 [Source:HGNC Symbol;Acc:HGNC:30879]	chr12	2812622	2859791	1	p13.33	50.2	protein_coding	6255
< 1e-07	< 1e-07	13.54	95.06	7.02068	202580_x_at	FOXM1	ENSG00000111206	forkhead box M1 [Source:HGNC Symbol;Acc:HGNC:3818]	chr12	2857680	2877174	-1	p13.33	48.09	protein_coding	4919
< 1e-07	< 1e-07	82.21	33.33	0.405425	1560081_at	RAD51AP1	ENSG00000111247	RAD51 associated protein 1 [Source:HGNC Symbol;Acc:HGNC:16956]	chr12	4538798	4560047	1	p13.32	36.4	protein_coding	2557
0.0018447	0.00623	197.45	117.55	0.595341	201990_s_at	CREBL2	ENSG00000111269	cAMP responsive element binding protein like 2 [Source:HGNC Symbol;Acc:HGNC:2350]	chr12	12611827	12645108	1	p13.1	40.66	protein_coding	3922
0.0035378	0.0107	12.14	8.61	0.709226	237482_s_at	ACAD10	ENSG00000111271	acyl-CoA dehydrogenase family member 10 [Source:HGNC Symbol;Acc:HGNC:21597]	chr12	111686053	111757107	1	q24.12	47.12	protein_coding	8934
0.0039476	0.0117	43.91	31.97	0.72808	219986_s_at	ACAD10	ENSG00000111271	acyl-CoA dehydrogenase family member 10 [Source:HGNC Symbol;Acc:HGNC:21597]	chr12	111686053	111757107	1	q24.12	47.12	protein_coding	8934
0.0001913	0.000941	196.24	83.51	0.42555	236816_at	NAA25	ENSG00000111300	N-alpha-acetyltransferase 25, NatB auxiliary subunit [Source:HGNC Symbol;Acc:HGNC:25783]	chr12	112026689	112108796	-1	q24.13	41.37	protein_coding	9902
0.0009832	0.00369	43.9	83.13	1.89362	227245_at	NAA25	ENSG00000111300	N-alpha-acetyltransferase 25, NatB auxiliary subunit [Source:HGNC Symbol;Acc:HGNC:25783]	chr12	112026689	112108796	-1	q24.13	41.37	protein_coding	9902
0.006721	0.0182	15.09	21.67	1.43605	203005_at	LTBR	ENSG00000111321	lymphotoxin beta receptor [Source:HGNC Symbol;Acc:HGNC:6718]	chr12	6375045	6391571	1	p13.31	53.53	protein_coding	6151
< 1e-07	< 1e-07	13.97	74.74	5.35004	218400_at	OAS3	ENSG00000111331	2'-5'-oligoadenylate synthetase 3 [Source:HGNC Symbol;Acc:HGNC:8088]	chr12	112938051	112976460	1	q24.13	46.81	protein_coding	18045
1e-06	1.17e-05	12.43	77.89	6.26629	204972_at	OAS2	ENSG00000111335	2'-5'-oligoadenylate synthetase 2 [Source:HGNC Symbol;Acc:HGNC:8087]	chr12	112978395	113011723	1	q24.13	43.81	protein_coding	11233
5.7e-06	4.91e-05	7.71	19.82	2.57069	228607_at	OAS2	ENSG00000111335	2'-5'-oligoadenylate synthetase 2 [Source:HGNC Symbol;Acc:HGNC:8087]	chr12	112978395	113011723	1	q24.13	43.81	protein_coding	11233
1.1e-06	1.27e-05	6.64	17.47	2.63102	219752_at	RASAL1	ENSG00000111344	RAS protein activator like 1 [Source:HGNC Symbol;Acc:HGNC:9873]	chr12	113098819	113136239	-1	q24.13	51.7	protein_coding	4813
< 1e-07	< 1e-07	289.89	923.65	3.18621	218237_s_at	SLC38A1	ENSG00000111371	solute carrier family 38 member 1 [Source:HGNC Symbol;Acc:HGNC:13447]	chr12	46183063	46270017	-1	q13.11	39.96	protein_coding	10015
< 1e-07	< 1e-07	595.3	1412.83	2.37331	224579_at	SLC38A1	ENSG00000111371	solute carrier family 38 member 1 [Source:HGNC Symbol;Acc:HGNC:13447]	chr12	46183063	46270017	-1	q13.11	39.96	protein_coding	10015
0.0032323	0.00992	23.66	8.09	0.341927	220276_at	RERGL	ENSG00000111404	RERG like [Source:HGNC Symbol;Acc:HGNC:26213]	chr12	18080869	18320107	-1	p12.3	35.03	protein_coding	1549
8.47e-05	0.000471	61.83	141.95	2.29581	234983_at	SPRING1	ENSG00000111412	SREBF pathway regulator in golgi 1 [Source:HGNC Symbol;Acc:HGNC:26128]	chr12	116710171	116738070	-1	q24.22	44.26	protein_coding	8678
0.0053286	0.015	69.06	161.5	2.33855	204254_s_at	VDR	ENSG00000111424	vitamin D receptor [Source:HGNC Symbol;Acc:HGNC:12679]	chr12	47841537	47943048	-1	q13.11	47.72	protein_coding	5674
0.0090158	0.0232	6.75	9.57	1.41778	204255_s_at	VDR	ENSG00000111424	vitamin D receptor [Source:HGNC Symbol;Acc:HGNC:12679]	chr12	47841537	47943048	-1	q13.11	47.72	protein_coding	5674
0.0001151	0.000616	38.29	18.24	0.476365	207346_at	STX2	ENSG00000111450	syntaxin 2 [Source:HGNC Symbol;Acc:HGNC:3403]	chr12	130789600	130839266	-1	q24.33	45.87	protein_coding	3723
< 1e-07	< 1e-07	194.47	41.38	0.212783	213434_at	STX2	ENSG00000111450	syntaxin 2 [Source:HGNC Symbol;Acc:HGNC:3403]	chr12	130789600	130839266	-1	q24.33	45.87	protein_coding	3723
0.0075355	0.02	18.78	12.52	0.666667	232267_at	ADGRD1	ENSG00000111452	adhesion G protein-coupled receptor D1 [Source:HGNC Symbol;Acc:HGNC:19893]	chr12	130953907	131141469	1	q24.33	51.87	protein_coding	14718
5.09e-05	0.000307	27.13	57.77	2.12938	222386_s_at	COPZ1	ENSG00000111481	COPI coat complex subunit zeta 1 [Source:HGNC Symbol;Acc:HGNC:2243]	chr12	54301202	54351846	1	q13.13	46.59	protein_coding	3898
7e-07	8.64e-06	114.47	246.87	2.15663	207483_s_at	CAND1	ENSG00000111530	cullin associated and neddylation dissociated 1 [Source:HGNC Symbol;Acc:HGNC:30688]	chr12	67269358	67319953	1	q14.3	36.87	protein_coding	13580
6.9e-06	5.76e-05	247.36	510.44	2.06355	208839_s_at	CAND1	ENSG00000111530	cullin associated and neddylation dissociated 1 [Source:HGNC Symbol;Acc:HGNC:30688]	chr12	67269358	67319953	1	q14.3	36.87	protein_coding	13580
0.0024166	0.0078	237.02	398.56	1.68155	208838_at	CAND1	ENSG00000111530	cullin associated and neddylation dissociated 1 [Source:HGNC Symbol;Acc:HGNC:30688]	chr12	67269358	67319953	1	q14.3	36.87	protein_coding	13580
0.0059584	0.0165	158.43	88.26	0.557091	213761_at	MDM1	ENSG00000111554	Mdm1 nuclear protein [Source:HGNC Symbol;Acc:HGNC:29917]	chr12	68272443	68332381	-1	q15	38.66	protein_coding	6551
6.65e-05	0.000387	579.92	1161.64	2.0031	218768_at	NUP107	ENSG00000111581	nucleoporin 107 [Source:HGNC Symbol;Acc:HGNC:29914]	chr12	68686951	68745809	1	q15	39.25	protein_coding	8103
< 1e-07	< 1e-07	49.36	262.66	5.32131	203046_s_at	TIMELESS	ENSG00000111602	timeless circadian regulator [Source:HGNC Symbol;Acc:HGNC:11813]	chr12	56416363	56449426	-1	q13.3	46.65	protein_coding	5851
0.0038588	0.0115	10.49	15.64	1.49094	202470_s_at	CPSF6	ENSG00000111605	cleavage and polyadenylation specific factor 6 [Source:HGNC Symbol;Acc:HGNC:13871]	chr12	69239569	69274358	1	q15	35.75	protein_coding	8050
3.15e-05	0.000207	86.1	171.1	1.98722	223086_x_at	MRPL51	ENSG00000111639	mitochondrial ribosomal protein L51 [Source:HGNC Symbol;Acc:HGNC:14044]	chr12	6491886	6493841	-1	p13.31	48.72	protein_coding	1388
< 1e-07	1.6e-06	18.28	44.51	2.4349	224334_s_at	MRPL51	ENSG00000111639	mitochondrial ribosomal protein L51 [Source:HGNC Symbol;Acc:HGNC:14044]	chr12	6491886	6493841	-1	p13.31	48.72	protein_coding	1388
1.3e-06	1.45e-05	171.26	523.7	3.05792	AFFX-HUMGAPDH/M33197_5_at	GAPDH	ENSG00000111640	glyceraldehyde-3-phosphate dehydrogenase [Source:HGNC Symbol;Acc:HGNC:4141]	chr12	6534512	6538374	1	p13.31	59.98	protein_coding	2396
0.0001049	0.00057	450.23	919.79	2.04293	AFFX-HUMGAPDH/M33197_M_at	GAPDH	ENSG00000111640	glyceraldehyde-3-phosphate dehydrogenase [Source:HGNC Symbol;Acc:HGNC:4141]	chr12	6534512	6538374	1	p13.31	59.98	protein_coding	2396
0.0003642	0.00162	660.34	1160.62	1.75761	217398_x_at	GAPDH	ENSG00000111640	glyceraldehyde-3-phosphate dehydrogenase [Source:HGNC Symbol;Acc:HGNC:4141]	chr12	6534512	6538374	1	p13.31	59.98	protein_coding	2396
0.0004792	0.00203	836.59	1395.14	1.66765	212581_x_at	GAPDH	ENSG00000111640	glyceraldehyde-3-phosphate dehydrogenase [Source:HGNC Symbol;Acc:HGNC:4141]	chr12	6534512	6538374	1	p13.31	59.98	protein_coding	2396
0.0004858	0.00205	870.73	1471.91	1.69043	213453_x_at	GAPDH	ENSG00000111640	glyceraldehyde-3-phosphate dehydrogenase [Source:HGNC Symbol;Acc:HGNC:4141]	chr12	6534512	6538374	1	p13.31	59.98	protein_coding	2396
0.0082465	0.0215	31.24	48	1.53649	214427_at	NOP2	ENSG00000111641	NOP2 nucleolar protein [Source:HGNC Symbol;Acc:HGNC:7867]	chr12	6556863	6568691	-1	p13.31	49.45	protein_coding	4687
7e-07	8.64e-06	11.83	21.88	1.84954	218234_at	ING4	ENSG00000111653	inhibitor of growth family member 4 [Source:HGNC Symbol;Acc:HGNC:19423]	chr12	6650301	6663142	-1	p13.31	47.76	protein_coding	2709
1.6e-06	1.73e-05	25.97	49.38	1.90142	48825_at	ING4	ENSG00000111653	inhibitor of growth family member 4 [Source:HGNC Symbol;Acc:HGNC:19423]	chr12	6650301	6663142	-1	p13.31	47.76	protein_coding	2709
< 1e-07	< 1e-07	9.53	34.72	3.64323	223307_at	CDCA3	ENSG00000111665	cell division cycle associated 3 [Source:HGNC Symbol;Acc:HGNC:14624]	chr12	6844793	6851292	-1	p13.31	51.6	protein_coding	4879
< 1e-07	< 1e-07	5.46	16.88	3.09158	221436_s_at	CDCA3	ENSG00000111665	cell division cycle associated 3 [Source:HGNC Symbol;Acc:HGNC:14624]	chr12	6844793	6851292	-1	p13.31	51.6	protein_coding	4879
0.0041671	0.0122	14.46	7.39	0.511065	1559739_at	CHPT1	ENSG00000111666	choline phosphotransferase 1 [Source:HGNC Symbol;Acc:HGNC:17852]	chr12	101696947	101744140	1	q23.2	38.42	protein_coding	5991
6.1e-06	5.2e-05	135.06	271.95	2.01355	213011_s_at	TPI1	ENSG00000111669	triosephosphate isomerase 1 [Source:HGNC Symbol;Acc:HGNC:12009]	chr12	6867119	6870948	1	p13.31	59.16	protein_coding	2700
0.0001208	0.000641	184.53	333.72	1.80849	200822_x_at	TPI1	ENSG00000111669	triosephosphate isomerase 1 [Source:HGNC Symbol;Acc:HGNC:12009]	chr12	6867119	6870948	1	p13.31	59.16	protein_coding	2700
0.0015315	0.00532	417.07	635.69	1.52418	212959_s_at	GNPTAB	ENSG00000111670	N-acetylglucosamine-1-phosphate transferase subunits alpha and beta [Source:HGNC Symbol;Acc:HGNC:29670]	chr12	101745499	101830959	-1	q23.2	40.95	protein_coding	9774
0.0023419	0.0076	5.29	16.63	3.14367	206354_at	SLCO1B3	ENSG00000111700	solute carrier organic anion transporter family member 1B3 [Source:HGNC Symbol;Acc:HGNC:10961]	chr12	20810702	20916911	1	p12.2	35.9	protein_coding	3542
< 1e-07	< 1e-07	344.65	92.52	0.268446	220184_at	NANOG	ENSG00000111704	Nanog homeobox [Source:HGNC Symbol;Acc:HGNC:20857]	chr12	7787794	7799146	1	p13.31	44.05	protein_coding	5392
< 1e-07	1.6e-06	62.9	249.85	3.97218	218193_s_at	GOLT1B	ENSG00000111711	golgi transport 1B [Source:HGNC Symbol;Acc:HGNC:20175]	chr12	21501781	21518408	1	p12.1	35.99	protein_coding	3789
< 1e-07	1.6e-06	158.01	311.33	1.97032	222552_at	GOLT1B	ENSG00000111711	golgi transport 1B [Source:HGNC Symbol;Acc:HGNC:20175]	chr12	21501781	21518408	1	p12.1	35.99	protein_coding	3789
2.3e-06	2.34e-05	485.52	1163.58	2.39656	201030_x_at	LDHB	ENSG00000111716	lactate dehydrogenase B [Source:HGNC Symbol;Acc:HGNC:6541]	chr12	21635342	21757857	-1	p12.1	38.01	protein_coding	2983
4e-06	3.68e-05	504.52	1155.11	2.28952	213564_x_at	LDHB	ENSG00000111716	lactate dehydrogenase B [Source:HGNC Symbol;Acc:HGNC:6541]	chr12	21635342	21757857	-1	p12.1	38.01	protein_coding	2983
8.52e-05	0.000474	84.64	38.35	0.453095	235264_at	HCFC2	ENSG00000111727	host cell factor C2 [Source:HGNC Symbol;Acc:HGNC:24972]	chr12	104064531	104106524	1	q23.3	37.22	protein_coding	6699
< 1e-07	< 1e-07	759.06	325.28	0.42853	218338_at	PHC1	ENSG00000111752	polyhomeotic homolog 1 [Source:HGNC Symbol;Acc:HGNC:3182]	chr12	8913896	8941467	1	p13.31	44.13	protein_coding	6134
0.0043689	0.0127	292.51	411.64	1.40727	200925_at	COX6A1	ENSG00000111775	cytochrome c oxidase subunit 6A1 [Source:HGNC Symbol;Acc:HGNC:2277]	chr12	120438090	120440737	1	q24.31	48.26	protein_coding	1339
0.0004851	0.00205	14.64	9.11	0.622268	229637_at	RIC8B	ENSG00000111785	RIC8 guanine nucleotide exchange factor B [Source:HGNC Symbol;Acc:HGNC:25555]	chr12	106774621	106889316	1	q23.3	38.47	protein_coding	7769
0.0004628	0.00197	8.99	17.12	1.90434	1556283_s_at	FGFR1OP2	ENSG00000111790	FGFR1 oncogene partner 2 [Source:HGNC Symbol;Acc:HGNC:23098]	chr12	26938470	26966650	1	p11.23	35.89	protein_coding	5884
2.3e-06	2.34e-05	288.58	141.28	0.48957	225704_at	FBRSL1	ENSG00000112787	fibrosin like 1 [Source:HGNC Symbol;Acc:HGNC:29308]	chr12	132489551	132585188	1	q24.33	62.75	protein_coding	9393
< 1e-07	< 1e-07	163.06	15.88	0.0973875	220168_at	CFAP94	ENSG00000118307	cilia and flagella associated protein 94 [Source:HGNC Symbol;Acc:HGNC:29599]	chr12	25108289	25195162	-1	p12.1	38.18	protein_coding	3126
0.0002521	0.00119	107.83	24.88	0.230734	231259_s_at	CCND2	ENSG00000118971	cyclin D2 [Source:HGNC Symbol;Acc:HGNC:1583]	chr12	4269771	4305353	1	p13.32	50.21	protein_coding	7988
< 1e-07	< 1e-07	990.24	395.01	0.398903	200953_s_at	CCND2	ENSG00000118971	cyclin D2 [Source:HGNC Symbol;Acc:HGNC:1583]	chr12	4269771	4305353	1	p13.32	50.21	protein_coding	7988
0.0001413	0.00073	31.08	53.97	1.73649	224521_s_at	CCDC77	ENSG00000120647	coiled-coil domain containing 77 [Source:HGNC Symbol;Acc:HGNC:28203]	chr12	389273	442642	1	p13.33	43.8	protein_coding	3550
2e-07	2.96e-06	8.21	26.96	3.2838	209753_s_at	TMPO	ENSG00000120802	thymopoietin [Source:HGNC Symbol;Acc:HGNC:11875]	chr12	98515579	98550351	1	q23.1	39.69	protein_coding	8498
5.3e-06	4.62e-05	436.97	990.21	2.26608	224944_at	TMPO	ENSG00000120802	thymopoietin [Source:HGNC Symbol;Acc:HGNC:11875]	chr12	98515579	98550351	1	q23.1	39.69	protein_coding	8498
5.77e-05	0.000342	52.87	148.56	2.80991	203432_at	TMPO	ENSG00000120802	thymopoietin [Source:HGNC Symbol;Acc:HGNC:11875]	chr12	98515579	98550351	1	q23.1	39.69	protein_coding	8498
0.0008193	0.00318	14.1	37.49	2.65887	209754_s_at	TMPO	ENSG00000120802	thymopoietin [Source:HGNC Symbol;Acc:HGNC:11875]	chr12	98515579	98550351	1	q23.1	39.69	protein_coding	8498
0.0002107	0.00102	457.01	259.59	0.568018	201658_at	ARL1	ENSG00000120805	ADP ribosylation factor like GTPase 1 [Source:HGNC Symbol;Acc:HGNC:692]	chr12	101393116	101407772	-1	q23.2	39.41	protein_coding	4935
0.0003424	0.00154	175.3	364.25	2.07787	201659_s_at	ARL1	ENSG00000120805	ADP ribosylation factor like GTPase 1 [Source:HGNC Symbol;Acc:HGNC:692]	chr12	101393116	101407772	-1	q23.2	39.41	protein_coding	4935
2.66e-05	0.000179	76.11	18.1	0.237814	203373_at	SOCS2	ENSG00000120833	suppressor of cytokine signaling 2 [Source:HGNC Symbol;Acc:HGNC:19382]	chr12	93569814	93583487	1	q22	47.34	protein_coding	6477
0.000774	0.00303	30.66	9.84	0.320939	232539_at	SOCS2	ENSG00000120833	suppressor of cytokine signaling 2 [Source:HGNC Symbol;Acc:HGNC:19382]	chr12	93569814	93583487	1	q22	47.34	protein_coding	6477
0.0079978	0.021	11.66	6.52	0.559177	203372_s_at	SOCS2	ENSG00000120833	suppressor of cytokine signaling 2 [Source:HGNC Symbol;Acc:HGNC:19382]	chr12	93569814	93583487	1	q22	47.34	protein_coding	6477
0.0009678	0.00365	27.27	48.57	1.78108	218129_s_at	NFYB	ENSG00000120837	nuclear transcription factor Y subunit beta [Source:HGNC Symbol;Acc:HGNC:7805]	chr12	104117086	104138241	-1	q23.3	39.11	protein_coding	4899
0.0001427	0.000736	41.57	108.57	2.61174	218454_at	PLBD1	ENSG00000121316	phospholipase B domain containing 1 [Source:HGNC Symbol;Acc:HGNC:26215]	chr12	14503661	14567883	-1	p13.1	40.56	protein_coding	2375
0.004111	0.0121	253.73	117.91	0.464707	230072_at	TBC1D15	ENSG00000121749	TBC1 domain family member 15 [Source:HGNC Symbol;Acc:HGNC:25694]	chr12	71839707	71927248	1	q21.1	37.01	protein_coding	8227
0.0043829	0.0128	153.47	246.58	1.6067	218268_at	TBC1D15	ENSG00000121749	TBC1 domain family member 15 [Source:HGNC Symbol;Acc:HGNC:25694]	chr12	71839707	71927248	1	q21.1	37.01	protein_coding	8227
9e-07	1.07e-05	74.02	35.29	0.476763	206019_at	RBM19	ENSG00000122965	RNA binding motif protein 19 [Source:HGNC Symbol;Acc:HGNC:29098]	chr12	113816738	113966325	-1	q24.21	50.43	protein_coding	5866
< 1e-07	< 1e-07	9.13	29.68	3.25082	212801_at	CIT	ENSG00000122966	citron rho-interacting serine/threonine kinase [Source:HGNC Symbol;Acc:HGNC:1985]	chr12	119685791	119877320	-1	q24.23	43.74	protein_coding	28605
5.8e-06	4.98e-05	49.93	22.74	0.455438	219372_at	IFT81	ENSG00000122970	intraflagellar transport 81 [Source:HGNC Symbol;Acc:HGNC:14313]	chr12	110124335	110218793	1	q24.11	39.91	protein_coding	7001
4e-07	5.38e-06	27.63	13.59	0.491857	224433_s_at	DDX54	ENSG00000123064	DEAD-box helicase 54 [Source:HGNC Symbol;Acc:HGNC:20084]	chr12	113157173	113185479	-1	q24.13	54.07	protein_coding	5065
< 1e-07	< 1e-07	65.67	20.06	0.305467	219111_s_at	DDX54	ENSG00000123064	DEAD-box helicase 54 [Source:HGNC Symbol;Acc:HGNC:20084]	chr12	113157173	113185479	-1	q24.13	54.07	protein_coding	5065
0.0002946	0.00135	49.94	22.99	0.460352	211360_s_at	ITPR2	ENSG00000123104	inositol 1,4,5-trisphosphate receptor type 2 [Source:HGNC Symbol;Acc:HGNC:6181]	chr12	26335352	26833194	-1	p11.23	38.26	protein_coding	13909
0.000336	0.00151	78.08	37.34	0.478227	202660_at	ITPR2	ENSG00000123104	inositol 1,4,5-trisphosphate receptor type 2 [Source:HGNC Symbol;Acc:HGNC:6181]	chr12	26335352	26833194	-1	p11.23	38.26	protein_coding	13909
0.000539	0.00223	32.97	17.5	0.530786	202662_s_at	ITPR2	ENSG00000123104	inositol 1,4,5-trisphosphate receptor type 2 [Source:HGNC Symbol;Acc:HGNC:6181]	chr12	26335352	26833194	-1	p11.23	38.26	protein_coding	13909
0.007945	0.0209	28.21	15.71	0.556895	202661_at	ITPR2	ENSG00000123104	inositol 1,4,5-trisphosphate receptor type 2 [Source:HGNC Symbol;Acc:HGNC:6181]	chr12	26335352	26833194	-1	p11.23	38.26	protein_coding	13909
0.0044482	0.0129	83.41	175.14	2.09975	1558233_s_at	ATF1	ENSG00000123268	activating transcription factor 1 [Source:HGNC Symbol;Acc:HGNC:783]	chr12	50763710	50821162	1	q13.12	41.92	protein_coding	2830
0.0047119	0.0135	322.75	486.04	1.50593	222103_at	ATF1	ENSG00000123268	activating transcription factor 1 [Source:HGNC Symbol;Acc:HGNC:783]	chr12	50763710	50821162	1	q13.12	41.92	protein_coding	2830
0.0033119	0.0101	1094.61	718.27	0.656188	204574_s_at	MMP19	ENSG00000123342	matrix metallopeptidase 19 [Source:HGNC Symbol;Acc:HGNC:7165]	chr12	55835433	55842966	-1	q13.2	51.02	protein_coding	4672
0.0011657	0.00424	43.22	17.71	0.409764	202340_x_at	NR4A1	ENSG00000123358	nuclear receptor subfamily 4 group A member 1 [Source:HGNC Symbol;Acc:HGNC:7980]	chr12	52022832	52059507	1	q13.13	56.01	protein_coding	7295
0.001974	0.00658	21.91	10.65	0.486079	211143_x_at	NR4A1	ENSG00000123358	nuclear receptor subfamily 4 group A member 1 [Source:HGNC Symbol;Acc:HGNC:7980]	chr12	52022832	52059507	1	q13.13	56.01	protein_coding	7295
[truncated: 7,399 more rows]

## Sheet: GSE14001
Parametric p-value	FDR	Normal (1)	Low grade (2)	High grade (3)	ProbeSet	Pairwise significant	Gene_name	Gene_ID	Gene_description	Chromosome_scaffold_name	Gene_start_bp	Gene_end_bp	Strand	Karyotype_band	Gene_GC_content	Gene_type	Gene_Length
[truncated: 6,451 more rows]

[truncated: 20 more sheets: GSE14407, GSE18520, GSE26712, GSE29450, GSE38666, GSE40595, GSE52037, GSE54388, GSE66957, GSE119054, GSE137238, GEPIA2, GSE23391, GSE27651, Wang 2016, GSE74448, GSE6008, GSE29220, GSE17308, GSE190688]
