# Supplementary material for: Identification of lncRNAs Deregulated in Epithelial Ovarian Cancer Based on a Gene Expression Profiling Meta-Analysis
Source: Int J Mol Sci. 2023 Jun 28;24(13):10798. doi: 10.3390/ijms241310798 (PMC10341812; doi:10.3390/ijms241310798)
Supplement: Supplementary file 1 [file ijms-24-10798-s001.zip › Supplementary Table S3.xlsx]

## Sheet: STS3 Title
	Supplementary Table S3.- LncRNAs considered of ambiguous clinical significance.

## Sheet: Diagnostic
Gene_ID	Gene_description	Chromosome_scaffold_name	Gene_start_bp	Gene_end_bp	Strand	Karyotype_band	Gene_name	Gene_GC_content	Gene_type	# studies up	# studies down
ENSG00000229807	X inactive specific transcript [Source:HGNC Symbol;Acc:HGNC:12810]	chrX	73820649	73852723	-1	q13.2	XIST	39.78	lncRNA	1	12
ENSG00000215386	mir-99a-let-7c cluster host gene [Source:HGNC Symbol;Acc:HGNC:1274]	chr21	15928296	16645467	1	q21.1	MIR99AHG	35.52	lncRNA	1	12
ENSG00000257621	PSMA3 antisense RNA 1 [Source:HGNC Symbol;Acc:HGNC:26445]	chr14	58265365	58298134	-1	q23.1	PSMA3-AS1	38.57	lncRNA	2	11
ENSG00000248019	FAM13A antisense RNA 1 [Source:HGNC Symbol;Acc:HGNC:19370]	chr4	88709298	88730103	1	q22.1	FAM13A-AS1	39.45	lncRNA	1	11
ENSG00000183242	WT1 antisense RNA [Source:HGNC Symbol;Acc:HGNC:18135]	chr11	32435518	32458769	1	p13	WT1-AS	44.72	lncRNA	2	10
ENSG00000189223	PAX8 antisense RNA 1 [Source:HGNC Symbol;Acc:HGNC:49271]	chr2	113211421	113276581	1	q14.1	PAX8-AS1	49.01	lncRNA	1	10
ENSG00000267272	long intergenic non-protein coding RNA 1140 [Source:HGNC Symbol;Acc:HGNC:27922]	chr1	87129765	87169198	1	p22.3	LINC01140	45.03	lncRNA	1	10
ENSG00000281183	NPTN intronic transcript 1 [Source:HGNC Symbol;Acc:HGNC:45091]	chr15	73567012	73569294	-1	q24.1	NPTN-IT1	44.81	lncRNA	1	10
ENSG00000246223	long intergenic non-protein coding RNA 1550 [Source:HGNC Symbol;Acc:HGNC:20111]	chr14	97924637	97978124	-1	q32.2	LINC01550	43.16	lncRNA	1	10
ENSG00000247556	OIP5 antisense RNA 1 [Source:HGNC Symbol;Acc:HGNC:43563]	chr15	41283990	41309737	1	q15.1	OIP5-AS1	41.46	lncRNA	3	9
ENSG00000224259	long intergenic non-protein coding RNA 1133 [Source:HGNC Symbol;Acc:HGNC:49447]	chr1	159958035	159984750	1	q23.2	LINC01133	45.81	lncRNA	2	9
ENSG00000163364	long intergenic non-protein coding RNA 1116 [Source:HGNC Symbol;Acc:HGNC:49259]	chr2	176629572	176637931	-1	q31.1	LINC01116	38.98	lncRNA	2	9
ENSG00000214922	HLA-F antisense RNA 1 [Source:HGNC Symbol;Acc:HGNC:26645]	chr6	29726601	29749049	-1	p22.1	HLA-F-AS1	45.94	lncRNA	1	9
ENSG00000182165	TP53 target 1 [Source:HGNC Symbol;Acc:HGNC:17026]	chr7	87322943	87345528	-1	q21.12	TP53TG1	38.89	lncRNA	1	9
ENSG00000225465	RFPL1 antisense RNA 1 [Source:HGNC Symbol;Acc:HGNC:9978]	chr22	29436534	29478868	-1	q12.2	RFPL1S	49.58	lncRNA	1	9
ENSG00000267454	ZNF582 divergent transcript [Source:HGNC Symbol;Acc:HGNC:25213]	chr19	56393656	56399172	1	q13.43	ZNF582-DT	45.46	lncRNA	1	9
ENSG00000247271	ZBED5 antisense RNA 1 [Source:HGNC Symbol;Acc:HGNC:48646]	chr11	10858179	10908972	1	p15.4	ZBED5-AS1	40.64	lncRNA	1	9
ENSG00000250742	long intergenic non-protein coding RNA 2381 [Source:HGNC Symbol;Acc:HGNC:53304]	chr12	54126082	54147485	1	q13.13	LINC02381	52.37	lncRNA	1	9
ENSG00000179523	EIF3J divergent transcript [Source:HGNC Symbol;Acc:HGNC:48616]	chr15	44527257	44537046	-1	q21.1	EIF3J-DT	44.47	lncRNA	1	9
ENSG00000224020	MIR181A2 host gene [Source:HGNC Symbol;Acc:HGNC:37188]	chr9	124658467	124698631	1	q33.3	MIR181A2HG	38.12	lncRNA	3	8
ENSG00000251562	metastasis associated lung adenocarcinoma transcript 1 [Source:HGNC Symbol;Acc:HGNC:29665]	chr11	65497688	65506516	1	q13.1	MALAT1	40.56	lncRNA	3	8
ENSG00000223745	CCDC18 antisense RNA 1 [Source:HGNC Symbol;Acc:HGNC:52262]	chr1	93262186	93346025	-1	p22.1	CCDC18-AS1	39.07	lncRNA	2	8
ENSG00000241769	long intergenic non-protein coding RNA 893 [Source:HGNC Symbol;Acc:HGNC:44265]	chrX	149527591	149540959	-1	q28	LINC00893	52.08	lncRNA	2	8
ENSG00000179818	PCBP1 antisense RNA 1 [Source:HGNC Symbol;Acc:HGNC:42948]	chr2	69960104	70103220	-1	p13.3	PCBP1-AS1	45.99	lncRNA	2	8
ENSG00000273033	long intergenic non-protein coding RNA 2035 [Source:HGNC Symbol;Acc:HGNC:52875]	chr3	122886941	122892416	1	q21.1	LINC02035	43.74	lncRNA	1	8
ENSG00000228794	long intergenic non-protein coding RNA 1128 [Source:HGNC Symbol;Acc:HGNC:49377]	chr1	825138	859446	1	p36.33	LINC01128	46.54	lncRNA	1	8
ENSG00000264247	ZNF407 antisense RNA 1 [Source:HGNC Symbol;Acc:HGNC:44331]	chr18	74590317	74598885	-1	q22.3	ZNF407-AS1	43.54	lncRNA	1	8
ENSG00000260941	long intergenic non-protein coding RNA 622 [Source:HGNC Symbol;Acc:HGNC:44251]	chr1	119597702	119599271	-1	p12	LINC00622	37.71	lncRNA	1	8
ENSG00000278970	hepatocellular carcinoma up-regulated EZH2-associated long non-coding RNA [Source:HGNC Symbol;Acc:HGNC:45049]	chr5	180826871	180831605	-1	q35.3	HEIH	50.45	lncRNA	1	8
ENSG00000281649	endogenous Bornavirus like nucleoprotein 3, pseudogene [Source:HGNC Symbol;Acc:HGNC:50682]	chr9	37079645	37090928	1	p13.2	EBLN3P	38.97	lncRNA	1	8
ENSG00000177640	cancer susceptibility 2 [Source:HGNC Symbol;Acc:HGNC:22933]	chr10	118046279	118210158	1	q26.11	CASC2	38.26	lncRNA	3	7
ENSG00000230590	FTX transcript, XIST regulator [Source:HGNC Symbol;Acc:HGNC:37190]	chrX	73940435	74293574	-1	q13.2	FTX	39.58	lncRNA	2	7
ENSG00000214548	maternally expressed 3 [Source:HGNC Symbol;Acc:HGNC:14575]	chr14	100779410	100861031	1	q32.2	MEG3	51.68	lncRNA	2	7
ENSG00000251432	long intergenic non-protein coding RNA 2615 [Source:HGNC Symbol;Acc:HGNC:53402]	chr4	128292751	128519398	1	q28.2	LINC02615	40.23	lncRNA	1	7
ENSG00000263327	TAPT1 antisense RNA 1 (head to head) [Source:HGNC Symbol;Acc:HGNC:26832]	chr4	16226685	16320140	1	p15.32	TAPT1-AS1	40.54	lncRNA	1	7
ENSG00000280798	long intergenic non-protein coding RNA 294 [Source:HGNC Symbol;Acc:HGNC:27456]	chr11	33076149	33079454	1	p13	LINC00294	45.1	lncRNA	1	7
ENSG00000231607	deleted in lymphocytic leukemia 2 [Source:HGNC Symbol;Acc:HGNC:13748]	chr13	49956670	50125720	-1	q14.2	DLEU2	38.87	lncRNA	7	6
ENSG00000204261	PSMB8 antisense RNA 1 (head to head) [Source:HGNC Symbol;Acc:HGNC:39758]	chr6	32844078	32846500	1	p21.32	PSMB8-AS1	52.21	lncRNA	5	6
ENSG00000228315	GUSB pseudogene 11 [Source:HGNC Symbol;Acc:HGNC:42325]	chr22	23638487	23717356	-1	q11.23	GUSBP11	50.35	lncRNA	4	6
ENSG00000206337	HLA complex P5 [Source:HGNC Symbol;Acc:HGNC:21659]	chr6	31463170	31478936	1	p21.33	HCP5	49.39	lncRNA	4	6
ENSG00000224660	SH3BP5 antisense RNA 1 [Source:HGNC Symbol;Acc:HGNC:44501]	chr3	15254184	15264515	1	p25.1	SH3BP5-AS1	45.54	lncRNA	2	6
ENSG00000198711	SSBP3 antisense RNA 1 [Source:HGNC Symbol;Acc:HGNC:32328]	chr1	54236440	54239063	1	p32.3	SSBP3-AS1	49.77	lncRNA	2	6
ENSG00000229152	ANKRD10 intronic transcript 1 [Source:HGNC Symbol;Acc:HGNC:39891]	chr13	110894639	110899172	-1	q34	ANKRD10-IT1	38.6	lncRNA	2	6
ENSG00000223768	long intergenic non-protein coding RNA 205 [Source:HGNC Symbol;Acc:HGNC:16420]	chr21	45288050	45297806	1	q22.3	LINC00205	54.34	lncRNA	2	6
ENSG00000266904	long intergenic non-protein coding RNA 663 [Source:HGNC Symbol;Acc:HGNC:28609]	chr19	19757366	19776423	-1	p13.11	LINC00663	44.24	lncRNA	2	6
ENSG00000249669	cardiac mesoderm enhancer-associated non-coding RNA [Source:HGNC Symbol;Acc:HGNC:42872]	chr5	149406689	149432835	1	q32	CARMN	51.97	lncRNA	2	6
ENSG00000225484	NUTM2B antisense RNA 1 [Source:HGNC Symbol;Acc:HGNC:51204]	chr10	79661394	79826594	-1	q22.3	NUTM2B-AS1	39.62	lncRNA	1	6
ENSG00000233429	HOXA transcript antisense RNA, myeloid-specific 1 [Source:HGNC Symbol;Acc:HGNC:37117]	chr7	27095647	27100265	1	p15.2	HOTAIRM1	53.93	lncRNA	1	6
ENSG00000236088	COX10 antisense RNA 1 [Source:HGNC Symbol;Acc:HGNC:38873]	chr17	13755574	14069495	-1	p12	COX10-AS1	41	lncRNA	1	6
ENSG00000232995	regulator of G protein signaling 5 [Source:NCBI gene (formerly Entrezgene);Acc:8490]	chr1	163244505	163321894	-1	q23.3	RGS5	37.85	lncRNA	1	6
ENSG00000249307	long intergenic non-protein coding RNA 1088 [Source:HGNC Symbol;Acc:HGNC:49148]	chr4	78939485	79309673	1	q21.21	LINC01088	36.97	lncRNA	1	6
ENSG00000245571	FAM111A divergent transcript [Source:HGNC Symbol;Acc:HGNC:53752]	chr11	59130133	59143015	-1	q12.1	FAM111A-DT	42.04	lncRNA	1	6
ENSG00000203706	SERTAD4 antisense RNA 1 [Source:HGNC Symbol;Acc:HGNC:32019]	chr1	210231456	210234047	-1	q32.2	SERTAD4-AS1	58.06	lncRNA	1	6
ENSG00000229847	EMX2 opposite strand/antisense RNA [Source:HGNC Symbol;Acc:HGNC:18511]	chr10	117473215	117545068	-1	q26.11	EMX2OS	47.72	lncRNA	3	5
ENSG00000223749	MIR503 host gene [Source:HGNC Symbol;Acc:HGNC:28258]	chrX	134543119	134546642	-1	q26.3	MIR503HG	52.61	lncRNA	3	5
ENSG00000239653	PSMD6 antisense RNA 2 [Source:HGNC Symbol;Acc:HGNC:44125]	chr3	64004022	64012148	1	p14.1	PSMD6-AS2	38.82	lncRNA	3	5
ENSG00000253738	OTUD6B antisense RNA 1 (head to head) [Source:HGNC Symbol;Acc:HGNC:50466]	chr8	91059318	91070583	-1	q21.3	OTUD6B-AS1	35.85	lncRNA	2	5
ENSG00000238276	novel transcript	chr10	118241468	118267710	1	q26.11		42.04	lncRNA	2	5
ENSG00000232046	long intergenic non-protein coding RNA 1798 [Source:HGNC Symbol;Acc:HGNC:52588]	chr2	66574030	66731223	1	p14	LINC01798	39.07	lncRNA	2	5
ENSG00000236618	PITPNA antisense RNA 1 [Source:HGNC Symbol;Acc:HGNC:44116]	chr17	1516931	1518096	1	p13.3	PITPNA-AS1	51.63	lncRNA	1	5
ENSG00000245937	long intergenic non-protein coding RNA 1184 [Source:HGNC Symbol;Acc:HGNC:49565]	chr5	127939152	128083172	-1	q23.3	LINC01184	37.78	lncRNA	1	5
ENSG00000236778	INTS6 antisense RNA 1 [Source:HGNC Symbol;Acc:HGNC:42691]	chr13	51452364	51554678	1	q14.3	INTS6-AS1	40.16	lncRNA	1	5
ENSG00000265148	TSPOAP1, SUPT4H1 and RNF43 antisense RNA 1 [Source:HGNC Symbol;Acc:HGNC:44148]	chr17	58324472	58415766	1	q22	TSPOAP1-AS1	46.31	lncRNA	1	5
ENSG00000285410	GABPB1 intronic transcript [Source:HGNC Symbol;Acc:HGNC:25469]	chr15	50348936	50354861	-1	q21.2	GABPB1-IT1	41.31	lncRNA	1	5
ENSG00000179743	uncharacterized LOC729614 [Source:NCBI gene (formerly Entrezgene);Acc:729614]	chr1	15834474	15848147	-1	p36.21	FLJ37453	50.48	lncRNA	1	5
ENSG00000245532	nuclear paraspeckle assembly transcript 1 [Source:HGNC Symbol;Acc:HGNC:30815]	chr11	65422774	65445540	1	q13.1	NEAT1	44.06	lncRNA	4	4
ENSG00000226137	BAIAP2 divergent transcript [Source:HGNC Symbol;Acc:HGNC:44342]	chr17	81029130	81034881	-1	q25.3	BAIAP2-DT	59.08	lncRNA	4	4
ENSG00000196668	long intergenic non-protein coding RNA 173 [Source:HGNC Symbol;Acc:HGNC:33791]	chr12	116533422	116536518	1	q24.22	LINC00173	50.76	lncRNA	3	4
ENSG00000177133	PRDM16 divergent transcript [Source:HGNC Symbol;Acc:HGNC:48664]	chr1	3059615	3068437	-1	p36.32	PRDM16-DT	61.79	lncRNA	3	4
ENSG00000246090	novel transcript, antisense to ADH4, ADH6 & ADH1A	chr4	99088805	99301356	1	q23		38.91	lncRNA	3	4
ENSG00000215256	DHRS4 antisense RNA 1 [Source:HGNC Symbol;Acc:HGNC:23175]	chr14	23938219	24052555	-1	q11.2	DHRS4-AS1	44.12	lncRNA	2	4
ENSG00000231057	novel transcript	chr1	211675749	211690103	1	q32.3		45.91	lncRNA	2	4
ENSG00000236709	DAPK1 intronic transcript 1 [Source:HGNC Symbol;Acc:HGNC:43591]	chr9	87553454	87554459	1	q21.33	DAPK1-IT1	43.44	lncRNA	2	4
ENSG00000231889	TRAF3IP2 antisense RNA 1 [Source:HGNC Symbol;Acc:HGNC:40005]	chr6	111483511	111598302	1	q21	TRAF3IP2-AS1	41.83	lncRNA	2	4
ENSG00000231711	long intergenic non-protein coding RNA 899 [Source:HGNC Symbol;Acc:HGNC:48583]	chr22	46039907	46044853	-1	q13.31	LINC00899	48.64	lncRNA	2	4
ENSG00000237232	ZNF295 antisense RNA 1 [Source:HGNC Symbol;Acc:HGNC:23130]	chr21	42009194	42055130	1	q22.3	ZNF295-AS1	50.2	lncRNA	2	4
ENSG00000237298	TTN antisense RNA 1 [Source:HGNC Symbol;Acc:HGNC:44124]	chr2	178521183	178779963	1	q31.2	TTN-AS1	37.97	lncRNA	2	4
ENSG00000226235	LEMD1 antisense RNA 1 [Source:HGNC Symbol;Acc:HGNC:44132]	chr1	205373252	205387440	1	q32.1	LEMD1-AS1	44.6	lncRNA	2	4
ENSG00000251022	THAP9 antisense RNA 1 [Source:HGNC Symbol;Acc:HGNC:44172]	chr4	82893009	82900960	-1	q21.22	THAP9-AS1	39.31	lncRNA	2	4
ENSG00000258498	DIO3 opposite strand upstream RNA [Source:HGNC Symbol;Acc:HGNC:20348]	chr14	101552221	101560431	-1	q32.31	DIO3OS	58.65	lncRNA	2	4
ENSG00000175611	long intergenic non-protein coding RNA 476 [Source:HGNC Symbol;Acc:HGNC:27858]	chr9	95759231	95876049	-1	q22.32	LINC00476	42.25	lncRNA	2	4
ENSG00000198496	neighbor of BRCA1 lncRNA 2 [Source:HGNC Symbol;Acc:HGNC:20691]	chr17	43125551	43153671	1	q21.31	NBR2	47.53	lncRNA	1	4
ENSG00000250579	uncharacterized LOC101929176 [Source:NCBI gene (formerly Entrezgene);Acc:101929176]	chr5	5132101	5140119	-1	p15.32	CTD-2297D10.2	51.91	lncRNA	1	4
ENSG00000257337	novel transcript, antisense to TENC1 & EIF4B	chr12	53012884	53054450	-1	q13.13		47.06	lncRNA	1	4
ENSG00000260032	non-coding RNA activated by DNA damage [Source:HGNC Symbol;Acc:HGNC:44311]	chr20	36045618	36051018	-1	q11.23	NORAD	41.75	lncRNA	1	4
ENSG00000254531	uncharacterized LOC90024 [Source:NCBI gene (formerly Entrezgene);Acc:90024]	chr4	101347780	101348883	1	q24	FLJ20021	62.32	lncRNA	1	4
ENSG00000232160	RAP2C antisense RNA 1 [Source:HGNC Symbol;Acc:HGNC:40957]	chrX	132217053	132432862	1	q26.2	RAP2C-AS1	38.59	lncRNA	1	4
ENSG00000231721	long intergenic non-protein coding RNA, p53 induced transcript [Source:HGNC Symbol;Acc:HGNC:26885]	chr7	130938963	131110176	-1	q32.3	LINC-PINT	41.59	lncRNA	1	4
ENSG00000226891	long intergenic non-protein coding RNA 1359 [Source:HGNC Symbol;Acc:HGNC:50591]	chr1	64972225	65002489	-1	p31.3	LINC01359	42.17	lncRNA	1	4
ENSG00000247828	TMEM161B antisense RNA 1 [Source:HGNC Symbol;Acc:HGNC:43839]	chr5	88268891	88439337	1	q14.3	TMEM161B-AS1	37.29	lncRNA	1	4
ENSG00000261064	long intergenic non-protein coding RNA 2256 [Source:HGNC Symbol;Acc:HGNC:53157]	chr15	32536047	32587613	1	q13.3	LINC02256	39.03	lncRNA	1	4
ENSG00000248092	NNT antisense RNA 1 [Source:HGNC Symbol;Acc:HGNC:49005]	chr5	43571594	43603230	-1	p12	NNT-AS1	41.09	lncRNA	1	4
ENSG00000258730	ITPK1 antisense RNA 1 [Source:HGNC Symbol;Acc:HGNC:20132]	chr14	93067452	93072152	1	q32.12	ITPK1-AS1	49.56	lncRNA	1	4
ENSG00000240567	long intergenic non-protein coding RNA 2067 [Source:HGNC Symbol;Acc:HGNC:52913]	chr3	161426427	161448242	1	q26.1	LINC02067	38.51	lncRNA	1	4
ENSG00000280832	G-quadruplex forming sequence containing lncRNA [Source:HGNC Symbol;Acc:HGNC:48645]	chr11	126340889	126355587	-1	q24.2	GSEC	50.38	lncRNA	1	4
ENSG00000180139	ACTA2 antisense RNA 1 [Source:HGNC Symbol;Acc:HGNC:45169]	chr10	88932390	88940820	1	q23.31	ACTA2-AS1	43.42	lncRNA	1	4
ENSG00000225855	RUSC1 antisense RNA 1 [Source:HGNC Symbol;Acc:HGNC:26680]	chr1	155316863	155324176	-1	q22	RUSC1-AS1	56.39	lncRNA	6	3
ENSG00000212694	long intergenic non-protein coding RNA 1089 [Source:HGNC Symbol;Acc:HGNC:27886]	chr12	121795267	121803906	-1	q24.31	LINC01089	58.94	lncRNA	5	3
ENSG00000231074	HLA complex group 18 [Source:HGNC Symbol;Acc:HGNC:31337]	chr6	30286690	30327382	-1	p22.1	HCG18	42.85	lncRNA	5	3
ENSG00000254815	LMNTD2 antisense RNA 1 [Source:HGNC Symbol;Acc:HGNC:41204]	chr11	557595	560107	1	p15.5	LMNTD2-AS1	63.07	lncRNA	4	3
ENSG00000225930	long intergenic non-protein coding RNA 2249 [Source:HGNC Symbol;Acc:HGNC:32351]	chr15	30195809	30217552	1	q13.2	LINC02249	40.77	lncRNA	4	3
ENSG00000206573	THUMPD3 antisense RNA 1 [Source:HGNC Symbol;Acc:HGNC:44478]	chr3	9349689	9398579	-1	p25.3	THUMPD3-AS1	41.7	lncRNA	4	3
ENSG00000236256	DIAPH2 antisense RNA 1 [Source:HGNC Symbol;Acc:HGNC:16972]	chrX	97431286	97642589	-1	q21.33	DIAPH2-AS1	38.04	lncRNA	4	3
ENSG00000226711	family with sequence similarity 66 member C [Source:HGNC Symbol;Acc:HGNC:21644]	chr12	8180209	8216151	1	p13.31	FAM66C	42.24	lncRNA	3	3
ENSG00000236581	STARD13 antisense RNA [Source:HGNC Symbol;Acc:HGNC:40873]	chr13	33180401	33281584	1	q13.1	STARD13-AS	40.71	lncRNA	3	3
ENSG00000262001	DLGAP1 antisense RNA 2 [Source:HGNC Symbol;Acc:HGNC:28146]	chr18	3603000	3608336	1	p11.31	DLGAP1-AS2	42.98	lncRNA	3	3
ENSG00000181800	CELF2 antisense RNA 1 [Source:HGNC Symbol;Acc:HGNC:23515]	chr10	11316833	11319884	-1	p14	CELF2-AS1	46.72	lncRNA	2	3
ENSG00000236901	MIR600 host gene [Source:HGNC Symbol;Acc:HGNC:23642]	chr9	123109494	123115477	-1	q33.3	MIR600HG	53.98	lncRNA	2	3
ENSG00000255559	ZNF252P antisense RNA 1 [Source:HGNC Symbol;Acc:HGNC:27821]	chr8	145002811	145006046	1	q24.3	ZNF252P-AS1	48.67	lncRNA	2	3
ENSG00000251442	long intergenic non-protein coding RNA 1094 [Source:HGNC Symbol;Acc:HGNC:49219]	chr4	78638780	78683185	1	q21.21	LINC01094	39.7	lncRNA	2	3
ENSG00000249464	long intergenic non-protein coding RNA 1091 [Source:HGNC Symbol;Acc:HGNC:27721]	chr4	123539026	123962698	1	q28.1	LINC01091	37.67	lncRNA	2	3
ENSG00000231768	long intergenic non-protein coding RNA 1354 [Source:HGNC Symbol;Acc:HGNC:50581]	chr1	234527887	234531803	-1	q42.2	LINC01354	46	lncRNA	2	3
ENSG00000228340	MIR646 host gene [Source:HGNC Symbol;Acc:HGNC:27659]	chr20	60087826	60653784	1	q13.33	MIR646HG	43.06	lncRNA	2	3
ENSG00000235954	TTC28 antisense RNA 1 [Source:HGNC Symbol;Acc:HGNC:29336]	chr22	27919376	28008581	1	q12.1	TTC28-AS1	43.33	lncRNA	2	3
ENSG00000235706	DICER1 antisense RNA 1 [Source:HGNC Symbol;Acc:HGNC:43017]	chr14	95157645	95181475	1	q32.13	DICER1-AS1	43.06	lncRNA	2	3
ENSG00000233355	CHRM3 antisense RNA 2 [Source:HGNC Symbol;Acc:HGNC:43725]	chr1	239703381	239770130	-1	q43	CHRM3-AS2	37.5	lncRNA	2	3
ENSG00000187621	T cell leukemia/lymphoma 6 [Source:HGNC Symbol;Acc:HGNC:13463]	chr14	95650498	95679833	1	q32.13	TCL6	46.37	lncRNA	2	3
ENSG00000214145	long intergenic non-protein coding RNA 887 [Source:HGNC Symbol;Acc:HGNC:48574]	chr3	194296191	194322871	-1	q29	LINC00887	50.45	lncRNA	2	3
ENSG00000214783	RNA polymerase II subunit J4, pseudogene [Source:HGNC Symbol;Acc:HGNC:28195]	chr7	43940895	44019175	-1	p13	POLR2J4	51.23	lncRNA	2	3
ENSG00000276462	novel transcript	chr9	41100793	41119909	-1	p11.2		47.81	lncRNA	2	3
ENSG00000225470	JPX transcript, XIST activator [Source:HGNC Symbol;Acc:HGNC:37191]	chrX	73944182	74070408	1	q13.2	JPX	38.98	lncRNA	1	3
ENSG00000269696	ZNF470 divergent transcript [Source:HGNC Symbol;Acc:HGNC:55272]	chr19	56545566	56567411	-1	q13.43	ZNF470-DT	40.27	lncRNA	1	3
ENSG00000180422	long intergenic non-protein coding RNA 304 [Source:HGNC Symbol;Acc:HGNC:26713]	chr16	89159146	89164245	1	q24.3	LINC00304	59.35	lncRNA	1	3
ENSG00000206129	novel transcript	chr18	56003613	56191262	-1	q21.2		38.79	lncRNA	1	3
ENSG00000227540	DNAJC9 antisense RNA 1 [Source:NCBI gene (formerly Entrezgene);Acc:414245]	chr10	73252791	73254349	1	q22.2	DNAJC9-AS1	42.27	lncRNA	1	3
ENSG00000267254	ZNF790 antisense RNA 1 [Source:HGNC Symbol;Acc:HGNC:27617]	chr19	36797502	36831596	1	q13.12	ZNF790-AS1	40.63	lncRNA	1	3
ENSG00000265479	DTX2P1-UPK3BP1-PMS2P11 readthrough, transcribed pseudogene [Source:HGNC Symbol;Acc:HGNC:42360]	chr7	76959835	77043775	1	q11.23	DTX2P1-UPK3BP1-PMS2P11	50.85	lncRNA	1	3
ENSG00000166770	ZNF667 antisense RNA 1 (head to head) [Source:HGNC Symbol;Acc:HGNC:44321]	chr19	56477250	56504362	1	q13.43	ZNF667-AS1	43.23	lncRNA	1	3
ENSG00000197291	RAMP2 antisense RNA 1 [Source:HGNC Symbol;Acc:HGNC:44358]	chr17	42753914	42761257	-1	q21.2	RAMP2-AS1	49.8	lncRNA	1	3
ENSG00000223891	OSER1 divergent transcript [Source:HGNC Symbol;Acc:HGNC:48585]	chr20	44210907	44226027	1	q13.12	OSER1-DT	46.04	lncRNA	1	3
ENSG00000255100	novel transcript	chr11	76782581	76783062	-1	q13.5		50.41	lncRNA	1	3
ENSG00000248489	long intergenic non-protein coding RNA 2062 [Source:HGNC Symbol;Acc:HGNC:52907]	chr5	98929171	98995013	1	q21.1	LINC02062	39.81	lncRNA	1	3
ENSG00000251576	long intergenic non-protein coding RNA 1267 [Source:HGNC Symbol;Acc:HGNC:50320]	chr3	14348451	14352568	-1	p25.1	LINC01267	50.66	lncRNA	1	3
ENSG00000203709	MIR29B2 and MIR29C host gene [Source:HGNC Symbol;Acc:HGNC:32018]	chr1	207801518	207879115	-1	q32.2	MIR29B2CHG	47.66	lncRNA	1	3
ENSG00000245750	downregulated RNA in cancer, inhibitor of cell invasion and migration [Source:HGNC Symbol;Acc:HGNC:27082]	chr15	69462921	69843120	1	q23	DRAIC	46.45	lncRNA	1	3
ENSG00000243836	WDR86 antisense RNA 1 [Source:HGNC Symbol;Acc:HGNC:41186]	chr7	151409161	151413354	1	q36.1	WDR86-AS1	60.18	lncRNA	1	3
ENSG00000247796	novel transcript, antisense to MOCS2	chr5	53109816	53127673	1	q11.2		40.13	lncRNA	1	3
ENSG00000243319	FGF14 intronic transcript 1 [Source:HGNC Symbol;Acc:HGNC:42774]	chr13	102292327	102394519	-1	q33.1	FGF14-IT1	37.7	lncRNA	1	3
ENSG00000246985	SOCS2 antisense RNA 1 [Source:HGNC Symbol;Acc:HGNC:27054]	chr12	93542022	93571768	-1	q22	SOCS2-AS1	42.95	lncRNA	1	3
ENSG00000227954	TCF21 antisense RNA inducing promoter demethylation [Source:HGNC Symbol;Acc:HGNC:50506]	chr6	133502252	133892802	-1	q23.2	TARID	38.09	lncRNA	1	3
ENSG00000233184	novel transcript	chr1	101025844	101090513	1	p21.2		37.12	lncRNA	1	3
ENSG00000231993	EP300 antisense RNA 1 [Source:HGNC Symbol;Acc:HGNC:50504]	chr22	41174591	41197456	-1	q13.2	EP300-AS1	46.31	lncRNA	1	3
ENSG00000235257	ITGA9 antisense RNA 1 [Source:HGNC Symbol;Acc:HGNC:49668]	chr3	37693655	37861802	-1	p22.2	ITGA9-AS1	44.51	lncRNA	1	3
ENSG00000214293	Alu-mediated CDKN1A/p21 transcriptional regulator [Source:HGNC Symbol;Acc:HGNC:44173]	chr7	77657659	77696267	-1	q11.23	APTR	43.27	lncRNA	1	3
ENSG00000231690	long intergenic non-protein coding RNA 574 [Source:HGNC Symbol;Acc:HGNC:21598]	chr6	169790057	169802873	1	q27	LINC00574	47.79	lncRNA	1	3
ENSG00000226091	long intergenic non-protein coding RNA 937 [Source:HGNC Symbol;Acc:HGNC:48629]	chr12	8295986	8396803	-1	p13.31	LINC00937	45.31	lncRNA	1	3
ENSG00000167920	transmembrane protein 99 (putative) [Source:HGNC Symbol;Acc:HGNC:28305]	chr17	40819106	40836270	1	q21.2	TMEM99	37.56	lncRNA	1	3
ENSG00000189419	spermatogenesis associated 41 [Source:HGNC Symbol;Acc:HGNC:48613]	chr15	100344047	100350725	-1	q26.3	SPATA41	47.37	lncRNA	1	3
ENSG00000272734	ADIRF antisense RNA 1 [Source:HGNC Symbol;Acc:HGNC:45127]	chr10	86965345	86971311	-1	q23.2	ADIRF-AS1	59.28	lncRNA	1	3
ENSG00000262877	novel transcript	chr17	81388126	81390319	-1	q25.3	ENSG00000262877	61.39	lncRNA	1	3
ENSG00000227036	long intergenic non-protein coding RNA 511 [Source:HGNC Symbol;Acc:HGNC:43564]	chr17	72290091	72640472	-1	q24.3	LINC00511	47.2	lncRNA	13	2
ENSG00000249859	Pvt1 oncogene [Source:HGNC Symbol;Acc:HGNC:9709]	chr8	127794526	128187101	1	q24.21	PVT1	45.87	lncRNA	8	2
ENSG00000250682	long intergenic non-protein coding RNA 491 [Source:HGNC Symbol;Acc:HGNC:43428]	chr5	102604220	102671765	-1	q21.1	LINC00491	37.55	lncRNA	7	2
ENSG00000197989	small nucleolar RNA host gene 12 [Source:HGNC Symbol;Acc:HGNC:30062]	chr1	28578538	28583132	-1	p35.3	SNHG12			5	2
ENSG00000234741	growth arrest specific 5 [Source:HGNC Symbol;Acc:HGNC:16355]	chr1	173858559	173868882	-1	q25.1	GAS5			5	2
ENSG00000267280	TBX2 antisense RNA 1 [Source:HGNC Symbol;Acc:HGNC:50355]	chr17	61393456	61411555	-1	q23.2	TBX2-AS1	62.75	lncRNA	5	2
ENSG00000255794	rhabdomyosarcoma 2 associated transcript [Source:HGNC Symbol;Acc:HGNC:29893]	chr12	97430884	97598415	1	q23.1	RMST	36.66	lncRNA	5	2
ENSG00000245849	RAD51 antisense RNA 1 [Source:HGNC Symbol;Acc:HGNC:48621]	chr15	40686183	40695107	-1	q15.1	RAD51-AS1	45.04	lncRNA	4	2
ENSG00000237928	NFIA antisense RNA 2 [Source:HGNC Symbol;Acc:HGNC:40401]	chr1	60912675	61056885	-1	p31.3	NFIA-AS2	43.01	lncRNA	4	2
ENSG00000226777	family with sequence similarity 30 member A [Source:HGNC Symbol;Acc:HGNC:19955]	chr14	105917979	105932642	1	q32.33	FAM30A	55.93	lncRNA	4	2
ENSG00000269956	MKNK1 antisense RNA 1 [Source:HGNC Symbol;Acc:HGNC:44129]	chr1	46538611	46570255	1	p33	MKNK1-AS1	52.46	lncRNA	3	2
ENSG00000225670	CADM3 antisense RNA 1 [Source:HGNC Symbol;Acc:HGNC:40812]	chr1	159194325	159207973	-1	q23.2	CADM3-AS1	50.67	lncRNA	3	2
ENSG00000274026	family with sequence similarity 27 member E3 [Source:HGNC Symbol;Acc:HGNC:28655]	chr9	67717411	67719178	-1	q21.11	FAM27E3	53.73	lncRNA	3	2
ENSG00000235703	long intergenic non-protein coding RNA 894 [Source:HGNC Symbol;Acc:HGNC:48579]	chrX	149938613	150224580	1	q28	LINC00894	41.92	lncRNA	3	2
ENSG00000196167	colorectal cancer associated 1 [Source:HGNC Symbol;Acc:HGNC:33789]	chr11	111290787	111305498	-1	q23.1	COLCA1	44.76	lncRNA	3	2
ENSG00000226674	testis expressed 41 [Source:HGNC Symbol;Acc:HGNC:48667]	chr2	144666312	145262988	1	q22.3	TEX41	36.41	lncRNA	3	2
ENSG00000218537	MIF antisense RNA 1 [Source:HGNC Symbol;Acc:HGNC:27669]	chr22	23894426	23898930	-1	q11.23	MIF-AS1	59.69	lncRNA	3	2
ENSG00000198590	chromosome 3 open reading frame 35 [Source:HGNC Symbol;Acc:HGNC:24082]	chr3	37381062	37440186	1	p22.2	C3orf35	42.5	lncRNA	3	2
ENSG00000179406	long intergenic non-protein coding RNA 174 [Source:HGNC Symbol;Acc:HGNC:27788]	chr7	66376044	66493566	-1	q11.21	LINC00174	44.08	lncRNA	3	2
ENSG00000255571	MIR9-3 host gene [Source:HGNC Symbol;Acc:HGNC:27388]	chr15	89361579	89398487	1	q26.1	MIR9-3HG	53.82	lncRNA	3	2
ENSG00000274253	novel transcript, sense overlapping NIPA1	chr15	22757841	22778741	1	q11.2		48.93	lncRNA	3	2
ENSG00000223764	long intergenic non-protein coding RNA 2593 [Source:HGNC Symbol;Acc:HGNC:53933]	chr1	916865	921016	-1	p36.33	LINC02593	61.68	lncRNA	3	2
ENSG00000236172	MIR7515 host gene [Source:HGNC Symbol;Acc:HGNC:49838]	chr2	6615389	6651104	-1	p25.2	MIR7515HG	38.53	lncRNA	3	2
ENSG00000152931	prostate androgen-regulated transcript 1 [Source:HGNC Symbol;Acc:HGNC:17263]	chr5	60487713	60548813	1	q12.1	PART1	39.96	lncRNA	13	1
ENSG00000196756	small nucleolar RNA host gene 17 [Source:HGNC Symbol;Acc:HGNC:48600]	chr20	38419638	38435409	-1	q11.23	SNHG17	51.19	lncRNA	10	1
ENSG00000258727	novel transcript, antisense to AP1G2	chr14	23561097	23568073	1	q11.2				8	1
ENSG00000233101	HOXB cluster antisense RNA 3 [Source:HGNC Symbol;Acc:HGNC:40283]	chr17	48549630	48606414	1	q21.32	HOXB-AS3			8	1
ENSG00000267519	miR-23a/27a/24-2 cluster host gene [Source:HGNC Symbol;Acc:HGNC:27620]	chr19	13823880	13842928	-1	p13.12	MIR23AHG			7	1
ENSG00000290733	Novel transcript	chr2	110402914	110435166	-1				lncRNA	7	1
ENSG00000226754	novel transcript, antisense to MAGOH	chr1	53238550	53246482	1	p32.3		42.56	lncRNA	7	1
ENSG00000230002	ALMS1 intronic transcript 1 [Source:HGNC Symbol;Acc:HGNC:41305]	chr2	73456764	73459482	1	p13.1	ALMS1-IT1			6	1
ENSG00000245149	RNF139 antisense RNA 1 (head to head) [Source:HGNC Symbol;Acc:HGNC:48940]	chr8	124462485	124474582	-1	q24.13	RNF139-AS1			6	1
ENSG00000237512	UNC5B antisense RNA 1 [Source:HGNC Symbol;Acc:HGNC:45096]	chr10	71217224	71218228	-1	q22.1	UNC5B-AS1	61.29	lncRNA	6	1
ENSG00000228203	glycosaminoglycan regulatory associated long non-coding RNA [Source:HGNC Symbol;Acc:HGNC:30963]	chr2	6911754	6918734	-1	p25.1	GRASLND	50.55	lncRNA	6	1
ENSG00000233834	novel transcript	chr7	20217577	20221700	1	p21.1		40.74	lncRNA	6	1
ENSG00000182648	long intergenic non-protein coding RNA 1006 [Source:HGNC Symbol;Acc:HGNC:48971]	chr7	156388922	156640654	-1	q36.3	LINC01006	44.18	lncRNA	6	1
ENSG00000224699	LAMTOR5 antisense RNA 1 [Source:HGNC Symbol;Acc:HGNC:40823]	chr1	110347116	110443817	1	p13.3	LAMTOR5-AS1	43.14	lncRNA	5	1
ENSG00000236017	ASMTL antisense RNA 1 [Source:HGNC Symbol;Acc:HGNC:25811]	chrX	1401769	1414028	1	p22.33	ASMTL-AS1			5	1
ENSG00000230148	HOXB cluster antisense RNA 1 [Source:HGNC Symbol;Acc:HGNC:43744]	chr17	48543551	48551250	1	q21.32	HOXB-AS1	50.45	lncRNA	5	1
ENSG00000165511	ZNF22 antisense RNA 1 [Source:HGNC Symbol;Acc:HGNC:23509]	chr10	44997698	45000888	-1	q11.21	ZNF22-AS1	44.41	lncRNA	5	1
ENSG00000205861	Pro-X-Gly collagen triple helix like repeat containing [Source:HGNC Symbol;Acc:HGNC:39839]	chr13	23888842	23897263	1	q12.12	PCOTH	48.34	lncRNA	5	1
ENSG00000222041	cytoskeleton regulator RNA [Source:HGNC Symbol;Acc:HGNC:28717]	chr2	87454781	87636740	1	p11.2	CYTOR	44.71	lncRNA	5	1
ENSG00000215458	apoptosis associated transcript in bladder cancer [Source:HGNC Symbol;Acc:HGNC:51526]	chr21	43805758	43812567	-1	q22.3	AATBC	60.18	lncRNA	5	1
ENSG00000225783	myocardial infarction associated transcript [Source:HGNC Symbol;Acc:HGNC:33425]	chr22	26646411	26676475	1	q12.1	MIAT	50	lncRNA	5	1
ENSG00000291065	Novel transcript	chr10	42254072	42367993	-1				lncRNA	5	1
ENSG00000153363	long intergenic non-protein coding RNA 467 [Source:HGNC Symbol;Acc:HGNC:28227]	chr1	211382736	211435570	1	q32.3	LINC00467	39.05	lncRNA	5	1
ENSG00000276116	FUT8 antisense RNA 1 [Source:HGNC Symbol;Acc:HGNC:44294]	chr14	65411170	65412690	-1	q23.3	FUT8-AS1	56.67	lncRNA	5	1
ENSG00000176753	chromosome 15 putative open reading frame 56 [Source:HGNC Symbol;Acc:HGNC:33868]	chr15	40250664	40252969	-1	q15.1	C15orf56	58.63	lncRNA	5	1
ENSG00000247240	UBL7 antisense RNA 1 (head to head) [Source:HGNC Symbol;Acc:HGNC:48614]	chr15	74461265	74513636	1	q24.1	UBL7-AS1	44.64	lncRNA	5	1
ENSG00000203684	IBA57 divergent transcript [Source:HGNC Symbol;Acc:HGNC:32062]	chr1	228164086	228165512	-1	q42.13	IBA57-DT			4	1
ENSG00000274020	long intergenic non-protein coding RNA 1138 [Source:HGNC Symbol;Acc:HGNC:49454]	chr1	148290889	148519604	-1	q21.2	LINC01138			4	1
ENSG00000226009	KCNIP2 antisense RNA 1 [Source:HGNC Symbol;Acc:HGNC:48680]	chr10	101818800	101828885	1	q24.32	KCNIP2-AS1			4	1
ENSG00000237399	PITRM1 antisense RNA 1 [Source:HGNC Symbol;Acc:HGNC:44675]	chr10	3141632	3167972	1	p15.2	PITRM1-AS1			4	1
ENSG00000246067	RAB30 divergent transcript [Source:HGNC Symbol;Acc:HGNC:48672]	chr11	83072052	83107789	1	q14.1	RAB30-DT			4	1
ENSG00000250988	small nucleolar RNA host gene 21 [Source:HGNC Symbol;Acc:HGNC:50284]	chr15	82750564	82757206	1	q25.2	SNHG21			4	1
ENSG00000184809	B3GALT5 antisense RNA 1 [Source:HGNC Symbol;Acc:HGNC:16424]	chr21	39597147	39612910	-1	q22.2	B3GALT5-AS1			4	1
ENSG00000214870	novel transcript	chr7	26398593	26497595	1	p15.2		42.16	lncRNA	4	1
ENSG00000227165	WDR11 antisense RNA 1 [Source:HGNC Symbol;Acc:HGNC:27437]	chr10	120759898	120851457	-1	q26.12	WDR11-AS1	43.04	lncRNA	4	1
ENSG00000255240	novel transcript	chr11	58933643	59058659	-1	q12.1		39.3	lncRNA	4	1
ENSG00000260852	FBXL19 antisense RNA 1 [Source:HGNC Symbol;Acc:HGNC:27557]	chr16	30919319	30923269	-1	p11.2	FBXL19-AS1	52.62	lncRNA	4	1
ENSG00000234899	SOX9 antisense RNA 1 [Source:HGNC Symbol;Acc:HGNC:49321]	chr17	72067099	72237203	-1	q24.3	SOX9-AS1	44.33	lncRNA	4	1
ENSG00000267260	novel transcript	chr19	36773112	36777078	1	q13.12		45.95	lncRNA	4	1
ENSG00000267575	novel transcript	chr19	27793431	27984984	1	q11		41.93	lncRNA	4	1
ENSG00000174365	small nucleolar RNA host gene 11 [Source:HGNC Symbol;Acc:HGNC:25046]	chr20	38446343	38450940	1	q11.23	SNHG11	52.76	lncRNA	4	1
ENSG00000249673	NOP14 antisense RNA 1 [Source:HGNC Symbol;Acc:HGNC:20205]	chr4	2934882	2961738	1	p16.3	NOP14-AS1	50.56	lncRNA	4	1
ENSG00000177738	novel transcript, sense overlapping to ANXA2R	chr5	43013060	43067452	-1	p12		43.36	lncRNA	4	1
ENSG00000167912	novel transcript	chr8	59119040	59123478	1	q12.1		45.48	lncRNA	4	1
ENSG00000233725	non-coding RNA in the aldehyde dehydrogenase 1A pathway [Source:HGNC Symbol;Acc:HGNC:26981]	chr13	43908669	44030461	1	q14.11	NRAD1	40.39	lncRNA	4	1
ENSG00000245954	long intergenic non-protein coding RNA 2273 [Source:HGNC Symbol;Acc:HGNC:53188]	chr4	152090459	152104720	1	q31.3	LINC02273	46.73	lncRNA	4	1
ENSG00000231651	DLG3 antisense RNA 1 [Source:HGNC Symbol;Acc:HGNC:40182]	chrX	70452958	70455994	-1	q13.1	DLG3-AS1	57.16	lncRNA	4	1
ENSG00000197180	uncharacterized protein BC009467 [Source:NCBI gene (formerly Entrezgene);Acc:158960]	chrX	154424380	154428479	-1	q28	CH17-340M24.3	49.71	lncRNA	4	1
ENSG00000242125	small nucleolar RNA host gene 3 [Source:HGNC Symbol;Acc:HGNC:10118]	chr1	28505980	28510892	1	p35.3	SNHG3			3	1
ENSG00000238164	TNFRSF14 antisense RNA 1 [Source:HGNC Symbol;Acc:HGNC:26966]	chr1	2549920	2557031	-1	p36.32	TNFRSF14-AS1			3	1
ENSG00000237463	LRRC52 antisense RNA 1 [Source:HGNC Symbol;Acc:HGNC:54044]	chr1	165476838	165582155	-1	q24.1	LRRC52-AS1			3	1
ENSG00000225880	long intergenic non-protein coding RNA 115 [Source:HGNC Symbol;Acc:HGNC:26211]	chr1	826206	827522	-1	p36.33	LINC00115			3	1
ENSG00000272589	ZSWIM8 antisense RNA 1 [Source:HGNC Symbol;Acc:HGNC:45103]	chr10	73796514	73801399	-1	q22.2	ZSWIM8-AS1			3	1
ENSG00000269821	KCNQ1 opposite strand/antisense transcript 1 [Source:HGNC Symbol;Acc:HGNC:6295]	chr11	2608328	2699994	-1	p15.5	KCNQ1OT1			3	1
ENSG00000130600	H19 imprinted maternally expressed transcript [Source:HGNC Symbol;Acc:HGNC:4713]	chr11	1995176	2001470	-1	p15.5	H19			3	1
ENSG00000215417	miR-17-92a-1 cluster host gene [Source:HGNC Symbol;Acc:HGNC:23564]	chr13	91347820	91354579	1	q31.3	MIR17HG			3	1
ENSG00000267080	ASB16 antisense RNA 1 [Source:HGNC Symbol;Acc:HGNC:25442]	chr17	44175968	44186723	-1	q21.31	ASB16-AS1			3	1
ENSG00000234912	small nucleolar RNA host gene 20 [Source:HGNC Symbol;Acc:HGNC:33099]	chr17	77086716	77099902	1	q25.2	SNHG20			3	1
ENSG00000261126	RBFA downstream neighbor [Source:HGNC Symbol;Acc:HGNC:48591]	chr18	80046900	80095482	1	q23	RBFADN			3	1
ENSG00000219665	ZNF433 and ZNF878 antisense RNA 1 [Source:HGNC Symbol;Acc:HGNC:53776]	chr19	11987617	12046275	1	p13.2	ZNF433-AS1			3	1
ENSG00000236519	long intergenic non-protein coding RNA 1424 [Source:HGNC Symbol;Acc:HGNC:40558]	chr21	44802577	44804717	1	q22.3	LINC01424			3	1
ENSG00000205559	CHKB divergent transcript [Source:HGNC Symbol;Acc:HGNC:40146]	chr22	50583026	50595634	1	q13.33	CHKB-DT			3	1
ENSG00000228109	MELTF antisense RNA 1 [Source:HGNC Symbol;Acc:HGNC:40373]	chr3	196999460	197004744	1	q29	MELTF-AS1			3	1
ENSG00000226950	differentiation antagonizing non-protein coding RNA [Source:HGNC Symbol;Acc:HGNC:28964]	chr4	52712325	52723623	1	q12	DANCR			3	1
ENSG00000272523	long intergenic non-protein coding RNA 1023 [Source:HGNC Symbol;Acc:HGNC:49004]	chr5	108727825	108728260	-1	q21.3	LINC01023			3	1
ENSG00000249476	novel transcript	chr5	109237120	109326369	-1	q21.3				3	1
ENSG00000226706	novel transcript	chr9	135503273	135506447	-1	q34.3				3	1
ENSG00000234771	SLC25A25 antisense RNA 1 [Source:HGNC Symbol;Acc:HGNC:27844]	chr9	128108581	128118693	-1	q34.11	SLC25A25-AS1			3	1
ENSG00000268895	A1BG antisense RNA 1 [Source:HGNC Symbol;Acc:HGNC:37133]	chr19	58347718	58355455	1	q13.43	A1BG-AS1	55.93	lncRNA	3	1
ENSG00000233527	ZNF529 antisense RNA 1 [Source:HGNC Symbol;Acc:HGNC:51275]	chr19	36573070	36594708	1	q13.12	ZNF529-AS1	42.2	lncRNA	3	1
ENSG00000288569	long intergenic non-protein coding RNA 1949 [Source:HGNC Symbol;Acc:HGNC:25650]	chr5	87205408	87240145	-1	q14.3	LINC01949	37.03	lncRNA	3	1
ENSG00000233237	long intergenic non-protein coding RNA 472 [Source:HGNC Symbol;Acc:HGNC:21380]	chr6	71343427	71420745	-1	q13	LINC00472	37.13	lncRNA	3	1
ENSG00000248801	C8orf34 antisense RNA 1 [Source:HGNC Symbol;Acc:HGNC:27840]	chr8	68302246	68331689	-1	q13.2	C8orf34-AS1	39.76	lncRNA	3	1
ENSG00000125462	MIR9-1 host gene [Source:HGNC Symbol;Acc:HGNC:30780]	chr1	156404250	156456763	-1	q22	MIR9-1HG	49.17	lncRNA	3	1
ENSG00000233930	KRTAP5-1/KRTAP5-2 antisense RNA 1 [Source:HGNC Symbol;Acc:HGNC:27877]	chr11	1571353	1599184	1	p15.5	KRTAP5-AS1	51.87	lncRNA	3	1
ENSG00000233208	long intergenic non-protein coding RNA 642 [Source:HGNC Symbol;Acc:HGNC:44293]	chr14	90453571	90490763	1	q32.11	LINC00642	44.73	lncRNA	3	1
ENSG00000214900	long intergenic non-protein coding RNA 1588 [Source:HGNC Symbol;Acc:HGNC:27503]	chr14	49927571	50105043	-1	q21.3	LINC01588	45.22	lncRNA	3	1
ENSG00000260551	Prader-Willi region non-protein coding RNA 2 [Source:HGNC Symbol;Acc:HGNC:33236]	chr15	24162754	24169948	-1	q11.2	PWRN2	44.18	lncRNA	3	1
ENSG00000245888	NSMCE1 divergent transcript [Source:HGNC Symbol;Acc:HGNC:51368]	chr16	27268205	27290492	1	p12.1	NSMCE1-DT	44.09	lncRNA	3	1
ENSG00000267659	long intergenic non-protein coding RNA 1482 [Source:HGNC Symbol;Acc:HGNC:51128]	chr17	68591796	68763882	1	q24.2	LINC01482	41.29	lncRNA	3	1
ENSG00000251179	TMEM92 antisense RNA 1 [Source:HGNC Symbol;Acc:HGNC:50442]	chr17	50281577	50287855	-1	q21.33	TMEM92-AS1	49.2	lncRNA	3	1
ENSG00000262979	novel transcript	chr17	80315651	80316633	1	q25.3		50.25	lncRNA	3	1
ENSG00000267712	long intergenic non-protein coding RNA 1539 [Source:HGNC Symbol;Acc:HGNC:51307]	chr18	56083356	56137536	-1	q21.2	LINC01539	38.83	lncRNA	3	1
ENSG00000205054	long intergenic non-protein coding RNA 1121 [Source:HGNC Symbol;Acc:HGNC:49266]	chr2	45164816	45323397	-1	p21	LINC01121	44.5	lncRNA	3	1
ENSG00000236682	MAP3K2 divergent transcript [Source:HGNC Symbol;Acc:HGNC:54088]	chr2	127388184	127400580	1	q14.3	MAP3K2-DT	44.7	lncRNA	3	1
ENSG00000233316	Down syndrome critical region 10 [Source:HGNC Symbol;Acc:HGNC:16302]	chr21	38206156	38208644	1	q22.13	DSCR10	53.48	lncRNA	3	1
ENSG00000280109	placenta enriched 4 [Source:HGNC Symbol;Acc:HGNC:14616]	chr21	41175231	41186788	-1	q22.2	PLAC4	46.89	lncRNA	3	1
ENSG00000234492	RPL34 divergent transcript [Source:HGNC Symbol;Acc:HGNC:26749]	chr4	108538190	108620460	-1	q25	RPL34-DT	40.05	lncRNA	3	1
ENSG00000180712	long intergenic non-protein coding RNA 2363 [Source:HGNC Symbol;Acc:HGNC:53286]	chr4	184334292	184353977	-1	q35.1	LINC02363	43.77	lncRNA	3	1
ENSG00000251629	long intergenic non-protein coding RNA 2241 [Source:HGNC Symbol;Acc:HGNC:53126]	chr5	20611806	20937800	1	p14.3	LINC02241	35.5	lncRNA	3	1
ENSG00000228624	HDAC2 and HS3ST5 antisense RNA 2 [Source:HGNC Symbol;Acc:HGNC:43590]	chr6	113969701	114471705	1	q21	HDAC2-AS2	37.94	lncRNA	3	1
ENSG00000228495	long intergenic non-protein coding RNA 1013 [Source:HGNC Symbol;Acc:HGNC:48987]	chr6	132131888	132169374	1	q23.2	LINC01013	36.41	lncRNA	3	1
ENSG00000224116	INHBA antisense RNA 1 [Source:HGNC Symbol;Acc:HGNC:40303]	chr7	41693884	41779388	1	p14.1	INHBA-AS1	40.64	lncRNA	3	1
ENSG00000232093	DCST1 antisense RNA 1 [Source:HGNC Symbol;Acc:HGNC:41147]	chr1	155045191	155046118	-1	q21.3	DCST1-AS1	50.65	lncRNA	3	1
ENSG00000231473	RB1 divergent transcript [Source:HGNC Symbol;Acc:HGNC:42778]	chr13	48296162	48303661	-1	q14.2	RB1-DT	40.25	lncRNA	3	1
ENSG00000269037	long intergenic non-protein coding RNA 1838 [Source:HGNC Symbol;Acc:HGNC:52654]	chr19	34905315	34908188	1	q13.11	LINC01838	50.56	lncRNA	3	1
ENSG00000225062	CATIP antisense RNA 1 [Source:HGNC Symbol;Acc:HGNC:41080]	chr2	218366665	218367835	-1	q35	CATIP-AS1	57.56	lncRNA	3	1
ENSG00000266680	novel transcript, antisense to PTP4A1	chr6	63571005	63572408	-1	q12		45.23	lncRNA	3	1

## Sheet: Survival
Gene_ID	Gene_description	Chromosome_scaffold_name	Gene_start_bp	Gene_end_bp	Strand	Karyotype_band	Gene_name	Gene_GC_content	Gene_type	Curve below	Curve above
ENSG00000269893	small nucleolar RNA host gene 8 [Source:HGNC Symbol;Acc:HGNC:33098]	chr4	118278709	118285316	1	q26	SNHG8	39.12	lncRNA	1	1

## Sheet: Metastasis
											Up			Down
Gene_ID	Gene_description	Chromosome_scaffold_name	Gene_start_bp	Gene_end_bp	Strand	Karyotype_band	Gene_name	Gene_GC_content	Gene_type	Gene_Length	Asc_OV	Met_OV	Met_Asc	Asc_OV	Met_OV	Met_Asc
ENSG00000228315	GUSB pseudogene 11 [Source:HGNC Symbol;Acc:HGNC:42325]	chr22	23638487	23717356	-1	q11.23	GUSBP11	50.35	lncRNA	7764	0	1	1	0	1	1
ENSG00000259134	long intergenic non-protein coding RNA 924 [Source:HGNC Symbol;Acc:HGNC:27081]	chr15	95326528	95507865	1	q26.2	LINC00924	37.41	lncRNA	4113	0	1	0	0	1	0
ENSG00000241158	ADAMTS9 antisense RNA 1 [Source:HGNC Symbol;Acc:HGNC:40625]	chr3	64561322	64592757	1	p14.1	ADAMTS9-AS1	39.06	lncRNA	7003	0	1	0	0	1	0
ENSG00000249669	cardiac mesoderm enhancer-associated non-coding RNA [Source:HGNC Symbol;Acc:HGNC:42872]	chr5	149406689	149432835	1	q32	CARMN	51.97	lncRNA	18004	0	1	0	0	1	0
ENSG00000258498	DIO3 opposite strand upstream RNA [Source:HGNC Symbol;Acc:HGNC:20348]	chr14	101552221	101560431	-1	q32.31	DIO3OS	58.65	lncRNA	5603	0	1	1	0	1	0
ENSG00000267532	mir-497-195 cluster host gene [Source:HGNC Symbol;Acc:HGNC:39523]	chr17	7015818	7019659	-1	p13.1	MIR497HG	55.83	lncRNA	3842	0	1	0	0	1	0
ENSG00000237187	NR2F1 antisense RNA 1 [Source:HGNC Symbol;Acc:HGNC:48622]	chr5	93360779	93585649	-1	q15	NR2F1-AS1	38.28	lncRNA	22725	0	1	0	0	1	0
ENSG00000228613	novel transcript	chr2	1546665	1620113	-1	p25.3	ENSG00000228613	51.3	lncRNA	786	0	1	0	0	1	0
ENSG00000215386	mir-99a-let-7c cluster host gene [Source:HGNC Symbol;Acc:HGNC:1274]	chr21	15928296	16645467	1	q21.1	MIR99AHG	35.52	lncRNA	42926	0	1	0	0	1	0
ENSG00000247271	ZBED5 antisense RNA 1 [Source:HGNC Symbol;Acc:HGNC:48646]	chr11	10858179	10908972	1	p15.4	ZBED5-AS1	40.64	lncRNA	4599	2					1
ENSG00000260517	novel transcript	chr16	29139661	29216706	1	p11.2	ENSG00000260517	51.44	lncRNA	2488	1	1				1
ENSG00000255248	mir-100-let-7a-2-mir-125b-1 cluster host gene [Source:HGNC Symbol;Acc:HGNC:39522]	chr11	122028325	122556721	-1	q24.1	MIR100HG	39.21	lncRNA	28649		1				1
ENSG00000246263	UBR5 antisense RNA 1 [Source:HGNC Symbol;Acc:HGNC:51661]	chr8	102239394	102253750	1	q22.3	UBR5-AS1	39.83	lncRNA	3115		1				1
ENSG00000226194	long intergenic non-protein coding RNA 2519 [Source:HGNC Symbol;Acc:HGNC:53510]	chr6	169369998	169388385	-1	q27	LINC02519	47.66	lncRNA	2685		1				1
ENSG00000227954	TCF21 antisense RNA inducing promoter demethylation [Source:HGNC Symbol;Acc:HGNC:50506]	chr6	133502252	133892802	-1	q23.2	TARID	38.09	lncRNA	8082	1	1		2	2

## Sheet: Subtype
Gene_ID	Gene_description	Chromosome_scaffold_name	Gene_start_bp	Gene_end_bp	Strand	Gene_name	Gene_type	Up	Up	Down	Down
ENSG00000189223	PAX8 antisense RNA 1	chr2	113211421	113276581	1	PAX8-AS1	lncRNA	CCOC	MOC
ENSG00000236532	Long intergenic non-protein coding RNA 1695	chr21	28116094	28228667	-1	LINC01695	lncRNA			CCOC	MOC
ENSG00000233901	Long intergenic non-protein coding RNA 1503	chr9	129332300	129359549	1	LINC01503	lncRNA			ENOC	MOC
ENSG00000197989	Small nucleolar RNA host gene 12	chr1	28578538	28583132	-1	SNHG12	lncRNA			ENOC	HGSOC
