# Supplementary material for: Identification of lncRNAs Deregulated in Epithelial Ovarian Cancer Based on a Gene Expression Profiling Meta-Analysis
Source: Int J Mol Sci. 2023 Jun 28;24(13):10798. doi: 10.3390/ijms241310798 (PMC10341812; doi:10.3390/ijms241310798)
Supplement: Supplementary file 1 [file ijms-24-10798-s001.zip › Supplementary Table S4.xlsx]

## Sheet: STS4 Title
	Supplementary Table S4. Expression levels of lncRNAs in the not cancerous cell line OELE in reference to 57 EOC cell lines.

## Sheet: Upregulated
Gene_ID	Gene_name	Gene_description	Chromosome_scaffold_name	Gene_start_bp	Gene_end_bp	Strand	Karyotype_band	Gene_GC_content	Gene_type	Gene_Length	# studies	Previous references in EOC	OELE position / 58 norm	OELE quartile	NIHOVCAR3.norm	ONCODG1.norm	TOV112D.norm	OV56.norm	CAOV4.norm	OAW28.norm	JHOS2.norm	JHOM1.norm	COV318.norm	COV362.norm	OV90.norm	EFO21.norm	JHOC5.norm	JHOM2B.norm	OVSAHO.norm	TYKNU.norm	OVKATE.norm	SNU8.norm	X59M.norm	KURAMOCHI.norm	OVISE.norm	HEYA8.norm	FUOV1.norm	JHOS4.norm	COV644.norm	OVCAR4.norm	SNU119.norm	OVMANA.norm	OVTOKO.norm	OV7.norm	OVCAR8.norm	RMUGS.norm	OAW42.norm	CAOV3.norm	RMGI.norm
ENSG00000187951	ENSG00000187951	novel transcript	chr15	30658717	30772993	1	q13.2	41.65	lncRNA	5637	10	-	11	1	1034.98	430.854	1382.2	641.469	829.489	349.962	840.247	760.794	1300.89	838.16	1316.18	1486.33	662.415	509.348	864.169	1737.23	1090.81	2083.3	778.29	1587.95	1900.09	1303.04	775.347	1533.48	735.64	691.642	678.396	712.016	1212.82	894.591	556.268	568.019	598.148	2037.1	1314.3
ENSG00000214049	UCA1	urothelial cancer associated 1 [Source:HGNC Symbol;Acc:HGNC:37126]	chr19	15828206	15836328	1	p13.12	48.16	lncRNA	4154	10	[34]	13	1	23.152	14.8205	0	173.988	593.861	3.37584	15.7247	62.5428	6165.81	24.715	15.4558	57056.1	36860.9	37800.6	3.49159	328.032	10.5783	33540.9	17.946	24155.8	87.5427	28.4346	735.819	1260.95	0	11025.8	30600	19.8395	9243.33	0.720863	6.67188	31838.3	4.25945	6294.96	111.393
ENSG00000268658	LINC00664	long intergenic non-protein coding RNA 664 [Source:HGNC Symbol;Acc:HGNC:44319]	chr19	21483374	21503238	1	p12	46.67	lncRNA	5889	9	[12]	11	1	54.0214	3.17583	0	241.649	45.9763	4.50112	1.36737	2.57025	5.06973	0	1.62692	75.0911	0	0	66.3402	20.9204	1.2445	97.4355	1.88905	78.1451	0.83374	2.47257	274.665	4.32574	3.5653	180.579	88.3455	3.30658	2362.63	0	0	17.5275	81.538	585.456	226.181
ENSG00000233901	LINC01503	long intergenic non-protein coding RNA 1503 [Source:HGNC Symbol;Acc:HGNC:51184]	chr9	129332300	129359541	1	q34.11	55.36	lncRNA	4666	9	[37]	6	1	0	53.9891	24.6822	101.053	166.664	851.837	113.491	5.99725	166.287	19.3421	1.62692	119.192	77.7201	75.1748	0	39.3303	0.622253	187.44	209.685	41.0763	62.5305	6.18142	296.963	154.645	22.5802	467.076	118.334	74.9491	22.4437	7.20863	74.2246	34.4057	69.9766	89.7491	71.9976
ENSG00000285756	ENSG00000285756	novel transcript	chrX	3817528	3937855	-1	p22.33	47.21	lncRNA	16206	8	- (en otros cánceres https://www.ncbi.nlm.nih.gov/pmc/articles/PMC8023048/	14	1	2354.65	1031.09	2556.48	4193.28	499.992	1314.33	641.295	1005.83	3976.7	1427.02	1194.98	1797.42	1693.1	371.271	2367.3	3491.19	1942.05	2617.55	1062.59	1175.18	631.975	1942.2	2846.99	3932.1	1159.91	386.046	8695.14	376.95	674.173	1753.86	2829.71	2813.48	309.723	3694.32	1538.44
ENSG00000262772	LINC01977	long intergenic non-protein coding RNA 1977 [Source:HGNC Symbol;Acc:HGNC:52804]	chr17	79819083	79827704	1	q25.3	51.76	lncRNA	3495	8	- (en otros cánceres https://jhoonline.biomedcentral.com/articles/10.1186/s13045-022-01331-2	13	1	25.7245	6.35166	14.9589	1.75745	76.6272	31.5079	60.1641	1.7135	51.7113	12.8948	0.813462	9.53538	2.39139	3.06836	26.1869	2.51045	42.3132	66.058	14.1679	62.1153	61.6968	6.18142	32.4328	90.8406	160.438	35.3056	31.6099	92.5841	25.8965	0.720863	24.1855	10.3866	13.9953	4.17438	65.2054
ENSG00000261183	SPINT1-AS1	SPINT1 antisense RNA 1 [Source:HGNC Symbol;Acc:HGNC:53162]	chr15	40835808	40844387	-1	q15.1	47.75	lncRNA	1239	7	[139]	4	1	1.71497	2.11722	103.965	14.0596	477.004	37.1343	330.219	0.85675	703.679	0	0.813462	871.295	296.532	507.813	0	44.3512	3.73352	379.833	0	97.1804	908.777	1.23629	73.9874	218.45	7.13059	500.645	103.745	27.5548	2.58965	2.88345	19.1816	418.711	26.1652	109.577	39.3949
ENSG00000231764	DLX6-AS1	DLX6 antisense RNA 1 [Source:HGNC Symbol;Acc:HGNC:37151]	chr7	96955141	97014088	-1	q21.3	42.6	lncRNA	16907	6	[140]	7	1	16.2922	78.3372	262.529	330.401	57.4704	774.193	929.809	83.1048	669.205	285.834	0	469.617	358.708	49.0937	206.004	0	1082.1	654.8	14.1679	186.346	0	105.084	177.367	784.041	114.09	513.378	816.183	827.746	184.728	271.045	378.629	601.776	0.608492	0	604.509
ENSG00000188242	PP7080	uncharacterized LOC25845 [Source:NCBI gene (formerly Entrezgene);Acc:25845]	chr5	466124	473098	-1	p15.33	58.18	lncRNA	2766	6	-	14	1	942.374	836.302	394.168	982.415	1475.07	950.862	1100.05	411.24	633.717	900.484	636.941	1045.32	954.164	428.036	698.318	513.805	642.165	460.754	739.564	587.09	1795.04	457.425	1125.01	641.291	659.58	487.912	322.583	883.958	547.28	485.862	919.051	1455.43	982.715	597.979	944.12
ENSG00000162913	OBSCN-AS1	OBSCN antisense RNA 1 [Source:HGNC Symbol;Acc:HGNC:32047]	chr1	228203503	228213664	-1	q42.13	60.11	lncRNA	3862	5	-	4	1	45.4466	25.4066	0	94.0236	36.3979	284.696	518.916	8.56751	170.343	37.6097	0.813463	22.6465	136.309	6.13672	48.8823	41.004	54.7582	54.4978	149.235	156.29	6.66992	0	163.178	243.323	91.5093	54.4053	136.166	250.198	46.6137	14.4173	45.0352	323.933	167.335	112.708	62.4885
ENSG00000248538	PPP1R3B-DT	novel transcript	chr8	9151695	9425524	1	p23.1	43.4	lncRNA	17427	5	-	2	1	0	6.35166	3912.51	2115.97	109.194	136.159	46.4905	2398.05	60.8368	18.2676	150.491	842.689	108.808	2982.45	3.49159	18.4099	13.6896	25.5975	64.2278	2073.85	137.567	8.654	167.232	97.3292	78.4365	23.73	701.901	2.20438	38.8448	1.44173	119.26	436.239	386.393	70.9644	374.931
ENSG00000246582	TNFRSF10A-DT	TNFRSF10A divergent transcript	chr8	23224471	23230926	1	p21.3	44.78	lncRNA	2897	5	-	14	1	178.356	153.499	143.606	152.019	216.472	33.7584	88.8788	929.574	125.729	13.9693	1150.24	513.718	388.601	710.325	319.481	157.321	643.409	229.551	186.072	277.515	325.993	56.8691	23.3111	218.45	250.759	213.57	106.177	48.4965	130.346	0	741.412	264.21	257.392	94.9671	737.636
ENSG00000261189	DSP-AS1	novel transcript, antisense to DSP	chr6	7540451	7541338	-1	p24.3	44.82	lncRNA	888	4	-	8	1	0	3.17583	213.165	19.3319	76.6272	148.537	69.7357	48.8348	31.4323	17.193	0	27.4142	26.3053	29.1494	5.23739	21.7572	0	54.4978	1.88905	31.0577	126.728	0	35.4734	38.9317	78.4365	58.4568	34.8519	51.803	153.653	81.4575	35.0273	22.7208	93.7078	45.9181	51.621
ENSG00000231119	ENSG00000231119	novel transcript, antisense to ZMYND8	chr20	47352561	47354633	1	q13.12		lncRNA		4	-	9	1	39.4442	12.7033	9.7233	36.0277	0	87.7719	35.5515	1.7135	15.2092	15.0439	9.76155	11.9192	4.78278	19.9443	12.2206	50.2089	18.6676	1.65145	17.946	10.0186	30.0146	9.89028	47.6357	8.65148	8.31902	13.3119	10.5366	69.4381	2.58965	9.37122	5.00391	33.7566	48.6794	69.9208	69.96
ENSG00000230337	EXOSC10-AS1	EXOSC10 antisense RNA 1 [Source:HGNC Symbol;Acc:HGNC:40456]	chr1	11099675	11102100	1	p36.22	52.8	lncRNA	536	4	-	9	1	7.71734	12.7033	5.98357	12.3021	0	15.7539	10.2553	10.281	9.12552	1.07456	17.8962	34.5657	7.17417	33.7519	8.72898	0.836815	25.5124	38.8091	7.55621	12.0223	31.6821	22.2531	16.2164	32.4431	21.3918	23.1512	26.7468	3.30658	10.3586	15.1381	42.5332	9.73747	28.5991	28.177	11.5468
ENSG00000251381	LINC00958	long intergenic non-protein coding RNA 958 [Source:HGNC Symbol;Acc:HGNC:48671]	chr11	12961541	12989597	-1	p15.3	43.59	lncRNA	5770	4	[141]	7	1	1.71497	2572.42	3828.74	1419.14	858.224	20.2551	780.083	1764.05	51.7113	7026.57	28.4712	791.436	39.4579	3767.94	1.7458	1153.13	2139.3	107.344	2416.1	1099.04	0	3.70885	1480.76	2500.28	3154.1	1070.16	938.57	1783.35	1.72643	6.48777	0.833985	2171.46	186.199	1254.4	1452.86
ENSG00000229891	LINC01315	long intergenic non-protein coding RNA 1315 [Source:HGNC Symbol;Acc:HGNC:50513]	chr22	42364390	42369284	-1	q13.2	55.83	lncRNA	1325	4	-	2	1	31.7269	2.11722	135.378	86.1151	0	70.8927	108.022	17.135	71.9902	44.0571	8.94809	194.283	211.638	44.4912	41.8991	2.51045	138.762	9.08297	76.5067	115.214	427.709	3.70885	393.248	52.9903	54.6679	49.7751	17.8312	119.037	18.9908	60.5525	34.1934	18.1766	129	10.4359	19.6975
ENSG00000204682	MIR1915HG	MIR1915 host gene [Source:HGNC Symbol;Acc:HGNC:31448]	chr10	21492658	21497260	-1	p12.31	57.38	lncRNA	3799	4	-	9	1	11624.9	809.837	187.734	153.777	233.713	385.971	359.617	412.097	498.862	441.646	593.828	538.749	247.509	26.081	5534.17	66.9452	267.569	352.584	1116.43	297.553	291.809	312.78	563.52	913.813	1997.75	434.664	1489.72	727.447	155.379	1908.85	399.479	39.599	920.04	747.213	281.878
ENSG00000225361	PPP1R26-AS1	PPP1R26 antisense RNA 1 [Source:HGNC Symbol;Acc:HGNC:48717]	chr9	135462727	135480777	-1	q34.3	53.34	lncRNA	4184	4	[142]	5	1	89.1782	77.2786	7.47946	88.7512	61.3017	92.273	538.742	123.372	197.72	398.663	24.4039	54.8284	64.5675	110.461	228.699	153.137	35.4684	170.925	172.848	185.344	142.57	35.8523	344.599	166.541	57.0448	316.014	392.286	317.431	92.3642	100.2	200.99	149.957	67.5426	150.278	215.993
ENSG00000257588	AQP5-AS1	novel transcript, antisense to AQP5	chr12	49951512	49962924	-1	q13.12	56.57	lncRNA	1574	3	-	11	1	0	2.11722	0	282.95	40.2293	69.7674	835.461	0.85675	136.883	1.07456	3.25385	27.4142	141.092	19.9443	0	11.7154	0.622253	132.942	0	1.00186	165.081	0	680.076	120.039	4.75373	291.127	2.43153	93.6863	1.72643	0	0	294.072	206.887	33.395	300.896
ENSG00000282851	BISPR	BST2 interferon stimulated positive regulator [Source:HGNC Symbol;Acc:HGNC:51290]	chr19	17405686	17419324	1	p13.11	47.97	lncRNA	3045	3	-	13	1	6.00238	116.447	23.9343	105.447	360.148	24.7562	564.039	0.85675	1104.19	1.07456	942.803	9.53538	315.663	3.06836	1.7458	128.033	278.769	63.5808	608.275	119.221	33.3496	58.1054	862.51	30.2802	1.18843	1281.42	489.548	500.395	86.3217	124.709	372.791	1082.16	36.5095	226.46	738.315
ENSG00000177335	C8orf31	chromosome 8 open reading frame 31 [Source:HGNC Symbol;Acc:HGNC:26731]	chr8	143039209	143060684	1	q24.3	50.99	lncRNA	4087	3	-	8	1	0	53.9891	0	2216.14	157.086	7.87696	40.3373	5.1405	6.08368	68.7721	0.813463	57.2123	688.72	102.79	0	10.0418	133.784	59.4522	161.514	192.357	29.1809	8.654	214.867	1.08144	257.89	0.57878	5354.22	108.015	81.1424	39.6475	185.145	606.969	0.608492	1.04359	118.185
ENSG00000236529	ENSG00000236529	novel transcript	chr7	65840055	65842396	1	q11.21	57.34	lncRNA	2342	3	-	3	1	12.8622	40.2272	32.9096	12.3021	28.7352	22.5056	6.15315	104.524	51.7113	12.8948	43.927	13.1111	8.36986	85.914	24.4411	23.4308	65.9588	80.0953	38.7256	35.0651	18.3423	50.6877	16.2164	36.7688	26.1455	13.8907	15.3997	19.8395	0.863217	13.6964	111.754	2.59666	15.8208	29.2206	174.56
ENSG00000260912	ENSG00000260912	novel transcript, overlapping ACER2	chr9	19453209	19455173	1	p22.1		lncRNA		3	-	12	1	312.124	6.35166	210.173	61.5108	214.556	459.114	96.3993	110.521	19.265	70.9212	56.9424	23.8384	60.9804	90.5166	375.346	169.037	70.9368	42.9377	20.7796	87.1619	249.288	54.3965	344.599	142.75	178.265	65.4022	376.076	298.694	63.8781	200.4	73.3906	1220.43	338.322	28.177	35.9988
ENSG00000261068	ENSG00000261068	novel transcript	chr6	42092233	42094259	-1	p21.1	50.07	lncRNA	2027	3	-	12	1	0	5.29305	2.24384	0.878725	773.934	39.3848	159.298	0.85675	99.3668	0	0	381.415	100.438	7.6709	0	20.9204	92.0934	156.888	1.88905	6.01116	703.677	4.94514	25.3381	95.1663	7.13059	177.107	94.0191	59.5184	6.04252	0	43.3672	470.644	467.931	25.0463	21.0559
ENSG00000261211	ENSG00000261211	novel transcript	chr6	6680309	6683633	-1	p25.1	43.91	lncRNA	3325	3	-	4	1	3.42993	8.46888	119.671	30.7554	285.436	79.8949	860.074	34.27	110.52	127.873	4.88077	27.4142	43.045	15.3418	1.7458	39.3303	28.0014	28.0746	40.6146	171.318	180.088	22.2531	131.758	216.287	68.9291	87.9746	149.944	416.629	36.2551	129.755	93.4063	128.535	75.4531	121.057	171.843
ENSG00000261924	ENSG00000261924	novel transcript, antisense to RPTOR	chr17	80966239	80971213	-1	q25.3	60.94	lncRNA	4207	3	-	8	1	1.71497	9.52749	16.4548	14.0596	0	5.6264	2.73473	0	17.2371	9.67107	8.94809	3.57577	9.56556	1.53418	5.23739	2.51045	32.3571	6.6058	2.83358	16.0298	5.83618	3.70885	10.1352	25.9545	5.94216	2.8939	4.86306	5.51096	6.90574	5.76691	6.67188	0.649165	14.6038	6.26156	4.07534
ENSG00000268204	ENSG00000268204	novel transcript, antisense to STXBP2	chr19	7633766	7636990	-1	p13.2	54.14	lncRNA	843	3	-	6	1	6.85986	3.17583	0.747946	0.878725	7.66272	24.7562	20.5105	7.71075	39.5439	8.59651	0	1.19192	14.3483	1.53418	0	0.836815	24.2679	93.3069	6.61169	70.1302	0	0	22.2976	5.40718	1.18843	42.8297	1.62102	42.9855	12.085	6.48777	5.00391	16.2291	20.6887	16.6975	21.7351
ENSG00000272275	ENSG00000272275	novel transcript	chr2	10767875	10770058	-1	p25.1	56.41	lncRNA	393	3	-	8	1	2.57245	11.6447	4.48768	4.39363	82.3742	4.50112	13.6737	3.427	12.1674	6.44738	0	21.4546	1.19569	6.13672	0	0	21.7788	1.65145	12.2789	11.0205	18.3423	11.1266	7.09468	5.40718	9.50746	20.8361	55.9252	9.91973	11.2218	7.20863	12.5098	15.58	6.69342	4.17438	2.71689
ENSG00000272763	ENSG00000272763	novel transcript	chr17	48635923	48647023	-1	q21.32	52.06	lncRNA	1596	3	-	12	1	2.57245	497.547	11.2192	0.878725	214.556	121.53	10.2553	723.954	0	0	0	7.15153	399.362	10.7393	0	328.032	305.526	3.3029	518.545	272.506	15.8411	2.47257	0	21.6287	350.587	13.3119	0.810509	1.10219	847.679	0	263.539	4.54415	0	329.776	243.162
ENSG00000247498	GPRC5D-AS1	GPRC5D and HEBP1 antisense RNA 1 [Source:HGNC Symbol;Acc:HGNC:53599]	chr12	12927726	12984645	1	p13.1	42.93	lncRNA	3420	3	-	5	1	111.473	136.561	141.362	58.8746	151.339	4.50112	11.6226	98.5263	47.6555	29.0132	9.76155	230.041	216.421	1.53418	256.632	216.735	120.717	60.2779	161.514	202.376	182.589	114.975	13.1758	176.274	771.293	175.37	17.8312	20.9416	27.6229	3.60432	193.484	248.63	9.12739	158.626	15.6221
ENSG00000286042	LCAL1	lung cancer associated lncRNA 1 [Source:HGNC Symbol;Acc:HGNC:25837]	chr6	79307669	79313384	-1	q14.1	50.52	lncRNA	4498	3	-	14	1	0.857483	1.05861	27.674	7.0298	306.509	38.2595	1847.31	7.71075	18.251	22.5658	0.813462	0	3.58708	3.06836	1.7458	9.20497	1.2445	138.722	67.0614	6.01116	5.00244	1.23629	2.02705	925.709	0	348.426	106.987	9.91973	0.863217	0.720863	0	107.112	32.2501	347.517	3.39611
ENSG00000260034	LCMT1-AS2	LCMT1 antisense RNA 2 [Source:HGNC Symbol;Acc:HGNC:51178]	chr16	25140577	25149032	-1	p12.1	47.84	lncRNA	7990	3	-	10	1	18.0071	25.4066	1.49589	4.39363	42.145	7.87696	26.6637	10.281	42.5858	59.101	2.44039	0	4.78278	4.60254	29.6785	13.389	12.4451	31.3775	26.4468	12.0223	6.66992	3.70885	16.2164	9.73292	8.31902	6.36658	12.1576	15.4307	10.3586	6.48777	2.50195	20.1241	2.43397	18.7847	15.6221
ENSG00000204588	LINC01123	long intergenic non-protein coding RNA 1123 [Source:HGNC Symbol;Acc:HGNC:49269]	chr2	109987063	109996140	1	q13	47.66	lncRNA	3295	3	-	4	1	144.915	417.092	0	272.405	1222.2	10.1275	426.618	1297.98	618.508	0	306.675	624.567	599.043	599.864	171.088	471.127	200.365	155.236	147.346	270.502	822.068	433.936	4.0541	171.948	392.183	1086.37	1505.12	225.949	162.285	0	627.156	417.413	129.609	131.493	312.443
ENSG00000281162	LINC01127	long intergenic non-protein coding RNA 1127 [Source:HGNC Symbol;Acc:HGNC:49292]	chr2	101962056	101987167	1	q11.2	48.1	lncRNA	3841	3	[143]	12	1	0.857483	2.11722	0	7.90853	34.4822	132.783	367.822	161.926	3357.18	1343.2	2.44039	444.587	203.268	26.0811	0	46.0248	0	2184.04	96.3417	567.053	3.33496	0	979.066	1495.63	2.37686	1113.57	17.8312	448.592	0.863217	0	22.5176	7.78998	689.422	398.653	93.0536
ENSG00000259439	LINC01833	long intergenic non-protein coding RNA 1833 [Source:HGNC Symbol;Acc:HGNC:52644]	chr2	44921077	44939199	-1	p21	52.5	lncRNA	3872	3	-	9	1	0	0	2.24384	14.0596	0	194.673	73.8378	38.5538	63.8787	61.2501	182.216	8.34346	129.135	1.53418	0	0.836815	139.385	2.47717	0.944527	186.346	257.626	70.4682	42.5681	176.274	10.6959	24.8876	38.9044	1101.09	47.477	0	58.3789	11.685	121.09	3.13078	664.959
ENSG00000259153	MAP3K9-DT	MAP3K9 divergent transcript	chr14	70808811	70816935	1	q24.2	41.47	lncRNA	1718	3	-	3	1	76.316	15.8792	302.17	151.141	90.0369	433.233	370.556	191.912	245.375	184.825	0.813462	837.921	235.552	168.76	186.8	119.665	84.6264	352.584	340.974	248.461	426.041	147.118	68.9197	142.75	253.136	497.751	445.78	76.0513	198.54	147.777	1407.77	500.506	135.694	133.58	76.073
ENSG00000231920	NEBL-AS1	NEBL antisense RNA 1 [Source:HGNC Symbol;Acc:HGNC:44899]	chr10	21174014	21175048	1	p12.31	66.67	lncRNA	681	3	[144]	13	1	21.4371	5.29305	9.7233	5.27235	38.3136	2.25056	6.83683	0	6.08368	2.14913	0	3.57577	0	7.6709	1.7458	0	0	1.65145	24.5577	8.01488	6.66992	8.654	8.1082	5.40718	0	5.20902	4.86306	0	0	0.720863	0.833985	5.19332	0.608492	7.30516	19.6975
ENSG00000177406	NINJ2-AS1	NINJ2 antisense RNA 1 [Source:HGNC Symbol;Acc:HGNC:40405]	chr12	630858	664196	1	p13.33	46.32	lncRNA	4356	3	-	4	1	2.57245	438.265	623.039	77.3278	235.629	135.034	589.335	0.856751	691.512	339.562	181.402	166.869	483.061	273.084	36.6617	205.02	0.622253	902.517	2.83358	78.1451	686.168	101.375	243.246	167.623	647.696	484.439	268.279	244.687	437.651	167.961	316.914	249.279	178.288	31.3078	122.939
ENSG00000182057	OGFRP1	opioid growth factor receptor pseudogene 1 [Source:HGNC Symbol;Acc:HGNC:50511]	chr22	42269703	42279534	1	q13.2	55.38	lncRNA	5964	3	-	1	1	340.421	101.627	393.42	276.798	137.929	210.427	987.239	702.535	153.106	316.996	186.283	758.063	138.701	388.147	872.898	113.807	431.221	360.842	109.565	245.456	1447.37	182.97	105.407	399.05	802.192	119.229	243.963	128.956	111.355	242.931	761.428	357.041	177.68	255.681	434.023
ENSG00000254389	RHPN1-AS1	RHPN1 antisense RNA 1 (head to head) [Source:HGNC Symbol;Acc:HGNC:28457]	chr8	143366631	143368548	-1	q24.3	56.05	lncRNA	1918	3	[145]	6	1	75.4585	196.901	188.482	137.081	21.0725	127.157	166.819	114.805	465.402	152.588	78.0924	172.829	100.438	32.2178	235.682	34.3094	100.183	272.489	72.7285	264.491	152.575	16.0717	123.65	152.482	230.556	449.712	73.7563	389.074	272.777	108.129	94.2403	52.5823	105.878	15.6539	78.1106
ENSG00000281641	SAMD12-AS1	SAMD12 antisense RNA 1 [Source:HGNC Symbol;Acc:HGNC:30937]	chr8	118620498	118906155	1	q24.12	38.12	lncRNA	3781	3	- (en otros cánceres https://www.hindawi.com/journals/jo/2022/9096365/	6	1	0.857483	25.4066	0	0.878725	82.3742	2.25056	13.6737	5.99725	35.4881	6.44738	0.813462	61.98	33.4794	18.4102	0	0.836815	0.622253	113.95	6.61169	13.0242	30.8484	2.47257	23.3111	30.2802	7.13059	67.1385	26.7468	20.9416	14.6747	0	4.16992	14.2816	4.25945	5.21797	3.39611
ENSG00000254560	BBOX1-AS1	BBOX1 antisense RNA 1 [Source:HGNC Symbol;Acc:HGNC:50700]	chr11	27047186	27220113	-1	p14.1	38.93	lncRNA	1343	12	[35]	29	2	6.00238	138.678	50.8603	0	57.4704	136.159	146.308	0.85675	66.9205	51.5791	0	0	70.546	3.06836	0	0	4.97802	111.473	62.3388	0	145.905	2.47257	92.2308	60.5604	0	0	1.62102	267.833	75.0999	201.842	0	96.0764	117.439	38.613	58.4132
ENSG00000267128	RNF157-AS1	RNF157 antisense RNA 1 [Source:HGNC Symbol;Acc:HGNC:44127]	chr17	76138432	76154650	1	q25.1	54.16	lncRNA	4398	12	[33]	16	2	6.85986	37.0514	201.197	188.926	1.91568	75.3938	171.605	5.99725	217.999	184.825	4.06731	16.6869	70.546	355.93	34.9159	78.6606	42.9354	114.776	18.8905	53.0986	31.6821	3.70885	126.691	100.573	52.291	18.521	389.045	216.03	115.671	85.7827	0	114.253	1.21698	62.6156	191.541
ENSG00000206195	DUXAP8	double homeobox A pseudogene 8	chr22	15784959	15829984	1	q11.1		lncRNA		11	[36]	21	2	1886.46	2521.61	7323.14	2869.04	1183.89	4718.3	1143.8	2388.62	3472.77	2998.03	1323.5	3369.56	903.945	991.08	3610.31	59.4139	2143.66	2661.31	1378.06	912.695	199.264	72.9408	2484.15	2949.07	2307.93	855.437	3160.18	1782.24	4608.72	4143.52	1209.28	4154.01	2861.13	1318.06	6827.55
ENSG00000265992	ESRG	embryonic stem cell related	chr3	54632122	54639857	-1	p14.3		lncRNA		8	[110]	28	2	1.71497	0	0	0	1.91568	0	0	0	0	0	0.813462	3.57577	1.19569	0	3.49159	0	0	0.825725	1.88905	14.026	0	0	2.02705	6.48861	1.18843	0	1.62102	0	6.90574	43.2518	0	22.0716	0	63.6592	0.679223
ENSG00000232677	LINC00665	long intergenic non-protein coding RNA 665 [Source:HGNC Symbol;Acc:HGNC:44323]	chr19	36259540	36331770	-1	q13.12	57.55	lncRNA	12167	8	[39]	23	2	192.934	1019.44	56.8439	2901.55	3645.54	921.605	1032.36	10.281	59.8229	10.7456	6.5077	6643.77	380.231	13.8076	235.682	124.686	256.99	1929.72	136.012	1125.09	3.33496	702.21	5732.5	310.372	6232.14	5258.22	1538.35	1472.53	8044.32	2838.04	1796.4	543.351	5446.61	2284.43	3360.12
ENSG00000225285	LINC01770	long intergenic non-protein coding RNA 1770 [Source:HGNC Symbol;Acc:HGNC:52560]	chr1	1430539	1434573	-1	p36.33	66.84	lncRNA	851	8	- (en otro cánceres https://obgyn.onlinelibrary.wiley.com/doi/full/10.1111/jog.15494?saml_referrer	15	2	6.00238	0	2.24384	3.5149	0	13.5034	76.5725	0	14.1952	1.07456	0	16.6869	1.19569	0	3.49159	6.69452	13.0673	8.25725	0	5.0093	15.0073	0	0	4.32574	0	0	10.5366	40.7811	0	1.44173	0.833985	8.43914	20.6887	0	2.03767
ENSG00000237943	PRKCQ-AS1	PRKCQ antisense RNA 1 [Source:HGNC Symbol;Acc:HGNC:44689]	chr10	6580419	6616921	1	p15.1	40.55	lncRNA	5834	8	[146]	23	2	6.85986	50.8133	390.428	2.63618	1.91568	509.752	135.369	497.772	190.622	269.715	156.998	1570.95	264.248	148.815	401.533	184.099	26.7569	156.888	39.6701	58.1079	15.8411	32.1434	106.42	152.482	1056.52	289.969	202.627	210.519	372.047	186.704	744.748	0.649165	2.43397	1.04359	13.5845
ENSG00000229950	TFAP2A-AS1	TFAP2A antisense RNA 1 [Source:HGNC Symbol;Acc:HGNC:40579]	chr6	10409340	10416446	1	p24.3	56.21	lncRNA	1692	8	- (en otros cánceres https://biologydirect.biomedcentral.com/articles/10.1186/s13062-021-00300-y	19	2	0.857483	45.5202	47.1206	58.8746	107.278	49.5123	36.2352	37.697	48.6694	104.233	3.25385	39.3334	40.6536	26.0811	34.9159	2.51045	137.518	71.0123	109.565	154.286	25.0122	49.4514	316.22	62.7233	112.901	8.6817	39.715	162.022	37.1183	20.905	99.2442	215.523	26.7737	124.188	23.0936
ENSG00000226363	HAGLROS	HAGLR opposite strand lncRNA [Source:HGNC Symbol;Acc:HGNC:50646]	chr2	176177717	176179008	1	q31.1	61.07	lncRNA	1121	7	[40]	17	2	0	277.356	52.3562	111.598	3.83136	390.472	211.942	0.85675	35.4881	1.07456	0	26.2223	151.853	179.499	0	142.259	0	19.8174	12.2789	0	0	24.7257	58.7845	33.5245	19.0149	814.344	22.6943	130.059	31.0758	6.48777	52.541	29.8616	330.411	170.106	232.974
ENSG00000250208	FZD10-AS1	FZD10 antisense divergent transcript [Source:HGNC Symbol;Acc:HGNC:48632]	chr12	130144315	130162256	-1	q24.33	49.43	lncRNA	11498	6	-	27	2	0	0	1370.24	0	1476.99	10.1275	0.683683	3.427	9.12552	10.7456	0.813462	2.38384	32.2837	7.6709	0	7.53134	1.86676	6.6058	3.77811	211.393	38.3521	0	0	0	78.4365	0	0	77.1535	0	0	96.7422	7.14081	0	0	2.03767
ENSG00000272666	KLHDC7B-DT	KLHDC7B divergent transcript	chr22	50542305	50542906	-1	q13.33		lncRNA		6	-	28	2	0	9.52749	0	1.75745	0	0	1.36737	61.686	16.2232	0	0	45.2931	94.4599	69.0381	1.7458	4.18408	0	0	0	2.00372	0	3.70885	0	0	1.18843	4.63024	1.62102	1.10219	0	0	5.00391	20.7733	0	0	40.0742
ENSG00000239213	NCK1-DT	NCK1 divergent transcript [Source:HGNC Symbol;Acc:HGNC:49645]	chr3	136835345	136862618	-1	q22.3	41.82	lncRNA	5815	6	[147]	19	2	324.128	87.8647	248.318	166.079	147.507	250.938	257.749	352.125	378.202	250.373	215.568	147.798	411.319	101.256	176.325	206.693	240.812	516.904	337.196	258.48	240.117	138.464	411.491	519.089	106.959	554.471	191.28	225.949	198.54	198.958	266.041	297.967	600.582	104.359	484.965
ENSG00000176124	DLEU1	deleted in lymphocytic leukemia 1 [Source:HGNC Symbol;Acc:HGNC:13747]	chr13	50082169	50906856	1	q14.2	39.63	lncRNA	24037	5	[148]	27	2	983.533	1067.08	1635.01	596.654	1103.43	282.445	555.835	330.706	1719.65	569.519	875.286	659.133	571.542	721.064	909.56	377.404	1420.6	1213.82	515.712	637.183	540.264	951.94	265.544	256.3	449.227	1435.38	299.888	1254.29	845.953	1262.95	1540.37	655.656	867.102	575.02	518.926
ENSG00000260231	KDM7A-DT	KDM7A divergent transcript [Source:HGNC Symbol;Acc:HGNC:48959]	chr7	140177184	140179640	1	q34	50.47	lncRNA	2457	5	-	27	2	153.489	227.601	3192.23	116.87	32.5665	512.003	879.217	47.978	477.569	148.29	97.6155	63.1719	111.2	65.9697	99.5104	115.481	178.587	137.896	50.0599	270.502	1649.14	39.5611	216.894	82.1891	59.4216	318.908	39.715	1134.16	127.756	271.045	272.713	63.6181	338.322	93.9235	265.576
ENSG00000233058	LINC00884	long intergenic non-protein coding RNA 884 [Source:HGNC Symbol;Acc:HGNC:48570]	chr3	194487140	194521156	1	q29	45.22	lncRNA	9424	5	-	15	2	2.57245	548.36	38.8932	24.6043	293.099	56.264	432.772	23.989	25.3487	45.1317	15.4558	22.6465	270.227	4.60254	1.7458	92.0497	22.4011	59.4522	223.853	45.0837	51.6919	108.793	38.514	22.7101	13.0727	1178.97	17.0207	45.1899	9.49539	5.76691	10.0078	24.6683	102.227	48.0053	260.142
ENSG00000253417	LINC02159	long intergenic non-protein coding RNA 2159 [Source:HGNC Symbol;Acc:HGNC:27749]	chr5	160931778	160938626	-1	q34	50.74	lncRNA	2323	5	-	29	2	0	0	0	0	0	118.154	62.8989	0	24.3347	5.37282	0	10.7273	1.19569	0	0	0.836815	0	6.6058	281.469	0	0	0	31.4193	100.573	0	19.0998	0	1.10219	0	0	0	0	7.9104	60.5285	1.35845
ENSG00000256232	LINC02387	long intergenic non-protein coding RNA 2387 [Source:HGNC Symbol;Acc:HGNC:53313]	chr12	31363481	31369301	-1	p11.21	47.47	lncRNA	868	5	-	16	2	2.57245	0	2.24384	11.4234	0	122.656	30.0821	0	173.385	10.7456	0	10.7273	4.78278	7.6709	392.804	0	23.6456	13.2116	8.50074	0	7.50366	0	12.1623	3.24431	0	23.73	23.5048	28.657	0	47.577	0	2.59666	10.9529	5.21797	6.79223
ENSG00000233718	MYCNOS	MYCN opposite strand [Source:HGNC Symbol;Acc:HGNC:16911]	chr2	15918350	15942249	-1	p24.3	47.76	lncRNA	5100	5	-	28	2	0	0	11.9671	0.878725	17.2411	16.8792	16.4084	0	21.2929	1.07456	0	0	0	0	0	0	0.622253	0.825725	0	0	7.50366	1.23629	1.01353	1.08144	4.75373	3.47268	1.62102	6.61315	0	34.6014	0.833985	19.4749	130.217	0	0
ENSG00000227210	WDR35-DT	novel transcript	chr2	19990209	20004795	1	p24.1	39.65	lncRNA	3852	5	-	18	2	2.57245	17.9964	98.7289	11.4234	55.5547	83.2708	24.6126	17.9918	16.2232	11.8202	13.0154	26.2223	40.6536	30.6836	10.4748	51.0457	13.0673	73.4895	26.4468	22.0409	44.1882	29.6708	26.3517	74.6191	54.6679	52.0902	64.8407	41.8833	3.45287	47.577	60.8809	17.5275	112.571	13.5667	7.47145
ENSG00000215022	ENSG00000215022	novel transcript, antisense to PHACTR1	chr6	13264861	13295586	-1	p24.1	46.94	lncRNA	3115	4	-	21	2	17.1497	33.8755	12.7151	10.5447	101.531	32.6331	33.5005	11.1378	17.2371	22.5658	18.7096	22.6465	23.9139	33.7519	15.7122	21.7572	36.7129	10.7344	86.8965	73.1358	26.6797	7.41771	39.5275	67.049	93.8861	30.6754	47.0095	80.46	36.2551	14.4173	15.0117	8.43914	36.5095	31.3078	116.826
ENSG00000260418	ENSG00000260418	novel transcript	chr6	136335714	136336087	-1	q23.3	52.67	lncRNA	374	4	-	20	2	0	1.05861	5.98357	0	208.809	3.37584	15.7247	5.99725	8.11157	2.14913	0	44.1011	13.1526	10.7393	0	0	0	3.3029	0	1.00186	22.511	0	4.0541	2.16287	9.50746	21.9936	9.72611	3.30658	0	0	1.66797	24.0191	0	0	1.35845
ENSG00000229153	EPHA1-AS1	EPHA1 antisense RNA 1 [Source:HGNC Symbol;Acc:HGNC:27799]	chr7	143407813	143523449	1	q35	41.97	lncRNA	5316	4	-	21	2	3.42993	69.8683	2.24384	0	113.025	16.8792	20.5105	0	13.1813	0	30.9116	28.6061	47.8278	1.53418	1.7458	9.20497	1.86676	25.5975	5.66716	12.0223	8.3374	3.70885	12.1623	229.264	0	65.981	7.29458	27.5548	51.793	172.286	50.0391	12.9833	18.8633	18.7847	8.8299
ENSG00000228812	LAMA5-AS1	LAMA5 antisense RNA 1 [Source:HGNC Symbol;Acc:HGNC:40334]	chr20	62352995	62356480	1	q13.33	65.92	lncRNA	843	4	-	18	2	0	1.05861	0	1.75745	28.7352	0	3.41842	0	5.06973	4.29825	0	1.19192	26.3053	0	0	0.836815	0	12.3859	10.3898	2.00372	0	3.70885	34.4599	2.16287	0	6.94536	1.62102	2.20438	3.45287	0	10.8418	0	13.3868	2.08719	4.07534
ENSG00000269416	LINC01224	long intergenic non-protein coding RNA 1224 [Source:HGNC Symbol;Acc:HGNC:49676]	chr19	23399233	23416075	-1	p12	45.01	lncRNA	3989	4	-	17	2	1.71497	87.8647	1578.91	206.5	40.2293	307.202	1099.36	6.854	42.5858	1.07456	224.516	818.851	28.6967	1.53418	302.023	17.5731	400.108	3980.82	1.88905	733.362	23.3447	76.6497	982.106	29.1988	230.556	1980.59	67.2723	4.40877	1449.34	852.06	180.975	8.43914	156.382	1434.94	76.7522
ENSG00000233077	LINC01271	long intergenic non-protein coding RNA 1271 [Source:HGNC Symbol;Acc:HGNC:50327]	chr20	50310711	50321342	-1	q13.13	49.45	lncRNA	2250	4	-	23	2	0	30.6997	4.48768	3.5149	1.91568	10.1275	0	52.2618	2.02789	18.2676	14.6423	0	17.9354	0	0	15.8995	0	0.825725	46.2818	23.0428	0	32.1434	61.825	12.9772	21.3918	12.7332	0	8.81754	10.3586	6.48777	73.3906	3.89499	59.6322	11.4795	16.3013
ENSG00000215866	LINC01356	long intergenic non-protein coding RNA 1356 [Source:HGNC Symbol;Acc:HGNC:50587]	chr1	112820170	112850643	-1	p13.2	46.13	lncRNA	3183	4	-	22	2	0	99.5094	0	3.5149	0	3.37584	29.3984	142.221	19.265	4.29825	190.35	63.1719	75.3287	33.7519	5.23739	21.7572	0.622253	30.5518	4.72263	0	0	1.23629	0	7.57005	43.972	459.551	31.6099	48.4965	107.902	2.88345	24.1855	157.098	34.0756	2.08719	10.8676
ENSG00000257084	MIR200CHG	MIR200C and MIR141 host gene [Source:HGNC Symbol;Acc:HGNC:53161]	chr12	6963246	6964447	1	p13.31	61.81	lncRNA	350	4	-	26	2	0.857483	0	30.6658	0	55.5547	0	28.031	0.85675	21.2929	0	0	96.5457	23.9139	53.6963	0	1.67363	0	189.091	0	0	19.176	0	0	11.8958	0	55.5629	40.5255	0	0	0	20.0156	88.9356	0	0	0
ENSG00000204528	PSORS1C3	psoriasis susceptibility 1 candidate 3 [Source:HGNC Symbol;Acc:HGNC:17203]	chr6	31173735	31177899	-1	p21.33	52.15	lncRNA	593	4	-	23	2	0	0	0	4.39363	9.5784	0	0	167.923	10.1395	4.29825	0	0	0	95.1191	0	25.9413	0.622253	18.9917	0.944527	87.1618	1.66748	0	50.6763	1.08144	1.18843	13.3119	57.5462	7.71535	0	0	107.584	25.9666	0	6.26156	18.339
ENSG00000285230	RALY-AS1	RALY antisense RNA 1 [Source:HGNC Symbol;Acc:HGNC:50743]	chr20	33980679	33994357	-1	q11.22	48.64	lncRNA	10152	4	-	18	2	140.627	135.502	130.891	139.717	174.327	1116.28	456.017	275.874	213.943	604.979	200.112	238.384	75.3287	245.469	226.953	58.5771	174.853	142.85	200.24	621.153	613.633	124.865	510.817	498.542	211.541	80.4505	299.078	299.796	64.7413	212.655	447.016	259.666	306.68	156.539	127.694
ENSG00000226051	ZNF503-AS1	ZNF503 antisense RNA 1 [Source:HGNC Symbol;Acc:HGNC:27370]	chr10	75243568	75373500	1	q22.2	45.28	lncRNA	5276	4	-	26	2	0	1.05861	0	0	1.91568	23.6309	0.683683	0	0	1.07456	0	19.0708	3.58708	7.6709	1.7458	0	0	20.6431	0.944527	0	20.0098	1.23629	4.0541	6.48861	4.75373	7.52414	1.62102	8.81754	0	0	0	3.24582	0	0	14.9429
ENSG00000232671	ZNF687-AS1	ZNF687 antisense RNA 1 [Source:HGNC Symbol;Acc:HGNC:54048]	chr1	151279678	151281950	-1	q21.3	53.94	lncRNA	989	4	-	29	2	66.0262	13.7619	71.0549	43.0575	22.9882	103.526	58.7968	59.1158	43.5997	34.386	71.5847	85.8184	21.5225	59.833	55.8655	21.7572	32.9794	133.767	57.6161	21.0391	102.55	46.9788	75.0009	61.6418	33.2761	112.862	34.0414	38.5767	19.854	102.363	30.8574	42.1957	111.354	43.831	77.4314
ENSG00000203711	C6orf99	chromosome 6 putative open reading frame 99 [Source:HGNC Symbol;Acc:HGNC:21179]	chr6	158869848	158919105	1	q25.3	45.18	lncRNA	1829	3	-	16	2	13.7197	34.9341	68.0631	24.6043	264.364	0	150.41	116.518	27.3766	13.9693	0	11.9192	88.4814	196.375	0	5.85771	21.1566	60.2779	10.3898	77.1432	26.6797	32.1434	15.2029	78.9448	13.0728	49.1963	23.5048	15.4307	75.0999	0	89.2363	56.4773	40.769	100.185	16.3014
ENSG00000253549	CA3-AS1	CA3 antisense RNA 1 [Source:HGNC Symbol;Acc:HGNC:51657]	chr8	85440596	85464915	-1	q21.2	39.95	lncRNA	3728	3	-	19	2	36.8718	3.17583	0	93.1449	7.66272	3.37584	2.73473	22.2755	15.2092	6.44738	0	60.788	7.17417	35.2861	47.1365	40.1671	0	165.971	0.944527	15.0279	0	0	30.4058	652.106	85.5671	186.946	96.4506	47.3943	1.72643	0	70.0547	1.29833	12.7783	34.4386	33.9612
ENSG00000249395	CASC9	cancer susceptibility 9 [Source:HGNC Symbol;Acc:HGNC:48906]	chr8	75120409	75352327	-1	q21.13	35.85	lncRNA	3453	3	[149]	27	2	5.1449	261.477	375.469	76.4491	180.074	108.027	118.961	11.9945	197.72	24.715	212.314	0	135.113	87.4482	123.951	0.836815	3.11126	1059.4	43.4482	1.00186	387.689	0	5.06763	244.405	86.7555	0.57878	730.269	393.483	0	498.837	0	402.482	0.608492	350.648	250.633
ENSG00000253978	CTB-178M22.2	uncharacterized LOC101927862 [Source:NCBI gene (formerly Entrezgene);Acc:101927862]	chr5	168229583	168269415	-1	q34	46.97	lncRNA	645	3	[150]	25	2	0.857483	0	0	14.9383	1.91568	19.1298	11.6226	8.56751	21.2929	7.52194	0	13.1111	8.36986	3.06836	6.98318	3.34726	0	27.2489	15.1124	19.0354	14.1736	0	15.2029	16.2215	55.8563	10.418	25.1258	2.20438	3.45287	20.1842	11.6758	24.6683	36.5095	4.17438	4.75456
ENSG00000224272	ENSG00000224272	novel transcript	chr2	241808312	241812016	-1	q37.3	61.65	lncRNA	2250	3	-	17	2	3.42993	3.17583	0	32.5128	0	28.132	1.36737	0	1.01395	4.29825	0	650.789	0	0	0	0	3.11126	0.825725	15.1124	14.026	27.5134	0	36.4869	42.176	11.8843	8.6817	4.86306	56.2118	1.72643	1.44173	0.833985	2.59666	330.411	2.08719	2.71689
ENSG00000225335	ENSG00000225335	novel transcript	chr22	18076527	18078884	-1	q11.21	51.74	lncRNA	2235	3	-	22	2	36.8718	41.2858	35.1535	72.9342	40.2293	23.6309	93.6646	108.807	219.012	34.386	42.3	151.374	248.704	67.5039	31.4243	35.1463	67.2033	218.817	65.1723	82.1526	172.584	45.7426	98.312	196.821	10.6959	192.155	38.0939	60.6206	63.8781	28.8345	140.943	58.4248	50.5049	57.3977	78.7899
ENSG00000236924	ENSG00000236924	novel transcript	chr9	6645956	6670635	1	p24.1	46.04	lncRNA	526	3	-	24	2	23.152	2.11722	2.99178	15.8171	21.0725	12.3781	315.862	12.8513	4.05579	4.29825	0	3.57577	20.3268	62.9014	22.6954	3.34726	42.9354	18.9917	12.2789	4.00744	0	1.23629	154.056	48.6646	5.94216	13.8907	38.0939	36.3723	4.31609	38.2058	70.8887	49.3365	18.2548	9.39235	16.9806
ENSG00000245719	ENSG00000245719	novel transcript	chr15	67834310	67838879	-1	q23	53.41	lncRNA	1986	3	-	29	2	0	1.05861	0	0	0	3.37584	5.46947	0	2.02789	0	0	1.19192	1.19569	0	5.23739	0	4.35577	1.65145	0	2.00372	0.83374	0	0	1.08144	0	0	0.810509	1.10219	0.863217	6.48777	3.33594	0	6.69342	0	0
ENSG00000250899	ENSG00000250899	novel transcript	chr12	3041437	3044950	1	p13.33	54.7	lncRNA	3514	3	-	27	2	1230.49	759.024	4.48768	508.782	1191.55	234.058	1365.32	968.985	558.685	1396.93	678.428	463.658	706.655	164.157	1120.8	385.772	1098.28	905.82	326.806	577.072	855.418	574.873	259.462	754.842	921.035	203.152	762.689	354.906	1972.45	1416.5	626.322	618.654	878.054	434.135	407.534
ENSG00000256234	ENSG00000256234	novel transcript, antisense to SSPN and ITPR2	chr12	26211164	26335856	-1	p11.23	41.03	lncRNA	699	3	-	29	2	0	1.05861	0	0	0	104.651	0	0.85675	1.01395	2.14913	0	13.1111	0	0	0	0.836815	0	9.08297	5.66716	2.00372	0	0	54.7304	57.3161	5.94216	10.418	0.810509	604.001	0	0	0	0	60.8492	0	2.71689
ENSG00000259540	ENSG00000259540	novel transcript, antisense to LINS1	chr15	100558677	100559798	1	q26.3	59.18	lncRNA	632	3	-	20	2	0	9.52749	0	3.5149	3.83136	0	2.05105	2.57025	2.02789	5.37282	0	5.95961	1.19569	0	8.72898	0.836815	3.73352	2.47717	9.44527	2.00372	6.66992	0	0	0	0	0.57878	0	1.10219	5.1793	0.720863	2.50195	1.29833	0	2.08719	1.35845
ENSG00000261061	ENSG00000261061	novel transcript	chr16	81030770	81031485	1	q23.2	43.44	lncRNA	716	3	-	15	2	88.3207	53.9891	89.0056	74.6916	160.917	42.7607	79.9909	50.5483	138.911	35.4606	143.169	666.284	113.591	84.3799	52.3739	118.828	107.028	52.8464	20.7796	87.1619	240.117	76.6497	51.6898	63.8047	186.584	152.219	37.2834	48.4965	66.4677	39.6475	208.496	35.0549	74.2361	116.882	57.0547
ENSG00000261135	ENSG00000261135	novel transcript	chr1	16514645	16515754	1	p36.13	41.26	lncRNA	1110	3	-	15	2	49.734	20.1136	121.915	11.4234	9.5784	218.304	41.021	47.978	21.2929	22.5658	26.0308	34.5657	22.7182	16.876	71.5776	10.0418	28.6236	52.0207	36.8365	195.363	65.0318	16.0717	37.5004	47.5832	112.901	92.6048	38.0939	84.8688	18.1276	69.9237	171.801	47.389	198.369	32.3514	24.452
ENSG00000269155	ENSG00000269155	novel transcript	chr6	167795530	167798248	1	q27	58.15	lncRNA	2719	3	-	29	2	0	4.23444	0	0.878725	38.3136	4.50112	0	0	2.02789	0	0	22.6465	10.7613	0	0	0	0	0	0	0	6.66992	0	1.01353	0	0	6.94536	0.810509	1.10219	0	2.88345	0	0	94.3163	2.08719	2.71689
ENSG00000272872	ENSG00000272872	novel transcript, sense intronic to novel transcript	chr22	15823197	15823890	1	q11.1	48.56	lncRNA	694	3	-	15	2	211.798	302.763	90.5015	131.809	45.9763	254.313	196.217	197.053	147.022	217.062	95.1751	166.869	92.0685	125.803	288.056	12.5522	235.212	163.494	379.7	96.1786	11.6724	1.23629	248.314	307.128	212.729	26.6239	129.681	292.081	277.093	132.639	73.3906	352.496	334.062	105.403	353.875
ENSG00000273523	ENSG00000273523	novel transcript, antisense to NEK3 & NEK5	chr13	52128891	52132723	1	q14.3	42.6	lncRNA	3433	3	-	26	2	13.7197	5.29305	0	3.5149	0	5.6264	77.9399	1.7135	8.11157	2.14913	7.32116	0	2.39139	1.53418	20.9495	8.36815	4.97802	4.95435	0	3.00558	7.50366	1.23629	6.08115	16.2215	3.5653	5.20902	4.05255	18.7373	1.72643	3.60432	10.8418	7.14081	8.51889	2.08719	10.8676
ENSG00000275216	ENSG00000275216	novel transcript	chr13	109269634	109278512	1	q33.3	42.81	lncRNA	5087	3	-	19	2	840.333	138.678	0	1905.95	2680.03	153.038	6152.47	10950.1	8018.29	265.417	52.0616	2789.1	1705.06	1750.5	700.064	1389.95	103.294	6382.85	6850.65	7819.52	184.257	322.67	61.825	42.176	4.75373	9369.3	4670.15	936.863	13701.9	368.361	5.83789	7136.27	1840.69	10708.3	21708.7
ENSG00000246523	FZD4-DT	FZD4 divergent transcript [Source:HGNC Symbol;Acc:HGNC:54219]	chr11	86955616	87021909	1	q14.2	41.87	lncRNA	1988	3	-	24	2	12.0048	5.29305	7.47946	1.75745	70.8801	16.8792	172.972	37.697	75.0321	26.8641	26.0308	35.7577	5.97847	3.06836	27.9327	4.18408	18.0453	58.6264	16.057	20.0372	41.687	4.94514	34.4599	10.8144	120.032	53.8266	8.9156	42.9855	12.085	34.6014	37.5293	24.0191	34.6841	7.30516	12.226
ENSG00000251191	LINC00589	long intergenic non-protein coding RNA 589	chr8	29673922	29748109	-1	p12		lncRNA		3	-	24	2	0.857483	0	2.99178	0.878725	0	3.37584	0	0	1.01395	0	0	0	2.39139	1.53418	0	0.836815	0.622253	0	0.944527	3.00558	12.5061	4.94514	0	0	1.18843	0	0.810509	4.40877	0	0	0	23.3699	3.04246	0	3.39611
ENSG00000229404	LINC00858	long intergenic non-protein coding RNA 858 [Source:HGNC Symbol;Acc:HGNC:27276]	chr10	84267747	84294659	1	q23.1	40.69	lncRNA	4726	3	[151]	20	2	38.5867	20.1136	26.1781	59.7533	137.929	258.815	106.655	17.9918	172.371	70.9212	204.993	0	139.896	50.6279	281.073	1.67363	47.2912	227.074	0	105.195	86.709	0	10.1352	158.971	146.177	23.73	164.533	49.5986	0	65.5986	0	170.73	37.118	1.04359	120.222
ENSG00000267586	LINC00907	long intergenic non-protein coding RNA 907 [Source:HGNC Symbol;Acc:HGNC:44327]	chr18	42159283	42691422	1	q12.3	37.87	lncRNA	10962	3	-	16	2	1.71497	3.17583	1.49589	4.39363	0	2.25056	0	2.57025	13.1813	3.22369	2.44039	5.95961	0	0	0	1.67363	0.622253	0	3.77811	1.00186	4.1687	1.23629	7.09468	2.16287	4.75373	0	0.810509	6.61315	0	2.16259	0.833985	11.685	0	2.08719	5.43378
ENSG00000230587	LINC02580	long intergenic non-protein coding RNA 2580 [Source:HGNC Symbol;Acc:HGNC:53751]	chr2	43092530	43132482	-1	p21	49.86	lncRNA	3092	3	-	18	2	0	2.11722	1.49589	0.878725	0	7.87696	2.05105	1.7135	0	1.07456	0	3.57577	0	3.06836	3.49159	2.51045	1.2445	0	0	2.00372	2.50122	0	3.04058	3.24431	3.5653	3.47268	3.24204	3.30658	0	22.3468	0.833985	3.89499	4.86794	3.13078	1.35845
ENSG00000226328	NUP50-DT	NUP50 divergent transcript	chr22	45133020	45163781	-1	q13.31		lncRNA		3	-	28	2	248.67	55.0477	355.274	886.634	427.197	228.432	192.115	297.292	312.296	77.3686	423.814	256.263	401.753	1107.68	143.155	247.697	143.118	358.365	147.346	288.536	774.545	692.32	88.1767	137.342	102.205	321.223	757.826	290.979	215.804	142.01	164.295	850.406	244.614	262.986	348.441
ENSG00000231789	PIK3CD-AS2	PIK3CD antisense RNA 2 [Source:HGNC Symbol;Acc:HGNC:51334]	chr1	9672426	9687555	-1	p36.22	49.65	lncRNA	939	3	-	22	2	232.378	78.3372	4.48768	28.9979	0	133.908	54.011	97.6696	70.9763	81.6668	303.421	9.53538	203.268	3.06836	176.325	58.5771	239.567	229.551	37.7811	16.0298	35.8508	38.3248	27.3652	235.753	103.394	65.4022	4.05255	190.679	35.3919	235.001	65.0508	88.2864	151.515	21.9155	22.4144
ENSG00000237686	SCIRT	stem cell inhibitory RNA transcript [Source:HGNC Symbol;Acc:HGNC:55341]	chr6	43995723	44074652	-1	p21.1	51.47	lncRNA	2893	3	-	26	2	0	34.9341	529.546	60.632	17.2411	45.0112	134.686	107.094	34.4742	34.386	9.76155	10.7273	37.0665	113.529	1.7458	33.4726	1.2445	24.7717	174.737	70.1302	43.3545	35.8523	85.1361	55.1532	134.293	83.3444	68.8933	47.3943	48.3402	25.9511	354.443	114.902	81.538	83.4875	173.202
ENSG00000253302	STAU2-AS1	STAU2 antisense RNA 1 [Source:HGNC Symbol;Acc:HGNC:44101]	chr8	73420004	73441526	1	q21.11	44.46	lncRNA	2279	3	-	15	2	17.1497	2.11722	0	29.8767	0	5.6264	9.57157	5.1405	9.12552	1.07456	1.62692	2.38384	0	70.5722	10.4748	1.67363	1.2445	0.825725	459.04	0	0	0	2.02705	1.08144	1.18843	1.15756	9.72611	1.10219	3.45287	1.44173	4.16992	2.59666	0	9.39235	5.43378
ENSG00000230061	TRPM2-AS	TRPM2 antisense RNA [Source:HGNC Symbol;Acc:HGNC:50758]	chr21	44414588	44425272	-1	q22.3	57.84	lncRNA	2292	3	[152]	22	2	0.857483	0	0	33.3916	264.364	0	18.4595	2.57025	70.9763	1.07456	0	81.0507	37.0665	0	0	0	0	161.016	0.944527	43.08	31.6821	46.9788	0	197.903	128.351	49.7751	64.8407	1.10219	2.58965	30.2763	72.5567	137.623	34.0756	90.7927	73.3561
ENSG00000230937	MIR205HG	MIR205 host gene [Source:HGNC Symbol;Acc:HGNC:43562]	chr1	209428817	209432838	1	q32.2	47.91	lncRNA	3523	10	-	38	3	1.71497	6.35166	136.874	2.63618	32.5665	6.75168	168.186	5.99725	129.785	2.14913	4.88077	2905.91	1149.06	19.9443	3.49159	5.85771	16.8008	1165.92	4.72263	103.192	0	8.654	5.06763	44.3389	0	2.31512	254.5	2.20438	3.45287	40.3683	0	45.4415	1.21698	6.26156	4.07534
ENSG00000224189	HAGLR	HOXD antisense growth-associated long non-coding RNA [Source:HGNC Symbol;Acc:HGNC:43755]	chr2	176164051	176188958	-1	q31.1	48.23	lncRNA	5120	8	[130]	34	3	94.3231	305.938	2041.89	197.713	3.83136	1924.23	975.616	492.632	107.478	369.65	9.76155	56.0204	945.794	915.905	171.088	1169.87	84.6264	768.75	943.582	345.642	315.154	49.4514	94.2579	218.45	963.818	3150.3	667.86	2251.78	618.927	7.9295	217.67	1125	1373.98	696.077	1833.9
ENSG00000274827	LINC01297	long intergenic non-protein coding RNA 1297 [Source:HGNC Symbol;Acc:HGNC:50443]	chr14	19344578	19384587	-1	q11.2	42.96	lncRNA	4414	8	- (en otros cánceres https://www.ncbi.nlm.nih.gov/pmc/articles/PMC5467540/	30	3	0	2.11722	0	0	0	3.37584	2.73473	0	0	0	0.813462	0	0	1.53418	0	0	1.86676	1.65145	102.953	11.0205	0	1.23629	249.327	18.3844	1.18843	0	0.810509	17.6351	0	0	0	0	35.901	0	0.679223
ENSG00000237594	TIAM1-AS1	novel transcript, antisense to TIAM1	chr21	31559245	31560487	1	q22.11	58.57	lncRNA	822	8	-	38	3	48.8765	6.35166	14.9589	4.39363	1.91568	6.75168	129.9	5.99725	48.6694	25.7895	0	7.15153	31.0881	0	36.6617	10.8786	0.622253	11.5601	3.77811	20.0372	3.33496	0	50.6763	47.5832	5.94216	29.5178	10.5366	50.7008	39.708	27.3928	66.7188	3.89499	11.5613	3.13078	2.71689
ENSG00000146521	LINC01558	long intergenic non-protein coding RNA 1558 [Source:HGNC Symbol;Acc:HGNC:21235]	chr6	167784537	167796872	-1	q27	47.35	lncRNA	2780	7	[153]	31	3	0	1.05861	0	0	137.929	1.12528	0	0	0	0	0	60.788	34.6751	0	0	0	0	0.825725	0	0	42.5208	0	6.08115	0	0	14.4695	0.810509	0	1.72643	0.720863	0	0	85.7974	2.08719	8.15068
ENSG00000224870	MRPL20-AS1	MRPL20 antisense RNA 1 [Source:HGNC Symbol;Acc:HGNC:27125]	chr1	1399520	1402046	1	p36.33	59.4	lncRNA	2527	7	- (en otros cánceres https://www.ncbi.nlm.nih.gov/pmc/articles/PMC7887822/	36	3	1352.25	1597.44	1737.48	1004.38	1360.13	1668.79	1608.71	532.899	1804.83	1582.83	1626.11	1017.9	646.871	1672.26	1435.04	1138.07	1686.93	1007.38	1211.83	919.708	2634.62	1267.19	2015.9	2594.36	1358.38	1606.12	1337.34	2401.68	1145.49	1347.29	1215.95	1152.27	2140.68	972.63	1021.55
ENSG00000269609	C10orf95-AS1	C10orf95 antisense RNA 1 [Source:HGNC Symbol;Acc:HGNC:45238]	chr10	102449816	102461106	1	q24.32	51.6	lncRNA	6160	6	-	30	3	733.148	373.69	1208.68	234.62	816.079	470.367	1018	322.995	1120.41	865.024	445.777	913.012	509.366	567.646	483.586	773.217	553.183	1440.89	391.034	779.447	219.274	75.4134	2443.61	1725.97	759.408	689.906	1167.94	1054.8	226.163	291.95	1366.9	1014.64	2447.97	361.084	906.083
ENSG00000286546	ENSG00000286546	novel transcript, antisense to MACROD2	chr20	15892355	15985876	-1	p12.1	38.94	lncRNA	2297	6	-	38	3	0	6.35166	0	5893.61	5.74704	385.971	73.8378	77.9643	14.1952	843.532	0	0	1.19569	4068.64	3.49159	0	1.86676	0	636.611	0	0	0	1010.49	11.8958	246.006	0	6772.62	1646.67	0	0	0	3298.41	336.496	2512.97	140.599
ENSG00000240859	LINC03014	novel transcript	chr7	149549	155465	1	p22.3	51.41	lncRNA	5197	6	-	33	3	22.2946	192.667	0	27.2405	70.8801	10.1275	21.1942	0	9.12552	2.14913	1.62692	383.799	198.485	0	6.98318	175.731	4.97802	134.593	5.66716	85.1581	106.719	129.81	196.624	10.8144	7.13059	21.4149	581.135	39.6789	101.86	10.0921	137.607	5.84248	97.3588	8.34875	67.9223
ENSG00000228288	PCAT6	prostate cancer associated transcript 6 [Source:HGNC Symbol;Acc:HGNC:43714]	chr1	202810954	202812156	1	q32.1	60.6	lncRNA	890	6	[154]	32	3	46.3041	58.2236	20.1945	28.1192	1.91568	145.161	141.522	139.65	137.897	52.6536	17.8962	91.778	19.1311	101.256	50.6281	31.799	69.6923	26.4232	331.529	123.229	19.176	55.6328	161.15	50.8275	36.8414	86.817	108.608	106.913	18.1276	56.9482	13.3438	108.41	94.3163	26.0898	16.9806
ENSG00000203288	TDRKH-AS1	TDRKH antisense RNA 1 [Source:HGNC Symbol;Acc:HGNC:40578]	chr1	151790804	151794402	1	q21.3	42.79	lncRNA	1141	6	-	40	3	13.7197	44.4616	148.841	17.5745	63.2174	66.3915	32.1331	56.5455	123.702	36.5352	49.6212	42.9092	77.7201	81.3115	50.6281	33.4726	29.2459	140.373	15.1124	49.0912	184.257	13.5991	189.529	36.7688	16.6381	324.117	55.1146	36.3723	50.0666	37.4849	12.5098	27.9141	134.477	0	83.5444
ENSG00000240498	CDKN2B-AS1	CDKN2B antisense RNA 1 [Source:HGNC Symbol;Acc:HGNC:34341]	chr9	21994139	22128103	1	p21.3	38.84	lncRNA	20420	5	[155]	33	3	367.86	155.616	11.2192	92.2661	714.548	213.803	615.315	3.427	3.04184	595.308	788.245	0	261.857	159.555	467.873	451.043	16.8008	0.825725	3.77811	156.29	133.399	280.637	214.867	534.229	171.134	153.956	228.564	348.293	229.616	0.720863	268.543	88.9356	492.27	2.08719	336.895
ENSG00000256802	ENSG00000256802	novel transcript, antisense to TJP1	chr15	29674990	29680957	1	q13.1	53.6	lncRNA	2736	5	-	41	3	78.0309	41.2858	0	406.85	53.639	31.5079	252.279	160.212	398.481	44.0571	95.9886	75.0911	43.045	3.06836	172.834	121.338	74.0481	34.6804	8.50074	83.1544	31.6821	259.62	146.961	74.6191	338.703	31.2541	17.8312	289.877	53.5195	0	175.137	12.9833	241.571	6.26156	71.3184
ENSG00000229921	KIF25-AS1	KIF25 antisense RNA 1 [Source:HGNC Symbol;Acc:HGNC:20953]	chr6	167992822	167997110	-1	q27	54.23	lncRNA	3121	5	-	42	3	0.857483	19.055	5.98357	122.143	36.3979	0	10.9389	0.85675	2.02789	0	0.813462	0	0	1.53418	0	0	0	17.3402	0.944527	0	0	1.23629	0	4.32574	0	0	0	7.71535	0	7.9295	0	0	2.43397	0	0
ENSG00000257702	LBX2-AS1	LBX2 antisense RNA 1 [Source:HGNC Symbol;Acc:HGNC:25136]	chr2	74502595	74504678	1	p13.1	60.7	lncRNA	2084	5	[156]	42	3	12.0048	563.181	116.68	96.6598	398.461	19.1298	53.3273	494.345	200.762	16.1184	770.349	301.556	224.791	765.556	10.4748	133.891	118.85	125.51	738.62	270.502	245.12	170.607	23.3111	25.9545	169.946	261.03	126.439	22.0438	270.187	51.9022	200.99	144.115	11.5613	363.171	67.9223
ENSG00000224805	LINC00853	long intergenic non-protein coding RNA 853 [Source:HGNC Symbol;Acc:HGNC:43716]	chr1	47179250	47180339	1	p33	56.06	lncRNA	661	5	-	43	3	12.0048	12.7033	0.747946	6.15107	5.74704	7.87696	5.46947	40.2673	12.1674	1.07456	8.94809	25.0304	9.56556	7.6709	34.9159	4.18408	18.0453	14.0373	7.55621	7.01302	11.6724	2.47257	19.257	0	2.37686	5.7878	7.29458	4.40877	2.58965	3.60432	16.6797	16.2291	17.0378	2.08719	10.8676
ENSG00000271856	LINC01215	long intergenic non-protein coding RNA 1215 [Source:HGNC Symbol;Acc:HGNC:49651]	chr3	108125821	108138610	1	q13.12	40.38	lncRNA	2592	5	[157]	38	3	0	1.05861	0	1.75745	9.5784	12.3781	15.041	12.8513	7.09763	25.7895	9.76155	1.19192	1.19569	19.9443	0	0	1.86676	29.7261	0	0	0.83374	0	87.1632	190.333	0	4.05146	3.24204	93.6863	1.72643	0	0	83.0931	83.3635	1.04359	4.75456
ENSG00000267014	LINC01532	long intergenic non-protein coding RNA 1532 [Source:HGNC Symbol;Acc:HGNC:51272]	chr19	29002319	29015160	1	q12	49.1	lncRNA	4426	5	-	40	3	0	1.05861	0	3.5149	0	0	0	0	0	215.987	0	0	0	0	0	0	0	3.3029	2.83358	0	0.83374	0	264.53	0	3.5653	0	0	20.9416	0	0	0	6.49165	7.9104	0	0
ENSG00000233338	TLR8-AS1	TLR8 antisense RNA 1 [Source:HGNC Symbol;Acc:HGNC:40720]	chrX	12902817	12908333	-1	p22.2	43.3	lncRNA	1349	5	[158]	36	3	24.867	0	0	0	114.941	3.37584	1.36737	0	20.2789	0	0.813462	0	0	0	0	0	1.2445	112.299	0	0	0	2.47257	0	0	0	10.9968	0	2.20438	0	12.2547	0	1.29833	0	1.04359	0
ENSG00000232684	ATP11A-AS1	ATP11A antisense RNA 1 [Source:HGNC Symbol;Acc:HGNC:40645]	chr13	112745449	112754693	-1	q34	49.52	lncRNA	2192	4	-	30	3	0	1.05861	0	0	7.66272	0	0.683683	2.57025	0	1.07456	0	0	0	1.53418	0	1.67363	0.622253	2.47717	0	0	0	0	0	2.16287	0	0	3.24204	4.40877	0.863217	0	0	0	0	3.13078	3.39611
ENSG00000249035	CLMAT3	colorectal liver metastasis associated transcript 3 [Source:HGNC Symbol;Acc:HGNC:52287]	chr5	151676945	151725473	1	q33.1	45.21	lncRNA	3087	4	-	34	3	1.71497	22.2308	1.49589	0	0	18.0045	4.1021	0	6.08368	15.0439	3.25385	25.0304	7.17417	0	1.7458	3.34726	4.35577	13.2116	4.72263	1.00186	0.83374	3.70885	2.02705	1.08144	0	16.7846	4.86306	14.3285	5.1793	0.720863	0	29.8616	17.6463	14.6103	6.11301
ENSG00000267665	ENSG00000267665	novel transcript	chr17	77516887	77536601	1	q25.3	49.89	lncRNA	7507	4	-	30	3	0.857483	0	0	3.5149	0	49.5123	0.683683	0	11.1534	0	0	0	27.501	6.13672	8.72898	0	0.622253	9.90869	1.88905	0	0	0	8.1082	7.57005	1.18843	33.5692	0	48.4965	24.1701	0	4.16992	0	2.43397	1.04359	24.452
ENSG00000224271	EPIC1	novel transcript	chr22	47630827	48023004	1	q13.31	43.89	lncRNA	33611	4	[159]	36	3	136.34	185.257	263.277	0.878725	1.91568	0	241.34	221.042	1.01395	0	1.62692	1.19192	1.19569	1.53418	357.888	0	184.187	42.112	564.827	414.77	6.66992	1.23629	289.868	1.08144	0	0	0	348.293	2.58965	82.1784	0	229.804	93.7078	1.04359	0.679223
ENSG00000189238	LINC00943	long intergenic non-protein coding RNA 943 [Source:HGNC Symbol;Acc:HGNC:48639]	chr12	126723412	126749027	1	q24.32	43.96	lncRNA	8927	4	-	30	3	2.57245	40.2272	0	0	38.3136	5.6264	0	119.945	0	29.0132	1.62693	2.38384	0	0	0	0	0.622253	317.078	306.027	12.0223	13.3398	0	2.02705	0	3.5653	0	0	11.0219	0.863217	0	64.2168	1.94749	0	32.3514	19.0182
ENSG00000256128	LINC00944	long intergenic non-protein coding RNA 944 [Source:HGNC Symbol;Acc:HGNC:48640]	chr12	126729787	126772519	-1	q24.32	40.86	lncRNA	5393	4	-	33	3	0	109.037	0.747946	0	70.8801	10.1275	0.683683	215.044	2.02789	36.5352	0.813462	5.95961	0	0	0	0	0.622253	440.111	304.138	14.026	61.6968	1.23629	13.1758	1.08144	10.6959	1.15756	0	38.5767	0	0	258.535	0.649165	0	69.9208	41.4326
ENSG00000223823	LINC01342	long intergenic non-protein coding RNA 1342 [Source:HGNC Symbol;Acc:HGNC:50551]	chr1	1137017	1144056	1	p36.33	65	lncRNA	1620	4	[160]	33	3	0	0	2.24384	0	28.7352	1.12528	3.41842	0	2.02789	1.07456	0	0	3.58708	0	0	2.51045	0	0	0	0	4.1687	0	0	5.40718	2.37686	5.7878	6.48407	4.40877	0	0	0	4.54415	0.608492	0	2.03767
ENSG00000238113	LINC01410	long intergenic non-protein coding RNA 1410 [Source:HGNC Symbol;Acc:HGNC:50702]	chr9	62801461	62813486	1	q13	40.99	lncRNA	4123	4	-	40	3	19.7221	101.627	4.48768	0.878725	42.145	129.407	196.217	12.8513	63.8787	61.2501	58.5693	307.516	107.612	55.2305	506.281	43.5144	22.4011	156.062	56.6716	7.01302	35.0171	64.2868	24.3246	71.3748	103.394	561.417	4.86306	3.30658	103.586	72.8072	300.234	175.924	259.826	7.30516	139.92
ENSG00000204904	LINC01545	long intergenic non-protein coding RNA 1545 [Source:HGNC Symbol;Acc:HGNC:17986]	chrX	46887417	46899703	-1	p11.3	42	lncRNA	532	4	-	38	3	1.71497	4.23444	1.49589	0	0	2.25056	10.2552	4.28375	0	1.07456	5.69424	0	1.19569	1.53418	6.98318	0	1.86676	0.825725	0	2.00372	0	1.23629	1.01353	0	5.94216	0.57878	6.48407	1.10219	3.45287	5.76691	2.50195	7.14081	1.21698	2.08719	0.679223
ENSG00000228952	LINC02041	long intergenic non-protein coding RNA 2041 [Source:HGNC Symbol;Acc:HGNC:52881]	chr3	187448845	187449450	1	q27.3	37.13	lncRNA	246	4	-	36	3	0	1.05861	0	0	0	0	4.78578	0	4.05579	0	0	0	20.3268	0	0	0	0	0	4.72263	0	4.1687	7.41771	0	0	0	3.47268	0	1.10219	0	1.44173	0	0.649165	3.04246	3.13078	0
ENSG00000259666	LINGO1-AS1	LINGO1 antisense RNA 1 [Source:HGNC Symbol;Acc:HGNC:27368]	chr15	77641764	77652292	1	q24.3	55.11	lncRNA	2730	4	-	42	3	0	0	1.49589	0	0	2.25056	0	0	0	0	0	0	0	0	1.7458	0	0.622253	0	0	0	0	0	2.02705	1.08144	2.37686	0	0.810509	18.7373	0	0	0	4.54415	1.21698	0	0
ENSG00000227533	SLC2A1-DT	SLC2A1 antisense RNA 1	chr1	42959049	42996814	1	p34.2		lncRNA		4	-	35	3	28.2969	39.1686	44.8768	16.6958	93.8683	216.054	122.379	132.796	44.6137	47.2808	8.94809	32.1819	50.2192	47.5596	8.72898	39.3303	39.8242	202.303	557.271	74.1377	377.684	16.0717	47.6357	27.0359	11.8843	27.7814	53.4936	103.606	10.3586	180.216	30.0234	381.06	356.577	28.177	48.9041
ENSG00000281398	SNHG4	small nucleolar RNA host gene 4 [Source:HGNC Symbol;Acc:HGNC:32964]	chr5	139274102	139284899	1	q31.2	43.34	lncRNA	4469	4	[161]	43	3	3177.83	3188.53	1370.98	1381.36	775.85	786.571	1424.11	878.169	746.265	4805.45	5176.88	2897.56	1424.07	1365.42	4305.13	1258.57	1301.75	924.812	833.072	1359.52	134.232	855.509	9669.03	3349.21	1674.5	928.364	1310.59	5790.92	3448.55	1756.02	4174.09	2272.73	8272.45	449.789	3303.74
ENSG00000255568	BRWD1-AS2	BRWD1 antisense RNA 2 [Source:HGNC Symbol;Acc:HGNC:16423]	chr21	39313935	39314962	1	q22.2	59.24	lncRNA	1028	3	-	35	3	20.5796	11.6447	27.674	12.3021	1.91568	30.3826	45.8068	12.8513	37.516	13.9693	13.0154	20.2627	9.56556	21.4785	17.458	14.2259	20.5343	30.5518	15.1124	28.0521	35.0171	11.1266	30.4058	41.0946	10.6959	9.83926	42.1465	17.6351	6.04252	9.37122	15.0117	4.54415	27.9906	14.6103	17.6598
ENSG00000233203	DHCR24-DT	DHCR24 divergent transcript [Source:HGNC Symbol;Acc:HGNC:53969]	chr1	54887563	54888850	1	p32.3	47.36	lncRNA	765	3	-	37	3	6.00238	1.05861	2.24384	3.5149	13.4098	2.25056	6.83683	11.1378	2.02789	5.37282	0.813462	22.6465	1.19569	7.6709	8.72898	0.836815	4.97802	1.65145	1.88905	2.00372	10.0049	0	9.12173	3.24431	0	2.8939	3.24204	5.51096	6.90574	5.04604	6.67188	12.3341	6.08492	4.17438	0.679223
ENSG00000225489	ENSG00000225489	novel transcript	chr9	6716157	6727438	1	p24.1	47.23	lncRNA	3177	3	-	34	3	5.1449	21.1722	227.376	28.1192	396.546	2.25056	9.57157	1.7135	15.2092	2.14913	0.813462	23.8384	44.2407	0	0	19.2467	3.73352	3.3029	2.83358	15.0279	226.777	25.962	3.04058	21.6287	13.0727	27.2027	12.9681	2.20438	132.072	4.32518	128.434	114.902	9.12739	49.0489	6.79223
ENSG00000255114	ENSG00000255114	novel transcript, antisense to HYOU1	chr11	119044188	119045493	1	q23.3	52.99	lncRNA	667	3	-	38	3	41.1592	71.9855	0	23.7256	0	0	65.6336	101.953	35.4881	54.8027	133.408	13.1111	15.544	406.558	6.98318	36.8199	52.2692	3.3029	35.892	1.00186	2.50122	64.2868	170.272	12.9772	0	4.63024	36.4729	39.6789	17.2644	38.2058	51.707	0	144.821	26.0898	92.3743
ENSG00000259163	ENSG00000259163	novel transcript, antisense to TTC7B	chr14	90642638	90648894	1	q32.11	44.83	lncRNA	1630	3	-	34	3	0	0	0	0	0	0	0	4.28375	0	3.22369	0	0	0	0	0	1.67363	0	0	2.83358	1.00186	0.83374	0	0	0	2.37686	0	0.810509	0	1.72643	0	0	0.649165	0	1.04359	3.39611
ENSG00000260920	ENSG00000260920	novel transcript, sense overlapping with ZNF643	chr1	40464319	40466767	1	p34.2	37.89	lncRNA	2449	3	-	34	3	735.72	118.564	233.359	64.1469	147.507	248.687	90.2462	142.221	82.1297	134.32	721.541	90.5861	227.182	50.6279	609.283	112.133	255.124	71.0123	77.4512	158.294	166.748	77.886	271.625	122.202	535.983	320.065	138.597	199.497	89.7746	520.463	204.326	64.9165	132.043	217.068	611.98
ENSG00000270460	ENSG00000270460	novel transcript	chr2	173811076	173811392	1	q31.1	42.27	lncRNA	317	3	-	39	3	0	0	0	0	9.5784	0	0	0	0	0	6.5077	0	0	1.53418	0	0	1.2445	0.825725	0	1.00186	3.33496	0	0	0	0	0	0	7.71535	0	0	0	0	0	5.21797	9.50912
ENSG00000278238	ENSG00000278238	novel transcript	chr13	52454775	52455331	-1	q14.3	45.06	lncRNA	557	3	-	40	3	35.1568	61.3994	192.97	14.0596	13.4098	56.264	62.2152	22.2755	59.8229	29.0132	31.725	39.3334	22.7182	35.2861	22.6954	30.9622	28.0014	108.996	14.1679	51.0949	35.0171	35.8523	25.3381	11.8958	8.31902	68.8748	30.7994	35.2702	96.6803	48.2978	195.986	40.2482	37.7265	53.2233	11.5468
ENSG00000249042	FAM151B-DT	FAM151B divergent transcript	chr5	80411231	80488095	-1	q14.1		lncRNA		3	-	33	3	223.803	206.429	1230.37	284.707	411.871	369.092	373.291	311.857	216.985	118.202	41.4866	1153.78	585.89	210.183	1476.94	117.154	274.413	602.779	128.456	220.409	181.755	281.873	878.726	272.522	694.044	463.024	713.248	242.482	249.47	185.262	295.231	153.852	263.477	551.018	127.694
ENSG00000251018	HMMR-AS1	HMMR antisense RNA 1 [Source:HGNC Symbol;Acc:HGNC:49149]	chr5	163483065	163494058	-1	q34	37.64	lncRNA	957	3	[162]	41	3	0	0	0	0	0	0	0.683683	0.85675	1.01395	2.14913	0.813462	0	0	0	0	0	1.2445	0	0	1.00186	0	0	0	0	0	0	0	0	0.863217	0	2.50195	0	0	0	0
ENSG00000237978	KCNMB2-AS1	KCNMB2 antisense RNA 1 [Source:HGNC Symbol;Acc:HGNC:51409]	chr3	178526505	178937352	-1	q26.32	38.08	lncRNA	4745	3	-	34	3	0.857483	28.5825	35.1535	10.5447	111.109	97.8994	214.677	2.57025	0	11.8202	0	1.19192	4.78278	21.4785	0	0.836815	2.48901	249.369	17.0015	5.0093	91.7114	2.47257	14.1894	24.873	0	0.57878	14.5892	89.2776	1.72643	65.5986	0	58.4248	59.6322	22.9591	148.75
ENSG00000224514	LINC00620	long intergenic non-protein coding RNA 620 [Source:HGNC Symbol;Acc:HGNC:44223]	chr3	13650696	13746638	1	p25.1	48.79	lncRNA	1045	3	-	31	3	6.00238	0	0	7.0298	0	3.37584	0	0	4.05579	0	0	0	0	0	3.49159	0	14.3118	0	0	2.00372	0	0	2.02705	1.08144	0	0	5.67356	4.40877	0	0	0.833985	1.94749	0	4.17438	0.679223
ENSG00000265933	LINC00668	long intergenic non-protein coding RNA 668 [Source:HGNC Symbol;Acc:HGNC:44328]	chr18	6919496	6929966	-1	p11.31	46.01	lncRNA	4866	3	-	29	3	7.71734	318.642	0	653.771	279.689	5.6264	486.099	0	53.7392	368.575	0	0	399.362	49.0937	0	0.836815	7.46703	11.5601	143.568	3.00558	556.105	0	16.2164	461.773	503.895	0	31.6099	78.2557	0	0	0	1908.54	1.21698	7.30516	44.1495
ENSG00000267535	LINC00868	long intergenic non-protein coding RNA 868 [Source:HGNC Symbol;Acc:HGNC:27562]	chr17	76849840	76861836	1	q25.2	48.65	lncRNA	1383	3	-	41	3	0	0	0	0	0	10.1275	0	0	1.01395	0	0	1.19192	0	46.0254	0	0	0	0	0	0	0	0	0	0	0	1.15756	36.4729	17.6351	0	0	0	13.6325	0.608492	0	0
ENSG00000249937	LINC02223	long intergenic non-protein coding RNA 2223	chr5	17684584	17955857	1	p15.1		lncRNA		3	-	30	3	3.42993	2.11722	6.73151	0	0	5.6264	8.88788	7.71075	16.2232	2.14913	0	0	0	0	0	0	0	2.47717	22.6686	0	1.66748	0	7.09468	22.7101	0	0	0	9.91973	1.72643	0	0	45.4415	1.21698	50.0925	46.1872
ENSG00000238042	LINC02257	long intergenic non-protein coding RNA 2257 [Source:HGNC Symbol;Acc:HGNC:53159]	chr1	221880981	221978523	-1	q41	41.3	lncRNA	998	3	-	39	3	0	0	0	0	0	3.37584	0	0	0	0	0	0	8.36986	0	0	0.836815	0	0	2.83358	7.01302	0	1.23629	0	0	0	5.20902	0	1.10219	0	0	0	2.59666	0	5.21797	0
ENSG00000264589	MAPT-AS1	MAPT antisense RNA 1 [Source:HGNC Symbol;Acc:HGNC:43738]	chr17	45799390	45895680	-1	q21.31	51.8	lncRNA	7356	3	-	33	3	1.71497	0	0	0	0	3.37584	2.73473	0	70.9763	1.07456	0	22.6465	2.39139	0	1.7458	0	0	2.47717	2.83358	5.0093	0	0	2.02705	21.6287	0	1.73634	0.810509	1.10219	0	0	0	0	0	0	0
ENSG00000272455	MRPL20-DT	MRPL20 divergent transcript [Source:HGNC Symbol;Acc:HGNC:54814]	chr1	1409096	1410618	1	p36.33	49.44	lncRNA	1523	3	-	37	3	215.228	176.788	159.312	34.2703	204.978	195.799	294.668	65.113	127.757	343.86	170.827	200.243	172.18	125.803	206.004	177.405	304.904	177.531	222.908	196.365	107.552	114.975	838.186	681.304	229.367	205.467	148.323	870.732	135.525	175.17	282.721	286.282	658.389	75.1388	160.297
ENSG00000223482	NUTM2A-AS1	NUTM2A antisense RNA 1 [Source:HGNC Symbol;Acc:HGNC:45161]	chr10	87201647	87342612	-1	q23.2	41.08	lncRNA	22452	3	-	32	3	1095.01	1579.45	1810.03	1065.02	4471.2	926.106	2643.12	1341.67	1881.88	1782.7	1761.96	2001.24	1192.11	1304.05	2468.55	2005.01	1177.92	2645.62	1180.66	1298.41	1333.15	2000.31	2208.47	2140.16	1833.75	1096.21	2611.46	1923.33	1935.33	2306.04	2476.93	1700.81	2203.35	793.131	2070.27
ENSG00000225255	PSLNR	prostate enriched lncRNA [Source:HGNC Symbol;Acc:HGNC:54405]	chr22	15746630	15778297	1	q11.1	44.3	lncRNA	855	3	-	33	3	0	0	8.97535	7.90853	0	22.5056	6.15315	0	31.4323	4.29825	0	3.57577	0	0	0	0	0	1.65145	2.83358	0	0	0	12.1623	3.24431	0	0.57878	0	1.10219	13.8115	0	0	0	1.82548	0	0.679223
ENSG00000228016	RAPGEF4-AS1	RAPGEF4 antisense RNA 1 [Source:HGNC Symbol;Acc:HGNC:28081]	chr2	172677141	172736206	-1	q31.1	41.76	lncRNA	5217	3	-	33	3	0	0	8.22741	0	0	0	4.78578	0	0	1.07456	0	0	0	1.53418	0	0.836815	0	0.825725	9.44527	2.00372	0	0	1.01353	1.08144	0	0	0	0	0	0.720863	0	0	0.608492	6.26156	2.03767
ENSG00000260442	ATP2A1-AS1	ATP2A1 antisense RNA 1 [Source:HGNC Symbol;Acc:HGNC:51370]	chr16	28878957	28879920	-1	p11.2	59.34	lncRNA	583	10	[163]	55	4	255.53	16.9378	430.069	66.7831	22.9882	28.132	94.3483	0.85675	32.4463	20.4167	48.8077	9.53538	62.1761	84.3799	94.273	48.5353	97.6937	27.2489	23.6132	99.1842	26.6797	51.924	49.6627	41.0946	57.0448	61.3507	24.3153	22.0438	50.0666	128.314	110.92	20.7733	56.5898	55.3105	25.8105
ENSG00000234753	FOXP4-AS1	FOXP4 antisense RNA 1 [Source:HGNC Symbol;Acc:HGNC:50332]	chr6	41494853	41548621	-1	p21.1	51.42	lncRNA	934	10	[164]	56	4	18.0071	7.41027	61.3316	4.39363	30.6509	4.50112	1.36737	17.135	5.06973	3.22369	21.15	17.8788	8.36986	0	12.2206	4.18408	10.5783	2.47717	1.88905	18.0335	7.50366	8.654	15.2029	0	4.75373	6.36658	5.67356	8.81754	6.90574	5.04604	55.043	6.49165	1.21698	3.13078	14.2637
ENSG00000234327	ZNF232-AS1	ZNF232 antisense RNA 1 [Source:HGNC Symbol;Acc:HGNC:40623]	chr17	5111468	5115004	1	p13.2	48.26	lncRNA	2006	10	-	57	4	174.069	27.5239	440.54	20.2107	521.065	114.779	166.819	139.65	69.9623	25.7895	579.185	419.557	60.9804	147.281	89.0356	80.3343	208.455	47.892	445.817	182.339	221.775	159.481	389.194	59.479	41.5951	1082.9	28.3678	159.818	506.709	148.498	329.424	36.3532	706.46	35.4822	150.108
ENSG00000235919	ASH1L-AS1	ASH1L antisense RNA 1 [Source:HGNC Symbol;Acc:HGNC:44146]	chr1	155562042	155563944	1	q22	62.06	lncRNA	1209	7	-	48	4	115.76	145.03	154.825	171.351	128.351	156.414	110.757	112.234	180.482	270.79	101.683	71.5153	31.0881	67.5039	45.3907	123.849	84.0041	206.431	121.844	110.205	116.724	91.4851	280.747	111.388	28.5224	172.476	98.0716	396.789	111.355	119.663	127.6	127.236	144.213	85.5747	100.525
ENSG00000185904	LINC00839	long intergenic non-protein coding RNA 839 [Source:HGNC Symbol;Acc:HGNC:28269]	chr10	42475480	42495337	1	q11.21	43.45	lncRNA	8423	7	- (en otros cánceres https://www.ncbi.nlm.nih.gov/pmc/articles/PMC8751606/)	50	4	1343.68	2393.52	0	731.099	22.9882	1341.33	218.779	358.122	73.0042	1627.96	245.666	760.446	196.094	96.6533	3341.45	138.075	1298.02	78.4438	968.14	846.572	0	11.1266	2255.09	935.442	1612.7	91.4473	1136.33	450.797	3090.32	1.44173	0	27.9141	5491.64	693.99	931.894
ENSG00000234807	LINC01135	long intergenic non-protein coding RNA 1135 [Source:HGNC Symbol;Acc:HGNC:49450]	chr1	58785128	58901109	1	p32.1	43.07	lncRNA	5017	7	[165]	48	4	0	7.41027	19.4466	1.75745	19.1568	20.2551	259.8	32.5565	96.3249	2.14913	60.1962	67.9396	38.2622	49.0937	3.49159	11.7154	18.0453	124.684	24.5577	28.0521	6.66992	19.7806	145.948	21.6287	8.31902	150.483	5.67356	221.541	17.2644	1.44173	10.8418	76.6014	40.1605	10.4359	41.4326
ENSG00000253948	VPS13B-DT	VPS13B divergent transcript	chr8	98957575	99013743	-1	q22.2		lncRNA		7	-	57	4	98.6105	39.1686	129.395	50.0873	93.8683	55.1387	65.6336	29.1295	25.3487	10.7456	56.9424	63.1719	31.0881	35.2861	45.3907	37.6567	66.581	102.39	29.2803	27.0502	89.2102	67.9957	95.2714	87.5963	9.50746	78.7141	30.7994	106.913	34.5287	74.2489	39.1973	83.0931	160.642	83.4875	114.789
ENSG00000234171	RNASEH1-AS1	RNASEH1 antisense RNA 1 [Source:HGNC Symbol;Acc:HGNC:49289]	chr2	3558474	3564842	1	p25.3	47.56	lncRNA	4377	6	[139]	55	4	431.314	203.253	682.127	478.905	239.46	406.226	760.939	651.13	877.064	606.054	2237.84	613.84	445.994	589.125	342.176	318.827	602.963	684.526	223.853	306.569	520.254	965.539	776.36	444.47	418.328	1517.56	282.868	330.658	713.881	766.999	653.01	263.561	1125.1	366.301	731.523
ENSG00000163081	CCDC140	CCDC140 long non-coding RNA [Source:HGNC Symbol;Acc:HGNC:26514]	chr2	222298147	222305217	1	q36.1	54.01	lncRNA	1932	5	-	52	4	11.1473	0	0	0	0	0	0	0	0	0	0	0	0	0	0	0	0	0	0	15.0279	0	0	0	0	0	0	0	0	0	113.176	10.0078	0	0	0	0.679223
ENSG00000255517	DPP3-DT	DPP3 divergent transcript	chr11	66473490	66480269	-1	q13.2		lncRNA		5	-	58	4	127.765	53.9891	131.638	77.3278	298.846	200.3	175.707	105.38	136.883	41.908	183.843	185.94	135.113	101.256	89.0356	52.7194	140.629	273.315	172.848	92.1711	180.922	160.717	128.718	169.785	23.7686	287.075	76.1879	93.6863	18.1276	54.7856	67.5528	108.41	238.529	75.1388	120.222
ENSG00000236081	ELFN1-AS1	ELFN1 antisense RNA 1 [Source:HGNC Symbol;Acc:HGNC:39071]	chr7	1738630	1742291	-1	p22.3	60.9	lncRNA	989	5	[166]	46	4	1.71497	0	2.99178	322.492	44.0606	2.25056	2.05105	0.85675	0	10.7456	979.409	0	38.2622	1.53418	0	0	0.622253	0.825725	0	0	113.389	8.654	1.01353	0	0	78.1353	0	0	625.832	3.60432	203.492	10.3866	0	0	242.483
ENSG00000232586	KIAA1614-AS1	KIAA1614 antisense RNA 1 [Source:HGNC Symbol;Acc:HGNC:50644]	chr1	180949699	180954887	-1	q25.3	57.6	lncRNA	1440	5	-	53	4	27.4395	24.348	14.211	27.2405	0	283.571	147.676	95.0993	79.0879	31.1623	125.273	10.7273	32.2837	76.709	6.98318	17.5731	84.0041	41.2862	40.6146	50.093	102.55	35.8523	46.6222	30.2802	21.3918	28.3602	40.5255	92.5841	24.1701	32.4389	17.5137	15.58	67.5426	28.177	91.0159
ENSG00000224286	LINC01142	long intergenic non-protein coding RNA 1142 [Source:HGNC Symbol;Acc:HGNC:49456]	chr1	170271395	170284277	-1	q24.2	38.03	lncRNA	1804	5	-	52	4	0	0	0	0	0	1.12528	0	0	0	0	0	0	0	0	0	0	0.622253	0	0.944527	0	0	0	0	0	0	0	0	0	0	0	0	0	1.82548	0	0
ENSG00000272142	LYRM4-AS1	LYRM4 antisense RNA 1 [Source:NCBI gene (formerly Entrezgene);Acc:100129461]	chr6	5003774	5045666	1	p25.1	45.44	lncRNA	4662	5	-	53	4	88.3207	165.143	43.3809	103.69	130.266	122.656	216.044	57.4023	67.9344	47.2808	89.4809	29.7981	90.8728	41.4228	275.836	163.179	135.651	97.4355	164.348	177.329	70.0342	164.426	54.7304	71.3748	38.0298	181.158	262.605	192.884	105.312	278.253	177.639	94.778	97.9673	91.8363	118.864
ENSG00000234883	MIR155HG	MIR155 host gene [Source:HGNC Symbol;Acc:HGNC:35460]	chr21	25561909	25575168	1	q21.3	37.7	lncRNA	1603	5	[167]	57	4	2.57245	120.682	0	0	5.74704	5.6264	2.05105	2.57025	11.1534	7.52194	190.35	115.617	14.3483	1.53418	1.7458	328.868	0.622253	48.7178	26.4468	5.0093	3.33496	2.47257	5.06763	9.73292	53.4794	49.1963	4.86306	24.2482	250.333	4.32518	22.5176	0	63.8917	20.8719	8.8299
ENSG00000266835	GAPLINC	gastric adenocarcinoma associated, positive CD44 regulator, long intergenic non-coding RNA [Source:HGNC Symbol;Acc:HGNC:51308]	chr18	3466250	3478978	1	p11.31	45.64	lncRNA	1051	4	-	57	4	2.57245	32.8169	0	6.15107	0	1.12528	1.36737	5.1405	1.01395	0	151.304	7.15153	1.19569	1.53418	3.49159	3.34726	2.48901	0	1.88905	0	6.66992	9.89028	1.01353	1.08144	15.4496	0	14.5892	0	0	2.16259	1.66797	40.2482	0	3.13078	0
ENSG00000227039	ITGB2-AS1	ITGB2 antisense RNA 1 [Source:HGNC Symbol;Acc:HGNC:44304]	chr21	44921051	44929678	1	q22.3	49.14	lncRNA	2438	4	[168]	56	4	0.857483	7.41027	0	69.4193	24.9038	166.542	1.36737	4.28375	41.5718	4.29825	3.25385	226.465	504.583	254.674	0	23.4308	3.11126	197.348	28.3358	11.0205	24.1785	37.0885	49.6627	12.9772	35.653	473.442	169.397	36.3723	63.8781	12.9755	80.8965	262.262	6.69342	214.98	3575.43
ENSG00000249343	LINC01333	long intergenic non-protein coding RNA 1333 [Source:HGNC Symbol;Acc:HGNC:50539]	chr5	74321293	74341236	1	q13.3	42.52	lncRNA	3599	4	-	54	4	0	0	0	0	0	0	0	0	0	2.14913	0	0	0	0	0	0	0	0	0	0	0	0	0	0	0	0	0	0	0	1.44173	0	0	2.43397	0	0
ENSG00000230817	LINC01362	long intergenic non-protein coding RNA 1362 [Source:HGNC Symbol;Acc:HGNC:50596]	chr1	82903183	83166815	1	p31.1	37.03	lncRNA	2155	4	-	56	4	0	0	0	0	0	0	0	0	0	0	0	0	0	0	5.23739	0	0	0	0	0	0	0	0	0	0	0	0	0	0	0	0	0	0	0	0
ENSG00000183250	LINC01547	long intergenic non-protein coding RNA 1547 [Source:HGNC Symbol;Acc:HGNC:15707]	chr21	44932814	44939937	-1	q22.3	54.39	lncRNA	4946	4	-	58	4	195.506	59.2822	118.175	337.43	97.6996	555.889	402.006	59.1158	318.379	203.093	210.687	184.748	221.203	405.023	263.615	65.2716	642.165	217.991	177.571	108.201	324.325	75.4134	83.1091	459.61	168.757	189.261	393.908	216.03	198.54	245.814	542.924	479.084	179.505	589.631	757.334
ENSG00000232233	LINC02043	long intergenic non-protein coding RNA 2043 [Source:HGNC Symbol;Acc:HGNC:52883]	chr3	186810880	186825521	-1	q27.3	48.6	lncRNA	1832	4	-	46	4	4.28741	6.35166	0	2.63618	0	6.75168	9.57157	7.71075	4.05579	12.8948	17.0827	59.5961	28.6967	3.06836	6.98318	5.85771	4.35577	8.25725	9.44527	10.0186	2.50122	2.47257	11.1488	30.2802	9.50746	49.1963	64.8407	0	6.04252	3.60432	75.8926	0.649165	40.769	4.17438	21.0559
ENSG00000250590	LINC02492	long intergenic non-protein coding RNA 2492 [Source:HGNC Symbol;Acc:HGNC:53476]	chr4	187532873	187672755	-1	q35.2	38.06	lncRNA	2970	4	-	48	4	0.857483	0	0	0	0	2.25056	40.3373	0	0	0	0	0	9.56556	144.213	0	0	15.5563	0.825725	15.1124	0	0	0	0	0	0	0	0	0	0	0	0	0	0	0	31.9235
ENSG00000237310	LINC03011	Long intergenic non-protein coding RNA 3011	chr7	66493607	66495758	1	q11.21	53.07	lncRNA	1262	4	-	50	4	146.63	23.2894	221.392	130.051	78.5429	61.8904	34.8678	46.2645	209.887	13.9693	91.9213	183.556	77.7201	93.5849	80.3066	33.4726	80.8929	74.3152	45.3373	44.0819	83.374	90.2488	166.218	33.5245	20.2034	231.512	42.1465	56.2118	19.854	119.663	238.52	88.9356	189.241	48.0053	185.428
ENSG00000253716	MINCR	MYC-induced long non-coding RNA [Source:HGNC Symbol;Acc:HGNC:51653]	chr8	143280161	143281690	-1	q24.3	49.93	lncRNA	1530	4	-	58	4	149.202	141.854	238.595	96.6598	247.123	41.6354	209.891	84.8183	169.329	97.7853	122.019	170.445	71.7417	105.858	214.733	121.338	116.361	398.825	273.913	142.264	340.166	161.953	531.087	147.075	93.8861	254.084	136.166	445.286	195.95	178.774	238.52	439.485	253.741	84.5311	187.465
ENSG00000255043	NAV2-AS5	NAV2 antisense RNA 5 [Source:HGNC Symbol;Acc:HGNC:40740]	chr11	19502672	19507229	-1	p15.1	43.92	lncRNA	3510	4	-	55	4	0	0	2.24384	0	0	1.12528	0	0	0	0	0	0	0	0	0	2.51045	0	0	3.77811	0	0	0	0	0	2.37686	0	2.43153	0	0.863217	0	0	0	6.08492	0	0
ENSG00000251321	PCAT4	prostate cancer associated transcript 4 [Source:HGNC Symbol;Acc:HGNC:24853]	chr4	79827471	79877770	1	q21.21	35.6	lncRNA	2247	4	-	57	4	0	0	0	0	0	0	0	0	0	0	0	0	0	0	1.7458	0	0	0	0	0	0	0	0	0	0	0	0	0	0	0	0	0	0	0	0
ENSG00000256940	PPP1R14B-AS1	PPP1R14B antisense RNA 1	chr11	64245942	64248218	1	q13.1		lncRNA		4	-	52	4	52.3064	97.3922	59.8357	89.63	137.929	482.745	176.39	171.35	316.351	20.4167	518.989	820.043	182.941	504.745	38.4075	27.6149	90.2267	161.842	122.788	156.29	240.117	579.818	100.339	85.4334	60.61	674.858	273.952	67.2337	222.71	23.0676	213.5	130.482	589.021	147.147	171.843
ENSG00000230082	PRRT3-AS1	PRRT3 antisense RNA 1 [Source:HGNC Symbol;Acc:HGNC:41151]	chr3	9947404	9954787	1	p25.3	54.05	lncRNA	614	4	-	49	4	1.71497	4.23444	1.49589	0	47.892	4.50112	56.062	4.28375	121.674	1.07456	0.813462	0	15.544	1.53418	3.49159	20.9204	3.73352	10.7344	18.8905	7.01302	6.66992	91.4851	5.06763	1.08144	21.3918	76.9778	0.810509	22.0438	106.176	1.44173	78.3945	20.1241	7.30191	16.6975	58.4132
ENSG00000236024	PRRX2-AS1	PRRX2 antisense RNA 1 [Source:HGNC Symbol;Acc:HGNC:50684]	chr9	129712896	129718635	-1	q34.11	50.71	lncRNA	429	4	-	44	4	0	2.11722	0	0	28.7352	0	0	0	0	0	0	0	0	0	0	0	0	0	0	0	0	0	1.01353	1.08144	0	0	0.810509	0	0	0	0.833985	0	0.608492	0	0
ENSG00000236977	ANKRD44-IT1	ANKRD44 intronic transcript 1 [Source:HGNC Symbol;Acc:HGNC:41477]	chr2	197250858	197302519	-1	q33.1	40.66	lncRNA	1069	3	-	53	4	0	0	0	0	0	0	0	0	0	0	0.813462	0	0	0	0	0	0.622253	0	1.88905	0	0	0	0	0	0	0	0	0	0	0	0	0	0	0	0
ENSG00000268001	CARD8-AS1	CARD8 antisense RNA 1	chr19	48255675	48258199	1	q13.33		lncRNA		3	-	52	4	11.1473	103.744	62.8275	28.1192	45.9763	276.819	118.277	83.9616	83.1436	127.873	1212.87	89.3942	53.8062	398.887	36.6617	56.9034	24.2679	56.1493	61.3942	22.0409	100.883	123.629	23.3111	78.9448	29.7108	157.428	124.008	164.227	143.294	28.8345	29.1895	40.8974	25.5567	116.882	417.043
ENSG00000231163	CSMD2-AS1	CSMD2 antisense RNA 1 [Source:HGNC Symbol;Acc:HGNC:40882]	chr1	33868953	33893726	1	p35.1	42.56	lncRNA	2619	3	-	57	4	0	0	0	0	0	0	0	0	0	0	0	0	0	0	0	0	0	0	0	0	0	0	0	0	0	0	0	0	0	0	0	0	0	0	0
ENSG00000231971	CT69	cancer/testis associated transcript 69	chr6	134428239	134520585	-1	q23.2		lncRNA		3	-	54	4	2.57245	0	0	0	32.5665	2.25056	0	0.85675	1.01395	0	0	0	0	3.06836	172.834	0	0	0	178.516	0	0	0	2.02705	6.48861	4.75373	2.8939	0	3.30658	0	0	0	2.59666	0	5.21797	0
ENSG00000261431	DHX35-DT	DHX35 divergent transcript [Source:HGNC Symbol;Acc:HGNC:55365]	chr20	38961925	38962111	-1	q11.23	55.08	lncRNA	187	3	-	54	4	0	0	2.24384	0	0	0	1.36737	1.7135	2.02789	0	1.62692	1.19192	0	0	0	0	0.622253	0	0	0	0	1.23629	8.1082	1.08144	0	1.15756	0.810509	0	0	1.44173	3.33594	0	4.86794	0	1.35845
ENSG00000248730	EGFLAM-AS4	EGFLAM antisense RNA 4 [Source:HGNC Symbol;Acc:HGNC:41166]	chr5	38282264	38290986	-1	p13.2	42.02	lncRNA	1579	3	-	54	4	0	2.11722	0	0	0	0	0	0	0	0	0	0	0	0	0	0	0	1.65145	0	0	0	0	1.01353	0	0	0	0	0	0	0	0	0	0	0	0
ENSG00000224504	ENSG00000224504	novel transcript	chr10	85432863	85448961	1	q23.1	42.99	lncRNA	2672	3	-	58	4	0	0	0	0	0	0	0	0	0	0	0	0	0	0	0	0	0	0	0	0	0	0	0	0	0	0	0	0	0	0	0	0	0	0	0
ENSG00000226334	ENSG00000226334	novel transcript	chr9	104927553	104928892	1	q31.1	60.37	lncRNA	469	3	-	55	4	0	28.5825	1.49589	3.5149	0	3.37584	4.1021	41.9808	0	0	0	0	0	0	1.7458	1.67363	7.46703	0	1.88905	0	0	4.94514	0	0	0	0	0	3.30658	0	2.16259	6.67188	0	0	7.30516	2.03767
ENSG00000226527	ENSG00000226527	novel transcript	chr21	33110867	33123725	-1	q22.11	45.49	lncRNA	2508	3	-	48	4	0	0	5.23562	0	0	0	0	0.85675	2.02789	1.07456	0	0	1.19569	0	0	0	0	0	0	0	0.83374	0	0	0	0	0	0	0	0	0	0.833985	0	0	0	0
ENSG00000231295	ENSG00000231295	novel transcript	chr7	120746738	120752514	-1	q31.31	32.77	lncRNA	547	3	-	52	4	0	0	0	0	0	0	0	0	0	0	0	0	14.3483	0	0	0	0	0	0	0	0	0	1.01353	0	0	0.57878	0	8.81754	0	0	0	0	0	0	0
ENSG00000232386	ENSG00000232386	novel transcript	chr15	100849561	100861756	1	q26.3	47.93	lncRNA	1479	3	-	54	4	0	110.096	9.7233	3.5149	51.7233	47.2618	0.683683	0.85675	52.7252	1.07456	0	66.7476	98.0469	36.8203	0	7.53134	1.86676	60.2779	9.44527	23.0428	0	21.0169	20.2705	10.8144	24.9571	63.087	16.2102	2.20438	57.8356	0	27.5215	68.1623	54.7643	58.4413	3.39611
ENSG00000233461	ENSG00000233461	novel transcript	chr1	231520729	231528618	-1	q42.2	41.6	lncRNA	4472	3	-	46	4	114.903	223.367	396.411	233.741	2854.36	237.434	582.498	300.719	311.282	46.2062	683.308	1241.98	3584.69	915.905	104.748	235.982	382.685	194.871	223.853	123.229	368.513	462.371	553.385	191.414	336.326	715.951	1129.04	331.76	906.378	307.088	236.852	233.05	887.182	104.359	55.0171
ENSG00000234694	ENSG00000234694	novel transcript	chr1	43354684	43358658	-1	p34.2	47.42	lncRNA	661	3	-	56	4	19.7221	31.7583	58.3398	14.0596	26.8195	13.5034	288.514	36.8403	41.5718	7.52194	91.1078	75.0911	58.589	41.4228	3.49159	10.0418	14.9341	80.0953	61.3942	29.054	69.2005	19.7806	174.326	11.8958	2.37686	134.277	18.6417	13.2263	7.76896	15.1381	41.6992	94.778	20.0802	8.34875	18.339
ENSG00000243224	ENSG00000243224	novel transcript, antisense to TWF2	chr3	52239258	52241097	1	p21.2	54.35	lncRNA	1101	3	-	57	4	39.4442	40.2272	35.9014	30.7554	9.5784	24.7562	42.3884	35.1268	4.05579	54.8027	27.6577	8.34346	5.97847	21.4785	8.72898	16.7363	36.0907	14.0373	79.3402	45.0837	25.8459	25.962	34.4599	17.303	9.50746	41.0934	15.3997	29.7592	9.49539	23.0676	31.6914	136.974	10.3444	19.8283	9.50912
ENSG00000244184	ENSG00000244184	novel transcript	chr17	4704230	4705529	1	p13.2	50.54	lncRNA	472	3	-	58	4	12.8622	5.29305	12.7151	7.0298	40.2293	9.00224	15.041	9.42426	9.12552	12.8948	29.2846	11.9192	1.19569	6.13672	3.49159	1.67363	15.5563	20.6431	14.1679	15.0279	10.0049	6.18142	9.12173	4.32574	1.18843	53.2478	9.72611	8.81754	10.3586	13.6964	16.6797	11.0358	20.0802	2.08719	6.11301
ENSG00000253174	ENSG00000253174	novel transcript, antisense to GINS4	chr8	41540381	41545044	-1	p11.21	48.65	lncRNA	1189	3	-	47	4	194.649	423.444	192.97	316.341	189.652	250.938	352.781	287.868	166.287	78.4431	238.345	1207.42	63.3718	49.0937	146.647	228.451	164.275	82.5725	60.4497	283.526	95.0464	145.882	116.555	151.401	371.979	274.342	153.997	95.8907	308.169	274.649	322.752	136.974	214.798	170.106	61.8093
ENSG00000261071	ENSG00000261071	novel transcript, antisense to NOL7	chr6	13614111	13615155	-1	p23	54.16	lncRNA	1045	3	[169]	58	4	76.316	19.055	14.211	26.3618	53.639	16.8792	33.5005	15.4215	33.4602	18.2676	57.7558	0	8.36986	26.0811	6.98318	9.20497	28.6236	4.12862	8.50074	55.1023	2.50122	25.962	30.4058	10.8144	0	0	1.62102	22.0438	34.5287	18.7425	62.5488	0	18.8633	15.6539	6.79223
ENSG00000261095	ENSG00000261095	novel transcript, antisense to C16orf95	chr16	87212122	87226430	1	q24.2	49.26	lncRNA	1447	3	-	52	4	0.857483	0	0	0	0	0	0	0	0	0	0	0	0	0	0	0	0	0	0	0	0	0	0	0	0	0	0.810509	1.10219	0	0	0	0	0	1.04359	0
ENSG00000265415	ENSG00000265415	novel transcript, antisense to PRR11	chr17	59202677	59203829	-1	q22	45.88	lncRNA	321	3	-	56	4	5.1449	1.05861	4.48768	2.63618	7.66272	0	5.46947	13.708	0	11.8202	5.69424	0	4.78278	15.3418	0	0	4.97802	1.65145	0.944527	0	1.66748	12.3628	4.0541	2.16287	0	1.15756	1.62102	0	6.90574	2.88345	7.50586	0	4.86794	8.34875	4.75456
ENSG00000267512	ENSG00000267512	novel transcript, antisense to NACC1	chr19	13139617	13141147	-1	p13.13	61.01	lncRNA	458	3	-	57	4	12.8622	62.458	0	0	36.3979	0	79.9909	0	14.1952	0	21.9635	0	29.8924	10.7393	0	114.644	54.136	10.7344	2.83358	0	7.50366	23.4894	39.5275	0	11.8843	0	222.89	2.20438	35.3919	0	27.5215	0	0	89.7491	0
ENSG00000267698	ENSG00000267698	novel transcript, antisense to CLIP3 and THAP8	chr19	36014508	36045972	1	q13.12	51.74	lncRNA	643	3	-	44	4	21.4371	6.35166	41.885	40.4213	11.4941	20.2551	65.6336	60.8293	54.7531	42.9825	43.927	48.8688	31.0881	67.5039	17.458	42.6776	32.9794	28.9004	36.8365	20.0372	21.6773	43.27	44.5951	22.7101	22.5802	52.669	8.10509	16.5329	12.085	25.2302	44.2012	9.73747	12.1699	11.4795	20.3767
ENSG00000269399	ENSG00000269399	novel transcript	chr19	16542746	16544814	1	p13.11	47.66	lncRNA	2069	3	-	54	4	49.734	37.0514	42.6329	21.0894	26.8195	79.8949	83.4094	29.9863	118.632	76.294	54.502	85.8184	45.4364	27.6152	76.815	87.8656	18.0453	92.4811	59.5052	97.1804	10.0049	42.0337	625.345	96.2478	78.4365	82.1868	59.1672	131.161	66.4677	78.5741	105.082	86.3389	205.062	29.2206	65.2054
ENSG00000269968	ENSG00000269968	novel transcript, antisense to GAPDH	chr12	6537794	6538370	-1	p13.31	56.5	lncRNA	422	3	-	51	4	896.07	3888.28	1489.91	1789.08	915.695	725.806	1079.54	1818.88	636.759	1394.78	1932.79	7823.78	2267.04	2526.79	661.657	663.595	1829.42	917.38	3662.87	986.832	348.503	1749.34	1230.42	798.1	5044.9	1157.56	564.925	464.023	2831.35	624.989	2447.74	1900.75	1210.29	947.583	100.525
ENSG00000270174	ENSG00000270174	novel transcript, antisense to FARS2	chr6	5664985	5695272	-1	p25.1	42.37	lncRNA	806	3	-	47	4	0	1.05861	0	0.878725	0	0	0.683683	0	0	0	0	0	0	0	0	0	0	0	0.944527	0	0	0	0	1.08144	0	0	0	0	0.863217	0	0	0	0	0	0
ENSG00000235590	GNAS-AS1	GNAS antisense RNA 1 [Source:HGNC Symbol;Acc:HGNC:24872]	chr20	58818919	58850903	-1	q13.32	49.03	lncRNA	3657	3	-	51	4	0	7.41027	5.23562	36.0277	1.91568	31.5079	42.3884	0.85675	80.1018	26.8641	0	70.3234	1.19569	9.20508	33.1701	28.4517	0	136.245	154.902	11.0205	0	32.1434	176.353	12.9772	2.37686	65.981	0.810509	57.314	2.58965	20.905	40.8652	3.89499	128.392	0	33.2819
ENSG00000235455	IQCF5-AS1	IQCF5 antisense RNA 1 [Source:HGNC Symbol;Acc:HGNC:41297]	chr3	51873596	51875767	1	p21.2	50.92	lncRNA	2000	3	-	58	4	0	0	0	0	0	0	0	0	0	0	0	0	0	0	0	0	0	0	0	0	0	0	0	0	0	0	0	0	0	0	0	0	0	0	0
ENSG00000214401	KANSL1-AS1	KANSL1 antisense RNA 1 [Source:HGNC Symbol;Acc:HGNC:43740]	chr17	46193576	46196723	1	q21.31	45.58	lncRNA	976	3	-	47	4	14.5772	11.6447	24.6822	96.6598	3.83136	43.8859	35.5515	28.2728	39.5439	15.0439	16.2692	547.092	10.7613	69.0381	55.8655	5.85771	9.95604	23.946	22.6686	15.0279	20.8435	133.519	14.1894	45.4203	47.5373	120.965	9.72611	11.0219	7.76896	140.568	29.1895	31.1599	32.2501	20.8719	52.9794
ENSG00000184856	LINC00308	long intergenic non-protein coding RNA 308 [Source:HGNC Symbol;Acc:HGNC:16023]	chr21	22098616	22116605	1	q21.1	34.44	lncRNA	825	3	-	54	4	0	0	0	0	0	0	0	0	0	0	0	0	0	0	0	0	0	0	0	0	0	0	0	0	0	0	4.05255	0	0	0	0	0	0	0	0
ENSG00000226903	LINC00354	long intergenic non-protein coding RNA 354	chr13	111865136	111901264	1	q34		lncRNA		3	-	56	4	0	0	0	0	0	0	0	0	0	0	0	0	0	0	0	0	0	0	0	0	0	0	0	0	0	0	0	0	0	0	0	0	0	0	0
ENSG00000245526	LINC00461	long intergenic non-protein coding RNA 461	chr5	88507546	88691057	-1	q14.3		lncRNA		3	-	45	4	19.7221	3.17583	1998.51	5.27235	3.83136	4.50112	1139.7	1.7135	12.1674	21.4913	61.0097	120.384	25.1096	6.13672	0	0	0	14.863	4.72263	0	0	102.612	241.219	56.2347	76.0597	17.3634	8.10509	7.71535	25.8965	2.16259	55.877	0	0	6.26156	3.39611
ENSG00000233559	LINC00513	long intergenic non-protein coding RNA 513 [Source:HGNC Symbol;Acc:HGNC:43566]	chr7	130853720	130930682	1	q32.3	43.42	lncRNA	2384	3	-	58	4	0	3.17583	115.184	57.1171	0	7.87696	0.683683	85.675	1.01395	12.8948	55.3154	23.8384	7.17417	122.734	1.7458	7.53134	28.0014	23.946	22.6686	38.0707	12.5061	21.0169	44.5951	1.08144	19.0149	24.8876	4.86306	7.71535	24.1701	4.32518	11.6758	35.0549	20.0802	16.6975	34.6404
ENSG00000233746	LINC00656	long intergenic non-protein coding RNA 656 [Source:HGNC Symbol;Acc:HGNC:27304]	chr20	23125068	23132635	-1	p11.21	52.93	lncRNA	1910	3	-	55	4	0	0	0	0	0	0	0	0	0	0	0	0	0	0	0	0	0	1.65145	8.50074	0	0	0	0	0	0	0	0	0	0	0	0	0.649165	0	0	0
ENSG00000236499	LINC00896	long intergenic non-protein coding RNA 896 [Source:HGNC Symbol;Acc:HGNC:26519]	chr22	20206397	20208524	1	q11.21	61.09	lncRNA	2128	3	-	46	4	7.71734	10.5861	8.22741	2.63618	38.3136	2.25056	7.52052	1.7135	5.06973	40.8334	4.06731	13.1111	16.7397	0	10.4748	25.9413	8.71154	11.5601	12.2789	36.067	6.66992	1.23629	13.1758	15.1401	13.0727	26.0451	9.72611	19.8395	6.90574	1.44173	11.6758	61.0215	0.608492	18.7847	8.8299
ENSG00000234384	LINC01049	long intergenic non-protein coding RNA 1049 [Source:HGNC Symbol;Acc:HGNC:49043]	chr13	90493287	90535080	1	q31.3	35.34	lncRNA	742	3	-	54	4	0	0	0	0	0	0	0	0	0	0	0	0	0	0	0	0	5.60027	0	0	0	0	0	0	0	0	0	0	0	0.863217	0	0	0	0	1.04359	0
ENSG00000254300	LINC01111	long intergenic non-protein coding RNA 1111	chr8	76406654	76524356	1	q21.13		lncRNA		3	-	50	4	0.857483	14.8205	0	5.27235	1.91568	13.5034	77.9399	472.07	21.2929	126.799	0	16.6869	0	133.474	0	4.18408	0	1842.19	444.872	2.00372	0	9.89028	2.02705	11.8958	272.151	466.497	185.607	1.10219	110.492	0	8.33985	44.7924	14.6038	418.481	861.934
ENSG00000281912	LINC01144	long intergenic non-protein coding RNA 1144 [Source:HGNC Symbol;Acc:HGNC:49460]	chr1	45303910	45305619	1	p34.1	56.9	lncRNA	1710	3	-	51	4	59.1663	23.2894	54.6001	18.4532	22.9882	34.8837	55.3783	31.6998	39.5439	11.8202	27.6577	34.5657	41.8493	41.4228	55.8655	15.8995	33.6016	62.7551	16.057	71.1321	57.5281	18.5443	84.1226	22.7101	11.8843	42.8297	55.9252	74.9491	5.1793	62.7151	34.1934	15.58	26.7737	16.6975	23.7728
ENSG00000237013	LINC01812	long intergenic non-protein coding RNA 1812 [Source:HGNC Symbol;Acc:HGNC:52616]	chr2	67796054	67825562	-1	p14	38.51	lncRNA	725	3	[107]	56	4	0	0	0	0	1.91568	11.2528	41.7047	0	8.11157	1.07456	0	0	0	0	0	3.34726	0	2.47717	0	1.00186	0	1.23629	22.2976	1.08144	3.5653	0	0	23.146	0	0	0	0	0	0	0
ENSG00000259837	LINC01904	long intergenic non-protein coding RNA 1904 [Source:HGNC Symbol;Acc:HGNC:52723]	chr18	926083	927993	-1	p11.32	42.39	lncRNA	861	3	-	58	4	0	0	0	0	0	0	0	0	0	0	0	0	0	0	0	0	0	0	0	0	0	0	0	0	0	0	0	0	0	0	0	0	0	0	0
ENSG00000248391	LINC02064	long intergenic non-protein coding RNA 2064 [Source:HGNC Symbol;Acc:HGNC:52909]	chr5	29304305	29396095	-1	p13.3	33.72	lncRNA	4265	3	-	57	4	0	0	0	0	0	0	0	0	0	0	0	0	0	0	0	0	0	0	0	1.00186	0	0	0	0	0	0	0	0	0	0	0	0	0	0	0
ENSG00000261319	LINC02152	long intergenic non-protein coding RNA 2152 [Source:HGNC Symbol;Acc:HGNC:53014]	chr16	8298492	8299772	1	p13.2	44.34	lncRNA	1281	3	-	52	4	0	0	0	0	0	0	0	0	0	0	0	0	0	0	0	0	1.86676	0	25.5022	0	0	0	0	0	0	0	0	0	0	0	0	0	0	0	0
ENSG00000260192	LINC02240	long intergenic non-protein coding RNA 2240 [Source:HGNC Symbol;Acc:HGNC:53118]	chr5	124808981	125602227	1	q23.2	38.05	lncRNA	7574	3	-	46	4	1.71497	4.23444	4.48768	0.878725	1.91568	21.3803	1.36737	2.57025	8.11157	4.29825	1.62692	0	1.19569	6.13672	0	2.51045	2.48901	4.95435	1.88905	1.00186	0	0	2.02705	1.08144	0	1.73634	0.810509	7.71535	0	2.16259	0.833985	0.649165	3.04246	0	2.03767
ENSG00000249145	LINC02517	long intergenic non-protein coding RNA 2517 [Source:HGNC Symbol;Acc:HGNC:53506]	chr4	8320105	8327165	1	p16.1	49.43	lncRNA	1970	3	-	50	4	0	1.05861	0	0.878725	0	0	0.683683	0	0	0	0	1.19192	2.39139	0	0	0	0	0	0	0	0	0	1.01353	0	0	0	0	0	0	0	0	0	0	0	0
ENSG00000273409	LINC02712	long intergenic non-protein coding RNA 2712 [Source:HGNC Symbol;Acc:HGNC:54229]	chr11	127271029	127337033	1	q24.2	37.02	lncRNA	742	3	-	58	4	0	0	0	0	0	0	0	0	0	0	0	0	0	0	0	0	0	0	0	0	0	0	0	0	0	0	0	0	0	0	0	0	0	0	0
ENSG00000264464	LINC02837	long intergenic non-protein coding RNA 2837 [Source:HGNC Symbol;Acc:HGNC:54371]	chr18	49499390	49501860	1	q21.1	47.07	lncRNA	2190	3	-	57	4	0	0	0	0	0	0	0	0	0	0	0	0	0	0	0	0	0	0	0	0	0	0	0	0	0	0	0	0	0	1.44173	0	0	0	0	0
ENSG00000253741	LNCOC1	lncRNA associated with ovarian cancer 1	chr8	142701857	142727047	-1	q24.3		lncRNA		3	[170]	49	4	72.886	27.5239	1.49589	220.56	22.9882	115.904	71.1031	29.1295	11.1534	27.9386	130.968	44.1011	32.2837	6.13672	132.68	8.36815	166.142	11.5601	10.3898	393.731	18.3423	16.0717	64.8656	68.1304	72.4944	167.268	3.24204	23.146	143.294	13.6964	227.678	24.6683	7.30191	1.04359	74.0353
ENSG00000253733	LZTS1-AS1	LZTS1 antisense RNA 1 [Source:HGNC Symbol;Acc:HGNC:43630]	chr8	20275773	20290458	1	p21.3	47	lncRNA	892	3	-	53	4	0	0	0	0	0	0	0	0	0	2.14913	0	0	0	0	0	0	0	0	0	0	0	0	0	0	0	0	0	0	0.863217	0	0	0	0	0	0
ENSG00000224184	MIR3681HG	MIR3681 host gene [Source:HGNC Symbol;Acc:HGNC:52001]	chr2	11833926	12702913	1	p25.1	40.98	lncRNA	8444	3	-	51	4	0.857483	0	13.463	0	1.91568	43.8859	2.73473	0	5.06973	8.59651	0.813462	0	9.56556	0	0	3.34726	69.6923	1.65145	5.66716	0	7.50366	6.18142	3.04058	15.1401	0	1.15756	21.8837	5.51096	0.863217	28.8345	3.33594	101.27	24.9482	7.30516	4.07534
ENSG00000251230	MIR3945HG	MIR3945 host gene [Source:HGNC Symbol;Acc:HGNC:52002]	chr4	184844554	184855751	-1	q35.1	44.3	lncRNA	2149	3	-	45	4	0	1.05861	0	0	1.91568	0	0	0	1.01395	0	0	0	0	0	0	0	0	0	0	0	1.66748	1.23629	0	0	0	0	0.810509	1.10219	0	0	0	0	0	1.04359	0
ENSG00000247516	MIR4458HG	MIR4458 host gene	chr5	8450701	8486930	1	p15.31		lncRNA		3	-	52	4	1.71497	468.964	0	68.5405	760.525	722.43	6.15315	153.358	179.469	482.479	466.114	636.486	0	363.601	315.989	209.204	26.1346	148.63	491.154	356.662	0	461.134	1191.91	297.395	273.339	368.104	0	202.803	432.472	0	390.305	466.749	530.605	186.803	590.245
ENSG00000240889	NDUFB2-AS1	NDUFB2 antisense RNA 1 [Source:HGNC Symbol;Acc:HGNC:40396]	chr7	140695336	140697077	-1	q34	55.74	lncRNA	1648	3	-	47	4	34.2993	48.6961	35.1535	43.9363	82.3742	52.8882	40.3373	31.6998	51.7113	16.1184	69.1443	57.2123	44.2407	36.8203	54.1197	20.9204	29.2459	28.0746	34.9475	26.0484	59.1956	46.9788	90.2038	47.5832	64.1753	82.1868	41.336	159.818	50.0666	33.8806	60.8809	34.4057	76.0615	20.8719	57.734
ENSG00000286532	PARTICL	promoter of MAT2A antisense radiation-induced circulating long non-coding RNA [Source:HGNC Symbol;Acc:HGNC:50886]	chr2	85537462	85538666	-1	p11.2	52.37	lncRNA	1205	3	-	49	4	316.411	63.5166	86.7618	78.2065	51.7233	133.908	164.768	148.218	131.813	196.645	95.1751	83.4346	101.634	138.076	134.426	52.7194	123.206	181.659	177.571	200.372	198.43	110.029	156.083	254.137	97.4514	180.001	57.5462	126.752	72.5102	131.197	130.102	54.5298	288.425	77.226	78.1106
ENSG00000254887	POU2F2-AS1	POU2F2 antisense RNA 1	chr19	42132555	42137099	1	q13.2		lncRNA		3	-	57	4	0	13.7619	0	0	1.91568	0	0.683683	4.28375	0	0	11.3885	0	0	0	0	1.67363	0	0	0	0	0	1.23629	0	0	0	2.31512	0	0	0	0	0	16.8783	1.21698	0	7.47145
ENSG00000233038	PTPRN2-AS1	PTPRN2 antisense RNA 1 [Source:HGNC Symbol;Acc:HGNC:40488]	chr7	157854529	157863011	1	q36.3	58.05	lncRNA	1581	3	-	48	4	0	0	0	0	0	6.75168	0	0.85675	0	0	0	0	0	0	0	0	0	0	0	1.00186	1.66748	0	0	0	0	0	0	0	0	0	0	0	0	1.04359	0.679223
ENSG00000237976	RFX5-AS1	RFX5 antisense RNA 1 [Source:HGNC Symbol;Acc:HGNC:40503]	chr1	151346967	151348027	1	q21.3	51.56	lncRNA	618	3	[171]	45	4	37.7292	40.2272	164.548	22.8468	0	97.8994	15.7247	17.135	27.3766	11.8202	30.9116	45.2931	7.17417	27.6152	27.9327	13.389	23.0234	13.2116	47.2263	29.054	2.50122	21.0169	14.1894	16.2215	21.3918	87.9746	5.67356	26.4526	25.0333	106.688	20.8496	22.0716	44.4199	31.3078	50.9417
ENSG00000258573	RNASE11-AS1	RNASE11 and RNASE12 antisense RNA 1	chr14	20587644	20607221	1	q11.2	46.16	lncRNA	2769	3	-	48	4	0	0	0	0	0	0	0	0	2.02789	0	0	0	0	0	0	0	0	0	0	0	0	0	0	2.16287	0	0	0	1.10219	0	0	0	0	1.21698	0	0.679223
ENSG00000227028	SLC8A1-AS1	SLC8A1 antisense RNA 1 [Source:HGNC Symbol;Acc:HGNC:44102]	chr2	39786453	40255209	1	p22.1	38.74	lncRNA	8475	3	-	52	4	1.71497	17.9964	108.452	247.8	3.83136	15.7539	706.245	19.7053	30.4184	50.5045	0	11.9192	45.4364	119.666	5.23739	37.6567	2.48901	47.892	80.2848	25.0465	1.66748	133.519	141.894	37.8503	11.8843	5.20902	88.3455	49.5986	9.49539	0.720863	12.5098	9.73747	4.25945	57.3977	9.50912
ENSG00000243926	TIPARP-AS1	TIPARP antisense RNA 1 [Source:HGNC Symbol;Acc:HGNC:41028]	chr3	156671862	156674446	-1	q25.31	44.22	lncRNA	1322	3	-	55	4	22.2946	29.6411	32.1617	13.1809	57.4704	33.7584	86.8278	34.27	62.8647	8.59651	81.3462	171.637	23.9139	50.6279	83.7982	19.2467	8.08929	146.153	39.6701	10.0186	25.8459	29.6708	54.7304	38.9317	30.8992	472.863	62.4092	57.314	18.9908	25.2302	45.0352	45.4415	122.915	13.5667	28.5274
ENSG00000176912	TYMSOS	TYMS opposite strand [Source:HGNC Symbol;Acc:HGNC:29553]	chr18	630886	658340	-1	p11.32	41.85	lncRNA	2582	3	-	49	4	389.297	30.6997	227.376	261.86	377.389	28.132	44.4394	88.2453	80.1018	33.3115	84.6001	94.1619	138.701	46.0254	143.155	79.4975	78.4038	153.585	36.8365	40.0744	20.0098	153.299	23.3111	73.5376	47.5373	168.425	197.764	13.2263	36.2551	220.584	58.3789	129.184	162.467	79.3131	24.452
ENSG00000228889	UBAC2-AS1	UBAC2 antisense RNA 1 [Source:HGNC Symbol;Acc:HGNC:42502]	chr13	99181223	99200757	-1	q32.3	43.42	lncRNA	2628	3	-	57	4	96.0381	129.15	97.9809	43.9363	30.6509	192.423	69.052	43.6943	24.3347	118.202	52.0616	39.3334	8.36986	135.008	87.2898	86.192	101.427	146.153	241.799	199.37	74.2029	132.282	91.2173	125.447	19.0149	117.492	22.6943	39.6789	81.1424	198.237	202.658	109.06	163.684	31.3078	21.0559
ENSG00000246263	UBR5-DT	UBR5 divergent transcript	chr8	102239386	102253750	1	q22.3		lncRNA		3	-	44	4	446.749	176.788	65.0713	289.101	82.3742	114.779	98.4504	114.805	57.795	109.606	159.439	1041.74	95.6556	205.58	736.726	123.849	29.2459	194.871	48.1709	208.387	198.43	54.3965	65.8791	148.157	324.442	192.734	436.865	173.044	53.5195	342.41	226.844	1011.4	87.6229	36.5258	110.034
ENSG00000289161	ENSG00000289161	Novel transcript, antisense to GSDMD	chr8	143556816	143558325	-1			lncRNA		3	-	NA	NA
ENSG00000290993	ENSG00000290993	novel transcript	chr3	129382922	129399655	-1			lncRNA		3	-	NA	NA
ENSG00000291232	ENSG00000291232	Novel transcript	chr1	148402516	148432545	1			lncRNA		3	-	NA	NA
ENSG00000289313	LINC01512	Long intergenic non-protein coding RNA 1512	chr6	43891045	43938212	1			lncRNA		3	-	NA	NA
ENSG00000232964	LINC01737	long intergenic non-protein coding RNA 1737	chr1	230592660	230595583	-1	q42.2		lncRNA		3	-	NA	NA
[truncated: 23 more columns]

## Sheet: Downregulated
Gene_ID	Gene_name	Gene_description	Chromosome_scaffold_name	Gene_start_bp	Gene_end_bp	Strand	Karyotype_band	Gene_GC_content	Gene_type	Gene_Length	# studies	Previous references in EOC	OELE position / 58 norm	OELE quartile	NIHOVCAR3.norm	ONCODG1.norm	TOV112D.norm	OV56.norm	CAOV4.norm	OAW28.norm	JHOS2.norm	JHOM1.norm	COV318.norm	COV362.norm	OV90.norm	EFO21.norm	JHOC5.norm	JHOM2B.norm	OVSAHO.norm	TYKNU.norm	OVKATE.norm	SNU8.norm	X59M.norm	KURAMOCHI.norm	OVISE.norm	HEYA8.norm	FUOV1.norm	JHOS4.norm	COV644.norm	OVCAR4.norm	SNU119.norm	OVMANA.norm	OVTOKO.norm	OV7.norm	OVCAR8.norm	RMUGS.norm	OAW42.norm	CAOV3.norm	RMGI.norm
ENSG00000237125	HAND2-AS1	HAND2 antisense RNA 1 [Source:HGNC Symbol;Acc:HGNC:48872]	chr4	173527270	173659696	1	q34.1	39.48	lncRNA	21212	13	[42]	45	4	2.57245	17.9964	0	0	7.66272	1.12528	5.46947	0	3.04184	61.2501	1.62692	0	15.544	0	41.8991	244.35	2.48901	48.7178	8.50074	1.00186	0	0	30.4058	16.2215	10.6959	3.47268	6.48407	14.3285	20.7172	3.60432	18.3477	1.29833	1.21698	1.04359	0
ENSG00000285294	LINC00842	long intergenic non-protein coding RNA 842 [Source:HGNC Symbol;Acc:HGNC:44989]	chr10	46398362	46453306	1	q11.22	43.56	lncRNA	2872	7	-	45	4	0	300.645	0	7.90853	455.932	46.1365	2.73473	11.1378	5.06973	1.07456	1.62692	7.15153	60.9804	7.6709	1.7458	25.9413	6.84478	34.6804	434.482	1252.33	120.059	431.464	2.02705	1.08144	3.5653	25.4663	34.0414	1.10219	132.935	5.76691	555.434	11.0358	47.4624	437.266	6.79223
ENSG00000260563	ENSG00000260563	novel transcript	chr17	82293716	82294910	1	q25.3	47.36	lncRNA	1195	3	-	45	4	132.91	151.381	92.7453	16.6958	189.652	157.539	130.583	87.3885	466.416	84.8905	95.9886	252.688	75.3287	38.3545	141.41	208.367	44.8022	472.315	250.3	157.292	90.044	165.662	383.113	260.626	165.192	185.788	81.8614	199.497	56.9723	64.8777	120.928	148.659	270.171	64.7028	55.0171
ENSG00000267532	MIR497HG	mir-497-195 cluster host gene [Source:HGNC Symbol;Acc:HGNC:39523]	chr17	7015818	7019659	-1	p13.1	55.83	lncRNA	3842	3	-	45	4	53.1639	9.52749	3.73973	17.5745	0	21.3803	4.1021	12.8513	11.1534	17.193	141.542	33.3738	15.544	4.60254	12.2206	40.1671	57.8695	19.8174	30.2248	52.0967	5.00244	9.89028	34.4599	7.57005	15.4496	13.8907	16.2102	61.7228	11.2218	13.6964	20.0156	27.9141	12.7783	12.5231	14.9429
ENSG00000237886	NALT1	NOTCH1 associated lncRNA in T cell acute lymphoblastic leukemia 1 [Source:HGNC Symbol;Acc:HGNC:51192]	chr9	136546212	136549893	1	q34.3	64.77	lncRNA	1088	3	-	45	4	38.5867	7.41027	5.23562	0.878725	3.83136	4.50112	16.4084	22.2755	4.05579	3.22369	8.94809	4.76769	4.78278	18.4102	38.4075	8.36815	19.2898	4.12862	31.1694	17.0316	10.8386	3.70885	32.4328	16.2215	2.37686	6.94536	16.2102	25.3504	4.31609	5.04604	16.6797	73.3556	12.1699	11.4795	14.2637
ENSG00000258708	SLC25A21-AS1	SLC25A21 antisense RNA 1 [Source:HGNC Symbol;Acc:HGNC:44298]	chr14	37171888	37173811	1	q13.3	46.05	lncRNA	1924	6	[172]	46	4	125.192	211.722	255.05	81.7214	210.725	118.154	307.658	121.659	286.947	113.904	115.512	225.273	72.9374	164.157	309.006	201.673	111.383	232.029	157.736	0	470.229	149.59	146.961	230.346	92.6977	186.946	295.836	104.708	107.902	278.974	175.971	144.764	122.307	57.3977	268.972
ENSG00000247572	CKMT2-AS1	CKMT2 antisense RNA 1 [Source:HGNC Symbol;Acc:HGNC:48997]	chr5	81201341	81301565	-1	q14.1	42.03	lncRNA	8183	6	-	46	4	358.428	537.774	439.044	170.473	398.461	390.472	445.762	298.149	207.859	387.917	479.129	288.445	344.36	334.451	354.397	430.123	250.146	650.671	426.926	326.606	274.301	351.105	527.033	521.252	387.429	252.348	536.557	277.752	270.187	453.423	383.633	234.349	270.171	412.22	374.931
ENSG00000236333	TRHDE-AS1	TRHDE antisense RNA 1 [Source:HGNC Symbol;Acc:HGNC:27471]	chr12	72249964	72276954	-1	q21.1	38.18	lncRNA	18092	4	-	46	4	11.1473	201.136	0	3.5149	5.74704	1225.43	365.087	93.3858	26.3626	6.44738	0.813462	555.436	165.006	79.7773	1.7458	938.07	1.2445	1347.58	0.944527	2440.53	0	7.41771	3.04058	5494.77	134.293	2151.91	3533.01	29.7592	365.141	0	1.66797	1575.52	21.9057	1034.2	3131.9
ENSG00000243069	ARHGEF26-AS1	ARHGEF26 antisense RNA 1	chr3	154024401	154121347	-1	q25.2		lncRNA		4	-	46	4	2383.8	15.8792	0	2.63618	30.6509	1.12528	79.3073	0.85675	60.8368	6.44738	8.94809	22.6465	8.36986	0	359.634	5.02089	0	42.112	39.6701	7.01302	13.3399	2.47257	4.0541	54.0718	0	12.7332	12.9681	9.91973	6.04252	13.6964	45.0352	64.2673	41.3775	12.5231	6.79223
ENSG00000235159	ENSG00000235159	novel transcript	chr22	46067356	46069891	-1	q13.31	41.72	lncRNA	867	3	-	46	4	5.1449	3.17583	5.23562	3.5149	26.8195	10.1275	22.5616	6.854	3.04184	7.52194	3.25385	1.19192	3.58708	1.53418	0	1.67363	4.35577	6.6058	6.61169	3.00558	16.6748	2.47257	22.2976	0	2.37686	5.7878	3.24204	3.30658	1.72643	0	5.83789	0.649165	4.25945	5.21797	4.07534
ENSG00000266010	GATA6-AS1	GATA6 antisense RNA 1 (head to head) [Source:HGNC Symbol;Acc:HGNC:48840]	chr18	22164886	22169878	-1	q11.2	57.92	lncRNA	3173	10	[173]	47	4	4.28741	201.136	16.4548	7.90853	381.22	99.0247	0.683683	1.7135	92.2692	0	0.813462	1.19192	0	1.53418	1.7458	16.7363	0	11.5601	88.7855	8.01488	27.5134	34.616	36.4869	15.1401	11.8843	21.9936	4.05255	30.8614	1.72643	0.720863	4.16992	64.9165	18.2548	16.6975	18.339
ENSG00000263753	LINC00667	long intergenic non-protein coding RNA 667 [Source:HGNC Symbol;Acc:HGNC:27906]	chr18	5237826	5290608	1	p11.31	38.71	lncRNA	10094	7	[12]	47	4	68.5986	1152.83	5317.9	5.27235	6570.78	932.857	2000.46	1076.93	1707.49	2718.65	1001.37	1935.68	1611.8	1434.46	10.4748	1752.29	11.8228	760.492	2029.79	316.588	3142.37	1136.15	1008.46	771.064	206.787	1225.86	72.1353	950.09	2120.93	2012.65	313.578	95.4272	988.192	9.39235	283.236
ENSG00000245060	LINC00847	long intergenic non-protein coding RNA 847 [Source:HGNC Symbol;Acc:HGNC:45050]	chr5	180830326	180839742	1	q35.3	47.45	lncRNA	6088	3	-	47	4	108.9	463.671	19.4466	1.75745	620.68	29.2573	11.6226	6.854	1106.22	22.5658	510.854	344.466	218.812	16.876	85.544	357.32	195.387	61.1036	943.582	304.565	117.557	489.569	359.801	29.1988	456.358	869.328	8.9156	171.942	348.74	0.720863	391.973	27.9141	138.736	242.114	267.614
ENSG00000245812	LINC02202	long intergenic non-protein coding RNA 2202 [Source:HGNC Symbol;Acc:HGNC:53068]	chr5	159100483	159117478	1	q33.3	44.54	lncRNA	3214	3	-	47	4	0	9.52749	0	0	0	61.8904	9.57157	0	0	0	0	0	7.17417	0	0	1.67363	0	0	11.3343	0	0	0	1.01353	0	0	1.15756	0	67.2337	0	0.720863	1.66797	0	103.444	1.04359	0
ENSG00000205562	FLRT2-AS1	FLRT2 antisense RNA 1	chr14	85518871	85531585	-1	q31.3	39.79	lncRNA	4193	4	-	48	4	5.1449	74.1027	0	0	36.3979	24.7562	0.683683	0.85675	2.02789	0	0.813462	0	2.39139	1.53418	0	6.69452	6.84478	9.90869	672.503	2.00372	0	35.8523	1.01353	5.40718	0	11.5756	0	0	255.512	0	0.833985	0	0	6.26156	0
ENSG00000272159	ENSG00000272159	novel transcript, antisense to LETM2	chr8	38408048	38408742	-1	p11.23	42.59	lncRNA	695	3	-	48	4	4.28741	0	10.4712	3.5149	7.66272	4.50112	2.05105	13.708	20.2789	0	8.13462	0	4.78278	9.20508	8.72898	14.2259	3.73352	0.825725	15.1124	14.026	0	7.41771	3.04058	17.303	0	2.8939	19.4522	27.5548	33.6655	36.764	2.50195	19.4749	10.3444	37.5694	36.678
ENSG00000224238	WARS2-IT1	WARS2 intronic transcript 1 [Source:HGNC Symbol;Acc:HGNC:41393]	chr1	119047405	119064785	1	p12	39.76	lncRNA	2060	4	-	49	4	0	0	0	0	0	5.6264	1.36737	2.57025	4.05579	1.07456	0	0	0	0	0	0	0	1.65145	0	0	98.3814	1.23629	0	0	2.37686	0.57878	0	3.30658	1.72643	0	0	0	0	1.04359	2.03767
ENSG00000236810	ELOA-AS1	ELOA antisense RNA 1 [Source:HGNC Symbol;Acc:HGNC:50582]	chr1	23706901	23778296	-1	p36.11	46.3	lncRNA	3086	3	-	49	4	223.803	209.605	410.622	196.834	120.688	281.32	242.024	285.298	106.464	62.3247	235.091	79.8588	173.376	506.279	144.901	181.589	222.767	213.037	402.368	170.316	420.205	217.586	330.409	97.3292	314.935	428.876	213.164	138.876	119.124	286.904	394.475	493.365	349.883	219.155	175.239
ENSG00000249679	ENSG00000249679	novel transcript, antisense to CCDC110	chr4	185471461	185507055	1	q35.1	40.79	lncRNA	5580	3	-	49	4	0.857483	9.52749	23.1863	2.63618	0	14.6287	2.73473	9.42426	5.06973	1.07456	14.6423	10.7273	3.58708	13.8076	0	19.2467	0.622253	9.90869	26.4468	3.00558	0.83374	3.70885	4.0541	0	11.8843	1.15756	3.24204	4.40877	5.1793	6.48777	11.6758	21.4224	7.9104	29.2206	3.39611
ENSG00000281005	LINC00921	long intergenic non-protein coding RNA 921 [Source:HGNC Symbol;Acc:HGNC:26830]	chr16	3263743	3267567	1	p13.3	50.38	lncRNA	2468	3	[174]	49	4	16.2922	8.46888	17.9507	5.27235	13.4098	24.7562	38.2863	16.2783	19.265	27.9386	44.7404	9.53538	1.19569	19.9443	17.458	16.7363	8.08929	26.4232	37.7811	15.0279	10.0049	37.0885	47.6357	16.2215	9.50746	17.3634	85.1035	46.2921	35.3919	9.37122	33.3594	17.5275	17.6463	26.0898	36.678
ENSG00000256508	MRGPRF-AS1	MRGPRF antisense RNA 1 [Source:HGNC Symbol;Acc:HGNC:51140]	chr11	69012283	69018447	1	q13.3	58	lncRNA	2137	4	-	50	4	0	4.23444	0	0	0	0	0	0	0	0	0	1.19192	0	0	0	0	0	0	0	0	0	0	1.01353	0	1.18843	0	0	0	1.72643	0	0	0	0	0	0
ENSG00000235563	ENSG00000235563	novel transcript	chr1	53114576	53118609	1	p32.3	56.74	lncRNA	1871	3	-	50	4	0	1.05861	0	0	0	5.6264	0	0	0	0	0	0	0	0	0	4.18408	44.1799	0	0	0	0	0	0	0	0	0.57878	0	3.30658	0	0	0	0.649165	0.608492	3.13078	1.35845
ENSG00000257894	ENSG00000257894	novel transcript	chr12	79341205	79503396	-1	q21.2		lncRNA		3	-	50	4	6.00238	44.4616	2.99178	5.27235	72.7958	46.1365	45.8068	10.281	10.1395	35.4606	2.44039	7.15153	106.417	1692.2	13.9664	8.36815	1.2445	19.8174	132.234	21.0391	52.5256	13.5991	13.1758	10.8144	10.6959	273.763	143.46	27.5548	6.90574	2.88345	23.3516	38.9499	82.755	42.7874	387.157
ENSG00000272823	ENSG00000272823	novel transcript	chr1	220828676	220829211	-1	q41	44.96	lncRNA	536	3	-	50	4	0	1.05861	0	0	0	6.75168	0.683683	0	0	2.14913	0	3.57577	0	0	1.7458	0.836815	0	0	1.88905	0	0	0	1.01353	0	0	0	0	0	0	0	0	0	1.21698	0	0
ENSG00000237187	NR2F1-AS1	NR2F1 antisense RNA 1 [Source:HGNC Symbol;Acc:HGNC:48622]	chr5	93360779	93585649	-1	q15	38.28	lncRNA	22725	11	-	51	4	4741.02	196.901	0	2.63618	3.83136	336.459	490.201	10.281	124.716	4.29825	173.268	432.668	22.7182	7.6709	2686.78	516.315	7.46703	389.742	330.584	1.00186	202.599	1073.1	169.259	143.831	13.0727	12.7332	4.05255	124.548	8.63217	222.026	10.8418	6.49165	37.7265	1.04359	21.0559
ENSG00000257698	GIHCG	GIHCG inhibitor of miR-200b/200a/429 expression [Source:HGNC Symbol;Acc:HGNC:52649]	chr12	57930115	57936345	-1	q14.1	38.98	lncRNA	4058	10	[175]	51	4	135.482	424.503	551.984	631.803	159.001	882.22	209.207	622.001	141.952	256.821	224.516	773.558	46.6321	1129.16	157.122	473.637	125.073	218.817	419.37	481.895	942.127	634.214	638.521	286.58	628.681	203.152	329.067	241.38	682.805	423.868	576.283	114.902	755.747	661.639	890.461
ENSG00000253982	CLN8-AS1	CLN8 antisense RNA 1	chr8	1761054	1764508	-1	p23.3	60.43	lncRNA	2264	8	-	51	4	571.941	279.473	119.671	449.907	356.316	669.542	296.719	355.551	123.701	242.851	302.608	399.294	193.702	417.297	242.666	500.416	441.799	458.277	737.675	678.259	302.648	288.054	105.407	288.743	396.936	93.1836	333.93	38.5767	247.743	317.901	727.235	416.764	291.468	521.797	141.278
ENSG00000230393	ENSG00000230393	novel transcript	chr2	100104919	100107504	1	q11.2	51.74	lncRNA	2586	4	-	51	4	0	29.6411	0	0	0	19.1298	0.683683	23.989	0	4.29825	0	30.99	7.17417	0	0	0	0	6.6058	0	0	0	0	0	0	35.653	0	0	2.20438	3.45287	0	0	0	1.82548	4.17438	0
ENSG00000225342	LRRK2-DT	LRRK2 divergent transcript [Source:HGNC Symbol;Acc:HGNC:40848]	chr12	40186009	40224915	-1	q12	36.31	lncRNA	2280	3	-	51	4	0	7.41027	8.97535	1.75745	0	0	2.05105	15.4215	0	0	0	3.57577	3.58708	4.60254	1.7458	4.18408	5.60027	6.6058	17.0015	2.00372	3.33496	0	1.01353	3.24431	4.75373	0	0	0	0	0	14.1777	0	0.608492	4.17438	1.35845
ENSG00000248309	MEF2C-AS1	MEF2C antisense RNA 1 [Source:HGNC Symbol;Acc:HGNC:48908]	chr5	88883328	89466398	1	q14.3	35.98	lncRNA	7865	5	-	52	4	0.857483	7.41027	3.73973	0	0	2.25056	0.683683	0.85675	2.02789	1.07456	45.5539	7.15153	1.19569	0	45.3907	19.2467	1.2445	2.47717	9.44527	0	0	2.47257	6.08115	6.48861	1.18843	6.94536	2.43153	5.51096	4.31609	6.48777	2.50195	3.24582	4.25945	1.04359	0.679223
ENSG00000260269	ENSG00000260269	novel transcript	chr15	75527150	75601205	-1	q24.2	45.16	lncRNA	1095	3	-	52	4	24.867	19.055	17.2028	31.6341	42.145	19.1298	10.2553	35.1268	53.7392	26.8641	21.9635	27.4142	20.3268	46.0254	8.72898	42.6776	50.4025	11.5601	32.1139	16.0298	13.3399	25.962	26.3517	18.3844	11.8843	26.0451	6.48407	9.91973	13.8115	6.48777	25.0195	33.1074	34.0756	19.8283	14.2637
ENSG00000238057	ZEB2-AS1	ZEB2 antisense RNA 1 [Source:HGNC Symbol;Acc:HGNC:37149]	chr2	144517978	144521477	1	q22.3	43	lncRNA	3138	3	-	52	4	0.857483	2.11722	4.48768	0	0	1.12528	0	0	0	0	0.813462	0	0	0	0	1.67363	0	1.65145	0.944527	0	0	6.18142	0	0	0	0	0	1.10219	0.863217	25.2302	0	0	8.51889	0	0
ENSG00000234456	MAGI2-AS3	MAGI2 antisense RNA 3 [Source:HGNC Symbol;Acc:HGNC:40862]	chr7	79452877	79471208	1	q21.11	38.5	lncRNA	17783	15	[41]	53	4	2939.45	731.5	0	3.5149	5.74704	69.7674	144.941	2.57025	295.058	516.865	2.44039	644.83	572.738	7.6709	38.4075	3537.22	1.2445	768.75	36.8365	20.0372	41.687	1343.84	53.7168	72.4562	935.296	177.685	1.62102	15.4307	1192.97	1043.09	19.1816	13.6325	5509.9	18.7847	6.11301
ENSG00000250786	SNHG18	small nucleolar RNA host gene 18 [Source:HGNC Symbol;Acc:HGNC:49007]	chr5	9546200	9550609	1	p15.31	46.64	lncRNA	1951	6	-	53	4	48.019	558.946	0	1.75745	2793.06	9.00224	248.177	194.482	2.02789	616.799	0	675.82	399.362	0	6.98318	227.614	342.239	391.394	2288.59	1.00186	770.376	9.89028	2514.56	260.626	141.423	43.9873	2.43153	222.643	269.324	3.60432	820.641	5.19332	338.93	1.04359	0
ENSG00000259134	LINC00924	long intergenic non-protein coding RNA 924 [Source:HGNC Symbol;Acc:HGNC:27081]	chr15	95326528	95507865	1	q26.2	37.41	lncRNA	4113	6	-	53	4	0.857483	0	1.49589	0	0	0	0.683683	0	0	0	0	0	0	0	0	0	0	0	0	0	0	1.23629	0	0	1.18843	0	0.810509	0	0	0	0	0	0	0	0
ENSG00000255248	MIR100HG	mir-100-let-7a-2-mir-125b-1 cluster host gene [Source:HGNC Symbol;Acc:HGNC:39522]	chr11	122028325	122556721	-1	q24.1	39.21	lncRNA	28649	8	-	54	4	86.6058	2680.4	102.469	7.90853	19.1568	612.153	205.105	1.7135	928.775	49.4299	3759.82	1168.08	50.2192	3.06836	15.7122	1648.53	4.35577	894.26	950.194	1871.47	5.00244	744.244	24.3246	27.0359	5.94216	2037.31	8.9156	1572.83	20.7172	0.720863	17.5137	214.224	982.715	464.399	2241.44
ENSG00000260277	ENSG00000260277	novel transcript, antisense to C16orf52 and VWA3A	chr16	22083256	22092485	-1	p12.2	40.38	lncRNA	1411	3	-	54	4	0	0	0	0.878725	30.6509	1.12528	10.2553	2.57025	0	4.29825	4.06731	9.53538	3.58708	1.53418	1.7458	9.20497	4.97802	2.47717	7.55621	7.01302	0	2.47257	1.01353	5.40718	0	1.73634	11.3471	2.20438	6.04252	1.44173	2.50195	1.29833	3.65095	3.13078	2.03767
ENSG00000269893	SNHG8	small nucleolar RNA host gene 8	chr4	118278705	118285316	1	q26		lncRNA		9	[176]	55	4	6026.39	4749.98	3160.82	1614.22	2404.18	1462.87	1556.75	1862.58	1326.24	1814.94	3333.57	1966.67	1791.15	25508.8	1932.6	3000.82	2255.04	1620.9	963.417	524.975	1839.23	1181.89	5917.98	2956.64	2355.47	3825.16	1552.94	2881.13	2319.47	382.058	2049.93	5983.35	7282.44	1338.93	6583.71
ENSG00000248890	HHIP-AS1	HHIP antisense RNA 1 [Source:HGNC Symbol;Acc:HGNC:44182]	chr4	144642922	144661357	-1	q31.21	38.13	lncRNA	2153	9	[168]	55	4	7.71734	29.6411	0	0	1.91568	162.04	22.5616	30.843	8.11157	19.3421	2.44039	97.7376	20.3268	7.6709	3.49159	641.837	1.2445	90.8297	3.77811	6.01116	11.6724	82.8311	19.257	41.0946	73.6828	610.613	1.62102	35.2702	98.4068	11.5338	4.16992	1.94749	209.93	34.4386	11.5468
ENSG00000258537	FRMD6-AS2	FRMD6 antisense RNA 2 [Source:HGNC Symbol;Acc:HGNC:43637]	chr14	51454512	51599952	-1	q22.1	40.31	lncRNA	917	5	-	55	4	0.857483	0	0	0	0	2.25056	0	0.85675	0	0	0.813462	0	0	0	0	0	0	0	0.944527	0	0	0	0	0	0	0	0	0	0	0	0	0	0	0	0
ENSG00000235501	CNN3-DT	CNN3 divergent transcript	chr1	94927361	94963616	1	p21.3		lncRNA		3	-	55	4	0.857483	1138.01	516.083	299.645	49.8077	232.933	594.804	174.777	381.244	257.895	89.4809	141.839	316.859	15.3418	251.395	268.618	217.166	714.252	955.861	68.1265	262.628	679.957	90.2038	193.577	160.438	1239.75	163.723	367.03	248.607	437.564	296.899	210.329	821.465	134.624	403.459
ENSG00000234394	ENSG00000234394	novel transcript	chr9	68306528	68330626	1	q21.11	46.86	lncRNA	5282	3	-	55	4	0	0	0.747946	0	0	1.12528	0	0	0	0	0	0	0	0	0	0	0	0	0	0	0	0	0	1.08144	0	0	0	0	0.863217	0	1.66797	4.54415	0	2.08719	0.679223
ENSG00000214184	GCC2-AS1	GCC2 antisense RNA 1 [Source:HGNC Symbol;Acc:HGNC:28126]	chr2	108507515	108534196	-1	q12.3	41.4	lncRNA	799	3	-	55	4	6.00238	37.0514	0	7.90853	17.2411	10.1275	15.7247	29.1295	8.11157	7.52194	47.1808	3.57577	29.8924	16.876	12.2206	21.7572	6.22253	32.2033	39.6701	7.01302	6.66992	29.6708	21.284	9.73292	4.75373	62.5083	46.199	11.0219	6.04252	4.32518	6.67188	33.7566	18.2548	30.2642	21.7351
ENSG00000236914	LINC01852	long intergenic non-protein coding RNA 1852 [Source:HGNC Symbol;Acc:HGNC:52668]	chr15	38068812	38072990	-1	q14	44.53	lncRNA	2758	3	-	55	4	0	14.8205	50.1124	0	0	55.1387	19.1431	30.843	31.4323	9.67107	54.502	69.1315	52.6106	10.7393	17.458	27.6149	0.622253	8.25725	51.0044	5.0093	210.936	50.6877	0	30.2802	47.5373	9.26048	12.1576	8.81754	19.854	49.7396	30.0234	0.649165	28.5991	15.6539	54.3378
ENSG00000224958	PGM5-AS1	PGM5 antisense RNA 1 [Source:HGNC Symbol;Acc:HGNC:44181]	chr9	68353614	68357893	-1	q21.11	50.05	lncRNA	2355	12	-	56	4	9.43231	0	0	0	0	2.25056	0	0	0	0	0	0	1.19569	3.06836	0	4.18408	0	0	0	1.00186	1.66748	0	0	0	0	0	0	2.20438	0	0	0	0	0	0	0
ENSG00000264575	LINC00526	long intergenic non-protein coding RNA 526 [Source:HGNC Symbol;Acc:HGNC:28278]	chr18	5236724	5238598	-1	p11.31	54.56	lncRNA	1875	5	-	56	4	2.57245	146.088	543.757	0	354.401	52.8882	124.43	151.645	104.436	120.351	62.6366	148.99	89.6771	101.256	0	129.706	1.86676	91.6554	150.18	43.08	366.012	72.9408	81.082	20.5473	17.8265	239.615	17.8312	74.9491	227.889	296.275	56.7109	12.3341	93.7078	0	31.9235
ENSG00000259343	TMC3-AS1	TMC3 antisense RNA 1 [Source:HGNC Symbol;Acc:HGNC:51424]	chr15	81324338	81518200	1	q25.1	39.57	lncRNA	14159	3	-	56	4	11.1473	118.564	0	0.878725	0	114.779	36.2352	3.427	24.3347	45.1317	3.25385	32.1819	92.0685	0	6.98318	38.4935	22.4011	81.7467	123.733	60.1116	8.3374	119.92	40.541	95.1663	40.4067	45.1449	3.24204	9.91973	30.2126	28.8345	51.707	11.685	99.7927	21.9155	4.07534
ENSG00000247809	NR2F2-AS1	NR2F2 antisense RNA 1 [Source:HGNC Symbol;Acc:HGNC:44222]	chr15	96110040	96327361	-1	q26.2	40.51	lncRNA	10503	4	-	57	4	193.791	104.802	3.73973	38.6639	70.8801	11.2528	3.41842	38.5538	33.4602	6.44738	0	3.57577	0	59.833	83.7982	86.192	17.4231	189.091	222.908	93.173	1.66748	22.2531	11.1488	10.8144	36.8414	76.399	98.0716	20.9416	256.375	1.44173	21.6836	213.575	15.2123	24.0027	67.9223
ENSG00000248300	LINC02360	long intergenic non-protein coding RNA 2360 [Source:HGNC Symbol;Acc:HGNC:53282]	chr4	11740948	11769468	-1	p15.33	35.14	lncRNA	657	4	-	57	4	0	0	0	0	0	0	0	0	0	0	0	0	0	0	0	0	0	0	3.77811	0	0	0	0	0	0	0	0	0	0	0	0	0.649165	0	0	0
ENSG00000273129	PACERR	PTGS2 antisense NFKB1 complex-mediated expression regulator RNA [Source:HGNC Symbol;Acc:HGNC:50552]	chr1	186680622	186683165	1	q31.1	37.54	lncRNA	2544	3	-	57	4	2.57245	2.11722	0	0.878725	11.4941	1.12528	2.73473	9.42426	2.02789	1.07456	0	3.57577	2.39139	3.06836	0	23.4308	0.622253	10.7344	9.44527	0	0.83374	2.47257	1.01353	1.08144	4.75373	4.63024	0	14.3285	1.72643	0	20.8496	123.341	4.25945	0	0
ENSG00000237036	ZEB1-AS1	ZEB1 antisense RNA 1 [Source:HGNC Symbol;Acc:HGNC:42354]	chr10	31206278	31320447	-1	p11.22	38.57	lncRNA	3861	6	[177]	58	4	230.663	507.074	373.973	233.741	408.04	333.083	196.901	430.945	146.008	341.711	379.887	110.849	145.875	128.871	378.838	518.826	151.207	108.996	495.877	262.487	148.406	300.417	732.779	99.4921	375.545	281.866	303.941	667.928	105.312	678.332	284.389	397.289	342.581	427.874	370.856
ENSG00000243004	ENSG00000243004	novel transcript, sense overlapping to MACC1	chr7	19918981	20140453	-1	p21.1	36.82	lncRNA	3109	3	-	58	4	581.373	476.375	34.4055	385.76	266.279	61.8904	377.393	394.962	660.079	522.238	477.502	30.99	214.029	722.598	87.2898	349.789	480.379	273.315	203.073	90.1674	27.5134	548.911	668.927	186.007	33.2761	75.8202	171.018	328.453	399.67	149.94	119.26	100.621	135.085	237.939	166.41
ENSG00000266677	ENSG00000266677	novel transcript	chr17	18172625	18184753	-1	p11.2	54.16	lncRNA	2279	3	-	58	4	4.28741	3.17583	0	0	3.83136	2.25056	0.683683	0	0	0	3.25385	1.19192	2.39139	0	8.72898	3.34726	0	0.825725	6.61169	3.00558	0.83374	1.23629	1.01353	0	1.18843	0	1.62102	0	0	0.720863	0	0	0	0	4.07534
ENSG00000267774	ENSG00000267774	novel transcript, antisense to CCBE1	chr18	59696459	59698111	1	q21.32	62.25	lncRNA	1081	3	-	58	4	0	11.6447	0	0	0	1.12528	0	3.427	0	0	0	53.6365	8.36986	0	0	5.85771	0	3.3029	34.003	108.201	0	382.012	0	0	0	6.36658	9.72611	0	48.3402	0	0	0	0	90.7927	0.679223
ENSG00000227591	HSD11B1-AS1	HSD11B1 antisense RNA 1 [Source:HGNC Symbol;Acc:HGNC:54053]	chr1	209661364	209724125	-1	q32.2	41.63	lncRNA	477	3	-	58	4	0	13.7619	0	0	0	4.50112	5.46947	4.28375	2.02789	0	0.813462	0	2.39139	38.3545	0	7.53134	0	0	24.5577	0	3.33496	14.8354	0	0	0	2.8939	0.810509	0	0	0	0	8.43914	0.608492	6.26156	1.35845
ENSG00000277631	PGM5P3-AS1	PGM5P3 antisense RNA 1 [Source:HGNC Symbol;Acc:HGNC:51194]	chr9	72670	89850	1	p24.3	42.93	lncRNA	3116	3	-	58	4	0	0	1.49589	0	0	0	0.683683	0	0	0	0	0	0	1.53418	0	2.51045	0.622253	0	0	0	12.5061	2.47257	2.02705	0	0	1.15756	1.62102	0	2.58965	0.720863	0	0.649165	0	0	0
ENSG00000231943	PGM5P4-AS1	PGM5P4 antisense RNA 1 [Source:HGNC Symbol;Acc:HGNC:51195]	chr2	113526836	113542694	-1	q14.1	41.89	lncRNA	2423	3	-	58	4	0	0	0.747946	0	0	0	0	0	0	0	0.813462	0	0	0	0	0	0.622253	0	0	0	8.3374	0	0	2.16287	0	0.57878	0.810509	0	0	0	0	0	0	1.04359	0
ENSG00000236859	NIFK-AS1	NIFK antisense RNA 1 [Source:HGNC Symbol;Acc:HGNC:27385]	chr2	121649320	121728563	1	q14.3	44.13	lncRNA	5112	5	-	30	3	401.302	248.773	433.809	205.622	273.942	716.804	377.393	756.511	219.012	456.69	466.928	345.657	306.098	234.729	415.499	273.639	158.674	351.759	245.577	268.499	454.389	307.835	560.48	288.743	449.227	389.519	1349.5	500.395	345.287	569.482	314.412	187.609	536.69	529.102	379.006
ENSG00000231160	KLF3-AS1	KLF3 antisense RNA 1 [Source:HGNC Symbol;Acc:HGNC:25796]	chr4	38602438	38664914	-1	p14	43.68	lncRNA	6454	10	-	31	3	57.4513	10.5861	22.4384	3.5149	13.4098	68.6421	75.2052	13.708	32.4463	17.193	16.2692	13.1111	9.56556	19.9443	302.023	39.3303	8.08929	50.3692	9.44527	44.0819	165.914	11.1266	16.2164	63.8047	3.5653	32.9905	47.8201	87.0732	3.45287	68.482	6.67188	24.6683	17.6463	29.2206	25.1313
ENSG00000271614	ATP2B1-AS1	ATP2B1 antisense RNA 1 [Source:HGNC Symbol;Acc:HGNC:27883]	chr12	89708959	89712590	1	q21.33	48.4	lncRNA	3632	9	[178]	31	3	98.6105	17.9964	100.225	6.15107	107.278	190.172	164.768	18.8485	16.2232	18.2676	27.6577	47.6769	25.1096	18.4102	212.987	35.9831	14.9341	340.199	118.066	8.01488	35.0171	428.991	100.339	68.1304	17.8265	40.5146	21.8837	92.5841	6.04252	106.688	19.1816	7.78998	94.9248	27.1334	2.03767
ENSG00000227544	LINC03013	Long intergenic non-protein coding RNA 3013	chr7	35715032	35734924	1	p14.2	42.75	lncRNA	6724	7	-	31	3	11.1473	0	0	0	55.5547	7.87696	4.78578	0.85675	2.02789	0	1.62692	0	0	1.53418	3.49159	0.836815	0.622253	0.825725	0	3.00558	0.83374	0	2.02705	0	0	0	0	2.20438	0	0	2.50195	1.29833	25.5567	0	1.35845
ENSG00000261485	PAN3-AS1	PAN3 antisense RNA 1 [Source:HGNC Symbol;Acc:HGNC:39932]	chr13	28136843	28138193	-1	q12.2	43.15	lncRNA	1351	6	-	32	3	37.7292	33.8755	38.1452	2.63618	126.435	63.0157	61.5315	11.1378	66.9205	35.4606	63.4501	15.495	10.7613	12.2734	76.815	69.4557	6.84478	122.207	43.4482	81.1507	49.1907	27.1983	110.474	50.8275	115.278	105.917	34.0414	181.862	36.2551	72.8072	46.7031	48.0382	195.935	21.9155	65.8846
ENSG00000248115	ENSG00000248115	novel transcript	chr4	52945649	52958087	1	q12		lncRNA		4	-	32	3	1.71497	0	7.47946	7.0298	0	0	0.683683	3.427	5.06973	3.22369	5.69424	1.19192	2.39139	4.60254	5.23739	4.18408	1.86676	18.9917	1.88905	2.00372	0.83374	2.47257	2.02705	9.73292	2.37686	0.57878	0	1.10219	0	0	1.66797	0.649165	0.608492	2.08719	13.5845
ENSG00000254855	ENSG00000254855	novel transcript	chr11	66264777	66265666	-1	q13.2	60.67	lncRNA	479	3	-	32	3	6.85986	0	0	0	0	3.37584	2.05105	0.85675	0	2.14913	2.44039	1.19192	0	0	3.49159	1.67363	1.86676	0	0.944527	0	0	0	1.01353	2.16287	3.5653	0	0	12.1241	0.863217	0	0.833985	0	0	0	6.79223
ENSG00000250326	ENSG00000250326	novel transcript	chr4	142933195	143184861	-1	q31.21	37.65	lncRNA	1686	3	-	32	3	29.1544	17.9964	102.469	5.27235	3.83136	22.5056	36.2352	7.71075	14.1952	13.9693	13.0154	4.76769	10.7613	65.9697	31.4243	14.2259	4.35577	29.7261	5.66716	9.01674	100.049	1.23629	14.1894	12.9772	8.31902	21.9936	15.3997	16.5329	6.90574	80.0158	22.5176	25.3174	44.4199	4.17438	7.47145
ENSG00000256973	ENSG00000256973	novel transcript	chr12	22460519	22463914	-1	p12.1	42.08	lncRNA	738	3	-	32	3	12.0048	9.52749	2.99178	0	3.83136	2.25056	15.7247	1.7135	5.06973	30.0878	4.88077	1.19192	3.58708	0	40.1533	21.7572	5.60027	11.5601	30.2248	8.01488	0	2.47257	17.2299	15.1401	7.13059	1.15756	6.48407	12.1241	1.72643	6.48777	6.67188	10.3866	10.3444	6.26156	15.6221
ENSG00000281371	INE2	inactivation escape 2 [Source:HGNC Symbol;Acc:HGNC:6061]	chrX	15785716	15787589	-1	p22.2	44.13	lncRNA	1874	3	-	33	3	0	0	11.2192	10.5447	0	12.3781	0	0	2.02789	0	7.32116	36.9496	0	0	0	1.67363	8.08929	0	0	0	0	0	3.04058	11.8958	8.31902	0	8.9156	0	0	4.32518	0	341.461	7.30191	7.30516	0
ENSG00000245694	CRNDE	colorectal neoplasia differentially expressed [Source:HGNC Symbol;Acc:HGNC:37078]	chr16	54845189	54929189	-1	q12.2	39.73	lncRNA	14708	12	[179]	34	3	740.008	1386.78	1643.98	384.882	844.815	1756.56	1638.79	1039.24	34.4742	267.566	1085.16	1766.43	29.8924	668.902	2744.39	594.976	1065.92	3191.43	666.836	1471.73	1745.85	471.025	144.934	191.414	834.279	517.429	551.957	609.512	478.222	3267.67	1546.21	244.086	1428.13	1635.31	2765.12
ENSG00000241684	ADAMTS9-AS2	ADAMTS9 antisense RNA 2 [Source:HGNC Symbol;Acc:HGNC:42435]	chr3	64684909	65053439	1	p14.1	39.79	lncRNA	8246	13	[180]	36	3	1.71497	4.23444	0	2.63618	1.91568	1.12528	0	30.843	2.02789	192.347	0	0	2.39139	95.1191	0	59.4139	0	18.9917	105.787	20.0372	0	2.47257	7.09468	2.16287	77.2481	0.57878	71.3248	15.4307	2.58965	63.436	13.3438	1.29833	0.608492	62.6156	6.11301
ENSG00000225733	FGD5-AS1	FGD5 antisense RNA 1 [Source:HGNC Symbol;Acc:HGNC:40410]	chr3	14920347	14948424	-1	p25.1	45.41	lncRNA	5162	6	[181]	36	3	9760.73	5015.7	8026.96	6020.15	9534.34	14599.4	8634.24	9569.9	7715.12	11317.3	4714.83	10359	9674.36	5716.35	9687.42	9313.75	5327.73	16123.9	7981.25	5820.81	22493.5	16676.2	4001.4	7778.77	7773.53	6735.27	7077.37	5808.55	8909.27	8475.91	8529.16	4693.46	7862.94	3300.89	3394.76
ENSG00000260693	ENSG00000260693	novel transcript	chr15	30540093	30545969	1	q13.2		lncRNA		3	-	36	3	6.00238	11.6447	0	4.39363	0	18.0045	27.3473	5.99725	10.1395	7.52194	10.575	2.38384	9.56556	9.20508	6.98318	6.69452	13.0673	52.0207	136.956	23.0428	19.176	2.47257	1.01353	11.8958	2.37686	2.31512	14.5892	5.51096	3.45287	5.04604	13.3438	11.685	1.21698	18.7847	16.9806
ENSG00000278175	GLIDR	glioblastoma down-regulated RNA [Source:HGNC Symbol;Acc:HGNC:48823]	chr9	39748514	39810097	-1	p12	40.28	lncRNA	6628	9	-	37	3	367.86	120.682	347.047	205.622	80.4585	244.186	975.616	459.218	57.795	332.04	286.339	849.841	570.346	1195.13	2011.16	205.02	114.495	397.999	170.015	289.538	621.97	318.962	165.205	284.418	259.078	475.757	232.616	12.1241	255.512	315.017	825.645	179.169	152.123	253.593	320.593
ENSG00000228649	SNHG26	small nucleolar RNA host gene 26 [Source:HGNC Symbol;Acc:HGNC:53131]	chr7	22854126	22872945	1	p15.3	44.48	lncRNA	5962	4	-	37	3	339.563	302.763	0.747946	71.1767	134.098	437.734	227.667	203.907	131.813	271.865	4167.37	190.708	306.098	260.81	305.514	938.07	211.566	364.144	622.443	325.605	26.6797	267.038	207.773	176.274	198.468	250.612	237.479	383.563	505.845	449.098	763.096	575.809	587.804	99.1414	393.949
ENSG00000272831	ENSG00000272831	novel transcript, antisense to RABGEF1	chr7	66739829	66740385	-1	q11.21	49.55	lncRNA	557	3	-	37	3	61.7388	26.4653	124.159	81.7214	147.507	175.544	70.4194	57.4023	214.957	51.5791	47.9943	239.576	49.0235	187.17	43.6449	25.9413	54.7582	173.402	74.6176	83.1544	235.115	60.578	91.2173	93.0035	30.8992	85.0807	29.9888	80.46	22.4437	30.2763	122.596	68.1623	101.01	61.572	81.5068
ENSG00000267082	ENSG00000267082	novel transcript, antisense to DOCK6	chr19	11203628	11216168	1	p13.2	54.18	lncRNA	569	3	-	37	3	1.71497	7.41027	0	0.878725	0	2.25056	0.683683	0	6.08368	0	10.575	2.38384	1.19569	4.60254	5.23739	10.0418	4.35577	6.6058	7.55621	0	0	1.23629	10.1352	2.16287	0	1.15756	17.0207	3.30658	2.58965	1.44173	1.66797	0.649165	0.608492	8.34875	20.3767
ENSG00000234336	JAZF1-AS1	JAZF1 antisense RNA 1 [Source:HGNC Symbol;Acc:HGNC:41218]	chr7	28180322	28243917	1	p15.1	41.04	lncRNA	4244	3	-	37	3	0	5.29305	0	0	13.4098	7.87696	0	5.1405	0	0	4.06731	0	5.97847	0	0	5.85771	2.48901	1.65145	12.2789	0	0.83374	2.47257	3.04058	3.24431	4.75373	0.57878	0	2.20438	0.863217	0.720863	0.833985	0	32.8586	0	6.79223
ENSG00000269194	ENSG00000269194	novel transcript, antisense to FUZ	chr19	49808933	49809738	1	q13.33	68.24	lncRNA	520	3	-	38	3	6.85986	9.52749	2.24384	6.15107	0	5.6264	6.15315	0.85675	7.09763	1.07456	8.13462	8.34346	3.58708	7.6709	0	15.8995	14.9341	4.95435	7.55621	10.0186	0	0	25.3381	5.40718	1.18843	6.94536	8.9156	11.0219	0.863217	0	5.83789	5.84248	1.21698	8.34875	5.43378
ENSG00000235026	DPP10-AS1	DPP10 antisense RNA 1 [Source:HGNC Symbol;Acc:HGNC:40941]	chr2	115126622	115161384	-1	q14.1	37.33	lncRNA	9293	8	-	39	3	9.43231	0	3.73973	0	452.1	0	0	0	2.02789	2.14913	0	4.76769	0	0	0	0	0	2.47717	0	0	0	0	8.1082	2.16287	0	112.283	0	0	0	0	676.361	0	28.5991	0	2.71689
ENSG00000244879	GABPB1-AS1	GABPB1 antisense RNA 1 [Source:HGNC Symbol;Acc:HGNC:44157]	chr15	50354959	50372202	1	q21.2	42.62	lncRNA	17179	6	-	39	3	3662.31	367.338	1079.29	123.022	2475.06	801.2	1253.88	718.814	714.832	617.874	1095.73	1553.08	253.487	389.682	5668.6	2092.04	686.345	953.712	1191.05	4648.63	1025.5	877.762	1135.15	2444.05	1232.4	571.256	2326.97	3949.16	1052.26	2311.09	1010.79	1169.8	1460.99	2001.61	5371.98
ENSG00000236404	VLDLR-AS1	VLDLR antisense RNA 1 [Source:HGNC Symbol;Acc:HGNC:49621]	chr9	2421597	2622457	-1	p24.2	39.69	lncRNA	6211	5	[182]	39	3	0.857483	32.8169	11.9671	47.4511	88.1213	68.6421	146.308	100.24	114.576	49.4299	80.5328	9.53538	45.4364	642.821	26.1869	21.7572	0.622253	41.2862	30.2248	9.01674	190.093	3.70885	6.08115	360.118	0	139.486	114.282	133.365	6.90574	335.922	20.0156	365.48	155.166	11.4795	183.39
ENSG00000245552	LNCRNA-IUR	novel transcript, antisense to SESN3	chr11	95150539	95234391	1	q21		lncRNA		4	-	39	3	16.2922	10.5861	108.452	14.0596	132.182	127.157	41.7047	26.5593	68.9484	27.9386	4.88077	112.041	107.612	38.3545	26.1869	6.69452	7.46703	85.0496	357.031	5.0093	175.919	3.70885	70.9468	28.1173	43.972	52.669	31.6099	103.606	6.04252	51.1813	97.5762	2.59666	108.92	2.08719	16.3013
ENSG00000177410	ZFAS1	ZNFX1 antisense RNA 1 [Source:HGNC Symbol;Acc:HGNC:33101]	chr20	49278178	49299600	1	q13.13	45.68	lncRNA	8315	7	[183]	40	3	4205.1	17512.6	8954.41	5622.08	4153.19	10349.2	1479.49	7290.95	5337.42	7249.01	11325	18120.8	3089.67	23339.5	3048.16	3322.99	3842.41	5214.45	3687.43	3993.42	6175.51	3261.32	6780.48	1931.44	11584.8	33663	5066.49	7800.21	7393.46	4387.17	4737.87	13660.4	23022.3	1618.61	46255.1
ENSG00000260025	CRIM1-DT	CRIM1 divergent transcript [Source:HGNC Symbol;Acc:HGNC:54057]	chr2	36354749	36355114	-1	p22.2	43.72	lncRNA	366	4	-	40	3	0.857483	57.165	0	19.3319	122.603	72.0179	16.4084	43.6943	42.5858	35.4606	107.377	95.3538	57.3933	12.2734	0	44.3512	1.2445	94.9583	71.784	16.0298	7.50366	60.578	25.3381	48.6646	19.0149	50.9327	36.4729	37.4745	52.6562	17.3007	248.527	12.9833	96.1418	30.2642	200.371
ENSG00000253123	ENSG00000253123	novel transcript	chr8	37326575	37331991	-1	p11.23	50.06	lncRNA	4817	4	-	40	3	0	2.11722	0	0	0	3.37584	0	0	3.04184	0	0.813462	1.19192	0	1.53418	0	0	3689.34	0	0.944527	0	1.66748	0	2.02705	0	0	0	0	9.91973	3.45287	0	0	0	0	0	0
ENSG00000270096	ENSG00000270096	novel transcript, antisense to LRRC34	chr3	169794962	169796213	1	q26.2	29.63	lncRNA	1252	3	-	40	3	22.2946	0	0.747946	5.27235	0	22.5056	0	1.7135	0	21.4913	0.813462	5.95961	33.4794	10.7393	24.4411	11.7154	0	21.4688	0	5.0093	38.3521	0	7.09468	22.7101	24.9571	0	7.29458	23.146	5.1793	12.2547	0.833985	12.9833	18.2548	2.08719	43.4703
ENSG00000241990	PRR34-AS1	PRR34 antisense RNA 1 [Source:HGNC Symbol;Acc:HGNC:50499]	chr22	46053705	46057210	1	q13.31	55.48	lncRNA	1093	3	-	40	3	107.185	269.946	8.22741	388.397	178.158	200.3	331.586	292.152	75.0321	164.408	230.21	1569.76	271.423	386.613	141.41	89.5392	144.985	247.717	233.298	139.259	135.9	613.197	296.963	87.5963	102.205	308.49	12.1576	82.6644	216.667	1.44173	377.795	232.401	203.845	304.729	160.976
ENSG00000251450	RASGRF2-AS1	RASGRF2 antisense RNA 1	chr5	80947694	80960907	-1	q14.1		lncRNA		3	-	40	3	0	15.8792	0	0	0	7.87696	0.683683	0.85675	0	0	0	0	2.39139	3.06836	0	54.393	0	0.825725	8.50074	13.0242	0	0	1.01353	0	16.638	0.57878	1.62102	0	0	0	1.66797	1.29833	0	1.04359	23.0936
ENSG00000263400	TMEM220-AS1	TMEM220 antisense RNA 1 [Source:HGNC Symbol;Acc:HGNC:44357]	chr17	10729777	10815164	1	p13.1	47.05	lncRNA	2716	4	-	41	3	0	1.05861	2.99178	0.878725	0	0	0	0	2.02789	8.59651	15.4558	0	2.39139	0	20.9495	37.6567	45.4245	0	0	0	1.66748	7.41771	0	1.08144	8.31902	0	0	0	0.863217	33.8806	20.8496	0.649165	0	1.04359	0
ENSG00000231999	LRRC8C-DT	LRRC8C divergent transcript	chr1	89581291	89633003	-1	p22.2		lncRNA		3	-	41	3	22.2946	40.2272	62.8275	14.9383	45.9763	95.6488	26.6637	143.077	76.046	151.513	279.018	15.495	53.8062	10.7393	108.239	87.0288	26.1346	48.7178	161.514	130.242	32.5159	25.962	118.582	88.6777	117.655	26.6239	21.8837	163.124	54.3827	100.921	238.52	84.3914	157.6	56.3541	76.7522
ENSG00000178977	LINC00324	long intergenic non-protein coding RNA 324 [Source:HGNC Symbol;Acc:HGNC:26628]	chr17	8220642	8224043	-1	p13.1	54.64	lncRNA	2082	4	-	42	3	48.019	13.7619	165.296	7.90853	40.2293	28.132	7.52052	3.427	29.4045	8.59651	20.3366	19.0708	21.5225	3.06836	59.3571	21.7572	239.567	67.7094	42.5037	27.0502	83.374	4.94514	55.7439	18.3844	8.31903	87.3958	25.9363	48.4965	6.90574	13.6964	42.5332	35.0549	135.085	13.5667	10.8676
ENSG00000259275	ENSG00000259275	novel transcript	chr15	96354237	96405235	1	q26.2	45.21	lncRNA	7083	3	-	42	3	252.1	17.9964	6.73151	7.0298	7.66272	10.1275	4.78578	7.71075	13.1813	13.9693	2.44039	48.8688	1.19569	13.8076	125.697	128.033	0.622253	35.5062	38.7256	165.307	33.3496	2.47257	1.01353	0	7.13059	22.5724	23.5048	20.9416	20.7172	0	14.1777	127.236	14.6038	13.5667	83.5444
ENSG00000275120	ENSG00000275120	novel transcript, antisense to ZSCAN2	chr15	84597809	84633988	-1	q25.2	48.36	lncRNA	3668	3	-	42	3	9.43231	6.35166	16.4548	5.27235	0	5.6264	2.73473	0.85675	7.09763	5.37282	4.88077	15.495	5.97847	0	8.72898	9.20497	12.4451	3.3029	45.3373	23.0428	0	6.18142	3.04058	4.32574	3.5653	6.36658	2.43153	7.71535	4.31609	2.88345	0.833985	3.89499	3.65095	14.6103	17.6598
ENSG00000272870	SAP30-DT	SAP30 divergent transcript [Source:HGNC Symbol;Acc:HGNC:54424]	chr4	173349543	173370721	-1	q34.1	38.32	lncRNA	9066	3	-	42	3	58.3088	100.568	50.1124	7.0298	95.784	175.544	43.072	83.1048	43.5997	58.0264	202.552	42.9092	34.6751	23.0127	31.4243	152.3	103.294	52.0207	143.568	220.409	39.1858	103.848	122.637	23.7916	123.597	111.705	16.2102	146.592	109.629	137.685	105.082	53.2315	219.057	57.3977	14.2637
ENSG00000235531	MSC-AS1	MSC antisense RNA 1 [Source:HGNC Symbol;Acc:HGNC:48724]	chr8	71828167	72118393	1	q13.3	37.87	lncRNA	11501	3	[184]	42	3	0.857483	2690.99	1.49589	0.878725	9.5784	340.96	1.36737	1.7135	3.04184	21.4913	0	60.788	362.295	0	0	451.88	26.1346	627.551	569.55	2.00372	0	929.686	4.0541	166.541	76.0597	25.4663	0	1.10219	399.67	392.15	221.84	1.29833	0	758.693	0.679223
ENSG00000226688	ENTPD1-AS1	ENTPD1 antisense RNA 1 [Source:HGNC Symbol;Acc:HGNC:45203]	chr10	95732976	96090250	-1	q24.1	39.5	lncRNA	25009	3	-	43	3	23970.1	944.28	1470.46	2175.72	132.182	566.016	650.183	825.051	940.943	1310.97	1194.16	431.476	1066.56	765.556	1845.31	922.17	3167.89	541.675	482.653	1131.1	539.43	658.94	682.103	899.755	1366.7	516.272	976.664	467.329	1264.61	1560.67	1753.87	1091.25	870.753	745.126	780.427
ENSG00000248445	SEMA6A-AS1	SEMA6A antisense RNA 1 [Source:HGNC Symbol;Acc:HGNC:51110]	chr5	116447547	116508276	1	q23.1	39.5	lncRNA	2829	3	-	15	2	7.71734	10.5861	15.7069	0	97.6997	14.6287	20.5105	13.708	9.12552	21.4913	26.0308	15.495	3.58708	23.0127	57.6113	13.389	3.73352	28.0746	19.8351	9.01674	0	2.47257	75.0009	24.873	8.31902	6.36658	27.5573	26.4526	15.5379	65.5986	19.1816	42.8449	12.7783	64.7028	33.9612
ENSG00000261879	ZNF594-DT	ZNF594 divergent transcript [Source:HGNC Symbol;Acc:HGNC:55347]	chr17	5192027	5248182	1	p13.2	47.72	lncRNA	4419	3	-	15	2	75.4585	38.11	0	26.3618	122.603	77.6444	77.9399	34.27	43.5997	139.693	69.9578	41.7173	10.7613	53.6963	116.968	115.481	80.8929	65.2322	258.8	118.219	76.7041	21.0169	164.191	100.573	71.3059	76.9778	115.903	393.483	59.562	78.5741	58.3789	74.0048	62.6747	85.5747	121.581
ENSG00000232934	ENSG00000232934	novel transcript, antisense to ACSL5	chr10	112395813	112425589	-1	q25.2	42.18	lncRNA	3256	3	-	16	2	0.857483	0	4.48768	0	0	0	1.36737	2.57025	3.04184	1.07456	0	5.95961	0	0	3.49159	8.36815	1.86676	7.43152	4.72263	2.00372	2.50122	1.23629	7.09468	1.08144	1.18843	0	9.72611	2.20438	1.72643	1.44173	1.66797	5.84248	0	2.08719	2.03767
ENSG00000235652	EPM2A-DT	FBXO30 divergent transcript [Source:HGNC Symbol;Acc:HGNC:48990]	chr6	145799409	145887430	1	q24.3	36.96	lncRNA	8682	11	-	17	2	335.276	159.85	159.312	108.962	208.809	452.363	189.38	168.78	43.5997	303.027	71.5847	635.295	205.66	205.58	862.423	423.429	47.2912	274.966	387.256	255.474	454.389	139.7	263.517	165.46	560.94	256.978	393.097	385.767	114.808	152.823	225.176	266.807	220.883	196.196	669.714
ENSG00000272447	ENSG00000272447	novel transcript	chr10	79825902	79827602	1	q22.3		lncRNA		8	-	17	2	155.204	157.733	71.0549	98.4172	70.8801	102.4	136.737	210.761	150.064	193.421	100.056	153.758	80.1115	122.734	99.5104	86.192	128.806	224.597	222.908	76.1414	25.0122	80.3585	346.626	162.215	116.466	151.64	171.828	120.139	181.276	155.707	131.77	68.8115	55.9813	144.016	147.391
ENSG00000259969	ENSG00000259969	novel transcript, overlapping C14orf37	chr14	57993545	57994525	-1	q23.1	34.86	lncRNA	981	3	-	17	2	1.71497	0	5.23562	6.15107	0	207.052	12.3063	27.416	0	64.4738	0	15.495	0	1.53418	6.98318	13.389	0	28.9004	6.61169	10.0186	0	0	2.02705	10.8144	96.263	1.15756	23.5048	0	5.1793	3.60432	1.66797	98.673	9.12739	66.79	1.35845
ENSG00000254109	RBPMS-AS1	RBPMS antisense RNA 1 [Source:HGNC Symbol;Acc:HGNC:48721]	chr8	30382119	30385401	-1	p12	57.3	lncRNA	1522	3	-	17	2	0	6.35166	0	77.3278	9.5784	54.0135	2.05105	137.08	40.5579	12.8948	0	30.99	0	190.238	6.98318	25.1045	0	10.7344	68.9505	43.08	60.0293	21.0169	1.01353	24.873	116.466	6.94536	26.7468	2.20438	0.863217	7.20863	20.8496	74.6539	3.04246	64.7028	15.6221
ENSG00000267058	ENSG00000267058	novel transcript	chr19	43891804	43901805	-1	q13.31		lncRNA		11	-	18	2	140.627	68.8097	76.2905	0.878725	461.679	230.683	82.7257	24.8458	66.9205	94.5616	61.0097	28.6061	28.6967	49.0937	223.462	105.439	0	39.6348	161.514	92.1711	152.575	2.47257	0	149.238	111.713	117.492	0.810509	71.6425	248.607	116.78	0	0.649165	77.887	235.852	84.2237
ENSG00000263050	DPH1-AS1	novel transcript	chr17	2043475	2044968	-1	p13.3		lncRNA		4	-	18	2	1.71497	4.23444	1.49589	0.878725	0	1.12528	0.683683	3.427	0	1.07456	4.06731	0	3.58708	0	5.23739	1.67363	6.22253	0	5.66716	1.00186	1.66748	2.47257	2.02705	2.16287	0	0	2.43153	2.20438	3.45287	0	4.16992	0	0	1.04359	0
ENSG00000287151	C2orf27A	chromosome 2 open reading frame 27A [Source:HGNC Symbol;Acc:HGNC:25077]	chr2	131647990	131767404	1	q21.1	40.75	lncRNA	7090	8	-	19	2	296.689	856.416	39.6411	127.415	181.989	730.307	219.462	675.119	233.208	157.961	274.137	451.738	241.53	260.81	366.617	222.593	93.3379	1059.4	184.183	205.381	254.291	560.037	264.53	139.505	507.461	390.677	329.067	158.716	441.967	267.44	573.781	327.828	189.241	238.983	580.056
ENSG00000234494	SP2-AS1	SP2 antisense RNA 1 [Source:HGNC Symbol;Acc:HGNC:51341]	chr17	47897330	47941410	-1	q21.32	47.92	lncRNA	2531	8	[107]	19	2	95.1806	30.6997	38.8932	57.9958	80.4585	130.532	72.4704	82.2481	124.716	48.3554	100.056	58.4042	89.6771	151.884	106.494	70.2925	66.581	65.2322	204.962	174.324	29.1809	55.6328	59.798	80.0262	65.3638	133.119	107.798	91.4819	129.483	56.9482	64.2168	66.864	186.199	39.6566	323.31
ENSG00000243701	DUBR	DPPA2 upstream binding RNA [Source:HGNC Symbol;Acc:HGNC:48569]	chr3	107220744	107348464	1	q13.12	38.76	lncRNA	15322	6	[185]	20	2	395.3	572.708	60.5836	177.502	260.532	478.244	45.8068	319.568	157.162	390.067	383.141	454.122	857.313	16.876	331.701	732.213	77.7816	511.949	766.011	340.632	110.888	956.885	276.692	640.21	205.599	282.445	281.247	439.775	412.618	374.128	496.221	281.088	540.95	378.825	135.165
ENSG00000203875	SNHG5	small nucleolar RNA host gene 5	chr6	85650491	85678932	-1	q14.3		lncRNA		3	[186]	20	2	10444.1	18445.2	7563.98	1621.25	2360.12	11503.7	4658.62	4905.75	735.111	11895.4	1022.52	23977.9	8489.43	37211.5	6361.68	5659.38	6389.91	25193.7	8089.87	1361.53	4735.65	8791.22	2293.61	4539.87	5570.18	10526.9	6992.26	12713.8	24505.9	12877.5	11077	5162.81	2648.77	1337.89	18614.1
ENSG00000272841	MAP3K4-AS1	MAP3K4 antisense RNA 1 [Source:HGNC Symbol;Acc:HGNC:55048]	chr6	160990318	160992342	-1	q26	53.38	lncRNA	2025	3	-	21	2	110.615	67.7511	71.8028	36.9064	82.3742	487.246	30.0821	161.069	11.1534	61.2501	7.32116	169.253	60.9804	38.3545	97.7646	127.196	52.8915	87.5268	61.3942	77.1432	76.7041	164.426	10.1352	16.2215	218.672	38.7783	36.4729	40.7811	44.0241	137.685	2611.2	36.3532	46.2454	125.231	24.452
ENSG00000251141	MRPS30-DT	MRPS30 divergent transcript	chr5	44742420	44808777	-1	p12		lncRNA		3	-	21	2	28.2969	70.9269	8.22741	2.63618	231.797	108.027	8.2042	11.1378	139.925	11.8202	579.999	108.465	20.3268	6.13672	6.98318	29.2885	14.9341	26.4232	51.949	17.0316	32.5159	16.0717	204.732	56.2347	36.8414	298.651	17.0207	103.606	12.085	215.538	117.592	10.3866	193.501	38.613	101.204
ENSG00000255495	ENSG00000255495	novel transcript	chr8	12194467	12196280	1	p23.1	54.36	lncRNA	1361	4	-	22	2	45.4466	267.828	8.97535	169.594	9.5784	52.8882	93.6646	250.171	17.2371	84.8905	58.5693	25.0304	137.505	41.4228	150.138	68.6189	131.918	82.5725	465.652	119.221	53.3594	40.7974	62.8386	60.5604	20.2034	45.1449	217.216	48.4965	113.082	149.219	122.596	131.78	97.3588	127.319	50.2625
ENSG00000245534	RORA-AS1	RORA antisense RNA 1 [Source:HGNC Symbol;Acc:HGNC:51410]	chr15	60479152	60630637	1	q22.2	40.19	lncRNA	2143	3	-	22	2	19.7221	4.23444	5.23562	22.8468	11.4941	4.50112	17.0921	6.854	15.2092	16.1184	28.4712	9.53538	4.78278	26.0811	52.3739	4.18408	23.6456	16.5145	10.3898	11.0205	17.5085	0	21.284	16.2215	1.18843	50.3539	8.9156	16.5329	1.72643	16.5799	20.0156	17.5275	29.2076	11.4795	13.5845
ENSG00000268912	ENSG00000268912	novel transcript	chr19	58428632	58431148	-1	q13.43	45.69	lncRNA	2517	3	-	22	2	114.045	77.2786	27.674	59.7533	132.182	45.0112	51.9599	41.124	107.478	119.277	17.0827	11.9192	63.3718	13.8076	120.46	70.2925	42.3132	28.9004	90.6746	42.0781	30.8484	30.9071	26.3517	43.2574	16.638	46.8812	102.124	100.299	57.8356	86.5036	35.8613	43.494	104.052	57.3977	13.5845
ENSG00000196741	LINC01560	long intergenic non-protein coding RNA 1560 [Source:HGNC Symbol;Acc:HGNC:27333]	chrX	47483571	47484823	1	p11.3	39.98	lncRNA	1253	3	-	22	2	262.39	37.0514	112.192	50.9661	53.639	163.166	126.481	100.24	73.0042	58.0264	114.698	30.99	131.526	27.6152	284.565	82.8447	36.0907	61.9293	51.0044	131.244	336.831	91.4851	174.326	58.3975	58.2332	60.1931	71.3248	146.592	53.5195	110.292	103.414	64.2673	79.7125	113.752	45.5079
ENSG00000253552	HOXA-AS2	HOXA cluster antisense RNA 2 [Source:HGNC Symbol;Acc:HGNC:43745]	chr7	27107777	27134302	1	p15.2	49.71	lncRNA	5431	3	-	22	2	11.1473	348.283	13.463	644.106	680.066	248.687	356.883	433.516	311.282	693.093	83.7866	92.9699	115.982	343.656	15.7122	509.621	284.992	456.626	333.418	466.867	191.76	129.81	699.332	1120.37	417.14	43.9873	744.858	2.20438	21.5804	38.2058	672.192	27.9141	201.411	82.4439	359.309
ENSG00000270589	ENSG00000270589	novel transcript, antisense to BBIP1	chr10	110910596	110912244	1	q25.2	37.17	lncRNA	1649	4	-	23	2	12.8622	14.8205	3.73973	0.878725	34.4822	10.1275	19.1431	11.9945	23.3208	29.0132	10.575	8.34346	13.1526	1.53418	38.4075	33.4726	15.5563	38.8091	52.8935	39.0725	7.50366	1.23629	39.5275	42.176	2.37686	1.73634	26.7468	54.0074	12.085	9.37122	8.33985	16.2291	28.5991	27.1334	63.1677
ENSG00000240875	LINC00886	long intergenic non-protein coding RNA 886 [Source:HGNC Symbol;Acc:HGNC:48572]	chr3	156747343	156817062	-1	q25.31	39.71	lncRNA	3961	3	[187]	23	2	0	15.8792	2.24384	6.15107	172.411	262.19	188.697	10.281	56.781	3.22369	180.589	56.0204	40.6536	82.8457	0	97.9074	11.2005	523.509	0	46.0856	224.276	344.923	97.2984	89.7592	14.2612	298.651	4.86306	149.898	6.04252	77.1324	9.17383	68.1623	515.393	24.0027	92.3743
ENSG00000233178	ENSG00000233178	novel transcript, antisense to PGM5	chr9	68393881	68406500	-1	q21.11	39.82	lncRNA	4007	3	-	23	2	27.4395	23.2894	66.5672	10.5447	7.66272	20.2551	121.696	54.832	24.3347	20.4167	43.927	13.1111	9.56556	61.3672	38.4075	36.8199	16.8008	30.5518	17.0015	32.0595	79.2053	28.4346	62.8386	21.6287	20.2034	30.0966	54.3041	20.9416	36.2551	167.24	68.3867	40.2482	40.1605	64.7028	61.8093
ENSG00000246695	RASSF8-AS1	RASSF8 antisense RNA 1 [Source:HGNC Symbol;Acc:HGNC:48637]	chr12	25936683	25959765	-1	p12.1	43.33	lncRNA	11316	8	-	24	2	17.1497	246.656	320.869	101.053	1388.87	365.716	529.171	454.078	34.4742	286.909	284.712	239.576	159.027	38.3545	532.468	451.043	2.48901	586.264	415.592	622.155	242.618	573.636	264.53	372.014	641.753	97.2351	196.954	5822.88	212.351	582.457	229.346	44.1432	1076.42	637.636	1691.27
ENSG00000225891	DHDDS-AS1	DHDDS antisense RNA 1 [Source:HGNC Symbol;Acc:HGNC:40925]	chr1	26462756	26468014	-1	p36.11	46.49	lncRNA	1261	3	-	24	2	13.7197	3.17583	7.47946	0	0	11.2528	9.57157	4.28375	11.1534	4.29825	9.76155	0	8.36986	7.6709	20.9495	10.0418	5.60027	11.5601	2.83358	12.0223	4.1687	1.23629	2.02705	6.48861	3.5653	2.31512	6.48407	12.1241	2.58965	4.32518	2.50195	11.0358	10.3444	9.39235	4.75456
ENSG00000180769	WDFY3-AS2	WDFY3 antisense RNA 2 [Source:HGNC Symbol;Acc:HGNC:21603]	chr4	84965534	85011277	1	q21.23	38.3	lncRNA	9357	10	[188]	25	2	81.4609	97.3922	106.956	431.454	91.9526	171.043	99.1341	53.9753	102.409	87.0396	130.967	132.303	141.092	191.772	277.582	74.4766	75.9148	151.933	58.5607	87.1618	131.731	67.9957	41.5545	197.903	232.933	74.0839	219.648	126.752	27.623	169.403	467.865	284.983	237.312	129.406	169.127
ENSG00000267107	PCAT19	prostate cancer associated transcript 19 [Source:HGNC Symbol;Acc:HGNC:49593]	chr19	41449520	41501223	-1	q13.2	44.21	lncRNA	8181	4	-	25	2	0	1.05861	0	17.5745	0	79.8949	9.57157	0	5.06973	80.5923	0	14.3031	35.8708	24.5469	0	0	0	0.825725	4.72263	0	170.917	1.23629	4.0541	1.08144	112.901	36.4632	4.86306	7.71535	0	0	24.1855	2.59666	4.86794	3.13078	1.35845
ENSG00000261167	ENSG00000261167	novel transcript, overlapping to MRPL3	chr3	131455126	131458598	-1	q22.1	39.27	lncRNA	3473	3	-	25	2	192.934	64.5752	103.217	309.311	195.399	97.8994	103.92	61.686	92.2692	94.5616	25.2173	108.465	34.6751	61.3672	137.918	158.158	79.0261	88.3525	49.1154	67.1246	356.841	107.557	261.49	336.327	122.409	34.148	363.108	205.008	187.318	402.242	128.434	140.22	184.982	159.67	349.8
ENSG00000215068	ANXA2R-AS1	ANXA2R antisense RNA 1	chr5	43041575	43054603	1	p12	43.17	lncRNA	5465	4	-	26	2	185.216	293.235	71.0549	409.486	950.177	43.8859	592.753	138.794	324.463	245	334.333	63.1719	115.982	93.5849	331.701	151.464	87.7376	227.074	576.161	216.402	35.8508	185.443	552.371	72.4562	39.2183	56.1417	260.984	134.467	79.416	20.1842	171.801	127.236	73.0191	569.802	575.981
ENSG00000260583	ENSG00000260583	novel transcript, antisense to MRPL39	chr21	25582770	25583326	-1	q21.3	44.17	lncRNA	557	3	-	26	2	9.43231	0	0	0.878725	9.5784	2.25056	2.05105	0.85675	1.01395	1.07456	0.813462	3.57577	2.39139	0	8.72898	5.02089	2.48901	1.65145	2.83358	1.00186	2.50122	0	6.08115	5.40718	0	0	0	0	3.45287	5.76691	1.66797	8.43914	3.04246	2.08719	2.03767
ENSG00000283122	HYMAI	hydatidiform mole associated and imprinted [Source:HGNC Symbol;Acc:HGNC:5326]	chr6	144004916	144008262	-1	q24.2	40.45	lncRNA	3347	9	[44]	27	2	0	11.6447	0	9.66598	0	7.87696	10.9389	9.42426	0	7.52194	0	0	0	0	12.2206	0.836815	0.622253	0	23.6132	3.00558	0	0	0	3.24431	8.31902	6.36658	14.5892	0	28.4862	20.1842	10.8418	5.19332	4.86794	8.34875	6.11301
ENSG00000204666	ENSG00000204666	novel transcript, sense overlapping ZNF473	chr19	50050589	50066793	1	q13.33	45.78	lncRNA	1525	4	-	27	2	16.2922	0	0	7.90853	22.9882	18.0045	0.683683	5.1405	6.08368	0	2.44039	4.76769	0	1.53418	43.6449	0	4.97802	5.78007	0.944527	10.0186	5.00244	0	1.01353	3.24431	1.18843	0	2.43153	1.10219	1.72643	3.60432	0	9.08831	0	8.34875	2.71689
ENSG00000234684	SDCBP2-AS1	SDCBP2 antisense RNA 1 [Source:HGNC Symbol;Acc:HGNC:44314]	chr20	1325405	1378735	1	p13	43.98	lncRNA	5308	6	[189]	28	2	312.981	53.9891	178.759	167.837	199.231	180.045	371.924	544.037	291.003	325.593	290.406	72.7073	223.595	334.451	331.701	116.317	255.124	320.381	761.288	468.871	632.809	100.139	134.799	256.3	153.308	133.119	440.917	238.073	76.8263	145.614	176.805	352.496	130.217	104.359	140.599
ENSG00000262061	RPH3AL-AS1	RPH3AL antisense RNA 1 [Source:HGNC Symbol;Acc:HGNC:55345]	chr17	331205	333488	1	p13.3	56.26	lncRNA	2284	4	-	28	2	0	0	0	0	19.1568	11.2528	0	0.85675	3.04184	3.22369	1.62692	0	0	0	5.23739	2.51045	0.622253	0.825725	11.3343	0	0	0	5.06763	3.24431	0	0	0.810509	7.71535	2.58965	2.16259	1.66797	1.29833	0.608492	1.04359	2.03767
ENSG00000260645	ENSG00000260645	novel transcript	chr6	80466958	80469080	1	q14.1		lncRNA		3	-	28	2	17.1497	7.41027	0	2.63618	36.3979	1.12528	21.1942	11.9945	5.06973	26.8641	8.13462	8.34346	21.5225	16.876	41.8991	78.6606	3.73352	79.2696	85.0074	71.1321	10.0049	7.41771	47.6357	30.2802	65.3638	20.2573	53.4936	40.7811	31.939	28.1137	15.0117	19.4749	29.8161	20.8719	44.8287
ENSG00000257242	LINC01619	long intergenic non-protein coding RNA 1619 [Source:HGNC Symbol;Acc:HGNC:27409]	chr12	91984976	92142914	-1	q21.33	38.41	lncRNA	4833	3	-	28	2	4.28741	2.11722	44.1288	2.63618	1.91568	7.87696	27.3473	11.1378	1.01395	3.22369	4.88077	9.53538	1.19569	4.60254	0	5.02089	146.229	3.3029	10.3898	26.0484	105.885	1.23629	9.12173	0	13.0727	1.73634	0.810509	1.10219	6.04252	3.60432	4.16992	15.58	0	5.21797	2.03767
ENSG00000245648	KLRK1-AS1	KLRK1 antisense RNA 1	chr12	10363638	10398506	1	p13.2		lncRNA		4	-	29	2	1.71497	34.9341	0.747946	6.15107	122.603	190.172	4.1021	18.8485	45.6276	52.6536	4.88077	5.95961	92.0685	55.2305	0	51.0457	1.86676	98.2612	368.365	1.00186	55.8606	35.8523	0	6.48861	180.642	1.73634	242.342	1.10219	20.7172	1.44173	4.16992	47.389	6.08492	13.5667	2.03767
ENSG00000259884	NR4A1AS	NR4A1 antisense RNA [Source:HGNC Symbol;Acc:HGNC:54409]	chr12	52058459	52059503	-1	q13.13	54.93	lncRNA	915	4	-	29	2	20.5796	22.2308	65.8193	152.019	396.546	0	8.88788	15.4215	85.1715	17.193	0.813462	94.1619	64.5675	33.7519	36.6617	2.51045	23.6456	12.3859	9.44527	7.01302	7.50366	23.4894	10.1352	3.24431	24.9571	32.4117	17.8312	0	28.4862	27.3928	5.83789	25.3174	10.3444	1.04359	5.43378
ENSG00000225706	PTPRD-AS1	PTPRD antisense RNA 1 [Source:HGNC Symbol;Acc:HGNC:49753]	chr9	8858127	8864772	1	p24.1	42.3	lncRNA	5014	4	-	29	2	6.00238	1.05861	6.73151	0	0	61.8904	1.36737	41.9808	1.01395	6.44738	0.813462	0	22.7182	0	0	5.02089	0.622253	9.90869	18.8905	0	1.66748	1.23629	2.02705	10.8144	68.9291	6.94536	0	68.3359	48.3402	146.335	31.6914	14.9308	239.137	14.6103	0
ENSG00000271930	ENSG00000271930	novel transcript	chr8	98943595	98944098	1	q22.2	35.32	lncRNA	504	3	-	29	2	0	12.7033	0.747946	0	0	1.12528	32.8168	2.57025	20.2789	2.14913	0	135.879	3.58708	6.13672	0	6.69452	0.622253	27.2489	0	3.00558	3.33496	2.47257	5.06763	2.16287	2.37686	20.2573	0.810509	1.10219	30.2126	0	1.66797	0	12.7783	1.04359	0.679223
ENSG00000255471	PRSS23-AS1	novel transcript	chr11	86892214	86925037	-1	q14.2		lncRNA		3	-	29	2	1.71497	6.35166	0	2.63618	0	22.5056	30.0821	4.28375	120.66	18.2676	8.94809	2.38384	10.7613	0	6.98318	10.0418	0.622253	11.5601	34.003	24.0447	7.50366	3.70885	19.257	10.8144	1.18843	1.73634	5.67356	51.803	6.90574	9.37122	3.33594	20.1241	2.43397	17.7411	0.679223
ENSG00000226237	GAS1RR	GAS1 adjacent regulatory RNA [Source:HGNC Symbol;Acc:HGNC:52261]	chr9	86948666	87002033	1	q21.33	39.42	lncRNA	4964	12	[190]	1	1	1.71497	1.05861	0	3.5149	9.5784	22.5056	38.9699	0.85675	33.4602	3.22369	0	9.53538	10.7613	0	1.7458	8.36815	1.86676	36.3319	34.9475	0	1.66748	1.23629	20.2705	36.7688	0	12.1544	0	17.6351	12.085	0	4.16992	0	27.3822	1.04359	1.35845
ENSG00000241158	ADAMTS9-AS1	ADAMTS9 antisense RNA 1 [Source:HGNC Symbol;Acc:HGNC:40625]	chr3	64561322	64592757	1	p14.1	39.06	lncRNA	7003	11	[191]	1	1	2.57245	0	0	20.2107	24.9038	0	0	9.42426	4.05579	45.1317	0	1.19192	2.39139	1.53418	0	3.34726	0	29.7261	0	3.00558	0	0	13.1758	3.24431	36.8414	4.63024	10.5366	12.1241	0	36.764	13.3438	19.4749	0	7.30516	6.79223
ENSG00000236013	LINC02941	Long intergenic non-protein coding RNA 2941	chr6	139976352	140093721	1	q24.1	36.92	lncRNA	3541	7	-	1	1	0.857483	10.5861	0	0	0	29.2573	0	0	2.02789	4.29825	0	0	0	0	0	5.85771	6.22253	18.1659	7.55621	0	0	0	4.0541	2.16287	1.18843	2.31512	0.810509	7.71535	0	0	2.50195	0.649165	12.7783	1.04359	1.35845
ENSG00000235947	EGOT	eosinophil granule ontogeny transcript [Source:HGNC Symbol;Acc:HGNC:37129]	chr3	4749192	4751590	-1	p26.1	44.64	lncRNA	1464	6	-	1	1	41.1592	2.11722	0	6.15107	15.3254	16.8792	0.683683	219.328	183.524	137.544	0.813462	2.38384	3.58708	19.9443	0	1.67363	1.2445	38.8091	37.7811	1.00186	0.83374	0	5.06763	21.6287	22.5802	3.47268	83.4825	11.0219	0	0	8.33985	4.54415	1.82548	18.7847	18.339
ENSG00000261340	LINC01616	long intergenic non-protein coding RNA 1616 [Source:HGNC Symbol;Acc:HGNC:51900]	chr11	29980113	29982392	-1	p14.1	34.82	lncRNA	2280	6	-	1	1	0	0	0	0	0	0	0	0	0	1.07456	0	0	0	0	0	0	0	0	0.944527	0	0	0	1.01353	1.08144	0	0	0	0	0	0	0	0	3.04246	0	0
ENSG00000251637	LINC02754	long intergenic non-protein coding RNA 2754 [Source:HGNC Symbol;Acc:HGNC:54274]	chr11	67886477	67906350	1	q13.2	44.7	lncRNA	7975	5	-	1	1	0	7.41027	0	0	21.0725	3.37584	2.73473	0	2.02789	0	0	2.38384	9.56556	0	0	0	1.2445	24.7717	0	19.0354	3.33496	0	0	17.303	0	0	0	1.10219	0	0.720863	0	1.29833	0	3.13078	0
ENSG00000272568	CPVL-AS2	CPVL antisense RNA 2	chr7	28979967	29013367	1	p14.3	40.04	lncRNA	4928	5	-	1	1	0	0	0	0.878725	19.1568	2.25056	24.6126	0.85675	259.57	2.14913	0	1.19192	0	13.8076	0	0	0	23.1203	1.88905	13.0242	5.00244	0	1.01353	29.1988	0	23.73	17.0207	8.81754	0	3.60432	0	0	21.2972	2.08719	23.7728
ENSG00000204814	ENSG00000204814	novel transcript	chr9	61659733	61662690	1	q13		lncRNA		5	-	1	1	0	0	0	0	0	0	0	0	0	0	0	1.19192	0	0	0	0.836815	0	0	0	0	0	0	0	0	0	0	0	0	0	0	0	0.649165	0	0	0
ENSG00000266256	LINC00683	long intergenic non-protein coding RNA 683 [Source:HGNC Symbol;Acc:HGNC:44467]	chr18	76528652	76670111	1	q23	44.95	lncRNA	14961	5	-	1	1	0.857483	0	1.49589	6.15107	1.91568	27.0067	17.7758	0	83.1436	7.52194	0	64.3638	41.8493	6.13672	0	13.389	0	52.8464	46.2818	1.00186	4.1687	0	0	65.9676	0	41.0934	0.810509	3.30658	0	0	0.833985	0	0.608492	5.21797	6.79223
ENSG00000259905	PWRN1	Prader-Willi region non-protein coding RNA 1 [Source:HGNC Symbol;Acc:HGNC:33235]	chr15	24101827	24823365	1	q11.2	38.96	lncRNA	7460	5	-	1	1	0.857483	0	0	0	0	0	0.683683	0	0	6.44738	0	0	1.19569	0	0	0	0	0	0	0	0	0	0	0	0	0	0	0	0	0	0	5.19332	1.21698	2.08719	0
ENSG00000145075	ENSG00000145075	coiled-coil domain containing 39	chr3	180614008	180870933	-1	q26.33		lncRNA		4	-	1	1	0	0	0	0	0	0	0	0.856751	0	0	15.4558	0	0	0	62.8487	0	0	0	1.88905	0	0	0	12.1623	0	0	0	0	0	0	0	3.33594	0	0	0	8.8299
ENSG00000248441	LETR1	lymphatic endothelial transcriptional regulator lncRNA 1	chr15	95186634	95327129	-1	q26.2		lncRNA		4	-	1	1	0	1.05861	23.1863	0	0	12.3781	0	0	3.04184	1.07456	0.813462	1.19192	0	4.60254	0	0.836815	0	1.65145	0	0	0	3.70885	1.01353	3.24431	0	13.8907	0	27.5548	0	0	0	0	62.6747	0	2.71689
ENSG00000244953	ENSG00000244953	novel transcript	chr11	43943787	43947206	-1	p11.2	53.54	lncRNA	2045	4	-	1	1	4.28741	0	0	0	0	2.25056	0.683683	0	1.01395	1.07456	0	1.19192	0	0	1.7458	0	0	0	2.83358	0	0	0	0	0	0	0	0	0	0	0	0	0	0.608492	0	0
ENSG00000258181	ENSG00000258181	novel transcript	chr12	47248124	47257539	1	q13.11	40.89	lncRNA	510	4	-	1	1	0	0	0	0	0	0	0	0.85675	0	0	0	1.19192	0	0	0	0	0	0	0	0	0	0	0	0	0	0	0	0	0	0	0.833985	0	0	1.04359	1.35845
ENSG00000261305	ENSG00000261305	novel transcript, overlapping LRRC61	chr7	150337483	150343346	1	q36.1	59.67	lncRNA	1693	4	-	1	1	0.857483	60.3408	0	503.51	0	33.7584	109.389	65.113	17.2371	3.22369	9.76155	184.748	37.0665	33.7519	0	4.18408	0	48.7178	139.79	72.1339	31.6821	6.18142	19.257	1.08144	71.3059	12.1544	25.9363	92.5841	56.9723	1.44173	7.50586	74.0048	12.1699	18.7847	7.47145
ENSG00000261671	ENSG00000261671	novel transcript	chr10	22257786	22258548	1	p12.31	33.55	lncRNA	763	4	-	1	1	0	1.05861	0	0	0	2.25056	0.683683	0.85675	0	0	0	7.15153	0	0	0	0.836815	0	0	0	1.00186	2.50122	1.23629	0	0	0	1.73634	0	1.10219	0.863217	0	0.833985	1.29833	0	0	0.679223
ENSG00000226031	FGF13-AS1	FGF13 antisense RNA 1 [Source:HGNC Symbol;Acc:HGNC:44264]	chrX	138711452	138716617	1	q26.3	46.46	lncRNA	1145	4	-	1	1	0	0	19.4466	0	0	4.50112	0	0	0	11.8202	0	3.57577	4.78278	0	0	0	0	11.5601	7.55621	0	6.66992	0	1.01353	7.57005	0	4.05146	0	1.10219	0	32.4389	14.1777	0	0	0	0
ENSG00000244578	LINC01391	long intergenic non-protein coding RNA 1391	chr3	138935189	138944020	-1	q22.3		lncRNA		4	-	1	1	0.857483	16.9378	0	0.878725	0	7.87696	49.9089	0	3.04184	11.8202	21.15	1.19192	17.9354	3.06836	3.49159	12.5522	16.8008	11.5601	3.77811	4.00744	0	2.47257	3.04058	34.6059	1.18843	0	14.5892	3.30658	2.58965	3.60432	7.50586	0	1.21698	1.04359	13.5845
ENSG00000260686	ENSG00000260686	novel transcript, overlapping SNX2	chr5	122832356	122834533	1	q23.2	31.22	lncRNA	2178	3	-	1	1	0	0	0	0	0	0	0	0	0	0	0	0	0	0	0	0	0	0	0	0	0	0	0	0	0	0	0	0	0	0	0	0	0	0	0
ENSG00000258913	LINC02691	long intergenic non-protein coding RNA 2691	chr14	104223584	104288069	1	q32.33		lncRNA		3	-	1	1	0	0	0	0	0	0	0	0	0	0	0	0	0	0	0	0	0	0	0	0	0	0	0	0	0	0	0	0	0	0	0	0	0	0	0
ENSG00000254141	ENSG00000254141	novel transcript	chr8	105669991	105679031	1	q23.1	33.81	lncRNA	716	3	-	1	1	0	1.05861	0	0.878725	0	1.12528	0	1.7135	0	0	0	0	0	0	0	0	0	0.825725	8.50074	0	0	0	0	1.08144	1.18843	1.15756	0	3.30658	1.72643	0	0	0	1.82548	0	0
ENSG00000250490	LINC02145	long intergenic non-protein coding RNA 2145 [Source:HGNC Symbol;Acc:HGNC:53005]	chr5	6310441	6339884	-1	p15.31	46.89	lncRNA	2923	3	[192]	1	1	0	2.11722	0	0	9.5784	0	0.683683	0	0	0	0.813462	4.76769	0	1.53418	0	0	8.08929	0	0	0	5.00244	0	0	0	1.18843	1.73634	9.72611	3.30658	0	0	0	0	0	1.04359	0.679223
ENSG00000233766	CAVIN2-AS1	CAVIN2 and TMEFF2 antisense RNA 1 [Source:HGNC Symbol;Acc:HGNC:40517]	chr2	191846539	192044525	1	q32.3	37.59	lncRNA	5155	3	-	1	1	14.5772	0	3.73973	5.27235	0	1.12528	0	6.854	2.02789	87.0396	0	27.4142	0	0	0	0.836815	0	38.8091	0.944527	0	0	0	4.0541	10.8144	0	0.57878	1.62102	28.657	12.9483	0	0	0	1.82548	5.21797	5.43378
ENSG00000256139	ENSG00000256139	novel transcript	chr12	109111218	109125594	1	q24.11	45.62	lncRNA	910	3	-	1	1	10.2898	2.11722	0	0	0	5.6264	10.9389	0.85675	5.06973	9.67107	8.94809	0	5.97847	0	31.4243	2.51045	20.5343	3.3029	8.50074	0	10.8386	4.94514	15.2029	9.73292	1.18843	6.36658	0.810509	0	1.72643	4.32518	0	0	0.608492	2.08719	0
ENSG00000260807	CEROX1	cytoplasmic endogenous regulator of oxidative phosphorylation 1 [Source:HGNC Symbol;Acc:HGNC:53928]	chr16	975761	981596	-1	p13.3	64.43	lncRNA	3905	3	-	1	1	168.924	1.05861	0	20.2107	768.187	51.7629	2.73473	0	30.4184	134.32	0.813462	3.57577	96.8513	6.13672	244.411	0.836815	394.508	3.3029	0	158.294	247.621	1.23629	204.732	0	8.31902	4.05146	560.872	293.183	0.863217	4.32518	0.833985	0	0	125.231	276.444
ENSG00000226622	ENSG00000226622	novel transcript	chr2	62533681	62662829	-1	p15		lncRNA		3	-	1	1	2.57245	0	0	0	0	0	0	0	1.01395	1.07456	0	2.38384	0	0	0	0	0	0	17.0015	2.00372	3.33496	0	1.01353	0	0	0	0	0	0	0	0	3.89499	0	0	0
ENSG00000226862	ENSG00000226862	novel transcript	chr1	202604268	202605293	1	q32.1		lncRNA		3	-	1	1	0.857483	0	0	0	0	0	0	0	0	0	0.813462	0	0	0	0	0.836815	0	0.825725	1.88905	0	0	0	0	0	0	0	0	2.20438	0	1.44173	0	0	0	0	0
ENSG00000233760	ENSG00000233760	novel transcript	chr7	26551686	26558880	1	p15.2	43.1	lncRNA	3407	3	-	1	1	0	1.05861	2.99178	0	0	92.273	0	0	1.01395	0	11.3885	0	3.58708	0	0	0	0	4.95435	0	4.00744	12.5061	1.23629	3.04058	1.08144	0	0	2.43153	4.40877	0	0	0	0.649165	0	1.04359	0
ENSG00000233894	ENSG00000233894	novel transcript	chr1	74468195	74469543	1	p31.1	31.65	lncRNA	905	3	-	1	1	0	0	0	0	0	0	0	0	0	0	0	0	0	0	0	0	0	0	0	0	0.83374	0	0	0	0	0	0	0	0	0	0	0	0	0	0
ENSG00000234699	ENSG00000234699	novel transcript	chr10	103452846	103462695	1	q24.33	54.29	lncRNA	657	3	-	1	1	0.857483	2.11722	0	0.878725	0	10.1275	2.05105	0	1.01395	0	0	11.9192	5.97847	0	0	0	1.2445	13.2116	0	12.0223	0	2.47257	0	3.24431	1.18843	0	0	5.51096	3.45287	1.44173	0	0.649165	3.65095	0	0
ENSG00000249849	ENSG00000249849	novel transcript	chr5	177682294	177713969	1	q35.3	44.74	lncRNA	431	3	-	1	1	0	0	0	0	0	0	0	0	1.01395	0	0.813462	0	0	0	0	0	0	0	0	0	0	0	0	0	0	0	0	0	3.45287	0.720863	0	0	0	0	0
ENSG00000250286	ENSG00000250286	novel transcript, antisense to EPN3	chr17	50525520	50538761	-1	q21.33		lncRNA		3	-	1	1	8.57483	6.35166	0.747946	2.63618	7.66272	2.25056	6.83683	2.57025	1.01395	1.07456	10.575	0	2.39139	10.7393	26.1869	5.02089	8.08929	4.12862	8.50074	23.0428	8.3374	0	6.08115	2.16287	8.31902	1.73634	4.86306	6.61315	1.72643	0	2.50195	0	20.0802	2.08719	6.11301
ENSG00000259359	ENSG00000259359	novel transcript	chr15	96171575	96174339	1	q26.2	38.16	lncRNA	757	3	-	1	1	1.71497	0	0	6.15107	0	0	2.05105	4.28375	1.01395	5.37282	0	0	1.19569	1.53418	0	1.67363	0	10.7344	1.88905	0	0	0	2.02705	0	9.50746	0	19.4522	0	0	0	0	16.8783	0	0	8.8299
ENSG00000259367	ENSG00000259367	novel transcript, antisense to AKAP13	chr15	85619623	85670948	-1	q25.3	39.19	lncRNA	660	3	-	1	1	0	0	0	0	0	0	0	0.85675	0	0	0	0	0	0	0	0	0	0.825725	0.944527	0	0	0	0	0	0	0	0	0	0	0	0	0	0	0	0
ENSG00000260859	ENSG00000260859	novel transcript, sense intronic to CRISPLD2	chr16	84828263	84829242	1	q24.1	45	lncRNA	260	3	-	1	1	0	0	0	0	0	0	0	0	0	0	0	0	0	0	0	0	0	0	0	0	0	0	0	0	0	0	0	0	0	0	0	0	0	0	0
ENSG00000261269	ENSG00000261269	novel transcript, overlapping ZNF366	chr5	72439903	72442387	-1	q13.2	42.25	lncRNA	2485	3	-	1	1	0	2.11722	3.73973	0	0	0	0.683683	0.85675	0	0	0	0	0	0	0	0.836815	0	0	0.944527	0	0	0	0	0	0	0	0	0	0	0	0	0	0	0	0
ENSG00000261292	ENSG00000261292	novel transcript	chr3	97759523	97761532	1	q11.2	31.04	lncRNA	2010	3	-	1	1	13.7197	0	0	4.39363	0	0	0.683683	5.1405	0	0	0	0	0	0	62.8486	0	0	4.95435	0	0	0	0	1.01353	0	1.18843	0.57878	7.29458	3.30658	1.72643	0	11.6758	9.73747	5.47643	0	0.679223
ENSG00000267042	ENSG00000267042	novel transcript, antisense to CCR10	chr17	42679963	42682020	1	q21.2	58.21	lncRNA	542	3	-	1	1	0	0	0.747946	1.75745	0	0	2.05105	0	10.1395	0	0	0	0	0	0	0.836815	11.2005	0	0	1.00186	0	0	1.01353	0	0	2.8939	0	2.20438	0	0	0	0.649165	0	0	0
ENSG00000267636	ENSG00000267636	novel transcript	chr19	31421997	31427302	1	q12	43.71	lncRNA	446	3	-	1	1	0	0	0	0	0	0	0	0	0	0	0	0	0	0	0	0	0	0	0	0	0	0	0	0	0	0	0	0	0	0	0	0	0	0	0
ENSG00000268047	ENSG00000268047	novel transcript, antisense to PTOV1	chr19	49852887	49854967	-1	q13.33	56.13	lncRNA	484	3	-	1	1	0.857483	0	0.747946	0	0	0	2.73473	1.7135	3.04184	5.37282	1.62692	0	1.19569	0	0	0.836815	3.11126	0.825725	0.944527	2.00372	0	2.47257	3.04058	0	2.37686	0	2.43153	3.30658	0.863217	2.16259	6.67188	0.649165	0	2.08719	1.35845
ENSG00000269210	ENSG00000269210	novel transcript, antisense to ARHGEF33	chr2	38959287	38960342	-1	p22.1	60.32	lncRNA	1056	3	-	1	1	4.28741	67.7511	6.73151	0	1.91568	0	72.4704	0	9.12552	0	3.25385	0	27.501	3.06836	0	12.5522	0.622253	9.08297	0	0	0	0	2.02705	6.48861	0	9.26048	33.2309	3.30658	22.4437	0	10.0078	0.649165	57.8068	3.13078	0
ENSG00000270140	ENSG00000270140	novel transcript	chr14	73905267	73905636	1	q24.3	40.27	lncRNA	370	3	-	1	1	0	0	0	0	0	14.6287	0	0.85675	0	2.14913	0	0	0	0	1.7458	0	0.622253	0	5.66716	0	0	0	1.01353	0	0	0	2.43153	0	0	0	0	0	0	1.04359	0.679223
ENSG00000270640	ENSG00000270640	novel transcript, sense intronic to FOSL2	chr2	28396815	28397110	1	p23.2	39.86	lncRNA	296	3	-	1	1	1.71497	3.17583	0	0	0	1.12528	1.36737	5.1405	2.02789	3.22369	0	2.38384	0	3.06836	0	1.67363	0	1.65145	3.77811	1.00186	0	0	1.01353	1.08144	3.5653	2.8939	5.67356	0	4.31609	0	2.50195	7.78998	0.608492	2.08719	2.03767
ENSG00000271730	ENSG00000271730	novel transcript, antisense to SESN1	chr6	108998482	108999125	1	q21	33.54	lncRNA	644	3	-	1	1	16.2922	0	5.23562	2.63618	0	0	4.1021	4.28375	1.01395	5.37282	0	2.38384	2.39139	0	31.4243	12.5522	0	2.47717	7.55621	3.00558	0	0	8.1082	0	2.37686	0	14.5892	28.657	1.72643	0.720863	1.66797	3.24582	1.21698	3.13078	52.9794
ENSG00000272158	ENSG00000272158	novel transcript, antisense to CHURC1-FNTB	chr14	65003325	65003767	-1	q23.3	37.25	lncRNA	443	3	-	1	1	1.71497	3.17583	0.747946	0	0	0	0.683683	0.85675	2.02789	1.07456	1.62692	0	0	0	0	0.836815	0.622253	1.65145	1.88905	1.00186	1.66748	2.47257	0	4.32574	0	0	0.810509	1.10219	0.863217	1.44173	2.50195	3.24582	1.21698	2.08719	2.71689
ENSG00000273650	ENSG00000273650	novel transcript	chr17	42751289	42751717	-1	q21.2	35.9	lncRNA	429	3	-	1	1	0	0	0	0	0	9.00224	0	0	1.01395	1.07456	0.813462	0	0	0	0	0	0	0	0	0	0	0	0	2.16287	2.37686	1.15756	0	0	2.58965	0.720863	0	0.649165	3.04246	0	6.79223
ENSG00000274719	ENSG00000274719	novel transcript, sense intronic to ALDH1A2	chr15	57990217	57990636	-1	q21.3	33.81	lncRNA	420	3	-	1	1	0	5.29305	0	0	0	0	0	0	0	24.715	0	0	0	6.13672	0	0	0	0	0	0	0	0	0	0	0	0	4.86306	0	2.58965	0	0	0	1.82548	1.04359	3.39611
ENSG00000184608	FAM167A-AS1	FAM167A antisense RNA 1 [Source:HGNC Symbol;Acc:HGNC:15548]	chr8	11368402	11438658	1	p23.1	44.15	lncRNA	2227	3	-	1	1	0	0	0	0	1.91568	0	0	0	0	0	0	0	0	0	0	0.836815	0	1.65145	0.944527	0	0	1.23629	0	0	0	0	0	0	0	0	0	0	0	0	0
ENSG00000233334	FAM53B-AS1	FAM53B antisense RNA 1	chr10	124703625	124714217	1	q26.13		lncRNA		3	-	1	1	0	0	0	1.75745	0	1.12528	0	0	0	0	0	1.19192	0	0	1.7458	0	2.48901	0.825725	0.944527	0	0	0	0	0	2.37686	0	0	0	0.863217	0	0	1.29833	0	1.04359	0
ENSG00000227888	FAM66A	family with sequence similarity 66 member A [Source:HGNC Symbol;Acc:HGNC:30444]	chr8	12362019	12388296	1	p23.1	43.5	lncRNA	1222	3	-	1	1	0.857483	1.05861	0	11.4234	0	2.25056	12.99	8.56751	1.01395	1.07456	2.44039	9.53538	31.0881	0	1.7458	0.836815	39.8242	0	15.1124	36.067	0.83374	0	14.1894	58.3975	0	2.31512	7.29458	0	1.72643	1.44173	21.6836	1.94749	3.65095	8.34875	0
ENSG00000253893	FAM85B	family with sequence similarity 85 member B [Source:HGNC Symbol;Acc:HGNC:32160]	chr8	8167819	8226614	-1	p23.1	45.71	lncRNA	792	3	-	1	1	0	6.35166	0	1.75745	0	0	1.36737	5.1405	0	2.14913	2.44039	1.19192	1.19569	1.53418	0	0.836815	4.35577	0.825725	11.3343	5.0093	0	2.47257	2.02705	2.16287	1.18843	0	0.810509	0	8.63217	3.60432	3.33594	0.649165	1.21698	3.13078	0
ENSG00000229901	FOXO6-AS1	FOXO6 antisense RNA 1 [Source:HGNC Symbol;Acc:HGNC:41066]	chr1	41375004	41375669	-1	p34.2	47.6	lncRNA	394	3	-	1	1	0	2.11722	0.747946	0	0	2.25056	2.73473	0.85675	0	0	0	1.19192	2.39139	1.53418	0	3.34726	0	0.825725	0.944527	0	0	0	0	0	1.18843	0	0	1.10219	1.72643	0	2.50195	0	0	0	6.11301
ENSG00000237863	IRS4-AS1	novel transcript, antisense to IRS4	chrX	108736011	108739223	1	q22.3		lncRNA		3	-	1	1	0	1.05861	8.22741	0.878725	0	5.6264	1.36737	2.57025	0	13.9693	0	4.76769	0	3.06836	1.7458	0.836815	0	3.3029	0	0	0.83374	1.23629	1.01353	2.16287	9.50746	7.52414	0.810509	1.10219	4.31609	1.44173	2.50195	0	0	0	0.679223
ENSG00000281832	LINC00602	long intergenic non-protein coding RNA 602 [Source:HGNC Symbol;Acc:HGNC:43917]	chr6	165987551	165989615	1	q27	60.77	lncRNA	2065	3	-	1	1	0	0	0	38.6639	78.5429	0	0	0	0	0	0	0	8.36986	0	0	0.836815	0	0	75.5621	0	0	1.23629	1.01353	0	2.37686	0	0	0	0	0	10.0078	2.59666	0	0	0
ENSG00000237949	LINC00844	long intergenic non-protein coding RNA 844	chr10	58999482	59066396	1	q21.1		lncRNA		3	-	1	1	0	1.05861	0	0	0	6.75168	0	4.28375	6.08368	3.22369	0.813462	0	0	0	0	7.53134	0.622253	0	2.83358	0	28.3472	0	1.01353	2.16287	0	2.8939	23.5048	0	0	0	0	1.94749	3.04246	25.0463	2.03767
ENSG00000281852	LINC00891	long intergenic non-protein coding RNA 891 [Source:HGNC Symbol;Acc:HGNC:48577]	chrX	71697196	71706455	1	q13.1	43.43	lncRNA	4113	3	-	1	1	0	2.11722	2.24384	0	72.7958	0	8.88788	2.57025	10.1395	18.2676	0.813462	0	2.39139	0	0	6.69452	4.35577	7.43152	2.83358	2.00372	0	0	0	1.08144	1.18843	25.4663	1.62102	1.10219	0	2.16259	3.33594	1.29833	0	1.04359	0.679223
ENSG00000260876	LINC01229	long intergenic non-protein coding RNA 1229 [Source:HGNC Symbol;Acc:HGNC:49682]	chr16	79676048	79809716	1	q23.2	40.75	lncRNA	9941	3	-	1	1	2.57245	0	0	0.878725	0	5.6264	2.73473	0.85675	0	4.29825	0	0	0	1.53418	0	1.67363	0	0.825725	27.3913	2.00372	1.66748	1.23629	2.02705	0	0	2.31512	0	3.30658	1.72643	0	1.66797	0	36.5095	1.04359	0.679223
ENSG00000228139	LINC01402	long intergenic non-protein coding RNA 1402 [Source:HGNC Symbol;Acc:HGNC:50685]	chrX	120117642	120119700	-1	q24	41.23	lncRNA	279	3	-	1	1	0	0	0	0	0	0	0	0	0	0	0	0	0	0	0	0	0	0	0	0	0	0	0	0	0	0	0	0	0	0	0	0	0	0	0
ENSG00000236849	LINC01474	long intergenic non-protein coding RNA 1474 [Source:HGNC Symbol;Acc:HGNC:51111]	chr9	72871130	72874135	-1	q21.13	36.93	lncRNA	1264	3	-	1	1	17.1497	0	4.48768	0.878725	0	1.12528	0	0	0	0	0	0	0	0	6.98318	0	0	0	7.55621	1.00186	1.66748	0	2.02705	1.08144	0	0	0.810509	0	0	1.44173	0	26.6157	0.608492	0	0
ENSG00000238099	LINC01625	long intergenic non-protein coding RNA 1625	chr6	139435636	139474658	-1	q24.1		lncRNA		3	-	1	1	0	0	0	2.63618	0	5.6264	1.36737	0	0	10.7456	0	5.95961	0	0	0	4.18408	181.076	0	2.83358	0	0	0	0	5.40718	0	0	0	11.0219	0	11.5338	0	0	0.608492	3.13078	7.47145
ENSG00000259847	LINC02126	long intergenic non-protein coding RNA 2126	chr16	65141751	65176713	-1	q21		lncRNA		3	-	1	1	0	0	0	0	0	0	0	0	0	0	0	0	0	0	0	0	0	0	0	0	0	0	0	0	0	0	0	0	0	0	0	0	0	0	0
ENSG00000258675	LINC02308	long intergenic non-protein coding RNA 2308	chr14	81441987	81450371	-1	q31.1		lncRNA		3	-	1	1	0	0	0	0	0	1.12528	5.46947	0	0	1.07456	0	0	0	1.53418	0	0	0	0	17.0015	0	0	0	50.6763	0	0	0.57878	0.810509	0	0.863217	12.9755	0	0	12.7783	5.21797	0
ENSG00000259225	LINC02345	long intergenic non-protein coding RNA 2345 [Source:HGNC Symbol;Acc:HGNC:53267]	chr15	37980676	38062340	1	q14	39.45	lncRNA	2687	3	-	1	1	0	0	0.747946	0	0	0	0	0	0	0	0	1.19192	0	0	1.7458	0.836815	0.622253	0	0	0	0	1.23629	0	1.08144	0	1.73634	0	0	0	0	0	0	0	0	0
ENSG00000231367	LINC02613	long intergenic non-protein coding RNA 2613 [Source:HGNC Symbol;Acc:HGNC:54068]	chr2	38406527	38515934	-1	p22.1	45.52	lncRNA	5386	3	-	1	1	0	13.7619	0	0	1.91568	39.3848	38.9699	0	5.06973	2.14913	0	11.9192	17.9354	0	0	0.836815	0	11.5601	44.3927	0	0.83374	0	11.1488	41.0946	8.31902	6.36658	8.9156	50.7008	4.31609	0	0	0.649165	51.7219	9.39235	0.679223
ENSG00000223561	LINC03007	Long intergenic non-protein coding RNA 3007	chr7	25593304	25751032	-1	p15.2	41.03	lncRNA	7296	3	-	1	1	0.857483	2.11722	2.24384	1.75745	11.4941	2.25056	0	0.85675	0	7.52194	3.25385	0	1.19569	0	0	3.34726	0	2.47717	2.83358	0	1.66748	0	0	7.57005	0	0	4.86306	12.1241	0	1.44173	0	0.649165	0.608492	0	0
ENSG00000261390	MAFTRR	MAF transcriptional regulator RNA	chr16	79715220	79770651	-1	q23.2		lncRNA		3	-	1	1	1.71497	3.17583	10.4712	0	0	4.50112	4.78578	0	0	3.22369	0	0	0	0	0	4.18408	1.86676	2.47717	8.50074	8.01488	24.1785	0	0	0	0	0	0	16.5329	0.863217	5.76691	15.8457	0	105.269	0	0
ENSG00000268654	MIMT1	MER1 repeat containing imprinted transcript 1	chr19	56840866	56848556	1	q13.43		lncRNA		3	-	1	1	1.71497	0	0	0	0	0	0	0	0	8.59651	0	10.7273	0	0	1.7458	0	0	0	0	0	0	0	0	0	0	0	0	0	0	0	0	0	3.04246	0	0
ENSG00000274536	MIR223HG	MIR223 host gene [Source:HGNC Symbol;Acc:HGNC:54520]	chrX	66015461	66020422	1	q12	43.47	lncRNA	4053	3	-	1	1	2.57245	0	0	2.63618	0	0	0	2.57025	3.04184	1.07456	0	0	1.19569	1.53418	0	0	1.2445	18.9917	5.66716	0	0	0	1.01353	4.32574	0	0	0	3.30658	0	0	0	0	0	0	1.35845
ENSG00000235890	TSPEAR-AS1	TSPEAR antisense RNA 1 [Source:HGNC Symbol;Acc:HGNC:1271]	chr21	44506807	44516575	1	q22.3	58.67	lncRNA	2355	3	-	1	1	0	4.23444	94.9891	0	0	5.6264	210.575	0	1.01395	65.5484	60.1962	1.19192	0	0	0	0	399.486	1.65145	7.55621	10.0186	103.384	1.23629	3.04058	183.844	26.1455	0	2.43153	121.241	11.2218	3.60432	2.50195	66.2148	0	2.08719	25.1313
ENSG00000228677	TTC3-AS1	TTC3 antisense RNA 1 [Source:HGNC Symbol;Acc:HGNC:40595]	chr21	37187666	37193926	-1	q22.13	39.27	lncRNA	1097	3	-	1	1	1.71497	1.05861	0	0	0	0	2.05105	0	1.01395	0	0	0	0	0	1.7458	1.67363	0	0.825725	0.944527	1.00186	0	0	0	0	0	0	0	0	0	0	2.50195	3.24582	0	0	0
ENSG00000204241	LINC02731	long intergenic non-protein coding RNA 2731 [Source:HGNC Symbol;Acc:HGNC:54248]	chr11	134032216	134067936	1	q25	51.52	lncRNA	6849	3	-	1	1	3.42993	0	0	0	1.91568	7.87696	0.683683	0	10.1395	5.37282	0	5.95961	0	0	0	0	0.622253	0.825725	0	32.0595	47.5232	0	1.01353	0	0	0	0	5.51096	0	16.5799	10.8418	0	0	0	5.43378
ENSG00000225746	MEG8	maternally expressed 8, small nucleolar RNA host gene	chr14	100894770	101038859	1	q32.2		lncRNA		3	[193]	1	1	0.857483	38.11	3.73973	0	36.3979	418.604	778.715	0	0	0	0.813462	0	435.233	0	0	68.6189	0.622253	0	0	3.00558	0.83374	1.23629	1.01353	1.08144	13.0727	0	0	1.10219	0	1.44173	1.66797	0	0	0	0
ENSG00000260565	ERVK13-1	endogenous retrovirus group K13 member 1 [Source:HGNC Symbol;Acc:HGNC:27548]	chr16	2660348	2682379	-1	p13.3	48.82	lncRNA	11465	9	[194]	2	1	1046.99	531.422	690.354	315.462	831.405	667.291	1216.96	333.276	728.014	935.945	492.145	400.486	428.059	358.998	1272.68	1061.92	484.735	1253.45	1246.78	955.775	1146.39	208.932	903.051	480.157	348.211	114.599	812.13	2155.89	556.775	218.422	874.016	584.248	442.374	1096.82	884.348
ENSG00000233006	MIR3936HG	MIR3936 host gene [Source:HGNC Symbol;Acc:HGNC:40538]	chr5	132311285	132370170	-1	q31.1	43.74	lncRNA	4732	4	-	3	1	130.337	146.088	71.0549	121.264	1749.02	163.166	205.105	187.628	129.785	108.531	2.44039	39.3334	263.053	75.1748	59.3571	465.269	108.272	702.692	451.484	477.887	93.3789	101.375	427.708	229.264	86.7555	451.449	714.059	181.862	37.9816	56.9482	160.959	273.947	517.827	350.648	437.42
ENSG00000235092	ID2-AS1	ID2 antisense RNA 1 [Source:HGNC Symbol;Acc:HGNC:51103]	chr2	8666636	8681864	-1	p25.1	48.45	lncRNA	7084	7	-	4	1	164.637	178.905	631.266	203.864	296.93	408.477	14.3574	53.1185	108.492	70.9212	15.4558	312.284	83.6986	719.53	293.294	92.0497	98.3159	85.8754	17.946	119.221	682.833	32.1434	106.42	1093.33	259.078	43.4085	137.787	241.38	3.45287	183.82	296.899	166.186	283.557	150.278	189.503
ENSG00000245025	ENSG00000245025	novel transcript, antisense to RHOBTB2	chr8	22984596	23019335	-1	p21.3		lncRNA		4	-	7	1	56.5939	128.092	22.4384	51.8448	45.9763	49.5123	188.013	105.38	28.3905	44.0571	299.354	42.9092	139.896	131.939	78.5608	44.3512	105.783	67.7094	113.343	117.218	37.5183	22.2531	90.2038	88.6777	17.8265	41.6722	71.3248	56.2118	47.477	30.9971	95.0742	29.2124	73.0191	74.0952	114.789
ENSG00000268364	SMC5-DT	SMC5 divergent transcript [Source:HGNC Symbol;Acc:HGNC:48718]	chr9	70193997	70258866	-1	q21.12	39.57	lncRNA	2402	3	-	7	1	43.7316	32.8169	16.4548	7.90853	38.3136	18.0045	87.5115	71.967	12.1674	19.3421	18.7096	51.2527	34.6751	13.8076	17.458	28.4517	19.9121	114.776	23.6132	27.0502	45.8557	33.3797	9.12173	61.6418	16.638	150.483	59.9777	14.3285	32.8023	50.4604	44.2012	30.5107	57.8068	19.8283	25.8105
ENSG00000272143	FGF14-AS2	FGF14 antisense RNA 2 [Source:HGNC Symbol;Acc:HGNC:44368]	chr13	102394630	102395703	1	q33.1	51.49	lncRNA	1074	8	-	8	1	0.857483	0	40.3891	21.9681	1.91568	7.87696	234.503	0	55.7671	34.386	61.0097	177.596	37.0665	133.474	36.6617	71.1293	1.2445	37.1576	17.946	1.00186	90.8777	50.6877	216.894	11.8958	35.653	31.2541	26.7468	12.1241	140.704	216.259	73.3906	59.7231	1.82548	16.6975	3.39611
ENSG00000238197	PAXBP1-AS1	PAXBP1 antisense RNA 1 [Source:HGNC Symbol;Acc:HGNC:39603]	chr21	32728097	32747065	1	q22.11	38.77	lncRNA	10289	5	-	8	1	334.418	132.326	216.904	45.6937	356.316	800.074	319.28	132.796	284.919	290.132	229.396	75.0911	312.076	87.4482	459.144	369.036	175.475	341.024	186.072	427.794	185.09	65.5231	147.975	595.871	261.455	49.7751	294.215	321.84	164.011	139.847	320.25	258.368	163.684	392.391	246.558
ENSG00000244479	OR2A1-AS1	OR2A1 antisense RNA 1 [Source:HGNC Symbol;Acc:HGNC:49168]	chr7	144300395	144356181	-1	q35	41.47	lncRNA	2532	4	-	8	1	1.71497	0	0.747946	68.5405	86.2056	79.8949	30.0821	54.832	66.9205	193.421	22.7769	64.3638	41.8493	69.0381	0	35.1463	0	50.3692	115.232	21.0391	58.3618	38.3248	128.718	33.5245	46.3489	33.5692	126.439	48.4965	128.619	2.16259	75.8926	4.54415	87.6229	29.2206	29.8858
ENSG00000203876	ADD3-AS1	ADD3 antisense RNA 1 [Source:HGNC Symbol;Acc:HGNC:48682]	chr10	109940104	110008381	-1	q25.1	41.95	lncRNA	9085	4	-	8	1	3.42993	0	41.885	0	3.83136	33.7584	12.3063	5.1405	15.2092	5.37282	0.813463	1.19192	2.39139	0	15.7122	13.389	34.8462	3.3029	25.5022	19.0353	35.8508	0	9.12173	32.4431	13.0728	6.36658	12.1576	15.4307	6.04252	32.4388	5.00391	11.685	69.3681	8.34875	10.1883
ENSG00000272894	MIOS-DT	MIOS divergent transcript [Source:HGNC Symbol;Acc:HGNC:55187]	chr7	7552462	7566996	-1	p21.3	41.47	lncRNA	1730	3	-	8	1	11.1473	24.348	25.4302	19.3319	181.989	99.0247	219.462	218.471	207.859	19.3421	30.0981	138.263	22.7182	118.132	10.4748	61.9243	22.4011	85.0496	9.44527	23.0428	215.105	42.0337	97.2984	117.876	28.5224	70.0324	81.8614	61.7228	17.2644	60.5525	49.2051	116.85	88.8399	12.5231	92.3743
ENSG00000246250	ENSG00000246250	novel transcript	chr11	43827517	43880726	-1	p11.2	39.95	lncRNA	5494	3	-	8	1	54.8789	24.348	19.4466	2.63618	90.0369	21.3803	32.8168	33.4133	39.5439	76.294	36.6058	13.1111	4.78278	15.3418	96.0188	56.9034	20.5343	42.9377	85.0074	74.1377	7.50366	13.5991	40.541	74.6191	19.0149	5.7878	39.715	46.2921	12.9483	12.9755	25.8535	42.8449	17.6463	20.8719	67.9223
ENSG00000249249	TICAM2-AS1	TICAM2 antisense RNA 1	chr5	115602057	115623897	1	q22.3		lncRNA		3	-	8	1	33.4418	16.9378	14.211	12.3021	67.0488	38.2595	49.9089	27.416	7.09763	18.2676	26.0308	53.6365	44.2407	15.3418	5.23739	16.7363	11.2005	90.8297	26.4468	46.0856	1.66748	17.308	30.4058	35.6874	10.6959	8.10292	10.5366	15.4307	12.9483	0.720863	18.3477	5.19332	24.3397	60.5285	32.6027
ENSG00000227733	ENSG00000227733	novel transcript	chr1	148159213	148255012	-1	q21.2	40.81	lncRNA	16052	3	-	10	1	0.857483	28.5825	0	0.878725	103.447	75.3938	100.501	1.7135	21.2929	4.29825	1.62692	65.5557	43.045	0	1.7458	69.4557	533.893	83.3982	65.1723	0	1.66748	8.654	6.08115	4.32574	0	205.467	1.62102	27.5548	19.854	5.76691	8.33985	1.29833	27.9906	2.08719	46.8664
ENSG00000269068	ENSG00000269068	novel transcript, antisense to OBSL1	chr2	219559083	219559626	1	q35	56.8	lncRNA	544	3	-	10	1	0.857483	6.35166	0	2.63618	30.6509	24.7562	82.042	1.7135	8.11157	4.29825	0	2.38384	15.544	7.6709	6.98318	10.8786	8.08929	23.1203	32.1139	27.0502	0	0	10.1352	6.48861	5.94216	3.47268	51.8726	12.1241	4.31609	2.88345	5.83789	9.73747	41.986	17.7411	17.6598
ENSG00000186594	MIR22HG	MIR22 host gene [Source:HGNC Symbol;Acc:HGNC:28219]	chr17	1711493	1717174	-1	p13.3	56.95	lncRNA	2986	12	[195]	11	1	3421.36	1316.91	316.381	345.339	1704.95	924.981	646.764	574.88	411.662	1861.14	1192.54	918.972	425.667	1245.75	1251.74	1557.31	650.254	1713.38	3728.05	1484.76	2937.27	370.886	1430.08	570.998	657.203	1078.27	799.162	2162.5	2924.58	133.36	831.483	3053.02	2828.27	947.583	2193.89
ENSG00000248429	GASK1B-AS1	GASK1B antisense RNA 1	chr4	158170752	158202877	1	q32.1		lncRNA		4	-	11	1	7.71734	4.23444	0	1.75745	55.5547	1.12528	0	324.708	5.06973	1.07456	80.5328	11.9192	1.19569	0	513.264	10.0418	3.73352	14.863	279.58	7.01302	846.246	3.70885	1.01353	7.57005	34.4645	0	0	6.61315	0	3.60432	2.50195	1.29833	11.5613	160.714	0.679223
ENSG00000170919	TPT1-AS1	TPT1 antisense RNA 1 [Source:HGNC Symbol;Acc:HGNC:43686]	chr13	45341345	45417975	1	q14.13	46.83	lncRNA	14498	4	[196]	11	1	1033.27	664.807	318.625	847.97	908.032	1084.77	1272.33	1114.63	589.103	1390.49	605.216	654.365	786.767	2089.55	1326.8	1752.29	910.356	1357.49	1761.54	1243.31	180.922	1164.58	891.902	421.76	1598.44	1582.39	2438.01	1884.75	986.657	969.561	974.094	2871.26	845.196	882.881	413.647
ENSG00000232931	LINC00342	long intergenic non-protein coding RNA 342 [Source:HGNC Symbol;Acc:HGNC:42470]	chr2	95807052	95835003	-1	q11.1	43.14	lncRNA	8599	5	-	12	1	1483.44	1431.24	569.935	317.22	547.884	675.168	236.554	341.844	1350.58	1319.56	2406.22	1182.39	622.957	128.871	2599.49	2503.75	647.143	1624.2	453.373	1766.28	389.357	254.675	1952.05	977.618	1858.71	466.497	1100.67	1668.72	3132.62	518.301	1441.12	1861.8	736.884	2512.97	2332.45
ENSG00000247982	LINC00926	long intergenic non-protein coding RNA 926 [Source:HGNC Symbol;Acc:HGNC:27514]	chr15	57300365	57307769	1	q21.3	49.29	lncRNA	3669	4	-	12	1	66.0262	8.46888	34.4055	8.78725	42.145	23.6309	28.031	12.8513	36.5021	52.6536	61.0097	75.0911	41.8493	18.4102	40.1533	112.133	31.7349	36.3319	98.2308	86.16	23.3447	7.41771	51.6898	37.8503	49.9141	9.26048	59.9777	80.46	69.9206	71.3655	15.0117	90.2339	86.4059	69.9208	72.6769
ENSG00000250056	LINC01018	long intergenic non-protein coding RNA 1018 [Source:HGNC Symbol;Acc:HGNC:27394]	chr5	6582136	6600288	1	p15.31	46.32	lncRNA	7318	4	-	12	1	0.857483	3.17583	47.8685	0	55.5547	10.1275	79.3073	3.427	31.4323	178.377	3.25385	643.638	193.702	0	0	0.836815	1.86676	61.9293	0.944527	1.00186	0	6.18142	2.02705	12.9772	15.4496	27.2027	0	2.20438	0.863217	5.76691	96.7422	0.649165	3.04246	10.4359	46.8664
ENSG00000230487	PSMG3-AS1	PSMG3 antisense RNA 1 (head to head) [Source:HGNC Symbol;Acc:HGNC:22230]	chr7	1570073	1589626	1	p22.3	53.15	lncRNA	6436	3	-	12	1	725.431	107.978	246.822	437.605	547.884	1000.37	211.258	50.5483	52.7252	50.5045	235.091	71.5153	137.505	213.251	637.216	85.3552	597.363	42.9377	58.5607	578.073	600.293	289.291	190.543	462.854	193.714	266.239	1458.92	876.243	102.723	164.357	414.49	118.148	346.841	41.7438	99.1666
ENSG00000259577	CERNA1	competing endogenous lncRNA 1 for miR-4707-5p and miR-4767 [Source:HGNC Symbol;Acc:HGNC:52664]	chr15	52179999	52206915	1	q21.2	43.13	lncRNA	3231	5	[197]	13	1	31.7269	16.9378	8.22741	7.0298	30.6509	57.3893	22.5616	17.9918	33.4602	6.44738	6.5077	54.8284	25.1096	4.60254	12.2206	32.6358	13.0673	48.7178	6.61169	46.0856	48.3569	22.2531	20.2705	30.2802	48.7257	23.73	6.48407	18.7373	6.90574	13.6964	16.6797	13.6325	10.3444	38.613	12.9052
ENSG00000281332	LINC00997	long intergenic non-protein coding RNA 997 [Source:HGNC Symbol;Acc:HGNC:48952]	chr7	32760279	32762924	1	p14.3	47.54	lncRNA	2646	4	-	13	1	116.618	132.326	38.1452	188.047	289.268	111.403	149.043	83.9616	102.409	124.649	218.821	151.374	156.636	35.2861	164.105	137.238	116.984	215.514	61.3942	65.1209	676.997	85.3037	68.9197	62.7233	243.629	74.0839	273.952	200.599	101.86	108.85	150.117	110.358	212.364	118.97	122.26
ENSG00000231609	ENSG00000231609	novel transcript, antisense to EHBP1	chr2	62957326	63048640	-1	p15	35.93	lncRNA	3314	3	-	13	1	27.4395	19.055	7.47946	5.27235	42.145	28.132	17.0921	11.9945	29.4045	79.5177	27.6577	34.5657	39.4579	12.2734	47.1365	120.501	17.4231	43.7634	172.848	38.0707	30.0146	12.3628	68.9197	20.5473	49.9141	12.7332	39.715	59.5184	33.6655	15.1381	22.5176	34.4057	19.4718	49.0489	54.3378
ENSG00000125804	FAM182A	family with sequence similarity 182 member A [Source:HGNC Symbol;Acc:HGNC:16222]	chr20	25985210	26086917	1	p11.1	45.7	lncRNA	10282	3	-	13	1	32.5843	51.8719	21.6904	6.15108	176.242	87.7719	110.757	17.135	39.5439	12.8948	13.8289	1.19192	34.6751	0	186.8	37.6567	30.4904	7.43152	18.8905	191.355	29.1809	0	311.152	36.7688	85.5671	148.168	126.439	244.687	85.4585	0.720863	82.5645	34.4057	27.9906	19.8283	97.8081
ENSG00000224032	EPB41L4A-AS1	EPB41L4A antisense RNA 1 [Source:HGNC Symbol;Acc:HGNC:30749]	chr5	112160526	112164818	1	q22.1	43.93	lncRNA	3903	8	-	14	1	2759.38	1627.08	604.34	1650.25	1214.54	1412.23	1015.95	1165.18	861.855	1886.93	1320.25	3278.98	1768.43	3289.28	1572.96	1336.39	1681.33	1134.55	604.497	762.416	217.606	902.488	1974.35	1524.82	1694.7	1321.93	1195.5	1150.69	1294.83	1009.21	917.383	3391.89	2104.17	688.772	6903.62
ENSG00000259976	ENSG00000259976	novel transcript	chr3	114314501	114329714	-1	q13.31		lncRNA		4	-	14	1	352.425	823.599	8.22741	2548.3	1367.8	1210.8	149.727	1389.65	307.226	773.686	61.0097	641.254	951.773	285.357	1777.22	2135.55	118.85	1228.68	4107.75	114.212	2739.67	437.645	119.596	649.943	2643.07	873.958	3220.96	2066.61	352.193	425.309	175.971	479.733	1479.24	1438.07	1964.31
ENSG00000224165	DNAJC27-AS1	DNAJC27 antisense RNA 1 [Source:HGNC Symbol;Acc:HGNC:42943]	chr2	24971390	25039716	1	p23.3	45.17	lncRNA	5787	3	-	14	1	59.1663	4.23444	33.6576	16.6958	28.7352	40.5101	19.8268	6.854	12.1674	0	9.76155	10.7273	10.7613	12.2734	3.49159	11.7154	30.4904	10.7344	11.3343	36.067	30.8484	12.3628	10.1352	59.479	20.2034	49.7751	113.471	5.51096	1.72643	0.720863	15.8457	16.8783	61.4577	17.7411	25.1313
ENSG00000238018	ENSG00000238018	novel transcript, antisense to SPTBN1	chr2	54661011	54680045	-1	p16.2	44.48	lncRNA	1236	3	-	14	1	1.71497	3.17583	0	6.15107	24.9038	2.25056	9.57157	6.854	18.251	8.59651	7.32116	3.57577	9.56556	7.6709	59.3571	15.8995	8.08929	9.08297	27.3913	5.0093	1.66748	0	4.0541	10.8144	4.75373	4.05146	8.9156	11.0219	12.9483	0.720863	12.5098	7.14081	1.21698	27.1334	25.1313
ENSG00000196295	GARS1-DT	GARS1 divergent transcript	chr7	30516309	30595286	-1	p14.3		lncRNA		3	-	14	1	1162.75	821.482	640.99	480.663	4371.58	1061.14	762.307	752.227	532.322	428.751	1867.71	213.354	1078.52	214.785	2843.9	1769.86	941.468	1101.52	681.948	1471.73	536.929	425.282	795.617	1238.24	467.054	269.712	1406.23	833.257	337.518	529.114	658.848	1580.72	1355.11	917.319	1114.6
ENSG00000228242	XPC-AS1	XPC antisense RNA 1 [Source:HGNC Symbol;Acc:HGNC:55014]	chr3	14144637	14165978	1	p25.1	46.55	lncRNA	4015	3	-	14	1	53.1639	37.0514	17.9507	34.2703	19.1568	75.3938	51.9599	77.9643	88.2134	94.5616	78.9059	88.2023	72.9374	104.324	96.0188	225.94	109.516	129.639	59.5052	64.1191	180.088	56.8691	71.9603	49.746	32.0877	42.251	116.713	71.6425	56.1091	13.6964	49.2051	160.344	66.9342	39.6566	107.317
ENSG00000291088	NPEPPSP1	NPEPPS pseudogene 1	chr17	38195703	38257381	-1			lncRNA		4	-	NA	NA
ENSG00000291115	ZNF300P1	Zinc finger protein 300 pseudogene 1	chr5	150930456	150946598	-1			lncRNA		3	[43]	NA	NA
ENSG00000277954	ENSG00000277954	novel transcript, antisense to WWOX	chr16	79202624	79206739	-1	q23.2	42.32	lncRNA	4116	3	-	NA	NA
ENSG00000277351	ENSG00000277351	novel transcript, antisense to SLC51B	chr15	65049188	65049802	-1	q22.31	52.36	lncRNA	615	3	-	NA	NA
[truncated: 23 more columns]
