# Supplementary material for: Identification of lncRNAs Deregulated in Epithelial Ovarian Cancer Based on a Gene Expression Profiling Meta-Analysis
Source: Int J Mol Sci. 2023 Jun 28;24(13):10798. doi: 10.3390/ijms241310798 (PMC10341812; doi:10.3390/ijms241310798)
Supplement: Supplementary file 1 [file ijms-24-10798-s001.zip › Supplementary Table S5.xlsx]

## Sheet: STS5 Title
	Supplementary Table S5.- List of studies used in the “Prognostic” meta analysis with study information and results from the individual analyses.

## Sheet: TS5 Study information
Series	Country	Year	Platform	Sample source	Subtype	Cancer patients	Overall survival	Disease-free survival	Reference
GSE18520	USA	2009	Affymetrix Human Genome U133 Plus 2.0 Array	Tissue	High-grade serous	53	Yes	No	[123]
GSE19829	USA	2010	Affymetrix Human Genome U133 Plus 2.0 Array + Affymetrix Human Genome U95 Version 2 Array	Tissue	-	61	Yes	Yes	[198]
GSE26193	France	2010	Affymetrix Human Genome U133 Plus 2.0 Array	Tissue	Clear cell, endometrioid, mucinous, and serous	104	Yes	Yes	[199]
GSE63885	Poland	2014	Affymetrix Human Genome U133 Plus 2.0 Array	Tissue	Serous, endometrioid, clear cell and undifferentiated	34	Yes	Yes	[200]
GSE30161	USA	2011	Affymetrix Human Genome U133 Plus 2.0 Array	Tissue	-	53	Yes	Yes	[201]
GEPIA2	-	-	RNA-Seq	Tissue	-	428	Yes	Yes	[115]
GSE49997	Austria	2013	ABI Human Genome Survey Microarray Version 2	Tissue	-	204	Yes	Yes	[202]
GSE17260	Japan	2009	Agilent Whole Human Genome Microarray 4x44K G4112F	Tissue	Serous	110	Yes	Yes	[203]
GSE26712	USA	2008	Affymetrix Human Genome U133A Array	Tissue	-	185	Yes	Yes	[124]
GSE31245	USA	2011	Affymetrix Human Genome U133 Plus 2.0 Array	Tissue	-	57	Yes	No	[204]
GSE32062	Japan	2011	Affymetrix Human Genome U133 Plus 2.0 Array + Agilent Whole Human Genome Microarray 4x44K G4112F	Tissue	High grade serous	270	Yes	Yes	[205]

## Sheet: GSE18520 OS
Parametric p-value	FDR	Hazard Ratio	SD of log intensities	ProbeSet	Gene_ID	Gene_description	Chromosome_scaffold_name	Gene_start_bp	Gene_end_bp	Strand	Karyotype_band	Gene_name	Gene_GC_content	Gene_type	Gene_Length
0.0078431	1	1.784	0.795	202421_at	ENSG00000143061	immunoglobulin superfamily member 3 [Source:HGNC Symbol;Acc:HGNC:5950]	chr1	116574399	116667755	-1	p13.1	IGSF3	46.14	protein_coding	7400
0.0085386	1	2.406	0.475	215783_s_at	ENSG00000162551	alkaline phosphatase, biomineralization associated [Source:HGNC Symbol;Acc:HGNC:438]	chr1	21509397	21578410	1	p36.12	ALPL	51.62	protein_coding	2980
0.0087546	1	1.896	0.768	219134_at	ENSG00000162618	adhesion G protein-coupled receptor L4 [Source:HGNC Symbol;Acc:HGNC:20822]	chr1	78889764	79282124	-1	p31.1	ADGRL4	35.25	protein_coding	5798
0.0062869	1	0.688	1.3	208966_x_at	ENSG00000163565	interferon gamma inducible protein 16 [Source:HGNC Symbol;Acc:HGNC:5395]	chr1	158999968	159055155	1	q23.1	IFI16	38.34	protein_coding	5294
0.0060176	1	0.603	1.043	208965_s_at	ENSG00000163565	interferon gamma inducible protein 16 [Source:HGNC Symbol;Acc:HGNC:5395]	chr1	158999968	159055155	1	q23.1	IFI16	38.34	protein_coding	5294
0.0028007	1	0.664	1.297	206332_s_at	ENSG00000163565	interferon gamma inducible protein 16 [Source:HGNC Symbol;Acc:HGNC:5395]	chr1	158999968	159055155	1	q23.1	IFI16	38.34	protein_coding	5294
0.0038535	1	2.87	0.418	226828_s_at	ENSG00000163909	hes related family bHLH transcription factor with YRPW motif like [Source:HGNC Symbol;Acc:HGNC:4882]	chr1	39623435	39639643	-1	p34.2	HEYL	51.58	protein_coding	4077
0.0069414	1	0.499	0.572	210038_at	ENSG00000065675	protein kinase C theta [Source:HGNC Symbol;Acc:HGNC:9410]	chr10	6427143	6580301	-1	p15.1	PRKCQ	43.1	protein_coding	3295
0.0087278	1	1.703	0.703	203304_at	ENSG00000095739	BMP and activin membrane bound inhibitor [Source:HGNC Symbol;Acc:HGNC:30251]	chr10	28677510	28682932	1	p12.1	BAMBI	46.04	protein_coding	2139
0.0059494	1	1.543	1.044	210559_s_at	ENSG00000170312	cyclin dependent kinase 1 [Source:HGNC Symbol;Acc:HGNC:1722]	chr10	60778331	60794852	1	q21.2	CDK1	35.07	protein_coding	3931
0.0084678	1	1.565	0.973	203214_x_at	ENSG00000170312	cyclin dependent kinase 1 [Source:HGNC Symbol;Acc:HGNC:1722]	chr10	60778331	60794852	1	q21.2	CDK1	35.07	protein_coding	3931
0.0038392	1	0.703	1.741	205363_at	ENSG00000129151	gamma-butyrobetaine hydroxylase 1 [Source:HGNC Symbol;Acc:HGNC:964]	chr11	27040725	27127809	1	p14.2	BBOX1	37.38	protein_coding	2464
0.0077945	1	1.51	1.162	232914_s_at	ENSG00000137501	synaptotagmin like 2 [Source:HGNC Symbol;Acc:HGNC:15585]	chr11	85694224	85811159	-1	q14.1	SYTL2	40.22	protein_coding	11258
0.0022924	1	0.708	1.504	207109_at	ENSG00000137709	POU class 2 homeobox 3 [Source:HGNC Symbol;Acc:HGNC:19864]	chr11	120236640	120319945	1	q23.3	POU2F3	48.07	protein_coding	6700
0.0041948	1	0.726	1.672	227238_at	ENSG00000169550	mucin 15, cell surface associated [Source:HGNC Symbol;Acc:HGNC:14956]	chr11	26559032	26572263	-1	p14.2	MUC15	33.2	protein_coding	3587
0.0021295	1	0.383	0.643	213221_s_at	ENSG00000170145	salt inducible kinase 2 [Source:HGNC Symbol;Acc:HGNC:21680]	chr11	111602449	111730855	1	q23.1	SIK2	39.63	protein_coding	9740
0.002178	1	1.484	1.253	228033_at	ENSG00000165891	E2F transcription factor 7 [Source:HGNC Symbol;Acc:HGNC:23820]	chr12	77021248	77065569	-1	q21.2	E2F7	40.18	protein_coding	6291
0.009176	1	0.553	0.807	227484_at	ENSG00000196935	SLIT-ROBO Rho GTPase activating protein 1 [Source:HGNC Symbol;Acc:HGNC:17382]	chr12	63844700	64162217	1	q14.2	SRGAP1	39.42	protein_coding	26230
0.0075221	1	1.384	1.454	213765_at	ENSG00000197614	microfibril associated protein 5 [Source:HGNC Symbol;Acc:HGNC:29673]	chr12	8637346	8662888	-1	p13.31	MFAP5	42.51	protein_coding	3889
0.0099716	1	1.4	1.423	209758_s_at	ENSG00000197614	microfibril associated protein 5 [Source:HGNC Symbol;Acc:HGNC:29673]	chr12	8637346	8662888	-1	p13.31	MFAP5	42.51	protein_coding	3889
0.0053442	1	0.679	1.232	229782_at	ENSG00000255794	rhabdomyosarcoma 2 associated transcript [Source:HGNC Symbol;Acc:HGNC:29893]	chr12	97430884	97598415	1	q23.1	RMST	36.66	lncRNA	10231
0.0087659	1	0.273	0.365	215336_at	ENSG00000023516	A-kinase anchoring protein 11 [Source:HGNC Symbol;Acc:HGNC:369]	chr13	42272152	42323261	1	q14.11	AKAP11	36.45	protein_coding	9915
0.0046798	1	1.421	1.227	211980_at	ENSG00000187498	collagen type IV alpha 1 chain [Source:HGNC Symbol;Acc:HGNC:2202]	chr13	110148963	110307157	-1	q34	COL4A1	44.9	protein_coding	14662
0.0067492	1	2.576	0.452	221810_at	ENSG00000139998	RAB15, member RAS oncogene family [Source:HGNC Symbol;Acc:HGNC:20150]	chr14	64945814	64973226	-1	q23.3	RAB15	52.17	protein_coding	4937
0.0090483	1	1.601	0.927	203700_s_at	ENSG00000211448	iodothyronine deiodinase 2 [Source:HGNC Symbol;Acc:HGNC:2884]	chr14	80197526	80387757	-1	q31.1	DIO2	37.62	protein_coding	7393
0.0061538	1	1.779	0.795	218820_at	ENSG00000227051	chromosome 14 open reading frame 132 [Source:HGNC Symbol;Acc:HGNC:20346]	chr14	96039362	96093971	1	q32.2	C14orf132	47.75	protein_coding	7819
0.0058024	1	2.044	0.597	213012_at	ENSG00000069869	NEDD4 E3 ubiquitin protein ligase [Source:HGNC Symbol;Acc:HGNC:7727]	chr15	55826922	55993660	-1	q21.3	NEDD4	38.49	protein_coding	9036
0.0042537	1	2.728	0.384	207124_s_at	ENSG00000069966	G protein subunit beta 5 [Source:HGNC Symbol;Acc:HGNC:4401]	chr15	52115100	52191392	-1	q21.2	GNB5	45.39	protein_coding	13330
0.0008157	1	2.142	0.59	204130_at	ENSG00000176387	hydroxysteroid 11-beta dehydrogenase 2 [Source:HGNC Symbol;Acc:HGNC:5209]	chr16	67430652	67437553	1	q22.1	HSD11B2	59.84	protein_coding	2670
0.00952	1	1.214	2.068	238021_s_at	ENSG00000245694	colorectal neoplasia differentially expressed [Source:HGNC Symbol;Acc:HGNC:37078]	chr16	54845189	54929189	-1	q12.2	CRNDE	39.73	lncRNA	14708
0.0074587	1	2.005	0.612	222105_s_at	ENSG00000168256	NFKB inhibitor interacting Ras like 2 [Source:HGNC Symbol;Acc:HGNC:17898]	chr17	42011382	42025644	1	q21.2	NKIRAS2	49.4	protein_coding	5545
0.0044644	1	1.441	1.14	1562484_at	ENSG00000180336	meiosis specific with coiled-coil domain [Source:HGNC Symbol;Acc:HGNC:26670]	chr17	44656404	44690308	1	q21.31	MEIOC	40.15	protein_coding	8611
0.0011417	1	1.623	1.101	228776_at	ENSG00000182963	gap junction protein gamma 1 [Source:HGNC Symbol;Acc:HGNC:4280]	chr17	44798448	44830816	-1	q21.31	GJC1	44.78	protein_coding	8716
0.006883	1	1.812	0.656	232194_at	ENSG00000101574	methyltransferase like 4 [Source:HGNC Symbol;Acc:HGNC:24726]	chr18	2537525	2571509	-1	p11.32	METTL4	36.78	protein_coding	5724
0.0075754	1	2.144	0.581	219698_s_at	ENSG00000101574	methyltransferase like 4 [Source:HGNC Symbol;Acc:HGNC:24726]	chr18	2537525	2571509	-1	p11.32	METTL4	36.78	protein_coding	5724
0.0078541	1	1.466	1.063	206032_at	ENSG00000134762	desmocollin 3 [Source:HGNC Symbol;Acc:HGNC:3037]	chr18	30989365	31042815	-1	q12.1	DSC3	36.17	protein_coding	7699
0.0015545	1	0.236	0.463	213350_at	ENSG00000142534	ribosomal protein S11 [Source:HGNC Symbol;Acc:HGNC:10384]	chr19	49496365	49499708	1	q13.33	RPS11	53.08	protein_coding	1409
0.0046028	1	2.089	0.663	231130_at	ENSG00000079150	FKBP prolyl isomerase 7 [Source:HGNC Symbol;Acc:HGNC:3723]	chr2	178463664	178478600	-1	q31.2	FKBP7	37.58	protein_coding	3080
0.0058355	1	2.127	0.63	203424_s_at	ENSG00000115461	insulin like growth factor binding protein 5 [Source:HGNC Symbol;Acc:HGNC:5474]	chr2	216672105	216695549	-1	q35	IGFBP5	50.76	protein_coding	6466
0.0023842	1	1.541	1.116	201286_at	ENSG00000115884	syndecan 1 [Source:HGNC Symbol;Acc:HGNC:10658]	chr2	20200797	20225433	-1	p24.1	SDC1	57.56	protein_coding	3613
0.0014011	1	2.444	0.587	219770_at	ENSG00000121964	glycosyltransferase like domain containing 1 [Source:HGNC Symbol;Acc:HGNC:20887]	chr2	143938068	144332568	-1	q22.3	GTDC1	36.87	protein_coding	14162
0.0019379	1	2.263	0.585	212365_at	ENSG00000128641	myosin IB [Source:HGNC Symbol;Acc:HGNC:7596]	chr2	191245185	191425389	1	q32.3	MYO1B	39.67	protein_coding	9533
0.0023476	1	1.565	1.168	212364_at	ENSG00000128641	myosin IB [Source:HGNC Symbol;Acc:HGNC:7596]	chr2	191245185	191425389	1	q32.3	MYO1B	39.67	protein_coding	9533
0.0097583	1	0.8	1.788	212909_at	ENSG00000150551	LY6/PLAUR domain containing 1 [Source:HGNC Symbol;Acc:HGNC:28431]	chr2	132643286	132671579	-1	q21.2	LYPD1	45.08	protein_coding	3979
0.0022526	1	3.322	0.477	214595_at	ENSG00000026559	potassium voltage-gated channel modifier subfamily G member 1 [Source:HGNC Symbol;Acc:HGNC:6248]	chr20	51003656	51023107	-1	q13.13	KCNG1	52.17	protein_coding	5415
0.0034716	1	3.164	0.41	1553960_at	ENSG00000124104	sorting nexin family member 21 [Source:HGNC Symbol;Acc:HGNC:16154]	chr20	45833799	45843276	1	q13.12	SNX21	52.48	protein_coding	4078
0.0072438	1	2.431	0.439	205290_s_at	ENSG00000125845	bone morphogenetic protein 2 [Source:HGNC Symbol;Acc:HGNC:1069]	chr20	6767686	6780246	1	p12.3	BMP2	43.74	protein_coding	3545
0.0045235	1	2.537	0.465	213290_at	ENSG00000142173	collagen type VI alpha 2 chain [Source:HGNC Symbol;Acc:HGNC:2212]	chr21	46098112	46132848	1	q22.3	COL6A2	55.87	protein_coding	5334
0.0081591	1	1.332	1.344	229357_at	ENSG00000154736	ADAM metallopeptidase with thrombospondin type 1 motif 5 [Source:HGNC Symbol;Acc:HGNC:221]	chr21	26917922	26967088	-1	q21.3	ADAMTS5	38.46	protein_coding	9765
0.0091014	1	2.146	0.505	229459_at	ENSG00000219438	TAFA chemokine like family member 5 [Source:HGNC Symbol;Acc:HGNC:21592]	chr22	48489553	48850912	1	q13.32	TAFA5	54.36	protein_coding	3080
0.0088581	1	1.676	0.862	205190_at	ENSG00000120756	plastin 1 [Source:HGNC Symbol;Acc:HGNC:9090]	chr3	142596393	142713664	1	q23	PLS1	38.52	protein_coding	5288
0.0082125	1	0.647	1.101	229657_at	ENSG00000151090	thyroid hormone receptor beta [Source:HGNC Symbol;Acc:HGNC:11799]	chr3	24117153	24495756	-1	p24.2	THRB	38.87	protein_coding	10968
0.0023368	1	2.096	0.677	210135_s_at	ENSG00000168779	short stature homeobox 2 [Source:HGNC Symbol;Acc:HGNC:10854]	chr3	158095905	158106420	-1	q25.32	SHOX2	46.2	protein_coding	5011
0.0098161	1	0.491	0.665	209794_at	ENSG00000196220	SLIT-ROBO Rho GTPase activating protein 3 [Source:HGNC Symbol;Acc:HGNC:19744]	chr3	8980591	9363053	-1	p25.3	SRGAP3	45.29	protein_coding	18924
0.0006169	1	2.41	0.515	227088_at	ENSG00000138735	phosphodiesterase 5A [Source:HGNC Symbol;Acc:HGNC:8784]	chr4	119494397	119628804	-1	q26	PDE5A	36.4	protein_coding	9586
0.0068724	1	1.711	0.855	204844_at	ENSG00000138792	glutamyl aminopeptidase [Source:HGNC Symbol;Acc:HGNC:3355]	chr4	110365733	110565285	1	q25	ENPEP	38.57	protein_coding	7720
0.0093929	1	1.708	0.663	205051_s_at	ENSG00000157404	KIT proto-oncogene, receptor tyrosine kinase [Source:HGNC Symbol;Acc:HGNC:6342]	chr4	54657918	54740715	1	q12	KIT	40.87	protein_coding	5563
0.0026482	1	3.306	0.405	230135_at	ENSG00000164161	hedgehog interacting protein [Source:HGNC Symbol;Acc:HGNC:14866]	chr4	144646156	144745271	1	q31.21	HHIP	36.03	protein_coding	11939
0.00225	1	1.783	0.935	238865_at	ENSG00000254535	poly(A) binding protein cytoplasmic 4 like [Source:HGNC Symbol;Acc:HGNC:31955]	chr4	134196333	134201789	-1	q28.3	PABPC4L	36.25	protein_coding	4985
0.0021031	1	0.623	1.16	225571_at	ENSG00000113594	LIF receptor subunit alpha [Source:HGNC Symbol;Acc:HGNC:6597]	chr5	38474668	38608354	-1	p13.1	LIFR	39.44	protein_coding	12159
0.0048981	1	1.422	1.287	201310_s_at	ENSG00000134986	neuronal regeneration related protein [Source:HGNC Symbol;Acc:HGNC:16834]	chr5	111662621	111997464	-1	q22.1	NREP	38.48	protein_coding	9308
0.0011	1	1.453	1.398	225275_at	ENSG00000164176	EGF like repeats and discoidin domains 3 [Source:HGNC Symbol;Acc:HGNC:3173]	chr5	83940554	84384880	-1	q14.3	EDIL3	35.47	protein_coding	5825
0.0092486	1	1.33	1.399	225202_at	ENSG00000164292	Rho related BTB domain containing 3 [Source:HGNC Symbol;Acc:HGNC:18757]	chr5	95713522	95824383	1	q15	RHOBTB3	40.56	protein_coding	8827
0.005078	1	2.094	0.58	229644_at	ENSG00000085377	prolyl endopeptidase [Source:HGNC Symbol;Acc:HGNC:9358]	chr6	105273218	105454062	-1	q21	PREP	40.86	protein_coding	8917
0.0031362	1	2.347	0.588	221234_s_at	ENSG00000112182	BTB domain and CNC homolog 2 [Source:HGNC Symbol;Acc:HGNC:14078]	chr6	89926528	90296908	-1	q15	BACH2	40.5	protein_coding	9787
0.0021001	1	1.998	0.698	229504_at	ENSG00000112210	RAB23, member RAS oncogene family [Source:HGNC Symbol;Acc:HGNC:14263]	chr6	57186992	57222307	-1	p11.2	RAB23	37.65	protein_coding	4919
0.0062155	1	0.336	0.395	213875_x_at	ENSG00000112308	chromosome 6 open reading frame 62 [Source:HGNC Symbol;Acc:HGNC:20998]	chr6	24704861	24719998	-1	p22.3	C6orf62	39.06	protein_coding	2591
0.0058863	1	1.871	0.653	212872_s_at	ENSG00000124641	mediator complex subunit 20 [Source:HGNC Symbol;Acc:HGNC:16840]	chr6	41905354	41921139	-1	p21.1	MED20	46.57	protein_coding	3278
0.0097237	1	0.605	0.927	222691_at	ENSG00000124786	solute carrier family 35 member B3 [Source:HGNC Symbol;Acc:HGNC:21601]	chr6	8411435	8435561	-1	p24.3	SLC35B3	34.78	protein_coding	3990
0.0073609	1	0.667	1.067	204672_s_at	ENSG00000135299	ankyrin repeat domain 6 [Source:HGNC Symbol;Acc:HGNC:17280]	chr6	89433152	89633834	1	q15	ANKRD6	43.03	protein_coding	8347
0.0042619	1	1.726	0.849	220393_at	ENSG00000146166	lengsin, lens protein with glutamine synthetase domain [Source:HGNC Symbol;Acc:HGNC:21016]	chr6	63275951	63319983	-1	q12	LGSN	36.89	protein_coding	5829
0.0047687	1	2.261	0.625	221050_s_at	ENSG00000172432	GTP binding protein 2 [Source:HGNC Symbol;Acc:HGNC:4670]	chr6	43605316	43629264	-1	p21.1	GTPBP2	46.71	protein_coding	4726
0.0062813	1	1.742	0.827	229088_at	ENSG00000197594	ectonucleotide pyrophosphatase/phosphodiesterase 1 [Source:HGNC Symbol;Acc:HGNC:3356]	chr6	131808016	131895155	1	q23.2	ENPP1	38.19	protein_coding	11423
0.0068302	1	1.605	1.004	205066_s_at	ENSG00000197594	ectonucleotide pyrophosphatase/phosphodiesterase 1 [Source:HGNC Symbol;Acc:HGNC:3356]	chr6	131808016	131895155	1	q23.2	ENPP1	38.19	protein_coding	11423
0.0071695	1	2.479	0.455	228762_at	ENSG00000106003	LFNG O-fucosylpeptide 3-beta-N-acetylglucosaminyltransferase [Source:HGNC Symbol;Acc:HGNC:6560]	chr7	2512529	2529177	1	p22.3	LFNG	62.83	protein_coding	3486
0.0026693	1	1.842	0.85	227376_at	ENSG00000106571	GLI family zinc finger 3 [Source:HGNC Symbol;Acc:HGNC:4319]	chr7	41960949	42264100	-1	p14.1	GLI3	41.7	protein_coding	13799
0.0082103	1	1.606	0.788	205381_at	ENSG00000128606	leucine rich repeat containing 17 [Source:HGNC Symbol;Acc:HGNC:16895]	chr7	102913000	102945111	1	q22.1	LRRC17	39.08	protein_coding	2827
0.0095894	1	0.559	0.79	204681_s_at	ENSG00000136237	Rap guanine nucleotide exchange factor 5 [Source:HGNC Symbol;Acc:HGNC:16862]	chr7	22118236	22357154	-1	p15.3	RAPGEF5	39.43	protein_coding	10257
0.0024995	1	2.62	0.521	219655_at	ENSG00000175600	succinyl-CoA:glutarate-CoA transferase [Source:HGNC Symbol;Acc:HGNC:16001]	chr7	40135005	40860763	1	p14.1	SUGCT	38.71	protein_coding	2829
0.0031748	1	2.818	0.405	208454_s_at	ENSG00000104324	carboxypeptidase Q [Source:HGNC Symbol;Acc:HGNC:16910]	chr8	96645242	97149654	1	q22.1	CPQ	38.13	protein_coding	3442
0.0077493	1	2.211	0.591	202998_s_at	ENSG00000134013	lysyl oxidase like 2 [Source:HGNC Symbol;Acc:HGNC:6666]	chr8	23296897	23425328	-1	p21.3	LOXL2	48.43	protein_coding	5985
0.0032719	1	1.75	0.785	204472_at	ENSG00000164949	GTP binding protein overexpressed in skeletal muscle [Source:HGNC Symbol;Acc:HGNC:4234]	chr8	94249253	94262350	-1	q22.1	GEM	44.2	protein_coding	2648
0.0060728	1	1.583	0.941	205034_at	ENSG00000175305	cyclin E2 [Source:HGNC Symbol;Acc:HGNC:1590]	chr8	94879770	94896678	-1	q22.1	CCNE2	41.61	protein_coding	4397
0.0053044	1	1.357	1.327	201645_at	ENSG00000041982	tenascin C [Source:HGNC Symbol;Acc:HGNC:5318]	chr9	115019575	115118257	-1	q33.1	TNC	41.85	protein_coding	9639
0.0098181	1	1.249	1.876	219087_at	ENSG00000106819	asporin [Source:HGNC Symbol;Acc:HGNC:14872]	chr9	92456205	92482506	-1	q22.31	ASPN	38.34	protein_coding	2470
0.0047233	1	0.641	1.078	229720_at	ENSG00000107262	BAG cochaperone 1 [Source:HGNC Symbol;Acc:HGNC:937]	chr9	33247820	33264720	-1	p13.3	BAG1	46.54	protein_coding	7073
0.0040258	1	0.5	0.679	230679_at	ENSG00000122741	DDB1 and CUL4 associated factor 10 [Source:HGNC Symbol;Acc:HGNC:23686]	chr9	37800554	37867666	1	p13.2	DCAF10	38.55	protein_coding	8291
0.0055813	1	1.874	0.743	203325_s_at	ENSG00000130635	collagen type V alpha 1 chain [Source:HGNC Symbol;Acc:HGNC:2209]	chr9	134641803	134844843	1	q34.3	COL5A1	56	protein_coding	11160
0.0089073	1	0.304	0.409	236368_at	ENSG00000136813	Ecm29 proteasome adaptor and scaffold [Source:HGNC Symbol;Acc:HGNC:29020]	chr9	111360685	111484745	-1	q31.3	ECPAS	39.33	protein_coding	8456
0.0065506	1	1.556	1.039	214043_at	ENSG00000153707	protein tyrosine phosphatase receptor type D [Source:HGNC Symbol;Acc:HGNC:9668]	chr9	8314246	10613002	-1	p23	PTPRD	35.53	protein_coding	11477
0.0072114	1	0.629	1.028	230645_at	ENSG00000172159	FERM domain containing 3 [Source:HGNC Symbol;Acc:HGNC:24125]	chr9	83242990	83538546	-1	q21.32	FRMD3	41.56	protein_coding	6486
0.0009303	1	1.721	0.862	228128_x_at	ENSG00000182752	pappalysin 1 [Source:HGNC Symbol;Acc:HGNC:8602]	chr9	116153791	116402321	1	q33.1	PAPPA	42.35	protein_coding	11585
0.0086144	1	1.391	1.325	204955_at	ENSG00000101955	sushi repeat containing protein X-linked [Source:HGNC Symbol;Acc:HGNC:11309]	chrX	38149336	38220924	-1	p11.4	SRPX	41.48	protein_coding	1987
0.0075541	1	1.368	1.358	201215_at	ENSG00000102024	plastin 3 [Source:HGNC Symbol;Acc:HGNC:9091]	chrX	115561174	115650861	1	q23	PLS3	38.9	protein_coding	4099
0.0013113	1	1.371	1.692	209656_s_at	ENSG00000147027	transmembrane protein 47 [Source:HGNC Symbol;Acc:HGNC:18515]	chrX	34627075	34657285	-1	p21.1	TMEM47	36.98	protein_coding	4040
0.0034191	1	1.553	1.142	213943_at	ENSG00000122691	twist family bHLH transcription factor 1 [Source:HGNC Symbol;Acc:HGNC:12428]	chr7	19020991	19117636	-1	p21.1	TWIST1	37.36	protein_coding	1997
0.0053602	1	1.667	0.943	206026_s_at	ENSG00000123610	TNF alpha induced protein 6 [Source:HGNC Symbol;Acc:HGNC:11898]	chr2	151357592	151380046	1	q23.3	TNFAIP6	38.44	protein_coding	1577
0.0072542	1	1.409	1.142	203476_at	ENSG00000146242	trophoblast glycoprotein [Source:HGNC Symbol;Acc:HGNC:12004]	chr6	82363206	82367420	1	q14.1	TPBG	53.86	protein_coding	3481
0.0005275	1	2.306	0.543	1552946_at	ENSG00000178150	zinc finger protein 114 [Source:HGNC Symbol;Acc:HGNC:12894]	chr19	48270081	48287608	1	q13.33	ZNF114	49.13	protein_coding	3014

## Sheet: GSE19829 OS GPL570
Parametric p-value	FDR	Hazard Ratio	SD of log intensities	ProbeSet	Gene_ID	Gene_description	Chromosome_scaffold_name	Gene_start_bp	Gene_end_bp	Strand	Karyotype_band	Gene_name	Gene_GC_content	Gene_type	Gene_Length
0.0024733	0.804	0.298	0.655	209108_at	ENSG00000000003	tetraspanin 6 [Source:HGNC Symbol;Acc:HGNC:11858]	chrX	100627108	100639991	-1	q22.1	TSPAN6	40.4	protein_coding	4536
0.000203	0.804	0.186	0.712	209109_s_at	ENSG00000000003	tetraspanin 6 [Source:HGNC Symbol;Acc:HGNC:11858]	chrX	100627108	100639991	-1	q22.1	TSPAN6	40.4	protein_coding	4536
0.0085785	0.804	1.716	1.157	1562321_at	ENSG00000004799	pyruvate dehydrogenase kinase 4 [Source:HGNC Symbol;Acc:HGNC:8812]	chr7	95583499	95596516	-1	q21.3	PDK4	36.08	protein_coding	4544
0.006646	0.804	0.6	1.409	220051_at	ENSG00000007038	serine protease 21 [Source:HGNC Symbol;Acc:HGNC:9485]	chr16	2817180	2826304	1	p13.3	PRSS21	55.65	protein_coding	1967
0.0004075	0.804	3.159	0.837	227654_at	ENSG00000042062	RIPOR family member 3 [Source:HGNC Symbol;Acc:HGNC:16168]	chr20	50586108	50691542	-1	q13.13	RIPOR3	51.6	protein_coding	6023
0.0081588	0.804	2.141	0.936	213933_at	ENSG00000050628	prostaglandin E receptor 3 [Source:HGNC Symbol;Acc:HGNC:9595]	chr1	70852353	71047808	-1	p31.1	PTGER3	38.05	protein_coding	9653
0.0024602	0.804	2.116	0.997	210375_at	ENSG00000050628	prostaglandin E receptor 3 [Source:HGNC Symbol;Acc:HGNC:9595]	chr1	70852353	71047808	-1	p31.1	PTGER3	38.05	protein_coding	9653
0.0096877	0.804	0.183	0.518	210036_s_at	ENSG00000055118	potassium voltage-gated channel subfamily H member 2 [Source:HGNC Symbol;Acc:HGNC:6251]	chr7	150944961	150978321	-1	q36.1	KCNH2	59.57	protein_coding	7207
0.0043269	0.804	2.253	0.939	204468_s_at	ENSG00000066056	tyrosine kinase with immunoglobulin like and EGF like domains 1 [Source:HGNC Symbol;Acc:HGNC:11809]	chr1	43300982	43323108	1	p34.2	TIE1	54.59	protein_coding	6705
0.009296	0.804	2.546	0.778	1555832_s_at	ENSG00000067082	Kruppel like factor 6 [Source:HGNC Symbol;Acc:HGNC:2235]	chr10	3775996	3785281	-1	p15.2	KLF6	48.08	protein_coding	6139
0.0087593	0.804	2.575	0.634	214369_s_at	ENSG00000068831	RAS guanyl releasing protein 2 [Source:HGNC Symbol;Acc:HGNC:9879]	chr11	64726911	64745456	-1	q13.1	RASGRP2	55.63	protein_coding	6084
0.0087583	0.804	2.34	0.969	212950_at	ENSG00000069122	adhesion G protein-coupled receptor F5 [Source:HGNC Symbol;Acc:HGNC:19030]	chr6	46852522	46954943	-1	p12.3	ADGRF5	41.65	protein_coding	6601
0.0044827	0.804	3.938	0.646	212951_at	ENSG00000069122	adhesion G protein-coupled receptor F5 [Source:HGNC Symbol;Acc:HGNC:19030]	chr6	46852522	46954943	-1	p12.3	ADGRF5	41.65	protein_coding	6601
0.0071844	0.804	0.178	0.464	211969_at	ENSG00000080824	heat shock protein 90 alpha family class A member 1 [Source:HGNC Symbol;Acc:HGNC:5253]	chr14	102080742	102139699	-1	q32.31	HSP90AA1	47.25	protein_coding	5097
0.0076943	0.804	0.564	1.139	205286_at	ENSG00000087510	transcription factor AP-2 gamma [Source:HGNC Symbol;Acc:HGNC:11744]	chr20	56629306	56639283	1	q13.31	TFAP2C	48.95	protein_coding	3001
0.0029971	0.804	0.114	0.494	212612_at	ENSG00000089902	REST corepressor 1 [Source:HGNC Symbol;Acc:HGNC:17441]	chr14	102592649	102730561	1	q32.31	RCOR1	43.49	protein_coding	6199
0.0062289	0.804	3.225	0.651	226673_at	ENSG00000095370	SH2 domain containing 3C [Source:HGNC Symbol;Acc:HGNC:16884]	chr9	127738317	127778710	-1	q34.11	SH2D3C	53.99	protein_coding	4628
0.0079443	0.804	1.762	1.268	226435_at	ENSG00000100767	papilin, proteoglycan like sulfated glycoprotein [Source:HGNC Symbol;Acc:HGNC:19262]	chr14	73237497	73274640	1	q24.2	PAPLN	55.23	protein_coding	7699
0.0030944	0.804	0.101	0.467	218448_at	ENSG00000101193	GID complex subunit 8 homolog [Source:HGNC Symbol;Acc:HGNC:15857]	chr20	62938147	62948475	1	q13.33	GID8	48.76	protein_coding	4594
0.0097808	0.804	0.234	0.64	203689_s_at	ENSG00000102081	FMRP translational regulator 1 [Source:HGNC Symbol;Acc:HGNC:3775]	chrX	147911919	147951125	1	q27.3	FMR1	36.37	protein_coding	8951
0.0081291	0.804	0.312	0.624	221553_at	ENSG00000102158	magnesium transporter 1 [Source:HGNC Symbol;Acc:HGNC:28880]	chrX	77825747	77895593	-1	q21.1	MAGT1	40.86	protein_coding	5479
0.0088999	0.804	3.243	0.681	227058_at	ENSG00000102802	mesenteric estrogen dependent adipogenesis [Source:HGNC Symbol;Acc:HGNC:25926]	chr13	30906271	30925572	1	q12.3	MEDAG	45.46	protein_coding	2294
0.0086515	0.804	0.213	0.555	204577_s_at	ENSG00000103351	clusterin associated protein 1 [Source:HGNC Symbol;Acc:HGNC:19009]	chr16	3500976	3539048	1	p13.3	CLUAP1	45.57	protein_coding	7746
0.0007144	0.804	0.097	0.542	203584_at	ENSG00000104412	ER membrane protein complex subunit 2 [Source:HGNC Symbol;Acc:HGNC:28963]	chr8	108443601	108489196	1	q23.1	EMC2	34.69	protein_coding	6059
0.0083551	0.804	0.395	0.725	234351_x_at	ENSG00000104447	transcriptional repressor GATA binding 1 [Source:HGNC Symbol;Acc:HGNC:12340]	chr8	115408496	115809673	-1	q23.3	TRPS1	35.81	protein_coding	11046
0.0099695	0.804	0.388	0.835	218502_s_at	ENSG00000104447	transcriptional repressor GATA binding 1 [Source:HGNC Symbol;Acc:HGNC:12340]	chr8	115408496	115809673	-1	q23.3	TRPS1	35.81	protein_coding	11046
0.0003474	0.804	0.101	0.458	203113_s_at	ENSG00000104529	eukaryotic translation elongation factor 1 delta [Source:HGNC Symbol;Acc:HGNC:3211]	chr8	143579697	143599541	-1	q24.3	EEF1D	61.99	protein_coding	9390
0.0074674	0.804	2.57	0.799	223467_at	ENSG00000108551	ras related dexamethasone induced 1 [Source:HGNC Symbol;Acc:HGNC:15828]	chr17	17494437	17496395	-1	p11.2	RASD1	62.89	protein_coding	1748
0.0027152	0.804	0.26	0.557	200923_at	ENSG00000108679	galectin 3 binding protein [Source:HGNC Symbol;Acc:HGNC:6564]	chr17	78971238	78979947	-1	q25.3	LGALS3BP	58.94	protein_coding	3422
0.0006926	0.804	0.101	0.58	203869_at	ENSG00000109189	ubiquitin specific peptidase 46 [Source:HGNC Symbol;Acc:HGNC:20075]	chr4	52590960	52659301	-1	q12	USP46	41.36	protein_coding	8895
0.0030957	0.804	0.241	0.921	231725_at	ENSG00000112852	protocadherin beta 2 [Source:HGNC Symbol;Acc:HGNC:8687]	chr5	141094606	141098703	1	q31.3	PCDHB2	48.32	protein_coding	4098
0.0047051	0.804	5.421	0.475	229164_s_at	ENSG00000114626	ankyrin repeat and BTB domain containing 1 [Source:HGNC Symbol;Acc:HGNC:18275]	chr3	127672935	127680926	1	q21.3	ABTB1	60.37	protein_coding	6155
0.0067099	0.804	3.062	0.618	212980_at	ENSG00000115464	ubiquitin specific peptidase 34 [Source:HGNC Symbol;Acc:HGNC:20066]	chr2	61187463	61471087	-1	p15	USP34	38.8	protein_coding	18443
0.0005559	0.804	0.457	1.481	220979_s_at	ENSG00000117069	ST6 N-acetylgalactosaminide alpha-2,6-sialyltransferase 5 [Source:HGNC Symbol;Acc:HGNC:19342]	chr1	76867480	77067546	1	p31.1	ST6GALNAC5	39.92	protein_coding	6059
0.0039028	0.804	0.254	0.724	201486_at	ENSG00000117906	reticulocalbin 2 [Source:HGNC Symbol;Acc:HGNC:9935]	chr15	76931738	76954393	1	q24.3	RCN2	38.81	protein_coding	9901
0.0016042	0.804	6.39	0.496	209652_s_at	ENSG00000119630	placental growth factor [Source:HGNC Symbol;Acc:HGNC:8893]	chr14	74941834	74955626	-1	q24.3	PGF	55.88	protein_coding	5804
0.0007991	0.804	0.248	0.689	225439_at	ENSG00000120526	NudC domain containing 1 [Source:HGNC Symbol;Acc:HGNC:24306]	chr8	109240919	109334121	-1	q23.1	NUDCD1	36.54	protein_coding	10506
0.0048073	0.804	0.224	0.639	218482_at	ENSG00000120533	ENY2 transcription and export complex 2 subunit [Source:HGNC Symbol;Acc:HGNC:24449]	chr8	109334324	109345954	1	q23.1	ENY2	37.11	protein_coding	6784
0.0027325	0.804	5.323	0.556	205304_s_at	ENSG00000121361	potassium inwardly rectifying channel subfamily J member 8 [Source:HGNC Symbol;Acc:HGNC:6269]	chr12	21764955	21775600	-1	p12.1	KCNJ8	40.64	protein_coding	2511
0.0073633	0.804	3.461	0.637	238534_at	ENSG00000124831	LRR binding FLII interacting protein 1 [Source:HGNC Symbol;Acc:HGNC:6702]	chr2	237627587	237813682	1	q37.3	LRRFIP1	45.52	protein_coding	13218
0.003204	0.804	0.159	0.481	230098_at	ENSG00000129292	PHD finger protein 20 like 1 [Source:HGNC Symbol;Acc:HGNC:24280]	chr8	132775358	132848807	1	q24.22	PHF20L1	34.77	protein_coding	20571
0.0098359	0.804	0.224	0.444	200990_at	ENSG00000130726	tripartite motif containing 28 [Source:HGNC Symbol;Acc:HGNC:16384]	chr19	58544064	58550722	1	q13.43	TRIM28	59.3	protein_coding	4306
0.0031106	0.804	4.083	0.588	205779_at	ENSG00000131477	receptor activity modifying protein 2 [Source:HGNC Symbol;Acc:HGNC:9844]	chr17	42758447	42763041	1	q21.2	RAMP2	55.13	protein_coding	1115
0.0018966	0.804	3.26	0.677	229011_at	ENSG00000134531	epithelial membrane protein 1 [Source:HGNC Symbol;Acc:HGNC:3333]	chr12	13196723	13219941	1	p13.1	EMP1	44.21	protein_coding	7833
0.0046908	0.804	0.389	0.826	204679_at	ENSG00000135750	potassium two pore domain channel subfamily K member 1 [Source:HGNC Symbol;Acc:HGNC:6272]	chr1	233614106	233672514	1	q42.2	KCNK1	42.07	protein_coding	3527
0.0074823	0.804	3.511	0.567	215925_s_at	ENSG00000137101	CD72 molecule [Source:HGNC Symbol;Acc:HGNC:1696]	chr9	35609979	35646810	-1	p13.3	CD72	46.81	protein_coding	2940
0.0062068	0.804	3.905	0.631	1558280_s_at	ENSG00000137962	Rho GTPase activating protein 29 [Source:HGNC Symbol;Acc:HGNC:30207]	chr1	94148988	94275068	-1	p22.1	ARHGAP29	38.07	protein_coding	18370
0.0041973	0.804	1.504	1.693	219140_s_at	ENSG00000138207	retinol binding protein 4 [Source:HGNC Symbol;Acc:HGNC:9922]	chr10	93591687	93601744	-1	q23.33	RBP4	49.28	protein_coding	1458
0.0089806	0.804	3.663	0.532	223422_s_at	ENSG00000138639	Rho GTPase activating protein 24 [Source:HGNC Symbol;Acc:HGNC:25361]	chr4	85475150	86002668	1	q21.23	ARHGAP24	36.75	protein_coding	7870
0.0062967	0.804	0.308	0.732	242579_at	ENSG00000138696	bone morphogenetic protein receptor type 1B [Source:HGNC Symbol;Acc:HGNC:1077]	chr4	94757955	95158448	1	q22.3	BMPR1B	36.7	protein_coding	6561
0.0017668	0.804	0.405	0.94	229975_at	ENSG00000138696	bone morphogenetic protein receptor type 1B [Source:HGNC Symbol;Acc:HGNC:1077]	chr4	94757955	95158448	1	q22.3	BMPR1B	36.7	protein_coding	6561
0.004219	0.804	3.918	0.779	204844_at	ENSG00000138792	glutamyl aminopeptidase [Source:HGNC Symbol;Acc:HGNC:3355]	chr4	110365733	110565285	1	q25	ENPEP	38.57	protein_coding	7720
0.0030524	0.804	4.396	0.688	204845_s_at	ENSG00000138792	glutamyl aminopeptidase [Source:HGNC Symbol;Acc:HGNC:3355]	chr4	110365733	110565285	1	q25	ENPEP	38.57	protein_coding	7720
0.0010336	0.804	5.369	0.624	226950_at	ENSG00000139567	activin A receptor like type 1 [Source:HGNC Symbol;Acc:HGNC:175]	chr12	51906908	51923361	1	q13.13	ACVRL1	54.84	protein_coding	4961
0.0032668	0.804	0.244	0.774	204547_at	ENSG00000141542	RAB40B, member RAS oncogene family [Source:HGNC Symbol;Acc:HGNC:18284]	chr17	82654973	82698698	-1	q25.3	RAB40B	53.01	protein_coding	6164
0.0088838	0.804	1.961	0.988	210770_s_at	ENSG00000141837	calcium voltage-gated channel subunit alpha1 A [Source:HGNC Symbol;Acc:HGNC:1388]	chr19	13206442	13633025	-1	p13.13	CACNA1A	47.43	protein_coding	43150
0.0015546	0.804	0.196	0.662	223821_s_at	ENSG00000143502	sushi domain containing 4 [Source:HGNC Symbol;Acc:HGNC:25470]	chr1	223220819	223364233	-1	q41	SUSD4	44.24	protein_coding	5336
0.001722	0.804	0.256	0.591	223822_at	ENSG00000143502	sushi domain containing 4 [Source:HGNC Symbol;Acc:HGNC:25470]	chr1	223220819	223364233	-1	q41	SUSD4	44.24	protein_coding	5336
0.0054444	0.804	2.212	1.007	228399_at	ENSG00000143867	odd-skipped related transcription factor 1 [Source:HGNC Symbol;Acc:HGNC:8111]	chr2	19351485	19358623	-1	p24.1	OSR1	55.71	protein_coding	5279
0.0069094	0.804	0.263	0.669	208639_x_at	ENSG00000143870	protein disulfide isomerase family A member 6 [Source:HGNC Symbol;Acc:HGNC:30168]	chr2	10783391	10837977	-1	p25.1	PDIA6	46.27	protein_coding	4096
0.0099965	0.804	0.267	0.652	207668_x_at	ENSG00000143870	protein disulfide isomerase family A member 6 [Source:HGNC Symbol;Acc:HGNC:30168]	chr2	10783391	10837977	-1	p25.1	PDIA6	46.27	protein_coding	4096
0.0027927	0.804	2.705	0.761	1557578_at	ENSG00000144824	pleckstrin homology like domain family B member 2 [Source:HGNC Symbol;Acc:HGNC:29573]	chr3	111732497	111976517	1	q13.2	PHLDB2	38.78	protein_coding	12309
0.0057889	0.804	2.836	0.694	205208_at	ENSG00000144908	aldehyde dehydrogenase 1 family member L1 [Source:HGNC Symbol;Acc:HGNC:3978]	chr3	126103562	126197994	-1	q21.3	ALDH1L1	47.42	protein_coding	13712
0.0006802	0.804	5.984	0.633	212793_at	ENSG00000146122	dishevelled associated activator of morphogenesis 2 [Source:HGNC Symbol;Acc:HGNC:18143]	chr6	39792298	39904877	1	p21.2	DAAM2	47.6	protein_coding	12955
0.0033365	0.804	0.263	0.559	205089_at	ENSG00000147789	zinc finger protein 7 [Source:HGNC Symbol;Acc:HGNC:13139]	chr8	144827518	144847509	1	q24.3	ZNF7	50.86	protein_coding	10242
0.0015439	0.804	6.32	0.49	1564525_at	ENSG00000148180	gelsolin [Source:HGNC Symbol;Acc:HGNC:4620]	chr9	121207794	121332843	1	q33.2	GSN	46.87	protein_coding	11018
0.001686	0.804	2.85	0.861	220301_at	ENSG00000150636	coiled-coil domain containing 102B [Source:HGNC Symbol;Acc:HGNC:26295]	chr18	68715209	69055189	1	q22.1	CCDC102B	35.05	protein_coding	5805
0.0015378	0.804	2.532	0.913	235408_x_at	ENSG00000152926	zinc finger protein 117 [Source:HGNC Symbol;Acc:HGNC:12897]	chr7	64971772	65006684	-1	q11.21	ZNF117	39.13	protein_coding	10695
0.0042821	0.804	2.354	0.778	235564_at	ENSG00000152926	zinc finger protein 117 [Source:HGNC Symbol;Acc:HGNC:12897]	chr7	64971772	65006684	-1	q11.21	ZNF117	39.13	protein_coding	10695
0.0063642	0.804	2.866	0.704	207605_x_at	ENSG00000152926	zinc finger protein 117 [Source:HGNC Symbol;Acc:HGNC:12897]	chr7	64971772	65006684	-1	q11.21	ZNF117	39.13	protein_coding	10695
0.0013056	0.804	0.114	0.544	213246_at	ENSG00000153485	transmembrane protein 251 [Source:HGNC Symbol;Acc:HGNC:20218]	chr14	93184951	93188463	1	q32.12	TMEM251	46.14	protein_coding	2455
0.0050029	0.804	0.36	0.712	201772_at	ENSG00000155096	antizyme inhibitor 1 [Source:HGNC Symbol;Acc:HGNC:16432]	chr8	102826111	102893864	-1	q22.3	AZIN1	40.79	protein_coding	6130
0.000894	0.804	0.187	0.605	219060_at	ENSG00000156795	N-terminal glutamine amidase 1 [Source:HGNC Symbol;Acc:HGNC:25490]	chr8	123416726	123470028	1	q24.13	NTAQ1	44.83	protein_coding	4929
0.0061604	0.804	0.56	1.05	202145_at	ENSG00000160932	lymphocyte antigen 6 family member E [Source:HGNC Symbol;Acc:HGNC:6727]	chr8	143017982	143023832	1	q24.3	LY6E	63.58	protein_coding	2638
0.0014417	0.804	0.147	0.43	218679_s_at	ENSG00000160948	VPS28 subunit of ESCRT-I [Source:HGNC Symbol;Acc:HGNC:18178]	chr8	144423601	144428563	-1	q24.3	VPS28	63.23	protein_coding	3769
0.0049169	0.804	0.47	0.942	225203_at	ENSG00000160972	protein phosphatase 1 regulatory subunit 16A [Source:HGNC Symbol;Acc:HGNC:14941]	chr8	144477969	144502121	1	q24.3	PPP1R16A	57.4	protein_coding	5414
0.0037767	0.804	0.604	1.753	229290_at	ENSG00000163331	death associated protein like 1 [Source:HGNC Symbol;Acc:HGNC:21490]	chr2	158795317	158862781	1	q24.1	DAPL1	42.96	protein_coding	1325
0.0061923	0.804	2.12	0.942	205475_at	ENSG00000164106	stimulator of chondrogenesis 1 [Source:HGNC Symbol;Acc:HGNC:17036]	chr4	173384701	173406380	-1	q34.1	SCRG1	37.62	protein_coding	5103
0.0012969	0.804	3.694	0.712	235301_at	ENSG00000164659	endosome-lysosome associated apoptosis and autophagy regulator family member 2 [Source:HGNC Symbol;Acc:HGNC:21945]	chr7	86876906	87059654	-1	q21.12	ELAPOR2	37.29	protein_coding	8070
0.0024104	0.804	2.195	1.07	224822_at	ENSG00000164741	DLC1 Rho GTPase activating protein [Source:HGNC Symbol;Acc:HGNC:2897]	chr8	13083361	13604610	-1	p22	DLC1	38.54	protein_coding	12794
0.0008195	0.804	0.074	0.466	200608_s_at	ENSG00000164754	RAD21 cohesin complex component [Source:HGNC Symbol;Acc:HGNC:9811]	chr8	116845934	116874776	-1	q24.11	RAD21	35.95	protein_coding	6103
0.0064335	0.804	0.472	1.082	229553_at	ENSG00000165434	phosphoglucomutase 2 like 1 [Source:HGNC Symbol;Acc:HGNC:20898]	chr11	74330316	74398433	-1	q13.4	PGM2L1	37.45	protein_coding	8782
0.0028122	0.804	0.393	0.84	229256_at	ENSG00000165434	phosphoglucomutase 2 like 1 [Source:HGNC Symbol;Acc:HGNC:20898]	chr11	74330316	74398433	-1	q13.4	PGM2L1	37.45	protein_coding	8782
0.0055319	0.804	2.133	0.921	209685_s_at	ENSG00000166501	protein kinase C beta [Source:HGNC Symbol;Acc:HGNC:9395]	chr16	23835983	24220611	1	p12.2	PRKCB	43.77	protein_coding	11049
0.0065043	0.804	1.735	1.097	207957_s_at	ENSG00000166501	protein kinase C beta [Source:HGNC Symbol;Acc:HGNC:9395]	chr16	23835983	24220611	1	p12.2	PRKCB	43.77	protein_coding	11049
0.0062826	0.804	0.269	0.686	208612_at	ENSG00000167004	protein disulfide isomerase family A member 3 [Source:HGNC Symbol;Acc:HGNC:4606]	chr15	43746410	43773278	1	q15.3	PDIA3	42.99	protein_coding	4221
0.0065581	0.804	0.618	1.396	205778_at	ENSG00000169035	kallikrein related peptidase 7 [Source:HGNC Symbol;Acc:HGNC:6368]	chr19	50976468	50984099	-1	q13.41	KLK7	55.8	protein_coding	2448
0.0083476	0.804	0.189	0.463	200805_at	ENSG00000169223	lectin, mannose binding 2 [Source:HGNC Symbol;Acc:HGNC:16986]	chr5	177331567	177351668	-1	q35.3	LMAN2	50.4	protein_coding	2168
0.0085586	0.804	0.317	0.513	208820_at	ENSG00000169398	protein tyrosine kinase 2 [Source:HGNC Symbol;Acc:HGNC:9611]	chr8	140657900	141002216	-1	q24.3	PTK2	40.07	protein_coding	13742
0.0053544	0.804	0.179	0.481	242571_at	ENSG00000169891	RALBP1 associated Eps domain containing 2 [Source:HGNC Symbol;Acc:HGNC:9963]	chrX	16946658	17153272	1	p22.2	REPS2	40.94	protein_coding	11336
0.0004034	0.804	0.28	0.67	223273_at	ENSG00000170270	GON7 subunit of KEOPS complex [Source:HGNC Symbol;Acc:HGNC:20356]	chr14	93202894	93207065	-1	q32.12	GON7	43.17	protein_coding	1125
0.008213	0.804	0.426	0.834	218049_s_at	ENSG00000172172	mitochondrial ribosomal protein L13 [Source:HGNC Symbol;Acc:HGNC:14278]	chr8	120380761	120445402	-1	q24.12	MRPL13	35.86	protein_coding	4209
0.0059779	0.804	3.631	0.599	226334_s_at	ENSG00000173209	activator of HSP90 ATPase homolog 2, pseudogene [Source:HGNC Symbol;Acc:HGNC:20437]	chr2	61177418	61191203	1	p15	AHSA2P	44.61	transcribed_unitary_pseudogene	9083
0.0090086	0.804	3.197	0.604	205730_s_at	ENSG00000173210	actin binding LIM protein family member 3 [Source:HGNC Symbol;Acc:HGNC:29132]	chr5	149141483	149260542	1	q32	ABLIM3	44.42	protein_coding	7225
0.0064489	0.804	3.964	0.551	233085_s_at	ENSG00000173559	nucleic acid binding protein 1 [Source:HGNC Symbol;Acc:HGNC:26232]	chr2	191678068	191741097	1	q32.3	NABP1	38.45	protein_coding	17426
0.0059299	0.804	1.861	1.083	207092_at	ENSG00000174697	leptin [Source:HGNC Symbol;Acc:HGNC:6553]	chr7	128241278	128257629	1	q32.1	LEP	49.04	protein_coding	3427
0.0030826	0.804	2.11	0.947	206637_at	ENSG00000174944	purinergic receptor P2Y14 [Source:HGNC Symbol;Acc:HGNC:16442]	chr3	151212117	151278542	-1	q25.1	P2RY14	39.33	protein_coding	2890
0.0047614	0.804	2.481	0.877	220122_at	ENSG00000175471	multiple C2 and transmembrane domain containing 1 [Source:HGNC Symbol;Acc:HGNC:26183]	chr5	94703741	95284575	-1	q15	MCTP1	37.29	protein_coding	12089
0.0059955	0.804	0.401	0.795	229666_s_at	ENSG00000176102	cleavage stimulation factor subunit 3 [Source:HGNC Symbol;Acc:HGNC:2485]	chr11	33077188	33162371	-1	p13	CSTF3	37.22	protein_coding	4513
0.0026377	0.804	2.764	0.782	201465_s_at	ENSG00000177606	Jun proto-oncogene, AP-1 transcription factor subunit [Source:HGNC Symbol;Acc:HGNC:6204]	chr1	58776845	58784048	-1	p32.1	JUN	47.04	protein_coding	3624
0.0014667	0.804	6.374	0.491	213281_at	ENSG00000177606	Jun proto-oncogene, AP-1 transcription factor subunit [Source:HGNC Symbol;Acc:HGNC:6204]	chr1	58776845	58784048	-1	p32.1	JUN	47.04	protein_coding	3624
0.0083452	0.804	3.482	0.558	201464_x_at	ENSG00000177606	Jun proto-oncogene, AP-1 transcription factor subunit [Source:HGNC Symbol;Acc:HGNC:6204]	chr1	58776845	58784048	-1	p32.1	JUN	47.04	protein_coding	3624
0.0058435	0.804	0.365	0.623	58696_at	ENSG00000178896	exosome component 4 [Source:HGNC Symbol;Acc:HGNC:18189]	chr8	144078648	144080648	1	q24.3	EXOSC4	58.67	protein_coding	1386
0.0092765	0.804	0.45	0.713	218695_at	ENSG00000178896	exosome component 4 [Source:HGNC Symbol;Acc:HGNC:18189]	chr8	144078648	144080648	1	q24.3	EXOSC4	58.67	protein_coding	1386
0.0071015	0.804	0.4	0.661	209899_s_at	ENSG00000179950	poly(U) binding splicing factor 60 [Source:HGNC Symbol;Acc:HGNC:17042]	chr8	143816344	143829352	-1	q24.3	PUF60	61.8	protein_coding	4917
0.0001953	0.804	0.178	0.724	218187_s_at	ENSG00000182307	chromosome 8 open reading frame 33 [Source:HGNC Symbol;Acc:HGNC:26104]	chr8	145052465	145066685	1	q24.3	C8orf33	46.22	protein_coding	4353
0.0040471	0.804	0.225	0.596	206188_at	ENSG00000183309	zinc finger protein 623 [Source:HGNC Symbol;Acc:HGNC:29084]	chr8	143636019	143656418	1	q24.3	ZNF623	47.93	protein_coding	7140
0.0081653	0.804	0.132	0.52	234725_s_at	ENSG00000185033	semaphorin 4B [Source:HGNC Symbol;Acc:HGNC:10730]	chr15	90160604	90229679	1	q26.1	SEMA4B	50.67	protein_coding	7006
0.0035803	0.804	5.234	0.499	214460_at	ENSG00000185565	limbic system associated membrane protein [Source:HGNC Symbol;Acc:HGNC:6705]	chr3	115802363	117139389	-1	q13.31	LSAMP	37.2	protein_coding	10286
0.0090549	0.804	0.16	0.488	200654_at	ENSG00000185624	prolyl 4-hydroxylase subunit beta [Source:HGNC Symbol;Acc:HGNC:8548]	chr17	81843159	81860856	-1	q25.3	P4HB	55.81	protein_coding	11132
0.003964	0.804	0.162	0.498	213072_at	ENSG00000187954	cysteine and histidine rich 1 [Source:HGNC Symbol;Acc:HGNC:17806]	chr8	144449582	144465667	-1	q24.3	CYHR1	61.95	protein_coding	9787
0.0076074	0.804	2.016	1.009	227419_x_at	ENSG00000189129	placenta associated 9 [Source:HGNC Symbol;Acc:HGNC:19255]	chr10	80131682	80145359	1	q22.3	PLAC9	50.35	protein_coding	1240
0.009523	0.804	0.221	0.529	219801_at	ENSG00000196378	zinc finger protein 34 [Source:HGNC Symbol;Acc:HGNC:13098]	chr8	144772224	144787345	-1	q24.3	ZNF34	49.13	protein_coding	3110
0.006906	0.804	1.82	1.117	209614_at	ENSG00000196616	alcohol dehydrogenase 1B (class I), beta polypeptide [Source:HGNC Symbol;Acc:HGNC:250]	chr4	99304971	99352760	-1	q23	ADH1B	36.47	protein_coding	10770
0.0021414	0.804	0.166	0.612	228200_at	ENSG00000196922	zinc finger protein 252, pseudogene [Source:HGNC Symbol;Acc:HGNC:13046]	chr8	144973589	145002895	-1	q24.3	ZNF252P	41.65	transcribed_unprocessed_pseudogene	9148
0.0083746	0.804	0.465	0.855	219494_at	ENSG00000197275	RAD54 homolog B [Source:HGNC Symbol;Acc:HGNC:17228]	chr8	94371960	94475115	-1	q22.1	RAD54B	36.72	protein_coding	5319
0.009166	0.804	0.239	0.454	211060_x_at	ENSG00000197858	glycosylphosphatidylinositol anchor attachment 1 [Source:HGNC Symbol;Acc:HGNC:4446]	chr8	144082590	144086216	1	q24.3	GPAA1	64.3	protein_coding	3268
0.0079171	0.804	2.694	0.779	209616_s_at	ENSG00000198848	carboxylesterase 1 [Source:HGNC Symbol;Acc:HGNC:1863]	chr16	55802851	55833337	-1	q12.2	CES1	47.97	protein_coding	2937
0.0021934	0.804	3.296	0.625	1561079_at	ENSG00000206560	ankyrin repeat domain 28 [Source:HGNC Symbol;Acc:HGNC:29024]	chr3	15667236	15859771	-1	p25.1	ANKRD28	37.11	protein_coding	11276
0.0079195	0.804	2.593	0.653	209813_x_at	ENSG00000211695	T cell receptor gamma variable 9 [Source:HGNC Symbol;Acc:HGNC:12295]	chr7	38317017	38318861	-1	p14.1	TRGV9	48.35	TR_V_gene	1735
0.007463	0.804	0.256	0.657	226482_s_at	ENSG00000215845	thiosulfate sulfurtransferase like domain containing 1 [Source:HGNC Symbol;Acc:HGNC:35410]	chr1	161037631	161038977	-1	q23.3	TSTD1	60.06	protein_coding	1197
0.0012541	0.804	2.007	1.202	244885_at	ENSG00000221818	EBF transcription factor 2 [Source:HGNC Symbol;Acc:HGNC:19090]	chr8	25841725	26045413	-1	p21.2	EBF2	42.02	protein_coding	7098
0.0026275	0.804	0.237	0.536	227745_at	ENSG00000245149	RNF139 antisense RNA 1 (head to head) [Source:HGNC Symbol;Acc:HGNC:48940]	chr8	124462485	124474582	-1	q24.13	RNF139-AS1	41.49	lncRNA	6949
0.0083533	0.804	2.28	0.8	1558397_at	ENSG00000261371	platelet and endothelial cell adhesion molecule 1 [Source:HGNC Symbol;Acc:HGNC:8823]	chr17	64319415	64413776	-1	q23.3	PECAM1	47.28	protein_coding	7741
0.0096982	0.804	2.649	0.686	216920_s_at	ENSG00000289746	TCR gamma alternate reading frame protein	chr7	38259643	38273636	-1		TARP		protein_coding

## Sheet: GSE19829 DFS GPL570
Parametric p-value	FDR	Hazard Ratio	SD of log intensities	ProbeSet	Gene_ID	Gene_description	Chromosome_scaffold_name	Gene_start_bp	Gene_end_bp	Strand	Karyotype_band	Gene_name	Gene_GC_content	Gene_type	Gene_Length
0.0082304	1	0.192	0.504	212782_x_at	ENSG00000005075	RNA polymerase II subunit J [Source:HGNC Symbol;Acc:HGNC:9197]	chr7	102473118	102478907	-1	q22.1	POLR2J	55.04	protein_coding	1355
0.0021204	1	4.224	0.589	241669_x_at	ENSG00000105287	protein kinase D2 [Source:HGNC Symbol;Acc:HGNC:17293]	chr19	46674275	46717127	-1	q13.32	PRKD2	51.95	protein_coding	5664
0.0074526	1	0.117	0.382	202591_s_at	ENSG00000106028	single stranded DNA binding protein 1 [Source:HGNC Symbol;Acc:HGNC:11317]	chr7	141738334	141787922	1	q34	SSBP1	40.78	protein_coding	4975
0.0096347	1	0.281	0.688	223821_s_at	ENSG00000143502	sushi domain containing 4 [Source:HGNC Symbol;Acc:HGNC:25470]	chr1	223220819	223364233	-1	q41	SUSD4	44.24	protein_coding	5336
0.0074832	1	0.112	0.489	207564_x_at	ENSG00000147162	O-linked N-acetylglucosamine (GlcNAc) transferase [Source:HGNC Symbol;Acc:HGNC:8127]	chrX	71533104	71575892	1	q13.1	OGT	40.58	protein_coding	9786
0.0098679	1	0.397	0.987	203780_at	ENSG00000149573	myelin protein zero like 2 [Source:HGNC Symbol;Acc:HGNC:3496]	chr11	118253416	118264536	-1	q23.3	MPZL2	38.82	protein_coding	4740
0.0039858	1	5.692	0.525	202464_s_at	ENSG00000170525	6-phosphofructo-2-kinase/fructose-2,6-biphosphatase 3 [Source:HGNC Symbol;Acc:HGNC:8874]	chr10	6144934	6254644	1	p15.1	PFKFB3	50.91	protein_coding	6114
0.0070394	1	3.577	0.858	201465_s_at	ENSG00000177606	Jun proto-oncogene, AP-1 transcription factor subunit [Source:HGNC Symbol;Acc:HGNC:6204]	chr1	58776845	58784048	-1	p32.1	JUN	47.04	protein_coding	3624
0.0080578	1	0.11	0.495	227094_at	ENSG00000181192	dehydrogenase E1 and transketolase domain containing 1 [Source:HGNC Symbol;Acc:HGNC:23537]	chr10	12068954	12123221	1	p14	DHTKD1	46.22	protein_coding	5295
0.0034493	1	0.12	0.49	1555882_at	ENSG00000204271	spindlin family member 3 [Source:HGNC Symbol;Acc:HGNC:27272]	chrX	56818298	56995827	-1	p11.21	SPIN3	39.64	protein_coding	15841

## Sheet: GSE19829 OS GPL8300
Parametric p-value	FDR	Hazard Ratio	SD of log intensities	ProbeSet	Gene_ID	Gene_description	Chromosome_scaffold_name	Gene_start_bp	Gene_end_bp	Strand	Karyotype_band	Gene_name	Gene_GC_content	Gene_type	Gene_Length
0.0037376	0.363	1.659	1.142	33499_s_at	ENSG00000211895	Immunoglobulin heavy constant alpha 1	chr14	105703995	105708665	-1		IGHA1		IG_C_gene
0.009454	0.458	2.492	0.591	41338_at	ENSG00000104964	TLE family member 5, transcriptional modulator [Source:HGNC Symbol;Acc:HGNC:307]	chr19	3052910	3063107	-1	p13.3	TLE5	60.37	protein_coding	5236
0.0010019	0.363	2.48	0.69	37011_at	ENSG00000204472	allograft inflammatory factor 1 [Source:HGNC Symbol;Acc:HGNC:352]	chr6	31615217	31617021	1	p21.33	AIF1	53.91	protein_coding	1243
0.0050361	0.376	2.647	0.674	37099_at	ENSG00000132965	arachidonate 5-lipoxygenase activating protein [Source:HGNC Symbol;Acc:HGNC:436]	chr13	30713478	30764426	1	q12.3	ALOX5AP	45.66	protein_coding	1680
0.0013338	0.363	2.438	0.877	38796_at	ENSG00000173369	complement C1q B chain [Source:HGNC Symbol;Acc:HGNC:1242]	chr1	22652762	22661637	1	p36.12	C1QB	51.05	protein_coding	1492
0.0041008	0.363	2.026	0.813	40095_at	ENSG00000104267	carbonic anhydrase 2 [Source:HGNC Symbol;Acc:HGNC:1373]	chr8	85463968	85481493	1	q21.2	CA2	38.44	protein_coding	2007
0.002425	0.363	3.324	0.587	36661_s_at	ENSG00000170458	CD14 molecule [Source:HGNC Symbol;Acc:HGNC:1628]	chr5	140631728	140633701	-1	q31.3	CD14	58.26	protein_coding	1648
0.0093641	0.458	2.42	0.59	38006_at	ENSG00000117091	CD48 molecule [Source:HGNC Symbol;Acc:HGNC:1683]	chr1	160678746	160711831	-1	q23.3	CD48	42.19	protein_coding	3254
0.0080192	0.418	2.373	0.618	38378_at	ENSG00000143119	CD53 molecule [Source:HGNC Symbol;Acc:HGNC:1686]	chr1	110871188	110899922	1	p13.3	CD53	39.53	protein_coding	2152
0.0040448	0.363	1.938	0.785	34210_at	ENSG00000169442	CD52 molecule [Source:HGNC Symbol;Acc:HGNC:1804]	chr1	26317958	26320523	1	p36.11	CD52	54.56	protein_coding	934
0.0034842	0.363	0.413	0.852	41783_at	ENSG00000143320	cellular retinoic acid binding protein 2 [Source:HGNC Symbol;Acc:HGNC:2339]	chr1	156699606	156705816	-1	q23.1	CRABP2	55.42	protein_coding	1082
0.0064068	0.385	0.578	1.044	1057_at	ENSG00000143320	cellular retinoic acid binding protein 2 [Source:HGNC Symbol;Acc:HGNC:2339]	chr1	156699606	156705816	-1	q23.1	CRABP2	55.42	protein_coding	1082
0.0042737	0.363	2.004	0.763	39581_at	ENSG00000121552	cystatin A [Source:HGNC Symbol;Acc:HGNC:2481]	chr3	122325248	122341969	1	q21.1	CSTA	41.8	protein_coding	1366
0.0023207	0.363	3.6	0.439	41225_at	ENSG00000108861	dual specificity phosphatase 3 [Source:HGNC Symbol;Acc:HGNC:3069]	chr17	43766125	43778977	-1	q21.31	DUSP3	50.9	protein_coding	4997
0.0057745	0.382	0.282	0.508	2088_s_at	ENSG00000133216	EPH receptor B2 [Source:HGNC Symbol;Acc:HGNC:3393]	chr1	22710839	22921500	1	p36.12	EPHB2	51.95	protein_coding	12516
0.004567	0.369	1.875	0.886	40019_at	ENSG00000185862	ecotropic viral integration site 2B [Source:HGNC Symbol;Acc:HGNC:3500]	chr17	31303770	31314105	-1	q11.2	EVI2B	37.11	protein_coding	2061
0.0003213	0.276	2.538	0.804	38052_at	ENSG00000124491	coagulation factor XIII A chain [Source:HGNC Symbol;Acc:HGNC:3531]	chr6	6144084	6321013	-1	p25.1	F13A1	41.74	protein_coding	4554
0.0065264	0.385	1.892	0.776	34311_at	ENSG00000173221	glutaredoxin [Source:HGNC Symbol;Acc:HGNC:4330]	chr5	95751319	95822726	-1	q15	GLRX	41.08	protein_coding	6229
0.0070323	0.398	0.387	0.572	37450_r_at	ENSG00000087460	GNAS complex locus [Source:HGNC Symbol;Acc:HGNC:4392]	chr20	58839718	58911192	1	q13.32	GNAS	47.09	protein_coding	22221
0.0077452	0.413	0.368	0.557	37449_i_at	ENSG00000087460	GNAS complex locus [Source:HGNC Symbol;Acc:HGNC:4392]	chr20	58839718	58911192	1	q13.32	GNAS	47.09	protein_coding	22221
0.008432	0.431	2.55	0.568	33308_at	ENSG00000169919	glucuronidase beta [Source:HGNC Symbol;Acc:HGNC:4696]	chr7	65960684	65982215	-1	q11.21	GUSB	51.96	protein_coding	3893
0.0010862	0.363	3.576	0.502	1062_g_at	ENSG00000110324	interleukin 10 receptor subunit alpha [Source:HGNC Symbol;Acc:HGNC:5964]	chr11	117986370	118003037	1	q23.3	IL10RA	49.19	protein_coding	8080
0.0046991	0.369	2.156	0.769	37023_at	ENSG00000136167	lymphocyte cytosolic protein 1 [Source:HGNC Symbol;Acc:HGNC:6528]	chr13	46125920	46211871	-1	q14.13	LCP1	40.21	protein_coding	5076
0.0091945	0.458	2.914	0.473	39319_at	ENSG00000043462	lymphocyte cytosolic protein 2 [Source:HGNC Symbol;Acc:HGNC:6529]	chr5	170246233	170297815	-1	q35.1	LCP2	44.62	protein_coding	6823
0.0030876	0.363	0.184	0.505	981_at	ENSG00000104738	minichromosome maintenance complex component 4 [Source:HGNC Symbol;Acc:HGNC:6947]	chr8	47960185	47978160	1	q11.21	MCM4	45.8	protein_coding	6973
0.0098926	0.471	2.283	0.629	1327_s_at	ENSG00000197442	mitogen-activated protein kinase kinase kinase 5 [Source:HGNC Symbol;Acc:HGNC:6857]	chr6	136557046	136792477	-1	q23.3	MAP3K5	39.89	protein_coding	5263
0.0043327	0.363	2.427	0.794	34403_at	ENSG00000140545	milk fat globule EGF and factor V/VIII domain containing [Source:HGNC Symbol;Acc:HGNC:7036]	chr15	88898683	88913381	-1	q26.1	MFGE8	55.57	protein_coding	6807
0.0023651	0.363	2.975	0.574	38228_g_at	ENSG00000187098	melanocyte inducing transcription factor [Source:HGNC Symbol;Acc:HGNC:7105]	chr3	69739464	69968336	1	p13	MITF	38.56	protein_coding	7151
0.0060937	0.382	3.245	0.566	38695_at	ENSG00000164258	NADH:ubiquinone oxidoreductase subunit S4 [Source:HGNC Symbol;Acc:HGNC:7711]	chr5	53560633	53683338	1	q11.2	NDUFS4	36.57	protein_coding	1174
0.0030862	0.363	2.314	0.728	32724_at	ENSG00000107537	phytanoyl-CoA 2-hydroxylase [Source:HGNC Symbol;Acc:HGNC:8940]	chr10	13277796	13302412	-1	p13	PHYH	46.07	protein_coding	3377
0.0024649	0.363	1.75	1.12	41469_at	ENSG00000124102	peptidase inhibitor 3 [Source:HGNC Symbol;Acc:HGNC:8947]	chr20	45174902	45176544	1	q13.12	PI3	51.43	protein_coding	551
0.0033798	0.363	0.272	0.448	1696_at	ENSG00000070501	DNA polymerase beta [Source:HGNC Symbol;Acc:HGNC:9174]	chr8	42338454	42371808	1	p11.21	POLB	40.44	protein_coding	4106
0.0077767	0.413	3.362	0.526	37422_at	ENSG00000168938	peptidylprolyl isomerase C [Source:HGNC Symbol;Acc:HGNC:9256]	chr5	123023250	123036725	-1	q23.2	PPIC	44.38	protein_coding	2082
0.0060668	0.382	0.249	0.489	36857_at	ENSG00000113456	RAD1 checkpoint DNA exonuclease [Source:HGNC Symbol;Acc:HGNC:9806]	chr5	34905260	34918989	-1	p13.2	RAD1	40.31	protein_coding	6770
0.0028451	0.363	3.295	0.556	32597_at	ENSG00000103479	RB transcriptional corepressor like 2 [Source:HGNC Symbol;Acc:HGNC:9894]	chr16	53433977	53491648	1	q12.2	RBL2	38.71	protein_coding	8110
0.0003997	0.276	6.96	0.449	41741_at	ENSG00000102317	RNA binding motif protein 3 [Source:HGNC Symbol;Acc:HGNC:9900]	chrX	48574449	48581162	1	p11.23	RBM3	47.57	protein_coding	5827
0.0060344	0.382	2.541	0.564	34660_at	ENSG00000169413	ribonuclease A family member k6 [Source:HGNC Symbol;Acc:HGNC:10048]	chr14	20781268	20782467	1	q11.2	RNASE6	42.58	protein_coding	844
0.0023495	0.363	2.307	0.742	33337_at	ENSG00000143753	delta 4-desaturase, sphingolipid 1 [Source:HGNC Symbol;Acc:HGNC:13709]	chr1	224175756	224193441	1	q42.11	DEGS1	46.06	protein_coding	2446
0.0060834	0.382	2.42	0.703	31438_s_at	ENSG00000177575	CD163 molecule [Source:HGNC Symbol;Acc:HGNC:1631]	chr12	7470811	7503893	-1	p13.31	CD163	37.42	protein_coding	5815
0.0036185	0.363	2.901	0.704	37025_at	ENSG00000189067	lipopolysaccharide induced TNF factor [Source:HGNC Symbol;Acc:HGNC:16841]	chr16	11547722	11636381	-1	p13.13	LITAF	49.14	protein_coding	5058
0.0073094	0.404	2.048	0.813	32193_at	ENSG00000136040	plexin C1 [Source:HGNC Symbol;Acc:HGNC:9106]	chr12	94148577	94307675	1	q22	PLXNC1	43.77	protein_coding	10033
0.0065494	0.385	3.275	0.552	37542_at	ENSG00000145685	LHFPL tetraspan subfamily member 2 [Source:HGNC Symbol;Acc:HGNC:6588]	chr5	78485215	78770021	-1	q14.1	LHFPL2	43.31	protein_coding	7977
0.0019799	0.363	2.755	0.763	31508_at	ENSG00000265972	thioredoxin interacting protein [Source:HGNC Symbol;Acc:HGNC:16952]	chr1	145992435	145996579	-1	q21.1	TXNIP	42.39	protein_coding	3604
0.0055377	0.382	3.553	0.488	34657_at	ENSG00000023516	A-kinase anchoring protein 11 [Source:HGNC Symbol;Acc:HGNC:369]	chr13	42272152	42323261	1	q14.11	AKAP11	36.45	protein_coding	9915
0.0014314	0.363	3.328	0.545	37684_at	ENSG00000137491	solute carrier organic anion transporter family member 2B1 [Source:HGNC Symbol;Acc:HGNC:10962]	chr11	75100563	75206549	1	q13.4	SLCO2B1	47.99	protein_coding	10277
0.001009	0.363	0.346	0.564	36145_at	ENSG00000179950	poly(U) binding splicing factor 60 [Source:HGNC Symbol;Acc:HGNC:17042]	chr8	143816344	143829352	-1	q24.3	PUF60	61.8	protein_coding	4917
0.0025964	0.363	3.003	0.583	41385_at	ENSG00000082397	erythrocyte membrane protein band 4.1 like 3 [Source:HGNC Symbol;Acc:HGNC:3380]	chr18	5392381	5630700	-1	p11.31	EPB41L3	39.83	protein_coding	12203
0.0003664	0.276	4.33	0.495	33956_at	ENSG00000154589	lymphocyte antigen 96 [Source:HGNC Symbol;Acc:HGNC:17156]	chr8	73991392	74029079	1	q21.11	LY96	42	protein_coding	559
0.0035022	0.363	0.278	0.561	41691_at	ENSG00000163960	UBX domain protein 7 [Source:HGNC Symbol;Acc:HGNC:29119]	chr3	196347662	196432430	-1	q29	UBXN7	42.27	protein_coding	11247
0.0048085	0.369	4.538	0.422	39150_at	ENSG00000123091	ring finger protein 11 [Source:HGNC Symbol;Acc:HGNC:10056]	chr1	51236273	51273447	1	p32.3	RNF11	41.24	protein_coding	3112
0.000884	0.363	0.211	0.665	41356_at	ENSG00000119866	BAF chromatin remodeling complex subunit BCL11A [Source:HGNC Symbol;Acc:HGNC:13221]	chr2	60450520	60554467	-1	p16.1	BCL11A	44.77	protein_coding	24514
0.0016116	0.363	0.349	0.753	41355_at	ENSG00000119866	BAF chromatin remodeling complex subunit BCL11A [Source:HGNC Symbol;Acc:HGNC:13221]	chr2	60450520	60554467	-1	p16.1	BCL11A	44.77	protein_coding	24514
0.0001392	0.276	2.088	0.951	38323_at	ENSG00000106066	carboxypeptidase vitellogenic like [Source:HGNC Symbol;Acc:HGNC:14399]	chr7	28995235	29195451	-1	p14.3	CPVL	41	protein_coding	3336
0.003125	0.363	3.629	0.584	39692_at	ENSG00000182158	cAMP responsive element binding protein 3 like 2 [Source:HGNC Symbol;Acc:HGNC:23720]	chr7	137874979	138002086	-1	q33	CREB3L2	43.66	protein_coding	8807

## Sheet: GSE19829 DFS GPL8300
Parametric p-value	FDR	Hazard Ratio	SD of log intensities	ProbeSet	Gene_ID	Gene_description	Chromosome_scaffold_name	Gene_start_bp	Gene_end_bp	Strand	Karyotype_band	Gene_name	Gene_GC_content	Gene_type	Gene_Length
0.0035223	0.222	2.582	0.807	38363_at	ENSG00000011600	transmembrane immune signaling adaptor TYROBP [Source:HGNC Symbol;Acc:HGNC:12449]	chr19	35904401	35908295	-1	q13.12	TYROBP	51.45	protein_coding	907
0.0037282	0.222	4.092	0.473	33865_at	ENSG00000015171	zinc finger MYND-type containing 11 [Source:HGNC Symbol;Acc:HGNC:16966]	chr10	134465	254637	1	p15.3	ZMYND11	37.8	protein_coding	5325
0.000123	0.103	6.379	0.484	34657_at	ENSG00000023516	A-kinase anchoring protein 11 [Source:HGNC Symbol;Acc:HGNC:369]	chr13	42272152	42323261	1	q14.11	AKAP11	36.45	protein_coding	9915
0.0001159	0.103	5.329	0.501	39319_at	ENSG00000043462	lymphocyte cytosolic protein 2 [Source:HGNC Symbol;Acc:HGNC:6529]	chr5	170246233	170297815	-1	q35.1	LCP2	44.62	protein_coding	6823
0.0035983	0.222	2.248	0.816	39175_at	ENSG00000067057	phosphofructokinase, platelet [Source:HGNC Symbol;Acc:HGNC:8878]	chr10	3066333	3137718	1	p15.2	PFKP	51.45	protein_coding	7728
0.0010919	0.161	2.258	0.831	40518_at	ENSG00000081237	protein tyrosine phosphatase receptor type C [Source:HGNC Symbol;Acc:HGNC:9666]	chr1	198638457	198757476	1	q31.3	PTPRC	34.25	protein_coding	9168
0.0060212	0.292	4.344	0.402	317_at	ENSG00000100600	legumain [Source:HGNC Symbol;Acc:HGNC:9472]	chr14	92703807	92748679	-1	q32.12	LGMN	47.28	protein_coding	3876
0.001747	0.174	2.521	0.68	31870_at	ENSG00000104894	CD37 molecule [Source:HGNC Symbol;Acc:HGNC:1666]	chr19	49335171	49343335	1	q13.33	CD37	57.54	protein_coding	4161
0.0019554	0.174	1.813	0.988	38323_at	ENSG00000106066	carboxypeptidase vitellogenic like [Source:HGNC Symbol;Acc:HGNC:14399]	chr7	28995235	29195451	-1	p14.3	CPVL	41	protein_coding	3336
0.0023825	0.199	2.148	0.874	38406_f_at	ENSG00000107317	prostaglandin D2 synthase [Source:HGNC Symbol;Acc:HGNC:9592]	chr9	136975092	136981742	1	q34.3	PTGDS	66.35	protein_coding	2712
0.0027168	0.214	2.079	0.919	216_at	ENSG00000107317	prostaglandin D2 synthase [Source:HGNC Symbol;Acc:HGNC:9592]	chr9	136975092	136981742	1	q34.3	PTGDS	66.35	protein_coding	2712
0.003214	0.222	1.719	1.112	38407_r_at	ENSG00000107317	prostaglandin D2 synthase [Source:HGNC Symbol;Acc:HGNC:9592]	chr9	136975092	136981742	1	q34.3	PTGDS	66.35	protein_coding	2712
0.005528	0.273	2.413	0.712	34839_at	ENSG00000107959	pitrilysin metallopeptidase 1 [Source:HGNC Symbol;Acc:HGNC:17663]	chr10	3137728	3172841	-1	p15.2	PITRM1	46.17	protein_coding	12635
7.64e-05	0.103	5.726	0.512	1062_g_at	ENSG00000110324	interleukin 10 receptor subunit alpha [Source:HGNC Symbol;Acc:HGNC:5964]	chr11	117986370	118003037	1	q23.3	IL10RA	49.19	protein_coding	8080
0.0037722	0.222	2	0.828	36239_at	ENSG00000110777	POU class 2 homeobox associating factor 1 [Source:HGNC Symbol;Acc:HGNC:9211]	chr11	111352255	111455630	-1	q23.1	POU2AF1	45.99	protein_coding	6996
0.0098766	0.37	3.054	0.562	37645_at	ENSG00000110848	CD69 molecule [Source:HGNC Symbol;Acc:HGNC:1694]	chr12	9752486	9760901	-1	p13.31	CD69	35.34	protein_coding	2832
0.008977	0.354	2.152	0.66	36280_at	ENSG00000113088	granzyme K [Source:HGNC Symbol;Acc:HGNC:4711]	chr5	55024256	55034570	1	q11.2	GZMK	40.28	protein_coding	1567
0.0099193	0.37	3.201	0.481	706_at	ENSG00000113580	nuclear receptor subfamily 3 group C member 1 [Source:HGNC Symbol;Acc:HGNC:7978]	chr5	143277931	143435512	-1	q31.3	NR3C1	37.82	protein_coding	9161
0.0009184	0.149	3.499	0.567	38006_at	ENSG00000117091	CD48 molecule [Source:HGNC Symbol;Acc:HGNC:1683]	chr1	160678746	160711831	-1	q23.3	CD48	42.19	protein_coding	3254
0.0074355	0.321	3.133	0.508	40585_at	ENSG00000121281	adenylate cyclase 7 [Source:HGNC Symbol;Acc:HGNC:238]	chr16	50246137	50318135	1	q12.1	ADCY7	54.43	protein_coding	8595
0.0051659	0.26	1.852	0.834	32227_at	ENSG00000122862	serglycin [Source:HGNC Symbol;Acc:HGNC:9361]	chr10	69088103	69104805	1	q22.1	SRGN	42.48	protein_coding	1217
0.0035784	0.222	2.339	0.823	41743_i_at	ENSG00000123240	optineurin [Source:HGNC Symbol;Acc:HGNC:17142]	chr10	13099449	13138308	1	p13	OPTN	42.4	protein_coding	5138
0.0082811	0.341	2.258	0.797	41742_s_at	ENSG00000123240	optineurin [Source:HGNC Symbol;Acc:HGNC:17142]	chr10	13099449	13138308	1	p13	OPTN	42.4	protein_coding	5138
0.0033203	0.222	2.781	0.678	41744_at	ENSG00000123240	optineurin [Source:HGNC Symbol;Acc:HGNC:17142]	chr10	13099449	13138308	1	p13	OPTN	42.4	protein_coding	5138
0.0016702	0.174	1.86	1.167	41469_at	ENSG00000124102	peptidase inhibitor 3 [Source:HGNC Symbol;Acc:HGNC:8947]	chr20	45174902	45176544	1	q13.12	PI3	51.43	protein_coding	551
0.000534	0.125	2.459	0.825	38052_at	ENSG00000124491	coagulation factor XIII A chain [Source:HGNC Symbol;Acc:HGNC:3531]	chr6	6144084	6321013	-1	p25.1	F13A1	41.74	protein_coding	4554
0.0022178	0.191	3.166	0.532	1879_at	ENSG00000126458	RAS related [Source:HGNC Symbol;Acc:HGNC:10447]	chr19	49635292	49640143	-1	q13.33	RRAS	59.05	protein_coding	1102
0.0070228	0.308	3.087	0.535	36825_at	ENSG00000132274	tripartite motif containing 22 [Source:HGNC Symbol;Acc:HGNC:16379]	chr11	5689697	5737089	1	p15.4	TRIM22	38.58	protein_coding	5944
0.0004393	0.125	1.875	1.317	37006_at	ENSG00000132465	joining chain of multimeric IgA and IgM [Source:HGNC Symbol;Acc:HGNC:5713]	chr4	70655541	70681817	-1	q13.3	JCHAIN	37.02	protein_coding	1546
0.0008914	0.149	3.442	0.659	37099_at	ENSG00000132965	arachidonate 5-lipoxygenase activating protein [Source:HGNC Symbol;Acc:HGNC:436]	chr13	30713478	30764426	1	q12.3	ALOX5AP	45.66	protein_coding	1680
0.0063857	0.294	0.374	0.498	2088_s_at	ENSG00000133216	EPH receptor B2 [Source:HGNC Symbol;Acc:HGNC:3393]	chr1	22710839	22921500	1	p36.12	EPHB2	51.95	protein_coding	12516
0.0011938	0.165	2.554	0.773	37023_at	ENSG00000136167	lymphocyte cytosolic protein 1 [Source:HGNC Symbol;Acc:HGNC:6528]	chr13	46125920	46211871	-1	q14.13	LCP1	40.21	protein_coding	5076
0.0005709	0.125	4.043	0.543	37684_at	ENSG00000137491	solute carrier organic anion transporter family member 2B1 [Source:HGNC Symbol;Acc:HGNC:10962]	chr11	75100563	75206549	1	q13.4	SLCO2B1	47.99	protein_coding	10277
0.0014484	0.174	3.983	0.599	2044_s_at	ENSG00000139687	RB transcriptional corepressor 1 [Source:HGNC Symbol;Acc:HGNC:9884]	chr13	48303744	48599436	1	q14.2	RB1	38.5	protein_coding	6434
0.0001583	0.103	3.966	0.618	38378_at	ENSG00000143119	CD53 molecule [Source:HGNC Symbol;Acc:HGNC:1686]	chr1	110871188	110899922	1	p13.3	CD53	39.53	protein_coding	2152
0.0046272	0.251	2.344	0.814	37688_f_at	ENSG00000143226	Fc fragment of IgG receptor IIa [Source:HGNC Symbol;Acc:HGNC:3616]	chr1	161505430	161524013	1	q23.3	FCGR2A	43.82	protein_coding	5422
0.0062307	0.292	2.835	0.557	37542_at	ENSG00000145685	LHFPL tetraspan subfamily member 2 [Source:HGNC Symbol;Acc:HGNC:6588]	chr5	78485215	78770021	-1	q14.1	LHFPL2	43.31	protein_coding	7977
0.0017043	0.174	4.317	0.482	33956_at	ENSG00000154589	lymphocyte antigen 96 [Source:HGNC Symbol;Acc:HGNC:17156]	chr8	73991392	74029079	1	q21.11	LY96	42	protein_coding	559
0.0024456	0.199	2.448	0.698	36889_at	ENSG00000158869	Fc fragment of IgE receptor Ig [Source:HGNC Symbol;Acc:HGNC:3611]	chr1	161215234	161220699	1	q23.3	FCER1G	49.29	protein_coding	964
0.0051872	0.26	3.57	0.496	37918_at	ENSG00000160255	integrin subunit beta 2 [Source:HGNC Symbol;Acc:HGNC:6155]	chr21	44885953	44931989	-1	q22.3	ITGB2	57.45	protein_coding	6869
0.0051366	0.26	2.651	0.687	37759_at	ENSG00000162511	lysosomal protein transmembrane 5 [Source:HGNC Symbol;Acc:HGNC:29612]	chr1	30732469	30757774	-1	p35.2	LAPTM5	52.6	protein_coding	3228
0.0084402	0.343	2.178	0.727	35012_at	ENSG00000163563	myeloid cell nuclear differentiation antigen [Source:HGNC Symbol;Acc:HGNC:7183]	chr1	158831351	158849506	1	q23.1	MNDA	34.66	protein_coding	2025
0.0037224	0.222	2.84	0.55	37975_at	ENSG00000165168	cytochrome b-245 beta chain [Source:HGNC Symbol;Acc:HGNC:2578]	chrX	37780059	37813461	1	p21.1	CYBB	37.33	protein_coding	4375
0.0027966	0.214	1.948	0.889	39317_at	ENSG00000168405	cytidine monophospho-N-acetylneuraminic acid hydroxylase, pseudogene [Source:HGNC Symbol;Acc:HGNC:2098]	chr6	25061626	25452263	-1	p22.2	CMAHP	40.14	transcribed_unitary_pseudogene	8477
0.0015319	0.174	3.575	0.548	34660_at	ENSG00000169413	ribonuclease A family member k6 [Source:HGNC Symbol;Acc:HGNC:10048]	chr14	20781268	20782467	1	q11.2	RNASE6	42.58	protein_coding	844
0.0019563	0.174	2.24	0.799	34210_at	ENSG00000169442	CD52 molecule [Source:HGNC Symbol;Acc:HGNC:1804]	chr1	26317958	26320523	1	p36.11	CD52	54.56	protein_coding	934
0.0005905	0.125	3.408	0.594	36661_s_at	ENSG00000170458	CD14 molecule [Source:HGNC Symbol;Acc:HGNC:1628]	chr5	140631728	140633701	-1	q31.3	CD14	58.26	protein_coding	1648
0.0005889	0.125	3.84	0.567	34311_at	ENSG00000173221	glutaredoxin [Source:HGNC Symbol;Acc:HGNC:4330]	chr5	95751319	95822726	-1	q15	GLRX	41.08	protein_coding	6229
0.0004738	0.125	2.538	0.83	38796_at	ENSG00000173369	complement C1q B chain [Source:HGNC Symbol;Acc:HGNC:1242]	chr1	22652762	22661637	1	p36.12	C1QB	51.05	protein_coding	1492
0.0008625	0.149	2.633	0.695	31438_s_at	ENSG00000177575	CD163 molecule [Source:HGNC Symbol;Acc:HGNC:1631]	chr12	7470811	7503893	-1	p13.31	CD163	37.42	protein_coding	5815
0.003715	0.222	2.817	0.62	41549_s_at	ENSG00000182287	adaptor related protein complex 1 subunit sigma 2 [Source:HGNC Symbol;Acc:HGNC:560]	chrX	15825806	15854931	-1	p22.2	AP1S2	36.69	protein_coding	5428
0.0066155	0.297	0.571	1.036	35829_at	ENSG00000182985	cell adhesion molecule 1 [Source:HGNC Symbol;Acc:HGNC:5951]	chr11	115169218	115504957	-1	q23.3	CADM1	38.54	protein_coding	10975
0.0011052	0.161	2.302	0.888	40019_at	ENSG00000185862	ecotropic viral integration site 2B [Source:HGNC Symbol;Acc:HGNC:3500]	chr17	31303770	31314105	-1	q11.2	EVI2B	37.11	protein_coding	2061
0.0037794	0.222	3.46	0.459	36753_at	ENSG00000186818	leukocyte immunoglobulin like receptor B4 [Source:HGNC Symbol;Acc:HGNC:6608]	chr19	54643889	54670359	1	q13.42	LILRB4	47.12	protein_coding	6328
0.0077308	0.326	2.385	0.69	38220_at	ENSG00000188641	dihydropyrimidine dehydrogenase [Source:HGNC Symbol;Acc:HGNC:3012]	chr1	97077743	97995000	-1	p21.3	DPYD	35.1	protein_coding	7131
0.0003146	0.125	3.362	0.627	37011_at	ENSG00000204472	allograft inflammatory factor 1 [Source:HGNC Symbol;Acc:HGNC:352]	chr6	31615217	31617021	1	p21.33	AIF1	53.91	protein_coding	1243
0.0013667	0.174	3.684	0.485	33641_g_at	ENSG00000204472	allograft inflammatory factor 1 [Source:HGNC Symbol;Acc:HGNC:352]	chr6	31615217	31617021	1	p21.33	AIF1	53.91	protein_coding	1243
0.0045167	0.249	1.386	2.098	33273_f_at	ENSG00000211675	immunoglobulin lambda constant 1 [Source:HGNC Symbol;Acc:HGNC:5855]	chr22	22895375	22895834	1	q11.22	IGLC1	58.26	IG_C_gene	460
0.0041374	0.233	1.61	1.153	33499_s_at	ENSG00000211895	immunoglobulin heavy constant alpha 1 [Source:HGNC Symbol;Acc:HGNC:5478]	chr14	105703995	105708665	-1	q32.33	IGHA1	60.69	IG_C_gene	1422
0.0007401	0.146	1.915	1.165	34105_f_at	ENSG00000211899	immunoglobulin heavy constant mu [Source:HGNC Symbol;Acc:HGNC:5541]	chr14	105851705	105856218	-1	q32.33	IGHM	61.79	IG_C_gene	1871
0.0078006	0.326	1.537	1.104	41165_g_at	ENSG00000211899	immunoglobulin heavy constant mu [Source:HGNC Symbol;Acc:HGNC:5541]	chr14	105851705	105856218	-1	q32.33	IGHM	61.79	IG_C_gene	1871
0.0088029	0.352	1.393	1.478	41164_at	ENSG00000211899	immunoglobulin heavy constant mu [Source:HGNC Symbol;Acc:HGNC:5541]	chr14	105851705	105856218	-1	q32.33	IGHM	61.79	IG_C_gene	1871
0.0019508	0.174	1.525	1.582	41827_f_at	ENSG00000228315	GUSB pseudogene 11 [Source:HGNC Symbol;Acc:HGNC:42325]	chr22	23638487	23717356	-1	q11.23	GUSBP11	50.35	lncRNA	7764
0.0061859	0.292	2.279	0.669	36103_at	ENSG00000277632	C-C motif chemokine ligand 3 [Source:HGNC Symbol;Acc:HGNC:10627]	chr17	36088256	36090169	-1	q12	CCL3	52.19	protein_coding	1494

## Sheet: GSE26193 OS
Parametric p-value	FDR	Hazard Ratio	SD of log intensities	ProbeSet	Gene_ID	Gene_description	Chromosome_scaffold_name	Gene_start_bp	Gene_end_bp	Strand	Karyotype_band	Gene_name	Gene_GC_content	Gene_type	Gene_Length
0.0029305	0.498	1.294	1.385	229271_x_at	ENSG00000060718	collagen type XI alpha 1 chain [Source:HGNC Symbol;Acc:HGNC:2186]	chr1	102876467	103108872	-1	p21.1	COL11A1	33.18	protein_coding	9091
0.0063748	0.519	1.601	0.726	201996_s_at	ENSG00000065526	spen family transcriptional repressor [Source:HGNC Symbol;Acc:HGNC:17575]	chr1	15836095	15940456	1	p36.21	SPEN	43.57	protein_coding	14336
0.0042542	0.504	1.694	0.664	222236_s_at	ENSG00000088280	ArfGAP with SH3 domain, ankyrin repeat and PH domain 3 [Source:HGNC Symbol;Acc:HGNC:14987]	chr1	23428563	23484568	-1	p36.12	ASAP3	49.67	protein_coding	4988
0.00751	0.519	1.231	1.628	202988_s_at	ENSG00000090104	regulator of G protein signaling 1 [Source:HGNC Symbol;Acc:HGNC:9991]	chr1	192575763	192580024	1	q31.2	RGS1	33.81	protein_coding	4074
0.0084957	0.519	2.055	0.45	220079_s_at	ENSG00000090686	ubiquitin specific peptidase 48 [Source:HGNC Symbol;Acc:HGNC:18533]	chr1	21678298	21783606	-1	p36.12	USP48	41.84	protein_coding	9497
0.00562	0.51	1.302	1.357	202388_at	ENSG00000116741	regulator of G protein signaling 2 [Source:HGNC Symbol;Acc:HGNC:9998]	chr1	192809039	192812275	1	q31.2	RGS2	40.81	protein_coding	2088
0.0081736	0.519	0.644	0.687	222734_at	ENSG00000116874	tryptophanyl tRNA synthetase 2, mitochondrial [Source:HGNC Symbol;Acc:HGNC:12730]	chr1	119031216	119140654	-1	p12	WARS2	38.1	protein_coding	3830
0.0090879	0.519	1.318	1.238	231577_s_at	ENSG00000117228	guanylate binding protein 1 [Source:HGNC Symbol;Acc:HGNC:4182]	chr1	89051882	89065360	-1	p22.2	GBP1	37.94	protein_coding	6103
0.0071998	0.519	1.509	0.871	218700_s_at	ENSG00000117280	RAB29, member RAS oncogene family [Source:HGNC Symbol;Acc:HGNC:9789]	chr1	205767986	205775482	-1	q32.1	RAB29	46.01	protein_coding	3904
0.0046172	0.504	1.638	0.628	214075_at	ENSG00000117691	neudesin neurotrophic factor [Source:HGNC Symbol;Acc:HGNC:30384]	chr1	212432920	212446379	1	q32.3	NENF	47.62	protein_coding	1264
0.00122	0.4	2.361	0.499	223063_at	ENSG00000119280	chromosome 1 open reading frame 198 [Source:HGNC Symbol;Acc:HGNC:25900]	chr1	230837119	230869589	-1	q42.2	C1orf198	47.8	protein_coding	5161
0.0035961	0.504	1.739	0.676	213068_at	ENSG00000143196	dermatopontin [Source:HGNC Symbol;Acc:HGNC:3011]	chr1	168695468	168729206	-1	q24.2	DPT	42.19	protein_coding	1719
0.002343	0.484	0.443	0.508	228851_s_at	ENSG00000143420	endosulfine alpha [Source:HGNC Symbol;Acc:HGNC:3360]	chr1	150600851	150629612	-1	q21.3	ENSA	45.32	protein_coding	4619
0.0081731	0.519	0.465	0.488	218361_at	ENSG00000143457	golgi phosphoprotein 3 like [Source:HGNC Symbol;Acc:HGNC:24882]	chr1	150646230	150697154	-1	q21.3	GOLPH3L	40.09	protein_coding	3334
0.0097793	0.519	0.588	0.61	221664_s_at	ENSG00000158769	F11 receptor [Source:HGNC Symbol;Acc:HGNC:14685]	chr1	160995211	161021343	-1	q23.3	F11R	47.23	protein_coding	5061
0.0002389	0.262	1.599	0.976	213422_s_at	ENSG00000162576	matrix remodeling associated 8 [Source:HGNC Symbol;Acc:HGNC:7542]	chr1	1352689	1361777	-1	p36.33	MXRA8	65.3	protein_coding	3622
0.0053789	0.504	1.663	0.671	1554980_a_at	ENSG00000162772	activating transcription factor 3 [Source:HGNC Symbol;Acc:HGNC:785]	chr1	212565334	212620777	1	q32.3	ATF3	43.16	protein_coding	4040
0.0078733	0.519	1.557	0.672	214799_at	ENSG00000163531	neurofascin [Source:HGNC Symbol;Acc:HGNC:29866]	chr1	204828651	205022822	1	q32.1	NFASC	47.92	protein_coding	21271
0.0035226	0.504	0.745	1.153	205186_at	ENSG00000163879	dynein axonemal light intermediate chain 1 [Source:HGNC Symbol;Acc:HGNC:14353]	chr1	37556919	37566857	1	p34.3	DNALI1	49.25	protein_coding	4456
0.0017313	0.473	1.559	0.832	201465_s_at	ENSG00000177606	Jun proto-oncogene, AP-1 transcription factor subunit [Source:HGNC Symbol;Acc:HGNC:6204]	chr1	58776845	58784048	-1	p32.1	JUN	47.04	protein_coding	3624
0.0001596	0.256	2.212	0.575	213281_at	ENSG00000177606	Jun proto-oncogene, AP-1 transcription factor subunit [Source:HGNC Symbol;Acc:HGNC:6204]	chr1	58776845	58784048	-1	p32.1	JUN	47.04	protein_coding	3624
0.0011692	0.398	1.803	0.745	201464_x_at	ENSG00000177606	Jun proto-oncogene, AP-1 transcription factor subunit [Source:HGNC Symbol;Acc:HGNC:6204]	chr1	58776845	58784048	-1	p32.1	JUN	47.04	protein_coding	3624
0.0047717	0.504	1.411	1.047	201466_s_at	ENSG00000177606	Jun proto-oncogene, AP-1 transcription factor subunit [Source:HGNC Symbol;Acc:HGNC:6204]	chr1	58776845	58784048	-1	p32.1	JUN	47.04	protein_coding	3624
0.0031392	0.498	1.568	0.878	1558501_at	ENSG00000197959	dynamin 3 [Source:HGNC Symbol;Acc:HGNC:29125]	chr1	171841498	172418466	1	q24.3	DNM3	37.28	protein_coding	11329
0.0068943	0.519	0.45	0.503	1552481_s_at	ENSG00000198162	mannosidase alpha class 1A member 2 [Source:HGNC Symbol;Acc:HGNC:6822]	chr1	117367449	117528872	1	p12	MAN1A2	35.34	protein_coding	9667
0.0020831	0.483	2.333	0.446	228209_at	ENSG00000230124	acyl-CoA binding domain containing 6 [Source:HGNC Symbol;Acc:HGNC:23339]	chr1	180269653	180502954	-1	q25.3	ACBD6	37.67	protein_coding	7512
0.0046459	0.504	1.529	0.808	208961_s_at	ENSG00000067082	Kruppel like factor 6 [Source:HGNC Symbol;Acc:HGNC:2235]	chr10	3775996	3785281	-1	p15.2	KLF6	48.08	protein_coding	6139
0.0090247	0.519	1.459	0.826	208960_s_at	ENSG00000067082	Kruppel like factor 6 [Source:HGNC Symbol;Acc:HGNC:2235]	chr10	3775996	3785281	-1	p15.2	KLF6	48.08	protein_coding	6139
0.0060916	0.516	1.557	0.807	1555832_s_at	ENSG00000067082	Kruppel like factor 6 [Source:HGNC Symbol;Acc:HGNC:2235]	chr10	3775996	3785281	-1	p15.2	KLF6	48.08	protein_coding	6139
0.0060772	0.516	1.724	0.603	1563321_s_at	ENSG00000078403	MLLT10 histone lysine methyltransferase DOT1L cofactor [Source:HGNC Symbol;Acc:HGNC:16063]	chr10	21524646	21743630	1	p12.31	MLLT10	39.77	protein_coding	9130
0.0053832	0.504	1.79	0.529	213252_at	ENSG00000107957	SH3 and PX domains 2A [Source:HGNC Symbol;Acc:HGNC:23664]	chr10	103594027	103855543	-1	q24.33	SH3PXD2A	51.58	protein_coding	11756
0.0050102	0.504	0.587	0.635	217496_s_at	ENSG00000119912	insulin degrading enzyme [Source:HGNC Symbol;Acc:HGNC:5381]	chr10	92451684	92574096	-1	q23.33	IDE	40.71	protein_coding	16811
0.0031025	0.498	1.553	0.786	209975_at	ENSG00000130649	cytochrome P450 family 2 subfamily E member 1 [Source:HGNC Symbol;Acc:HGNC:2631]	chr10	133520406	133561220	1	q26.3	CYP2E1	45.85	protein_coding	9622
0.0008807	0.354	1.738	0.688	206932_at	ENSG00000138135	cholesterol 25-hydroxylase [Source:HGNC Symbol;Acc:HGNC:1907]	chr10	89205629	89207317	-1	q23.31	CH25H	48.31	protein_coding	1689
0.0082573	0.519	1.774	0.514	212757_s_at	ENSG00000148660	calcium/calmodulin dependent protein kinase II gamma [Source:HGNC Symbol;Acc:HGNC:1463]	chr10	73812501	73874591	-1	q22.2	CAMK2G	51.65	protein_coding	7273
0.0086195	0.519	1.553	0.815	212762_s_at	ENSG00000148737	transcription factor 7 like 2 [Source:HGNC Symbol;Acc:HGNC:11641]	chr10	112950247	113167678	1	q25.2	TCF7L2	44.6	protein_coding	6739
6.96e-05	0.256	1.383	1.264	204465_s_at	ENSG00000148798	internexin neuronal intermediate filament protein alpha [Source:HGNC Symbol;Acc:HGNC:6057]	chr10	103277138	103290346	1	q24.33	INA	45.93	protein_coding	3251
0.0084483	0.519	1.839	0.528	214496_x_at	ENSG00000156650	lysine acetyltransferase 6B [Source:HGNC Symbol;Acc:HGNC:17582]	chr10	74824927	75032624	1	q22.2	KAT6B	40.71	protein_coding	32495
0.0013873	0.423	2.372	0.486	235164_at	ENSG00000175395	zinc finger protein 25 [Source:HGNC Symbol;Acc:HGNC:13043]	chr10	37949573	37976647	-1	p11.21	ZNF25	40.16	protein_coding	4257
0.0066759	0.519	1.255	1.351	236044_at	ENSG00000203805	phospholipid phosphatase 4 [Source:HGNC Symbol;Acc:HGNC:23531]	chr10	120457227	120592065	1	q26.12	PLPP4	42.25	protein_coding	3722
0.0045603	0.504	1.41	0.901	215172_at	ENSG00000204179	protein tyrosine phosphatase non-receptor type 20 [Source:HGNC Symbol;Acc:HGNC:23423]	chr10	46911396	47002488	1	q11.22	PTPN20	36.85	protein_coding	4506
0.0018334	0.481	1.922	0.598	231146_at	ENSG00000213185	family with sequence similarity 24 member B [Source:HGNC Symbol;Acc:HGNC:23475]	chr10	122849078	122879641	-1	q26.13	FAM24B	41.03	protein_coding	1177
0.0024493	0.484	1.717	0.6	215358_x_at	ENSG00000234420	zinc finger protein 37B, pseudogene [Source:HGNC Symbol;Acc:HGNC:13103]	chr10	42513510	42552822	-1	q11.21	ZNF37BP	39.07	transcribed_processed_pseudogene	10256
0.003808	0.504	0.598	0.698	1553694_a_at	ENSG00000011405	phosphatidylinositol-4-phosphate 3-kinase catalytic subunit type 2 alpha [Source:HGNC Symbol;Acc:HGNC:8971]	chr11	17077730	17207983	-1	p15.1	PIK3C2A	39.84	protein_coding	9204
0.0006994	0.335	0.51	0.619	225811_at	ENSG00000110696	chromosome 11 open reading frame 58 [Source:HGNC Symbol;Acc:HGNC:16990]	chr11	16613132	16758340	1	p15.2	C11orf58	38.18	protein_coding	10342
0.0047115	0.504	0.514	0.484	201784_s_at	ENSG00000110696	chromosome 11 open reading frame 58 [Source:HGNC Symbol;Acc:HGNC:16990]	chr11	16613132	16758340	1	p15.2	C11orf58	38.18	protein_coding	10342
0.0099379	0.519	1.245	1.499	205267_at	ENSG00000110777	POU class 2 homeobox associating factor 1 [Source:HGNC Symbol;Acc:HGNC:9211]	chr11	111352255	111455630	-1	q23.1	POU2AF1	45.99	protein_coding	6996
0.0022937	0.484	0.471	0.521	201239_s_at	ENSG00000118363	signal peptidase complex subunit 2 [Source:HGNC Symbol;Acc:HGNC:28962]	chr11	74949247	74979033	1	q13.4	SPCS2	39.26	protein_coding	2984
0.0092468	0.519	0.597	0.649	212590_at	ENSG00000133818	RAS related 2 [Source:HGNC Symbol;Acc:HGNC:17271]	chr11	14277922	14364506	-1	p15.2	RRAS2	39.24	protein_coding	3456
0.0050698	0.504	0.631	0.752	208456_s_at	ENSG00000133818	RAS related 2 [Source:HGNC Symbol;Acc:HGNC:17271]	chr11	14277922	14364506	-1	p15.2	RRAS2	39.24	protein_coding	3456
0.00141	0.424	0.56	0.553	200650_s_at	ENSG00000134333	lactate dehydrogenase A [Source:HGNC Symbol;Acc:HGNC:6535]	chr11	18394560	18408425	1	p15.1	LDHA	43.95	protein_coding	6038
0.0043405	0.504	0.499	0.584	242196_at	ENSG00000134909	Rho GTPase activating protein 32 [Source:HGNC Symbol;Acc:HGNC:17399]	chr11	128965060	129279324	-1	q24.3	ARHGAP32	36.86	protein_coding	12968
0.0028353	0.498	0.558	0.644	202886_s_at	ENSG00000137713	protein phosphatase 2 scaffold subunit Abeta [Source:HGNC Symbol;Acc:HGNC:9303]	chr11	111726908	111766389	-1	q23.1	PPP2R1B	44.53	protein_coding	6686
0.0035459	0.504	0.636	0.696	202005_at	ENSG00000149418	ST14 transmembrane serine protease matriptase [Source:HGNC Symbol;Acc:HGNC:11344]	chr11	130159782	130210362	1	q24.3	ST14	51.85	protein_coding	4116
0.0021552	0.484	0.614	0.759	216905_s_at	ENSG00000149418	ST14 transmembrane serine protease matriptase [Source:HGNC Symbol;Acc:HGNC:11344]	chr11	130159782	130210362	1	q24.3	ST14	51.85	protein_coding	4116
0.0009154	0.356	2.197	0.517	226523_at	ENSG00000149591	transgelin [Source:HGNC Symbol;Acc:HGNC:11553]	chr11	117199370	117207464	1	q23.3	TAGLN	56.95	protein_coding	6550
0.0077539	0.519	0.591	0.617	1554397_s_at	ENSG00000151116	UEV and lactate/malate dehyrogenase domains [Source:HGNC Symbol;Acc:HGNC:30866]	chr11	18529609	18588747	-1	p15.1	UEVLD	40.83	protein_coding	5515
0.00739	0.519	0.565	0.563	221669_s_at	ENSG00000151498	acyl-CoA dehydrogenase family member 8 [Source:HGNC Symbol;Acc:HGNC:87]	chr11	134253548	134265855	1	q25	ACAD8	47.77	protein_coding	7121
0.0062561	0.518	0.555	0.557	212623_at	ENSG00000166471	transmembrane protein 41B [Source:HGNC Symbol;Acc:HGNC:28948]	chr11	9280654	9314636	-1	p15.4	TMEM41B	42.34	protein_coding	4278
0.006925	0.519	0.561	0.558	222507_s_at	ENSG00000175348	TMEM9 domain family member B [Source:HGNC Symbol;Acc:HGNC:1168]	chr11	8947202	8965011	-1	p15.4	TMEM9B	42.66	protein_coding	2825
0.0043876	0.504	0.559	0.566	201048_x_at	ENSG00000175582	RAB6A, member RAS oncogene family [Source:HGNC Symbol;Acc:HGNC:9786]	chr11	73675638	73761137	-1	q13.4	RAB6A	41.4	protein_coding	4896
0.0048132	0.504	1.544	0.789	222020_s_at	ENSG00000182667	neurotrimin [Source:HGNC Symbol;Acc:HGNC:17941]	chr11	131370478	132336822	1	q25	NTM	43.25	protein_coding	6956
0.007982	0.519	0.477	0.46	202060_at	ENSG00000198730	CTR9 homolog, Paf1/RNA polymerase II complex component [Source:HGNC Symbol;Acc:HGNC:16850]	chr11	10751246	10801625	1	p15.4	CTR9	40.97	protein_coding	5770
0.0073783	0.519	0.612	0.644	226717_at	ENSG00000284922	leucine rich transmembrane and O-methyltransferase domain containing [Source:NCBI gene (formerly Entrezgene);Acc:220074]	chr11	72080331	72110782	1	q13.4		48.88	protein_coding	3830
0.0076456	0.519	1.755	0.649	36030_at	ENSG00000010295	intermediate filament family orphan 1 [Source:HGNC Symbol;Acc:HGNC:24970]	chr12	6538961	6556073	-1	p13.31	IFFO1	54.33	protein_coding	4945
0.0093898	0.519	1.945	0.511	209721_s_at	ENSG00000010295	intermediate filament family orphan 1 [Source:HGNC Symbol;Acc:HGNC:24970]	chr12	6538961	6556073	-1	p13.31	IFFO1	54.33	protein_coding	4945
0.0084802	0.519	0.693	1.152	239132_at	ENSG00000089250	nitric oxide synthase 1 [Source:HGNC Symbol;Acc:HGNC:7872]	chr12	117208142	117452170	-1	q24.22	NOS1	47.35	protein_coding	13113
0.0004314	0.317	1.593	0.78	205303_at	ENSG00000121361	potassium inwardly rectifying channel subfamily J member 8 [Source:HGNC Symbol;Acc:HGNC:6269]	chr12	21764955	21775600	-1	p12.1	KCNJ8	40.64	protein_coding	2511
0.0029887	0.498	1.596	0.73	205304_s_at	ENSG00000121361	potassium inwardly rectifying channel subfamily J member 8 [Source:HGNC Symbol;Acc:HGNC:6269]	chr12	21764955	21775600	-1	p12.1	KCNJ8	40.64	protein_coding	2511
0.0026459	0.495	1.388	1.058	204964_s_at	ENSG00000123096	sarcospan [Source:HGNC Symbol;Acc:HGNC:11322]	chr12	26121991	26299290	1	p12.1	SSPN	41.2	protein_coding	6780
0.0080989	0.519	1.343	0.964	202340_x_at	ENSG00000123358	nuclear receptor subfamily 4 group A member 1 [Source:HGNC Symbol;Acc:HGNC:7980]	chr12	52022832	52059507	1	q13.13	NR4A1	56.01	protein_coding	7295
0.0066515	0.519	0.601	0.581	210716_s_at	ENSG00000130779	CAP-Gly domain containing linker protein 1 [Source:HGNC Symbol;Acc:HGNC:10461]	chr12	122271432	122422669	-1	q24.31	CLIP1	43.9	protein_coding	18596
0.0039349	0.504	1.399	0.981	231202_at	ENSG00000136010	aldehyde dehydrogenase 1 family member L2 [Source:HGNC Symbol;Acc:HGNC:26777]	chr12	105019784	105107643	-1	q23.3	ALDH1L2	40.08	protein_coding	9493
0.0084614	0.519	1.631	0.679	206150_at	ENSG00000139193	CD27 molecule [Source:HGNC Symbol;Acc:HGNC:11922]	chr12	6444955	6451718	1	p13.31	CD27	51.49	protein_coding	1322
0.0059577	0.516	1.288	1.314	229554_at	ENSG00000139329	lumican [Source:HGNC Symbol;Acc:HGNC:6724]	chr12	91102629	91111494	-1	q21.33	LUM	35.07	protein_coding	2671
0.003657	0.504	1.683	0.689	227300_at	ENSG00000183160	transmembrane protein 119 [Source:HGNC Symbol;Acc:HGNC:27884]	chr12	108589851	108598320	-1	q23.3	TMEM119	56.19	protein_coding	3184
0.0086702	0.519	0.711	1.046	220442_at	ENSG00000257594	polypeptide N-acetylgalactosaminyltransferase 4 [Source:HGNC Symbol;Acc:HGNC:4126]	chr12	89519412	89524796	-1	q21.33	GALNT4	39.46	protein_coding	5385
0.0024122	0.484	0.629	0.78	235341_at	ENSG00000102580	DnaJ heat shock protein family (Hsp40) member C3 [Source:HGNC Symbol;Acc:HGNC:9439]	chr13	95677139	95794988	1	q32.1	DNAJC3	39.79	protein_coding	5590
0.008207	0.519	0.663	0.774	220240_s_at	ENSG00000150403	transmembrane and coiled-coil domains 3 [Source:HGNC Symbol;Acc:HGNC:20329]	chr13	113491021	113554590	1	q34	TMCO3	48.37	protein_coding	10381
0.0009172	0.356	1.408	1.162	219737_s_at	ENSG00000184226	protocadherin 9 [Source:HGNC Symbol;Acc:HGNC:8661]	chr13	66302834	67230445	-1	q21.32	PCDH9	34.66	protein_coding	30944
0.0047963	0.504	0.495	0.54	217859_s_at	ENSG00000029364	solute carrier family 39 member 9 [Source:HGNC Symbol;Acc:HGNC:20182]	chr14	69398015	69462390	1	q24.1	SLC39A9	40.2	protein_coding	7138
0.0018042	0.481	1.877	0.59	222494_at	ENSG00000053254	forkhead box N3 [Source:HGNC Symbol;Acc:HGNC:1928]	chr14	89124871	89619149	-1	q32.11	FOXN3	44.31	protein_coding	11154
0.0030431	0.498	1.806	0.62	205022_s_at	ENSG00000053254	forkhead box N3 [Source:HGNC Symbol;Acc:HGNC:1928]	chr14	89124871	89619149	-1	q32.11	FOXN3	44.31	protein_coding	11154
0.0080161	0.519	1.572	0.736	218031_s_at	ENSG00000053254	forkhead box N3 [Source:HGNC Symbol;Acc:HGNC:1928]	chr14	89124871	89619149	-1	q32.11	FOXN3	44.31	protein_coding	11154
0.0041778	0.504	1.255	1.306	204400_at	ENSG00000100842	embryonal Fyn-associated substrate [Source:HGNC Symbol;Acc:HGNC:16898]	chr14	23356403	23365752	-1	q11.2	EFS	54.29	protein_coding	3236
0.0093106	0.519	1.288	1.226	209189_at	ENSG00000170345	Fos proto-oncogene, AP-1 transcription factor subunit [Source:HGNC Symbol;Acc:HGNC:3796]	chr14	75278826	75282230	1	q24.3	FOS	54.04	protein_coding	3186
0.0068928	0.519	1.197	1.85	216491_x_at	ENSG00000211899	immunoglobulin heavy constant mu [Source:HGNC Symbol;Acc:HGNC:5541]	chr14	105851705	105856218	-1	q32.33	IGHM	61.79	IG_C_gene	1871
0.0012628	0.404	1.742	0.631	227409_at	ENSG00000235194	protein phosphatase 1 regulatory subunit 3E [Source:HGNC Symbol;Acc:HGNC:14943]	chr14	23295652	23302859	-1	q11.2	PPP1R3E	51.8	protein_coding	5550
0.0094027	0.519	1.577	0.648	227412_at	ENSG00000235194	protein phosphatase 1 regulatory subunit 3E [Source:HGNC Symbol;Acc:HGNC:14943]	chr14	23295652	23302859	-1	q11.2	PPP1R3E	51.8	protein_coding	5550
0.0032107	0.498	1.782	0.617	229001_at	ENSG00000235194	protein phosphatase 1 regulatory subunit 3E [Source:HGNC Symbol;Acc:HGNC:14943]	chr14	23295652	23302859	-1	q11.2	PPP1R3E	51.8	protein_coding	5550
0.001895	0.481	0.575	0.665	214544_s_at	ENSG00000092531	synaptosome associated protein 23 [Source:HGNC Symbol;Acc:HGNC:11131]	chr15	42491233	42545356	1	q15.1	SNAP23	42.25	protein_coding	5852
0.0043818	0.504	0.637	0.743	209131_s_at	ENSG00000092531	synaptosome associated protein 23 [Source:HGNC Symbol;Acc:HGNC:11131]	chr15	42491233	42545356	1	q15.1	SNAP23	42.25	protein_coding	5852
0.0055425	0.509	0.534	0.527	217781_s_at	ENSG00000103994	zinc finger protein 106 [Source:HGNC Symbol;Acc:HGNC:12886]	chr15	42412823	42491141	-1	q15.1	ZNF106	41.36	protein_coding	12226
0.0084316	0.519	0.583	0.626	241990_at	ENSG00000104140	ras homolog family member V [Source:HGNC Symbol;Acc:HGNC:18313]	chr15	40872214	40874234	-1	q15.1	RHOV	61.95	protein_coding	1650
0.0077059	0.519	0.547	0.544	204125_at	ENSG00000137806	NADH:ubiquinone oxidoreductase complex assembly factor 1 [Source:HGNC Symbol;Acc:HGNC:18828]	chr15	41387218	41409403	-1	q15.1	NDUFAF1	46.91	protein_coding	3991
0.0041272	0.504	1.449	0.928	222899_at	ENSG00000137809	integrin subunit alpha 11 [Source:HGNC Symbol;Acc:HGNC:6136]	chr15	68296532	68432163	-1	q23	ITGA11	49.23	protein_coding	10866
0.0002577	0.262	0.512	0.677	220800_s_at	ENSG00000138594	tropomodulin 3 [Source:HGNC Symbol;Acc:HGNC:11873]	chr15	51829628	51947295	1	q21.2	TMOD3	41.02	protein_coding	10632
0.00073	0.335	1.62	0.801	206117_at	ENSG00000140416	tropomyosin 1 [Source:HGNC Symbol;Acc:HGNC:12010]	chr15	63042632	63071915	1	q22.2	TPM1	45.06	protein_coding	13765
0.0001875	0.262	0.655	0.816	202826_at	ENSG00000166145	serine peptidase inhibitor, Kunitz type 1 [Source:HGNC Symbol;Acc:HGNC:11246]	chr15	40844018	40858207	1	q15.1	SPINT1	53.63	protein_coding	3542
0.0024982	0.484	1.245	1.621	218468_s_at	ENSG00000166923	gremlin 1, DAN family BMP antagonist [Source:HGNC Symbol;Acc:HGNC:2001]	chr15	32718004	32745106	1	q13.3	GREM1	41.45	protein_coding	14784
0.000817	0.335	1.249	1.758	218469_at	ENSG00000166923	gremlin 1, DAN family BMP antagonist [Source:HGNC Symbol;Acc:HGNC:2001]	chr15	32718004	32745106	1	q13.3	GREM1	41.45	protein_coding	14784
0.003356	0.503	0.567	0.61	223084_s_at	ENSG00000166946	cyclin D1 binding protein 1 [Source:HGNC Symbol;Acc:HGNC:1587]	chr15	43185118	43197177	1	q15.2	CCNDBP1	40.9	protein_coding	6655
0.0051926	0.504	1.932	0.527	227039_at	ENSG00000170776	A-kinase anchoring protein 13 [Source:HGNC Symbol;Acc:HGNC:371]	chr15	85380571	85749358	1	q25.3	AKAP13	39.92	protein_coding	20280
0.0006527	0.335	1.556	0.956	223468_s_at	ENSG00000182175	repulsive guidance molecule BMP co-receptor a [Source:HGNC Symbol;Acc:HGNC:30308]	chr15	93035273	93089204	-1	q26.1	RGMA	52.94	protein_coding	13221
0.0085945	0.519	0.539	0.501	214665_s_at	ENSG00000187446	calcineurin like EF-hand protein 1 [Source:HGNC Symbol;Acc:HGNC:17433]	chr15	41230839	41281887	1	q15.1	CHP1	44.02	protein_coding	3947
0.0015646	0.445	0.597	0.767	207993_s_at	ENSG00000187446	calcineurin like EF-hand protein 1 [Source:HGNC Symbol;Acc:HGNC:17433]	chr15	41230839	41281887	1	q15.1	CHP1	44.02	protein_coding	3947
0.0001656	0.256	0.612	1.072	201130_s_at	ENSG00000039068	cadherin 1 [Source:HGNC Symbol;Acc:HGNC:1748]	chr16	68737292	68835537	1	q22.1	CDH1	46.88	protein_coding	6076
0.0059519	0.516	0.757	0.978	201131_s_at	ENSG00000039068	cadherin 1 [Source:HGNC Symbol;Acc:HGNC:1748]	chr16	68737292	68835537	1	q22.1	CDH1	46.88	protein_coding	6076
0.0002497	0.262	0.621	0.909	203028_s_at	ENSG00000051523	cytochrome b-245 alpha chain [Source:HGNC Symbol;Acc:HGNC:2577]	chr16	88643289	88651054	-1	q24.2	CYBA	61.63	protein_coding	3253
0.0064299	0.519	0.765	1.227	202525_at	ENSG00000052344	serine protease 8 [Source:HGNC Symbol;Acc:HGNC:9491]	chr16	31131433	31135727	-1	p11.2	PRSS8	58.95	protein_coding	2975
0.0091608	0.519	1.963	0.448	201000_at	ENSG00000090861	alanyl-tRNA synthetase 1 [Source:HGNC Symbol;Acc:HGNC:20]	chr16	70251983	70289707	-1	q22.1	AARS1	49.58	protein_coding	10248
0.0096333	0.519	0.552	0.596	227382_at	ENSG00000103018	cytochrome b5 type B [Source:HGNC Symbol;Acc:HGNC:24374]	chr16	69424619	69466264	1	q22.1	CYB5B	39.75	protein_coding	6807
0.0019515	0.481	0.444	0.505	219136_s_at	ENSG00000103227	lipase maturation factor 1 [Source:HGNC Symbol;Acc:HGNC:14154]	chr16	853634	981318	-1	p13.3	LMF1	56.82	protein_coding	8218
0.0053446	0.504	0.616	0.702	238775_at	ENSG00000129636	integrin alpha FG-GAP repeat containing 1 [Source:HGNC Symbol;Acc:HGNC:30697]	chr16	47154387	47464149	-1	q12.1	ITFG1	37.51	protein_coding	7719
0.0045406	0.504	0.543	0.591	221449_s_at	ENSG00000129636	integrin alpha FG-GAP repeat containing 1 [Source:HGNC Symbol;Acc:HGNC:30697]	chr16	47154387	47464149	-1	q12.1	ITFG1	37.51	protein_coding	7719
0.0075104	0.519	0.706	0.92	227290_at	ENSG00000166446	chromodomain Y like 2 [Source:HGNC Symbol;Acc:HGNC:23030]	chr16	80597907	80804598	-1	q23.2	CDYL2	41.9	protein_coding	8825
0.0008075	0.335	0.554	0.836	230281_at	ENSG00000166455	chromosome 16 open reading frame 46 [Source:HGNC Symbol;Acc:HGNC:26525]	chr16	81053497	81077267	-1	q23.2	C16orf46	43.5	protein_coding	2376
0.0029967	0.498	1.515	0.766	227192_at	ENSG00000167371	proline rich transmembrane protein 2 [Source:HGNC Symbol;Acc:HGNC:30500]	chr16	29811382	29815892	1	p11.2	PRRT2	61.52	protein_coding	3755
0.0053605	0.504	0.488	0.489	218354_at	ENSG00000167515	trafficking protein particle complex 2 like [Source:HGNC Symbol;Acc:HGNC:30887]	chr16	88856220	88862686	1	q24.3	TRAPPC2L	58.39	protein_coding	4463
0.0047498	0.504	1.421	0.889	216474_x_at	ENSG00000172236	tryptase alpha/beta 1 [Source:HGNC Symbol;Acc:HGNC:12019]	chr16	1240379	1242554	1	p13.3	TPSAB1	67.05	protein_coding	1583
0.0030113	0.498	0.721	1.326	223786_at	ENSG00000183196	carbohydrate sulfotransferase 6 [Source:HGNC Symbol;Acc:HGNC:6938]	chr16	75472052	75495445	-1	q23.1	CHST6	49.97	protein_coding	8620
0.0093783	0.519	0.632	0.724	230967_s_at	ENSG00000187555	ubiquitin specific peptidase 7 [Source:HGNC Symbol;Acc:HGNC:12630]	chr16	8892097	8975328	-1	p13.2	USP7	46.42	protein_coding	8623
0.0058212	0.516	1.517	0.846	203167_at	ENSG00000035862	TIMP metallopeptidase inhibitor 2 [Source:HGNC Symbol;Acc:HGNC:11821]	chr17	78852977	78925387	-1	q25.3	TIMP2	52.6	protein_coding	5633
0.0078712	0.519	0.736	1.219	242064_at	ENSG00000069188	sidekick cell adhesion molecule 2 [Source:HGNC Symbol;Acc:HGNC:19308]	chr17	73334384	73644445	-1	q25.1	SDK2	52.32	protein_coding	11963
0.0091601	0.519	0.579	0.569	227784_s_at	ENSG00000166685	component of oligomeric golgi complex 1 [Source:HGNC Symbol;Acc:HGNC:6545]	chr17	73192632	73208507	1	q25.1	COG1	49.15	protein_coding	5317
0.0078876	0.519	0.611	0.669	205293_x_at	ENSG00000175866	BAR/IMD domain containing adaptor protein 2 [Source:HGNC Symbol;Acc:HGNC:947]	chr17	81035122	81117434	1	q25.3	BAIAP2	60.69	protein_coding	10294
0.0021976	0.484	1.492	1.005	208790_s_at	ENSG00000177469	caveolae associated protein 1 [Source:HGNC Symbol;Acc:HGNC:9688]	chr17	42402449	42423256	-1	q21.2	CAVIN1	52.49	protein_coding	3570
0.0083168	0.519	1.537	0.844	208789_at	ENSG00000177469	caveolae associated protein 1 [Source:HGNC Symbol;Acc:HGNC:9688]	chr17	42402449	42423256	-1	q21.2	CAVIN1	52.49	protein_coding	3570
0.0094907	0.519	0.658	0.743	226833_at	ENSG00000182224	cytochrome b5 domain containing 1 [Source:HGNC Symbol;Acc:HGNC:26516]	chr17	7857746	7862282	1	p13.1	CYB5D1	48.18	protein_coding	3980
0.0026308	0.495	1.573	0.816	236075_s_at	ENSG00000234327	ZNF232 antisense RNA 1 [Source:HGNC Symbol;Acc:HGNC:40623]	chr17	5111468	5115004	1	p13.2	ZNF232-AS1	48.26	lncRNA	2006
0.0071587	0.519	0.584	0.609	202129_s_at	ENSG00000101782	RIO kinase 3 [Source:HGNC Symbol;Acc:HGNC:11451]	chr18	23453287	23486603	1	q11.2	RIOK3	41.69	protein_coding	4856
0.0092072	0.519	0.696	0.826	204143_s_at	ENSG00000132199	enolase superfamily member 1 [Source:HGNC Symbol;Acc:HGNC:30365]	chr18	670318	712662	-1	p11.32	ENOSF1	46.09	protein_coding	11390
0.0066564	0.519	1.227	1.489	226677_at	ENSG00000198795	zinc finger protein 521 [Source:HGNC Symbol;Acc:HGNC:24605]	chr18	25061924	25352190	-1	q11.2	ZNF521	38.07	protein_coding	6225
0.0013028	0.404	1.298	1.417	226676_at	ENSG00000198795	zinc finger protein 521 [Source:HGNC Symbol;Acc:HGNC:24605]	chr18	25061924	25352190	-1	q11.2	ZNF521	38.07	protein_coding	6225
0.0001114	0.256	0.412	0.501	216483_s_at	ENSG00000074842	myeloid derived growth factor [Source:HGNC Symbol;Acc:HGNC:16948]	chr19	4641374	4670362	-1	p13.3	MYDGF	54.73	protein_coding	1670
0.0074179	0.519	0.592	0.626	230063_at	ENSG00000083844	zinc finger protein 264 [Source:HGNC Symbol;Acc:HGNC:13057]	chr19	57191500	57222846	1	q13.43	ZNF264	44.47	protein_coding	12532
0.0032165	0.498	1.539	0.815	224494_x_at	ENSG00000087076	hydroxysteroid 17-beta dehydrogenase 14 [Source:HGNC Symbol;Acc:HGNC:23238]	chr19	48813018	48836510	-1	q13.33	HSD17B14	51.4	protein_coding	1112
0.0082698	0.519	1.751	0.609	219113_x_at	ENSG00000087076	hydroxysteroid 17-beta dehydrogenase 14 [Source:HGNC Symbol;Acc:HGNC:23238]	chr19	48813018	48836510	-1	q13.33	HSD17B14	51.4	protein_coding	1112
0.0065474	0.519	1.399	0.966	224252_s_at	ENSG00000089327	FXYD domain containing ion transport regulator 5 [Source:HGNC Symbol;Acc:HGNC:4029]	chr19	35154730	35169881	1	q13.12	FXYD5	49.86	protein_coding	2991
0.0075761	0.519	1.401	0.936	218084_x_at	ENSG00000089327	FXYD domain containing ion transport regulator 5 [Source:HGNC Symbol;Acc:HGNC:4029]	chr19	35154730	35169881	1	q13.12	FXYD5	49.86	protein_coding	2991
0.0055087	0.509	1.543	0.752	204442_x_at	ENSG00000090006	latent transforming growth factor beta binding protein 4 [Source:HGNC Symbol;Acc:HGNC:6717]	chr19	40592883	40629818	1	q13.2	LTBP4	56.48	protein_coding	8110
0.002196	0.484	0.457	0.474	213039_at	ENSG00000104880	Rho/Rac guanine nucleotide exchange factor 18 [Source:HGNC Symbol;Acc:HGNC:17090]	chr19	7348937	7472485	1	p13.2	ARHGEF18	51.25	protein_coding	7671
0.0030501	0.498	0.513	0.563	202122_s_at	ENSG00000105355	perilipin 3 [Source:HGNC Symbol;Acc:HGNC:16893]	chr19	4838341	4867694	-1	p13.3	PLIN3	52.34	protein_coding	2739
0.0053058	0.504	1.164	2.084	205713_s_at	ENSG00000105664	cartilage oligomeric matrix protein [Source:HGNC Symbol;Acc:HGNC:2227]	chr19	18782773	18791305	-1	p13.11	COMP	62.85	protein_coding	3092
0.0043301	0.504	1.913	0.519	203643_at	ENSG00000105722	ETS2 repressor factor [Source:HGNC Symbol;Acc:HGNC:3444]	chr19	42247569	42255128	-1	q13.2	ERF	64.05	protein_coding	3269
0.0011426	0.398	0.432	0.482	202354_s_at	ENSG00000125651	general transcription factor IIF subunit 1 [Source:HGNC Symbol;Acc:HGNC:4652]	chr19	6379572	6393981	-1	p13.3	GTF2F1	54.75	protein_coding	2876
0.0020302	0.481	0.457	0.489	202355_s_at	ENSG00000125651	general transcription factor IIF subunit 1 [Source:HGNC Symbol;Acc:HGNC:4652]	chr19	6379572	6393981	-1	p13.3	GTF2F1	54.75	protein_coding	2876
0.0009743	0.371	0.427	0.468	202356_s_at	ENSG00000125651	general transcription factor IIF subunit 1 [Source:HGNC Symbol;Acc:HGNC:4652]	chr19	6379572	6393981	-1	p13.3	GTF2F1	54.75	protein_coding	2876
0.0045127	0.504	0.457	0.457	202799_at	ENSG00000125656	caseinolytic mitochondrial matrix peptidase proteolytic subunit [Source:HGNC Symbol;Acc:HGNC:2084]	chr19	6361531	6370242	1	p13.3	CLPP	53.34	protein_coding	3531
0.0059284	0.516	1.23	1.495	202768_at	ENSG00000125740	FosB proto-oncogene, AP-1 transcription factor subunit [Source:HGNC Symbol;Acc:HGNC:3797]	chr19	45467995	45475179	1	q13.32	FOSB	57.58	protein_coding	5553
0.0004247	0.317	1.507	0.91	219371_s_at	ENSG00000127528	Kruppel like factor 2 [Source:HGNC Symbol;Acc:HGNC:6347]	chr19	16324826	16328685	1	p13.11	KLF2	62.54	protein_coding	2820
0.0084683	0.519	0.607	0.55	212492_s_at	ENSG00000127663	lysine demethylase 4B [Source:HGNC Symbol;Acc:HGNC:29136]	chr19	4969113	5153598	1	p13.3	KDM4B	57.26	protein_coding	14719
0.0002246	0.262	0.431	0.519	212496_s_at	ENSG00000127663	lysine demethylase 4B [Source:HGNC Symbol;Acc:HGNC:29136]	chr19	4969113	5153598	1	p13.3	KDM4B	57.26	protein_coding	14719
0.0089169	0.519	1.495	0.83	201531_at	ENSG00000128016	ZFP36 ring finger protein [Source:HGNC Symbol;Acc:HGNC:12862]	chr19	39406847	39409412	1	q13.2	ZFP36	59.08	protein_coding	1976
0.0029679	0.498	0.48	0.577	202121_s_at	ENSG00000130724	charged multivesicular body protein 2A [Source:HGNC Symbol;Acc:HGNC:30216]	chr19	58551566	58555105	-1	q13.43	CHMP2A	54.32	protein_coding	2110
0.0007257	0.335	0.433	0.534	224966_s_at	ENSG00000141994	dihydrouridine synthase 3 like [Source:HGNC Symbol;Acc:HGNC:26920]	chr19	5784832	5791225	-1	p13.3	DUS3L	61.95	protein_coding	3629
0.0061647	0.516	1.696	0.65	224846_at	ENSG00000160410	SH3KBP1 binding protein 1 [Source:HGNC Symbol;Acc:HGNC:19214]	chr19	40576853	40591399	1	q13.2	SHKBP1	53.52	protein_coding	3934
0.0092376	0.519	1.532	0.792	204570_at	ENSG00000161281	cytochrome c oxidase subunit 7A1 [Source:HGNC Symbol;Acc:HGNC:2287]	chr19	36150922	36152449	-1	q13.12	COX7A1	63.15	protein_coding	586
0.0096691	0.519	0.59	0.615	228251_at	ENSG00000167671	UBX domain protein 6 [Source:HGNC Symbol;Acc:HGNC:14928]	chr19	4444999	4457794	-1	p13.3	UBXN6	60	protein_coding	5247
0.0049701	0.504	1.537	0.793	204999_s_at	ENSG00000169136	activating transcription factor 5 [Source:HGNC Symbol;Acc:HGNC:790]	chr19	49928702	49933935	1	q13.33	ATF5	55.56	protein_coding	2892
0.0016715	0.463	0.711	1.091	228648_at	ENSG00000171236	leucine rich alpha-2-glycoprotein 1 [Source:HGNC Symbol;Acc:HGNC:29480]	chr19	4536402	4540036	-1	p13.3	LRG1	55.52	protein_coding	2702
0.0044029	0.504	0.583	0.641	208677_s_at	ENSG00000172270	basigin (Ok blood group) [Source:HGNC Symbol;Acc:HGNC:1116]	chr19	571277	583494	1	p13.3	BSG	62.58	protein_coding	4418
0.0027581	0.498	0.498	0.516	228690_s_at	ENSG00000174886	NADH:ubiquinone oxidoreductase subunit A11 [Source:HGNC Symbol;Acc:HGNC:20371]	chr19	5891276	5904006	-1	p13.3	NDUFA11	59.05	protein_coding	4839
0.0005085	0.335	0.495	0.589	225304_s_at	ENSG00000174886	NADH:ubiquinone oxidoreductase subunit A11 [Source:HGNC Symbol;Acc:HGNC:20371]	chr19	5891276	5904006	-1	p13.3	NDUFA11	59.05	protein_coding	4839
0.0085145	0.519	1.768	0.516	1557091_at	ENSG00000176909	MEF2 activating motif and SAP domain containing transcriptional regulator [Source:HGNC Symbol;Acc:HGNC:26689]	chr19	48712725	48719725	-1	q13.33	MAMSTR	57.95	protein_coding	2286
0.0060435	0.516	1.765	0.652	229871_at	ENSG00000179134	sterile alpha motif domain containing 4B [Source:HGNC Symbol;Acc:HGNC:25492]	chr19	39342396	39385710	1	q13.2	SAMD4B	49.82	protein_coding	8057
0.0007806	0.335	2.053	0.602	227992_s_at	ENSG00000182310	sperm acrosome associated 6 [Source:HGNC Symbol;Acc:HGNC:27113]	chr19	51689128	51712387	1	q13.41	SPACA6	53.8	protein_coding	4113
8.32e-05	0.256	1.584	1.047	206400_at	ENSG00000205076	galectin 7 [Source:HGNC Symbol;Acc:HGNC:6568]	chr19	38770968	38773517	-1	q13.2	LGALS7	58.75	protein_coding	823
0.0049724	0.504	0.566	0.608	202785_at	ENSG00000267855	NADH:ubiquinone oxidoreductase subunit A7 [Source:HGNC Symbol;Acc:HGNC:7691]	chr19	8308768	8321375	-1	p13.2	NDUFA7	52.34	protein_coding	1392
0.0083527	0.519	0.602	0.65	1556123_a_at	ENSG00000269386	RAB11B antisense RNA 1 [Source:HGNC Symbol;Acc:HGNC:44178]	chr19	8374373	8390685	-1	p13.2	RAB11B-AS1	48.55	lncRNA	1156
0.0031744	0.498	1.443	1.111	222453_at	ENSG00000071967	cytochrome b reductase 1 [Source:HGNC Symbol;Acc:HGNC:20797]	chr2	171522247	171558129	1	q31.1	CYBRD1	41.27	protein_coding	5172
0.0061148	0.516	0.712	0.97	215177_s_at	ENSG00000091409	integrin subunit alpha 6 [Source:HGNC Symbol;Acc:HGNC:6142]	chr2	172427354	172506459	1	q31.1	ITGA6	41.78	protein_coding	6679
0.0022886	0.484	1.799	0.629	1556049_at	ENSG00000115310	reticulon 4 [Source:HGNC Symbol;Acc:HGNC:14085]	chr2	54972187	55112621	-1	p16.1	RTN4	38.6	protein_coding	6644
0.003811	0.504	0.652	0.812	232682_at	ENSG00000118242	melanoregulin [Source:HGNC Symbol;Acc:HGNC:25478]	chr2	215942584	216034096	-1	q35	MREG	42.54	protein_coding	3638
0.0046634	0.504	0.743	0.982	219648_at	ENSG00000118242	melanoregulin [Source:HGNC Symbol;Acc:HGNC:25478]	chr2	215942584	216034096	-1	q35	MREG	42.54	protein_coding	3638
0.0068593	0.519	1.613	0.686	204334_at	ENSG00000118263	Kruppel like factor 7 [Source:HGNC Symbol;Acc:HGNC:6350]	chr2	207074137	207167267	-1	q33.3	KLF7	41.5	protein_coding	9262
0.0002431	0.262	1.935	0.577	203849_s_at	ENSG00000130294	kinesin family member 1A [Source:HGNC Symbol;Acc:HGNC:888]	chr2	240713761	240824293	-1	q37.3	KIF1A	58.41	protein_coding	17879
0.0055859	0.509	0.61	0.662	224311_s_at	ENSG00000135932	calcium binding protein 39 [Source:HGNC Symbol;Acc:HGNC:20292]	chr2	230712842	230821075	1	q37.1	CAB39	40.78	protein_coding	5363
0.0087068	0.519	0.55	0.488	231968_at	ENSG00000136731	UDP-glucose glycoprotein glucosyltransferase 1 [Source:HGNC Symbol;Acc:HGNC:15663]	chr2	128091200	128195677	1	q14.3	UGGT1	40.84	protein_coding	11349
0.0033759	0.503	1.527	0.799	230494_at	ENSG00000144136	solute carrier family 20 member 1 [Source:HGNC Symbol;Acc:HGNC:10946]	chr2	112645939	112663825	1	q14.1	SLC20A1	42.28	protein_coding	5493
0.0003547	0.315	0.463	0.532	212008_at	ENSG00000144224	UBX domain protein 4 [Source:HGNC Symbol;Acc:HGNC:14860]	chr2	135741734	135785056	1	q21.3	UBXN4	39.75	protein_coding	4998
0.0035815	0.504	0.484	0.446	226948_at	ENSG00000144468	rhomboid domain containing 1 [Source:HGNC Symbol;Acc:HGNC:23081]	chr2	226835581	226999215	1	q36.3	RHBDD1	39.57	protein_coding	6926
0.0073134	0.519	0.537	0.529	201712_s_at	ENSG00000153201	RAN binding protein 2 [Source:HGNC Symbol;Acc:HGNC:9848]	chr2	108719482	108785809	1	q13	RANBP2	39.01	protein_coding	12299
0.0070808	0.519	0.783	1.261	238567_at	ENSG00000163082	sphingosine-1-phosphate phosphatase 2 [Source:HGNC Symbol;Acc:HGNC:19953]	chr2	222424543	222562621	1	q36.1	SGPP2	41.76	protein_coding	4983
0.006441	0.519	1.737	0.623	202656_s_at	ENSG00000179833	SERTA domain containing 2 [Source:HGNC Symbol;Acc:HGNC:30784]	chr2	64631621	64751005	-1	p14	SERTAD2	40.14	protein_coding	6274
0.0078713	0.519	1.656	0.672	202657_s_at	ENSG00000179833	SERTA domain containing 2 [Source:HGNC Symbol;Acc:HGNC:30784]	chr2	64631621	64751005	-1	p14	SERTAD2	40.14	protein_coding	6274
0.0087858	0.519	1.359	1.028	238964_at	ENSG00000182263	fidgetin, microtubule severing factor [Source:HGNC Symbol;Acc:HGNC:13285]	chr2	163593396	163736012	-1	q24.3	FIGN	36.3	protein_coding	9942
0.0093025	0.519	0.489	0.429	224173_s_at	ENSG00000185414	mitochondrial ribosomal protein L30 [Source:HGNC Symbol;Acc:HGNC:14036]	chr2	99181152	99199561	1	q11.2	MRPL30	40.16	protein_coding	4760
0.000405	0.317	2.032	0.669	209683_at	ENSG00000197872	CYFIP related Rac1 interactor A [Source:HGNC Symbol;Acc:HGNC:25373]	chr2	16549459	16666331	-1	p24.2	CYRIA	42.98	protein_coding	5448
0.0097243	0.519	0.545	0.545	225324_at	ENSG00000088766	cardiolipin synthase 1 [Source:HGNC Symbol;Acc:HGNC:16148]	chr20	6006093	6040053	1	p12.3	CRLS1	39.36	protein_coding	5367
0.0053013	0.504	0.638	0.791	228291_s_at	ENSG00000088970	kizuna centrosomal protein [Source:HGNC Symbol;Acc:HGNC:15865]	chr20	21125983	21246622	1	p11.23	KIZ	41.17	protein_coding	5207
0.0068957	0.519	0.626	0.74	228290_at	ENSG00000088970	kizuna centrosomal protein [Source:HGNC Symbol;Acc:HGNC:15865]	chr20	21125983	21246622	1	p11.23	KIZ	41.17	protein_coding	5207
0.0086404	0.519	0.614	0.738	233241_at	ENSG00000088970	kizuna centrosomal protein [Source:HGNC Symbol;Acc:HGNC:15865]	chr20	21125983	21246622	1	p11.23	KIZ	41.17	protein_coding	5207
0.0024398	0.484	0.645	0.886	219961_s_at	ENSG00000088970	kizuna centrosomal protein [Source:HGNC Symbol;Acc:HGNC:15865]	chr20	21125983	21246622	1	p11.23	KIZ	41.17	protein_coding	5207
0.0052032	0.504	0.557	0.673	228236_at	ENSG00000101276	solute carrier family 52 member 3 [Source:HGNC Symbol;Acc:HGNC:16187]	chr20	760080	776015	-1	p13	SLC52A3	51.37	protein_coding	5984
0.001209	0.4	0.537	0.57	201583_s_at	ENSG00000101310	SEC23 homolog B, COPII coat complex component [Source:HGNC Symbol;Acc:HGNC:10702]	chr20	18507520	18561415	1	p11.23	SEC23B	42.97	protein_coding	4347
0.0049402	0.504	1.517	0.83	1559882_at	ENSG00000101347	SAM and HD domain containing deoxynucleoside triphosphate triphosphohydrolase 1 [Source:HGNC Symbol;Acc:HGNC:15925]	chr20	36890229	36951893	-1	q11.23	SAMHD1	43.83	protein_coding	10835
0.0014346	0.425	0.73	1.472	210103_s_at	ENSG00000125798	forkhead box A2 [Source:HGNC Symbol;Acc:HGNC:5022]	chr20	22580998	22585455	-1	p11.21	FOXA2	61.96	protein_coding	2719
0.0024639	0.484	0.738	1.461	40284_at	ENSG00000125798	forkhead box A2 [Source:HGNC Symbol;Acc:HGNC:5022]	chr20	22580998	22585455	-1	p11.21	FOXA2	61.96	protein_coding	2719
0.0081043	0.519	0.681	0.87	227752_at	ENSG00000172296	serine palmitoyltransferase long chain base subunit 3 [Source:HGNC Symbol;Acc:HGNC:16253]	chr20	13008972	13169103	1	p12.1	SPTLC3	39.89	protein_coding	8527
0.0006444	0.335	1.417	1.114	235368_at	ENSG00000154736	ADAM metallopeptidase with thrombospondin type 1 motif 5 [Source:HGNC Symbol;Acc:HGNC:221]	chr21	26917922	26967088	-1	q21.3	ADAMTS5	38.46	protein_coding	9765
0.0029142	0.498	1.349	1.141	229357_at	ENSG00000154736	ADAM metallopeptidase with thrombospondin type 1 motif 5 [Source:HGNC Symbol;Acc:HGNC:221]	chr21	26917922	26967088	-1	q21.3	ADAMTS5	38.46	protein_coding	9765
0.003061	0.498	1.323	1.252	219935_at	ENSG00000154736	ADAM metallopeptidase with thrombospondin type 1 motif 5 [Source:HGNC Symbol;Acc:HGNC:221]	chr21	26917922	26967088	-1	q21.3	ADAMTS5	38.46	protein_coding	9765
0.0044368	0.504	0.506	0.503	222492_at	ENSG00000160209	pyridoxal kinase [Source:HGNC Symbol;Acc:HGNC:8819]	chr21	43719094	43762307	1	q22.3	PDXK	57.26	protein_coding	11912
0.006298	0.519	0.667	0.849	221215_s_at	ENSG00000183421	receptor interacting serine/threonine kinase 4 [Source:HGNC Symbol;Acc:HGNC:496]	chr21	41739369	41767089	-1	q22.3	RIPK4	53.49	protein_coding	4016
0.0070257	0.519	0.527	0.528	213989_x_at	ENSG00000185917	SET domain containing 4 [Source:HGNC Symbol;Acc:HGNC:1258]	chr21	36034541	36079389	-1	q22.12	SETD4	44.84	protein_coding	7288
0.0025727	0.49	0.485	0.518	209103_s_at	ENSG00000070010	ubiquitin recognition factor in ER associated degradation 1 [Source:HGNC Symbol;Acc:HGNC:12520]	chr22	19449911	19479202	-1	q11.21	UFD1	46.94	protein_coding	8722
0.0048491	0.504	0.557	0.704	222583_s_at	ENSG00000093000	nucleoporin 50 [Source:HGNC Symbol;Acc:HGNC:8065]	chr22	45163925	45188017	1	q13.31	NUP50	43.51	protein_coding	8236
0.0092684	0.519	0.638	0.76	218294_s_at	ENSG00000093000	nucleoporin 50 [Source:HGNC Symbol;Acc:HGNC:8065]	chr22	45163925	45188017	1	q13.31	NUP50	43.51	protein_coding	8236
0.0058347	0.516	0.562	0.631	213682_at	ENSG00000093000	nucleoporin 50 [Source:HGNC Symbol;Acc:HGNC:8065]	chr22	45163925	45188017	1	q13.31	NUP50	43.51	protein_coding	8236
0.0042605	0.504	0.628	0.816	218295_s_at	ENSG00000093000	nucleoporin 50 [Source:HGNC Symbol;Acc:HGNC:8065]	chr22	45163925	45188017	1	q13.31	NUP50	43.51	protein_coding	8236
0.0042402	0.504	1.904	0.551	229721_x_at	ENSG00000099958	derlin 3 [Source:HGNC Symbol;Acc:HGNC:14236]	chr22	23834503	23839128	-1	q11.23	DERL3	61.13	protein_coding	3796
0.0089701	0.519	0.484	0.47	223664_x_at	ENSG00000099968	BCL2 like 13 [Source:HGNC Symbol;Acc:HGNC:17164]	chr22	17628855	17730855	1	q11.21	BCL2L13	42.8	protein_coding	7662
0.0010595	0.383	0.591	0.789	200670_at	ENSG00000100219	X-box binding protein 1 [Source:HGNC Symbol;Acc:HGNC:12801]	chr22	28794555	28800597	-1	q12.1	XBP1	44.93	protein_coding	3028
0.0044703	0.504	0.45	0.457	213132_s_at	ENSG00000100294	malonyl-CoA-acyl carrier protein transacylase [Source:HGNC Symbol;Acc:HGNC:29622]	chr22	43132209	43143398	-1	q13.2	MCAT	52.52	protein_coding	2389
0.0058445	0.516	0.605	0.693	204799_at	ENSG00000100426	zinc finger BED-type containing 4 [Source:HGNC Symbol;Acc:HGNC:20721]	chr22	49853844	49890080	1	q13.33	ZBED4	47.49	protein_coding	6893
0.0088278	0.519	0.662	0.769	218681_s_at	ENSG00000128228	stromal cell derived factor 2 like 1 [Source:HGNC Symbol;Acc:HGNC:10676]	chr22	21642302	21644299	1	q11.21	SDF2L1	62.21	protein_coding	1059
0.0098906	0.519	1.27	1.263	217258_x_at	ENSG00000211651	immunoglobulin lambda variable 1-44 [Source:HGNC Symbol;Acc:HGNC:5879]	chr22	22380766	22381347	1	q11.22	IGLV1-44	56.53	IG_V_gene	467
0.0096147	0.519	1.333	1.151	217227_x_at	ENSG00000211651	immunoglobulin lambda variable 1-44 [Source:HGNC Symbol;Acc:HGNC:5879]	chr22	22380766	22381347	1	q11.22	IGLV1-44	56.53	IG_V_gene	467
0.0071392	0.519	1.221	1.555	215214_at	ENSG00000211675	immunoglobulin lambda constant 1 [Source:HGNC Symbol;Acc:HGNC:5855]	chr22	22895375	22895834	1	q11.22	IGLC1	58.26	IG_C_gene	460
0.0051125	0.504	0.46	0.492	210286_s_at	ENSG00000033867	solute carrier family 4 member 7 [Source:HGNC Symbol;Acc:HGNC:11033]	chr3	27372721	27484420	-1	p24.1	SLC4A7	36.85	protein_coding	9616
0.0007136	0.335	1.576	0.922	218574_s_at	ENSG00000071282	LIM and cysteine rich domains 1 [Source:HGNC Symbol;Acc:HGNC:6633]	chr3	8501807	8574668	1	p25.3	LMCD1	43.85	protein_coding	9025
0.0060708	0.516	1.471	0.732	228693_at	ENSG00000152492	coiled-coil domain containing 50 [Source:HGNC Symbol;Acc:HGNC:18111]	chr3	191329085	191398659	1	q28	CCDC50	36.59	protein_coding	9183
0.0031685	0.498	0.607	0.72	222632_s_at	ENSG00000163818	leucine zipper transcription factor like 1 [Source:HGNC Symbol;Acc:HGNC:6741]	chr3	45823316	45916042	-1	p21.31	LZTFL1	42.03	protein_coding	7203
0.000165	0.256	1.985	0.746	228218_at	ENSG00000185565	limbic system associated membrane protein [Source:HGNC Symbol;Acc:HGNC:6705]	chr3	115802363	117139389	-1	q13.31	LSAMP	37.2	protein_coding	10286
0.0062171	0.518	1.353	1.21	227399_at	ENSG00000206538	vestigial like family member 3 [Source:HGNC Symbol;Acc:HGNC:24327]	chr3	86876388	86991149	-1	p12.1	VGLL3	36.27	protein_coding	12740
0.0060855	0.516	0.76	1.176	223611_s_at	ENSG00000072201	ligand of numb-protein X 1 [Source:HGNC Symbol;Acc:HGNC:6657]	chr4	53459301	53701405	-1	q12	LNX1	41.42	protein_coding	5624
0.0033641	0.503	0.572	0.654	1554260_a_at	ENSG00000075539	FRY like transcription coactivator [Source:HGNC Symbol;Acc:HGNC:29127]	chr4	48497357	48780322	-1	p11	FRYL	36.94	protein_coding	18165
0.009567	0.519	0.536	0.48	223010_s_at	ENSG00000109180	OCIA domain containing 1 [Source:HGNC Symbol;Acc:HGNC:16074]	chr4	48805212	48861817	1	p11	OCIAD1	39.5	protein_coding	4714
0.0019722	0.481	1.35	1.309	209897_s_at	ENSG00000145147	slit guidance ligand 2 [Source:HGNC Symbol;Acc:HGNC:11086]	chr4	20251905	20620561	1	p15.31	SLIT2	36.12	protein_coding	11067
0.0089734	0.519	1.256	1.504	230130_at	ENSG00000145147	slit guidance ligand 2 [Source:HGNC Symbol;Acc:HGNC:11086]	chr4	20251905	20620561	1	p15.31	SLIT2	36.12	protein_coding	11067
0.0053291	0.504	1.409	0.998	228850_s_at	ENSG00000145147	slit guidance ligand 2 [Source:HGNC Symbol;Acc:HGNC:11086]	chr4	20251905	20620561	1	p15.31	SLIT2	36.12	protein_coding	11067
0.0010805	0.384	1.385	1.233	204463_s_at	ENSG00000151617	endothelin receptor type A [Source:HGNC Symbol;Acc:HGNC:3179]	chr4	147480917	147544954	1	q31.22	EDNRA	38.78	protein_coding	4238
0.0055584	0.509	1.31	1.227	204464_s_at	ENSG00000151617	endothelin receptor type A [Source:HGNC Symbol;Acc:HGNC:3179]	chr4	147480917	147544954	1	q31.22	EDNRA	38.78	protein_coding	4238
0.0024578	0.484	1.576	0.806	216235_s_at	ENSG00000151617	endothelin receptor type A [Source:HGNC Symbol;Acc:HGNC:3179]	chr4	147480917	147544954	1	q31.22	EDNRA	38.78	protein_coding	4238
0.0018362	0.481	1.359	1.247	209621_s_at	ENSG00000154553	PDZ and LIM domain 3 [Source:HGNC Symbol;Acc:HGNC:20767]	chr4	185500660	185535507	-1	q35.1	PDLIM3	39.95	protein_coding	9012
8.69e-05	0.256	1.341	1.572	210170_at	ENSG00000154553	PDZ and LIM domain 3 [Source:HGNC Symbol;Acc:HGNC:20767]	chr4	185500660	185535507	-1	q35.1	PDLIM3	39.95	protein_coding	9012
0.009893	0.519	0.627	0.71	227220_at	ENSG00000170448	nuclear transcription factor, X-box binding like 1 [Source:HGNC Symbol;Acc:HGNC:18726]	chr4	47847233	47914667	-1	p12	NFXL1	35.55	protein_coding	4494
0.0093716	0.519	0.678	0.804	1553928_at	ENSG00000179387	ELMO domain containing 2 [Source:HGNC Symbol;Acc:HGNC:28111]	chr4	140524168	140553770	1	q31.1	ELMOD2	34.79	protein_coding	6617
0.0031671	0.498	0.658	0.907	229603_at	ENSG00000181004	Bardet-Biedl syndrome 12 [Source:HGNC Symbol;Acc:HGNC:26648]	chr4	122732702	122744942	1	q27	BBS12	39.69	protein_coding	3431
0.0001068	0.256	1.428	1.12	209613_s_at	ENSG00000196616	alcohol dehydrogenase 1B (class I), beta polypeptide [Source:HGNC Symbol;Acc:HGNC:250]	chr4	99304971	99352760	-1	q23	ADH1B	36.47	protein_coding	10770
0.0001482	0.256	1.446	1.167	209612_s_at	ENSG00000196616	alcohol dehydrogenase 1B (class I), beta polypeptide [Source:HGNC Symbol;Acc:HGNC:250]	chr4	99304971	99352760	-1	q23	ADH1B	36.47	protein_coding	10770
0.0046157	0.504	0.599	0.674	201823_s_at	ENSG00000013561	ring finger protein 14 [Source:HGNC Symbol;Acc:HGNC:10058]	chr5	141958328	141990292	1	q31.3	RNF14	42.05	protein_coding	4988
0.0092932	0.519	0.558	0.577	227447_at	ENSG00000039123	Mtr4 exosome RNA helicase [Source:HGNC Symbol;Acc:HGNC:18734]	chr5	55307989	55425579	1	q11.2	MTREX	36.82	protein_coding	6347
0.0019946	0.481	0.484	0.508	212896_at	ENSG00000039123	Mtr4 exosome RNA helicase [Source:HGNC Symbol;Acc:HGNC:18734]	chr5	55307989	55425579	1	q11.2	MTREX	36.82	protein_coding	6347
0.0021592	0.484	0.629	0.724	1558214_s_at	ENSG00000044115	catenin alpha 1 [Source:HGNC Symbol;Acc:HGNC:2509]	chr5	138610967	138935034	1	q31.2	CTNNA1	44.15	protein_coding	8830
0.0015129	0.442	0.505	0.629	213077_at	ENSG00000047188	YTH domain containing 2 [Source:HGNC Symbol;Acc:HGNC:24721]	chr5	113513694	113595285	1	q22.2	YTHDC2	34.67	protein_coding	10805
0.0031702	0.498	0.509	0.586	1554883_a_at	ENSG00000049167	ERCC excision repair 8, CSA ubiquitin ligase complex subunit [Source:HGNC Symbol;Acc:HGNC:3439]	chr5	60866454	60945073	-1	q12.1	ERCC8	37.18	protein_coding	26458
0.0005111	0.335	0.506	0.598	203086_at	ENSG00000068796	kinesin family member 2A [Source:HGNC Symbol;Acc:HGNC:6318]	chr5	62306162	62391025	1	q12.1	KIF2A	38.5	protein_coding	13050
0.0080946	0.519	0.705	0.903	225613_at	ENSG00000069020	microtubule associated serine/threonine kinase family member 4 [Source:HGNC Symbol;Acc:HGNC:19037]	chr5	66596361	67169595	1	q12.3	MAST4	39.2	protein_coding	14675
0.0083097	0.519	0.701	0.844	225611_at	ENSG00000069020	microtubule associated serine/threonine kinase family member 4 [Source:HGNC Symbol;Acc:HGNC:19037]	chr5	66596361	67169595	1	q12.3	MAST4	39.2	protein_coding	14675
5.62e-05	0.256	0.359	0.495	234304_s_at	ENSG00000086200	importin 11 [Source:HGNC Symbol;Acc:HGNC:20628]	chr5	62403972	62628582	1	q12.1	IPO11	38.3	protein_coding	7540
0.0041812	0.504	0.662	0.946	202539_s_at	ENSG00000113161	3-hydroxy-3-methylglutaryl-CoA reductase [Source:HGNC Symbol;Acc:HGNC:5006]	chr5	75336329	75364001	1	q13.3	HMGCR	38.36	protein_coding	10125
0.0094069	0.519	0.655	0.666	209349_at	ENSG00000113522	RAD50 double strand break repair protein [Source:HGNC Symbol;Acc:HGNC:9816]	chr5	132556019	132646349	1	q31.1	RAD50	38.81	protein_coding	10565
0.0083241	0.519	0.642	0.749	227771_at	ENSG00000113594	LIF receptor subunit alpha [Source:HGNC Symbol;Acc:HGNC:6597]	chr5	38474668	38608354	-1	p13.1	LIFR	39.44	protein_coding	12159
0.0007451	0.335	1.576	0.81	237292_at	ENSG00000113657	dihydropyrimidinase like 3 [Source:HGNC Symbol;Acc:HGNC:3015]	chr5	147390808	147510068	-1	q32	DPYSL3	41.44	protein_coding	7179
0.0068291	0.519	0.621	0.661	224577_at	ENSG00000113719	endoplasmic reticulum-golgi intermediate compartment 1 [Source:HGNC Symbol;Acc:HGNC:29205]	chr5	172834251	172952683	1	q35.1	ERGIC1	50.92	protein_coding	14161
0.0079877	0.519	0.605	0.596	223847_s_at	ENSG00000113719	endoplasmic reticulum-golgi intermediate compartment 1 [Source:HGNC Symbol;Acc:HGNC:29205]	chr5	172834251	172952683	1	q35.1	ERGIC1	50.92	protein_coding	14161
0.0084972	0.519	0.641	0.713	208853_s_at	ENSG00000127022	calnexin [Source:HGNC Symbol;Acc:HGNC:1473]	chr5	179678628	179731641	1	q35.3	CANX	45.64	protein_coding	13764
0.0088739	0.519	0.6	0.54	208872_s_at	ENSG00000129625	receptor accessory protein 5 [Source:HGNC Symbol;Acc:HGNC:30077]	chr5	112876385	112922289	-1	q22.2	REEP5	41.56	protein_coding	3974
0.0045088	0.504	0.504	0.486	201343_at	ENSG00000131508	ubiquitin conjugating enzyme E2 D2 [Source:HGNC Symbol;Acc:HGNC:12475]	chr5	139526431	139628434	1	q31.2	UBE2D2	44.35	protein_coding	3556
0.0064106	0.519	0.588	0.616	201345_s_at	ENSG00000131508	ubiquitin conjugating enzyme E2 D2 [Source:HGNC Symbol;Acc:HGNC:12475]	chr5	139526431	139628434	1	q31.2	UBE2D2	44.35	protein_coding	3556
0.008418	0.519	0.574	0.596	212195_at	ENSG00000134352	interleukin 6 signal transducer [Source:HGNC Symbol;Acc:HGNC:6021]	chr5	55935095	55995022	-1	q11.2	IL6ST	37.44	protein_coding	10117
0.0020113	0.481	0.572	0.646	212196_at	ENSG00000134352	interleukin 6 signal transducer [Source:HGNC Symbol;Acc:HGNC:6021]	chr5	55935095	55995022	-1	q11.2	IL6ST	37.44	protein_coding	10117
0.0016637	0.463	0.556	0.706	204864_s_at	ENSG00000134352	interleukin 6 signal transducer [Source:HGNC Symbol;Acc:HGNC:6021]	chr5	55935095	55995022	-1	q11.2	IL6ST	37.44	protein_coding	10117
0.0005641	0.335	0.432	0.53	209404_s_at	ENSG00000134970	transmembrane p24 trafficking protein 7 [Source:HGNC Symbol;Acc:HGNC:24253]	chr5	115613210	115632992	-1	q22.3	TMED7	37.81	protein_coding	4055
0.0047278	0.504	0.56	0.606	226180_at	ENSG00000134987	WD repeat domain 36 [Source:HGNC Symbol;Acc:HGNC:30696]	chr5	111091716	111130502	1	q22.1	WDR36	33.98	protein_coding	7656
0.0005546	0.335	0.493	0.557	1555334_s_at	ENSG00000145740	solute carrier family 30 member 5 [Source:HGNC Symbol;Acc:HGNC:19089]	chr5	69093949	69131069	1	q13.1	SLC30A5	39.23	protein_coding	5481
0.0010136	0.379	0.476	0.505	232432_s_at	ENSG00000145740	solute carrier family 30 member 5 [Source:HGNC Symbol;Acc:HGNC:19089]	chr5	69093949	69131069	1	q13.1	SLC30A5	39.23	protein_coding	5481
0.0078669	0.519	0.552	0.517	218989_x_at	ENSG00000145740	solute carrier family 30 member 5 [Source:HGNC Symbol;Acc:HGNC:19089]	chr5	69093949	69131069	1	q13.1	SLC30A5	39.23	protein_coding	5481
0.0077008	0.519	0.526	0.49	221257_x_at	ENSG00000145868	F-box protein 38 [Source:HGNC Symbol;Acc:HGNC:28844]	chr5	148383935	148442836	1	q32	FBXO38	37.05	protein_coding	8722
0.0003842	0.317	0.461	0.54	207196_s_at	ENSG00000145901	TNFAIP3 interacting protein 1 [Source:HGNC Symbol;Acc:HGNC:16903]	chr5	151029945	151093577	-1	q33.1	TNIP1	50.01	protein_coding	5793
0.0038619	0.504	0.506	0.535	241734_at	ENSG00000151304	serum response factor binding protein 1 [Source:HGNC Symbol;Acc:HGNC:26333]	chr5	121961975	122075570	1	q23.1	SRFBP1	36.16	protein_coding	3111
0.0023136	0.484	0.547	0.575	218472_s_at	ENSG00000152684	pelota mRNA surveillance and ribosome rescue factor [Source:HGNC Symbol;Acc:HGNC:8829]	chr5	52787916	52804044	1	q11.2	PELO	38.89	protein_coding	4371
0.0057484	0.515	0.467	0.427	205335_s_at	ENSG00000153037	signal recognition particle 19 [Source:HGNC Symbol;Acc:HGNC:11300]	chr5	112861188	112898371	1	q22.2	SRP19	41.89	protein_coding	10517
0.0006954	0.335	0.555	0.643	1552612_at	ENSG00000158985	CDC42 small effector 2 [Source:HGNC Symbol;Acc:HGNC:18547]	chr5	131245493	131398447	1	q31.1	CDC42SE2	39.71	protein_coding	6024
0.0066339	0.519	0.636	0.681	1552613_s_at	ENSG00000158985	CDC42 small effector 2 [Source:HGNC Symbol;Acc:HGNC:18547]	chr5	131245493	131398447	1	q31.1	CDC42SE2	39.71	protein_coding	6024
0.0039936	0.504	0.52	0.603	235615_at	ENSG00000164219	protein geranylgeranyltransferase type I subunit beta [Source:HGNC Symbol;Acc:HGNC:8895]	chr5	115204012	115262877	-1	q22.3	PGGT1B	35.39	protein_coding	10069
0.005105	0.504	0.609	0.714	231918_s_at	ENSG00000164347	GTP dependent ribosome recycling factor mitochondrial 2 [Source:HGNC Symbol;Acc:HGNC:29682]	chr5	74721206	74767147	-1	q13.3	GFM2	36.31	protein_coding	3971
0.0034145	0.503	0.547	0.579	200805_at	ENSG00000169223	lectin, mannose binding 2 [Source:HGNC Symbol;Acc:HGNC:16986]	chr5	177331567	177351668	-1	q35.3	LMAN2	50.4	protein_coding	2168
0.0050612	0.504	1.311	1.185	226789_at	ENSG00000170571	embigin [Source:HGNC Symbol;Acc:HGNC:30465]	chr5	50396192	50443248	-1	q11.1	EMB	36.85	protein_coding	5240
0.0077455	0.519	0.589	0.655	203791_at	ENSG00000172869	Dmx like 1 [Source:HGNC Symbol;Acc:HGNC:2937]	chr5	119037772	119249138	1	q23.1	DMXL1	37.58	protein_coding	13929
0.0023474	0.484	0.527	0.644	229082_at	ENSG00000183323	coiled-coil domain containing 125 [Source:HGNC Symbol;Acc:HGNC:28924]	chr5	69280175	69332809	-1	q13.2	CCDC125	43.76	protein_coding	7980
0.0071554	0.519	0.62	0.655	205074_at	ENSG00000197375	solute carrier family 22 member 5 [Source:HGNC Symbol;Acc:HGNC:10969]	chr5	132369710	132395613	1	q31.1	SLC22A5	48.37	protein_coding	12829
0.007883	0.519	0.613	0.683	221788_at	ENSG00000013375	phosphoglucomutase 3 [Source:HGNC Symbol;Acc:HGNC:8907]	chr6	83161150	83193936	-1	q14.1	PGM3	38.66	protein_coding	7478
0.0083108	0.519	0.646	0.72	239388_at	ENSG00000026297	ribonuclease T2 [Source:HGNC Symbol;Acc:HGNC:21686]	chr6	166922113	166957191	-1	q27	RNASET2	48.85	protein_coding	19532
0.0040688	0.504	2.382	0.437	235668_at	ENSG00000057657	PR/SET domain 1 [Source:HGNC Symbol;Acc:HGNC:9346]	chr6	105993463	106109939	1	q21	PRDM1	40.37	protein_coding	6750
0.00685	0.519	0.574	0.631	218024_at	ENSG00000060762	mitochondrial pyruvate carrier 1 [Source:HGNC Symbol;Acc:HGNC:21606]	chr6	166364919	166383013	-1	q27	MPC1	38.93	protein_coding	1546
0.0057161	0.515	1.598	0.612	230529_at	ENSG00000112406	hdc homolog, cell cycle regulator [Source:HGNC Symbol;Acc:HGNC:21041]	chr6	139135080	139180802	1	q24.1	HECA	41.8	protein_coding	5646
0.0045707	0.504	0.648	0.798	232591_s_at	ENSG00000112697	transmembrane protein 30A [Source:HGNC Symbol;Acc:HGNC:16667]	chr6	75252924	75284948	-1	q14.1	TMEM30A	37.36	protein_coding	5502
0.0097617	0.519	0.729	1.123	204875_s_at	ENSG00000112699	GDP-mannose 4,6-dehydratase [Source:HGNC Symbol;Acc:HGNC:4369]	chr6	1623806	2245605	-1	p25.3	GMDS	40.77	protein_coding	4217
0.0072238	0.519	0.613	0.668	211090_s_at	ENSG00000112739	pre-mRNA processing factor 4B [Source:HGNC Symbol;Acc:HGNC:17346]	chr6	4021267	4064983	1	p25.2	PRPF4B	38.36	protein_coding	8429
0.0079426	0.519	0.645	0.821	203814_s_at	ENSG00000124588	N-ribosyldihydronicotinamide:quinone reductase 2 [Source:HGNC Symbol;Acc:HGNC:7856]	chr6	2987987	3019755	1	p25.2	NQO2	46.72	protein_coding	2426
0.0094837	0.519	0.698	0.802	200890_s_at	ENSG00000124783	signal sequence receptor subunit 1 [Source:HGNC Symbol;Acc:HGNC:11323]	chr6	7268306	7347446	-1	p24.3	SSR1	43.56	protein_coding	11349
0.0020164	0.481	1.184	2.134	228186_s_at	ENSG00000146374	R-spondin 3 [Source:HGNC Symbol;Acc:HGNC:20866]	chr6	127118671	127199481	1	q22.33	RSPO3	36.02	protein_coding	4957
0.0020185	0.481	1.597	0.777	229088_at	ENSG00000197594	ectonucleotide pyrophosphatase/phosphodiesterase 1 [Source:HGNC Symbol;Acc:HGNC:3356]	chr6	131808016	131895155	1	q23.2	ENPP1	38.19	protein_coding	11423
0.0004811	0.335	1.516	1.035	205066_s_at	ENSG00000197594	ectonucleotide pyrophosphatase/phosphodiesterase 1 [Source:HGNC Symbol;Acc:HGNC:3356]	chr6	131808016	131895155	1	q23.2	ENPP1	38.19	protein_coding	11423
0.0003164	0.304	0.499	0.649	213292_s_at	ENSG00000071189	sorting nexin 13 [Source:HGNC Symbol;Acc:HGNC:21335]	chr7	17790761	17940501	-1	p21.1	SNX13	35.09	protein_coding	16418
0.007567	0.519	0.584	0.631	1553148_a_at	ENSG00000071189	sorting nexin 13 [Source:HGNC Symbol;Acc:HGNC:21335]	chr7	17790761	17940501	-1	p21.1	SNX13	35.09	protein_coding	16418
0.0066533	0.519	1.363	1.019	201272_at	ENSG00000085662	aldo-keto reductase family 1 member B [Source:HGNC Symbol;Acc:HGNC:381]	chr7	134442356	134459284	-1	q33	AKR1B1	50.04	protein_coding	3654
0.0047445	0.504	1.958	0.487	1565823_at	ENSG00000122545	septin 7 [Source:HGNC Symbol;Acc:HGNC:1717]	chr7	35800932	35907105	1	p14.2	SEPTIN7	36.13	protein_coding	17138
0.0097665	0.519	1.507	0.777	243084_at	ENSG00000122786	caldesmon 1 [Source:HGNC Symbol;Acc:HGNC:1441]	chr7	134744252	134970729	1	q33	CALD1	40.05	protein_coding	9844
0.0008113	0.335	1.627	0.805	215198_s_at	ENSG00000122786	caldesmon 1 [Source:HGNC Symbol;Acc:HGNC:1441]	chr7	134744252	134970729	1	q33	CALD1	40.05	protein_coding	9844
0.0047431	0.504	1.441	0.911	215199_at	ENSG00000122786	caldesmon 1 [Source:HGNC Symbol;Acc:HGNC:1441]	chr7	134744252	134970729	1	q33	CALD1	40.05	protein_coding	9844
0.0001587	0.256	2.08	0.7	235834_at	ENSG00000122786	caldesmon 1 [Source:HGNC Symbol;Acc:HGNC:1441]	chr7	134744252	134970729	1	q33	CALD1	40.05	protein_coding	9844
0.0084218	0.519	1.432	0.98	205525_at	ENSG00000122786	caldesmon 1 [Source:HGNC Symbol;Acc:HGNC:1441]	chr7	134744252	134970729	1	q33	CALD1	40.05	protein_coding	9844
0.0057468	0.515	0.646	0.777	209255_at	ENSG00000128607	kelch domain containing 10 [Source:HGNC Symbol;Acc:HGNC:22194]	chr7	130070534	130135705	1	q32.2	KLHDC10	40.13	protein_coding	6583
0.0071984	0.519	0.575	0.569	220261_s_at	ENSG00000136247	zinc finger DHHC-type palmitoyltransferase 4 [Source:HGNC Symbol;Acc:HGNC:18471]	chr7	6577434	6589374	1	p22.1	ZDHHC4	47.01	protein_coding	3557
0.0080106	0.519	0.577	0.565	1554761_a_at	ENSG00000164818	dynein axonemal assembly factor 5 [Source:HGNC Symbol;Acc:HGNC:26013]	chr7	726699	786475	1	p22.3	DNAAF5	53.29	protein_coding	7139
0.0042129	0.504	0.544	0.532	218460_at	ENSG00000164818	dynein axonemal assembly factor 5 [Source:HGNC Symbol;Acc:HGNC:26013]	chr7	726699	786475	1	p22.3	DNAAF5	53.29	protein_coding	7139
0.0076346	0.519	1.932	0.484	219815_at	ENSG00000197093	galactose-3-O-sulfotransferase 4 [Source:HGNC Symbol;Acc:HGNC:24145]	chr7	100159244	100168617	-1	q22.1	GAL3ST4	52.79	protein_coding	3264
0.0001678	0.256	1.766	0.844	227554_at	ENSG00000234456	MAGI2 antisense RNA 3 [Source:HGNC Symbol;Acc:HGNC:40862]	chr7	79452877	79471208	1	q21.11	MAGI2-AS3	38.5	lncRNA	17783
0.0053182	0.504	0.657	0.742	203207_s_at	ENSG00000066855	mitochondrial fission regulator 1 [Source:HGNC Symbol;Acc:HGNC:29510]	chr8	65644734	65771261	1	q13.1	MTFR1	40.22	protein_coding	4629
0.0086302	0.519	0.597	0.618	224744_at	ENSG00000104331	3'(2'), 5'-bisphosphate nucleotidase 2 [Source:HGNC Symbol;Acc:HGNC:26019]	chr8	56957931	56993867	-1	q12.1	BPNT2	38.23	protein_coding	7619
0.0034406	0.503	0.747	1.229	204595_s_at	ENSG00000159167	stanniocalcin 1 [Source:HGNC Symbol;Acc:HGNC:11373]	chr8	23841929	23854806	-1	p21.2	STC1	43.8	protein_coding	4134
0.0024845	0.484	0.756	1.234	204597_x_at	ENSG00000159167	stanniocalcin 1 [Source:HGNC Symbol;Acc:HGNC:11373]	chr8	23841929	23854806	-1	p21.2	STC1	43.8	protein_coding	4134
0.0048826	0.504	0.682	1.061	204596_s_at	ENSG00000159167	stanniocalcin 1 [Source:HGNC Symbol;Acc:HGNC:11373]	chr8	23841929	23854806	-1	p21.2	STC1	43.8	protein_coding	4134
0.000588	0.335	0.692	1.06	226803_at	ENSG00000164695	charged multivesicular body protein 4C [Source:HGNC Symbol;Acc:HGNC:30599]	chr8	81732448	81759515	1	q21.13	CHMP4C	38.06	protein_coding	1852
0.0085635	0.519	1.325	1.081	203548_s_at	ENSG00000175445	lipoprotein lipase [Source:HGNC Symbol;Acc:HGNC:6677]	chr8	19901717	19967259	1	p21.3	LPL	40.01	protein_coding	4131
0.0061708	0.516	0.663	0.807	203997_at	ENSG00000070159	protein tyrosine phosphatase non-receptor type 3 [Source:HGNC Symbol;Acc:HGNC:9655]	chr9	109375466	109498313	-1	q31.3	PTPN3	45.34	protein_coding	9995
0.0096531	0.519	0.604	0.684	242807_at	ENSG00000106701	fibronectin type III and SPRY domain containing 1 like [Source:HGNC Symbol;Acc:HGNC:13753]	chr9	105447796	105552433	1	q31.2	FSD1L	37.37	protein_coding	9877
0.0064351	0.519	1.245	1.604	219087_at	ENSG00000106819	asporin [Source:HGNC Symbol;Acc:HGNC:14872]	chr9	92456205	92482506	-1	q22.31	ASPN	38.34	protein_coding	2470
0.0061563	0.516	1.483	0.83	213306_at	ENSG00000107186	multiple PDZ domain crumbs cell polarity complex component [Source:HGNC Symbol;Acc:HGNC:7208]	chr9	13105706	13279692	-1	p23	MPDZ	35.84	protein_coding	11373
0.0052572	0.504	0.546	0.608	211475_s_at	ENSG00000107262	BAG cochaperone 1 [Source:HGNC Symbol;Acc:HGNC:937]	chr9	33247820	33264720	-1	p13.3	BAG1	46.54	protein_coding	7073
0.0064675	0.519	0.636	0.767	1557458_s_at	ENSG00000107338	SH2 domain containing adaptor protein B [Source:HGNC Symbol;Acc:HGNC:10838]	chr9	37915898	38069227	-1	p13.1	SHB	51	protein_coding	6035
0.004839	0.504	0.522	0.521	220285_at	ENSG00000107362	abhydrolase domain containing 17B, depalmitoylase [Source:HGNC Symbol;Acc:HGNC:24278]	chr9	71862452	71911193	-1	q21.13	ABHD17B	38.14	protein_coding	3221
0.0012907	0.404	0.501	0.614	202085_at	ENSG00000119139	tight junction protein 2 [Source:HGNC Symbol;Acc:HGNC:11828]	chr9	69121264	69274615	1	q21.11	TJP2	43.41	protein_coding	15243
0.0007594	0.335	1.51	0.859	209959_at	ENSG00000119508	nuclear receptor subfamily 4 group A member 3 [Source:HGNC Symbol;Acc:HGNC:7982]	chr9	99821855	99866891	1	q31.1	NR4A3	42.99	protein_coding	6314
0.0020817	0.483	1.69	0.66	204606_at	ENSG00000137077	C-C motif chemokine ligand 21 [Source:HGNC Symbol;Acc:HGNC:10620]	chr9	34709005	34710136	-1	p13.3	CCL21	59.1	protein_coding	936
0.0092694	0.519	1.422	0.987	226575_at	ENSG00000148143	zinc finger protein 462 [Source:HGNC Symbol;Acc:HGNC:21684]	chr9	106863166	107013634	1	q31.2	ZNF462	40.07	protein_coding	12190
0.0074636	0.519	0.611	0.611	223369_at	ENSG00000148335	N-terminal Xaa-Pro-Lys N-methyltransferase 1 [Source:HGNC Symbol;Acc:HGNC:23373]	chr9	129608884	129636135	1	q34.11	NTMT1	55.42	protein_coding	3033
0.0077355	0.519	0.692	0.833	212993_at	ENSG00000148411	NACC family member 2 [Source:HGNC Symbol;Acc:HGNC:23846]	chr9	136006537	136095289	-1	q34.3	NACC2	55.01	protein_coding	7216
0.0091886	0.519	0.686	0.88	59437_at	ENSG00000160345	chromosome 9 open reading frame 116 [Source:HGNC Symbol;Acc:HGNC:28435]	chr9	135495181	135501734	-1	q34.3	C9orf116	57.16	protein_coding	1864
0.0044518	0.504	0.605	0.782	221946_at	ENSG00000160345	chromosome 9 open reading frame 116 [Source:HGNC Symbol;Acc:HGNC:28435]	chr9	135495181	135501734	-1	q34.3	C9orf116	57.16	protein_coding	1864
0.0097204	0.519	0.502	0.477	205565_s_at	ENSG00000165060	frataxin [Source:HGNC Symbol;Acc:HGNC:3951]	chr9	69035751	69079076	1	q21.11	FXN	46.21	protein_coding	7261
0.0007055	0.335	0.474	0.585	235940_at	ENSG00000165118	chromosome 9 open reading frame 64 [Source:HGNC Symbol;Acc:HGNC:28144]	chr9	83938311	83956986	-1	q21.32	C9orf64	44.72	protein_coding	2754
0.0019323	0.481	0.463	0.491	203613_s_at	ENSG00000165264	NADH:ubiquinone oxidoreductase subunit B6 [Source:HGNC Symbol;Acc:HGNC:7701]	chr9	32553001	32573184	-1	p21.1	NDUFB6	41.42	protein_coding	1386
0.007241	0.519	1.388	0.947	229942_at	ENSG00000173068	basonuclin 2 [Source:HGNC Symbol;Acc:HGNC:30988]	chr9	16409503	16870843	-1	p22.2	BNC2	38.9	protein_coding	15323
0.0052096	0.504	1.281	1.43	238478_at	ENSG00000173068	basonuclin 2 [Source:HGNC Symbol;Acc:HGNC:30988]	chr9	16409503	16870843	-1	p22.2	BNC2	38.9	protein_coding	15323
0.0041023	0.504	1.363	1.159	220272_at	ENSG00000173068	basonuclin 2 [Source:HGNC Symbol;Acc:HGNC:30988]	chr9	16409503	16870843	-1	p22.2	BNC2	38.9	protein_coding	15323
0.005327	0.504	0.549	0.564	204071_s_at	ENSG00000197579	TOP1 binding arginine/serine rich protein, E3 ubiquitin ligase [Source:HGNC Symbol;Acc:HGNC:21653]	chr9	32540544	32552586	-1	p21.1	TOPORS	42.02	protein_coding	4131
0.0070172	0.519	0.581	0.669	227988_s_at	ENSG00000197969	vacuolar protein sorting 13 homolog A [Source:HGNC Symbol;Acc:HGNC:1908]	chr9	77177445	77421537	1	q21.2	VPS13A	35.88	protein_coding	20100
0.0075633	0.519	0.47	0.45	224899_s_at	ENSG00000102158	magnesium transporter 1 [Source:HGNC Symbol;Acc:HGNC:28880]	chrX	77825747	77895593	-1	q21.1	MAGT1	40.86	protein_coding	5479
0.0078729	0.519	1.417	0.86	210751_s_at	ENSG00000130988	regucalcin [Source:HGNC Symbol;Acc:HGNC:9989]	chrX	47078355	47093314	1	p11.3	RGN	43.38	protein_coding	2811
0.0032242	0.498	0.464	0.445	212342_at	ENSG00000181704	Yip1 domain family member 6 [Source:HGNC Symbol;Acc:HGNC:28304]	chrX	68498562	68537282	1	q12	YIPF6	41.2	protein_coding	8608
0.0048586	0.504	1.206	1.703	204584_at	ENSG00000198910	L1 cell adhesion molecule [Source:HGNC Symbol;Acc:HGNC:6470]	chrX	153861514	153886173	-1	q28	L1CAM	59.97	protein_coding	7269
0.0034178	0.503	0.59	0.626	201211_s_at	ENSG00000215301	DEAD-box helicase 3 X-linked [Source:HGNC Symbol;Acc:HGNC:2745]	chrX	41333348	41364472	1	p11.4	DDX3X	42.68	protein_coding	15828
0.0047226	0.504	0.561	0.558	217625_x_at	ENSG00000204054	Long intergenic non-protein coding RNA 963	chr9	129476946	129513687	1		LINC00963		lncRNA
0.0011745	0.398	1.959	0.594	1556183_at	ENSG00000291127	Ankyrin repeat domain 36B pseudogene 2	chr2	88765807	88806612	1		ANKRD36BP2		lncRNA

## Sheet: GSE26193 DFS
Parametric p-value	FDR	Hazard Ratio	SD of log intensities	ProbeSet	Gene_ID	Gene_description	Chromosome_scaffold_name	Gene_start_bp	Gene_end_bp	Strand	Karyotype_band	Gene_name	Gene_GC_content	Gene_type	Gene_Length
0.0058516	0.458	0.643	0.766	218164_at	ENSG00000006282	spermatogenesis associated 20 [Source:HGNC Symbol;Acc:HGNC:26125]	chr17	50543058	50555852	1	q21.33	SPATA20	57.05	protein_coding	5337
0.0088683	0.464	0.508	0.498	203106_s_at	ENSG00000006715	VPS41 subunit of HOPS complex [Source:HGNC Symbol;Acc:HGNC:12713]	chr7	38722974	38932394	-1	p14.1	VPS41	38.35	protein_coding	7752
0.0097505	0.474	1.843	0.496	230079_at	ENSG00000007341	suppression of tumorigenicity 7 like [Source:HGNC Symbol;Acc:HGNC:18441]	chr1	112523514	112620825	-1	p13.2	ST7L	39.05	protein_coding	8108
0.0023736	0.399	0.606	0.696	218686_s_at	ENSG00000007384	rhomboid 5 homolog 1 [Source:HGNC Symbol;Acc:HGNC:20561]	chr16	58059	76355	-1	p13.3	RHBDF1	61.15	protein_coding	4914
0.0037408	0.449	2.129	0.491	203297_s_at	ENSG00000008083	jumonji and AT-rich interaction domain containing 2 [Source:HGNC Symbol;Acc:HGNC:6196]	chr6	15246069	15522042	1	p22.3	JARID2	43.92	protein_coding	6244
0.0081023	0.458	1.66	0.641	216125_s_at	ENSG00000010017	RAN binding protein 9 [Source:HGNC Symbol;Acc:HGNC:13727]	chr6	13621498	13711835	-1	p23	RANBP9	37.08	protein_coding	3618
0.0071842	0.458	1.666	0.628	202583_s_at	ENSG00000010017	RAN binding protein 9 [Source:HGNC Symbol;Acc:HGNC:13727]	chr6	13621498	13711835	-1	p23	RANBP9	37.08	protein_coding	3618
0.0085224	0.459	0.497	0.518	203721_s_at	ENSG00000011260	UTP18 small subunit processome component [Source:HGNC Symbol;Acc:HGNC:24274]	chr17	51260546	51297936	1	q21.33	UTP18	40.36	protein_coding	2703
0.0097386	0.474	0.529	0.477	217964_at	ENSG00000011295	tetratricopeptide repeat domain 19 [Source:HGNC Symbol;Acc:HGNC:26006]	chr17	15999784	16045015	1	p12	TTC19	40.8	protein_coding	6054
0.0080545	0.458	2.102	0.449	217349_s_at	ENSG00000012211	prickle planar cell polarity protein 3 [Source:HGNC Symbol;Acc:HGNC:6645]	chrX	49174802	49186528	-1	p11.23	PRICKLE3	55.64	protein_coding	3656
0.003824	0.449	0.757	1.448	219115_s_at	ENSG00000016402	interleukin 20 receptor subunit alpha [Source:HGNC Symbol;Acc:HGNC:6003]	chr6	136999971	137045180	-1	q23.3	IL20RA	41.2	protein_coding	4730
0.0079522	0.458	1.511	0.642	209556_at	ENSG00000020129	neurochondrin [Source:HGNC Symbol;Acc:HGNC:17597]	chr1	35557473	35567274	1	p34.3	NCDN	57.71	protein_coding	4917
0.0020017	0.395	1.469	0.903	235545_at	ENSG00000024526	DEP domain containing 1 [Source:HGNC Symbol;Acc:HGNC:22949]	chr1	68474152	68497221	-1	p31.3	DEPDC1	34.94	protein_coding	5904
0.0077688	0.458	1.373	0.997	222958_s_at	ENSG00000024526	DEP domain containing 1 [Source:HGNC Symbol;Acc:HGNC:22949]	chr1	68474152	68497221	-1	p31.3	DEPDC1	34.94	protein_coding	5904
0.0066216	0.458	1.938	0.472	209422_at	ENSG00000025293	PHD finger protein 20 [Source:HGNC Symbol;Acc:HGNC:16098]	chr20	35771974	35950370	1	q11.22	PHF20	44.08	protein_coding	8372
0.0026367	0.408	1.853	0.569	231837_at	ENSG00000048028	ubiquitin specific peptidase 28 [Source:HGNC Symbol;Acc:HGNC:12625]	chr11	113797874	113875570	-1	q23.2	USP28	41.45	protein_coding	5719
0.006486	0.458	1.518	0.825	227451_s_at	ENSG00000050393	mitochondrial calcium uniporter regulator 1 [Source:HGNC Symbol;Acc:HGNC:21097]	chr6	13786557	13814568	-1	p23	MCUR1	41.24	protein_coding	6057
0.0004532	0.301	1.709	0.787	220094_s_at	ENSG00000050393	mitochondrial calcium uniporter regulator 1 [Source:HGNC Symbol;Acc:HGNC:21097]	chr6	13786557	13814568	-1	p23	MCUR1	41.24	protein_coding	6057
0.0061008	0.458	1.271	1.355	229168_at	ENSG00000050767	collagen type XXIII alpha 1 chain [Source:HGNC Symbol;Acc:HGNC:22990]	chr5	178237476	178590393	-1	q35.3	COL23A1	50.61	protein_coding	4359
0.0005157	0.301	2.073	0.603	219510_at	ENSG00000051341	DNA polymerase theta [Source:HGNC Symbol;Acc:HGNC:9186]	chr3	121431431	121545988	-1	q13.33	POLQ	39.03	protein_coding	9185
0.0035468	0.449	1.449	0.976	207746_at	ENSG00000051341	DNA polymerase theta [Source:HGNC Symbol;Acc:HGNC:9186]	chr3	121431431	121545988	-1	q13.33	POLQ	39.03	protein_coding	9185
0.0024293	0.399	2.176	0.47	222531_s_at	ENSG00000053770	adaptor related protein complex 5 subunit mu 1 [Source:HGNC Symbol;Acc:HGNC:20192]	chr14	57268924	57298742	1	q22.3	AP5M1	35.15	protein_coding	13019
0.0066565	0.458	1.742	0.582	218139_s_at	ENSG00000053770	adaptor related protein complex 5 subunit mu 1 [Source:HGNC Symbol;Acc:HGNC:20192]	chr14	57268924	57298742	1	q22.3	AP5M1	35.15	protein_coding	13019
0.0091788	0.468	1.67	0.596	1554557_at	ENSG00000058063	ATPase phospholipid transporting 11B (putative) [Source:HGNC Symbol;Acc:HGNC:13553]	chr3	182793503	182921629	1	q26.33	ATP11B	36.02	protein_coding	9187
0.0052259	0.458	1.473	0.906	218073_s_at	ENSG00000058804	NDC1 transmembrane nucleoporin [Source:HGNC Symbol;Acc:HGNC:25525]	chr1	53765478	53838463	-1	p32.3	NDC1	40.2	protein_coding	4720
0.008963	0.464	0.578	0.551	202629_at	ENSG00000062725	amyloid beta precursor protein binding protein 2 [Source:HGNC Symbol;Acc:HGNC:622]	chr17	60443158	60526242	-1	q23.2	APPBP2	39.71	protein_coding	9890
0.0062907	0.458	0.593	0.554	203266_s_at	ENSG00000065559	mitogen-activated protein kinase kinase 4 [Source:HGNC Symbol;Acc:HGNC:6844]	chr17	12020829	12143830	1	p12	MAP2K4	37.09	protein_coding	5709
0.0053802	0.458	1.208	1.694	215692_s_at	ENSG00000066382	metallophosphoesterase domain containing 2 [Source:HGNC Symbol;Acc:HGNC:1180]	chr11	30384493	30586872	-1	p14.1	MPPED2	40.01	protein_coding	8114
0.0054358	0.458	0.737	1.219	242064_at	ENSG00000069188	sidekick cell adhesion molecule 2 [Source:HGNC Symbol;Acc:HGNC:19308]	chr17	73334384	73644445	-1	q25.1	SDK2	52.32	protein_coding	11963
0.0008946	0.325	0.566	0.703	218181_s_at	ENSG00000071054	mitogen-activated protein kinase kinase kinase kinase 4 [Source:HGNC Symbol;Acc:HGNC:6866]	chr2	101696850	101894689	1	q11.2	MAP4K4	41.04	protein_coding	11961
0.0094159	0.469	0.653	0.732	227031_at	ENSG00000071189	sorting nexin 13 [Source:HGNC Symbol;Acc:HGNC:21335]	chr7	17790761	17940501	-1	p21.1	SNX13	35.09	protein_coding	16418
0.0058975	0.458	1.475	0.889	204033_at	ENSG00000071539	thyroid hormone receptor interactor 13 [Source:HGNC Symbol;Acc:HGNC:12307]	chr5	892884	919357	1	p15.33	TRIP13	50.22	protein_coding	3319
0.0039407	0.449	1.375	1.087	207165_at	ENSG00000072571	hyaluronan mediated motility receptor [Source:HGNC Symbol;Acc:HGNC:5012]	chr5	163460203	163491941	1	q34	HMMR	36.97	protein_coding	3932
0.0036523	0.449	1.379	1.057	209709_s_at	ENSG00000072571	hyaluronan mediated motility receptor [Source:HGNC Symbol;Acc:HGNC:5012]	chr5	163460203	163491941	1	q34	HMMR	36.97	protein_coding	3932
0.0040154	0.449	2.06	0.532	201093_x_at	ENSG00000073578	succinate dehydrogenase complex flavoprotein subunit A [Source:HGNC Symbol;Acc:HGNC:10680]	chr5	218241	257082	1	p15.33	SDHA	46.02	protein_coding	8765
0.0080716	0.458	0.651	0.762	207034_s_at	ENSG00000074047	GLI family zinc finger 2 [Source:HGNC Symbol;Acc:HGNC:4318]	chr2	120735623	120992653	1	q14.2	GLI2	52.42	protein_coding	7720
0.0080651	0.458	1.492	0.859	218870_at	ENSG00000075884	Rho GTPase activating protein 15 [Source:HGNC Symbol;Acc:HGNC:21030]	chr2	143091362	143768352	1	q22.2	ARHGAP15	36.48	protein_coding	6127
0.0068431	0.458	0.511	0.472	214265_at	ENSG00000077943	integrin subunit alpha 8 [Source:HGNC Symbol;Acc:HGNC:6144]	chr10	15513954	15719922	-1	p13	ITGA8	39.98	protein_coding	7320
3.7e-06	0.0789	3.085	0.545	233780_at	ENSG00000080345	replication timing regulatory factor 1 [Source:HGNC Symbol;Acc:HGNC:23207]	chr2	151409883	151508013	1	q23.3	RIF1	38.04	protein_coding	18166
0.0014796	0.364	0.564	0.632	204063_s_at	ENSG00000083290	unc-51 like autophagy activating kinase 2 [Source:HGNC Symbol;Acc:HGNC:13480]	chr17	19770829	19867936	-1	p11.2	ULK2	41.45	protein_coding	9868
0.0016368	0.38	2.025	0.577	224206_x_at	ENSG00000085274	myoneurin [Source:HGNC Symbol;Acc:HGNC:14955]	chr3	169773396	169789716	1	q26.2	MYNN	36.36	protein_coding	5165
0.0056962	0.458	1.943	0.53	218926_at	ENSG00000085274	myoneurin [Source:HGNC Symbol;Acc:HGNC:14955]	chr3	169773396	169789716	1	q26.2	MYNN	36.36	protein_coding	5165
0.0058009	0.458	1.333	1.135	229276_at	ENSG00000085552	immunoglobulin superfamily member 9 [Source:HGNC Symbol;Acc:HGNC:18132]	chr1	159927039	159945613	-1	q23.2	IGSF9	55.8	protein_coding	6637
0.0082204	0.458	1.233	1.384	214157_at	ENSG00000087460	GNAS complex locus [Source:HGNC Symbol;Acc:HGNC:4392]	chr20	58839718	58911192	1	q13.32	GNAS	47.09	protein_coding	22221
0.0037359	0.449	0.673	1.048	227949_at	ENSG00000087495	phosphatase and actin regulator 3 [Source:HGNC Symbol;Acc:HGNC:15833]	chr20	59577509	59847711	1	q13.32	PHACTR3	47.63	protein_coding	6103
0.002347	0.399	1.578	0.819	204447_at	ENSG00000088899	leucine zipper tumor suppressor family member 3 [Source:HGNC Symbol;Acc:HGNC:30139]	chr20	3162617	3173549	-1	p13	LZTS3	59.3	protein_coding	5352
0.0027182	0.412	0.439	0.468	214167_s_at	ENSG00000089157	ribosomal protein lateral stalk subunit P0 [Source:HGNC Symbol;Acc:HGNC:10371]	chr12	120196699	120201235	-1	q24.23	RPLP0	48.95	protein_coding	3988
0.0096532	0.474	1.925	0.509	225925_s_at	ENSG00000090686	ubiquitin specific peptidase 48 [Source:HGNC Symbol;Acc:HGNC:18533]	chr1	21678298	21783606	-1	p36.12	USP48	41.84	protein_coding	9497
0.0070452	0.458	1.916	0.517	217448_s_at	ENSG00000092203	TOX high mobility group box family member 4 [Source:HGNC Symbol;Acc:HGNC:20161]	chr14	21476597	21499175	1	q11.2	TOX4	43.81	protein_coding	7091
0.0080468	0.458	1.636	0.659	205063_at	ENSG00000092208	gem nuclear organelle associated protein 2 [Source:HGNC Symbol;Acc:HGNC:10884]	chr14	39114285	39136973	1	q21.1	GEMIN2	39.61	protein_coding	2695
0.0077284	0.458	0.481	0.501	202807_s_at	ENSG00000100284	target of myb1 membrane trafficking protein [Source:HGNC Symbol;Acc:HGNC:11982]	chr22	35299275	35347992	1	q12.3	TOM1	53.52	protein_coding	5869
0.0022527	0.399	1.519	0.964	209714_s_at	ENSG00000100526	cyclin dependent kinase inhibitor 3 [Source:HGNC Symbol;Acc:HGNC:1791]	chr14	54396849	54420218	1	q22.2	CDKN3	40.35	protein_coding	1836
0.0024502	0.399	1.488	1.018	1555758_a_at	ENSG00000100526	cyclin dependent kinase inhibitor 3 [Source:HGNC Symbol;Acc:HGNC:1791]	chr14	54396849	54420218	1	q22.2	CDKN3	40.35	protein_coding	1836
0.0067856	0.458	1.855	0.552	213046_at	ENSG00000100836	poly(A) binding protein nuclear 1 [Source:HGNC Symbol;Acc:HGNC:8565]	chr14	23321457	23326163	1	q11.2	PABPN1	50.18	protein_coding	3686
0.0079651	0.458	1.758	0.583	1552627_a_at	ENSG00000100852	Rho GTPase activating protein 5 [Source:HGNC Symbol;Acc:HGNC:675]	chr14	32076114	32159728	1	q12	ARHGAP5	36.95	protein_coding	10888
0.0011617	0.325	2.221	0.502	244795_at	ENSG00000101019	ubiquinol-cytochrome c reductase complex assembly factor 1 [Source:HGNC Symbol;Acc:HGNC:15891]	chr20	35302566	35412031	-1	q11.22	UQCC1	43	protein_coding	6672
0.001141	0.325	2.254	0.509	221082_s_at	ENSG00000101079	NDRG family member 3 [Source:HGNC Symbol;Acc:HGNC:14462]	chr20	36651766	36746090	-1	q11.23	NDRG3	44.5	protein_coding	3260
0.008282	0.458	1.834	0.541	224376_s_at	ENSG00000101084	RAB5 interacting factor [Source:HGNC Symbol;Acc:HGNC:15870]	chr20	36605779	36612557	1	q11.23	RAB5IF	49.02	protein_coding	1504
0.0050397	0.458	2.023	0.517	223880_x_at	ENSG00000101084	RAB5 interacting factor [Source:HGNC Symbol;Acc:HGNC:15870]	chr20	36605779	36612557	1	q11.23	RAB5IF	49.02	protein_coding	1504
0.0071851	0.458	1.967	0.515	217835_x_at	ENSG00000101084	RAB5 interacting factor [Source:HGNC Symbol;Acc:HGNC:15870]	chr20	36605779	36612557	1	q11.23	RAB5IF	49.02	protein_coding	1504
0.0032616	0.443	1.612	0.845	41577_at	ENSG00000101445	protein phosphatase 1 regulatory subunit 16B [Source:HGNC Symbol;Acc:HGNC:15850]	chr20	38805697	38923024	1	q11.23	PPP1R16B	47.52	protein_coding	6408
0.0038832	0.449	1.42	1.078	225687_at	ENSG00000101447	family with sequence similarity 83 member D [Source:HGNC Symbol;Acc:HGNC:16122]	chr20	38926312	38953106	1	q11.23	FAM83D	46.5	protein_coding	2475
0.0001971	0.263	0.592	1.002	206696_at	ENSG00000101850	G protein-coupled receptor 143 [Source:HGNC Symbol;Acc:HGNC:20145]	chrX	9725346	9786297	-1	p22.2	GPR143	47.19	protein_coding	2369
0.0019644	0.392	1.628	0.778	214804_at	ENSG00000102384	centromere protein I [Source:HGNC Symbol;Acc:HGNC:3968]	chrX	101098188	101166126	1	q22.1	CENPI	40.6	protein_coding	6981
0.0010832	0.325	1.593	0.72	207302_at	ENSG00000102683	sarcoglycan gamma [Source:HGNC Symbol;Acc:HGNC:10809]	chr13	23180979	23325162	1	q12.12	SGCG	39.23	protein_coding	1594
0.0027719	0.412	0.452	0.521	224984_at	ENSG00000102908	nuclear factor of activated T cells 5 [Source:HGNC Symbol;Acc:HGNC:7774]	chr16	69565094	69704666	1	q22.1	NFAT5	38.64	protein_coding	16401
0.008713	0.464	0.76	1.126	201195_s_at	ENSG00000103257	solute carrier family 7 member 5 [Source:HGNC Symbol;Acc:HGNC:11063]	chr16	87830023	87869507	-1	q24.2	SLC7A5	58.42	protein_coding	4764
0.0038457	0.449	0.51	0.48	219838_at	ENSG00000103852	tetratricopeptide repeat domain 23 [Source:HGNC Symbol;Acc:HGNC:25730]	chr15	99136323	99251223	-1	q26.3	TTC23	41.8	protein_coding	6148
0.0082969	0.458	1.457	0.756	202868_s_at	ENSG00000105171	POP4 homolog, ribonuclease P/MRP subunit [Source:HGNC Symbol;Acc:HGNC:30081]	chr19	29606283	29617237	1	q12	POP4	50.37	protein_coding	4308
0.0054855	0.458	1.598	0.716	214173_x_at	ENSG00000105176	URI1 prefoldin like chaperone [Source:HGNC Symbol;Acc:HGNC:13236]	chr19	29923644	30016612	1	q12	URI1	37.88	protein_coding	5448
0.0059099	0.458	0.655	0.787	204202_at	ENSG00000106012	IQ motif containing E [Source:HGNC Symbol;Acc:HGNC:29171]	chr7	2558972	2614733	1	p22.3	IQCE	52.81	protein_coding	9239
0.0087011	0.464	0.683	0.818	203771_s_at	ENSG00000106605	biliverdin reductase A [Source:HGNC Symbol;Acc:HGNC:1062]	chr7	43758680	43807342	1	p13	BLVRA	44.31	protein_coding	1821
0.0069266	0.458	0.638	0.71	211729_x_at	ENSG00000106605	biliverdin reductase A [Source:HGNC Symbol;Acc:HGNC:1062]	chr7	43758680	43807342	1	p13	BLVRA	44.31	protein_coding	1821
0.0092893	0.468	0.656	0.711	203773_x_at	ENSG00000106605	biliverdin reductase A [Source:HGNC Symbol;Acc:HGNC:1062]	chr7	43758680	43807342	1	p13	BLVRA	44.31	protein_coding	1821
0.0062069	0.458	1.806	0.598	1555780_a_at	ENSG00000106615	Ras homolog, mTORC1 binding [Source:HGNC Symbol;Acc:HGNC:10011]	chr7	151466012	151520120	-1	q36.1	RHEB	42	protein_coding	3533
0.0046308	0.458	1.918	0.554	213404_s_at	ENSG00000106615	Ras homolog, mTORC1 binding [Source:HGNC Symbol;Acc:HGNC:10011]	chr7	151466012	151520120	-1	q36.1	RHEB	42	protein_coding	3533
0.0030006	0.441	0.478	0.532	202441_at	ENSG00000107566	ER lipid raft associated 1 [Source:HGNC Symbol;Acc:HGNC:16947]	chr10	100150094	100186033	-1	q24.31	ERLIN1	38.15	protein_coding	3491
0.004444	0.456	1.934	0.544	208952_s_at	ENSG00000107929	La ribonucleoprotein 4B [Source:HGNC Symbol;Acc:HGNC:28987]	chr10	806914	931705	-1	p15.3	LARP4B	42.7	protein_coding	11610
0.0007208	0.325	2.099	0.61	218238_at	ENSG00000107937	GTP binding protein 4 [Source:HGNC Symbol;Acc:HGNC:21535]	chr10	988434	1019932	1	p15.3	GTPBP4	46.88	protein_coding	6121
0.0007499	0.325	2.13	0.588	218239_s_at	ENSG00000107937	GTP binding protein 4 [Source:HGNC Symbol;Acc:HGNC:21535]	chr10	988434	1019932	1	p15.3	GTPBP4	46.88	protein_coding	6121
0.0058123	0.458	1.98	0.521	222794_x_at	ENSG00000107951	mitochondrial poly(A) polymerase [Source:HGNC Symbol;Acc:HGNC:25532]	chr10	30309801	30374448	-1	p11.23	MTPAP	43.36	protein_coding	8341
0.0042805	0.454	2.093	0.5	218947_s_at	ENSG00000107951	mitochondrial poly(A) polymerase [Source:HGNC Symbol;Acc:HGNC:25532]	chr10	30309801	30374448	-1	p11.23	MTPAP	43.36	protein_coding	8341
0.0056075	0.458	1.998	0.513	218331_s_at	ENSG00000108021	transcription activation suppressor family member 2 [Source:HGNC Symbol;Acc:HGNC:23484]	chr10	5684838	5763740	1	p15.1	TASOR2	38.83	protein_coding	10960
0.0046878	0.458	0.5	0.564	226842_at	ENSG00000108306	F-box and leucine rich repeat protein 20 [Source:HGNC Symbol;Acc:HGNC:24679]	chr17	39252663	39402523	-1	q12	FBXL20	43.28	protein_coding	11053
0.006265	0.458	1.838	0.519	200054_at	ENSG00000109917	ZPR1 zinc finger [Source:HGNC Symbol;Acc:HGNC:13051]	chr11	116773799	116788039	-1	q23.3	ZPR1	44.5	protein_coding	7058
0.0031972	0.443	2.08	0.491	223128_at	ENSG00000110074	FAD dependent oxidoreductase domain containing 1 [Source:HGNC Symbol;Acc:HGNC:26927]	chr11	126269055	126278131	1	q24.2	FOXRED1	51.05	protein_coding	5657
0.0075491	0.458	1.911	0.471	204251_s_at	ENSG00000110274	centrosomal protein 164 [Source:HGNC Symbol;Acc:HGNC:29182]	chr11	117314557	117413266	1	q23.3	CEP164	47.97	protein_coding	12896
0.0078203	0.458	0.578	0.505	227993_at	ENSG00000111142	methionyl aminopeptidase 2 [Source:HGNC Symbol;Acc:HGNC:16672]	chr12	95473520	95515839	1	q22	METAP2	39.23	protein_coding	4491
0.0077408	0.458	1.638	0.661	218894_s_at	ENSG00000111196	mago homolog B, exon junction complex subunit [Source:HGNC Symbol;Acc:HGNC:25504]	chr12	10604193	10613609	-1	p13.2	MAGOHB	36.39	protein_coding	4839
0.0008534	0.325	1.466	1.198	204822_at	ENSG00000112742	TTK protein kinase [Source:HGNC Symbol;Acc:HGNC:12401]	chr6	80003887	80042527	1	q14.1	TTK	34.98	protein_coding	4579
0.0004186	0.291	2.376	0.582	224587_at	ENSG00000113387	SUB1 regulator of transcription [Source:HGNC Symbol;Acc:HGNC:19985]	chr5	32531633	32604079	1	p13.3	SUB1	42.87	protein_coding	9266
8.6e-06	0.0917	2.86	0.536	214512_s_at	ENSG00000113387	SUB1 regulator of transcription [Source:HGNC Symbol;Acc:HGNC:19985]	chr5	32531633	32604079	1	p13.3	SUB1	42.87	protein_coding	9266
0.0052059	0.458	1.835	0.571	224345_x_at	ENSG00000114023	family with sequence similarity 162 member A [Source:HGNC Symbol;Acc:HGNC:17865]	chr3	122384176	122412334	1	q21.1	FAM162A	38.78	protein_coding	3793
0.0048312	0.458	1.85	0.57	223193_x_at	ENSG00000114023	family with sequence similarity 162 member A [Source:HGNC Symbol;Acc:HGNC:17865]	chr3	122384176	122412334	1	q21.1	FAM162A	38.78	protein_coding	3793
0.0041369	0.454	1.981	0.525	220942_x_at	ENSG00000114023	family with sequence similarity 162 member A [Source:HGNC Symbol;Acc:HGNC:17865]	chr3	122384176	122412334	1	q21.1	FAM162A	38.78	protein_coding	3793
0.0031207	0.443	2.209	0.48	210907_s_at	ENSG00000114209	programmed cell death 10 [Source:HGNC Symbol;Acc:HGNC:8761]	chr3	167683298	167734939	-1	q26.1	PDCD10	35.73	protein_coding	3275
0.0077713	0.458	0.728	1.132	203394_s_at	ENSG00000114315	hes family bHLH transcription factor 1 [Source:HGNC Symbol;Acc:HGNC:5192]	chr3	194136148	194138732	1	q29	HES1	53.35	protein_coding	2059
0.006992	0.458	1.719	0.769	212476_at	ENSG00000114331	ArfGAP with coiled-coil, ankyrin repeat and PH domains 2 [Source:HGNC Symbol;Acc:HGNC:16469]	chr3	195274745	195443044	-1	q29	ACAP2	38.17	protein_coding	11096
9.94e-05	0.236	2.03	0.72	1552472_a_at	ENSG00000114331	ArfGAP with coiled-coil, ankyrin repeat and PH domains 2 [Source:HGNC Symbol;Acc:HGNC:16469]	chr3	195274745	195443044	-1	q29	ACAP2	38.17	protein_coding	11096
0.0089171	0.464	1.497	0.869	219787_s_at	ENSG00000114346	epithelial cell transforming 2 [Source:HGNC Symbol;Acc:HGNC:3155]	chr3	172750682	172821474	1	q26.31	ECT2	34.96	protein_coding	5499
0.004262	0.454	1.936	0.504	202706_s_at	ENSG00000114491	uridine monophosphate synthetase [Source:HGNC Symbol;Acc:HGNC:12563]	chr3	124730433	124749273	1	q21.2	UMPS	42.69	protein_coding	7512
0.0041048	0.454	1.682	0.674	242088_at	ENSG00000114796	kelch like family member 24 [Source:HGNC Symbol;Acc:HGNC:25947]	chr3	183635610	183684519	1	q27.1	KLHL24	38.98	protein_coding	8650
0.0089163	0.464	1.53	0.858	226158_at	ENSG00000114796	kelch like family member 24 [Source:HGNC Symbol;Acc:HGNC:25947]	chr3	183635610	183684519	1	q27.1	KLHL24	38.98	protein_coding	8650
0.0051642	0.458	0.575	0.654	224837_at	ENSG00000114861	forkhead box P1 [Source:HGNC Symbol;Acc:HGNC:3823]	chr3	70954708	71583989	-1	p13	FOXP1	41.11	protein_coding	34819
0.0082688	0.458	1.481	0.827	225447_at	ENSG00000115159	glycerol-3-phosphate dehydrogenase 2 [Source:HGNC Symbol;Acc:HGNC:4456]	chr2	156435290	156613735	1	q24.1	GPD2	37.9	protein_coding	7165
0.0032622	0.443	1.6	0.752	210007_s_at	ENSG00000115159	glycerol-3-phosphate dehydrogenase 2 [Source:HGNC Symbol;Acc:HGNC:4456]	chr2	156435290	156613735	1	q24.1	GPD2	37.9	protein_coding	7165
0.0066563	0.458	0.779	1.414	205174_s_at	ENSG00000115828	glutaminyl-peptide cyclotransferase [Source:HGNC Symbol;Acc:HGNC:9753]	chr2	37342827	37373322	1	p22.2	QPCT	41.29	protein_coding	2676
0.0008516	0.325	2.182	0.512	203310_at	ENSG00000116266	syntaxin binding protein 3 [Source:HGNC Symbol;Acc:HGNC:11446]	chr1	108746674	108809523	1	p13.3	STXBP3	36.04	protein_coding	5892
0.0002937	0.274	1.989	0.62	201420_s_at	ENSG00000116455	WD repeat domain 77 [Source:HGNC Symbol;Acc:HGNC:29652]	chr1	111439890	111449256	-1	p13.2	WDR77	44.39	protein_coding	2685
0.0060579	0.458	1.697	0.636	204407_at	ENSG00000116830	transcription termination factor 2 [Source:HGNC Symbol;Acc:HGNC:12398]	chr1	117060326	117107453	1	p13.1	TTF2	41.15	protein_coding	10158
0.0022762	0.399	2.301	0.457	218712_at	ENSG00000116922	chromosome 1 open reading frame 109 [Source:HGNC Symbol;Acc:HGNC:26039]	chr1	37681570	37692249	-1	p34.3	C1orf109	48.39	protein_coding	4443
0.0071114	0.458	1.311	1.276	214058_at	ENSG00000116990	MYCL proto-oncogene, bHLH transcription factor [Source:HGNC Symbol;Acc:HGNC:7555]	chr1	39895426	39902256	-1	p34.2	MYCL	53.68	protein_coding	5063
0.0062472	0.458	0.645	0.785	218918_at	ENSG00000117643	mannosidase alpha class 1C member 1 [Source:HGNC Symbol;Acc:HGNC:19080]	chr1	25616791	25786206	1	p36.11	MAN1C1	48.63	protein_coding	9702
0.000798	0.325	1.237	1.851	204450_x_at	ENSG00000118137	apolipoprotein A1 [Source:HGNC Symbol;Acc:HGNC:600]	chr11	116835751	116837622	-1	q23.3	APOA1	62.61	protein_coding	1096
0.0021868	0.399	1.221	1.836	217073_x_at	ENSG00000118137	apolipoprotein A1 [Source:HGNC Symbol;Acc:HGNC:600]	chr11	116835751	116837622	-1	q23.3	APOA1	62.61	protein_coding	1096
0.0053832	0.458	0.658	0.829	225566_at	ENSG00000118257	neuropilin 2 [Source:HGNC Symbol;Acc:HGNC:8005]	chr2	205681990	205798133	1	q33.3	NRP2	45.88	protein_coding	13896
0.0016137	0.38	0.713	1.266	207057_at	ENSG00000118596	solute carrier family 16 member 7 [Source:HGNC Symbol;Acc:HGNC:10928]	chr12	59596029	59789855	1	q14.1	SLC16A7	35.79	protein_coding	13703
0.0042894	0.454	1.527	0.798	57703_at	ENSG00000119231	SUMO specific peptidase 5 [Source:HGNC Symbol;Acc:HGNC:28407]	chr3	196867856	196934714	1	q29	SENP5	42.03	protein_coding	7035
0.0006102	0.319	0.557	0.732	202468_s_at	ENSG00000119326	catenin alpha like 1 [Source:HGNC Symbol;Acc:HGNC:2512]	chr9	108942569	109013522	-1	q31.3	CTNNAL1	39.11	protein_coding	3124
0.0056424	0.458	0.567	0.58	202419_at	ENSG00000119537	3-ketodihydrosphingosine reductase [Source:HGNC Symbol;Acc:HGNC:4021]	chr18	63327726	63367228	-1	q21.33	KDSR	42.04	protein_coding	9031
0.008862	0.464	1.501	0.673	236613_at	ENSG00000119707	RNA binding motif protein 25 [Source:HGNC Symbol;Acc:HGNC:23244]	chr14	73058532	73123899	1	q24.2	RBM25	40.67	protein_coding	11764
0.0097048	0.474	1.309	1.104	236538_at	ENSG00000120251	glutamate ionotropic receptor AMPA type subunit 2 [Source:HGNC Symbol;Acc:HGNC:4572]	chr4	157204182	157366075	1	q32.1	GRIA2	34.59	protein_coding	8941
0.0082714	0.458	1.164	2.045	205358_at	ENSG00000120251	glutamate ionotropic receptor AMPA type subunit 2 [Source:HGNC Symbol;Acc:HGNC:4572]	chr4	157204182	157366075	1	q32.1	GRIA2	34.59	protein_coding	8941
0.0010673	0.325	1.774	0.651	1554271_a_at	ENSG00000120334	centromere protein L [Source:HGNC Symbol;Acc:HGNC:17879]	chr1	173799550	173824883	-1	q25.1	CENPL	40.79	protein_coding	5165
0.0068541	0.458	1.773	0.521	232065_x_at	ENSG00000120334	centromere protein L [Source:HGNC Symbol;Acc:HGNC:17879]	chr1	173799550	173824883	-1	q25.1	CENPL	40.79	protein_coding	5165
0.0003599	0.274	1.84	0.792	228468_at	ENSG00000120539	microtubule associated serine/threonine kinase like [Source:HGNC Symbol;Acc:HGNC:19042]	chr10	27154824	27187953	1	p12.1	MASTL	41.56	protein_coding	4660
0.0068659	0.458	1.72	0.599	237167_at	ENSG00000120549	KIAA1217 [Source:HGNC Symbol;Acc:HGNC:25428]	chr10	23694746	24547848	1	p12.2	KIAA1217	40.56	protein_coding	10807
0.0091395	0.468	0.577	0.635	230305_at	ENSG00000120675	DnaJ heat shock protein family (Hsp40) member C15 [Source:HGNC Symbol;Acc:HGNC:20325]	chr13	43023203	43114213	1	q14.11	DNAJC15	38.12	protein_coding	8031
0.0021586	0.399	0.598	0.763	209295_at	ENSG00000120889	TNF receptor superfamily member 10b [Source:HGNC Symbol;Acc:HGNC:11905]	chr8	23020133	23069031	-1	p21.3	TNFRSF10B	43.19	protein_coding	5010
0.0094342	0.469	1.551	0.748	220235_s_at	ENSG00000121931	ligand dependent nuclear receptor interacting factor 1 [Source:HGNC Symbol;Acc:HGNC:30299]	chr1	110947190	110963965	-1	p13.3	LRIF1	36.39	protein_coding	3502
0.000782	0.325	1.733	0.79	221922_at	ENSG00000121957	G protein signaling modulator 2 [Source:HGNC Symbol;Acc:HGNC:29501]	chr1	108875350	108934545	1	p13.3	GPSM2	38.78	protein_coding	19578
0.0013515	0.352	1.642	0.77	205240_at	ENSG00000121957	G protein signaling modulator 2 [Source:HGNC Symbol;Acc:HGNC:29501]	chr1	108875350	108934545	1	p13.3	GPSM2	38.78	protein_coding	19578
0.0082884	0.458	1.559	0.722	205339_at	ENSG00000123473	STIL centriolar assembly protein [Source:HGNC Symbol;Acc:HGNC:10879]	chr1	47250139	47314892	-1	p33	STIL	40.15	protein_coding	7821
0.0072958	0.458	0.548	0.601	223407_at	ENSG00000124074	enkurin domain containing 1 [Source:HGNC Symbol;Acc:HGNC:25246]	chr16	67662945	67667265	-1	q22.1	ENKD1	60.38	protein_coding	2665
0.0008162	0.325	2.068	0.553	221010_s_at	ENSG00000124523	sirtuin 5 [Source:HGNC Symbol;Acc:HGNC:14933]	chr6	13574227	13615158	1	p23	SIRT5	42.96	protein_coding	11295
0.005452	0.458	0.679	0.954	202284_s_at	ENSG00000124762	cyclin dependent kinase inhibitor 1A [Source:HGNC Symbol;Acc:HGNC:1784]	chr6	36676460	36687337	1	p21.2	CDKN1A	54.41	protein_coding	2996
0.0011234	0.325	0.656	0.945	35147_at	ENSG00000126217	MCF.2 cell line derived transforming sequence like [Source:HGNC Symbol;Acc:HGNC:14576]	chr13	112894378	113099742	1	q34	MCF2L	54.36	protein_coding	23158
0.0011735	0.325	0.667	0.951	212935_at	ENSG00000126217	MCF.2 cell line derived transforming sequence like [Source:HGNC Symbol;Acc:HGNC:14576]	chr13	112894378	113099742	1	q34	MCF2L	54.36	protein_coding	23158
0.0099609	0.474	0.739	0.973	235489_at	ENSG00000126785	ras homolog family member J [Source:HGNC Symbol;Acc:HGNC:688]	chr14	63204114	63293508	1	q23.2	RHOJ	40.34	protein_coding	4082
0.0032083	0.443	1.426	1.071	203764_at	ENSG00000126787	DLG associated protein 5 [Source:HGNC Symbol;Acc:HGNC:16864]	chr14	55148112	55191608	-1	q22.3	DLGAP5	39.09	protein_coding	3597
0.003733	0.449	1.806	0.572	209580_s_at	ENSG00000129071	methyl-CpG binding domain 4, DNA glycosylase [Source:HGNC Symbol;Acc:HGNC:6919]	chr3	129430947	129440179	-1	q21.3	MBD4	39.91	protein_coding	3353
0.0016378	0.38	1.958	0.519	214048_at	ENSG00000129071	methyl-CpG binding domain 4, DNA glycosylase [Source:HGNC Symbol;Acc:HGNC:6919]	chr3	129430947	129440179	-1	q21.3	MBD4	39.91	protein_coding	3353
0.0066365	0.458	1.694	0.606	214047_s_at	ENSG00000129071	methyl-CpG binding domain 4, DNA glycosylase [Source:HGNC Symbol;Acc:HGNC:6919]	chr3	129430947	129440179	-1	q21.3	MBD4	39.91	protein_coding	3353
0.0014333	0.364	1.223	1.93	205363_at	ENSG00000129151	gamma-butyrobetaine hydroxylase 1 [Source:HGNC Symbol;Acc:HGNC:964]	chr11	27040725	27127809	1	p14.2	BBOX1	37.38	protein_coding	2464
0.0067145	0.458	2.206	0.437	1553801_a_at	ENSG00000129480	D-aminoacyl-tRNA deacylase 2 [Source:HGNC Symbol;Acc:HGNC:20277]	chr14	31446036	31457506	-1	q12	DTD2	38.5	protein_coding	2967
0.0044831	0.458	2.247	0.475	215773_x_at	ENSG00000129484	poly(ADP-ribose) polymerase 2 [Source:HGNC Symbol;Acc:HGNC:272]	chr14	20343615	20357904	1	q11.2	PARP2	42.3	protein_coding	4062
0.0085231	0.459	1.827	0.553	214086_s_at	ENSG00000129484	poly(ADP-ribose) polymerase 2 [Source:HGNC Symbol;Acc:HGNC:272]	chr14	20343615	20357904	1	q11.2	PARP2	42.3	protein_coding	4062
0.0082262	0.458	1.67	0.644	205010_at	ENSG00000130119	G protein nucleolar 3 like [Source:HGNC Symbol;Acc:HGNC:25553]	chrX	54530183	54621521	1	p11.22	GNL3L	42.41	protein_coding	11949
0.0092709	0.468	1.666	0.696	213553_x_at	ENSG00000130208	apolipoprotein C1 [Source:HGNC Symbol;Acc:HGNC:607]	chr19	44914247	44919349	1	q13.32	APOC1	53.46	protein_coding	1178
0.009903	0.474	0.613	0.581	210716_s_at	ENSG00000130779	CAP-Gly domain containing linker protein 1 [Source:HGNC Symbol;Acc:HGNC:10461]	chr12	122271432	122422669	-1	q24.31	CLIP1	43.9	protein_coding	18596
0.0047017	0.458	1.428	1.083	224482_s_at	ENSG00000131242	RAB11 family interacting protein 4 [Source:HGNC Symbol;Acc:HGNC:30267]	chr17	31391675	31538211	1	q11.2	RAB11FIP4	51.37	protein_coding	15326
0.0039039	0.449	1.6	0.875	225739_at	ENSG00000131242	RAB11 family interacting protein 4 [Source:HGNC Symbol;Acc:HGNC:30267]	chr17	31391675	31538211	1	q11.2	RAB11FIP4	51.37	protein_coding	15326
4.57e-05	0.162	1.655	1.037	225746_at	ENSG00000131242	RAB11 family interacting protein 4 [Source:HGNC Symbol;Acc:HGNC:30267]	chr17	31391675	31538211	1	q11.2	RAB11FIP4	51.37	protein_coding	15326
0.005215	0.458	0.581	0.628	203044_at	ENSG00000131873	chondroitin sulfate synthase 1 [Source:HGNC Symbol;Acc:HGNC:17198]	chr15	101175727	101252048	-1	q26.3	CHSY1	43.4	protein_coding	5667
0.001781	0.38	0.518	0.632	200749_at	ENSG00000132341	RAN, member RAS oncogene family [Source:HGNC Symbol;Acc:HGNC:9846]	chr12	130872037	130877678	1	q24.33	RAN	44.77	protein_coding	4667
0.0055179	0.458	1.822	0.522	202250_s_at	ENSG00000132716	DDB1 and CUL4 associated factor 8 [Source:HGNC Symbol;Acc:HGNC:24891]	chr1	160215715	160262549	-1	q23.2	DCAF8	42.25	protein_coding	7605
0.0016529	0.38	1.843	0.653	230270_at	ENSG00000134186	pre-mRNA processing factor 38B [Source:HGNC Symbol;Acc:HGNC:25512]	chr1	108692310	108702928	1	p13.3	PRPF38B	38.13	protein_coding	6955
0.0038024	0.449	1.413	1.02	201896_s_at	ENSG00000134222	proline and serine rich coiled-coil 1 [Source:HGNC Symbol;Acc:HGNC:24472]	chr1	109279556	109283186	-1	p13.3	PSRC1	53.65	protein_coding	2855
0.001238	0.339	1.598	0.835	212807_s_at	ENSG00000134243	sortilin 1 [Source:HGNC Symbol;Acc:HGNC:11186]	chr1	109309568	109397918	-1	p13.3	SORT1	42.26	protein_coding	9127
0.0017699	0.38	1.954	0.564	236327_at	ENSG00000134255	choline/ethanolamine phosphotransferase 1 [Source:HGNC Symbol;Acc:HGNC:24289]	chr1	111139627	111185104	1	p13.3	CEPT1	36.54	protein_coding	8418
0.0001728	0.246	2.325	0.502	1561884_at	ENSG00000134255	choline/ethanolamine phosphotransferase 1 [Source:HGNC Symbol;Acc:HGNC:24289]	chr1	111139627	111185104	1	p13.3	CEPT1	36.54	protein_coding	8418
0.0039808	0.449	2.1	0.488	224781_s_at	ENSG00000134453	RNA binding motif protein 17 [Source:HGNC Symbol;Acc:HGNC:16944]	chr10	6089034	6117457	1	p15.1	RBM17	41.2	protein_coding	6372
0.0064223	0.458	1.474	0.781	1558621_at	ENSG00000134508	Cdk5 and Abl enzyme substrate 1 [Source:HGNC Symbol;Acc:HGNC:25097]	chr18	23134564	23260470	1	q11.2	CABLES1	48.32	protein_coding	6874
0.0039648	0.449	0.667	0.969	218980_at	ENSG00000134775	formin homology 2 domain containing 3 [Source:HGNC Symbol;Acc:HGNC:26178]	chr18	36297714	36780055	1	q12.2	FHOD3	43.06	protein_coding	7965
0.0038379	0.449	0.684	0.904	204556_s_at	ENSG00000134874	DAZ interacting zinc finger protein 1 [Source:HGNC Symbol;Acc:HGNC:20908]	chr13	95578202	95644706	-1	q32.1	DZIP1	41.42	protein_coding	8473
0.0088448	0.464	0.768	1.21	204557_s_at	ENSG00000134874	DAZ interacting zinc finger protein 1 [Source:HGNC Symbol;Acc:HGNC:20908]	chr13	95578202	95644706	-1	q32.1	DZIP1	41.42	protein_coding	8473
0.0055897	0.458	1.63	0.613	205695_at	ENSG00000135094	serine dehydratase [Source:HGNC Symbol;Acc:HGNC:10691]	chr12	113392445	113426301	-1	q24.13	SDS	50.05	protein_coding	3005
0.0044329	0.456	0.541	0.593	225544_at	ENSG00000135111	T-box transcription factor 3 [Source:HGNC Symbol;Acc:HGNC:11602]	chr12	114670255	114684175	-1	q24.21	TBX3	47.3	protein_coding	5960
0.0011166	0.325	0.659	1.021	219682_s_at	ENSG00000135111	T-box transcription factor 3 [Source:HGNC Symbol;Acc:HGNC:11602]	chr12	114670255	114684175	-1	q24.21	TBX3	47.3	protein_coding	5960
0.0022956	0.399	1.833	0.612	217834_s_at	ENSG00000135316	synaptotagmin binding cytoplasmic RNA interacting protein [Source:HGNC Symbol;Acc:HGNC:16918]	chr6	85607779	85644063	-1	q14.3	SYNCRIP	40.29	protein_coding	10452
0.0010237	0.325	2.377	0.547	209028_s_at	ENSG00000136754	abl interactor 1 [Source:HGNC Symbol;Acc:HGNC:11320]	chr10	26746593	26861087	-1	p12.1	ABI1	38.44	protein_coding	4218
0.0009982	0.325	2.25	0.47	230521_at	ENSG00000137135	Rho guanine nucleotide exchange factor 39 [Source:HGNC Symbol;Acc:HGNC:25909]	chr9	35658875	35675866	-1	p13.3	ARHGEF39	49.95	protein_coding	6405
0.0042201	0.454	1.684	0.659	221452_s_at	ENSG00000137210	transmembrane protein 14B [Source:HGNC Symbol;Acc:HGNC:21384]	chr6	10747759	10852753	1	p24.2	TMEM14B	42.53	protein_coding	4815
0.0087156	0.464	0.659	0.841	206377_at	ENSG00000137273	forkhead box F2 [Source:HGNC Symbol;Acc:HGNC:3810]	chr6	1389576	1395603	1	p25.3	FOXF2	60.68	protein_coding	2451
0.0060781	0.458	0.661	0.81	209321_s_at	ENSG00000138031	adenylate cyclase 3 [Source:HGNC Symbol;Acc:HGNC:234]	chr2	24819169	24920237	-1	p23.3	ADCY3	51.12	protein_coding	6456
0.0021182	0.399	1.878	0.577	208368_s_at	ENSG00000139618	BRCA2 DNA repair associated [Source:HGNC Symbol;Acc:HGNC:1101]	chr13	32315086	32400268	1	q13.1	BRCA2	38.2	protein_coding	12778
0.0022549	0.399	2.161	0.503	214727_at	ENSG00000139618	BRCA2 DNA repair associated [Source:HGNC Symbol;Acc:HGNC:1101]	chr13	32315086	32400268	1	q13.1	BRCA2	38.2	protein_coding	12778
4.44e-05	0.162	1.528	1.314	219132_at	ENSG00000139946	pellino E3 ubiquitin protein ligase family member 2 [Source:HGNC Symbol;Acc:HGNC:8828]	chr14	56117814	56301524	1	q22.3	PELI2	39.92	protein_coding	6240
0.0073344	0.458	1.33	1.282	227461_at	ENSG00000140022	stonin 2 [Source:HGNC Symbol;Acc:HGNC:30652]	chr14	81260656	81436465	-1	q31.1	STON2	41.03	protein_coding	7812
0.0018985	0.388	1.371	1.268	235852_at	ENSG00000140022	stonin 2 [Source:HGNC Symbol;Acc:HGNC:30652]	chr14	81260656	81436465	-1	q31.1	STON2	41.03	protein_coding	7812
0.0015098	0.366	1.701	0.694	1552543_a_at	ENSG00000140022	stonin 2 [Source:HGNC Symbol;Acc:HGNC:30652]	chr14	81260656	81436465	-1	q31.1	STON2	41.03	protein_coding	7812
0.0022562	0.399	0.638	0.753	200972_at	ENSG00000140391	tetraspanin 3 [Source:HGNC Symbol;Acc:HGNC:17752]	chr15	77041404	77083984	-1	q24.3	TSPAN3	41.92	protein_coding	8400
0.0019082	0.388	0.652	0.872	200973_s_at	ENSG00000140391	tetraspanin 3 [Source:HGNC Symbol;Acc:HGNC:17752]	chr15	77041404	77083984	-1	q24.3	TSPAN3	41.92	protein_coding	8400
0.0051291	0.458	0.801	1.469	242662_at	ENSG00000140479	proprotein convertase subtilisin/kexin type 6 [Source:HGNC Symbol;Acc:HGNC:8569]	chr15	101289784	101525202	-1	q26.3	PCSK6	47.98	protein_coding	21740
0.0026089	0.407	0.778	1.422	207414_s_at	ENSG00000140479	proprotein convertase subtilisin/kexin type 6 [Source:HGNC Symbol;Acc:HGNC:8569]	chr15	101289784	101525202	-1	q26.3	PCSK6	47.98	protein_coding	21740
0.0071528	0.458	0.511	0.494	200856_x_at	ENSG00000141027	nuclear receptor corepressor 1 [Source:HGNC Symbol;Acc:HGNC:7672]	chr17	16029157	16218185	-1	p11.2	NCOR1	39.72	protein_coding	15404
0.0093363	0.468	0.538	0.526	223018_at	ENSG00000141101	NIN1 (RPN12) binding protein 1 homolog [Source:HGNC Symbol;Acc:HGNC:29540]	chr16	69741871	69754926	-1	q22.1	NOB1	48.25	protein_coding	2101
0.0023403	0.399	0.762	1.05	228834_at	ENSG00000141232	transducer of ERBB2, 1 [Source:HGNC Symbol;Acc:HGNC:11979]	chr17	50862223	50867978	-1	q21.33	TOB1	50.17	protein_coding	2521
0.0054276	0.458	0.517	0.596	201455_s_at	ENSG00000141279	aminopeptidase puromycin sensitive [Source:HGNC Symbol;Acc:HGNC:7900]	chr17	47522942	47624665	1	q21.32	NPEPPS	41.3	protein_coding	12881
0.0067865	0.458	0.508	0.473	227903_x_at	ENSG00000141933	tubulin polyglutamylase complex subunit 1 [Source:HGNC Symbol;Acc:HGNC:25058]	chr19	507497	519654	1	p13.3	TPGS1	61.72	protein_coding	3642
0.0075687	0.458	1.399	1.003	209408_at	ENSG00000142945	kinesin family member 2C [Source:HGNC Symbol;Acc:HGNC:6393]	chr1	44739818	44767767	1	p34.1	KIF2C	49.08	protein_coding	3646
0.0098588	0.474	1.197	1.659	1555497_a_at	ENSG00000142973	cytochrome P450 family 4 subfamily B member 1 [Source:HGNC Symbol;Acc:HGNC:2644]	chr1	46757838	46819413	1	p33	CYP4B1	43.78	protein_coding	3466
0.0072584	0.458	1.127	2.652	210096_at	ENSG00000142973	cytochrome P450 family 4 subfamily B member 1 [Source:HGNC Symbol;Acc:HGNC:2644]	chr1	46757838	46819413	1	p33	CYP4B1	43.78	protein_coding	3466
0.0085236	0.459	2.011	0.477	1552617_a_at	ENSG00000143207	COP1 E3 ubiquitin ligase [Source:HGNC Symbol;Acc:HGNC:17440]	chr1	175944831	176207286	-1	q25.2	COP1	36.3	protein_coding	4177
0.0038604	0.449	1.379	1.097	223381_at	ENSG00000143228	NUF2 component of NDC80 kinetochore complex [Source:HGNC Symbol;Acc:HGNC:14621]	chr1	163266576	163355764	1	q23.3	NUF2	36.44	protein_coding	3362
0.0096649	0.474	1.295	1.228	226615_at	ENSG00000143324	xenotropic and polytropic retrovirus receptor 1 [Source:HGNC Symbol;Acc:HGNC:12827]	chr1	180632022	180890279	1	q25.3	XPR1	36.94	protein_coding	8913
0.0044275	0.456	1.289	1.345	214433_s_at	ENSG00000143416	selenium binding protein 1 [Source:HGNC Symbol;Acc:HGNC:10719]	chr1	151364304	151372707	-1	q21.3	SELENBP1	54.97	protein_coding	3476
0.001848	0.386	2.242	0.506	210151_s_at	ENSG00000143479	dual specificity tyrosine phosphorylation regulated kinase 3 [Source:HGNC Symbol;Acc:HGNC:3094]	chr1	206635536	206684419	1	q32.1	DYRK3	44.46	protein_coding	10297
0.0004947	0.301	1.736	0.819	1555225_at	ENSG00000143612	chromosome 1 open reading frame 43 [Source:HGNC Symbol;Acc:HGNC:29876]	chr1	154206696	154220637	-1	q21.3	C1orf43	45.86	protein_coding	2670
0.0033367	0.448	2.059	0.526	200052_s_at	ENSG00000143621	interleukin enhancer binding factor 2 [Source:HGNC Symbol;Acc:HGNC:6037]	chr1	153661788	153671028	-1	q21.3	ILF2	44.32	protein_coding	2261
0.0099793	0.474	0.54	0.536	225900_at	ENSG00000144036	exocyst complex component 6B [Source:HGNC Symbol;Acc:HGNC:17085]	chr2	72175984	72826041	-1	p13.2	EXOC6B	37.12	protein_coding	10197
0.0065641	0.458	1.179	1.87	206772_at	ENSG00000144407	parathyroid hormone 2 receptor [Source:HGNC Symbol;Acc:HGNC:9609]	chr2	208359714	208854503	1	q34	PTH2R	37.4	protein_coding	4429
0.0006132	0.319	0.383	0.446	226948_at	ENSG00000144468	rhomboid domain containing 1 [Source:HGNC Symbol;Acc:HGNC:23081]	chr2	226835581	226999215	1	q36.3	RHBDD1	39.57	protein_coding	6926
0.0043717	0.456	1.654	0.694	227103_s_at	ENSG00000145194	endothelin converting enzyme 2 [Source:HGNC Symbol;Acc:HGNC:13275]	chr3	184276011	184293031	1	q27.1	ECE2	52.92	protein_coding	4729
0.0003048	0.274	2.038	0.577	201736_s_at	ENSG00000145495	membrane associated ring-CH-type finger 6 [Source:HGNC Symbol;Acc:HGNC:30550]	chr5	10353695	10440388	1	p15.2	MARCHF6	39.32	protein_coding	11344
0.0061824	0.458	1.894	0.497	209104_s_at	ENSG00000145912	NHP2 ribonucleoprotein [Source:HGNC Symbol;Acc:HGNC:14377]	chr5	178149463	178153894	-1	q35.3	NHP2	52.05	protein_coding	1434
0.0051884	0.458	0.797	1.449	212143_s_at	ENSG00000146674	insulin like growth factor binding protein 3 [Source:HGNC Symbol;Acc:HGNC:5472]	chr7	45912245	45921874	-1	p12.3	IGFBP3	49.16	protein_coding	4569
0.0065261	0.458	0.8	1.395	210095_s_at	ENSG00000146674	insulin like growth factor binding protein 3 [Source:HGNC Symbol;Acc:HGNC:5472]	chr7	45912245	45921874	-1	p12.3	IGFBP3	49.16	protein_coding	4569
0.0054656	0.458	1.5	0.777	219588_s_at	ENSG00000146918	non-SMC condensin II complex subunit G2 [Source:HGNC Symbol;Acc:HGNC:21904]	chr7	158631169	158704804	-1	q36.3	NCAPG2	41.8	protein_coding	7105
0.0003586	0.274	0.575	0.832	204967_at	ENSG00000146950	shroom family member 2 [Source:HGNC Symbol;Acc:HGNC:630]	chrX	9786429	9949443	1	p22.2	SHROOM2	47.43	protein_coding	8218
0.0027834	0.412	0.669	0.885	225478_at	ENSG00000147324	malignant fibrous histiocytoma amplified sequence 1 [Source:HGNC Symbol;Acc:HGNC:16982]	chr8	8783354	8893630	-1	p23.1	MFHAS1	44.15	protein_coding	6868
0.0008257	0.325	0.688	1.06	213457_at	ENSG00000147324	malignant fibrous histiocytoma amplified sequence 1 [Source:HGNC Symbol;Acc:HGNC:16982]	chr8	8783354	8893630	-1	p23.1	MFHAS1	44.15	protein_coding	6868
0.0080528	0.458	0.693	0.926	222528_s_at	ENSG00000147454	solute carrier family 25 member 37 [Source:HGNC Symbol;Acc:HGNC:29786]	chr8	23528956	23575463	1	p21.2	SLC25A37	48.38	protein_coding	7996
0.0005907	0.319	0.671	1.073	230206_at	ENSG00000147459	dedicator of cytokinesis 5 [Source:HGNC Symbol;Acc:HGNC:23476]	chr8	25184689	25418082	1	p21.2	DOCK5	42.37	protein_coding	15989
0.001942	0.391	0.662	0.938	230207_s_at	ENSG00000147459	dedicator of cytokinesis 5 [Source:HGNC Symbol;Acc:HGNC:23476]	chr8	25184689	25418082	1	p21.2	DOCK5	42.37	protein_coding	15989
0.0048314	0.458	0.568	0.669	1570078_a_at	ENSG00000147459	dedicator of cytokinesis 5 [Source:HGNC Symbol;Acc:HGNC:23476]	chr8	25184689	25418082	1	p21.2	DOCK5	42.37	protein_coding	15989
0.0002807	0.274	0.693	1.198	230263_s_at	ENSG00000147459	dedicator of cytokinesis 5 [Source:HGNC Symbol;Acc:HGNC:23476]	chr8	25184689	25418082	1	p21.2	DOCK5	42.37	protein_coding	15989
0.0002112	0.265	1.758	0.889	211767_at	ENSG00000147536	GINS complex subunit 4 [Source:HGNC Symbol;Acc:HGNC:28226]	chr8	41529218	41545030	1	p11.21	GINS4	46.73	protein_coding	5447
0.0009838	0.325	1.827	0.767	1554356_at	ENSG00000147536	GINS complex subunit 4 [Source:HGNC Symbol;Acc:HGNC:28226]	chr8	41529218	41545030	1	p11.21	GINS4	46.73	protein_coding	5447
0.0042802	0.454	1.239	1.493	239006_at	ENSG00000147606	solute carrier family 26 member 7 [Source:HGNC Symbol;Acc:HGNC:14467]	chr8	91209494	91398155	1	q21.3	SLC26A7	35.97	protein_coding	6257
0.0002661	0.274	1.575	0.791	233304_at	ENSG00000147862	nuclear factor I B [Source:HGNC Symbol;Acc:HGNC:7785]	chr9	14081843	14398983	-1	p22.3	NFIB	38.29	protein_coding	12765
0.0024682	0.399	1.234	1.781	207039_at	ENSG00000147889	cyclin dependent kinase inhibitor 2A [Source:HGNC Symbol;Acc:HGNC:1787]	chr9	21967752	21995301	-1	p21.3	CDKN2A	41.19	protein_coding	3885
0.0018001	0.38	1.298	1.539	209644_x_at	ENSG00000147889	cyclin dependent kinase inhibitor 2A [Source:HGNC Symbol;Acc:HGNC:1787]	chr9	21967752	21995301	-1	p21.3	CDKN2A	41.19	protein_coding	3885
0.0049552	0.458	0.697	1.029	210367_s_at	ENSG00000148344	prostaglandin E synthase [Source:HGNC Symbol;Acc:HGNC:9599]	chr9	129738331	129753042	-1	q34.11	PTGES	52.26	protein_coding	1891
0.0001138	0.243	2.108	0.636	220865_s_at	ENSG00000148459	decaprenyl diphosphate synthase subunit 1 [Source:HGNC Symbol;Acc:HGNC:17759]	chr10	26697701	26746798	1	p12.1	PDSS1	44.16	protein_coding	1913
0.0010768	0.325	0.672	1.1	208078_s_at	ENSG00000148516	zinc finger E-box binding homeobox 1 [Source:HGNC Symbol;Acc:HGNC:11642]	chr10	31318495	31529814	1	p11.22	ZEB1	36.04	protein_coding	8650
0.0017531	0.38	1.578	0.751	215190_at	ENSG00000149100	eukaryotic translation initiation factor 3 subunit M [Source:HGNC Symbol;Acc:HGNC:24460]	chr11	32583798	32606264	1	p13	EIF3M	37.78	protein_coding	7430
0.0065235	0.458	0.779	1.334	213273_at	ENSG00000149256	teneurin transmembrane protein 4 [Source:HGNC Symbol;Acc:HGNC:29945]	chr11	78652829	79441030	-1	q14.1	TENM4	44.45	protein_coding	16414
0.000136	0.246	2.118	0.532	241360_at	ENSG00000149548	coiled-coil domain containing 15 [Source:HGNC Symbol;Acc:HGNC:25798]	chr11	124954121	125041489	1	q24.2	CCDC15	37.57	protein_coding	4823
0.0036143	0.449	1.623	0.716	238075_at	ENSG00000149554	checkpoint kinase 1 [Source:HGNC Symbol;Acc:HGNC:1925]	chr11	125625163	125676255	1	q24.2	CHEK1	37.73	protein_coding	5600
0.0003166	0.274	1.68	0.912	205393_s_at	ENSG00000149554	checkpoint kinase 1 [Source:HGNC Symbol;Acc:HGNC:1925]	chr11	125625163	125676255	1	q24.2	CHEK1	37.73	protein_coding	5600
0.0013034	0.351	1.515	0.986	205394_at	ENSG00000149554	checkpoint kinase 1 [Source:HGNC Symbol;Acc:HGNC:1925]	chr11	125625163	125676255	1	q24.2	CHEK1	37.73	protein_coding	5600
0.0001516	0.246	2.245	0.581	219512_at	ENSG00000149636	DSN1 component of MIS12 kinetochore complex [Source:HGNC Symbol;Acc:HGNC:16165]	chr20	36751791	36773818	-1	q11.23	DSN1	44.84	protein_coding	2739
0.0055959	0.458	1.261	1.515	238778_at	ENSG00000150054	membrane palmitoylated protein 7 [Source:HGNC Symbol;Acc:HGNC:26542]	chr10	28050993	28334486	-1	p12.1	MPP7	38.78	protein_coding	6371
0.0047608	0.458	1.582	0.75	1564308_a_at	ENSG00000150054	membrane palmitoylated protein 7 [Source:HGNC Symbol;Acc:HGNC:26542]	chr10	28050993	28334486	-1	p12.1	MPP7	38.78	protein_coding	6371
0.0052092	0.458	1.403	1.021	238451_at	ENSG00000150054	membrane palmitoylated protein 7 [Source:HGNC Symbol;Acc:HGNC:26542]	chr10	28050993	28334486	-1	p12.1	MPP7	38.78	protein_coding	6371
0.006859	0.458	2.139	0.433	208696_at	ENSG00000150753	chaperonin containing TCP1 subunit 5 [Source:HGNC Symbol;Acc:HGNC:1618]	chr5	10249929	10266389	1	p15.2	CCT5	43.6	protein_coding	5638
0.0097954	0.474	1.895	0.474	223478_at	ENSG00000150779	translocase of inner mitochondrial membrane 8 homolog B [Source:HGNC Symbol;Acc:HGNC:11818]	chr11	112084800	112086798	-1	q23.1	TIMM8B	46.22	protein_coding	1166
0.0011315	0.325	0.491	0.691	201681_s_at	ENSG00000151208	discs large MAGUK scaffold protein 5 [Source:HGNC Symbol;Acc:HGNC:2904]	chr10	77790791	77926755	-1	q22.3	DLG5	50.06	protein_coding	10500
0.0046628	0.458	1.752	0.57	201725_at	ENSG00000151465	cell division cycle 123 [Source:HGNC Symbol;Acc:HGNC:16827]	chr10	12195965	12250589	1	p14	CDC123	42.91	protein_coding	2298
0.0067385	0.458	1.869	0.548	212789_at	ENSG00000151503	non-SMC condensin II complex subunit D3 [Source:HGNC Symbol;Acc:HGNC:28952]	chr11	134150113	134225454	-1	q25	NCAPD3	43.33	protein_coding	10970
0.001754	0.38	1.927	0.652	205664_at	ENSG00000151657	Kin17 DNA and RNA binding protein [Source:HGNC Symbol;Acc:HGNC:6327]	chr10	7750962	7787993	-1	p14	KIN	39.94	protein_coding	6856
0.0089457	0.464	1.536	0.81	1554572_a_at	ENSG00000152455	suppressor of variegation 3-9 homolog 2 [Source:HGNC Symbol;Acc:HGNC:17287]	chr10	14878820	14904315	1	p13	SUV39H2	39.96	protein_coding	3565
0.0011035	0.325	2.029	0.654	239376_at	ENSG00000152457	DNA cross-link repair 1C [Source:HGNC Symbol;Acc:HGNC:17642]	chr10	14897359	14954432	-1	p13	DCLRE1C	41.86	protein_coding	9592
0.0016945	0.38	1.853	0.695	222233_s_at	ENSG00000152457	DNA cross-link repair 1C [Source:HGNC Symbol;Acc:HGNC:17642]	chr10	14897359	14954432	-1	p13	DCLRE1C	41.86	protein_coding	9592
0.0090836	0.468	0.744	1.197	227148_at	ENSG00000152527	pleckstrin homology, MyTH4 and FERM domain containing H2 [Source:HGNC Symbol;Acc:HGNC:30506]	chr2	43637260	43767987	1	p21	PLEKHH2	38.98	protein_coding	9848
0.0058345	0.458	0.61	0.711	209068_at	ENSG00000152795	heterogeneous nuclear ribonucleoprotein D like [Source:HGNC Symbol;Acc:HGNC:5037]	chr4	82422565	82430462	-1	q21.22	HNRNPDL	42.42	protein_coding	5529
0.0077549	0.458	0.537	0.569	235791_x_at	ENSG00000153922	chromodomain helicase DNA binding protein 1 [Source:HGNC Symbol;Acc:HGNC:1915]	chr5	98853985	98929007	-1	q21.1	CHD1	35.18	protein_coding	10487
0.0081669	0.458	1.474	0.851	225259_at	ENSG00000154917	RAB6B, member RAS oncogene family [Source:HGNC Symbol;Acc:HGNC:14902]	chr3	133824235	133895882	-1	q22.1	RAB6B	49.61	protein_coding	6055
0.0082228	0.458	1.372	0.942	210127_at	ENSG00000154917	RAB6B, member RAS oncogene family [Source:HGNC Symbol;Acc:HGNC:14902]	chr3	133824235	133895882	-1	q22.1	RAB6B	49.61	protein_coding	6055
0.0022894	0.399	1.758	0.554	233917_s_at	ENSG00000155363	Mov10 RISC complex RNA helicase [Source:HGNC Symbol;Acc:HGNC:7200]	chr1	112673141	112700746	1	p13.2	MOV10	48.61	protein_coding	6509
0.0007909	0.325	1.779	0.664	223849_s_at	ENSG00000155363	Mov10 RISC complex RNA helicase [Source:HGNC Symbol;Acc:HGNC:7200]	chr1	112673141	112700746	1	p13.2	MOV10	48.61	protein_coding	6509
0.0001622	0.246	2.045	0.637	229484_at	ENSG00000155367	protein phosphatase, Mg2+/Mn2+ dependent 1J [Source:HGNC Symbol;Acc:HGNC:20785]	chr1	112709994	112715477	-1	p13.2	PPM1J	58.3	protein_coding	2874
0.0066833	0.458	1.395	1.035	222740_at	ENSG00000156802	ATPase family AAA domain containing 2 [Source:HGNC Symbol;Acc:HGNC:30123]	chr8	123319850	123416350	-1	q24.13	ATAD2	40.58	protein_coding	7100
0.0041456	0.454	1.417	1.037	218782_s_at	ENSG00000156802	ATPase family AAA domain containing 2 [Source:HGNC Symbol;Acc:HGNC:30123]	chr8	123319850	123416350	-1	q24.13	ATAD2	40.58	protein_coding	7100
0.0023887	0.399	0.511	0.761	1555007_s_at	ENSG00000158023	cilia and flagella associated protein 251 [Source:HGNC Symbol;Acc:HGNC:28506]	chr12	121918592	122003927	1	q24.31	CFAP251	46.46	protein_coding	15385
0.004574	0.458	1.313	1.199	232035_at	ENSG00000158406	H4 clustered histone 8 [Source:HGNC Symbol;Acc:HGNC:4788]	chr6	26277609	26285638	-1	p22.2	H4C8	41.76	protein_coding	2163
0.0049842	0.458	0.596	0.919	205627_at	ENSG00000158825	cytidine deaminase [Source:HGNC Symbol;Acc:HGNC:1712]	chr1	20589086	20618903	1	p36.12	CDA	48.46	protein_coding	820
0.0039511	0.449	0.8	1.787	227742_at	ENSG00000159212	chloride intracellular channel 6 [Source:HGNC Symbol;Acc:HGNC:2065]	chr21	34668994	34718227	1	q22.12	CLIC6	45.91	protein_coding	4255
0.0081043	0.458	0.597	0.649	232081_at	ENSG00000160179	ATP binding cassette subfamily G member 1 [Source:HGNC Symbol;Acc:HGNC:73]	chr21	42199689	42297244	1	q22.3	ABCG1	51.02	protein_coding	6121
0.0066461	0.458	0.607	0.782	221946_at	ENSG00000160345	chromosome 9 open reading frame 116 [Source:HGNC Symbol;Acc:HGNC:28435]	chr9	135495181	135501734	-1	q34.3	C9orf116	57.16	protein_coding	1864
0.0007303	0.325	2.118	0.525	205661_s_at	ENSG00000160688	flavin adenine dinucleotide synthetase 1 [Source:HGNC Symbol;Acc:HGNC:24671]	chr1	154983338	154993111	1	q21.3	FLAD1	51.25	protein_coding	4019
0.0022478	0.399	2.004	0.579	1553015_a_at	ENSG00000160957	RecQ like helicase 4 [Source:HGNC Symbol;Acc:HGNC:9949]	chr8	144511288	144517845	-1	q24.3	RECQL4	65.51	protein_coding	4236
0.0063076	0.458	2.084	0.492	213520_at	ENSG00000160957	RecQ like helicase 4 [Source:HGNC Symbol;Acc:HGNC:9949]	chr8	144511288	144517845	-1	q24.3	RECQL4	65.51	protein_coding	4236
0.002466	0.399	1.926	0.549	210093_s_at	ENSG00000162385	mago homolog, exon junction complex subunit [Source:HGNC Symbol;Acc:HGNC:6815]	chr1	53226900	53238518	-1	p32.3	MAGOH	41.43	protein_coding	1363
0.007003	0.458	0.814	1.726	218309_at	ENSG00000162545	calcium/calmodulin dependent protein kinase II inhibitor 1 [Source:HGNC Symbol;Acc:HGNC:24190]	chr1	20482391	20486210	-1	p36.12	CAMK2N1	57.49	protein_coding	2605
0.007142	0.458	0.781	1.453	215506_s_at	ENSG00000162595	DIRAS family GTPase 3 [Source:HGNC Symbol;Acc:HGNC:687]	chr1	68045886	68051631	-1	p31.3	DIRAS3	43.82	protein_coding	2049
0.0005775	0.319	1.493	1.022	225841_at	ENSG00000162639	HEN methyltransferase 1 [Source:HGNC Symbol;Acc:HGNC:26400]	chr1	108648290	108661526	-1	p13.3	HENMT1	41.28	protein_coding	2426
0.0005117	0.301	1.98	0.611	203566_s_at	ENSG00000162688	amylo-alpha-1, 6-glucosidase, 4-alpha-glucanotransferase [Source:HGNC Symbol;Acc:HGNC:321]	chr1	99850361	99924023	1	p21.2	AGL	36.33	protein_coding	8157
7.18e-05	0.219	0.41	0.595	213493_at	ENSG00000162804	sushi, nidogen and EGF like domains 1 [Source:HGNC Symbol;Acc:HGNC:24696]	chr2	240998618	241095568	1	q37.3	SNED1	50.87	protein_coding	13812
2.32e-05	0.162	0.553	0.896	213488_at	ENSG00000162804	sushi, nidogen and EGF like domains 1 [Source:HGNC Symbol;Acc:HGNC:24696]	chr2	240998618	241095568	1	q37.3	SNED1	50.87	protein_coding	13812
0.0038246	0.449	0.575	0.687	206090_s_at	ENSG00000162946	DISC1 scaffold protein [Source:HGNC Symbol;Acc:HGNC:2888]	chr1	231626790	232041272	1	q42.2	DISC1	42.18	protein_coding	12931
0.0001428	0.246	0.706	1.377	238029_s_at	ENSG00000163053	solute carrier family 16 member 14 [Source:HGNC Symbol;Acc:HGNC:26417]	chr2	230034982	230068993	-1	q36.3	SLC16A14	42.85	protein_coding	4932
0.0053884	0.458	1.64	0.664	235425_at	ENSG00000163535	shugoshin 2 [Source:HGNC Symbol;Acc:HGNC:30812]	chr2	200510008	200584096	1	q33.1	SGO2	37.74	protein_coding	6336
0.0083443	0.458	1.408	0.829	230165_at	ENSG00000163535	shugoshin 2 [Source:HGNC Symbol;Acc:HGNC:30812]	chr2	200510008	200584096	1	q33.1	SGO2	37.74	protein_coding	6336
0.0065388	0.458	0.52	0.475	212598_at	ENSG00000163625	WD repeat and FYVE domain containing 3 [Source:HGNC Symbol;Acc:HGNC:20751]	chr4	84669597	84966690	-1	q21.23	WDFY3	36.91	protein_coding	17168
0.0071086	0.458	0.604	0.592	224605_at	ENSG00000164096	chromosome 4 open reading frame 3 [Source:HGNC Symbol;Acc:HGNC:19225]	chr4	119296419	119304445	-1	q26	C4orf3	42.89	protein_coding	2960
0.0099077	0.474	1.598	0.746	208808_s_at	ENSG00000164104	high mobility group box 2 [Source:HGNC Symbol;Acc:HGNC:5000]	chr4	173331376	173334432	-1	q34.1	HMGB2	45.5	protein_coding	2401
0.0085149	0.459	0.761	1.124	223204_at	ENSG00000164125	golgi associated kinase 1B [Source:HGNC Symbol;Acc:HGNC:25312]	chr4	158124474	158173318	-1	q32.1	GASK1B	37.11	protein_coding	7880
0.0049208	0.458	0.785	1.409	202975_s_at	ENSG00000164292	Rho related BTB domain containing 3 [Source:HGNC Symbol;Acc:HGNC:18757]	chr5	95713522	95824383	1	q15	RHOBTB3	40.56	protein_coding	8827
0.0086807	0.464	0.806	1.49	202976_s_at	ENSG00000164292	Rho related BTB domain containing 3 [Source:HGNC Symbol;Acc:HGNC:18757]	chr5	95713522	95824383	1	q15	RHOBTB3	40.56	protein_coding	8827
0.0050922	0.458	2.065	0.509	200608_s_at	ENSG00000164754	RAD21 cohesin complex component [Source:HGNC Symbol;Acc:HGNC:9811]	chr8	116845934	116874776	-1	q24.11	RAD21	35.95	protein_coding	6103
0.0062559	0.458	1.876	0.56	225676_s_at	ENSG00000164934	DDB1 and CUL4 associated factor 13 [Source:HGNC Symbol;Acc:HGNC:24535]	chr8	103414714	103443453	1	q22.3	DCAF13	37.09	protein_coding	9199
0.004104	0.454	1.489	0.902	204825_at	ENSG00000165304	maternal embryonic leucine zipper kinase [Source:HGNC Symbol;Acc:HGNC:16870]	chr9	36572862	36677683	1	p13.2	MELK	41.98	protein_coding	3087
0.0055417	0.458	2.101	0.476	205711_x_at	ENSG00000165629	ATP synthase F1 subunit gamma [Source:HGNC Symbol;Acc:HGNC:833]	chr10	7788147	7807815	1	p14	ATP5F1C	40.09	protein_coding	2308
0.0036856	0.449	1.992	0.494	235760_at	ENSG00000165671	nuclear receptor binding SET domain protein 1 [Source:HGNC Symbol;Acc:HGNC:14234]	chr5	177133025	177300213	1	q35.3	NSD1	42.34	protein_coding	15516
0.0084461	0.459	1.193	1.8	202888_s_at	ENSG00000166825	alanyl aminopeptidase, membrane [Source:HGNC Symbol;Acc:HGNC:500]	chr15	89784895	89815401	-1	q26.1	ANPEP	53.35	protein_coding	5046
0.0010912	0.325	0.553	0.67	205398_s_at	ENSG00000166949	SMAD family member 3 [Source:HGNC Symbol;Acc:HGNC:6769]	chr15	67063763	67195173	1	q22.33	SMAD3	48.33	protein_coding	9981
0.0013344	0.351	2.528	0.453	212499_s_at	ENSG00000168175	mitogen-activated protein kinase 1 interacting protein 1 like [Source:HGNC Symbol;Acc:HGNC:19840]	chr14	55051647	55070194	1	q22.3	MAPK1IP1L	40.14	protein_coding	6974
0.0032366	0.443	1.958	0.572	230900_at	ENSG00000168491	coiled-coil domain containing 110 [Source:HGNC Symbol;Acc:HGNC:28504]	chr4	185445182	185471752	-1	q35.1	CCDC110	40.42	protein_coding	3534
0.0066128	0.458	1.836	0.525	220934_s_at	ENSG00000168569	transmembrane protein 223 [Source:HGNC Symbol;Acc:HGNC:28464]	chr11	62771629	62792006	-1	q12.3	TMEM223	52.08	protein_coding	2265
0.000742	0.325	0.756	1.447	209570_s_at	ENSG00000168824	neuronal vesicle trafficking associated 1 [Source:HGNC Symbol;Acc:HGNC:18790]	chr4	4348140	4419058	1	p16.3	NSG1	50.8	protein_coding	4355
0.0013292	0.351	0.669	1.01	213533_at	ENSG00000168824	neuronal vesicle trafficking associated 1 [Source:HGNC Symbol;Acc:HGNC:18790]	chr4	4348140	4419058	1	p16.3	NSG1	50.8	protein_coding	4355
0.0036386	0.449	0.813	1.7	209569_x_at	ENSG00000168824	neuronal vesicle trafficking associated 1 [Source:HGNC Symbol;Acc:HGNC:18790]	chr4	4348140	4419058	1	p16.3	NSG1	50.8	protein_coding	4355
0.000518	0.301	1.756	0.691	1559494_at	ENSG00000168917	solute carrier family 35 member G2 [Source:HGNC Symbol;Acc:HGNC:28480]	chr3	136818647	136855888	1	q22.3	SLC35G2	41.29	protein_coding	4283
0.0043393	0.456	0.687	1.096	242979_at	ENSG00000169047	insulin receptor substrate 1 [Source:HGNC Symbol;Acc:HGNC:6125]	chr2	226731312	226799820	-1	q36.3	IRS1	40.92	protein_coding	10019
0.0048025	0.458	0.745	1.223	204686_at	ENSG00000169047	insulin receptor substrate 1 [Source:HGNC Symbol;Acc:HGNC:6125]	chr2	226731312	226799820	-1	q36.3	IRS1	40.92	protein_coding	10019
0.0051926	0.458	0.511	0.535	238053_at	ENSG00000169084	dehydrogenase/reductase X-linked [Source:HGNC Symbol;Acc:HGNC:18399]	chrX	2219506	2502805	-1	p22.33	DHRSX	47.11	protein_coding	3628
0.0053909	0.458	0.551	0.628	225503_at	ENSG00000169084	dehydrogenase/reductase X-linked [Source:HGNC Symbol;Acc:HGNC:18399]	chrX	2219506	2502805	-1	p22.33	DHRSX	47.11	protein_coding	3628
0.0099314	0.474	2.002	0.448	223032_x_at	ENSG00000169230	PRELI domain containing 1 [Source:HGNC Symbol;Acc:HGNC:30255]	chr5	177303799	177306949	1	q35.3	PRELID1	54.08	protein_coding	1840
0.0080087	0.458	1.87	0.514	219125_s_at	ENSG00000169241	solute carrier family 50 member 1 [Source:HGNC Symbol;Acc:HGNC:30657]	chr1	155135344	155138857	1	q22	SLC50A1	55.69	protein_coding	2340
0.0089418	0.464	0.79	1.289	212158_at	ENSG00000169439	syndecan 2 [Source:HGNC Symbol;Acc:HGNC:10659]	chr8	96493813	96611790	1	q22.1	SDC2	41.32	protein_coding	4084
0.0068541	0.458	0.763	1.191	224694_at	ENSG00000169604	ANTXR cell adhesion molecule 1 [Source:HGNC Symbol;Acc:HGNC:21014]	chr2	69013176	69249327	1	p13.3	ANTXR1	41.88	protein_coding	17891
0.0075273	0.458	1.56	0.684	229610_at	ENSG00000169607	cytoskeleton associated protein 2 like [Source:HGNC Symbol;Acc:HGNC:26877]	chr2	112736349	112764664	-1	q14.1	CKAP2L	39.56	protein_coding	5464
0.0021838	0.399	2.462	0.472	206968_s_at	ENSG00000170322	nuclear factor related to kappaB binding protein [Source:HGNC Symbol;Acc:HGNC:7802]	chr11	129863636	129895590	-1	q24.3	NFRKB	45.4	protein_coding	6335
0.0004233	0.291	2.312	0.513	224678_at	ENSG00000170471	Ral GTPase activating protein non-catalytic subunit beta [Source:HGNC Symbol;Acc:HGNC:29221]	chr20	38472816	38578859	1	q11.23	RALGAPB	39.37	protein_coding	12631
0.0050837	0.458	1.907	0.54	221738_at	ENSG00000170471	Ral GTPase activating protein non-catalytic subunit beta [Source:HGNC Symbol;Acc:HGNC:29221]	chr20	38472816	38578859	1	q11.23	RALGAPB	39.37	protein_coding	12631
0.0070067	0.458	1.467	0.889	202464_s_at	ENSG00000170525	6-phosphofructo-2-kinase/fructose-2,6-biphosphatase 3 [Source:HGNC Symbol;Acc:HGNC:8874]	chr10	6144934	6254644	1	p15.1	PFKFB3	50.91	protein_coding	6114
0.0031957	0.443	0.605	0.674	226216_at	ENSG00000171105	insulin receptor [Source:HGNC Symbol;Acc:HGNC:6091]	chr19	7112255	7294414	-1	p13.2	INSR	47.51	protein_coding	10831
0.0025036	0.402	0.483	0.508	228354_at	ENSG00000171160	MORN repeat containing 4 [Source:HGNC Symbol;Acc:HGNC:24001]	chr10	97614553	97633500	-1	q24.2	MORN4	46.51	protein_coding	2512
0.008227	0.458	1.337	1.122	204897_at	ENSG00000171522	prostaglandin E receptor 4 [Source:HGNC Symbol;Acc:HGNC:9596]	chr5	40679915	40693735	1	p13.1	PTGER4	41.96	protein_coding	3544
0.0049113	0.458	1.632	0.673	233436_at	ENSG00000172167	MDM2 binding protein [Source:HGNC Symbol;Acc:HGNC:7417]	chr8	120445400	120542133	1	q24.12	MTBP	35.31	protein_coding	8327
0.0003576	0.274	2.618	0.478	213754_s_at	ENSG00000172239	poly(A) binding protein interacting protein 1 [Source:HGNC Symbol;Acc:HGNC:16945]	chr5	43526267	43557758	-1	p12	PAIP1	38.36	protein_coding	3391
0.0032434	0.443	1.729	0.681	229886_at	ENSG00000172244	chromosome 5 open reading frame 34 [Source:HGNC Symbol;Acc:HGNC:24738]	chr5	43486709	43515148	-1	p12	C5orf34	37.91	protein_coding	3006
0.0056507	0.458	0.679	0.884	228315_at	ENSG00000172667	zinc finger matrin-type 3 [Source:HGNC Symbol;Acc:HGNC:29983]	chr3	178960121	179072215	-1	q26.32	ZMAT3	39.67	protein_coding	11298
0.0075596	0.458	0.626	0.772	225725_at	ENSG00000172667	zinc finger matrin-type 3 [Source:HGNC Symbol;Acc:HGNC:29983]	chr3	178960121	179072215	-1	q26.32	ZMAT3	39.67	protein_coding	11298
0.0052851	0.458	0.617	0.746	227221_at	ENSG00000172667	zinc finger matrin-type 3 [Source:HGNC Symbol;Acc:HGNC:29983]	chr3	178960121	179072215	-1	q26.32	ZMAT3	39.67	protein_coding	11298
0.0025819	0.407	1.746	0.726	201897_s_at	ENSG00000173207	CDC28 protein kinase regulatory subunit 1B [Source:HGNC Symbol;Acc:HGNC:19083]	chr1	154974653	154979251	1	q21.3	CKS1B	44.4	protein_coding	2340
0.003843	0.449	2.103	0.591	229997_at	ENSG00000173218	VANGL planar cell polarity protein 1 [Source:HGNC Symbol;Acc:HGNC:15512]	chr1	115641970	115698224	1	p13.1	VANGL1	45.32	protein_coding	9045
0.0034662	0.449	1.647	0.741	229134_at	ENSG00000173218	VANGL planar cell polarity protein 1 [Source:HGNC Symbol;Acc:HGNC:15512]	chr1	115641970	115698224	1	p13.1	VANGL1	45.32	protein_coding	9045
0.000942	0.325	2.06	0.623	229492_at	ENSG00000173218	VANGL planar cell polarity protein 1 [Source:HGNC Symbol;Acc:HGNC:15512]	chr1	115641970	115698224	1	p13.1	VANGL1	45.32	protein_coding	9045
0.0037482	0.449	0.576	0.646	202561_at	ENSG00000173273	tankyrase [Source:HGNC Symbol;Acc:HGNC:11941]	chr8	9555912	9782346	1	p23.1	TNKS	37.08	protein_coding	14188
0.0077857	0.458	0.496	0.485	228096_at	ENSG00000173436	mitochondrial contact site and cristae organizing system subunit 10 [Source:HGNC Symbol;Acc:HGNC:32068]	chr1	19484403	19629821	1	p36.13	MICOS10	45	protein_coding	5480
0.0073086	0.458	1.935	0.49	203114_at	ENSG00000173465	zinc ribbon domain containing 2 [Source:HGNC Symbol;Acc:HGNC:11328]	chr11	65570460	65573942	1	q13.1	ZNRD2	61.24	protein_coding	1978
0.0016735	0.38	0.521	0.541	212549_at	ENSG00000173757	signal transducer and activator of transcription 5B [Source:HGNC Symbol;Acc:HGNC:11367]	chr17	42199177	42276707	-1	q21.2	STAT5B	43.63	protein_coding	6438
0.00923	0.468	1.439	0.876	204717_s_at	ENSG00000174669	solute carrier family 29 member 2 [Source:HGNC Symbol;Acc:HGNC:11004]	chr11	66362521	66372214	-1	q13.2	SLC29A2	58.27	protein_coding	2720
0.0014834	0.364	1.235	1.815	204836_at	ENSG00000178445	glycine decarboxylase [Source:HGNC Symbol;Acc:HGNC:4313]	chr9	6532467	6645729	-1	p24.1	GLDC	44.29	protein_coding	8882
0.0091658	0.468	1.843	0.501	218539_at	ENSG00000178974	F-box protein 34 [Source:HGNC Symbol;Acc:HGNC:20201]	chr14	55271344	55370053	1	q22.3	FBXO34	41.22	protein_coding	5580
0.0020881	0.399	1.557	0.823	230361_at	ENSG00000179832	maestro heat like repeat family member 1 [Source:HGNC Symbol;Acc:HGNC:26958]	chr8	144148016	144261927	1	q24.3	MROH1	53.17	protein_coding	10889
0.0054943	0.458	1.672	0.71	209899_s_at	ENSG00000179950	poly(U) binding splicing factor 60 [Source:HGNC Symbol;Acc:HGNC:17042]	chr8	143816344	143829352	-1	q24.3	PUF60	61.8	protein_coding	4917
0.0072712	0.458	1.267	1.247	241672_at	ENSG00000180440	serine rich and transmembrane domain containing 1 [Source:HGNC Symbol;Acc:HGNC:33792]	chr13	36674020	36697839	1	q13.3	SERTM1	39.42	protein_coding	3099
0.0010992	0.325	1.349	1.143	242592_at	ENSG00000180998	G protein-coupled receptor 137C [Source:HGNC Symbol;Acc:HGNC:25445]	chr14	52552836	52637713	1	q22.1	GPR137C	37.43	protein_coding	6505
0.0053632	0.458	0.759	1.281	213222_at	ENSG00000182621	phospholipase C beta 1 [Source:HGNC Symbol;Acc:HGNC:15917]	chr20	8077251	8968360	1	p12.3	PLCB1	38.19	protein_coding	17412
0.0014498	0.364	1.726	0.698	207183_at	ENSG00000183150	G protein-coupled receptor 19 [Source:HGNC Symbol;Acc:HGNC:4473]	chr12	12660890	12696207	-1	p13.1	GPR19	41.27	protein_coding	2624
0.0053062	0.458	1.897	0.5	205598_at	ENSG00000183763	TRAF interacting protein [Source:HGNC Symbol;Acc:HGNC:30764]	chr3	49828601	49856574	-1	p21.31	TRAIP	49.84	protein_coding	3261
0.007222	0.458	0.535	0.542	221702_s_at	ENSG00000184277	TM2 domain containing 3 [Source:HGNC Symbol;Acc:HGNC:24128]	chr15	101621444	101652391	-1	q26.3	TM2D3	40.91	protein_coding	11894
0.0017812	0.38	1.378	1.073	219211_at	ENSG00000184979	ubiquitin specific peptidase 18 [Source:HGNC Symbol;Acc:HGNC:12616]	chr22	18150170	18177397	1	q11.21	USP18	47.99	protein_coding	1858
0.0047184	0.458	0.693	0.899	209120_at	ENSG00000185551	nuclear receptor subfamily 2 group F member 2 [Source:HGNC Symbol;Acc:HGNC:7976]	chr15	96325938	96340263	1	q26.2	NR2F2	48.74	protein_coding	6476
0.0068727	0.458	0.726	1.029	215073_s_at	ENSG00000185551	nuclear receptor subfamily 2 group F member 2 [Source:HGNC Symbol;Acc:HGNC:7976]	chr15	96325938	96340263	1	q26.2	NR2F2	48.74	protein_coding	6476
0.0038781	0.449	0.669	0.892	209119_x_at	ENSG00000185551	nuclear receptor subfamily 2 group F member 2 [Source:HGNC Symbol;Acc:HGNC:7976]	chr15	96325938	96340263	1	q26.2	NR2F2	48.74	protein_coding	6476
0.0042529	0.454	0.666	0.839	209121_x_at	ENSG00000185551	nuclear receptor subfamily 2 group F member 2 [Source:HGNC Symbol;Acc:HGNC:7976]	chr15	96325938	96340263	1	q26.2	NR2F2	48.74	protein_coding	6476
0.0088065	0.464	0.905	3.201	209560_s_at	ENSG00000185559	delta like non-canonical Notch ligand 1 [Source:HGNC Symbol;Acc:HGNC:2907]	chr14	100725705	100738224	1	q32.2	DLK1	55.89	protein_coding	5247
0.0043926	0.456	1.874	0.556	218151_x_at	ENSG00000185803	solute carrier family 52 member 2 [Source:HGNC Symbol;Acc:HGNC:30224]	chr8	144333957	144361286	1	q24.3	SLC52A2	60.43	protein_coding	3820
0.0066826	0.458	1.259	1.356	237395_at	ENSG00000186160	cytochrome P450 family 4 subfamily Z member 1 [Source:HGNC Symbol;Acc:HGNC:20583]	chr1	47067231	47118318	1	p33	CYP4Z1	39.82	protein_coding	2252
0.005038	0.458	1.542	0.699	207982_at	ENSG00000187475	H1.6 linker histone, cluster member [Source:HGNC Symbol;Acc:HGNC:4720]	chr6	26107412	26108135	-1	p22.2	H1-6	48.48	protein_coding	724
0.0018716	0.388	1.975	0.65	219212_at	ENSG00000187522	heat shock protein family A (Hsp70) member 14 [Source:HGNC Symbol;Acc:HGNC:29526]	chr10	14838306	14871741	1	p13	HSPA14	39.43	protein_coding	2502
0.0069646	0.458	1.592	0.63	1562412_at	ENSG00000188092	G protein-coupled receptor 89B [Source:HGNC Symbol;Acc:HGNC:13840]	chr1	147928393	147993592	1	q21.2	GPR89B	39.85	protein_coding	5214
0.0092904	0.468	1.44	0.931	204563_at	ENSG00000188404	selectin L [Source:HGNC Symbol;Acc:HGNC:10720]	chr1	169690665	169711702	-1	q24.2	SELL	38.85	protein_coding	2731
0.0099409	0.474	0.577	0.551	223228_at	ENSG00000188636	retrotransposon Gag like 6 [Source:HGNC Symbol;Acc:HGNC:13343]	chr22	44492583	44498233	-1	q13.31	RTL6	56.01	protein_coding	5419
0.0024293	0.399	0.617	0.699	37966_at	ENSG00000188677	parvin beta [Source:HGNC Symbol;Acc:HGNC:14653]	chr22	43999211	44172939	1	q13.31	PARVB	50.79	protein_coding	7368
0.0077879	0.458	0.64	0.752	204629_at	ENSG00000188677	parvin beta [Source:HGNC Symbol;Acc:HGNC:14653]	chr22	43999211	44172939	1	q13.31	PARVB	50.79	protein_coding	7368
0.0077054	0.458	1.699	0.634	1559139_at	ENSG00000188976	NOC2 like nucleolar associated transcriptional repressor [Source:HGNC Symbol;Acc:HGNC:24517]	chr1	944203	959309	-1	p36.33	NOC2L	59.54	protein_coding	5540
0.0070193	0.458	1.592	0.598	216698_x_at	ENSG00000189398	olfactory receptor family 7 subfamily E member 12 pseudogene [Source:HGNC Symbol;Acc:HGNC:8383]	chr11	3390780	3391752	-1	p15.4	OR7E12P	48.72	unprocessed_pseudogene	973
0.0008683	0.325	2.007	0.609	213858_at	ENSG00000196150	zinc finger protein 250 [Source:HGNC Symbol;Acc:HGNC:13044]	chr8	144876497	144902168	-1	q24.3	ZNF250	47.13	protein_coding	7357
0.0064138	0.458	0.726	1.072	1555950_a_at	ENSG00000196352	CD55 molecule (Cromer blood group) [Source:HGNC Symbol;Acc:HGNC:2665]	chr1	207321532	207386804	1	q32.2	CD55	36.31	protein_coding	5752
0.0038424	0.449	0.715	1.053	201925_s_at	ENSG00000196352	CD55 molecule (Cromer blood group) [Source:HGNC Symbol;Acc:HGNC:2665]	chr1	207321532	207386804	1	q32.2	CD55	36.31	protein_coding	5752
0.0031833	0.443	0.495	0.507	207760_s_at	ENSG00000196498	nuclear receptor corepressor 2 [Source:HGNC Symbol;Acc:HGNC:7673]	chr12	124324415	124567589	-1	q24.31	NCOR2	57.37	protein_coding	13975
0.0003568	0.274	0.709	1.287	225288_at	ENSG00000196739	collagen type XXVII alpha 1 chain [Source:HGNC Symbol;Acc:HGNC:22986]	chr9	114155537	114312511	1	q32	COL27A1	52.26	protein_coding	14011
0.0002982	0.274	0.647	1.122	225293_at	ENSG00000196739	collagen type XXVII alpha 1 chain [Source:HGNC Symbol;Acc:HGNC:22986]	chr9	114155537	114312511	1	q32	COL27A1	52.26	protein_coding	14011
0.002063	0.399	0.569	0.753	225292_at	ENSG00000196739	collagen type XXVII alpha 1 chain [Source:HGNC Symbol;Acc:HGNC:22986]	chr9	114155537	114312511	1	q32	COL27A1	52.26	protein_coding	14011
0.0013794	0.355	1.792	0.715	214121_x_at	ENSG00000196923	PDZ and LIM domain 7 [Source:HGNC Symbol;Acc:HGNC:22958]	chr5	177483394	177497606	-1	q35.3	PDLIM7	60.73	protein_coding	4407
0.007864	0.458	0.633	0.625	222447_at	ENSG00000197006	methyltransferase like 9 [Source:HGNC Symbol;Acc:HGNC:24586]	chr16	21597218	21657473	1	p12.2	METTL9	42.83	protein_coding	6953
0.0051935	0.458	0.63	0.769	219048_at	ENSG00000197563	phosphatidylinositol glycan anchor biosynthesis class N [Source:HGNC Symbol;Acc:HGNC:8967]	chr18	61905255	62187118	-1	q21.33	PIGN	38.03	protein_coding	19003
0.0022653	0.399	1.642	0.798	227687_at	ENSG00000198331	HYLS1 centriolar and ciliogenesis associated [Source:HGNC Symbol;Acc:HGNC:26558]	chr11	125883614	125900646	1	q24.2	HYLS1	41.34	protein_coding	2389
0.0009621	0.325	0.546	0.734	212458_at	ENSG00000198369	sprouty related EVH1 domain containing 2 [Source:HGNC Symbol;Acc:HGNC:17722]	chr2	65310851	65432637	-1	p14	SPRED2	43.76	protein_coding	5505
0.0025354	0.404	0.518	0.588	235577_at	ENSG00000198740	zinc finger protein 652 [Source:HGNC Symbol;Acc:HGNC:29147]	chr17	49289206	49362473	-1	q21.33	ZNF652	41.52	protein_coding	11813
0.007961	0.458	1.204	1.899	219454_at	ENSG00000198759	EGF like domain multiple 6 [Source:HGNC Symbol;Acc:HGNC:3235]	chrX	13569601	13633575	1	p22.2	EGFL6	40.94	protein_coding	2611
0.0070722	0.458	1.279	1.21	226936_at	ENSG00000203760	centromere protein W [Source:HGNC Symbol;Acc:HGNC:21488]	chr6	126340115	126348875	1	q22.32	CENPW	35.6	protein_coding	854
0.0077986	0.458	0.696	0.923	232968_at	ENSG00000203780	fibronectin type III and ankyrin repeat domains 1 [Source:HGNC Symbol;Acc:HGNC:23527]	chr10	125896564	126009592	1	q26.2	FANK1	41.48	protein_coding	3359
0.0081622	0.458	1.872	0.525	202026_at	ENSG00000204370	succinate dehydrogenase complex subunit D [Source:HGNC Symbol;Acc:HGNC:10683]	chr11	112086824	112120016	1	q23.1	SDHD	41.76	protein_coding	2790
0.0083169	0.458	1.513	0.86	211721_s_at	ENSG00000204519	zinc finger protein 551 [Source:HGNC Symbol;Acc:HGNC:25108]	chr19	57681969	57717301	1	q13.43	ZNF551	45.44	protein_coding	4703
0.0062672	0.458	0.614	0.617	227514_at	ENSG00000205730	ITPRIP like 2 [Source:HGNC Symbol;Acc:HGNC:27257]	chr16	19113932	19121629	1	p12.3	ITPRIPL2	49.31	protein_coding	7698
0.0073371	0.458	1.528	0.731	227385_at	ENSG00000205808	phospholipid phosphatase 6 [Source:HGNC Symbol;Acc:HGNC:23682]	chr9	4662294	4665258	1	p24.1	PLPP6	47.66	protein_coding	2965
0.005574	0.458	1.421	0.998	1569616_at	ENSG00000205835	geminin coiled-coil domain containing [Source:HGNC Symbol;Acc:HGNC:40049]	chr3	190852737	190892429	-1	q28	GMNC	36.08	protein_coding	3962
0.0052708	0.458	0.506	0.502	201484_at	ENSG00000213246	SPT4 homolog, DSIF elongation factor subunit [Source:HGNC Symbol;Acc:HGNC:11467]	chr17	58345175	58353093	-1	q22	SUPT4H1	47.01	protein_coding	2079
0.0080675	0.458	1.85	0.537	204164_at	ENSG00000213445	signal-induced proliferation-associated 1 [Source:HGNC Symbol;Acc:HGNC:10885]	chr11	65638101	65650918	1	q13.1	SIPA1	60.74	protein_coding	4652
0.0016932	0.38	1.589	0.861	226710_at	ENSG00000213563	chromosome 8 open reading frame 82 [Source:HGNC Symbol;Acc:HGNC:33826]	chr8	144525733	144529132	-1	q24.3	C8orf82	67.88	protein_coding	3001
0.0098535	0.474	0.595	0.654	1554821_a_at	ENSG00000214717	zinc finger BED-type containing 1 [Source:HGNC Symbol;Acc:HGNC:447]	chrX	2486414	2500976	-1	p22.33	ZBED1	49.62	protein_coding	4764
0.0005228	0.301	0.497	0.606	228719_at	ENSG00000214941	zinc finger SWIM-type containing 7 [Source:HGNC Symbol;Acc:HGNC:26993]	chr17	15976560	15999717	-1	p12	ZSWIM7	44.09	protein_coding	2559
0.0059958	0.458	1.84	0.589	210097_s_at	ENSG00000225921	nucleolar protein 7 [Source:HGNC Symbol;Acc:HGNC:21040]	chr6	13615335	13632739	1	p23	NOL7	38.68	protein_coding	2364
0.005799	0.458	1.869	0.567	202882_x_at	ENSG00000225921	nucleolar protein 7 [Source:HGNC Symbol;Acc:HGNC:21040]	chr6	13615335	13632739	1	p23	NOL7	38.68	protein_coding	2364
0.0031702	0.443	1.51	0.76	1556667_at	ENSG00000226124	formiminotransferase cyclodeaminase N-terminal like [Source:HGNC Symbol;Acc:HGNC:48661]	chr2	199760544	199851192	-1	q33.1	FTCDNL1	40.09	protein_coding	2777
0.000376	0.277	2.12	0.658	204561_x_at	ENSG00000234906	apolipoprotein C2 [Source:HGNC Symbol;Acc:HGNC:609]	chr19	44946035	44949565	1	q13.32	APOC2	53.36	protein_coding	1263
0.0076693	0.458	0.559	0.542	224686_x_at	ENSG00000238083	leucine rich repeat containing 37 member A2 [Source:HGNC Symbol;Acc:HGNC:32404]	chr17	46511511	46555650	1	q21.31	LRRC37A2	42.64	protein_coding	6756
0.0089445	0.464	1.304	0.931	204039_at	ENSG00000245848	CCAAT enhancer binding protein alpha [Source:HGNC Symbol;Acc:HGNC:1833]	chr19	33299934	33302534	-1	q13.11	CEBPA	65.86	protein_coding	2601
0.0093704	0.468	0.747	1.015	232878_at	ENSG00000247809	NR2F2 antisense RNA 1 [Source:HGNC Symbol;Acc:HGNC:44222]	chr15	96110040	96327361	-1	q26.2	NR2F2-AS1	40.51	lncRNA	10503
0.0054877	0.458	0.481	0.477	225494_at	ENSG00000264364	dynein light chain LC8-type 2 [Source:HGNC Symbol;Acc:HGNC:24596]	chr17	58083419	58095542	1	q22	DYNLL2	49	protein_coding	6807
0.0037379	0.449	0.455	0.465	212544_at	ENSG00000273611	zinc finger HIT-type containing 3 [Source:HGNC Symbol;Acc:HGNC:12309]	chr17	36486629	36499310	1	q12	ZNHIT3	45.77	protein_coding	6687
0.0050548	0.458	0.579	0.601	226657_at	ENSG00000274180	N-acetyltransferase domain containing 1 [Source:HGNC Symbol;Acc:HGNC:30770]	chr17	21238870	21253410	-1	p11.2	NATD1	58.51	protein_coding	4931
0.000968	0.325	1.642	0.862	232193_at
0.0083448	0.458	0.671	0.924	213637_at	ENSG00000278053	DExD-box helicase 52 [Source:HGNC Symbol;Acc:HGNC:20038]	chr17	37609739	37643446	-1	q12	DDX52	39.55	protein_coding	9528
0.0023581	0.399	0.502	0.569	224479_s_at	ENSG00000278845	mitochondrial ribosomal protein L45 [Source:HGNC Symbol;Acc:HGNC:16651]	chr17	38297023	38323217	1	q12	MRPL45	45.17	protein_coding	1704

## Sheet: GSE63885 OS
Parametric p-value	FDR	Hazard Ratio	SD of log intensities	ProbeSet	Gene_ID	Gene_description	Chromosome_scaffold_name	Gene_start_bp	Gene_end_bp	Strand	Karyotype_band	Gene_name	Gene_GC_content	Gene_type	Gene_Length
0.0056744	0.502	0.559	0.582	207871_s_at	ENSG00000004866	suppression of tumorigenicity 7 [Source:HGNC Symbol;Acc:HGNC:11351]	chr7	116953238	117230176	1	q31.2	ST7	39.15	protein_coding	6526
0.0006713	0.362	1.469	0.99	242940_x_at	ENSG00000006377	distal-less homeobox 6 [Source:HGNC Symbol;Acc:HGNC:2919]	chr7	97005553	97011040	1	q21.3	DLX6	49.51	protein_coding	3445
3.04e-05	0.157	2.43	0.553	239309_at	ENSG00000006377	distal-less homeobox 6 [Source:HGNC Symbol;Acc:HGNC:2919]	chr7	97005553	97011040	1	q21.3	DLX6	49.51	protein_coding	3445
0.0003918	0.314	1.37	1.486	235795_at	ENSG00000007372	paired box 6 [Source:HGNC Symbol;Acc:HGNC:8620]	chr11	31784779	31817961	-1	p13	PAX6	49.68	protein_coding	20639
0.0039484	0.502	1.501	0.856	205646_s_at	ENSG00000007372	paired box 6 [Source:HGNC Symbol;Acc:HGNC:8620]	chr11	31784779	31817961	-1	p13	PAX6	49.68	protein_coding	20639
0.0007268	0.362	1.956	0.704	228638_at	ENSG00000009780	family with sequence similarity 76 member A [Source:HGNC Symbol;Acc:HGNC:28530]	chr1	27725961	27763116	1	p35.3	FAM76A	43.38	protein_coding	4046
0.0081356	0.502	0.52	0.576	227802_at	ENSG00000018189	RUN and FYVE domain containing 3 [Source:HGNC Symbol;Acc:HGNC:30285]	chr4	70704204	70808619	1	q13.3	RUFY3	39.9	protein_coding	9405
0.001858	0.442	0.451	0.539	217497_at	ENSG00000025708	thymidine phosphorylase [Source:HGNC Symbol;Acc:HGNC:3148]	chr22	50525752	50530032	-1	q13.33	TYMP	64.42	protein_coding	3600
0.0050404	0.502	0.446	0.467	209940_at	ENSG00000041880	poly(ADP-ribose) polymerase family member 3 [Source:HGNC Symbol;Acc:HGNC:273]	chr3	51942345	51948867	1	p21.2	PARP3	59.21	protein_coding	3198
0.0062295	0.502	1.798	0.589	212002_at	ENSG00000055070	SUZ RNA binding domain containing 1 [Source:HGNC Symbol;Acc:HGNC:30232]	chr1	16352575	16398145	1	p36.13	SZRD1	48.1	protein_coding	4742
0.0072334	0.502	2.362	0.425	234106_s_at	ENSG00000059122	FLYWCH-type zinc finger 1 [Source:HGNC Symbol;Acc:HGNC:25404]	chr16	2911931	2951208	1	p13.3	FLYWCH1	52.32	protein_coding	8425
0.0007855	0.379	0.306	0.423	217937_s_at	ENSG00000061273	histone deacetylase 7 [Source:HGNC Symbol;Acc:HGNC:14067]	chr12	47782722	47833132	-1	q13.11	HDAC7	54.88	protein_coding	9928
0.0071068	0.502	0.443	0.493	213700_s_at	ENSG00000067225	pyruvate kinase M1/2 [Source:HGNC Symbol;Acc:HGNC:9021]	chr15	72199029	72231822	-1	q23	PKM	48.38	protein_coding	8571
0.0092956	0.508	1.425	0.885	204364_s_at	ENSG00000068615	receptor accessory protein 1 [Source:HGNC Symbol;Acc:HGNC:25786]	chr2	86213993	86338083	-1	p11.2	REEP1	46.05	protein_coding	5846
0.0059229	0.502	0.622	0.798	204908_s_at	ENSG00000069399	BCL3 transcription coactivator [Source:HGNC Symbol;Acc:HGNC:998]	chr19	44747705	44760044	1	q13.32	BCL3	58.73	protein_coding	3094
0.0073125	0.502	0.472	0.462	225675_at	ENSG00000070269	transmembrane protein 260 [Source:HGNC Symbol;Acc:HGNC:20185]	chr14	56488354	56650606	1	q22.3	TMEM260	39.13	protein_coding	8072
0.0028382	0.486	1.435	1.044	208727_s_at	ENSG00000070831	cell division cycle 42 [Source:HGNC Symbol;Acc:HGNC:1736]	chr1	22025511	22101360	1	p36.12	CDC42	43.81	protein_coding	16278
0.0004594	0.323	2.348	0.602	226400_at	ENSG00000070831	cell division cycle 42 [Source:HGNC Symbol;Acc:HGNC:1736]	chr1	22025511	22101360	1	p36.12	CDC42	43.81	protein_coding	16278
0.0005113	0.324	2.695	0.469	209151_x_at	ENSG00000071564	transcription factor 3 [Source:HGNC Symbol;Acc:HGNC:11633]	chr19	1609290	1652615	-1	p13.3	TCF3	59.56	protein_coding	6090
0.0021167	0.455	0.548	0.599	204949_at	ENSG00000076662	intercellular adhesion molecule 3 [Source:HGNC Symbol;Acc:HGNC:5346]	chr19	10333776	10339661	-1	p13.2	ICAM3	55.88	protein_coding	2788
0.0043836	0.502	0.464	0.513	225174_at	ENSG00000077232	DnaJ heat shock protein family (Hsp40) member C10 [Source:HGNC Symbol;Acc:HGNC:24637]	chr2	182716255	182794464	1	q32.1	DNAJC10	36.29	protein_coding	25053
0.0009711	0.403	0.414	0.523	241954_at	ENSG00000079459	farnesyl-diphosphate farnesyltransferase 1 [Source:HGNC Symbol;Acc:HGNC:3629]	chr8	11795573	11839304	1	p23.1	FDFT1	44.37	protein_coding	5197
0.0009912	0.403	0.464	0.545	208647_at	ENSG00000079459	farnesyl-diphosphate farnesyltransferase 1 [Source:HGNC Symbol;Acc:HGNC:3629]	chr8	11795573	11839304	1	p23.1	FDFT1	44.37	protein_coding	5197
0.0025074	0.485	0.505	0.584	210950_s_at	ENSG00000079459	farnesyl-diphosphate farnesyltransferase 1 [Source:HGNC Symbol;Acc:HGNC:3629]	chr8	11795573	11839304	1	p23.1	FDFT1	44.37	protein_coding	5197
0.003633	0.502	1.801	0.608	216969_s_at	ENSG00000079616	kinesin family member 22 [Source:HGNC Symbol;Acc:HGNC:6391]	chr16	29790719	29805384	1	p11.2	KIF22	50.18	protein_coding	4311
0.0030558	0.49	1.759	0.793	214021_x_at	ENSG00000082781	integrin subunit beta 5 [Source:HGNC Symbol;Acc:HGNC:6160]	chr3	124761948	124901418	-1	q21.2	ITGB5	46.61	protein_coding	6515
0.002607	0.486	1.964	0.539	216361_s_at	ENSG00000083168	lysine acetyltransferase 6A [Source:HGNC Symbol;Acc:HGNC:13013]	chr8	41929479	42051994	-1	p11.21	KAT6A	38.89	protein_coding	24143
0.0001979	0.255	3.273	0.398	208701_at	ENSG00000084234	amyloid beta precursor like protein 2 [Source:HGNC Symbol;Acc:HGNC:598]	chr11	130068147	130144811	1	q24.3	APLP2	43.97	protein_coding	7463
0.0053789	0.502	0.464	0.482	221931_s_at	ENSG00000085415	SEH1 like nucleoporin [Source:HGNC Symbol;Acc:HGNC:30379]	chr18	12947133	12987536	1	p11.21	SEH1L	43.55	protein_coding	10481
0.0086745	0.502	0.484	0.444	209236_at	ENSG00000089057	solute carrier family 23 member 2 [Source:HGNC Symbol;Acc:HGNC:10973]	chr20	4852356	5010293	-1	p13	SLC23A2	44.93	protein_coding	7526
0.006628	0.502	2.054	0.461	222727_s_at	ENSG00000089060	solute carrier family 8 member B1 [Source:HGNC Symbol;Acc:HGNC:26175]	chr12	113298759	113359493	-1	q24.13	SLC8B1	49.93	protein_coding	6768
0.0087497	0.502	1.698	0.678	211823_s_at	ENSG00000089159	paxillin [Source:HGNC Symbol;Acc:HGNC:9718]	chr12	120210439	120265771	-1	q24.23	PXN	53.01	protein_coding	7460
0.005172	0.502	0.532	0.621	238613_at	ENSG00000091436	mitogen-activated protein kinase kinase kinase 20 [Source:HGNC Symbol;Acc:HGNC:17797]	chr2	173075435	173268015	1	q31.1	MAP3K20	38.91	protein_coding	13804
0.0035653	0.502	0.682	0.926	209583_s_at	ENSG00000091972	CD200 molecule [Source:HGNC Symbol;Acc:HGNC:7203]	chr3	112332347	112362812	1	q13.2	CD200	38.61	protein_coding	2991
0.0067	0.502	0.706	0.948	209582_s_at	ENSG00000091972	CD200 molecule [Source:HGNC Symbol;Acc:HGNC:7203]	chr3	112332347	112362812	1	q13.2	CD200	38.61	protein_coding	2991
0.0018351	0.442	2.245	0.507	223449_at	ENSG00000092421	semaphorin 6A [Source:HGNC Symbol;Acc:HGNC:10738]	chr5	116443555	116574823	-1	q23.1	SEMA6A	40.55	protein_coding	10906
0.0051108	0.502	1.895	0.572	210461_s_at	ENSG00000099204	actin binding LIM protein 1 [Source:HGNC Symbol;Acc:HGNC:78]	chr10	114431113	114768061	-1	q25.3	ABLIM1	42.03	protein_coding	10231
0.0070121	0.502	0.671	0.907	218736_s_at	ENSG00000099260	palmdelphin [Source:HGNC Symbol;Acc:HGNC:15846]	chr1	99646113	99694541	1	p21.2	PALMD	37.49	protein_coding	8074
0.0003741	0.314	0.514	0.745	239084_at	ENSG00000099940	synaptosome associated protein 29 [Source:HGNC Symbol;Acc:HGNC:11133]	chr22	20859007	20891214	1	q11.21	SNAP29	48.84	protein_coding	4925
0.0083415	0.502	2.203	0.434	206184_at	ENSG00000099942	CRK like proto-oncogene, adaptor protein [Source:HGNC Symbol;Acc:HGNC:2363]	chr22	20917407	20953747	1	q11.21	CRKL	45.77	protein_coding	5342
0.0099345	0.511	0.606	0.647	202929_s_at	ENSG00000099977	D-dopachrome tautomerase [Source:HGNC Symbol;Acc:HGNC:2732]	chr22	23971365	23979828	-1	q11.23	DDT	53.26	protein_coding	1410
0.0003671	0.314	0.37	0.506	223647_x_at	ENSG00000100209	HscB mitochondrial iron-sulfur cluster cochaperone [Source:HGNC Symbol;Acc:HGNC:28913]	chr22	28742039	28757515	1	q12.1	HSCB	46.7	protein_coding	1454
0.0067743	0.502	0.682	0.789	200670_at	ENSG00000100219	X-box binding protein 1 [Source:HGNC Symbol;Acc:HGNC:12801]	chr22	28794555	28800597	-1	q12.1	XBP1	44.93	protein_coding	3028
0.0002892	0.314	0.326	0.486	202221_s_at	ENSG00000100393	E1A binding protein p300 [Source:HGNC Symbol;Acc:HGNC:3373]	chr22	41092592	41180077	1	q13.2	EP300	42.02	protein_coding	11692
0.0060238	0.502	2.278	0.466	222045_s_at	ENSG00000100982	phosphorylated CTD interacting factor 1 [Source:HGNC Symbol;Acc:HGNC:16200]	chr20	45934683	45948023	1	q13.12	PCIF1	53.8	protein_coding	3164
0.0084286	0.502	1.38	1.04	208879_x_at	ENSG00000101161	pre-mRNA processing factor 6 [Source:HGNC Symbol;Acc:HGNC:15860]	chr20	63981132	64033100	1	q13.33	PRPF6	50.53	protein_coding	3047
0.0043081	0.502	1.71	0.608	236514_at	ENSG00000101473	acyl-CoA thioesterase 8 [Source:HGNC Symbol;Acc:HGNC:15919]	chr20	45841721	45857405	-1	q13.12	ACOT8	49.07	protein_coding	4354
0.0085558	0.502	0.477	0.485	226567_at	ENSG00000101557	ubiquitin specific peptidase 14 [Source:HGNC Symbol;Acc:HGNC:12612]	chr18	158383	214629	1	p11.32	USP14	38.05	protein_coding	5987
0.0047068	0.502	0.443	0.443	218827_s_at	ENSG00000101639	centrosomal protein 192 [Source:HGNC Symbol;Acc:HGNC:25515]	chr18	12991362	13125052	1	p11.21	CEP192	40.44	protein_coding	9901
0.0009126	0.403	0.394	0.477	205584_at	ENSG00000101901	ALG13 UDP-N-acetylglucosaminyltransferase subunit [Source:HGNC Symbol;Acc:HGNC:30881]	chrX	111665811	111760649	1	q23	ALG13	37.51	protein_coding	8188
0.0083733	0.502	0.575	0.628	205583_s_at	ENSG00000101901	ALG13 UDP-N-acetylglucosaminyltransferase subunit [Source:HGNC Symbol;Acc:HGNC:30881]	chrX	111665811	111760649	1	q23	ALG13	37.51	protein_coding	8188
0.0013029	0.429	0.631	0.853	202862_at	ENSG00000103876	fumarylacetoacetate hydrolase [Source:HGNC Symbol;Acc:HGNC:3579]	chr15	80152490	80186946	1	q25.1	FAH	49.96	protein_coding	10161
0.0037903	0.502	1.875	0.574	213577_at	ENSG00000104549	squalene epoxidase [Source:HGNC Symbol;Acc:HGNC:11279]	chr8	124998497	125022283	1	q24.13	SQLE	37.59	protein_coding	4305
0.0095729	0.511	0.491	0.487	227016_at	ENSG00000104714	glutamate rich 1 [Source:HGNC Symbol;Acc:HGNC:27234]	chr8	614746	738106	-1	p23.3	ERICH1	51.17	protein_coding	9711
0.0095434	0.511	1.972	0.502	212974_at	ENSG00000105339	DENN domain containing 3 [Source:HGNC Symbol;Acc:HGNC:29134]	chr8	141117278	141195808	1	q24.3	DENND3	51.59	protein_coding	14693
0.0054649	0.502	0.483	0.484	1554479_a_at	ENSG00000105483	caspase recruitment domain family member 8 [Source:HGNC Symbol;Acc:HGNC:17057]	chr19	48180770	48255946	-1	q13.33	CARD8	44.39	protein_coding	13219
0.0029949	0.487	0.526	0.627	226808_at	ENSG00000106479	zinc finger protein 862 [Source:HGNC Symbol;Acc:HGNC:34519]	chr7	149838375	149867479	1	q36.1	ZNF862	48.91	protein_coding	8422
0.0077044	0.502	1.743	0.63	217785_s_at	ENSG00000106636	YKT6 v-SNARE homolog [Source:HGNC Symbol;Acc:HGNC:16959]	chr7	44200959	44214294	1	p13	YKT6	48.13	protein_coding	7683
0.0028856	0.486	2.151	0.498	214216_s_at	ENSG00000107929	La ribonucleoprotein 4B [Source:HGNC Symbol;Acc:HGNC:28987]	chr10	806914	931705	-1	p15.3	LARP4B	42.7	protein_coding	11610
0.000183	0.255	0.333	0.501	218264_at	ENSG00000107949	BRCA2 and CDKN1A interacting protein [Source:HGNC Symbol;Acc:HGNC:978]	chr10	125823546	125853695	1	q26.2	BCCIP	42.86	protein_coding	4496
0.0017805	0.442	1.447	1.172	225869_s_at	ENSG00000110057	unc-93 homolog B1, TLR signaling regulator [Source:HGNC Symbol;Acc:HGNC:13481]	chr11	67991100	68004982	-1	q13.2	UNC93B1	58.6	protein_coding	3536
0.0088309	0.502	2.304	0.46	234237_s_at	ENSG00000110497	autophagy and beclin 1 regulator 1 [Source:HGNC Symbol;Acc:HGNC:25990]	chr11	46396414	46594125	-1	p11.2	AMBRA1	43.63	protein_coding	7673
0.008188	0.502	1.669	0.704	214734_at	ENSG00000110723	exophilin 5 [Source:HGNC Symbol;Acc:HGNC:30578]	chr11	108505435	108593768	-1	q22.3	EXPH5	41.4	protein_coding	10944
0.0033183	0.502	0.545	0.693	208838_at	ENSG00000111530	cullin associated and neddylation dissociated 1 [Source:HGNC Symbol;Acc:HGNC:30688]	chr12	67269358	67319953	1	q14.3	CAND1	36.87	protein_coding	13580
0.0038762	0.502	0.49	0.594	243910_x_at	ENSG00000111530	cullin associated and neddylation dissociated 1 [Source:HGNC Symbol;Acc:HGNC:30688]	chr12	67269358	67319953	1	q14.3	CAND1	36.87	protein_coding	13580
0.0005243	0.324	0.494	0.731	226934_at	ENSG00000111605	cleavage and polyadenylation specific factor 6 [Source:HGNC Symbol;Acc:HGNC:13871]	chr12	69239569	69274358	1	q15	CPSF6	35.75	protein_coding	8050
0.002906	0.486	1.764	0.704	205461_at	ENSG00000111737	RAB35, member RAS oncogene family [Source:HGNC Symbol;Acc:HGNC:9774]	chr12	120095099	120117502	-1	q24.23	RAB35	55.76	protein_coding	4018
0.0020319	0.449	0.371	0.464	222741_s_at	ENSG00000112167	SAYSVFN motif domain containing 1 [Source:HGNC Symbol;Acc:HGNC:21025]	chr6	39104063	39115186	-1	p21.2	SAYSD1	41.95	protein_coding	2923
0.0052191	0.502	1.44	1.066	209314_s_at	ENSG00000112339	HBS1 like translational GTPase [Source:HGNC Symbol;Acc:HGNC:4834]	chr6	134960378	135103056	-1	q23.3	HBS1L	36.66	protein_coding	11085
0.0032152	0.502	1.993	0.546	209316_s_at	ENSG00000112339	HBS1 like translational GTPase [Source:HGNC Symbol;Acc:HGNC:4834]	chr6	134960378	135103056	-1	q23.3	HBS1L	36.66	protein_coding	11085
0.0074628	0.502	0.43	0.477	39817_s_at	ENSG00000112667	2'-deoxynucleoside 5'-phosphate N-hydrolase 1 [Source:HGNC Symbol;Acc:HGNC:21218]	chr6	43225629	43229481	-1	p21.1	DNPH1	55.28	protein_coding	1247
0.004344	0.502	0.509	0.615	228758_at	ENSG00000113916	BCL6 transcription repressor [Source:HGNC Symbol;Acc:HGNC:1001]	chr3	187721377	187745725	-1	q27.3	BCL6	47.68	protein_coding	5936
0.0079621	0.502	1.498	0.81	208624_s_at	ENSG00000114867	eukaryotic translation initiation factor 4 gamma 1 [Source:HGNC Symbol;Acc:HGNC:3296]	chr3	184314495	184335358	1	q27.1	EIF4G1	52.77	protein_coding	8752
0.0053773	0.502	1.822	0.541	219735_s_at	ENSG00000115112	transcription factor CP2 like 1 [Source:HGNC Symbol;Acc:HGNC:17925]	chr2	121216587	121285202	-1	q14.2	TFCP2L1	48.53	protein_coding	9367
0.0017765	0.442	2.087	0.557	210620_s_at	ENSG00000115207	general transcription factor IIIC subunit 2 [Source:HGNC Symbol;Acc:HGNC:4665]	chr2	27325849	27357034	-1	p23.3	GTF3C2	46.39	protein_coding	5839
0.0030715	0.49	0.631	0.806	212980_at	ENSG00000115464	ubiquitin specific peptidase 34 [Source:HGNC Symbol;Acc:HGNC:20066]	chr2	61187463	61471087	-1	p15	USP34	38.8	protein_coding	18443
0.004294	0.502	2.448	0.468	212650_at	ENSG00000115504	EH domain binding protein 1 [Source:HGNC Symbol;Acc:HGNC:29144]	chr2	62673851	63046487	1	p15	EHBP1	36.7	protein_coding	8224
0.0085039	0.502	1.711	0.621	200879_s_at	ENSG00000116016	endothelial PAS domain protein 1 [Source:HGNC Symbol;Acc:HGNC:3374]	chr2	46293667	46386697	1	p21	EPAS1	46.71	protein_coding	7291
0.0093181	0.508	0.474	0.481	224060_s_at	ENSG00000117543	diphthamide biosynthesis 5 [Source:HGNC Symbol;Acc:HGNC:24270]	chr1	100989623	101026088	-1	p21.2	DPH5	37.71	protein_coding	2970
0.0028919	0.486	0.448	0.486	222360_at	ENSG00000117543	diphthamide biosynthesis 5 [Source:HGNC Symbol;Acc:HGNC:24270]	chr1	100989623	101026088	-1	p21.2	DPH5	37.71	protein_coding	2970
0.0034262	0.502	0.596	0.747	225566_at	ENSG00000118257	neuropilin 2 [Source:HGNC Symbol;Acc:HGNC:8005]	chr2	205681990	205798133	1	q33.3	NRP2	45.88	protein_coding	13896
0.0081102	0.502	0.767	1.308	222877_at	ENSG00000118257	neuropilin 2 [Source:HGNC Symbol;Acc:HGNC:8005]	chr2	205681990	205798133	1	q33.3	NRP2	45.88	protein_coding	13896
5e-06	0.0773	0.423	0.795	204807_at	ENSG00000118600	ribitol xylosyltransferase 1 [Source:HGNC Symbol;Acc:HGNC:13530]	chr12	63779842	63809562	1	q14.2	RXYLT1	38.43	protein_coding	7769
0.0012982	0.429	2.273	0.495	1555439_at	ENSG00000119041	general transcription factor IIIC subunit 3 [Source:HGNC Symbol;Acc:HGNC:4666]	chr2	196763035	196799725	-1	q33.1	GTF3C3	36.72	protein_coding	7330
0.009682	0.511	0.514	0.583	226337_at	ENSG00000120370	golgin, RAB6 interacting [Source:HGNC Symbol;Acc:HGNC:25676]	chr1	170532131	170553834	1	q24.2	GORAB	36.3	protein_coding	4159
0.0055413	0.502	2	0.447	1554986_a_at	ENSG00000120451	sorting nexin 19 [Source:HGNC Symbol;Acc:HGNC:21532]	chr11	130866250	130916479	-1	q25	SNX19	42.43	protein_coding	17308
0.0070507	0.502	0.449	0.469	226511_at	ENSG00000122741	DDB1 and CUL4 associated factor 10 [Source:HGNC Symbol;Acc:HGNC:23686]	chr9	37800554	37867666	1	p13.2	DCAF10	38.55	protein_coding	8291
0.0075773	0.502	0.631	0.791	209930_s_at	ENSG00000123405	nuclear factor, erythroid 2 [Source:HGNC Symbol;Acc:HGNC:7780]	chr12	54292111	54301015	-1	q13.13	NFE2	51.75	protein_coding	2363
0.0014354	0.438	1.904	0.685	225827_at	ENSG00000123908	argonaute RISC catalytic component 2 [Source:HGNC Symbol;Acc:HGNC:3263]	chr8	140520156	140635633	-1	q24.3	2023-08-02	51.18	protein_coding	15847
0.0087268	0.502	1.366	1.055	230543_at	ENSG00000124486	ubiquitin specific peptidase 9 X-linked [Source:HGNC Symbol;Acc:HGNC:12632]	chrX	41085445	41236579	1	p11.4	USP9X	38.54	protein_coding	14152
0.0036116	0.502	0.476	0.527	213322_at	ENSG00000124596	O-acyl-ADP-ribose deacylase 1 [Source:HGNC Symbol;Acc:HGNC:21257]	chr6	41033627	41097787	-1	p21.1	OARD1	44.19	protein_coding	6529
0.0052385	0.502	0.421	0.415	218061_at	ENSG00000124733	male-enhanced antigen 1 [Source:HGNC Symbol;Acc:HGNC:6986]	chr6	43011143	43016868	-1	p21.1	MEA1	54.79	protein_coding	3017
0.0016586	0.442	1.428	1.209	208937_s_at	ENSG00000125968	inhibitor of DNA binding 1, HLH protein [Source:HGNC Symbol;Acc:HGNC:5360]	chr20	31605283	31606515	1	q11.21	ID1	58.56	protein_coding	1233
0.0016257	0.442	0.349	0.457	219251_s_at	ENSG00000126870	dynein 2 intermediate chain 1 [Source:HGNC Symbol;Acc:HGNC:21862]	chr7	158856558	158956747	1	q36.3	DYNC2I1	46.03	protein_coding	6687
0.0012628	0.429	0.495	0.675	235470_at	ENSG00000128534	LSM8 homolog, U6 small nuclear RNA associated [Source:HGNC Symbol;Acc:HGNC:20471]	chr7	118184144	118204035	1	q31.31	LSM8	35.29	protein_coding	17309
0.0023032	0.474	0.501	0.705	228529_at	ENSG00000128534	LSM8 homolog, U6 small nuclear RNA associated [Source:HGNC Symbol;Acc:HGNC:20471]	chr7	118184144	118204035	1	q31.31	LSM8	35.29	protein_coding	17309
0.0057868	0.502	0.653	0.859	201578_at	ENSG00000128567	podocalyxin like [Source:HGNC Symbol;Acc:HGNC:9171]	chr7	131500262	131558217	-1	q32.3	PODXL	50.47	protein_coding	6893
0.0067925	0.502	0.445	0.456	210137_s_at	ENSG00000129187	dCMP deaminase [Source:HGNC Symbol;Acc:HGNC:2710]	chr4	182890060	182917936	-1	q35.1	DCTD	46.1	protein_coding	3349
0.0093374	0.508	0.451	0.432	201572_x_at	ENSG00000129187	dCMP deaminase [Source:HGNC Symbol;Acc:HGNC:2710]	chr4	182890060	182917936	-1	q35.1	DCTD	46.1	protein_coding	3349
0.0041878	0.502	0.596	0.733	1552816_at	ENSG00000130045	nucleoredoxin like 2 [Source:HGNC Symbol;Acc:HGNC:30482]	chr9	88534033	88584274	1	q22.1	NXNL2	47.83	protein_coding	2498
0.0072991	0.502	0.49	0.526	205964_at	ENSG00000130818	zinc finger protein 426 [Source:HGNC Symbol;Acc:HGNC:20725]	chr19	9523223	9538645	-1	p13.2	ZNF426	43.51	protein_coding	7546
0.0004479	0.323	0.57	0.802	219440_at	ENSG00000131831	retinoic acid induced 2 [Source:HGNC Symbol;Acc:HGNC:9835]	chrX	17800049	17861337	-1	p22.13	RAI2	45.61	protein_coding	2622
0.0069948	0.502	1.58	0.803	227196_at	ENSG00000131941	rhophilin Rho GTPase binding protein 2 [Source:HGNC Symbol;Acc:HGNC:19974]	chr19	32978592	33064888	-1	q13.11	RHPN2	48.33	protein_coding	4805
0.0024484	0.479	1.722	0.623	225863_s_at	ENSG00000131943	chromosome 19 open reading frame 12 [Source:HGNC Symbol;Acc:HGNC:25443]	chr19	29698937	29715789	-1	q12	C19orf12	50.44	protein_coding	5327
0.0029535	0.486	1.759	0.73	219926_at	ENSG00000132429	popeye domain containing 3 [Source:HGNC Symbol;Acc:HGNC:17649]	chr6	105157900	105180014	-1	q21	POPDC3	39.68	protein_coding	2280
0.0014171	0.438	0.447	0.487	201501_s_at	ENSG00000132463	G-rich RNA sequence binding factor 1 [Source:HGNC Symbol;Acc:HGNC:4610]	chr4	70815783	70839897	-1	q13.3	GRSF1	43.46	protein_coding	7736
0.0060298	0.502	1.656	0.732	231299_at	ENSG00000133612	ArfGAP with GTPase domain, ankyrin repeat and PH domain 3 [Source:HGNC Symbol;Acc:HGNC:16923]	chr7	151085831	151144436	1	q36.1	AGAP3	57.73	protein_coding	11299
0.0051653	0.502	0.546	0.652	221919_at	ENSG00000135486	heterogeneous nuclear ribonucleoprotein A1 [Source:HGNC Symbol;Acc:HGNC:5031]	chr12	54280193	54287088	1	q13.13	HNRNPA1	42.13	protein_coding	6697
0.0002471	0.294	2.206	0.65	231034_s_at	ENSG00000135540	NHS like 1 [Source:HGNC Symbol;Acc:HGNC:21021]	chr6	138422043	138692571	-1	q24.1	NHSL1	40.97	protein_coding	8741
0.0088024	0.502	1.602	0.743	216493_s_at	ENSG00000136231	insulin like growth factor 2 mRNA binding protein 3 [Source:HGNC Symbol;Acc:HGNC:28868]	chr7	23310209	23470491	-1	p15.3	IGF2BP3	41.63	protein_coding	8535
0.0061144	0.502	1.68	0.679	214250_at	ENSG00000137497	nuclear mitotic apparatus protein 1 [Source:HGNC Symbol;Acc:HGNC:8059]	chr11	72002864	72080693	-1	q13.4	NUMA1	46.62	protein_coding	15224
0.0010273	0.406	2.241	0.536	238346_s_at	ENSG00000137574	trimethylguanosine synthase 1 [Source:HGNC Symbol;Acc:HGNC:17843]	chr8	55773446	55826445	1	q12.1	TGS1	39.78	protein_coding	4562
0.0089583	0.502	1.848	0.561	217289_s_at	ENSG00000137700	solute carrier family 37 member 4 [Source:HGNC Symbol;Acc:HGNC:4061]	chr11	119024114	119030906	-1	q23.3	SLC37A4	55.91	protein_coding	6186
0.0011603	0.418	1.65	0.804	219970_at	ENSG00000137960	GIPC PDZ domain containing family member 2 [Source:HGNC Symbol;Acc:HGNC:18177]	chr1	77979542	78138444	1	p31.1	GIPC2	38.79	protein_coding	3904
0.0025588	0.486	0.571	0.739	242273_at	ENSG00000139233	LLP homolog, long-term synaptic facilitation factor [Source:HGNC Symbol;Acc:HGNC:28229]	chr12	66116555	66130750	-1	q14.3	LLPH	39.71	protein_coding	7975
0.00105	0.406	1.952	0.568	235709_at	ENSG00000139354	growth arrest specific 2 like 3 [Source:HGNC Symbol;Acc:HGNC:27475]	chr12	100573683	100628288	1	q23.1	GAS2L3	36.61	protein_coding	7425
0.0098468	0.511	1.753	0.564	241425_at	ENSG00000139496	nucleoporin 58 [Source:HGNC Symbol;Acc:HGNC:20261]	chr13	25301556	25349800	1	q12.13	NUP58	36.35	protein_coding	10395
0.0009031	0.403	0.57	0.779	228303_at	ENSG00000139629	polypeptide N-acetylgalactosaminyltransferase 6 [Source:HGNC Symbol;Acc:HGNC:4128]	chr12	51351247	51392867	-1	q13.13	GALNT6	49.89	protein_coding	7347
0.0042877	0.502	0.575	0.756	230774_at	ENSG00000140043	prostaglandin reductase 2 [Source:HGNC Symbol;Acc:HGNC:20149]	chr14	73851831	73885726	1	q24.3	PTGR2	41.79	protein_coding	6984
0.0026807	0.486	0.586	0.739	227775_at	ENSG00000140488	CUGBP Elav-like family member 6 [Source:HGNC Symbol;Acc:HGNC:14059]	chr15	72284727	72320157	-1	q23	CELF6	48.5	protein_coding	3616
0.0084527	0.502	0.519	0.561	1552632_a_at	ENSG00000141337	arylsulfatase G [Source:HGNC Symbol;Acc:HGNC:24102]	chr17	68259182	68422731	1	q24.2	ARSG	45.96	protein_coding	6583
9.7e-05	0.252	1.769	0.871	213350_at	ENSG00000142534	ribosomal protein S11 [Source:HGNC Symbol;Acc:HGNC:10384]	chr19	49496365	49499708	1	q13.33	RPS11	53.08	protein_coding	1409
0.0060046	0.502	0.569	0.585	209205_s_at	ENSG00000143013	LIM domain only 4 [Source:HGNC Symbol;Acc:HGNC:6644]	chr1	87328880	87348923	1	p22.3	LMO4	41.87	protein_coding	5421
0.006526	0.502	0.654	0.866	230369_at	ENSG00000143147	G protein-coupled receptor 161 [Source:HGNC Symbol;Acc:HGNC:23694]	chr1	168079542	168137667	-1	q24.2	GPR161	46.83	protein_coding	11417
0.0067578	0.502	0.533	0.613	232350_x_at	ENSG00000143147	G protein-coupled receptor 161 [Source:HGNC Symbol;Acc:HGNC:23694]	chr1	168079542	168137667	-1	q24.2	GPR161	46.83	protein_coding	11417
0.0059839	0.502	0.462	0.519	235961_at	ENSG00000143147	G protein-coupled receptor 161 [Source:HGNC Symbol;Acc:HGNC:23694]	chr1	168079542	168137667	-1	q24.2	GPR161	46.83	protein_coding	11417
0.0069734	0.502	1.324	1.313	200796_s_at	ENSG00000143384	MCL1 apoptosis regulator, BCL2 family member [Source:HGNC Symbol;Acc:HGNC:6943]	chr1	150560895	150579738	-1	q21.2	MCL1	47.56	protein_coding	6222
0.0022322	0.466	2.042	0.595	236224_at	ENSG00000143622	Ras like without CAAX 1 [Source:HGNC Symbol;Acc:HGNC:10023]	chr1	155897808	155911404	-1	q22	RIT1	43.8	protein_coding	4038
0.009975	0.511	1.65	0.692	236223_s_at	ENSG00000143622	Ras like without CAAX 1 [Source:HGNC Symbol;Acc:HGNC:10023]	chr1	155897808	155911404	-1	q22	RIT1	43.8	protein_coding	4038
0.0065308	0.502	1.61	0.788	1553962_s_at	ENSG00000143878	ras homolog family member B [Source:HGNC Symbol;Acc:HGNC:668]	chr2	20447074	20449440	1	p24.1	RHOB	57.46	protein_coding	2367
0.0057985	0.502	1.957	0.515	238844_s_at	ENSG00000144061	nephrocystin 1 [Source:HGNC Symbol;Acc:HGNC:7905]	chr2	110122311	110205066	-1	q13	NPHP1	39.53	protein_coding	19581
0.0014687	0.438	0.431	0.544	203927_at	ENSG00000146232	NFKB inhibitor epsilon [Source:HGNC Symbol;Acc:HGNC:7799]	chr6	44258166	44265788	-1	p21.1	NFKBIE	55.92	protein_coding	2581
0.0037585	0.502	1.782	0.763	228069_at	ENSG00000146410	mitochondrial fission regulator 2 [Source:HGNC Symbol;Acc:HGNC:21115]	chr6	136231024	136250335	-1	q23.3	MTFR2	39.81	protein_coding	2450
0.0097497	0.511	1.576	0.734	242093_at	ENSG00000147041	synaptotagmin like 5 [Source:HGNC Symbol;Acc:HGNC:15589]	chrX	38006553	38128819	1	p11.4	SYTL5	37.6	protein_coding	4820
0.0053074	0.502	1.749	0.655	223908_at	ENSG00000147099	histone deacetylase 8 [Source:HGNC Symbol;Acc:HGNC:13315]	chrX	72329516	72573101	-1	q13.1	HDAC8	40.05	protein_coding	22888
0.0036763	0.502	0.496	0.565	228778_at	ENSG00000147316	microcephalin 1 [Source:HGNC Symbol;Acc:HGNC:6954]	chr8	6406592	6648508	1	p23.1	MCPH1	42.19	protein_coding	10631
0.0080834	0.502	1.383	1.012	214040_s_at	ENSG00000148180	gelsolin [Source:HGNC Symbol;Acc:HGNC:4620]	chr9	121207794	121332843	1	q33.2	GSN	46.87	protein_coding	11018
0.0044472	0.502	1.409	1.093	218813_s_at	ENSG00000148341	SH3 domain containing GRB2 like, endophilin B2 [Source:HGNC Symbol;Acc:HGNC:10834]	chr9	129007036	129028331	-1	q34.11	SH3GLB2	55.79	protein_coding	6842
0.0070281	0.502	0.58	0.632	218411_s_at	ENSG00000151332	MAP3K12 binding inhibitory protein 1 [Source:HGNC Symbol;Acc:HGNC:20427]	chr14	36298564	36320637	-1	q13.3	MBIP	35.22	protein_coding	3423
0.0071628	0.502	0.585	0.555	220176_at	ENSG00000151413	nucleotide binding protein like [Source:HGNC Symbol;Acc:HGNC:20278]	chr14	31489956	31861224	1	q12	NUBPL	38.49	protein_coding	7590
0.0080317	0.502	0.615	0.661	242750_at	ENSG00000151611	metabolism of cobalamin associated A [Source:HGNC Symbol;Acc:HGNC:18871]	chr4	145599042	145660033	1	q31.21	MMAA	38.78	protein_coding	8375
0.0001899	0.255	0.326	0.476	222770_s_at	ENSG00000151806	GTP binding elongation factor GUF1 [Source:HGNC Symbol;Acc:HGNC:25799]	chr4	44678420	44700928	1	p12	GUF1	33.76	protein_coding	4463
0.0033671	0.502	0.492	0.536	212040_at	ENSG00000152291	trans-golgi network protein 2 [Source:HGNC Symbol;Acc:HGNC:15450]	chr2	85318020	85328296	-1	p11.2	TGOLN2	47.55	protein_coding	6952
0.0043912	0.502	1.792	0.645	1558143_a_at	ENSG00000153094	BCL2 like 11 [Source:HGNC Symbol;Acc:HGNC:994]	chr2	111119378	111168445	1	q13	BCL2L11	44.42	protein_coding	6656
0.0050423	0.502	0.475	0.513	212310_at	ENSG00000154305	MIA SH3 domain ER export factor 3 [Source:HGNC Symbol;Acc:HGNC:24008]	chr1	222618097	222668007	1	q41	MIA3	39.14	protein_coding	10155
0.0082876	0.502	0.508	0.487	226585_at	ENSG00000154328	nei like DNA glycosylase 2 [Source:HGNC Symbol;Acc:HGNC:18956]	chr8	11769639	11787345	1	p23.1	NEIL2	48.94	protein_coding	3366
0.0021007	0.455	2.095	0.567	225590_at	ENSG00000154447	SH3 domain containing ring finger 1 [Source:HGNC Symbol;Acc:HGNC:17650]	chr4	169094259	169270956	-1	q33	SH3RF1	39.24	protein_coding	5472
0.0014723	0.438	0.59	0.75	232007_at	ENSG00000155189	1-acylglycerol-3-phosphate O-acyltransferase 5 [Source:HGNC Symbol;Acc:HGNC:20886]	chr8	6708642	6761503	1	p23.1	AGPAT5	38.19	protein_coding	6236
0.0064224	0.502	0.586	0.625	218096_at	ENSG00000155189	1-acylglycerol-3-phosphate O-acyltransferase 5 [Source:HGNC Symbol;Acc:HGNC:20886]	chr8	6708642	6761503	1	p23.1	AGPAT5	38.19	protein_coding	6236
0.0089549	0.502	0.529	0.549	228324_at	ENSG00000156017	carnosine N-methyltransferase 1 [Source:HGNC Symbol;Acc:HGNC:23435]	chr9	74980790	75028423	-1	q21.13	CARNMT1	37.56	protein_coding	4840
0.0001808	0.255	1.824	0.777	235266_at	ENSG00000156802	ATPase family AAA domain containing 2 [Source:HGNC Symbol;Acc:HGNC:30123]	chr8	123319850	123416350	-1	q24.13	ATAD2	40.58	protein_coding	7100
0.0018033	0.442	0.591	0.786	1555963_x_at	ENSG00000156966	UDP-GlcNAc:betaGal beta-1,3-N-acetylglucosaminyltransferase 7 [Source:HGNC Symbol;Acc:HGNC:18811]	chr2	231395710	231401164	1	q37.1	B3GNT7	62.73	protein_coding	3639
0.0051334	0.502	0.59	0.664	1555962_at	ENSG00000156966	UDP-GlcNAc:betaGal beta-1,3-N-acetylglucosaminyltransferase 7 [Source:HGNC Symbol;Acc:HGNC:18811]	chr2	231395710	231401164	1	q37.1	B3GNT7	62.73	protein_coding	3639
0.0080984	0.502	0.549	0.558	227357_at	ENSG00000157625	TGF-beta activated kinase 1 (MAP3K7) binding protein 3 [Source:HGNC Symbol;Acc:HGNC:30681]	chrX	30827442	30975084	-1	p21.2	TAB3	38.95	protein_coding	12711
0.001688	0.442	2.062	0.55	204270_at	ENSG00000157933	SKI proto-oncogene [Source:HGNC Symbol;Acc:HGNC:10896]	chr1	2228319	2310213	1	p36.33	SKI	57.61	protein_coding	6550
0.0089357	0.502	1.64	0.615	224563_at	ENSG00000158195	WASP family member 2 [Source:HGNC Symbol;Acc:HGNC:12733]	chr1	27404230	27490167	-1	p36.11	WASF2	44.01	protein_coding	5681
0.0029033	0.486	1.888	0.61	229518_at	ENSG00000158246	terminal nucleotidyltransferase 5B [Source:HGNC Symbol;Acc:HGNC:28273]	chr1	27005020	27012850	-1	p36.11	TENT5B	55.52	protein_coding	2382
0.0019729	0.448	2.064	0.541	229671_s_at	ENSG00000159055	MIS18 kinetochore protein A [Source:HGNC Symbol;Acc:HGNC:1286]	chr21	32268228	32279049	-1	q22.11	MIS18A	40.71	protein_coding	1694
0.0047325	0.502	2.061	0.508	202046_s_at	ENSG00000160007	Rho GTPase activating protein 35 [Source:HGNC Symbol;Acc:HGNC:4591]	chr19	46860997	47005077	1	q13.32	ARHGAP35	46.43	protein_coding	11646
0.0003601	0.314	2.887	0.457	226882_x_at	ENSG00000160193	WD repeat domain 4 [Source:HGNC Symbol;Acc:HGNC:12756]	chr21	42843094	42879568	-1	q22.3	WDR4	53.71	protein_coding	2738
0.0092843	0.508	1.502	0.81	215581_s_at	ENSG00000160294	minichromosome maintenance complex component 3 associated protein [Source:HGNC Symbol;Acc:HGNC:6946]	chr21	46235133	46286297	-1	q22.3	MCM3AP	47.4	protein_coding	9570
0.0061814	0.502	2.05	0.482	1553015_a_at	ENSG00000160957	RecQ like helicase 4 [Source:HGNC Symbol;Acc:HGNC:9949]	chr8	144511288	144517845	-1	q24.3	RECQL4	65.51	protein_coding	4236
0.0011902	0.418	0.5	0.746	217529_at	ENSG00000160991	ORAI calcium release-activated calcium modulator 2 [Source:HGNC Symbol;Acc:HGNC:21667]	chr7	102433106	102456825	1	q22.1	ORAI2	54.68	protein_coding	11107
0.0081816	0.502	2.116	0.46	1554082_a_at	ENSG00000162408	nucleolar protein 9 [Source:HGNC Symbol;Acc:HGNC:26265]	chr1	6521347	6554513	-1	p36.31	NOL9	47.77	protein_coding	7271
0.008629	0.502	1.666	0.695	221276_s_at	ENSG00000162520	syncoilin, intermediate filament protein [Source:HGNC Symbol;Acc:HGNC:28897]	chr1	32679906	32703596	-1	p35.1	SYNC	47.85	protein_coding	3722
0.0051955	0.502	1.83	0.619	1560292_a_at	ENSG00000162542	transmembrane and coiled-coil domains 4 [Source:HGNC Symbol;Acc:HGNC:27393]	chr1	19682240	19799945	-1	p36.13	TMCO4	48.92	protein_coding	4027
0.006636	0.502	1.796	0.612	238506_at	ENSG00000163428	leucine rich repeat containing 58 [Source:HGNC Symbol;Acc:HGNC:26968]	chr3	120324509	120349354	-1	q13.33	LRRC58	38.96	protein_coding	7918
0.0051325	0.502	1.573	0.782	235425_at	ENSG00000163535	shugoshin 2 [Source:HGNC Symbol;Acc:HGNC:30812]	chr2	200510008	200584096	1	q33.1	SGO2	37.74	protein_coding	6336
0.0019998	0.448	2.147	0.569	221926_s_at	ENSG00000163702	interleukin 17 receptor C [Source:HGNC Symbol;Acc:HGNC:18358]	chr3	9917074	9933630	1	p25.3	IL17RC	51.21	protein_coding	4540
0.000654	0.362	0.499	0.665	220346_at	ENSG00000163738	methylenetetrahydrofolate dehydrogenase (NADP+ dependent) 2 like [Source:HGNC Symbol;Acc:HGNC:31865]	chr4	74114174	74303099	1	q13.3	MTHFD2L	36.15	protein_coding	9819
0.0085095	0.502	0.511	0.51	212749_s_at	ENSG00000163743	ring finger and CHY zinc finger domain containing 1 [Source:HGNC Symbol;Acc:HGNC:17479]	chr4	75479033	75514764	-1	q21.1	RCHY1	34.99	protein_coding	6337
0.0087352	0.502	1.68	0.765	241898_at	ENSG00000163898	lipase H [Source:HGNC Symbol;Acc:HGNC:18483]	chr3	185506262	185552588	-1	q27.2	LIPH	43.66	protein_coding	4097
0.0063232	0.502	1.632	0.664	229487_at	ENSG00000164330	EBF transcription factor 1 [Source:HGNC Symbol;Acc:HGNC:3126]	chr5	158695916	159099916	-1	q33.3	EBF1	39.97	protein_coding	6333
0.0076742	0.502	0.581	0.578	219615_s_at	ENSG00000164626	potassium two pore domain channel subfamily K member 5 [Source:HGNC Symbol;Acc:HGNC:6280]	chr6	39188971	39229475	-1	p21.2	KCNK5	51.97	protein_coding	3783
0.0080967	0.502	1.328	1.294	203953_s_at	ENSG00000165215	claudin 3 [Source:HGNC Symbol;Acc:HGNC:2045]	chr7	73768997	73770270	-1	q11.23	CLDN3	69.15	protein_coding	1274
0.00938	0.509	0.528	0.502	201855_s_at	ENSG00000166454	ATM interactor [Source:HGNC Symbol;Acc:HGNC:29034]	chr16	81035842	81047350	1	q23.2	ATMIN	44.63	protein_coding	6259
0.0054366	0.502	0.523	0.559	212684_at	ENSG00000166526	zinc finger protein 3 [Source:HGNC Symbol;Acc:HGNC:13089]	chr7	100064033	100082548	-1	q22.1	ZNF3	48.95	protein_coding	5424
0.0070929	0.502	0.556	0.572	230383_x_at	ENSG00000166750	schlafen family member 5 [Source:HGNC Symbol;Acc:HGNC:28286]	chr17	35243071	35273655	1	q12	SLFN5	41.59	protein_coding	10674
0.0004056	0.314	1.96	0.71	241733_at	ENSG00000166845	chromosome 18 open reading frame 54 [Source:HGNC Symbol;Acc:HGNC:13796]	chr18	54357906	54385218	1	q21.2	C18orf54	34.78	protein_coding	6175
0.0097377	0.511	0.467	0.477	213557_at	ENSG00000167258	cyclin dependent kinase 12 [Source:HGNC Symbol;Acc:HGNC:24224]	chr17	39461486	39564907	1	q12	CDK12	44.39	protein_coding	12196
0.0098692	0.511	0.576	0.581	225954_s_at	ENSG00000167470	midnolin [Source:HGNC Symbol;Acc:HGNC:16298]	chr19	1248553	1259143	1	p13.3	MIDN	65.96	protein_coding	4495
0.0098752	0.511	1.845	0.588	1554553_s_at	ENSG00000167645	Yip1 interacting factor homolog B, membrane trafficking protein [Source:HGNC Symbol;Acc:HGNC:30511]	chr19	38303558	38317273	-1	q13.2	YIF1B	56.12	protein_coding	4723
0.0057622	0.502	0.588	0.672	221645_s_at	ENSG00000167766	zinc finger protein 83 [Source:HGNC Symbol;Acc:HGNC:13158]	chr19	52594060	52690496	-1	q13.41	ZNF83	44.66	protein_coding	7695
0.0079087	0.502	0.593	0.617	223495_at	ENSG00000169515	coiled-coil domain containing 8 [Source:HGNC Symbol;Acc:HGNC:25367]	chr19	46410329	46413564	-1	q13.32	CCDC8	59.3	protein_coding	3236
0.0024301	0.479	0.6	0.744	223496_s_at	ENSG00000169515	coiled-coil domain containing 8 [Source:HGNC Symbol;Acc:HGNC:25367]	chr19	46410329	46413564	-1	q13.32	CCDC8	59.3	protein_coding	3236
0.0088439	0.502	1.718	0.632	213788_s_at	ENSG00000169925	bromodomain containing 3 [Source:HGNC Symbol;Acc:HGNC:1104]	chr9	134030305	134068535	-1	q34.2	BRD3	57.61	protein_coding	6885
0.0078302	0.502	0.581	0.684	219327_s_at	ENSG00000170412	G protein-coupled receptor class C group 5 member C [Source:HGNC Symbol;Acc:HGNC:13309]	chr17	74424851	74451653	1	q25.1	GPRC5C	54.5	protein_coding	7534
0.0084828	0.502	0.569	0.544	227220_at	ENSG00000170448	nuclear transcription factor, X-box binding like 1 [Source:HGNC Symbol;Acc:HGNC:18726]	chr4	47847233	47914667	-1	p12	NFXL1	35.55	protein_coding	4494
0.0087631	0.502	0.546	0.64	220183_s_at	ENSG00000170917	nudix hydrolase 6 [Source:HGNC Symbol;Acc:HGNC:8053]	chr4	122888697	122922968	-1	q28.1	NUDT6	37.44	protein_coding	6582
0.0069782	0.502	0.6	0.624	227162_at	ENSG00000171448	zinc finger and BTB domain containing 26 [Source:HGNC Symbol;Acc:HGNC:23383]	chr9	122915566	122931512	-1	q33.2	ZBTB26	40	protein_coding	4657
0.0050543	0.502	0.778	1.39	209292_at	ENSG00000172201	inhibitor of DNA binding 4, HLH protein [Source:HGNC Symbol;Acc:HGNC:5363]	chr6	19837370	19842197	1	p22.3	ID4	46.71	protein_coding	3873
0.0089467	0.502	0.718	0.983	209291_at	ENSG00000172201	inhibitor of DNA binding 4, HLH protein [Source:HGNC Symbol;Acc:HGNC:5363]	chr6	19837370	19842197	1	p22.3	ID4	46.71	protein_coding	3873
0.0065126	0.502	1.824	0.594	209878_s_at	ENSG00000173039	RELA proto-oncogene, NF-kB subunit [Source:HGNC Symbol;Acc:HGNC:9955]	chr11	65653597	65663090	-1	q13.1	RELA	55.64	protein_coding	5459
0.0039264	0.502	2.268	0.449	208987_s_at	ENSG00000173120	lysine demethylase 2A [Source:HGNC Symbol;Acc:HGNC:13606]	chr11	67119263	67258082	1	q13.2	KDM2A	42.99	protein_coding	10381
0.0007117	0.362	1.634	0.919	239818_x_at	ENSG00000173334	tribbles pseudokinase 1 [Source:HGNC Symbol;Acc:HGNC:16891]	chr8	125430358	125438403	1	q24.13	TRIB1	51.3	protein_coding	4099
0.0086603	0.502	0.664	0.805	1555579_s_at	ENSG00000173482	protein tyrosine phosphatase receptor type M [Source:HGNC Symbol;Acc:HGNC:9675]	chr18	7566782	8406861	1	p11.23	PTPRM	40.1	protein_coding	9900
0.0067494	0.502	0.762	1.165	205453_at	ENSG00000173917	homeobox B2 [Source:HGNC Symbol;Acc:HGNC:5113]	chr17	48540894	48545109	-1	q21.32	HOXB2	56.24	protein_coding	2456
0.0034295	0.502	1.869	0.693	222814_s_at	ENSG00000174276	zinc finger HIT-type containing 2 [Source:HGNC Symbol;Acc:HGNC:1177]	chr11	65116403	65117701	-1	q13.1	ZNHIT2	68.13	protein_coding	1299
0.0085578	0.502	0.522	0.502	45653_at	ENSG00000174943	potassium channel tetramerization domain containing 13 [Source:HGNC Symbol;Acc:HGNC:22234]	chr16	29905012	29926236	-1	p11.2	KCTD13	48.3	protein_coding	6458
0.0059497	0.502	0.711	1.067	205567_at	ENSG00000175264	carbohydrate sulfotransferase 1 [Source:HGNC Symbol;Acc:HGNC:1969]	chr11	45647689	45665622	-1	p11.2	CHST1	56.44	protein_coding	4666
2.55e-05	0.157	0.259	0.505	213137_s_at	ENSG00000175354	protein tyrosine phosphatase non-receptor type 2 [Source:HGNC Symbol;Acc:HGNC:9650]	chr18	12785478	12929643	-1	p11.21	PTPN2	42.19	protein_coding	8718
0.0080838	0.502	0.665	0.831	239043_at	ENSG00000176222	zinc finger protein 404 [Source:HGNC Symbol;Acc:HGNC:19417]	chr19	43872365	43901385	-1	q13.31	ZNF404	36.81	protein_coding	2477
0.0069812	0.502	1.246	1.335	210239_at	ENSG00000176842	iroquois homeobox 5 [Source:HGNC Symbol;Acc:HGNC:14361]	chr16	54930865	54934485	1	q12.2	IRX5	59.4	protein_coding	2842
0.001403	0.438	0.372	0.491	220417_s_at	ENSG00000176946	THAP domain containing 4 [Source:HGNC Symbol;Acc:HGNC:23187]	chr2	241584405	241637158	-1	q37.3	THAP4	49.66	protein_coding	2856
0.0028366	0.486	1.791	0.683	222546_s_at	ENSG00000177106	EPS8 like 2 [Source:HGNC Symbol;Acc:HGNC:21296]	chr11	694438	727727	1	p15.5	EPS8L2	59.66	protein_coding	5689
0.0045335	0.502	2.383	0.449	201373_at	ENSG00000178209	plectin [Source:HGNC Symbol;Acc:HGNC:9069]	chr8	143915153	143976734	-1	q24.3	PLEC	63.62	protein_coding	16992
0.0070593	0.502	1.598	0.751	226401_at	ENSG00000178685	poly(ADP-ribose) polymerase family member 10 [Source:HGNC Symbol;Acc:HGNC:25895]	chr8	143977153	144012772	-1	q24.3	PARP10	54.62	protein_coding	6033
0.0096488	0.511	2.061	0.483	205868_s_at	ENSG00000179295	protein tyrosine phosphatase non-receptor type 11 [Source:HGNC Symbol;Acc:HGNC:9644]	chr12	112418351	112509918	1	q24.13	PTPN11	43.16	protein_coding	7028
0.0001028	0.252	0.412	0.575	214721_x_at	ENSG00000179604	CDC42 effector protein 4 [Source:HGNC Symbol;Acc:HGNC:17147]	chr17	73283624	73312005	-1	q25.1	CDC42EP4	52.88	protein_coding	4837
0.0006432	0.362	0.447	0.551	218062_x_at	ENSG00000179604	CDC42 effector protein 4 [Source:HGNC Symbol;Acc:HGNC:17147]	chr17	73283624	73312005	-1	q25.1	CDC42EP4	52.88	protein_coding	4837
0.0045643	0.502	0.671	0.788	226778_at	ENSG00000180190	testis development related protein [Source:HGNC Symbol;Acc:HGNC:26951]	chr8	489803	545781	-1	p23.3	TDRP	42.86	protein_coding	3449
0.0064802	0.502	0.584	0.493	225201_s_at	ENSG00000180992	mitochondrial ribosomal protein L14 [Source:HGNC Symbol;Acc:HGNC:14279]	chr6	44113451	44127452	-1	p21.1	MRPL14	46.14	protein_coding	957
0.0009554	0.403	0.447	0.557	201962_s_at	ENSG00000181852	ring finger protein 41 [Source:HGNC Symbol;Acc:HGNC:18401]	chr12	56202179	56221933	-1	q13.3	RNF41	47.86	protein_coding	6533
0.0052469	0.502	0.56	0.604	214095_at	ENSG00000182199	serine hydroxymethyltransferase 2 [Source:HGNC Symbol;Acc:HGNC:10852]	chr12	57229573	57234935	1	q13.3	SHMT2	57.11	protein_coding	4592
0.0072282	0.502	1.506	0.82	200917_s_at	ENSG00000182934	SRP receptor subunit alpha [Source:HGNC Symbol;Acc:HGNC:11307]	chr11	126262938	126269144	-1	q24.2	SRPRA	49.57	protein_coding	4148
0.0061468	0.502	1.626	0.762	1555784_s_at	ENSG00000184216	interleukin 1 receptor associated kinase 1 [Source:HGNC Symbol;Acc:HGNC:6112]	chrX	154010506	154019902	-1	q28	IRAK1	61.62	protein_coding	3917
0.0019969	0.448	1.525	0.978	209872_s_at	ENSG00000184363	plakophilin 3 [Source:HGNC Symbol;Acc:HGNC:9025]	chr11	392614	404908	1	p15.5	PKP3	69.71	protein_coding	3795
0.0087321	0.502	0.588	0.632	203404_at	ENSG00000184867	armadillo repeat containing X-linked 2 [Source:HGNC Symbol;Acc:HGNC:16869]	chrX	101655281	101659850	-1	q22.1	ARMCX2	51.75	protein_coding	3548
0.0017324	0.442	1.509	1.041	213756_s_at	ENSG00000185122	heat shock transcription factor 1 [Source:HGNC Symbol;Acc:HGNC:5224]	chr8	144291591	144314720	1	q24.3	HSF1	56.87	protein_coding	5305
0.0047501	0.502	2.038	0.585	202344_at	ENSG00000185122	heat shock transcription factor 1 [Source:HGNC Symbol;Acc:HGNC:5224]	chr8	144291591	144314720	1	q24.3	HSF1	56.87	protein_coding	5305
0.0063149	0.502	0.489	0.515	220553_s_at	ENSG00000185246	pre-mRNA processing factor 39 [Source:HGNC Symbol;Acc:HGNC:20314]	chr14	45084107	45116282	1	q21.2	PRPF39	36.34	protein_coding	4924
0.0052295	0.502	0.57	0.712	51158_at	ENSG00000185442	family with sequence similarity 174 member B [Source:HGNC Symbol;Acc:HGNC:34339]	chr15	92617448	92809884	-1	q26.1	FAM174B	44.69	protein_coding	4469
0.0069023	0.502	1.396	1.083	206515_at	ENSG00000186529	cytochrome P450 family 4 subfamily F member 3 [Source:HGNC Symbol;Acc:HGNC:2646]	chr19	15640897	15662825	1	p13.12	CYP4F3	45.74	protein_coding	5517
0.0067674	0.502	0.562	0.574	209963_s_at	ENSG00000187266	erythropoietin receptor [Source:HGNC Symbol;Acc:HGNC:3416]	chr19	11377207	11384342	-1	p13.2	EPOR	57.06	protein_coding	3077
0.006102	0.502	1.432	0.947	227347_x_at	ENSG00000188290	hes family bHLH transcription factor 4 [Source:HGNC Symbol;Acc:HGNC:24149]	chr1	998962	1000172	-1	p36.33	HES4	74.32	protein_coding	1118
0.0085937	0.502	0.506	0.55	214943_s_at	ENSG00000188739	RNA binding motif protein 34 [Source:HGNC Symbol;Acc:HGNC:28965]	chr1	235131183	235161283	-1	q42.3	RBM34	44.35	protein_coding	2939
0.008663	0.502	0.535	0.575	228549_at	ENSG00000196187	transmembrane protein 63A [Source:HGNC Symbol;Acc:HGNC:29118]	chr1	225845536	225882380	-1	q42.12	TMEM63A	51.62	protein_coding	10350
0.0058804	0.502	1.819	0.622	228765_at	ENSG00000196275	GTF2I repeat domain containing 2 [Source:HGNC Symbol;Acc:HGNC:30775]	chr7	74796151	74851605	-1	q11.23	GTF2IRD2	46.6	protein_coding	8844
0.0086209	0.502	0.483	0.567	215299_x_at	ENSG00000196502	sulfotransferase family 1A member 1 [Source:HGNC Symbol;Acc:HGNC:11453]	chr16	28603944	28623625	-1	p11.2	SULT1A1	52.63	protein_coding	10161
0.0085612	0.502	1.929	0.525	213857_s_at	ENSG00000196776	CD47 molecule [Source:HGNC Symbol;Acc:HGNC:1682]	chr3	108043091	108091862	-1	q13.12	CD47	37.38	protein_coding	8234
0.0028042	0.486	2.138	0.523	211075_s_at	ENSG00000196776	CD47 molecule [Source:HGNC Symbol;Acc:HGNC:1682]	chr3	108043091	108091862	-1	q13.12	CD47	37.38	protein_coding	8234
0.0085441	0.502	1.477	0.868	234068_s_at	ENSG00000196961	adaptor related protein complex 2 subunit alpha 1 [Source:HGNC Symbol;Acc:HGNC:561]	chr19	49767001	49807114	1	q13.33	AP2A1	54.54	protein_coding	8714
0.0069621	0.502	0.464	0.528	209216_at	ENSG00000196998	WD repeat domain 45 [Source:HGNC Symbol;Acc:HGNC:28912]	chrX	49074433	49101170	-1	p11.23	WDR45	49.75	protein_coding	4691
0.0041072	0.502	0.512	0.566	217753_s_at	ENSG00000197728	ribosomal protein S26 [Source:HGNC Symbol;Acc:HGNC:10414]	chr12	56041351	56044697	1	q13.2	RPS26	47.33	protein_coding	2053
0.0063425	0.502	1.912	0.553	231022_at	ENSG00000197822	occludin [Source:HGNC Symbol;Acc:HGNC:8104]	chr5	69492292	69558104	1	q13.2	OCLN	42.9	protein_coding	11259
0.0098576	0.511	1.763	0.654	227492_at	ENSG00000197822	occludin [Source:HGNC Symbol;Acc:HGNC:8104]	chr5	69492292	69558104	1	q13.2	OCLN	42.9	protein_coding	11259
0.0079587	0.502	0.538	0.58	228718_at	ENSG00000197857	zinc finger protein 44 [Source:HGNC Symbol;Acc:HGNC:13110]	chr19	12224686	12294883	-1	p13.2	ZNF44	43.35	protein_coding	6061
0.00756	0.502	0.592	0.67	206194_at	ENSG00000198353	homeobox C4 [Source:HGNC Symbol;Acc:HGNC:5126]	chr12	54016931	54056030	1	q13.13	HOXC4	51.68	protein_coding	2767
0.0039593	0.502	0.557	0.673	212654_at	ENSG00000198467	tropomyosin 2 [Source:HGNC Symbol;Acc:HGNC:12011]	chr9	35681992	35690056	-1	p13.3	TPM2	54.9	protein_coding	3183
0.005162	0.502	1.863	0.624	223340_at	ENSG00000198513	atlastin GTPase 1 [Source:HGNC Symbol;Acc:HGNC:11231]	chr14	50532509	50634017	1	q22.1	ATL1	37.83	protein_coding	16489
0.0068838	0.502	0.596	0.741	228749_at	ENSG00000204186	zinc finger DBF-type containing 2 [Source:HGNC Symbol;Acc:HGNC:29313]	chr2	206274663	206314427	1	q33.3	ZDBF2	37.54	protein_coding	10901
0.0053918	0.502	0.568	0.701	225028_at	ENSG00000204272	negative regulator of P-body association [Source:HGNC Symbol;Acc:HGNC:50713]	chrX	56729241	56819179	1	p11.21	NBDY	45.07	protein_coding	2506
0.0067618	0.502	1.452	0.864	218302_at	ENSG00000205155	presenilin enhancer, gamma-secretase subunit [Source:HGNC Symbol;Acc:HGNC:30100]	chr19	35745600	35747519	1	q13.12	PSENEN	49.79	protein_coding	1359
0.004591	0.502	1.4	1.152	230867_at	ENSG00000206384	collagen type VI alpha 6 chain [Source:HGNC Symbol;Acc:HGNC:27023]	chr3	130560334	130678155	1	q22.1	COL6A6	39.26	protein_coding	9720
0.0035559	0.502	2.185	0.529	1564164_at	ENSG00000213047	DENN domain containing 1B [Source:HGNC Symbol;Acc:HGNC:28404]	chr1	197504748	197775696	-1	q31.3	DENND1B	34.32	protein_coding	13203
0.0016766	0.442	0.504	0.586	1558794_at	ENSG00000223482	NUTM2A antisense RNA 1 [Source:HGNC Symbol;Acc:HGNC:45161]	chr10	87201647	87342612	-1	q23.2	NUTM2A-AS1	41.08	lncRNA	22452
0.0058468	0.502	0.47	0.461	213838_at	ENSG00000225921	nucleolar protein 7 [Source:HGNC Symbol;Acc:HGNC:21040]	chr6	13615335	13632739	1	p23	NOL7	38.68	protein_coding	2364
0.0066149	0.502	1.734	0.6	236310_at	ENSG00000234420	zinc finger protein 37B, pseudogene [Source:HGNC Symbol;Acc:HGNC:13103]	chr10	42513510	42552822	-1	q11.21	ZNF37BP	39.07	transcribed_processed_pseudogene	10256
0.0019161	0.448	1.287	1.577	238022_at	ENSG00000245694	colorectal neoplasia differentially expressed [Source:HGNC Symbol;Acc:HGNC:37078]	chr16	54845189	54929189	-1	q12.2	CRNDE	39.73	lncRNA	14708
0.0066148	0.502	1.233	1.822	238021_s_at	ENSG00000245694	colorectal neoplasia differentially expressed [Source:HGNC Symbol;Acc:HGNC:37078]	chr16	54845189	54929189	-1	q12.2	CRNDE	39.73	lncRNA	14708
0.0045214	0.502	0.662	0.946	235373_at	ENSG00000247498	GPRC5D and HEBP1 antisense RNA 1 [Source:HGNC Symbol;Acc:HGNC:53599]	chr12	12927726	12984645	1	p13.1	GPRC5D-AS1	42.93	lncRNA	3420
0.0038814	0.502	0.472	0.511	1554246_at	ENSG00000253313	chromosome 1 open reading frame 210 [Source:HGNC Symbol;Acc:HGNC:28755]	chr1	43281877	43285617	-1	p34.2	C1orf210	53.81	protein_coding	1522
0.0023289	0.474	1.935	0.603	212113_at	ENSG00000253719	ataxin 7 like 3B [Source:HGNC Symbol;Acc:HGNC:37931]	chr12	74537835	74545430	1	q21.1	ATXN7L3B	38.67	protein_coding	7596
0.0054627	0.502	0.607	0.666	227092_at	ENSG00000253982	novel transcript	chr8	1761054	1764508	-1	p23.3		60.43	lncRNA	2264
0.0001387	0.255	0.356	0.524	209796_s_at	ENSG00000257727	canopy FGF signaling regulator 2 [Source:HGNC Symbol;Acc:HGNC:13529]	chr12	56309842	56316119	-1	q13.3	CNPY2	48.93	protein_coding	3019
0.0088851	0.502	2.168	0.454	216397_s_at	ENSG00000261236	BOP1 ribosomal biogenesis factor [Source:HGNC Symbol;Acc:HGNC:15519]	chr8	144262045	144291438	-1	q24.3	BOP1	62.31	protein_coding	3841
0.0089528	0.502	2.045	0.472	1556203_a_at	ENSG00000266028	SLIT-ROBO Rho GTPase activating protein 2 [Source:HGNC Symbol;Acc:HGNC:19751]	chr1	206203346	206464436	1	q32.1	SRGAP2	42.75	protein_coding	15609
0.0008478	0.397	0.44	0.566	224784_at	ENSG00000275023	MLLT6, PHD finger containing [Source:HGNC Symbol;Acc:HGNC:7138]	chr17	38705273	38729795	1	q12	MLLT6	56.46	protein_coding	13576
0.0053488	0.502	0.392	0.413	226635_at	ENSG00000281649	endogenous Bornavirus like nucleoprotein 3, pseudogene [Source:HGNC Symbol;Acc:HGNC:50682]	chr9	37079645	37090928	1	p13.2	EBLN3P	38.97	lncRNA	10492
0.0094987	0.511	0.463	0.464	225635_s_at	ENSG00000281649	endogenous Bornavirus like nucleoprotein 3, pseudogene [Source:HGNC Symbol;Acc:HGNC:50682]	chr9	37079645	37090928	1	p13.2	EBLN3P	38.97	lncRNA	10492

[truncated: 16 more sheets: GSE63885 DFS, GSE30161 OS, GSE30161 DFS, GEPIA2 OS, GEPIA2 DFS, GSE49997 OS, GSE49997 DFS, GSE17260 OS, GSE17260 DFS, GSE26712 OS, GSE26712 DFS, GSE31245 OS, GSE32062 OS GPL570, GSE32062 DFS GPL570, GSE32062 OS GPL6480, GSE32062 DFS GPL6480]
