# Supplementary material for: Identification of lncRNAs Deregulated in Epithelial Ovarian Cancer Based on a Gene Expression Profiling Meta-Analysis
Source: Int J Mol Sci. 2023 Jun 28;24(13):10798. doi: 10.3390/ijms241310798 (PMC10341812; doi:10.3390/ijms241310798)
Supplement: Supplementary file 1 [file ijms-24-10798-s001.zip › Supplementary Table S6.xlsx]

## Sheet: STS6 Title
	Supplementary Table S6.- LncRNAs associated with overall survival (OS) and disease-free survival (DFS) periods, including previous references related with EOC.

## Sheet: OS
Gene_ID	Prognosis	Previous references in EOC	Gene_description	Chromosome_scaffold_name	Gene_start_bp	Gene_end_bp	Strand	Karyotype_band	Gene_name	Gene_GC_content	Gene_type	Gene_Length
ENSG00000177410	Unfavorable	[183]	ZNFX1 antisense RNA 1 [Source:HGNC Symbol;Acc:HGNC:33101]	chr20	49278178	49299600	1	q13.13	ZFAS1	45.68	lncRNA	8315
ENSG00000245694	Unfavorable	[179]	colorectal neoplasia differentially expressed [Source:HGNC Symbol;Acc:HGNC:37078]	chr16	54845189	54929189	-1	q12.2	CRNDE	39.73	lncRNA	14708
ENSG00000228315	Unfavorable	-	GUSB pseudogene 11 [Source:HGNC Symbol;Acc:HGNC:42325]	chr22	23638487	23717356	-1	q11.23	GUSBP11	50.35	lncRNA	7764
ENSG00000267374	Unfavorable	-	MIR924 host gene [Source:HGNC Symbol;Acc:HGNC:44332]	chr18	39206917	39800322	-1	q12.3	MIR924HG	37.1	lncRNA	11735
ENSG00000287151	Unfavorable	-	chromosome 2 open reading frame 27A [Source:HGNC Symbol;Acc:HGNC:25077]	chr2	131647990	131767404	1	q21.1	C2orf27A	40.75	lncRNA	7090
ENSG00000238197	Unfavorable	-	PAXBP1 antisense RNA 1 [Source:HGNC Symbol;Acc:HGNC:39603]	chr21	32728097	32747065	1	q22.11	PAXBP1-AS1	38.77	lncRNA	10289
ENSG00000234456	Unfavorable	[41]	MAGI2 antisense RNA 3 [Source:HGNC Symbol;Acc:HGNC:40862]	chr7	79452877	79471208	1	q21.11	MAGI2-AS3	38.5	lncRNA	17783
ENSG00000206195	Unfavorable	[36]	double homeobox A pseudogene 8 [Source:HGNC Symbol;Acc:HGNC:32187]	chr22	15784959	15829984	1	q11.1	DUXAP8	41.82	lncRNA	10114
ENSG00000251321	Unfavorable	-	prostate cancer associated transcript 4 [Source:HGNC Symbol;Acc:HGNC:24853]	chr4	79827471	79877770	1	q21.21	PCAT4	35.6	lncRNA	2247
ENSG00000281162	Unfavorable	[143]	long intergenic non-protein coding RNA 1127 [Source:HGNC Symbol;Acc:HGNC:49292]	chr2	101962056	101987167	1	q11.2	LINC01127	48.1	lncRNA	3841
ENSG00000237975	Unfavorable	[206]	FLG antisense RNA 1 [Source:HGNC Symbol;Acc:HGNC:27913]	chr1	152168125	152445456	1	q21.3	FLG-AS1	40.67	lncRNA	14980
ENSG00000229694	Unfavorable	-	long intergenic non-protein coding RNA 484 [Source:NCBI gene (formerly Entrezgene);Acc:100129347]	chr9	91118592	91182762	1	q22.2	LINC00484	44.34	lncRNA	1748
ENSG00000277288	Unfavorable	[207]	long intergenic non-protein coding RNA 2881 [Source:HGNC Symbol;Acc:HGNC:51236]	chr10	44292569	44294649	1	q11.21	LINC02881	58.67	lncRNA	1714
ENSG00000236901	Unfavorable	[208]	MIR600 host gene [Source:HGNC Symbol;Acc:HGNC:23642]	chr9	123109494	123115477	-1	q33.3	MIR600HG	53.98	lncRNA	5984
ENSG00000225377	Unfavorable	[23]	NRSN2 antisense RNA 1 [Source:HGNC Symbol;Acc:HGNC:51222]	chr20	316860	348490	-1	p13	NRSN2-AS1	51.6	lncRNA	6273
ENSG00000266389	Unfavorable	-	PIK3R5 divergent transcript [Source:HGNC Symbol;Acc:HGNC:55321]	chr17	8965896	8967070	1	p13.1	PIK3R5-DT	57.36	lncRNA	402
ENSG00000291146	Unfavorable	-	RP9 pseudogene	chr7	32916810	32943176	-1		RP9P		lncRNA
ENSG00000260917	Unfavorable	-	novel transcript, overlapping to VTI1A	chr10	112823490	112827726	1	q25.2	ENSG00000260917	49.54	lncRNA	4237
ENSG00000257545	Unfavorable	-	novel transcript, antisense to POLR3B, RFX4 and RIC8B.	chr12	106495958	106774926	-1	q23.3	ENSG00000257545	42.35	lncRNA	2419
ENSG00000259341	Unfavorable	-	novel transcript	chr15	99423769	99435160	-1	q26.3	ENSG00000259341	56	lncRNA	11392
ENSG00000261069	Unfavorable	-	novel transcript, SNORD host	chr15	25087661	25088896	1	q11.2	ENSG00000261069	49.76	lncRNA	1236
ENSG00000271725	Unfavorable	-	novel transcript	chr15	81303215	81309391	-1	q25.1	ENSG00000271725	47.58	lncRNA	476
ENSG00000270020	Unfavorable	-	novel transcript	chr16	86520383	86523897	-1	q24.1	ENSG00000270020	52.09	lncRNA	3515
ENSG00000275438	Unfavorable	-	novel transcript	chr16	848525	849065	-1	p13.3	ENSG00000275438	56.56	lncRNA	541
ENSG00000266709	Unfavorable	-	novel transcript	chr17	14303854	14305505	1	p12	ENSG00000266709	52.3	lncRNA	1652
ENSG00000265752	Unfavorable	-	novel transcript	chr18	23957754	23982556	-1	q11.2	LINC02958	43.52	lncRNA	2343
ENSG00000213963	Unfavorable	-	novel transcript	chr2	177283508	177392691	-1	q31.2	ENSG00000213963	40.17	lncRNA	7171
ENSG00000229839	Unfavorable	-	novel transcript	chr2	62069447	62146881	-1	p15	ENSG00000229839	41.67	lncRNA	1836
ENSG00000270696	Unfavorable	-	novel transcript, antisense to C2orf3	chr2	75660462	75662208	1	p12	ENSG00000270696	39.27	lncRNA	1747
ENSG00000240057	Unfavorable	-	novel transcript	chr3	113019468	113184377	1	q13.2	NEPRO-AS1	41.57	lncRNA	6841
ENSG00000230074	Unfavorable	-	novel transcript	chr9	34665607	34681981	1	p13.3	ENSG00000230074	48.53	lncRNA	1410
ENSG00000290659	Unfavorable	-	novel transcript	chr17	18511262	18521252	-1		ENSG00000290659		lncRNA
ENSG00000267128	Favorable	[33]	RNF157 antisense RNA 1 [Source:HGNC Symbol;Acc:HGNC:44127]	chr17	76138432	76154650	1	q25.1	RNF157-AS1	54.16	lncRNA	4398
ENSG00000257588	Favorable	-	novel transcript, antisense to AQP5	chr12	49951512	49962924	-1	q13.12	ENSG00000257588	56.57	lncRNA	1574
ENSG00000234753	Favorable	[164]	FOXP4 antisense RNA 1 [Source:HGNC Symbol;Acc:HGNC:50332]	chr6	41494853	41548621	-1	p21.1	FOXP4-AS1	51.42	lncRNA	934
ENSG00000246523	Favorable	-	FZD4 divergent transcript [Source:HGNC Symbol;Acc:HGNC:54219]	chr11	86955616	87021909	1	q14.2	FZD4-DT	41.87	lncRNA	1988
ENSG00000261071	Favorable	[169]	novel transcript, antisense to NOL7	chr6	13614111	13615155	-1	p23	ENSG00000261071	54.16	lncRNA	1045
ENSG00000246877	Favorable	-	dynamin 1 pseudogene 35 [Source:HGNC Symbol;Acc:HGNC:35182]	chr15	75727670	75738623	-1	q24.2	DNM1P35	56.34	lncRNA	3188
ENSG00000231527	Favorable	-	family with sequence similarity 27 member C [Source:HGNC Symbol;Acc:HGNC:23668]	chr9	61854148	62096920	1	q13	FAM27C	44.33	lncRNA	15135
ENSG00000255733	Favorable	[164]	IFNG antisense RNA 1 [Source:HGNC Symbol;Acc:HGNC:43910]	chr12	67989445	68234686	1	q15	IFNG-AS1	38.65	lncRNA	4538
ENSG00000271888	Favorable	-	JARID2 divergent transcript [Source:HGNC Symbol;Acc:HGNC:55240]	chr6	15243923	15245000	-1	p22.3	JARID2-DT	53.43	lncRNA	1078
ENSG00000258279	Favorable	[209]	long intergenic non-protein coding RNA 592 [Source:HGNC Symbol;Acc:HGNC:27474]	chr12	52164115	52223813	1	q13.13	LINC00592	53.66	lncRNA	2255
ENSG00000278090	Favorable	-	leukemia-associated non-coding IGF1R activator RNA 1 [Source:HGNC Symbol;Acc:HGNC:51199]	chr15	99014526	99031054	1	q26.3	LUNAR1	48.51	lncRNA	3243
ENSG00000241657	Favorable	[210]	T cell receptor beta variable 11-2 [Source:HGNC Symbol;Acc:HGNC:12181]	chr7	142433895	142434394	1	q34	TRBV11-2	49.2	lncRNA	408
ENSG00000228863	Favorable	-	novel transcript, antisense to CD48	chr1	160670778	160699761	1	q23.3	ENSG00000228863	43.12	lncRNA	4121
ENSG00000259834	Favorable	[211]	novel transcript	chr1	110653560	110657040	-1	p13.3	ENSG00000259834	31.03	lncRNA	3481
ENSG00000278022	Favorable	-	novel transcript, sense intronic to IGF1R	chr15	98660210	98660668	1	q26.3	ENSG00000278022	45.1	lncRNA	459
ENSG00000276408	Favorable	-	novel transcript	chr16	75556392	75557059	1	q23.1	ENSG00000276408	43.26	lncRNA	668
ENSG00000263063	Favorable	-	novel transcript	chr17	82713908	82716255	-1	q25.3	ENSG00000263063	49.57	lncRNA	898
ENSG00000277901	Favorable	-	novel transcript	chr20	23320958	23325352	-1	p11.21	ENSG00000277901	45.71	lncRNA	431
ENSG00000273210	Favorable	-	novel transcript, antisense to DYRK1A	chr21	37365477	37365932	-1	q22.13	ENSG00000273210	47.15	lncRNA	456
ENSG00000272209	Favorable	-	novel transcript	chr6	13825432	13826574	1	p23	ENSG00000272209	32.28	lncRNA	1143
ENSG00000231794	Favorable	-	novel transcript, antisense to WDR91	chr7	135198401	135209837	1	q33	ENSG00000231794	43.76	lncRNA	2503
ENSG00000253982	Favorable	-	novel transcript	chr8	1761054	1764508	-1	p23.3	CLN8-AS1	60.43	lncRNA	2264
ENSG00000251637	Favorable	-	long intergenic non-protein coding RNA 2754 [Source:HGNC Symbol;Acc:HGNC:54274]	chr11	67886477	67906350	1	q13.2	LINC02754	44.7	lncRNA	3962
ENSG00000268658	Favorable	[12]	long intergenic non-protein coding RNA 664 [Source:HGNC Symbol;Acc:HGNC:44319]	chr19	21483374	21503238	1	p12	LINC00664	46.67	lncRNA	5889
ENSG00000226363	Favorable	[40]	HAGLR opposite strand lncRNA [Source:HGNC Symbol;Acc:HGNC:50646]	chr2	176177717	176179008	1	q31.1	HAGLROS	61.07	lncRNA	1121
ENSG00000234171	Favorable	[139]	RNASEH1 antisense RNA 1 [Source:HGNC Symbol;Acc:HGNC:49289]	chr2	3558474	3564842	1	p25.3	RNASEH1-AS1	47.56	lncRNA	4377
ENSG00000248538	Favorable	-	novel transcript	chr8	9151695	9425524	1	p23.1	ENSG00000248538	43.4	lncRNA	17427
ENSG00000233718	Favorable	-	MYCN opposite strand [Source:HGNC Symbol;Acc:HGNC:16911]	chr2	15918350	15942249	-1	p24.3	MYCNOS	47.76	lncRNA	5100
ENSG00000261189	Favorable	-	novel transcript, antisense to DSP	chr6	7540451	7541338	-1	p24.3	ENSG00000261189	44.82	lncRNA	888
ENSG00000223482	Favorable	-	NUTM2A antisense RNA 1 [Source:HGNC Symbol;Acc:HGNC:45161]	chr10	87201647	87342612	-1	q23.2	NUTM2A-AS1	41.08	lncRNA	22452
ENSG00000237686	Favorable	-	stem cell inhibitory RNA transcript [Source:HGNC Symbol;Acc:HGNC:55341]	chr6	43995723	44074652	-1	p21.1	SCIRT	51.47	lncRNA	2893
ENSG00000247498	Favorable	-	GPRC5D and HEBP1 antisense RNA 1 [Source:HGNC Symbol;Acc:HGNC:53599]	chr12	12927726	12984645	1	p13.1	GPRC5D-AS1	42.93	lncRNA	3420
ENSG00000237976	Favorable	[171]	RFX5 antisense RNA 1 [Source:HGNC Symbol;Acc:HGNC:40503]	chr1	151346967	151348027	1	q21.3	RFX5-AS1	51.56	lncRNA	618
ENSG00000263004	Favorable	-	AKAP1 divergent transcript [Source:HGNC Symbol;Acc:HGNC:55339]	chr17	57071814	57085024	-1	q22	AKAP1-DT	43.12	lncRNA	1540
ENSG00000231621	Favorable	-	ANKRD44 antisense RNA 1 [Source:HGNC Symbol;Acc:HGNC:41090]	chr2	197197991	197199273	1	q33.1	ANKRD44-AS1	48.17	lncRNA	455
ENSG00000266441	Favorable	-	ARHGAP28 antisense RNA 1 [Source:HGNC Symbol;Acc:HGNC:55320]	chr18	6728821	6729862	-1	p11.31	ARHGAP28-AS1	59.4	lncRNA	491
ENSG00000249599	Favorable	[212]	BMPR1B divergent transcript [Source:HGNC Symbol;Acc:HGNC:50864]	chr4	94743668	94757681	-1	q22.3	BMPR1B-DT	37.7	lncRNA	791
ENSG00000270761	Favorable	-	CD2AP divergent transcript [Source:HGNC Symbol;Acc:HGNC:55263]	chr6	47477243	47477572	-1	p12.3	CD2AP-DT	55.15	lncRNA	330
ENSG00000266903	Favorable	-	CEACAM16, CEACAM19 and PVR antisense RNA 1 [Source:HGNC Symbol;Acc:HGNC:55317]	chr19	44631573	44725217	-1	q13.32	CEACAM16-AS1	49.6	lncRNA	2430
ENSG00000271869	Favorable	-	DCTN6 divergent transcript [Source:HGNC Symbol;Acc:HGNC:55241]	chr8	30155830	30156232	-1	p12	DCTN6-DT	54.09	lncRNA	403
ENSG00000236756	Favorable	-	DNAJC9 antisense RNA 1 [Source:HGNC Symbol;Acc:HGNC:31432]	chr10	73247360	73276984	1	q22.2	DNAJC9-AS1	41.21	lncRNA	3260
ENSG00000233993	Favorable	-	DTD1 antisense RNA 1 [Source:HGNC Symbol;Acc:HGNC:40762]	chr20	18674395	18698709	-1	p11.23	DTD1-AS1	43.23	lncRNA	1695
ENSG00000281649	Favorable	-	endogenous Bornavirus like nucleoprotein 3, pseudogene [Source:HGNC Symbol;Acc:HGNC:50682]	chr9	37079645	37090928	1	p13.2	EBLN3P	38.97	lncRNA	10492
ENSG00000224157	Favorable	[146]	HLA complex group 14 [Source:HGNC Symbol;Acc:HGNC:18323]	chr6	28896530	28897322	1	p22.1	HCG14	51.58	lncRNA	413
ENSG00000206337	Favorable	[213]	HLA complex P5 [Source:HGNC Symbol;Acc:HGNC:21659]	chr6	31463170	31478936	1	p21.33	HCP5	49.39	lncRNA	11058
ENSG00000291097	Favorable	[209]	Major histocompatibility complex, class I, L (pseudogene)	chr6	30259548	30293015	1		HLA-L		lncRNA
ENSG00000228013	Favorable	[208]	IL6R antisense RNA 1 [Source:HGNC Symbol;Acc:HGNC:53716]	chr1	154402328	154406564	-1	q21.3	IL6R-AS1	56.12	lncRNA	1756
ENSG00000153363	Favorable	[214]	long intergenic non-protein coding RNA 467 [Source:HGNC Symbol;Acc:HGNC:28227]	chr1	211382736	211435570	1	q32.3	LINC00467	39.05	lncRNA	6942
ENSG00000214381	Favorable	[215]	long intergenic non-protein coding RNA 488 [Source:HGNC Symbol;Acc:HGNC:32675]	chr3	109178143	109216965	1	q13.13	LINC00488	39.49	lncRNA	3613
ENSG00000232645	Favorable	-	long intergenic non-protein coding RNA 1431 [Source:HGNC Symbol;Acc:HGNC:50744]	chr20	23356594	23358116	-1	p11.21	LINC01431	51.94	lncRNA	841
ENSG00000228397	Favorable	-	long intergenic non-protein coding RNA 1635 [Source:HGNC Symbol;Acc:HGNC:52422]	chr1	22023990	22026048	-1	p36.12	LINC01635	54.4	lncRNA	1588
ENSG00000236532	Favorable	-	long intergenic non-protein coding RNA 1695 [Source:HGNC Symbol;Acc:HGNC:52483]	chr21	28116094	28228667	-1	q21.3	LINC01695	36.7	lncRNA	5319
ENSG00000236780	Favorable	-	long intergenic non-protein coding RNA 1829 [Source:HGNC Symbol;Acc:HGNC:52635]	chr2	67123357	67397980	-1	p14	LINC01829	37.52	lncRNA	4330
ENSG00000265692	Favorable	-	long intergenic non-protein coding RNA 1970 [Source:HGNC Symbol;Acc:HGNC:52796]	chr17	82290046	82292814	-1	q25.3	LINC01970	53.34	lncRNA	1810
ENSG00000238755	Favorable	-	long intergenic non-protein coding RNA 2006 [Source:HGNC Symbol;Acc:HGNC:52842]	chr3	153384934	153980186	-1	q25.2	LINC02006	36.85	lncRNA	2816
ENSG00000267452	Favorable	-	long intergenic non-protein coding RNA 2073 [Source:HGNC Symbol;Acc:HGNC:52919]	chr17	51336646	51521401	1	q21.33	LINC02073	43.36	lncRNA	7433
ENSG00000273172	Favorable	[216]	long intergenic non-protein coding RNA 2091 [Source:HGNC Symbol;Acc:HGNC:52942]	chr17	183824	191587	-1	p13.3	LINC02091	47.53	lncRNA	1185
ENSG00000261122	Favorable	[217]	long intergenic non-protein coding RNA 2167 [Source:HGNC Symbol;Acc:HGNC:53028]	chr16	35743268	35756515	1	p11.1	LINC02167	56.91	lncRNA	1989
ENSG00000258884	Favorable	-	long intergenic non-protein coding RNA 2321 [Source:HGNC Symbol;Acc:HGNC:53240]	chr14	90820064	90828199	-1	q32.11	LINC02321	48.45	lncRNA	2299
ENSG00000206187	Favorable	-	long intergenic non-protein coding RNA 2346 [Source:HGNC Symbol;Acc:HGNC:53268]	chr15	25902119	26053123	1	q12	LINC02346	43.11	lncRNA	8352
ENSG00000223470	Favorable	-	long intergenic non-protein coding RNA 2629 [Source:HGNC Symbol;Acc:HGNC:54108]	chr10	33909238	33917804	1	p11.22	LINC02629	39.06	lncRNA	631
ENSG00000232453	Favorable	-	long intergenic non-protein coding RNA 2777 [Source:HGNC Symbol;Acc:HGNC:54297]	chr1	58882868	58931897	-1	p32.1	LINC02777	43.93	lncRNA	2068
ENSG00000260083	Favorable	[13]	MIR762 host gene [Source:HGNC Symbol;Acc:HGNC:51386]	chr16	30875222	30895220	1	p11.2	MIR762HG	52.7	lncRNA	2162
ENSG00000264235	Favorable	-	MYL12A and MYL12B antisense RNA 1 [Source:HGNC Symbol;Acc:HGNC:55331]	chr18	3255436	3261850	-1	p11.31	MYL12-AS1	40.41	lncRNA	1063
ENSG00000265369	Favorable	-	prostate cancer associated transcript 18 [Source:HGNC Symbol;Acc:HGNC:49211]	chr18	26687621	26703638	-1	q11.2	PCAT18	40.57	lncRNA	2598
ENSG00000203362	Favorable	-	POLH antisense RNA 1 [Source:HGNC Symbol;Acc:HGNC:40459]	chr6	43588230	43591362	-1	p21.1	POLH-AS1	41.46	lncRNA	990
ENSG00000269386	Favorable	-	RAB11B antisense RNA 1 [Source:HGNC Symbol;Acc:HGNC:44178]	chr19	8374373	8390685	-1	p13.2	RAB11B-AS1	48.55	lncRNA	1156
ENSG00000246763	Favorable	-	RGMB antisense RNA 1 [Source:HGNC Symbol;Acc:HGNC:48666]	chr5	98769618	98773469	-1	q15	RGMB-AS1	47.38	lncRNA	2358
ENSG00000255794	Favorable	-	rhabdomyosarcoma 2 associated transcript [Source:HGNC Symbol;Acc:HGNC:29893]	chr12	97430884	97598415	1	q23.1	RMST	36.66	lncRNA	10231
ENSG00000247092	Favorable	[218]	small nucleolar RNA host gene 10 [Source:HGNC Symbol;Acc:HGNC:27510]	chr14	95521943	95534889	-1	q32.13	SNHG10	44.55	lncRNA	5437
ENSG00000249700	Favorable	-	SRD5A3 antisense RNA 1 [Source:HGNC Symbol;Acc:HGNC:44138]	chr4	55363971	55395847	-1	q12	SRD5A3-AS1	43.19	lncRNA	5148
ENSG00000264964	Favorable	-	TWSG1 divergent transcript [Source:HGNC Symbol;Acc:HGNC:55329]	chr18	9310522	9334445	-1	p11.22	TWSG1-DT	40.63	lncRNA	5142
ENSG00000256262	Favorable	[146]	USP30 antisense RNA 1 [Source:HGNC Symbol;Acc:HGNC:40909]	chr12	109052350	109053952	-1	q24.11	USP30-AS1	58.08	lncRNA	656
ENSG00000235021	Favorable	-	novel transcript	chr1	246690047	246691821	1	q44	ENSG00000235021	46.93	lncRNA	522
ENSG00000273221	Favorable	-	novel transcript, antisense to CEPT1	chr1	111184415	111185061	-1	p13.3	ENSG00000273221	32.92	lncRNA	647
ENSG00000232739	Favorable	-	novel transcript	chr10	15237492	15241767	1	p13	ENSG00000232739	41.79	lncRNA	794
ENSG00000270087	Favorable	-	novel transcript	chr10	75279726	75401246	-1	q22.2	ENSG00000270087	45.92	lncRNA	564
ENSG00000255135	Favorable	-	novel transcript	chr11	76435559	76444687	-1	q13.5	ENSG00000255135	43.4	lncRNA	1056
ENSG00000256101	Favorable	-	novel transcript	chr12	8321876	8329614	1	p13.31	ENSG00000256101	44.5	lncRNA	851
ENSG00000256948	Favorable	-	novel transcript	chr12	106524	111850	-1	p13.33	ENSG00000256948	46.52	lncRNA	586
ENSG00000257261	Favorable	-	novel transcript	chr12	46383652	46876784	1	q13.11	ENSG00000257261	38.47	lncRNA	4868
ENSG00000275769	Favorable	-	novel transcript, sense intronic to DENND5B	chr12	31443792	31444208	-1	p11.21	ENSG00000275769	34.05	lncRNA	417
ENSG00000276727	Favorable	-	novel transcript, antisense to SHMT2	chr12	57229498	57230198	-1	q13.3	ENSG00000276727	57.2	lncRNA	701
ENSG00000277863	Favorable	-	novel transcript	chr13	106903150	106904099	-1	q33.3	ENSG00000277863	37.16	lncRNA	950
ENSG00000258521	Favorable	-	novel transcript, antisense to WARS	chr14	100339832	100340554	1	q32.2	ENSG00000258521	52.42	lncRNA	552
ENSG00000259772	Favorable	-	novel transcript	chr15	31221999	31230838	-1	q13.3	ENSG00000259772	50.31	lncRNA	1563
ENSG00000263427	Favorable	-	novel transcript	chr17	8056225	8057621	-1	p13.1	ENSG00000263427	47.1	lncRNA	517
ENSG00000265840	Favorable	-	novel transcript, antisense to TRAF4	chr17	28749731	28750079	-1	q11.2	ENSG00000265840	52.72	lncRNA	287
ENSG00000274213	Favorable	-	novel transcript	chr17	56914186	56914533	1	q22	ENSG00000274213	63.51	lncRNA	348
ENSG00000277597	Favorable	-	novel transcript, antisense to PRPF8	chr17	1684726	1685151	1	p13.3	ENSG00000277597	62.91	lncRNA	426
ENSG00000266149	Favorable	-	novel transcript, antisense to PTPRM	chr18	8360820	8367034	-1	p11.23	ENSG00000266149	45.49	lncRNA	616
ENSG00000267627	Favorable	-	novel transcript	chr18	35951803	35966118	-1	q12.2	ENSG00000267627	39.38	lncRNA	731
ENSG00000273368	Favorable	-	novel transcript, sense intronic to PTPRM	chr18	8154558	8155070	1	p11.23	ENSG00000273368	29.63	lncRNA	513
ENSG00000268555	Favorable	-	novel transcript	chr19	21569738	21587322	-1	p12	ENSG00000268555	44.01	lncRNA	2262
ENSG00000268650	Favorable	-	novel transcript, antisense to PDE4C	chr19	18204730	18220480	1	p13.11	ENSG00000268650	53.5	lncRNA	1212
ENSG00000230432	Favorable	-	novel transcript	chr2	219299002	219304130	1	q35	ENSG00000230432	54.77	lncRNA	311
ENSG00000235319	Favorable	-	novel transcript	chr2	105324210	105330529	1	q12.2	ENSG00000235319	48.96	lncRNA	674
ENSG00000273063	Favorable	-	novel transcript	chr2	58241349	58241686	1	p16.1	ENSG00000273063	55.92	lncRNA	338
ENSG00000276517	Favorable	-	novel transcript, sense intronic to BIRC6	chr2	32526504	32529507	1	p22.3	ENSG00000276517	38.95	lncRNA	3004
ENSG00000281920	Favorable	-	novel transcript	chr2	65623272	65628424	1	p14	ENSG00000281920	39.08	lncRNA	744
ENSG00000272858	Favorable	-	novel transcript	chr22	28814914	28815662	1	q12.1	ENSG00000272858	45.53	lncRNA	749
ENSG00000250039	Favorable	-	novel transcript	chr4	21949015	22330330	1	p15.2	ENSG00000250039	38.11	lncRNA	4390
ENSG00000272626	Favorable	-	novel transcript	chr4	68901008	68906983	-1	q13.2	ENSG00000272626	47.37	lncRNA	477
ENSG00000272986	Favorable	-	novel transcript, antisense to RUFY3	chr4	70703747	70704491	-1	q13.3	ENSG00000272986	41.48	lncRNA	745
ENSG00000272203	Favorable	-	novel transcript	chr5	132817248	132818000	-1	q31.1	ENSG00000272203	37.85	lncRNA	753
ENSG00000272417	Favorable	-	novel transcript	chr5	10203600	10204040	-1	p15.2	ENSG00000272417	29.02	lncRNA	441
ENSG00000228506	Favorable	-	novel transcript	chr6	99424922	99432323	1	q16.2	ENSG00000228506	42.97	lncRNA	2588
ENSG00000272009	Favorable	-	novel transcript, antisense to ZNF165	chr6	28078792	28081130	-1	p22.1	ENSG00000272009	48.61	lncRNA	686
ENSG00000272243	Favorable	-	novel transcript	chr6	74530248	74734319	-1	q13	ENSG00000272243	36.55	lncRNA	1479
ENSG00000272379	Favorable	-	novel transcript	chr6	13290018	13290490	-1	p24.1	ENSG00000272379	37.63	lncRNA	473
ENSG00000214870	Favorable	-	novel transcript	chr7	26398593	26497595	1	p15.2	ENSG00000214870	42.16	lncRNA	7236
ENSG00000237773	Favorable	-	novel transcript	chr7	16970320	17299368	-1	p21.1	ENSG00000237773	36.59	lncRNA	10246
ENSG00000260997	Favorable	-	novel transcript, overlapping MYO1G	chr7	44958999	44960909	-1	p13	ENSG00000260997	50.29	lncRNA	1911
ENSG00000273391	Favorable	-	novel transcript, antisense to LUC7L2	chr7	139359032	139359566	-1	q34	ENSG00000273391	62.06	lncRNA	535
ENSG00000253369	Favorable	-	novel transcript	chr8	53394110	53484067	-1	q11.23	ENSG00000253369	39.97	lncRNA	3360
ENSG00000254812	Favorable	-	novel transcript	chr8	143632071	143633756	-1	q24.3	ENSG00000254812	54.21	lncRNA	701
ENSG00000255224	Favorable	-	TEC	chr8	144078002	144079265	-1	q24.3	ENSG00000255224	62.9	lncRNA	1264
ENSG00000260484	Favorable	-	novel transcript	chr8	53388701	53390872	-1	q11.23	ENSG00000260484	42.86	lncRNA	2172
ENSG00000253400	Favorable	-	novel transcript	chr9	26801733	26805862	1	p21.2	ENSG00000253400	37.94	lncRNA	371
ENSG00000232412	Favorable	-	novel transcript	chrX	123959233	123961341	-1	q25	ENSG00000232412	57.66	lncRNA	326
ENSG00000290574	Favorable	-	novel transcript	chr6	30005971	30009956	1		ENSG00000290574		lncRNA
ENSG00000290689	Favorable	-	novel transcript	chr15	84199311	84230136	-1		ENSG00000290689		lncRNA
ENSG00000290796	Favorable	-	novel transcript	chr22	25351418	25405377	-1		ENSG00000290796		lncRNA

## Sheet: DFS
Gene_ID	Prognosis	Previous references in EOC	Gene_description	Chromosome_scaffold_name	Gene_start_bp	Gene_end_bp	Strand	Karyotype_band	Gene_name	Gene_GC_content	Gene_type	Gene_Length
ENSG00000251562	Unfavorable	[22]	metastasis associated lung adenocarcinoma transcript 1 [Source:HGNC Symbol;Acc:HGNC:29665]	chr11	65497688	65506516	1	q13.1	MALAT1	40.56	lncRNA	8829
ENSG00000228315	Unfavorable	-	GUSB pseudogene 11 [Source:HGNC Symbol;Acc:HGNC:42325]	chr22	23638487	23717356	-1	q11.23	GUSBP11	50.35	lncRNA	7764
ENSG00000267374	Unfavorable	-	MIR924 host gene [Source:HGNC Symbol;Acc:HGNC:44332]	chr18	39206917	39800322	-1	q12.3	MIR924HG	37.1	lncRNA	11735
ENSG00000260372	Unfavorable	-	AQP4 antisense RNA 1 [Source:HGNC Symbol;Acc:HGNC:26399]	chr18	26655737	27190698	1	q11.2	AQP4-AS1	39.28	lncRNA	11044
ENSG00000264859	Unfavorable	-	DSG2 antisense RNA 1 [Source:HGNC Symbol;Acc:HGNC:51311]	chr18	31542146	31556948	-1	q12.1	DSG2-AS1	40.22	lncRNA	2448
ENSG00000214922	Unfavorable	[219]	HLA-F antisense RNA 1 [Source:HGNC Symbol;Acc:HGNC:26645]	chr6	29726601	29749049	-1	p22.1	HLA-F-AS1	45.94	lncRNA	4179
ENSG00000233429	Unfavorable	[220]	HOXA transcript antisense RNA, myeloid-specific 1 [Source:HGNC Symbol;Acc:HGNC:37117]	chr7	27095647	27100265	1	p15.2	HOTAIRM1	53.93	lncRNA	1496
ENSG00000229373	Unfavorable	[221]	long intergenic non-protein coding RNA 452 [Source:HGNC Symbol;Acc:HGNC:42800]	chr13	113888306	113923512	1	q34	LINC00452	45.6	lncRNA	3653
ENSG00000233237	Unfavorable	[222]	long intergenic non-protein coding RNA 472 [Source:HGNC Symbol;Acc:HGNC:21380]	chr6	71343427	71420745	-1	q13	LINC00472	37.13	lncRNA	19875
ENSG00000260910	Unfavorable	[223]	long intergenic non-protein coding RNA 565 [Source:HGNC Symbol;Acc:HGNC:43709]	chr13	113923052	113928991	-1	q34	LINC00565	52.49	lncRNA	5940
ENSG00000267272	Unfavorable	-	long intergenic non-protein coding RNA 1140 [Source:HGNC Symbol;Acc:HGNC:27922]	chr1	87129765	87169198	1	p22.3	LINC01140	45.03	lncRNA	6717
ENSG00000258733	Unfavorable	-	long intergenic non-protein coding RNA 2328 [Source:HGNC Symbol;Acc:HGNC:53248]	chr14	85911438	86161500	1	q31.3	LINC02328	36.14	lncRNA	5974
ENSG00000248810	Unfavorable	-	long intergenic non-protein coding RNA 2432 [Source:HGNC Symbol;Acc:HGNC:53363]	chr4	141302910	141357096	-1	q31.21	LINC02432	38.71	lncRNA	7305
ENSG00000231721	Unfavorable	[224]	long intergenic non-protein coding RNA, p53 induced transcript [Source:HGNC Symbol;Acc:HGNC:26885]	chr7	130938963	131110176	-1	q32.3	LINC-PINT	41.59	lncRNA	9030
ENSG00000253741	Unfavorable	[170]	lncRNA associated with ovarian cancer 1 [Source:HGNC Symbol;Acc:HGNC:53947]	chr8	142701857	142727016	-1	q24.3	LNCOC1	44.5	lncRNA	6391
ENSG00000235740	Unfavorable	-	PHACTR2 antisense RNA 1 [Source:HGNC Symbol;Acc:HGNC:40943]	chr6	143554325	143562031	-1	q24.2	PHACTR2-AS1	42.61	lncRNA	2115
ENSG00000291035	Unfavorable	-	Ribosomal RNA processing 7 homolog B, pseudogene	chr22	42555212	42582039	-1		RRP7BP		lncRNA
ENSG00000247828	Unfavorable	-	TMEM161B antisense RNA 1 [Source:HGNC Symbol;Acc:HGNC:43839]	chr5	88268891	88439337	1	q14.3	TMEM161B-AS1	37.29	lncRNA	35171
ENSG00000237232	Unfavorable	[225]	ZNF295 antisense RNA 1 [Source:HGNC Symbol;Acc:HGNC:23130]	chr21	42009194	42055130	1	q22.3	ZNF295-AS1	50.2	lncRNA	7224
ENSG00000237149	Unfavorable	[34]	ZNF503 antisense RNA 2 [Source:HGNC Symbol;Acc:HGNC:23525]	chr10	75401519	75408982	1	q22.2	ZNF503-AS2	59.66	lncRNA	3348
ENSG00000233834	Unfavorable	-	novel transcript	chr7	20217577	20221700	1	p21.1	ENSG00000233834	40.74	lncRNA	901
ENSG00000243004	Unfavorable	-	novel transcript, sense overlapping to MACC1	chr7	19918981	20140453	-1	p21.1	ENSG00000243004	36.82	lncRNA	3109
ENSG00000248268	Unfavorable	-	novel transcript	chr5	111277517	111302567	-1	q22.1	ENSG00000248268	36.84	lncRNA	565
ENSG00000249476	Unfavorable	-	novel transcript	chr5	109237120	109326369	-1	q21.3	ENSG00000249476	42.43	lncRNA	5862
ENSG00000258603	Unfavorable	-	novel transcript, antisense to ACOT6	chr14	73555115	73633941	-1	q24.3	ENSG00000258603	46.99	lncRNA	3777
ENSG00000259065	Unfavorable	-	novel transcript, antisense to C14orf43	chr14	73787355	73803300	1	q24.3	ENSG00000259065	46.14	lncRNA	2178
ENSG00000260412	Unfavorable	-	novel transcript, overlapping LINGO2	chr9	27937617	27944497	-1	p21.2	ENSG00000260412	36.97	lncRNA	6881
ENSG00000261292	Unfavorable	-	novel transcript	chr3	97759523	97761532	1	q11.2	ENSG00000261292	31.04	lncRNA	2010
ENSG00000265975	Unfavorable	-	novel transcript	chr17	8967523	8976995	1	p13.1	ENSG00000265975	41.21	lncRNA	557
ENSG00000266283	Unfavorable	-	novel transcript, antisense to GATA6	chr18	22200619	22205229	-1	q11.2	ENSG00000266283	42.77	lncRNA	770
ENSG00000270074	Unfavorable	-	novel transcript	chr8	12412827	12414373	1	p23.1	ENSG00000270074	48.87	lncRNA	1547
ENSG00000272632	Unfavorable	-	novel transcript	chr4	141430831	141431284	1	q31.21	ENSG00000272632	35.46	lncRNA	454
ENSG00000278668	Unfavorable	-	novel transcript	chr17	32410159	32410746	1	q11.2	ENSG00000278668	37.76	lncRNA	588
ENSG00000280604	Unfavorable	-	PCBP3 overlapping transcript 1	chr21	45914296	45919483	1	q22.3	ENSG00000280604	54.93	lncRNA	4807
ENSG00000267128	Favorable	[33]	RNF157 antisense RNA 1 [Source:HGNC Symbol;Acc:HGNC:44127]	chr17	76138432	76154650	1	q25.1	RNF157-AS1	54.16	lncRNA	4398
ENSG00000234753	Favorable	[164]	FOXP4 antisense RNA 1 [Source:HGNC Symbol;Acc:HGNC:50332]	chr6	41494853	41548621	-1	p21.1	FOXP4-AS1	51.42	lncRNA	934
ENSG00000257588	Favorable	-	novel transcript, antisense to AQP5	chr12	49951512	49962924	-1	q13.12	ENSG00000257588	56.57	lncRNA	1574
ENSG00000246523	Favorable	-	FZD4 divergent transcript [Source:HGNC Symbol;Acc:HGNC:54219]	chr11	86955616	87021909	1	q14.2	FZD4-DT	41.87	lncRNA	1988
ENSG00000261071	Favorable	[169]	novel transcript, antisense to NOL7	chr6	13614111	13615155	-1	p23	ENSG00000261071	54.16	lncRNA	1045
ENSG00000246877	Favorable	-	dynamin 1 pseudogene 35 [Source:HGNC Symbol;Acc:HGNC:35182]	chr15	75727670	75738623	-1	q24.2	DNM1P35	56.34	lncRNA	3188
ENSG00000231527	Favorable	-	family with sequence similarity 27 member C [Source:HGNC Symbol;Acc:HGNC:23668]	chr9	61854148	62096920	1	q13	FAM27C	44.33	lncRNA	15135
ENSG00000255733	Favorable	[164]	IFNG antisense RNA 1 [Source:HGNC Symbol;Acc:HGNC:43910]	chr12	67989445	68234686	1	q15	IFNG-AS1	38.65	lncRNA	4538
ENSG00000271888	Favorable	-	JARID2 divergent transcript [Source:HGNC Symbol;Acc:HGNC:55240]	chr6	15243923	15245000	-1	p22.3	JARID2-DT	53.43	lncRNA	1078
ENSG00000258279	Favorable	[209]	long intergenic non-protein coding RNA 592 [Source:HGNC Symbol;Acc:HGNC:27474]	chr12	52164115	52223813	1	q13.13	LINC00592	53.66	lncRNA	2255
ENSG00000278090	Favorable	-	leukemia-associated non-coding IGF1R activator RNA 1 [Source:HGNC Symbol;Acc:HGNC:51199]	chr15	99014526	99031054	1	q26.3	LUNAR1	48.51	lncRNA	3243
ENSG00000241657	Favorable	[210]	T cell receptor beta variable 11-2 [Source:HGNC Symbol;Acc:HGNC:12181]	chr7	142433895	142434394	1	q34	TRBV11-2	49.2	lncRNA	408
ENSG00000228863	Favorable	-	novel transcript, antisense to CD48	chr1	160670778	160699761	1	q23.3	ENSG00000228863	43.12	lncRNA	4121
ENSG00000259834	Favorable	[211]	novel transcript	chr1	110653560	110657040	-1	p13.3	ENSG00000259834	31.03	lncRNA	3481
ENSG00000278022	Favorable	-	novel transcript, sense intronic to IGF1R	chr15	98660210	98660668	1	q26.3	ENSG00000278022	45.1	lncRNA	459
ENSG00000276408	Favorable	-	novel transcript	chr16	75556392	75557059	1	q23.1	ENSG00000276408	43.26	lncRNA	668
ENSG00000263063	Favorable	-	novel transcript	chr17	82713908	82716255	-1	q25.3	ENSG00000263063	49.57	lncRNA	898
ENSG00000277901	Favorable	-	novel transcript	chr20	23320958	23325352	-1	p11.21	ENSG00000277901	45.71	lncRNA	431
ENSG00000273210	Favorable	-	novel transcript, antisense to DYRK1A	chr21	37365477	37365932	-1	q22.13	ENSG00000273210	47.15	lncRNA	456
ENSG00000272209	Favorable	-	novel transcript	chr6	13825432	13826574	1	p23	ENSG00000272209	32.28	lncRNA	1143
ENSG00000231794	Favorable	-	novel transcript, antisense to WDR91	chr7	135198401	135209837	1	q33	ENSG00000231794	43.76	lncRNA	2503
ENSG00000290554	Favorable	[226]	ADCY10 pseudogene 1	chr6	41101034	41140835	1		ADCY10P1		lncRNA
ENSG00000254902	Favorable	-	ANO1 antisense RNA 1 [Source:HGNC Symbol;Acc:HGNC:40016]	chr11	70187788	70188509	-1	q13.3	ANO1-AS1	53.19	lncRNA	646
ENSG00000258099	Favorable	-	ATXN2 antisense RNA [Source:HGNC Symbol;Acc:HGNC:51838]	chr12	111599498	111600256	1	q24.12	ATXN2-AS	61.79	lncRNA	485
ENSG00000233554	Favorable	-	B4GALT1 antisense RNA 1 [Source:HGNC Symbol;Acc:HGNC:49910]	chr9	33166948	33182865	1	p21.1	B4GALT1-AS1	45.67	lncRNA	3835
ENSG00000271387	Favorable	-	C1orf21 divergent transcript [Source:HGNC Symbol;Acc:HGNC:55249]	chr1	184385753	184386704	-1	q25.3	C1orf21-DT	56.72	lncRNA	952
ENSG00000181577	Favorable	[227]	chromosome 6 open reading frame 223 [Source:HGNC Symbol;Acc:HGNC:28692]	chr6	44000580	44007612	1	p21.1	C6orf223	57.78	lncRNA	5571
ENSG00000259736	Favorable	-	CRTC3 antisense RNA 1 [Source:HGNC Symbol;Acc:HGNC:51433]	chr15	90620007	90717141	-1	q26.1	CRTC3-AS1	46.76	lncRNA	957
ENSG00000225362	Favorable	-	cancer/testis associated 62 [Source:HGNC Symbol;Acc:HGNC:27286]	chr15	71110244	71115494	-1	q23	CT62	46.54	lncRNA	2849
ENSG00000250635	Favorable	-	CXXC5 antisense RNA 1 [Source:HGNC Symbol;Acc:HGNC:53009]	chr5	139648999	139649728	-1	q31.2	CXXC5-AS1	68.22	lncRNA	577
ENSG00000236256	Favorable	-	DIAPH2 antisense RNA 1 [Source:HGNC Symbol;Acc:HGNC:16972]	chrX	97431286	97642589	-1	q21.33	DIAPH2-AS1	38.04	lncRNA	2309
ENSG00000177337	Favorable	-	DLGAP1 antisense RNA 1 [Source:HGNC Symbol;Acc:HGNC:31676]	chr18	3593732	3598363	1	p11.31	DLGAP1-AS1	48.21	lncRNA	2116
ENSG00000280739	Favorable	-	EIF1B antisense RNA 1 [Source:HGNC Symbol;Acc:HGNC:44555]	chr3	40061110	40309698	-1	p22.1	EIF1B-AS1	41.48	lncRNA	19361
ENSG00000267757	Favorable	-	EML2 antisense RNA 1 [Source:HGNC Symbol;Acc:HGNC:48331]	chr19	45641494	45642840	1	q13.32	EML2-AS1	61.4	lncRNA	1235
ENSG00000245571	Favorable	-	FAM111A divergent transcript [Source:HGNC Symbol;Acc:HGNC:53752]	chr11	59130133	59143015	-1	q12.1	FAM111A-DT	42.04	lncRNA	3214
ENSG00000227214	Favorable	[228]	HLA complex group 15 [Source:HGNC Symbol;Acc:HGNC:18361]	chr6	28986203	28987484	1	p22.1	HCG15	49.3	lncRNA	1032
ENSG00000270816	Favorable	[206]	long intergenic non-protein coding RNA 221 [Source:HGNC Symbol;Acc:HGNC:20169]	chr14	106482435	106521073	1	q32.33	LINC00221	41.66	lncRNA	4629
ENSG00000214894	Favorable	[229]	long intergenic non-protein coding RNA 243 [Source:HGNC Symbol;Acc:HGNC:30956]	chr6	30798654	30830659	-1	p21.33	LINC00243	47.09	lncRNA	2171
ENSG00000229228	Favorable	-	long intergenic non-protein coding RNA 582 [Source:HGNC Symbol;Acc:HGNC:43842]	chr1	231591292	231612090	-1	q42.2	LINC00582	41.87	lncRNA	597
ENSG00000259361	Favorable	-	long intergenic non-protein coding RNA 927 [Source:HGNC Symbol;Acc:HGNC:27522]	chr15	80263068	80341805	-1	q25.1	LINC00927	43.18	lncRNA	5425
ENSG00000261455	Favorable	-	long intergenic non-protein coding RNA 1003 [Source:HGNC Symbol;Acc:HGNC:48957]	chr7	152463786	152465549	1	q36.1	LINC01003	60.83	lncRNA	1764
ENSG00000281912	Favorable	-	long intergenic non-protein coding RNA 1144 [Source:HGNC Symbol;Acc:HGNC:49460]	chr1	45303910	45305619	1	p34.1	LINC01144	56.9	lncRNA	1710
ENSG00000223466	Favorable	-	long intergenic non-protein coding RNA 1825 [Source:HGNC Symbol;Acc:HGNC:52631]	chr2	195532945	195540287	1	q32.3	LINC01825	39.92	lncRNA	3362
ENSG00000257556	Favorable	-	long intergenic non-protein coding RNA 2298 [Source:HGNC Symbol;Acc:HGNC:53216]	chr14	105093609	105100131	1	q32.33	LINC02298	55.27	lncRNA	3584
ENSG00000205056	Favorable	-	long intergenic non-protein coding RNA 2397 [Source:HGNC Symbol;Acc:HGNC:53323]	chr12	92466451	92492091	1	q22	LINC02397	38.82	lncRNA	10626
ENSG00000230943	Favorable	-	long intergenic non-protein coding RNA 2541 [Source:HGNC Symbol;Acc:HGNC:53574]	chr6	113616927	113650090	-1	q21	LINC02541	39.61	lncRNA	2409
ENSG00000223714	Favorable	-	long intergenic non-protein coding RNA 2601 [Source:HGNC Symbol;Acc:HGNC:53966]	chrX	41275739	41276778	1	p11.4	LINC02601	62.98	lncRNA	835
ENSG00000187013	Favorable	-	long intergenic non-protein coding RNA 2875 [Source:HGNC Symbol;Acc:HGNC:32699]	chr17	61411751	61413280	1	q23.2	LINC02875	70.85	lncRNA	1530
ENSG00000220891	Favorable	-	uncharacterized LOC648691 [Source:NCBI gene (formerly Entrezgene);Acc:648691]	chr22	22559343	22566602	1	q11.22	LL22NC03-63E9.3	46.45	lncRNA	3111
ENSG00000271849	Favorable	-	MAN2A1 divergent transcript [Source:HGNC Symbol;Acc:HGNC:54821]	chr5	109687802	109688329	-1	q21.3	MAN2A1-DT	38.45	lncRNA	528
ENSG00000225783	Favorable	[230]	myocardial infarction associated transcript [Source:HGNC Symbol;Acc:HGNC:33425]	chr22	26646411	26676475	1	q12.1	MIAT	50	lncRNA	13908
ENSG00000253522	Favorable	-	MIR3142 host gene [Source:HGNC Symbol;Acc:HGNC:51944]	chr5	160438594	160487426	1	q33.3	MIR3142HG	42.44	lncRNA	2377
ENSG00000226953	Favorable	-	NCKAP5 antisense RNA 2 [Source:HGNC Symbol;Acc:HGNC:54065]	chr2	133264968	133285445	1	q21.2	NCKAP5-AS2	38.38	lncRNA	1757
ENSG00000266053	Favorable	-	NDUFV2 antisense RNA 1 [Source:HGNC Symbol;Acc:HGNC:50826]	chr18	9121265	9136645	-1	p11.22	NDUFV2-AS1	37.98	lncRNA	1432
ENSG00000236859	Favorable	-	NIFK antisense RNA 1 [Source:HGNC Symbol;Acc:HGNC:27385]	chr2	121649320	121728563	1	q14.3	NIFK-AS1	44.13	lncRNA	5112
ENSG00000247809	Favorable	-	NR2F2 antisense RNA 1 [Source:HGNC Symbol;Acc:HGNC:44222]	chr15	96110040	96327361	-1	q26.2	NR2F2-AS1	40.51	lncRNA	10503
ENSG00000245888	Favorable	-	NSMCE1 divergent transcript [Source:HGNC Symbol;Acc:HGNC:51368]	chr16	27268205	27290492	1	p12.1	NSMCE1-DT	44.09	lncRNA	3780
ENSG00000235823	Favorable	[231]	oligodendrocyte maturation-associated long intergenic non-coding RNA [Source:HGNC Symbol;Acc:HGNC:28060]	chr10	100373099	100454043	1	q24.31	OLMALINC	43.44	lncRNA	13609
ENSG00000204380	Favorable	[232]	PKP4 antisense RNA 1 [Source:HGNC Symbol;Acc:HGNC:52580]	chr2	158658337	158735002	-1	q24.1	PKP4-AS1	44.15	lncRNA	5874
ENSG00000261441	Favorable	-	POLG divergent transcript [Source:HGNC Symbol;Acc:HGNC:55363]	chr15	89335053	89336161	1	q26.1	POLG-DT	53.02	lncRNA	1109
ENSG00000279261	Favorable	-	uncharacterized LOC100130249 [Source:NCBI gene (formerly Entrezgene);Acc:100130249]	chr1	234757619	234760056	-1	q42.3	PP2672	50.82	lncRNA	2438
ENSG00000272663	Favorable	-	PPP1R21 divergent transcript [Source:HGNC Symbol;Acc:HGNC:55206]	chr2	48440043	48440597	-1	p16.3	PPP1R21-DT	47.03	lncRNA	555
ENSG00000225361	Favorable	[142]	PPP1R26 antisense RNA 1 [Source:HGNC Symbol;Acc:HGNC:48717]	chr9	135462727	135480777	-1	q34.3	PPP1R26-AS1	53.34	lncRNA	4184
ENSG00000245534	Favorable	-	RORA antisense RNA 1 [Source:HGNC Symbol;Acc:HGNC:51410]	chr15	60479152	60630637	1	q22.2	RORA-AS1	40.19	lncRNA	2143
ENSG00000262061	Favorable	-	RPH3AL antisense RNA 1 [Source:HGNC Symbol;Acc:HGNC:55345]	chr17	331205	333488	1	p13.3	RPH3AL-AS1	56.26	lncRNA	2284
ENSG00000246273	Favorable	[233]	SBF2 antisense RNA 1 [Source:HGNC Symbol;Acc:HGNC:27438]	chr11	9758268	9811335	1	p15.4	SBF2-AS1	44.1	lncRNA	5177
ENSG00000224281	Favorable	-	SLC25A5 antisense RNA 1 [Source:HGNC Symbol;Acc:HGNC:43438]	chrX	119465986	119469128	-1	q24	SLC25A5-AS1	49.28	lncRNA	3143
ENSG00000203446	Favorable	-	SUGCT antisense RNA 1 [Source:HGNC Symbol;Acc:HGNC:40745]	chr7	40538127	40546928	-1	p14.1	SUGCT-AS1	37.99	lncRNA	1771
ENSG00000229893	Favorable	-	TAX1BP1 antisense RNA 1 [Source:HGNC Symbol;Acc:HGNC:40576]	chr7	27733064	27740395	-1	p15.2	TAX1BP1-AS1	40.63	lncRNA	1190
ENSG00000240549	Favorable	-	THOC7 antisense RNA 1 [Source:HGNC Symbol;Acc:HGNC:41249]	chr3	63860645	63861819	1	p14.1	THOC7-AS1	40.26	lncRNA	673
ENSG00000237331	Favorable	-	XIAP antisense RNA 1 [Source:HGNC Symbol;Acc:HGNC:40078]	chrX	123872626	123873932	-1	q25	XIAP-AS1	50.96	lncRNA	482
ENSG00000267549	Favorable	-	ZSCAN5A antisense RNA 1 [Source:HGNC Symbol;Acc:HGNC:55294]	chr19	56314703	56365316	1	q13.43	ZSCAN5A-AS1	41.28	lncRNA	4770
ENSG00000224152	Favorable	-	novel transcript, antisense to BAZ2B	chr2	159615296	159617082	1	q24.2	ENSG00000224152	51.32	lncRNA	1494
ENSG00000226334	Favorable	-	novel transcript	chr9	104927553	104928892	1	q31.1	ENSG00000226334	60.37	lncRNA	469
ENSG00000226889	Favorable	-	novel transcript	chr1	161765325	161766227	-1	q23.3	ENSG00000226889	35.33	lncRNA	575
ENSG00000228021	Favorable	-	novel transcript	chr10	125683229	125709677	1	q26.13	ENSG00000228021	44.19	lncRNA	4558
ENSG00000228084	Favorable	-	novel transcript	chr1	99968383	99969864	-1	p21.2	ENSG00000228084	43.18	lncRNA	655
ENSG00000229311	Favorable	-	novel transcript	chr9	42579414	42586534	-1	p11.1	ENSG00000229311	34.98	lncRNA	3614
ENSG00000230912	Favorable	-	novel transcript	chr22	38666508	38668750	-1	q13.1	ENSG00000230912	48.6	lncRNA	410
ENSG00000231081	Favorable	-	novel transcript	chr20	26008791	26010531	-1	p11.1	ENSG00000231081	48.77	lncRNA	542
ENSG00000231098	Favorable	-	novel transcript	chr7	134284500	134286055	1	q33	ENSG00000231098	43.06	lncRNA	414
ENSG00000231519	Favorable	-	novel transcript	chr7	30069658	30075115	-1	p14.3	ENSG00000231519	38.88	lncRNA	518
ENSG00000232533	Favorable	-	novel transcript	chr7	143379692	143380495	-1	q34	ENSG00000232533	51.99	lncRNA	648
ENSG00000233230	Favorable	-	novel transcript	chr2	47905678	47907810	1	p16.3	ENSG00000233230	56.26	lncRNA	856
ENSG00000233242	Favorable	-	novel transcript	chr9	37112548	37120446	-1	p13.2	ENSG00000233242	44.5	lncRNA	2161
ENSG00000234134	Favorable	-	novel transcript	chr10	125718771	125719365	-1	q26.2	ENSG00000234134	57.31	lncRNA	300
ENSG00000235586	Favorable	-	novel transcript	chr2	38601598	38602178	1	p22.1	ENSG00000235586	49.05	lncRNA	233
ENSG00000236140	Favorable	-	novel transcript	chr1	145286610	145287755	-1	q21.1	ENSG00000236140	57.59	lncRNA	381
ENSG00000254290	Favorable	-	novel transcript	chr8	37597480	37599858	-1	p11.23	ENSG00000254290	51.58	lncRNA	2379
ENSG00000254343	Favorable	-	novel transcript	chr8	120052180	120056201	1	q24.12	ENSG00000254343	41.42	lncRNA	752
ENSG00000255440	Favorable	-	novel transcript	chr11	74398825	74416379	1	q13.4	ENSG00000255440	37.24	lncRNA	935
ENSG00000257042	Favorable	-	novel transcript, antisense to PTHLH	chr12	27958517	27969813	1	p11.22	ENSG00000257042	38.03	lncRNA	792
ENSG00000257327	Favorable	-	novel transcript	chr12	103841451	103844664	1	q23.3	ENSG00000257327	43.34	lncRNA	674
ENSG00000258534	Favorable	-	novel transcript	chr14	103854366	103880111	-1	q32.33	ENSG00000258534	53.34	lncRNA	582
ENSG00000258572	Favorable	[234]	novel transcript	chr14	95516136	95517911	1	q32.13	ENSG00000258572	64.53	lncRNA	993
ENSG00000258904	Favorable	-	novel transcript, intronic to YY1	chr14	100263781	100265405	1	q32.2	ENSG00000258904	50.52	lncRNA	533
ENSG00000259802	Favorable	-	novel transcript, antisense to MARCH6	chr5	10352701	10353601	-1	p15.2	ENSG00000259802	54.16	lncRNA	901
ENSG00000260038	Favorable	-	novel transcript, sense to intronic to ARL2BP	chr16	57247350	57248492	1	q13	ENSG00000260038	40.86	lncRNA	358
ENSG00000260352	Favorable	-	novel transcript, antisense to SMG1	chr16	18926863	18937043	1	p12.3	ENSG00000260352	46.53	lncRNA	463
ENSG00000260369	Favorable	-	novel transcript	chr17	80453735	80454729	-1	q25.3	ENSG00000260369	61.81	lncRNA	995
ENSG00000261204	Favorable	-	novel transcript	chr19	637105	637537	-1	p13.3	ENSG00000261204	52.42	lncRNA	433
ENSG00000261320	Favorable	-	novel transcript	chr16	67430667	67431464	-1	q22.1	ENSG00000261320	74.94	lncRNA	475
ENSG00000261655	Favorable	-	novel transcript, overlapping to GPR20	chr8	141353403	141355365	-1	q24.3	ENSG00000261655	60.42	lncRNA	1963
ENSG00000262115	Favorable	-	novel transcript, antisense to AZI1	chr17	81197393	81200288	1	q25.3	ENSG00000262115	64.54	lncRNA	805
ENSG00000266830	Favorable	-	novel transcript	chr17	28246454	28248006	-1	q11.2	ENSG00000266830	59.24	lncRNA	1553
ENSG00000267255	Favorable	-	novel transcript, antisense to CHAF1A	chr19	4429689	4430934	-1	p13.3	ENSG00000267255	54.82	lncRNA	569
ENSG00000267666	Favorable	-	novel transcript	chr19	663482	669500	1	p13.3	ENSG00000267666	54.96	lncRNA	3319
ENSG00000269951	Favorable	-	novel transcript, sense intronic to TSPAN3	chr15	77067654	77068325	-1	q24.3	ENSG00000269951	37.65	lncRNA	672
ENSG00000270115	Favorable	-	novel transcript	chr1	33261212	33261680	1	p35.1	ENSG00000270115	48.19	lncRNA	469
ENSG00000270265	Favorable	-	novel transcript	chr4	151333775	151353224	-1	q31.3	ENSG00000270265	42.58	lncRNA	540
ENSG00000271367	Favorable	-	novel transcript	chr6	53350158	53350705	1	p12.1	ENSG00000271367	38.32	lncRNA	548
ENSG00000272172	Favorable	-	novel transcript, antisense to ZNF696	chr8	143290399	143290621	-1	q24.3	ENSG00000272172	66.37	lncRNA	223
ENSG00000272456	Favorable	-	novel transcript	chr8	134722947	134723949	1	q24.22	ENSG00000272456	52.74	lncRNA	1003
ENSG00000272672	Favorable	-	novel transcript	chr1	89939601	89940147	1	p22.2	ENSG00000272672	44.06	lncRNA	547
ENSG00000272831	Favorable	-	novel transcript, antisense to RABGEF1	chr7	66739829	66740385	-1	q11.21	ENSG00000272831	49.55	lncRNA	557
ENSG00000273004	Favorable	-	novel transcript	chr1	185317779	185318530	1	q25.3	ENSG00000273004	46.54	lncRNA	752
ENSG00000273104	Favorable	-	novel transcript	chr21	34412200	34412587	1	q22.12	ENSG00000273104	36.86	lncRNA	388
ENSG00000273162	Favorable	-	novel transcript	chr10	101060029	101061005	-1	q24.31	ENSG00000273162	51.28	lncRNA	977
ENSG00000273456	Favorable	-	novel transcript	chr2	202374932	202375604	-1	q33.1	ENSG00000273456	51.56	lncRNA	673
ENSG00000273989	Favorable	-	novel transcript, sense intronic to CCDC91	chr12	28236227	28236828	1	p11.22	ENSG00000273989	25.75	lncRNA	602
ENSG00000275155	Favorable	-	novel transcript, sense intronic to ZNF423	chr16	49847018	49847632	-1	q12.1	ENSG00000275155	49.11	lncRNA	615
ENSG00000275202	Favorable	-	novel transcript, antisense to FNDC3A	chr13	48974967	48976867	-1	q14.2	ENSG00000275202	61.76	lncRNA	1101
ENSG00000275297	Favorable	-	novel transcript	chr9	41760088	41764175	1	p11.2	ENSG00000275297	47.95	lncRNA	1855
ENSG00000275484	Favorable	-	novel transcript	chr11	67374416	67374932	1	q13.2	ENSG00000275484	57.45	lncRNA	517
ENSG00000291006	Favorable	-	Novel transcript	chr6	52664366	52669155	1		ENSG00000291006		lncRNA
ENSG00000291136	Favorable	-	Novel transcript	chr7	66526088	66592397	-1		ENSG00000291136		lncRNA
