# Supplementary material for: Identification of lncRNAs Deregulated in Epithelial Ovarian Cancer Based on a Gene Expression Profiling Meta-Analysis
Source: Int J Mol Sci. 2023 Jun 28;24(13):10798. doi: 10.3390/ijms241310798 (PMC10341812; doi:10.3390/ijms241310798)
Supplement: Supplementary file 1 [file ijms-24-10798-s001.zip › Supplementary Table S7.xlsx]

## Sheet: STS7 Title
	Supplementary Table S7.- List of studies used in the “Metastasis” meta analysis with study information and results from the individual analyses.

## Sheet: STS7 Study information
Series	Country	Year	Platform	Sample source	Subtype	Primary tumor	Ascites/Effusion tumor cells	Peritoneal solid metastasis	Matched	Reference
GSE30587	USA	2011	Affymetrix Human Gene 1.0 ST Array	Tissue	-	9	0	9	Yes	[235]
GSE73064	China	2015	Affymetrix Human Genome U133 Plus 2.0 Array	Tissue	High grade serous	5	5	5	Yes	[236]
GSE73091	China	2015	Affymetrix Human Genome U133 Plus 2.0 Array	Tissue	Low grade serous	3	3	3	Yes	[236]
GSE133296	USA	2019	Illumina HiSeq X Ten	Tissue	-	10	0	20 (10+10)	Yes	[237]
GSE137237	USA	2019	Illumina NextSeq 500	Tissue	-	11	0	11	Yes	[131]
GSE115573	Israel	2018	Illumina Genome Analyzer IIx	Tissue	High grade serous	3	3	3	Yes	-
GSE98281	Finland	2017	Illumina HiSeq 2000	Tissue	High grade serous	10	0	10	Yes	[238]

## Sheet: GSE30587
Parametric p-value	FDR	Omental metastases	Primary tumour	Fold-change	ProbeSet	Gene_name	Gene_ID	Gene_description	Chromosome_scaffold_name	Gene_start_bp	Gene_end_bp	Strand	Karyotype_band	Gene_GC_content	Gene_type	Gene_Length
0.0052379	0.165	205.54	324.08	0.63	7900051	AGO3	ENSG00000126070	argonaute RISC catalytic component 3 [Source:HGNC Symbol;Acc:HGNC:18421]	chr1	35930718	36072500	1	p34.3	38.75	protein_coding	21153
0.0084342	0.178	268.71	349.6	0.77	7925622	AHCTF1	ENSG00000153207	AT-hook containing transcription factor 1 [Source:HGNC Symbol;Acc:HGNC:24618]	chr1	246839098	246931948	-1	q44	38.74	protein_coding	9579
0.0062674	0.165	125.16	171.5	0.73	7921970	ALDH9A1	ENSG00000143149	aldehyde dehydrogenase 9 family member A1 [Source:HGNC Symbol;Acc:HGNC:412]	chr1	165662216	165698863	-1	q24.1	40.34	protein_coding	3308
0.0052737	0.165	156.47	120.31	1.3	7900931	B4GALT2	ENSG00000117411	beta-1,4-galactosyltransferase 2 [Source:HGNC Symbol;Acc:HGNC:925]	chr1	43978943	43991170	1	p34.1	56.94	protein_coding	5472
0.0051474	0.165	138.81	188.89	0.73	7907171	BLZF1	ENSG00000117475	basic leucine zipper nuclear factor 1 [Source:HGNC Symbol;Acc:HGNC:1065]	chr1	169367970	169396540	1	q24.2	35.78	protein_coding	3820
0.0075355	0.171	75.95	44.75	1.7	7898793	C1QA	ENSG00000173372	complement C1q A chain [Source:HGNC Symbol;Acc:HGNC:1241]	chr1	22636628	22639678	1	p36.12	56.54	protein_coding	1220
0.0045557	0.16	289.53	185.95	1.56	7898799	C1QC	ENSG00000159189	complement C1q C chain [Source:HGNC Symbol;Acc:HGNC:1245]	chr1	22643633	22648110	1	p36.12	54.67	protein_coding	1332
0.0071665	0.171	39.08	63.26	0.62	7922152	CCDC181	ENSG00000117477	coiled-coil domain containing 181 [Source:HGNC Symbol;Acc:HGNC:28051]	chr1	169394870	169460669	-1	q24.2	36.8	protein_coding	3961
0.0051846	0.165	468.18	241.15	1.94	7902687	CCN1	ENSG00000142871	cellular communication network factor 1 [Source:HGNC Symbol;Acc:HGNC:2654]	chr1	85580761	85584589	1	p22.3	48.34	protein_coding	3698
0.009798	0.183	75.42	49.93	1.51	7904287	CD2	ENSG00000116824	CD2 molecule [Source:HGNC Symbol;Acc:HGNC:1639]	chr1	116754430	116769229	1	p13.1	47.11	protein_coding	1635
0.0007859	0.099	25.77	12.3	2.09	7908488	CFHR1	ENSG00000244414	complement factor H related 1 [Source:HGNC Symbol;Acc:HGNC:4888]	chr1	196819731	196832189	1	q31.3	33.73	protein_coding	2223
0.0030442	0.144	54.95	74.92	0.73	7910446	COG2	ENSG00000135775	component of oligomeric golgi complex 2 [Source:HGNC Symbol;Acc:HGNC:6546]	chr1	230642481	230693982	1	q42.2	39.42	protein_coding	10946
9.3e-06	0.0243	216.03	65.13	3.32	7918064	COL11A1	ENSG00000060718	collagen type XI alpha 1 chain [Source:HGNC Symbol;Acc:HGNC:2186]	chr1	102876467	103108872	-1	p21.1	33.18	protein_coding	9091
0.0034304	0.146	124.4	93.19	1.33	7914361	COL16A1	ENSG00000084636	collagen type XVI alpha 1 chain [Source:HGNC Symbol;Acc:HGNC:2193]	chr1	31652263	31704319	-1	p35.2	56	protein_coding	9253
0.0004068	0.0857	363.08	131.02	2.77	7919815	CTSK	ENSG00000143387	cathepsin K [Source:HGNC Symbol;Acc:HGNC:2536]	chr1	150794880	150809577	-1	q21.3	42.99	protein_coding	8447
0.0073401	0.171	64.58	104.52	0.62	7910030	DNAH14	ENSG00000185842	dynein axonemal heavy chain 14 [Source:HGNC Symbol;Acc:HGNC:2945]	chr1	224896262	225399292	1	q42.12	37.4	protein_coding	19693
0.0029554	0.144	139.08	99.19	1.4	7905220	ECM1	ENSG00000143369	extracellular matrix protein 1 [Source:HGNC Symbol;Acc:HGNC:3153]	chr1	150508062	150513789	1	q21.2	55.19	protein_coding	3360
0.001493	0.125	91.07	63.15	1.44	7919133	FCGR1A	ENSG00000150337	Fc fragment of IgG receptor Ia [Source:HGNC Symbol;Acc:HGNC:3613]	chr1	149782671	149791675	1	q21.2	42.01	protein_coding	2155
0.0012422	0.116	227.04	130.3	1.74	7906767	FCGR2B	ENSG00000072694	Fc fragment of IgG receptor IIb [Source:HGNC Symbol;Acc:HGNC:3618]	chr1	161663147	161678654	1	q23.3	47.24	protein_coding	6651
0.0079396	0.174	66.3	98.9	0.67	7909628	FLVCR1	ENSG00000162769	FLVCR heme transporter 1 [Source:HGNC Symbol;Acc:HGNC:24682]	chr1	212858275	212899363	1	q32.3	40.24	protein_coding	6422
0.0074759	0.171	378.95	498.99	0.76	7919606	H2BC18	ENSG00000203814	H2B clustered histone 18 [Source:HGNC Symbol;Acc:HGNC:24700]	chr1	149782689	149812373	-1	q21.2	41.91	protein_coding	3196
0.0033894	0.146	424.79	617.4	0.69	7899774	HDAC1	ENSG00000116478	histone deacetylase 1 [Source:HGNC Symbol;Acc:HGNC:4852]	chr1	32292083	32333635	1	p35.2	46.79	protein_coding	3966
0.0030005	0.144	223.49	325.74	0.69	7925364	HEATR1	ENSG00000119285	HEAT repeat containing 1 [Source:HGNC Symbol;Acc:HGNC:25517]	chr1	236549005	236604516	-1	q43	38.52	protein_coding	9061
0.0036351	0.147	22.72	38.08	0.6	7917612	HFM1	ENSG00000162669	helicase for meiosis 1 [Source:HGNC Symbol;Acc:HGNC:20193]	chr1	91260766	91404856	-1	p22.2	37.16	protein_coding	5814
0.0084531	0.178	127.62	182.9	0.7	7901765	HOOK1	ENSG00000134709	hook microtubule tethering protein 1 [Source:HGNC Symbol;Acc:HGNC:19884]	chr1	59814786	59876322	1	p32.1	34.38	protein_coding	6614
0.0052369	0.165	108.97	76.95	1.42	7906764	HSPA6	ENSG00000173110	heat shock protein family A (Hsp70) member 6 [Source:HGNC Symbol;Acc:HGNC:5239]	chr1	161524540	161526894	1	q23.3	58.64	protein_coding	2355
0.0014133	0.124	125.51	92.52	1.36	7913450	HSPG2	ENSG00000142798	heparan sulfate proteoglycan 2 [Source:HGNC Symbol;Acc:HGNC:5273]	chr1	21822244	21937310	-1	p36.12	56.09	protein_coding	18118
0.0060289	0.165	170.15	112.18	1.52	7896817	ISG15	ENSG00000187608	ISG15 ubiquitin like modifier [Source:HGNC Symbol;Acc:HGNC:4053]	chr1	1001138	1014540	1	p36.33	56.44	protein_coding	867
0.0069579	0.169	23.58	34.99	0.67	7921690	ITLN1	ENSG00000179914	intelectin 1 [Source:HGNC Symbol;Acc:HGNC:18259]	chr1	160876540	160885180	-1	q23.3	47.47	protein_coding	1492
0.0057564	0.165	352.75	216.92	1.63	7914270	LAPTM5	ENSG00000162511	lysosomal protein transmembrane 5 [Source:HGNC Symbol;Acc:HGNC:29612]	chr1	30732469	30757774	-1	p35.2	52.6	protein_coding	3228
0.002878	0.144	143.8	105.42	1.36	7906085	LMNA	ENSG00000160789	lamin A/C [Source:HGNC Symbol;Acc:HGNC:6636]	chr1	156082573	156140081	1	q22	53.03	protein_coding	8141
0.007018	0.17	75.23	48.92	1.54	7906377	MNDA	ENSG00000163563	myeloid cell nuclear differentiation antigen [Source:HGNC Symbol;Acc:HGNC:7183]	chr1	158831351	158849506	1	q23.1	34.66	protein_coding	2025
0.0048647	0.161	311.19	451.55	0.69	7903032	MTF2	ENSG00000143033	metal response element binding transcription factor 2 [Source:HGNC Symbol;Acc:HGNC:29535]	chr1	93079235	93139079	1	p22.1	37.37	protein_coding	5907
0.0001869	0.0664	431.61	221.92	1.94	7902495	NEXN	ENSG00000162614	nexilin F-actin binding protein [Source:HGNC Symbol;Acc:HGNC:29557]	chr1	77888513	77943895	1	p31.1	39.06	protein_coding	4436
0.0042353	0.154	119.91	75.32	1.59	7905606	NPR1	ENSG00000169418	natriuretic peptide receptor 1 [Source:HGNC Symbol;Acc:HGNC:7943]	chr1	153678688	153693992	1	q21.3	55.39	protein_coding	4952
8.7e-06	0.0243	99.37	51.24	1.94	7921882	OLFML2B	ENSG00000162745	olfactomedin like 2B [Source:HGNC Symbol;Acc:HGNC:24558]	chr1	161983192	162023869	-1	q23.3	48.23	protein_coding	3430
0.0073693	0.171	118.68	79.36	1.5	7898057	PDPN	ENSG00000162493	podoplanin [Source:HGNC Symbol;Acc:HGNC:29602]	chr1	13583465	13617957	1	p36.21	45.38	protein_coding	3707
0.0023753	0.139	116.24	163.68	0.71	7919305	PRKAB2	ENSG00000131791	protein kinase AMP-activated non-catalytic subunit beta 2 [Source:HGNC Symbol;Acc:HGNC:9379]	chr1	147155106	147172550	-1	q21.1	39.83	protein_coding	5460
0.0010106	0.106	183.18	80.48	2.28	7907222	PRRX1	ENSG00000116132	paired related homeobox 1 [Source:HGNC Symbol;Acc:HGNC:9142]	chr1	170662728	170739421	1	q24.2	39.17	protein_coding	8248
0.0092231	0.18	84.43	122.08	0.69	7910398	RAB4A	ENSG00000168118	RAB4A, member RAS oncogene family [Source:HGNC Symbol;Acc:HGNC:9781]	chr1	229271062	229305894	1	q42.13	41.32	protein_coding	3310
0.0055504	0.165	84.25	119.96	0.7	7902023	RAVER2	ENSG00000162437	ribonucleoprotein, PTB binding 2 [Source:HGNC Symbol;Acc:HGNC:25577]	chr1	64745095	64833232	1	p31.3	37.2	protein_coding	6070
0.0080918	0.175	140.41	84.06	1.67	7908388	RGS1	ENSG00000090104	regulator of G protein signaling 1 [Source:HGNC Symbol;Acc:HGNC:9991]	chr1	192575763	192580024	1	q31.2	33.81	protein_coding	4074
0.0098319	0.183	123.11	67.45	1.83	7906919	RGS4	ENSG00000117152	regulator of G protein signaling 4 [Source:HGNC Symbol;Acc:HGNC:10000]	chr1	163068775	163076802	1	q23.3	39.47	protein_coding	4729
0.0037394	0.148	28.82	52.94	0.54	7904963	RNVU1-3	ENSG00000201183	RNA, variant U1 small nuclear 3 [Source:HGNC Symbol;Acc:HGNC:48311]	chr1	148402715	148402875	1	q21.2	44.1	snRNA	161
0.0072243	0.171	1067.04	652.49	1.64	7920128	S100A11	ENSG00000163191	S100 calcium binding protein A11 [Source:HGNC Symbol;Acc:HGNC:10488]	chr1	152032506	152047907	-1	q21.3	45.08	protein_coding	649
0.0061909	0.165	138.48	97.86	1.42	7911422	SDF4	ENSG00000078808	stromal cell derived factor 4 [Source:HGNC Symbol;Acc:HGNC:24188]	chr1	1216909	1232067	-1	p36.33	61.39	protein_coding	4744
0.0076351	0.172	48.08	86.26	0.56	7917052	SLC44A5	ENSG00000137968	solute carrier family 44 member 5 [Source:HGNC Symbol;Acc:HGNC:28524]	chr1	75202131	75611116	-1	p31.1	36.99	protein_coding	6299
0.004858	0.161	10.37	17.98	0.58	7909601	SNORA16B	ENSG00000201544	small nucleolar RNA, H/ACA box 16B [Source:HGNC Symbol;Acc:HGNC:32606]	chr1	212352816	212352950	1	q32.3	41.48	snoRNA	135
0.0058866	0.165	39.33	63.01	0.62	7902400	SNORD45B	ENSG00000201487	small nucleolar RNA, C/D box 45B [Source:HGNC Symbol;Acc:HGNC:10185]	chr1	75789477	75789548	1	p31.1	34.72	snoRNA	72
0.0080823	0.175	462.29	643.66	0.72	8039947	SRSF10	ENSG00000188529	serine and arginine rich splicing factor 10 [Source:HGNC Symbol;Acc:HGNC:16713]	chr1	23964347	23980927	-1	p36.11	38.94	protein_coding	11860
0.0043959	0.157	179.38	275.71	0.65	7925130	TARBP1	ENSG00000059588	TAR (HIV-1) RNA binding protein 1 [Source:HGNC Symbol;Acc:HGNC:11568]	chr1	234391313	234479179	-1	q42.2	40.31	protein_coding	7819
0.0087992	0.18	170.29	245	0.7	7910651	TBCE	ENSG00000284770	tubulin folding cofactor E [Source:HGNC Symbol;Acc:HGNC:11582]	chr1	235367360	235452443	1	q42.3	44.21	protein_coding	12444
0.0072732	0.171	113.83	169.93	0.67	7922870	TRMT1L	ENSG00000121486	tRNA methyltransferase 1 like [Source:HGNC Symbol;Acc:HGNC:16782]	chr1	185118101	185157072	-1	q25.3	35.55	protein_coding	4914
0.009702	0.183	166.22	253.33	0.66	7932703	ACBD5	ENSG00000107897	acyl-CoA binding domain containing 5 [Source:HGNC Symbol;Acc:HGNC:23338]	chr10	27168135	27243046	-1	p12.1	41.24	protein_coding	11794
0.0004519	0.0861	1294.47	464.29	2.79	7934906	ACTA2	ENSG00000107796	actin alpha 2, smooth muscle [Source:HGNC Symbol;Acc:HGNC:130]	chr10	88935074	88991339	-1	q23.31	40.29	protein_coding	2976
6.56e-05	0.0498	127.01	55.55	2.29	7936968	ADAM12	ENSG00000148848	ADAM metallopeptidase domain 12 [Source:HGNC Symbol;Acc:HGNC:190]	chr10	126012381	126388477	-1	q26.2	43.11	protein_coding	9882
0.0062688	0.165	73.66	125.89	0.59	7925929	AKR1C3	ENSG00000196139	aldo-keto reductase family 1 member C3 [Source:HGNC Symbol;Acc:HGNC:386]	chr10	5035354	5107686	1	p15.1	40.4	protein_coding	3911
0.0076145	0.172	141.48	229.89	0.62	7928300	ANAPC16	ENSG00000166295	anaphase promoting complex subunit 16 [Source:HGNC Symbol;Acc:HGNC:26976]	chr10	72216000	72235860	1	q22.1	43.46	protein_coding	4324
0.0060575	0.165	173.66	223.09	0.78	7932637	ANKRD26	ENSG00000107890	ankyrin repeat domain 26 [Source:HGNC Symbol;Acc:HGNC:29186]	chr10	26973793	27100494	-1	p12.1	38.75	protein_coding	13564
0.000838	0.103	43.7	29.15	1.5	7926786	APBB1IP	ENSG00000077420	amyloid beta precursor protein binding family B member 1 interacting protein [Source:HGNC Symbol;Acc:HGNC:17379]	chr10	26438341	26567803	1	p12.1	41.53	protein_coding	3843
0.0047096	0.16	129.9	189.86	0.68	7926531	ARL5B	ENSG00000165997	ADP ribosylation factor like GTPase 5B [Source:HGNC Symbol;Acc:HGNC:23052]	chr10	18659431	18681639	1	p12.31	37.18	protein_coding	7170
0.0073333	0.171	111.7	161.48	0.69	7936762	ATE1	ENSG00000107669	arginyltransferase 1 [Source:HGNC Symbol;Acc:HGNC:782]	chr10	121740424	121928492	-1	q26.13	39.06	protein_coding	5385
0.0065588	0.166	326.05	501.39	0.65	7931268	BCCIP	ENSG00000107949	BRCA2 and CDKN1A interacting protein [Source:HGNC Symbol;Acc:HGNC:978]	chr10	125823546	125853695	1	q26.2	42.86	protein_coding	4496
0.008993	0.18	84	50.98	1.65	7927681	BICC1	ENSG00000122870	BicC family RNA binding protein 1 [Source:HGNC Symbol;Acc:HGNC:19351]	chr10	58512872	58831435	1	q21.1	38	protein_coding	6835
0.009054	0.18	132.21	190.69	0.69	7928855	BMPR1A	ENSG00000107779	bone morphogenetic protein receptor type 1A [Source:HGNC Symbol;Acc:HGNC:1076]	chr10	86756601	86932825	1	q23.2	39.9	protein_coding	9518
0.0086181	0.179	40.54	56.48	0.72	7926983	CREM	ENSG00000095794	cAMP responsive element modulator [Source:HGNC Symbol;Acc:HGNC:2352]	chr10	35126791	35212958	1	p11.21	39.22	protein_coding	5699
0.0061102	0.165	118.46	172.02	0.69	7929288	EXOC6	ENSG00000138190	exocyst complex component 6 [Source:HGNC Symbol;Acc:HGNC:23196]	chr10	92826831	93059493	1	q23.33	37.57	protein_coding	6487
0.0011314	0.11	56.24	38.87	1.45	7926105	GATA3	ENSG00000107485	GATA binding protein 3 [Source:HGNC Symbol;Acc:HGNC:4172]	chr10	8045378	8075198	1	p14	51.55	protein_coding	3396
0.0093159	0.18	127.84	93.41	1.37	7931810	KLF6	ENSG00000067082	Kruppel like factor 6 [Source:HGNC Symbol;Acc:HGNC:2235]	chr10	3775996	3785281	-1	p15.2	48.08	protein_coding	6139
0.0097083	0.183	154.4	213.05	0.72	7932433	NSUN6	ENSG00000241058	NOP2/Sun RNA methyltransferase 6 [Source:HGNC Symbol;Acc:HGNC:23529]	chr10	18545561	18659285	-1	p12.31	40.26	protein_coding	3463
0.0017216	0.129	142.95	221.13	0.65	7926807	PDSS1	ENSG00000148459	decaprenyl diphosphate synthase subunit 1 [Source:HGNC Symbol;Acc:HGNC:17759]	chr10	26697701	26746798	1	p12.1	44.16	protein_coding	1913
2.97e-05	0.0352	122.44	66.92	1.83	7928429	PLAU	ENSG00000122861	plasminogen activator, urokinase [Source:HGNC Symbol;Acc:HGNC:9052]	chr10	73909177	73917496	1	q22.2	53.5	protein_coding	2949
0.0046249	0.16	81.51	53.86	1.51	7930980	PLPP4	ENSG00000203805	phospholipid phosphatase 4 [Source:HGNC Symbol;Acc:HGNC:23531]	chr10	120457227	120592065	1	q26.12	42.25	protein_coding	3722
0.0021721	0.136	259.48	415.96	0.62	7936661	PRDX3	ENSG00000165672	peroxiredoxin 3 [Source:HGNC Symbol;Acc:HGNC:9354]	chr10	119167720	119178812	-1	q26.11	45.98	protein_coding	3379
0.0030366	0.144	83.64	148.9	0.56	7932584	PRTFDC1	ENSG00000099256	phosphoribosyl transferase domain containing 1 [Source:HGNC Symbol;Acc:HGNC:23333]	chr10	24848614	24952606	-1	p12.1	41.87	protein_coding	2324
0.0047296	0.16	19.61	27.41	0.72	7927915	STOX1	ENSG00000165730	storkhead box 1 [Source:HGNC Symbol;Acc:HGNC:23508]	chr10	68827531	68895432	1	q22.1	45.18	protein_coding	3914
0.0057223	0.165	155.41	216.1	0.72	7927981	SUPV3L1	ENSG00000156502	Suv3 like RNA helicase [Source:HGNC Symbol;Acc:HGNC:11471]	chr10	69180234	69209099	1	q22.1	41.8	protein_coding	4281
0.0086734	0.179	206.54	306.25	0.67	7936683	TIAL1	ENSG00000151923	TIA1 cytotoxic granule associated RNA binding protein like 1 [Source:HGNC Symbol;Acc:HGNC:11804]	chr10	119571802	119597029	-1	q26.11	38.16	protein_coding	7355
0.0067168	0.166	74.75	57.87	1.29	7930139	TRIM8	ENSG00000171206	tripartite motif containing 8 [Source:HGNC Symbol;Acc:HGNC:15579]	chr10	102644479	102658318	1	q24.32	57.41	protein_coding	5011
0.0077159	0.172	193.78	273.38	0.71	7932023	USP6NL	ENSG00000148429	USP6 N-terminal like [Source:HGNC Symbol;Acc:HGNC:16858]	chr10	11453946	11611754	-1	p14	38.22	protein_coding	14202
0.00479	0.16	90.97	66.75	1.36	7930162	WBP1L	ENSG00000166272	WW domain binding protein 1 like [Source:HGNC Symbol;Acc:HGNC:23510]	chr10	102743948	102834516	1	q24.32	47.4	protein_coding	7833
0.0028172	0.144	200.92	150.92	1.33	7952243	C1QTNF5	ENSG00000223953	C1q and TNF related 5 [Source:HGNC Symbol;Acc:HGNC:14344]	chr11	119338942	119340940	-1	q23.3	68.48	protein_coding	1537
0.0029421	0.144	89.04	63.96	1.39	7951397	CASP1	ENSG00000137752	caspase 1 [Source:HGNC Symbol;Acc:HGNC:1499]	chr11	105025443	105035250	-1	q22.3	36.98	protein_coding	3698
0.0007869	0.099	165.8	113.08	1.47	7946142	CAVIN3	ENSG00000170955	caveolae associated protein 3 [Source:HGNC Symbol;Acc:HGNC:9400]	chr11	6318946	6320532	-1	p15.4	64.65	protein_coding	1557
0.0025672	0.14	121.01	72.29	1.67	7949588	CD248	ENSG00000174807	CD248 molecule [Source:HGNC Symbol;Acc:HGNC:18219]	chr11	66314494	66317044	-1	q13.2	65.39	protein_coding	2551
0.009341	0.18	423.25	305.94	1.38	7937802	CD81	ENSG00000110651	CD81 molecule [Source:HGNC Symbol;Acc:HGNC:1701]	chr11	2376177	2397397	1	p15.5	63.43	protein_coding	7356
0.0052806	0.165	255.78	177.09	1.44	7945666	CTSD	ENSG00000117984	cathepsin D [Source:HGNC Symbol;Acc:HGNC:2529]	chr11	1752752	1764573	-1	p15.5	64.73	protein_coding	5697
0.0060035	0.165	114.26	168.07	0.68	7943580	CUL5	ENSG00000166266	cullin 5 [Source:HGNC Symbol;Acc:HGNC:2556]	chr11	108008898	108107761	1	q22.3	39.36	protein_coding	6562
0.0001329	0.0616	67.55	121.89	0.55	7950628	INTS4	ENSG00000149262	integrator complex subunit 4 [Source:HGNC Symbol;Acc:HGNC:25048]	chr11	77878720	77994671	-1	q14.1	40.73	protein_coding	6067
0.0047525	0.16	69.15	46.72	1.48	7946589	IRAG1	ENSG00000072952	inositol 1,4,5-triphosphate receptor associated 1 [Source:HGNC Symbol;Acc:HGNC:7237]	chr11	10573091	10693988	-1	p15.4	45.65	protein_coding	7700
0.0004537	0.0861	88.37	203.53	0.43	7947199	LGR4	ENSG00000205213	leucine rich repeat containing G protein-coupled receptor 4 [Source:HGNC Symbol;Acc:HGNC:13299]	chr11	27365961	27472790	-1	p14.1	39.09	protein_coding	6355
0.0036052	0.147	138.3	106.25	1.3	7937735	LSP1	ENSG00000130592	lymphocyte specific protein 1 [Source:HGNC Symbol;Acc:HGNC:6707]	chr11	1850904	1892267	1	p15.5	61.57	protein_coding	6221
0.009305	0.18	89.85	59.05	1.52	7938485	MICAL2	ENSG00000133816	microtubule associated monooxygenase, calponin and LIM domain containing 2 [Source:HGNC Symbol;Acc:HGNC:24693]	chr11	12094008	12359144	1	p15.3	45.98	protein_coding	20192
0.001541	0.126	29.15	18.67	1.56	7951309	MMP13	ENSG00000137745	matrix metallopeptidase 13 [Source:HGNC Symbol;Acc:HGNC:7159]	chr11	102942995	102955732	-1	q22.2	36.43	protein_coding	2832
0.0072722	0.171	127.37	161.2	0.79	7942465	MRPL48	ENSG00000175581	mitochondrial ribosomal protein L48 [Source:HGNC Symbol;Acc:HGNC:16653]	chr11	73787872	73865133	1	q13.4	43.34	protein_coding	3830
0.0073721	0.171	57.99	40.35	1.44	7940259	MS4A14	ENSG00000166928	membrane spanning 4-domains A14 [Source:HGNC Symbol;Acc:HGNC:30706]	chr11	60378530	60417756	1	q12.2	38.93	protein_coding	4006
0.0060643	0.165	276.11	171.61	1.61	7948455	MS4A6A	ENSG00000110077	membrane spanning 4-domains A6A [Source:HGNC Symbol;Acc:HGNC:13375]	chr11	60172015	60184666	-1	q12.2	40.18	protein_coding	5547
0.0097312	0.183	124.46	185.71	0.67	7951112	MTMR2	ENSG00000087053	myotubularin related protein 2 [Source:HGNC Symbol;Acc:HGNC:7450]	chr11	95821766	95925315	-1	q21	36.51	protein_coding	13952
7.11e-05	0.0498	78.35	130.32	0.6	7950683	NARS2	ENSG00000137513	asparaginyl-tRNA synthetase 2, mitochondrial [Source:HGNC Symbol;Acc:HGNC:26274]	chr11	78435968	78574874	-1	q14.1	38.77	protein_coding	3146
0.0019683	0.133	106.66	149.15	0.72	7952830	NCAPD3	ENSG00000151503	non-SMC condensin II complex subunit D3 [Source:HGNC Symbol;Acc:HGNC:28952]	chr11	134150113	134225454	-1	q25	43.33	protein_coding	10970
1.19e-05	0.0243	649	241.64	2.69	7943998	NNMT	ENSG00000166741	nicotinamide N-methyltransferase [Source:HGNC Symbol;Acc:HGNC:7861]	chr11	114257787	114313536	1	q23.2	43.32	protein_coding	2596
0.0010863	0.108	103.75	57.34	1.81	7945245	NTM	ENSG00000182667	neurotrimin [Source:HGNC Symbol;Acc:HGNC:17941]	chr11	131370478	132336822	1	q25	43.25	protein_coding	6956
0.0090786	0.18	149.7	217.46	0.69	7942476	PAAF1	ENSG00000175575	proteasomal ATPase associated factor 1 [Source:HGNC Symbol;Acc:HGNC:25687]	chr11	73876699	73931114	1	q13.4	42.99	protein_coding	7922
0.0055478	0.165	355.38	546.29	0.65	7950578	PAK1	ENSG00000149269	p21 (RAC1) activated kinase 1 [Source:HGNC Symbol;Acc:HGNC:8590]	chr11	77322017	77474635	-1	q14.1	39.9	protein_coding	6021
0.0072181	0.171	49.51	36.8	1.35	7942569	SLCO2B1	ENSG00000137491	solute carrier organic anion transporter family member 2B1 [Source:HGNC Symbol;Acc:HGNC:10962]	chr11	75100563	75206549	1	q13.4	47.99	protein_coding	10277
0.0008018	0.1	159.31	309.18	0.52	7948908	SNORD26	ENSG00000276788	small nucleolar RNA, C/D box 26 [Source:HGNC Symbol;Acc:HGNC:10148]	chr11	62855292	62855366	-1	q12.3	40	snoRNA	75
0.002447	0.14	201.85	317.53	0.64	7948900	SNORD30	ENSG00000277846	small nucleolar RNA, C/D box 30 [Source:HGNC Symbol;Acc:HGNC:10157]	chr11	62853663	62853732	-1	q12.3	41.43	snoRNA	70
8.86e-05	0.0537	146.03	65.16	2.24	7944082	TAGLN	ENSG00000149591	transgelin [Source:HGNC Symbol;Acc:HGNC:11553]	chr11	117199370	117207464	1	q23.3	56.95	protein_coding	6550
4.43e-05	0.0465	250.37	118.04	2.12	7952268	THY1	ENSG00000154096	Thy-1 cell surface antigen [Source:HGNC Symbol;Acc:HGNC:11801]	chr11	119415476	119424985	-1	q23.3	55.73	protein_coding	6900
0.00597	0.165	72.75	108.48	0.67	7942964	TMEM135	ENSG00000166575	transmembrane protein 135 [Source:HGNC Symbol;Acc:HGNC:26167]	chr11	87037844	87328824	1	q14.2	36.37	protein_coding	10096
0.0088704	0.18	293.21	164.76	1.78	7938035	TRIM22	ENSG00000132274	tripartite motif containing 22 [Source:HGNC Symbol;Acc:HGNC:16379]	chr11	5689697	5737089	1	p15.4	38.58	protein_coding	5944
0.0071422	0.171	59.85	88.2	0.68	7951734	ZW10	ENSG00000086827	zw10 kinetochore protein [Source:HGNC Symbol;Acc:HGNC:13194]	chr11	113733187	113773735	-1	q23.2	39.08	protein_coding	2916
0.009158	0.18	86.81	47.17	1.84	7961710	ABCC9	ENSG00000069431	ATP binding cassette subfamily C member 9 [Source:HGNC Symbol;Acc:HGNC:60]	chr12	21797389	21942543	-1	p12.1	36.12	protein_coding	17483
0.0063538	0.166	138.54	184.2	0.75	7962185	AMN1	ENSG00000151743	antagonist of mitotic exit network 1 homolog [Source:HGNC Symbol;Acc:HGNC:27281]	chr12	31671142	31729121	-1	p11.21	40.53	protein_coding	3137
0.0040872	0.153	593.22	412.36	1.44	7961532	ARHGDIB	ENSG00000111348	Rho GDP dissociation inhibitor beta [Source:HGNC Symbol;Acc:HGNC:679]	chr12	14942031	14961728	-1	p12.3	41.11	protein_coding	2042
0.0067826	0.167	41.99	29.69	1.41	7963289	BIN2	ENSG00000110934	bridging integrator 2 [Source:HGNC Symbol;Acc:HGNC:1053]	chr12	51281038	51324668	-1	q13.13	44.59	protein_coding	3986
0.0032154	0.144	307.43	182.54	1.68	7960744	C1R	ENSG00000159403	complement C1r [Source:HGNC Symbol;Acc:HGNC:1246]	chr12	7080214	7092540	-1	p13.31	51.55	protein_coding	5803
0.0092779	0.18	436.14	199.4	2.19	7953603	C1S	ENSG00000182326	complement C1s [Source:HGNC Symbol;Acc:HGNC:1247]	chr12	6988259	7071032	1	p13.31	45.02	protein_coding	6462
0.0058227	0.165	18.39	26.73	0.69	7964997	CAPS2	ENSG00000180881	calcyphosine 2 [Source:HGNC Symbol;Acc:HGNC:16471]	chr12	75275979	75390928	-1	q21.2	35.15	protein_coding	6689
0.0061088	0.165	73.6	55.54	1.33	7953428	CD4	ENSG00000010610	CD4 molecule [Source:HGNC Symbol;Acc:HGNC:1678]	chr12	6786858	6820799	1	p13.31	48.56	protein_coding	4557
1.06e-05	0.0243	75.51	18.32	4.12	7965390	EPYC	ENSG00000083782	epiphycan [Source:HGNC Symbol;Acc:HGNC:3053]	chr12	90963682	91005026	-1	q21.33	34.86	protein_coding	1802
0.0077618	0.172	109.86	172.64	0.64	7966321	GPN3	ENSG00000111231	GPN-loop GTPase 3 [Source:HGNC Symbol;Acc:HGNC:30186]	chr12	110452486	110469268	-1	q24.11	45.03	protein_coding	2593
0.0046752	0.16	111.79	73.05	1.53	7963427	KRT5	ENSG00000186081	keratin 5 [Source:HGNC Symbol;Acc:HGNC:6442]	chr12	52514575	52520530	-1	q13.13	50.81	protein_coding	4133
0.0002383	0.0758	145.34	86.38	1.68	7956301	LRP1	ENSG00000123384	LDL receptor related protein 1 [Source:HGNC Symbol;Acc:HGNC:6692]	chr12	57128483	57213361	1	q13.3	56.24	protein_coding	20859
0.0052446	0.165	65.97	102.45	0.64	7961365	MANSC1	ENSG00000111261	MANSC domain containing 1 [Source:HGNC Symbol;Acc:HGNC:25505]	chr12	12326056	12350242	-1	p13.2	43.98	protein_coding	5716
0.002629	0.143	84.53	54.38	1.55	7956856	MSRB3	ENSG00000174099	methionine sulfoxide reductase B3 [Source:HGNC Symbol;Acc:HGNC:27375]	chr12	65278643	65491430	1	q14.3	37.12	protein_coding	7405
0.0066352	0.166	77.39	49.23	1.57	7966026	NUAK1	ENSG00000074590	NUAK family kinase 1 [Source:HGNC Symbol;Acc:HGNC:14311]	chr12	106063345	106138954	-1	q23.3	45.55	protein_coding	5924
0.0085637	0.179	88.84	59.06	1.5	7958895	OAS3	ENSG00000111331	2'-5'-oligoadenylate synthetase 3 [Source:HGNC Symbol;Acc:HGNC:8088]	chr12	112938051	112976460	1	q24.13	46.81	protein_coding	18045
0.003541	0.147	119.28	73.96	1.61	7957570	PLXNC1	ENSG00000136040	plexin C1 [Source:HGNC Symbol;Acc:HGNC:9106]	chr12	94148577	94307675	1	q22	43.77	protein_coding	10033
0.0036772	0.148	284.16	449.87	0.63	7953218	RAD51AP1	ENSG00000111247	RAD51 associated protein 1 [Source:HGNC Symbol;Acc:HGNC:16956]	chr12	4538798	4560047	1	p13.32	36.4	protein_coding	2557
0.00735	0.171	81.64	64.24	1.27	7962625	RAPGEF3	ENSG00000079337	Rap guanine nucleotide exchange factor 3 [Source:HGNC Symbol;Acc:HGNC:16629]	chr12	47734363	47771040	-1	q13.11	54.34	protein_coding	12106
0.000302	0.0767	247.33	162.47	1.52	7964119	STAT2	ENSG00000170581	signal transducer and activator of transcription 2 [Source:HGNC Symbol;Acc:HGNC:11363]	chr12	56341597	56360167	-1	q13.3	47.76	protein_coding	6198
0.0041218	0.153	27.84	46.83	0.59	7961281	TAS2R50	ENSG00000212126	taste 2 receptor member 50 [Source:HGNC Symbol;Acc:HGNC:18882]	chr12	10985913	10986912	-1	p13.2	38.5	protein_coding	1000
0.0044106	0.157	57.76	41.82	1.38	7962689	VDR	ENSG00000111424	vitamin D receptor [Source:HGNC Symbol;Acc:HGNC:12679]	chr12	47841537	47943048	-1	q13.11	47.72	protein_coding	5674
0.0088953	0.18	82.4	119.77	0.69	7960134	ZNF26	ENSG00000198393	zinc finger protein 26 [Source:HGNC Symbol;Acc:HGNC:13053]	chr12	132986365	133032952	1	q24.33	43.05	protein_coding	20862
0.0085679	0.179	109.44	74.06	1.48	7972750	COL4A1	ENSG00000187498	collagen type IV alpha 1 chain [Source:HGNC Symbol;Acc:HGNC:2202]	chr13	110148963	110307157	-1	q34	44.9	protein_coding	14662
0.0021284	0.135	150.44	106.61	1.41	7970033	COL4A2	ENSG00000134871	collagen type IV alpha 2 chain [Source:HGNC Symbol;Acc:HGNC:2203]	chr13	110305812	110513209	1	q34	47.83	protein_coding	19271
0.0058019	0.165	233.67	323.71	0.72	7972336	DZIP1	ENSG00000134874	DAZ interacting zinc finger protein 1 [Source:HGNC Symbol;Acc:HGNC:20908]	chr13	95578202	95644706	-1	q32.1	41.42	protein_coding	8473
0.0076429	0.172	25.74	20.45	1.26	7971311	ENOX1	ENSG00000120658	ecto-NOX disulfide-thiol exchanger 1 [Source:HGNC Symbol;Acc:HGNC:25474]	chr13	43213518	43786908	-1	q14.11	39.04	protein_coding	3101
0.0064711	0.166	136.91	86.05	1.59	7970329	GAS6	ENSG00000183087	growth arrest specific 6 [Source:HGNC Symbol;Acc:HGNC:4168]	chr13	113820549	113864076	-1	q34	57.6	protein_coding	6015
0.00101	0.106	77.09	44.47	1.73	7970441	GJB2	ENSG00000165474	gap junction protein beta 2 [Source:HGNC Symbol;Acc:HGNC:4284]	chr13	20187463	20192938	-1	q12.11	49.38	protein_coding	2474
0.0001444	0.0622	190.54	70.59	2.7	7969861	ITGBL1	ENSG00000198542	integrin subunit beta like 1 [Source:HGNC Symbol;Acc:HGNC:6164]	chr13	101452593	101720856	1	q33.1	36.42	protein_coding	6176
0.0036069	0.147	183.14	122.29	1.5	7971150	LHFPL6	ENSG00000183722	LHFPL tetraspan subfamily member 6 [Source:HGNC Symbol;Acc:HGNC:6586]	chr13	39209116	39603528	-1	q14.11	39.07	protein_coding	4564
0.0053577	0.165	30.5	45.44	0.67	7969576	MIR17HG	ENSG00000215417	miR-17-92a-1 cluster host gene [Source:HGNC Symbol;Acc:HGNC:23564]	chr13	91347820	91354579	1	q31.3	44.48	lncRNA	3774
0.0009009	0.105	49.3	78.17	0.63	7968761	NAA16	ENSG00000172766	N-alpha-acetyltransferase 16, NatA auxiliary subunit [Source:HGNC Symbol;Acc:HGNC:26164]	chr13	41311267	41377030	1	q14.11	37.31	protein_coding	5805
0.0037553	0.148	126.8	173.33	0.73	7972867	PCID2	ENSG00000126226	PCI domain containing 2 [Source:HGNC Symbol;Acc:HGNC:25653]	chr13	113177536	113208715	-1	q34	43.4	protein_coding	6246
0.0022417	0.139	204.35	304.6	0.67	7969390	PIBF1	ENSG00000083535	progesterone immunomodulatory binding factor 1 [Source:HGNC Symbol;Acc:HGNC:23352]	chr13	72782133	73016461	1	q21.33	36.99	protein_coding	4179
0.0079404	0.174	679.99	199.84	3.4	7971077	POSTN	ENSG00000133110	periostin [Source:HGNC Symbol;Acc:HGNC:16953]	chr13	37562583	37598844	-1	q13.3	32.94	protein_coding	5464
0.0058227	0.165	95.47	73.37	1.3	7972438	RNF113B	ENSG00000139797	ring finger protein 113B [Source:HGNC Symbol;Acc:HGNC:17267]	chr13	98175785	98177269	-1	q32.2	54.88	protein_coding	1380
0.0017575	0.13	98.93	161.34	0.61	7972369	UGGT2	ENSG00000102595	UDP-glucose glycoprotein glucosyltransferase 2 [Source:HGNC Symbol;Acc:HGNC:15664]	chr13	95801580	96053482	-1	q32.1	37.01	protein_coding	8105
0.0018985	0.133	94.6	135.84	0.7	7971246	VWA8	ENSG00000102763	von Willebrand factor A domain containing 8 [Source:HGNC Symbol;Acc:HGNC:29071]	chr13	41566835	41961120	-1	q14.11	37.16	protein_coding	7635
0.0077427	0.172	99.71	134.76	0.74	7970524	ZDHHC20	ENSG00000180776	zinc finger DHHC-type palmitoyltransferase 20 [Source:HGNC Symbol;Acc:HGNC:20749]	chr13	21372571	21459370	-1	q12.11	39.65	protein_coding	5576
0.0066606	0.166	422.09	292.9	1.44	7979824	ACTN1	ENSG00000072110	actinin alpha 1 [Source:HGNC Symbol;Acc:HGNC:163]	chr14	68874128	68979440	-1	q24.1	50.81	protein_coding	14320
0.002281	0.139	228.02	126.93	1.8	7981514	AHNAK2	ENSG00000185567	AHNAK nucleoprotein 2 [Source:HGNC Symbol;Acc:HGNC:20125]	chr14	104937244	104978374	-1	q32.33	57.29	protein_coding	18788
0.0004212	0.0861	241.16	143.62	1.68	7977409	CRIP1	ENSG00000213145	cysteine rich protein 1 [Source:HGNC Symbol;Acc:HGNC:2360]	chr14	105486317	105488947	1	q32.33	68.07	protein_coding	2485
0.0046502	0.16	27.33	21.11	1.29	7980485	DIO2	ENSG00000211448	iodothyronine deiodinase 2 [Source:HGNC Symbol;Acc:HGNC:2884]	chr14	80197526	80387757	-1	q31.1	37.62	protein_coding	7393
0.0005478	0.088	175.27	86.45	2.03	8001104	IGHA1	ENSG00000211895	immunoglobulin heavy constant alpha 1 [Source:HGNC Symbol;Acc:HGNC:5478]	chr14	105703995	105708665	-1	q32.33	60.69	IG_C_gene	1422
0.0005788	0.0894	383.06	161.44	2.37	7995263	IGHA1	ENSG00000211895	immunoglobulin heavy constant alpha 1 [Source:HGNC Symbol;Acc:HGNC:5478]	chr14	105703995	105708665	-1	q32.33	60.69	IG_C_gene	1422
0.0047433	0.16	115.16	49.67	2.32	7981730	IGHA1	ENSG00000211895	immunoglobulin heavy constant alpha 1 [Source:HGNC Symbol;Acc:HGNC:5478]	chr14	105703995	105708665	-1	q32.33	60.69	IG_C_gene	1422
0.0005884	0.0899	392.2	141.67	2.77	7981722	IGHA1	ENSG00000211895	immunoglobulin heavy constant alpha 1 [Source:HGNC Symbol;Acc:HGNC:5478]	chr14	105703995	105708665	-1	q32.33	60.69	IG_C_gene	1422
0.0054463	0.165	114.81	66.84	1.72	7981718	IGHG1	ENSG00000211896	immunoglobulin heavy constant gamma 1 (G1m marker) [Source:HGNC Symbol;Acc:HGNC:5525]	chr14	105736343	105743071	-1	q32.33	63	IG_C_gene	2762
0.0001141	0.0601	154.98	93.08	1.67	7980152	LTBP2	ENSG00000119681	latent transforming growth factor beta binding protein 2 [Source:HGNC Symbol;Acc:HGNC:6715]	chr14	74498183	74612378	-1	q24.3	51.68	protein_coding	9078
9.82e-05	0.0537	233.9	131.14	1.78	7973336	MMP14	ENSG00000157227	matrix metallopeptidase 14 [Source:HGNC Symbol;Acc:HGNC:7160]	chr14	22836560	22849041	1	q11.2	57.24	protein_coding	4623
0.0002931	0.0763	88.17	59.8	1.47	7977046	TNFAIP2	ENSG00000185215	TNF alpha induced protein 2 [Source:HGNC Symbol;Acc:HGNC:11895]	chr14	103121476	103137439	1	q32.32	61.66	protein_coding	5058
0.0037745	0.148	36.52	27.14	1.35	7985522	ADAMTSL3	ENSG00000156218	ADAMTS like 3 [Source:HGNC Symbol;Acc:HGNC:14633]	chr15	83654088	84039842	1	q25.2	39.81	protein_coding	9752
0.0016551	0.128	102.87	67.01	1.54	7986446	ALDH1A3	ENSG00000184254	aldehyde dehydrogenase 1 family member A3 [Source:HGNC Symbol;Acc:HGNC:409]	chr15	100877714	100916626	1	q26.3	48.81	protein_coding	5335
0.0065784	0.166	41.96	64.47	0.65	7984124	APH1B	ENSG00000138613	aph-1 homolog B, gamma-secretase subunit [Source:HGNC Symbol;Acc:HGNC:24080]	chr15	63276018	63309126	1	q22.2	40.76	protein_coding	5443
0.0034536	0.147	86.21	119.32	0.72	7982287	ARHGAP11B	ENSG00000285077	Rho GTPase activating protein 11B [Source:HGNC Symbol;Acc:HGNC:15782]	chr15	30624494	30649529	1	q13.2	38.13	protein_coding	4280
0.0033977	0.146	60.42	88.83	0.68	7984686	BBS4	ENSG00000140463	Bardet-Biedl syndrome 4 [Source:HGNC Symbol;Acc:HGNC:969]	chr15	72686179	72738475	1	q24.1	40.76	protein_coding	4148
0.0062348	0.165	200.15	91.27	2.19	7988467	FBN1	ENSG00000166147	fibrillin 1 [Source:HGNC Symbol;Acc:HGNC:3603]	chr15	48408313	48645721	-1	q21.1	38.91	protein_coding	18525
0.0020646	0.135	56.35	23.27	2.42	7983630	FGF7	ENSG00000140285	fibroblast growth factor 7 [Source:HGNC Symbol;Acc:HGNC:3685]	chr15	49423237	49488775	1	q21.2	33.83	protein_coding	6516
0.0025534	0.14	72.44	40.69	1.78	8161455	FGF7	ENSG00000140285	fibroblast growth factor 7 [Source:HGNC Symbol;Acc:HGNC:3685]	chr15	49423237	49488775	1	q21.2	33.83	protein_coding	6516
0.0014866	0.125	84.66	55.46	1.53	7982377	GREM1	ENSG00000166923	gremlin 1, DAN family BMP antagonist [Source:HGNC Symbol;Acc:HGNC:2001]	chr15	32718004	32745106	1	q13.3	41.45	protein_coding	14784
2.1e-05	0.0299	101.49	47.33	2.14	7989985	ITGA11	ENSG00000137809	integrin subunit alpha 11 [Source:HGNC Symbol;Acc:HGNC:6136]	chr15	68296532	68432163	-1	q23	49.23	protein_coding	10866
0.0010977	0.108	132.53	98.21	1.35	7984771	LOXL1	ENSG00000129038	lysyl oxidase like 1 [Source:HGNC Symbol;Acc:HGNC:6665]	chr15	73925989	73952137	1	q24.1	55.02	protein_coding	3637
0.0039704	0.151	63.21	90.56	0.7	7986394	LRRC28	ENSG00000168904	leucine rich repeat containing 28 [Source:HGNC Symbol;Acc:HGNC:28355]	chr15	99251362	99390729	1	q26.3	38.12	protein_coding	9279
0.0074485	0.171	84.19	67.17	1.25	7986463	LRRK1	ENSG00000154237	leucine rich repeat kinase 1 [Source:HGNC Symbol;Acc:HGNC:18608]	chr15	100919327	101078257	1	q26.3	45.99	protein_coding	17491
0.0041278	0.153	240.15	341.83	0.7	7982957	MGA	ENSG00000174197	MAX dimerization protein MGA [Source:HGNC Symbol;Acc:HGNC:14010]	chr15	41621134	41773081	1	q15.1	40.42	protein_coding	19590
0.0027899	0.144	279.19	375.49	0.74	7988444	MYEF2	ENSG00000104177	myelin expression factor 2 [Source:HGNC Symbol;Acc:HGNC:17940]	chr15	48134632	48178353	-1	q21.1	33.78	protein_coding	13902
0.0060372	0.165	53.78	78.21	0.69	7983553	SLC24A5	ENSG00000188467	solute carrier family 24 member 5 [Source:HGNC Symbol;Acc:HGNC:20611]	chr15	48120990	48142672	1	q21.1	35.31	protein_coding	4760
0.0003639	0.0834	420.43	159.79	2.63	7982597	THBS1	ENSG00000137801	thrombospondin 1 [Source:HGNC Symbol;Acc:HGNC:11785]	chr15	39581079	39599466	1	q14	43.51	protein_coding	9158
0.0062541	0.165	51.85	75.44	0.69	7983157	TMEM62	ENSG00000137842	transmembrane protein 62 [Source:HGNC Symbol;Acc:HGNC:26269]	chr15	43123279	43185144	1	q15.2	40.55	protein_coding	4746
0.0047942	0.16	94.91	135.18	0.7	7987981	UBR1	ENSG00000159459	ubiquitin protein ligase E3 component n-recognin 1 [Source:HGNC Symbol;Acc:HGNC:16808]	chr15	42942897	43106113	-1	q15.2	39.81	protein_coding	9928
0.0007661	0.099	103.62	215.57	0.48	7993756	ACSM3	ENSG00000005187	acyl-CoA synthetase medium chain family member 3 [Source:HGNC Symbol;Acc:HGNC:10522]	chr16	20610243	20797581	1	p12.3	41.08	protein_coding	7510
0.0090871	0.18	39.56	30.1	1.31	7994353	APOBR	ENSG00000184730	apolipoprotein B receptor [Source:HGNC Symbol;Acc:HGNC:24087]	chr16	28494643	28498970	1	p12.1	62.52	protein_coding	3798
0.0037891	0.148	101.26	163.49	0.62	7993167	ATF7IP2	ENSG00000166669	activating transcription factor 7 interacting protein 2 [Source:HGNC Symbol;Acc:HGNC:20397]	chr16	10326434	10483638	1	p13.2	41.4	protein_coding	6391
0.0089177	0.18	98.57	45.42	2.17	7997139	CALB2	ENSG00000172137	calbindin 2 [Source:HGNC Symbol;Acc:HGNC:1435]	chr16	71358713	71390436	1	q22.2	49.04	protein_coding	1701
0.0097625	0.183	399.74	189.74	2.11	8001800	CDH11	ENSG00000140937	cadherin 11 [Source:HGNC Symbol;Acc:HGNC:1750]	chr16	64943753	65126112	-1	q21	40.38	protein_coding	13275
0.0030538	0.144	82.04	125.26	0.65	7997381	CENPN	ENSG00000166451	centromere protein N [Source:HGNC Symbol;Acc:HGNC:30873]	chr16	81006552	81033114	1	q23.2	43.2	protein_coding	5677
1.54e-05	0.0243	100.08	48.01	2.08	7997642	CRISPLD2	ENSG00000103196	cysteine rich secretory protein LCCL domain containing 2 [Source:HGNC Symbol;Acc:HGNC:25248]	chr16	84819985	84920768	1	q24.1	50.35	protein_coding	7962
0.0081641	0.175	100.61	146.57	0.69	7997048	DDX19B	ENSG00000157349	DEAD-box helicase 19B [Source:HGNC Symbol;Acc:HGNC:2742]	chr16	70289663	70335305	1	q22.1	45.56	protein_coding	4455
0.0044727	0.158	114.36	155.01	0.74	8002999	GCSH	ENSG00000140905	glycine cleavage system protein H [Source:HGNC Symbol;Acc:HGNC:4208]	chr16	81081945	81096395	-1	q23.2	43.85	protein_coding	3640
0.0042439	0.154	70.24	46.47	1.51	7997712	IRF8	ENSG00000140968	interferon regulatory factor 8 [Source:HGNC Symbol;Acc:HGNC:5358]	chr16	85899162	85922606	1	q24.1	49.68	protein_coding	4800
0.0096049	0.183	240.81	360.23	0.67	8001211	ITFG1	ENSG00000129636	integrin alpha FG-GAP repeat containing 1 [Source:HGNC Symbol;Acc:HGNC:30697]	chr16	47154387	47464149	-1	q12.1	37.51	protein_coding	7719
0.0066131	0.166	40.56	27.7	1.46	7994826	ITGAL	ENSG00000005844	integrin subunit alpha L [Source:HGNC Symbol;Acc:HGNC:6148]	chr16	30472658	30523567	1	p11.2	50.45	protein_coding	9864
0.0019243	0.133	331.02	119.54	2.77	7995681	MMP2	ENSG00000087245	matrix metallopeptidase 2 [Source:HGNC Symbol;Acc:HGNC:7166]	chr16	55389700	55506691	1	q12.2	45.67	protein_coding	4706
0.0065669	0.166	797.46	533.33	1.5	8000574	NUPR1	ENSG00000176046	nuclear protein 1, transcriptional regulator [Source:HGNC Symbol;Acc:HGNC:29990]	chr16	28532708	28539008	-1	p11.2	50.5	protein_coding	5508
0.0038975	0.15	118.99	79.04	1.51	8002133	PSMB10	ENSG00000205220	proteasome 20S subunit beta 10 [Source:HGNC Symbol;Acc:HGNC:9538]	chr16	67934506	67936864	-1	q22.1	62.06	protein_coding	1626
0.0033242	0.145	411.38	552.08	0.75	7997099	SF3B3	ENSG00000189091	splicing factor 3b subunit 3 [Source:HGNC Symbol;Acc:HGNC:10770]	chr16	70523791	70577670	1	q22.1	43.72	protein_coding	12416
0.0027859	0.144	198.35	119.44	1.66	7992789	TNFRSF12A	ENSG00000006327	TNF receptor superfamily member 12A [Source:HGNC Symbol;Acc:HGNC:18152]	chr16	3018445	3022383	1	p13.3	60.12	protein_coding	1801
0.0008789	0.104	214.41	327.22	0.66	7996891	UTP4	ENSG00000141076	UTP4 small subunit processome component [Source:HGNC Symbol;Acc:HGNC:1983]	chr16	69131291	69231130	1	q22.1	43.98	protein_coding	5600
0.0077884	0.172	413.44	551.58	0.75	8001149	VPS35	ENSG00000069329	VPS35 retromer complex component [Source:HGNC Symbol;Acc:HGNC:13487]	chr16	46656132	46689518	-1	q11.2	38.86	protein_coding	9733
0.0001635	0.0628	66.17	103.91	0.64	7992877	ZNF75A	ENSG00000162086	zinc finger protein 75a [Source:HGNC Symbol;Acc:HGNC:13146]	chr16	3305406	3318852	1	p13.3	45.02	protein_coding	8063
0.0082971	0.177	98.33	67.12	1.46	8006779	ARHGAP23	ENSG00000275832	Rho GTPase activating protein 23 [Source:HGNC Symbol;Acc:HGNC:29293]	chr17	38419280	38512385	1	q12	55.44	protein_coding	8080
0.0002953	0.0763	118.15	72.16	1.64	8010287	C1QTNF1	ENSG00000173918	C1q and TNF related 1 [Source:HGNC Symbol;Acc:HGNC:14324]	chr17	79022814	79049788	1	q25.3	54.12	protein_coding	4755
0.0024191	0.139	82.24	49.4	1.66	8015635	CAVIN1	ENSG00000177469	caveolae associated protein 1 [Source:HGNC Symbol;Acc:HGNC:9688]	chr17	42402449	42423256	-1	q21.2	52.49	protein_coding	3570
0.0027071	0.144	288.52	185.72	1.55	8004510	CD68	ENSG00000129226	CD68 molecule [Source:HGNC Symbol;Acc:HGNC:1693]	chr17	7579491	7582111	1	p13.1	55.89	protein_coding	2163
9.3e-06	0.0243	533.28	196.25	2.72	8016646	COL1A1	ENSG00000108821	collagen type I alpha 1 chain [Source:HGNC Symbol;Acc:HGNC:2197]	chr17	50184101	50201632	-1	q21.33	58.48	protein_coding	9007
0.0002877	0.0763	161.14	97.78	1.65	8016390	COPZ2	ENSG00000005243	COPI coat complex subunit zeta 2 [Source:HGNC Symbol;Acc:HGNC:19356]	chr17	48026167	48038030	-1	q21.32	52.71	protein_coding	1866
0.0002917	0.0763	71.6	47.2	1.52	8012605	GAS7	ENSG00000007237	growth arrest specific 7 [Source:HGNC Symbol;Acc:HGNC:4169]	chr17	9910606	10198606	-1	p13.1	47.97	protein_coding	10158
0.0005112	0.0865	86.16	133.93	0.64	8017283	INTS2	ENSG00000108506	integrator complex subunit 2 [Source:HGNC Symbol;Acc:HGNC:29241]	chr17	61865367	61928016	-1	q23.2	39.68	protein_coding	8627
0.0015669	0.126	130.22	76.04	1.71	8008237	ITGA3	ENSG00000005884	integrin subunit alpha 3 [Source:HGNC Symbol;Acc:HGNC:6139]	chr17	50055968	50090481	1	q21.33	52.64	protein_coding	9802
0.0024172	0.139	83.09	58.69	1.42	8009951	ITGB4	ENSG00000132470	integrin subunit beta 4 [Source:HGNC Symbol;Acc:HGNC:6158]	chr17	75721328	75757818	1	q25.1	57.98	protein_coding	6761
0.0061346	0.165	47.32	34.18	1.38	8004331	KCTD11	ENSG00000213859	potassium channel tetramerization domain containing 11 [Source:HGNC Symbol;Acc:HGNC:21302]	chr17	7351889	7354944	1	p13.1	60.44	protein_coding	3056
0.0032636	0.144	156.01	99.45	1.57	8015387	KRT17	ENSG00000128422	keratin 17 [Source:HGNC Symbol;Acc:HGNC:6427]	chr17	41619442	41624842	-1	q21.2	58.67	protein_coding	2996
0.0057145	0.165	270.4	375.07	0.72	8017688	LRRC37A2	ENSG00000238083	leucine rich repeat containing 37 member A2 [Source:HGNC Symbol;Acc:HGNC:32404]	chr17	46511511	46555650	1	q21.31	42.64	protein_coding	6756
0.0050296	0.163	104.19	158.34	0.66	8006336	LRRC37B	ENSG00000185158	leucine rich repeat containing 37B [Source:HGNC Symbol;Acc:HGNC:29070]	chr17	32007872	32053504	1	q11.2	42.83	protein_coding	6281
0.0055465	0.165	145.87	76.47	1.91	8013341	MFAP4	ENSG00000166482	microfibril associated protein 4 [Source:HGNC Symbol;Acc:HGNC:7035]	chr17	19383442	19387190	-1	p11.2	56.87	protein_coding	2102
0.0071144	0.171	43.61	28.63	1.52	8005235	MPRIP	ENSG00000133030	myosin phosphatase Rho interacting protein [Source:HGNC Symbol;Acc:HGNC:30321]	chr17	17042457	17217679	1	p11.2	51.31	protein_coding	18404
0.006037	0.165	121.01	162.17	0.75	8016870	MRPS23	ENSG00000181610	mitochondrial ribosomal protein S23 [Source:HGNC Symbol;Acc:HGNC:14509]	chr17	57834781	57850056	-1	q22	44.44	protein_coding	6379
0.007355	0.171	151.94	112.04	1.36	8011027	MYO1C	ENSG00000197879	myosin IC [Source:HGNC Symbol;Acc:HGNC:7597]	chr17	1464186	1492686	-1	p13.3	60.08	protein_coding	7806
0.0078948	0.173	268.53	194.06	1.38	8014706	PCGF2	ENSG00000277258	polycomb group ring finger 2 [Source:HGNC Symbol;Acc:HGNC:12929]	chr17	38733898	38749817	-1	q12	57.07	protein_coding	3510
0.0056022	0.165	67.68	53.46	1.27	8014768	PLXDC1	ENSG00000161381	plexin domain containing 1 [Source:HGNC Symbol;Acc:HGNC:20945]	chr17	39063313	39154394	-1	q12	50.88	protein_coding	9255
0.0016784	0.128	98.03	69.34	1.41	8017039	SEPTIN4	ENSG00000108387	septin 4 [Source:HGNC Symbol;Acc:HGNC:9165]	chr17	58520250	58544368	-1	q22	51.95	protein_coding	10135
0.0002214	0.0749	185.69	76.09	2.44	8003667	SERPINF1	ENSG00000132386	serpin family F member 1 [Source:HGNC Symbol;Acc:HGNC:8824]	chr17	1762029	1777565	1	p13.3	53.51	protein_coding	2990
0.0062808	0.165	81.7	141.29	0.58	8017133	SKA2	ENSG00000182628	spindle and kinetochore associated complex subunit 2 [Source:HGNC Symbol;Acc:HGNC:28006]	chr17	59109857	59155260	-1	q22	41.22	protein_coding	3233
0.0063071	0.165	591.11	407.8	1.45	8006531	SLFN5	ENSG00000166750	schlafen family member 5 [Source:HGNC Symbol;Acc:HGNC:28286]	chr17	35243071	35273655	1	q12	41.59	protein_coding	10674
0.0025215	0.14	292.42	145.57	2.01	8180372	ST6GALNAC2	ENSG00000070731	ST6 N-acetylgalactosaminide alpha-2,6-sialyltransferase 2 [Source:HGNC Symbol;Acc:HGNC:10867]	chr17	76565377	76586956	-1	q25.1	54.09	protein_coding	3002
0.0010088	0.106	76	116.34	0.65	8008566	STXBP4	ENSG00000166263	syntaxin binding protein 4 [Source:HGNC Symbol;Acc:HGNC:19694]	chr17	54968727	55173632	1	q22	36.22	protein_coding	18055
0.0096353	0.183	170.68	133.15	1.28	8019716	TBC1D3C	ENSG00000278299	TBC1 domain family member 3C [Source:HGNC Symbol;Acc:HGNC:24889]	chr17	38057693	38068634	-1	q12	60.14	protein_coding	2105
0.0012615	0.116	99.26	180.34	0.55	8008564	TOM1L1	ENSG00000141198	target of myb1 like 1 membrane trafficking protein [Source:HGNC Symbol;Acc:HGNC:11983]	chr17	54899387	54961956	1	q22	41.1	protein_coding	7275
0.0031669	0.144	92.96	133.84	0.69	8017150	TUBD1	ENSG00000108423	tubulin delta 1 [Source:HGNC Symbol;Acc:HGNC:16811]	chr17	59859479	59892945	-1	q23.1	45.29	protein_coding	3333
0.0002558	0.0758	25.51	15.28	1.67	8023528	ALPK2	ENSG00000198796	alpha kinase 2 [Source:HGNC Symbol;Acc:HGNC:20565]	chr18	58481247	58629091	-1	q21.32	44.38	protein_coding	9565
0.006302	0.165	133.75	84.94	1.57	8021685	CCDC102B	ENSG00000150636	coiled-coil domain containing 102B [Source:HGNC Symbol;Acc:HGNC:26295]	chr18	68715209	69055189	1	q22.1	35.05	protein_coding	5805
0.0004815	0.0865	143.5	89.17	1.61	8021946	COLEC12	ENSG00000158270	collectin subfamily member 12 [Source:HGNC Symbol;Acc:HGNC:16016]	chr18	316737	500722	-1	p11.32	43.13	protein_coding	7343
0.0027657	0.144	44.13	26.32	1.68	8022283	PIEZO2	ENSG00000154864	piezo type mechanosensitive ion channel component 2 [Source:HGNC Symbol;Acc:HGNC:26270]	chr18	10666483	11149569	-1	p11.21	41.08	protein_coding	15702
0.005678	0.165	72.53	46.97	1.54	8022310	PIEZO2	ENSG00000154864	piezo type mechanosensitive ion channel component 2 [Source:HGNC Symbol;Acc:HGNC:26270]	chr18	10666483	11149569	-1	p11.21	41.08	protein_coding	15702
0.008898	0.18	70.69	104.31	0.68	8023605	PIGN	ENSG00000197563	phosphatidylinositol glycan anchor biosynthesis class N [Source:HGNC Symbol;Acc:HGNC:8967]	chr18	61905255	62187118	-1	q21.33	38.03	protein_coding	19003
0.0007486	0.099	176.58	102.07	1.73	8020110	RAB31	ENSG00000168461	RAB31, member RAS oncogene family [Source:HGNC Symbol;Acc:HGNC:9771]	chr18	9708275	9862551	1	p11.22	43.6	protein_coding	5476
0.00322	0.144	263.77	363.1	0.73	8019877	SMCHD1	ENSG00000101596	structural maintenance of chromosomes flexible hinge domain containing 1 [Source:HGNC Symbol;Acc:HGNC:29090]	chr18	2655726	2805017	1	p11.32	36.81	protein_coding	12447
0.001804	0.132	496.62	295.15	1.68	8021183	SNHG22	ENSG00000267322	small nucleolar RNA host gene 22 [Source:HGNC Symbol;Acc:HGNC:50285]	chr18	49814023	49851059	1	q21.1	43.78	lncRNA	2593
0.000504	0.0865	40.42	71.65	0.56	8023259	SNORD58A	ENSG00000206602	small nucleolar RNA, C/D box 58A [Source:HGNC Symbol;Acc:HGNC:10208]	chr18	49491283	49491347	-1	q21.1	38.46	snoRNA	65
0.003139	0.144	264.04	394.01	0.67	8021984	YES1	ENSG00000176105	YES proto-oncogene 1, Src family tyrosine kinase [Source:HGNC Symbol;Acc:HGNC:12841]	chr18	721588	812546	-1	p11.32	40.01	protein_coding	5100
0.0060915	0.165	130.75	180.14	0.73	8023871	ZADH2	ENSG00000180011	zinc binding alcohol dehydrogenase domain containing 2 [Source:HGNC Symbol;Acc:HGNC:28697]	chr18	75195113	75209139	-1	q22.3	46.3	protein_coding	7943
0.0097224	0.183	45.2	33.09	1.37	8034873	ADGRE2	ENSG00000127507	adhesion G protein-coupled receptor E2 [Source:HGNC Symbol;Acc:HGNC:3337]	chr19	14732392	14778560	-1	p13.12	46.7	protein_coding	8642
0.003527	0.147	233.13	174.07	1.34	8029541	APOC4	ENSG00000267467	apolipoprotein C4 [Source:HGNC Symbol;Acc:HGNC:611]	chr19	44942237	44945496	1	q13.32	54.23	protein_coding	742
0.0005248	0.0868	96.98	65.09	1.49	8029006	AXL	ENSG00000167601	AXL receptor tyrosine kinase [Source:HGNC Symbol;Acc:HGNC:905]	chr19	41219223	41261766	1	q13.2	50.86	protein_coding	5134
0.0082261	0.176	166.9	109.07	1.53	8029489	BCAM	ENSG00000187244	basal cell adhesion molecule (Lutheran blood group) [Source:HGNC Symbol;Acc:HGNC:6722]	chr19	44809071	44821421	1	q13.32	58.92	protein_coding	4997
0.0074235	0.171	781.58	475.58	1.64	8028325	C19orf33	ENSG00000167644	chromosome 19 open reading frame 33 [Source:HGNC Symbol;Acc:HGNC:16668]	chr19	38304164	38305006	1	q13.2	65.48	protein_coding	611
0.0033558	0.145	165.49	81.91	2.02	8024111	CNN2	ENSG00000064666	calponin 2 [Source:HGNC Symbol;Acc:HGNC:2156]	chr19	1026586	1039068	1	p13.3	59.72	protein_coding	3640
2.97e-05	0.0352	96.34	47.87	2.01	8035517	COMP	ENSG00000105664	cartilage oligomeric matrix protein [Source:HGNC Symbol;Acc:HGNC:2227]	chr19	18782773	18791305	-1	p13.11	62.85	protein_coding	3092
0.0086075	0.179	198.08	135.07	1.47	8030064	CYTH2	ENSG00000105443	cytohesin 2 [Source:HGNC Symbol;Acc:HGNC:9502]	chr19	48469208	48482314	1	q13.33	58.18	protein_coding	9333
0.0005634	0.088	43.51	78.64	0.55	8027448	DPY19L3	ENSG00000178904	dpy-19 like C-mannosyltransferase 3 [Source:HGNC Symbol;Acc:HGNC:27120]	chr19	32405543	32485895	1	q13.11	40.45	protein_coding	10781
0.0009745	0.106	477.24	318.17	1.5	8024246	FAM174C	ENSG00000228300	family with sequence similarity 174 member C [Source:HGNC Symbol;Acc:HGNC:26073]	chr19	1275530	1279244	1	p13.3	63.36	protein_coding	2096
0.0061116	0.165	103.57	79.42	1.3	8029693	FOSB	ENSG00000125740	FosB proto-oncogene, AP-1 transcription factor subunit [Source:HGNC Symbol;Acc:HGNC:3797]	chr19	45467995	45475179	1	q13.32	57.58	protein_coding	5553
0.0016362	0.128	81.16	52.14	1.56	8030866	FPR3	ENSG00000187474	formyl peptide receptor 3 [Source:HGNC Symbol;Acc:HGNC:3828]	chr19	51795157	51826190	1	q13.41	42.76	protein_coding	2779
0.0054436	0.165	87.47	55.44	1.58	8023995	FSTL3	ENSG00000070404	follistatin like 3 [Source:HGNC Symbol;Acc:HGNC:3973]	chr19	676392	683392	1	p13.3	64.93	protein_coding	3033
0.0001634	0.0628	195.47	121.58	1.61	8027778	FXYD5	ENSG00000089327	FXYD domain containing ion transport regulator 5 [Source:HGNC Symbol;Acc:HGNC:4029]	chr19	35154730	35169881	1	q13.12	49.86	protein_coding	2991
0.0004847	0.0865	166.36	101.92	1.63	8024485	GADD45B	ENSG00000099860	growth arrest and DNA damage inducible beta [Source:HGNC Symbol;Acc:HGNC:4096]	chr19	2476122	2478259	1	p13.3	60.24	protein_coding	2138
0.0097366	0.183	193.75	138.21	1.4	8026024	GET3	ENSG00000198356	guided entry of tail-anchored proteins factor 3, ATPase [Source:HGNC Symbol;Acc:HGNC:752]	chr19	12737139	12748323	1	p13.13	53.33	protein_coding	1451
0.0035373	0.147	497.82	304.13	1.64	8036710	GMFG	ENSG00000130755	glia maturation factor gamma [Source:HGNC Symbol;Acc:HGNC:4374]	chr19	39328353	39342372	-1	q13.2	51.1	protein_coding	1388
0.0086603	0.179	62.57	45.48	1.38	8024572	GNA15	ENSG00000060558	G protein subunit alpha 15 [Source:HGNC Symbol;Acc:HGNC:4383]	chr19	3136033	3163749	1	p13.3	52.65	protein_coding	2753
0.0078924	0.173	428.72	311.36	1.38	8024194	GPX4	ENSG00000167468	glutathione peroxidase 4 [Source:HGNC Symbol;Acc:HGNC:4556]	chr19	1103926	1106791	1	p13.3	69.47	protein_coding	2019
0.0032224	0.144	66.77	45.34	1.47	8026163	IER2	ENSG00000160888	immediate early response 2 [Source:HGNC Symbol;Acc:HGNC:28871]	chr19	13150411	13154911	1	p13.13	62.36	protein_coding	3079
0.0084177	0.178	196.66	120.17	1.64	8038683	KLK6	ENSG00000167755	kallikrein related peptidase 6 [Source:HGNC Symbol;Acc:HGNC:6367]	chr19	50958631	50969673	-1	q13.41	53.29	protein_coding	1976
0.0075062	0.171	87.83	68.52	1.28	8032996	MICOS13	ENSG00000174917	mitochondrial contact site and cristae organizing system subunit 13 [Source:HGNC Symbol;Acc:HGNC:33702]	chr19	5678421	5680516	-1	p13.3	60.16	protein_coding	1474
0.0024683	0.14	58.42	42.78	1.37	8033605	MYO1F	ENSG00000142347	myosin IF [Source:HGNC Symbol;Acc:HGNC:7600]	chr19	8520778	8577577	-1	p13.2	52.57	protein_coding	8561
8.17e-05	0.0528	297.3	184.62	1.61	8026139	NFIX	ENSG00000008441	nuclear factor I X [Source:HGNC Symbol;Acc:HGNC:7788]	chr19	12995475	13098796	1	p13.13	55.31	protein_coding	6435
0.0014505	0.125	236.25	155.8	1.52	8030133	NUCB1	ENSG00000104805	nucleobindin 1 [Source:HGNC Symbol;Acc:HGNC:8043]	chr19	48900312	48923372	1	q13.33	52.75	protein_coding	3675
0.0005228	0.0868	151.33	100.46	1.51	8030128	PPP1R15A	ENSG00000087074	protein phosphatase 1 regulatory subunit 15A [Source:HGNC Symbol;Acc:HGNC:14375]	chr19	48872421	48876058	1	q13.33	56.79	protein_coding	3065
0.0055709	0.165	86.28	62.12	1.39	8037775	PTGIR	ENSG00000160013	prostaglandin I2 receptor [Source:HGNC Symbol;Acc:HGNC:9602]	chr19	46620468	46625089	-1	q13.32	59.02	protein_coding	3517
0.0019807	0.133	112.81	71.11	1.59	8030383	RCN3	ENSG00000142552	reticulocalbin 3 [Source:HGNC Symbol;Acc:HGNC:21145]	chr19	49528003	49546962	1	q13.33	53.5	protein_coding	1703
0.0065569	0.166	81.76	61.46	1.33	8029580	RELB	ENSG00000104856	RELB proto-oncogene, NF-kB subunit [Source:HGNC Symbol;Acc:HGNC:9956]	chr19	45001449	45038198	1	q13.32	51.24	protein_coding	3016
0.0064751	0.166	91.42	63.68	1.44	8025551	SHFL	ENSG00000130813	shiftless antiviral inhibitor of ribosomal frameshifting [Source:HGNC Symbol;Acc:HGNC:25649]	chr19	10086122	10093252	1	p13.2	56.65	protein_coding	4341
0.0011919	0.113	66.28	48.88	1.36	8024204	STK11	ENSG00000118046	serine/threonine kinase 11 [Source:HGNC Symbol;Acc:HGNC:11389]	chr19	1177558	1228431	1	p13.3	57.49	protein_coding	8811
0.0003892	0.0847	628.45	361.51	1.74	8026513	TPM4	ENSG00000167460	tropomyosin 4 [Source:HGNC Symbol;Acc:HGNC:12013]	chr19	16067021	16103002	1	p13.12	50.92	protein_coding	12375
0.0009432	0.106	143.34	99.41	1.44	8025058	TRIP10	ENSG00000125733	thyroid hormone receptor interactor 10 [Source:HGNC Symbol;Acc:HGNC:12304]	chr19	6737925	6751530	1	p13.3	54.01	protein_coding	3986
0.0038639	0.149	267.67	193.3	1.38	8036224	TYROBP	ENSG00000011600	transmembrane immune signaling adaptor TYROBP [Source:HGNC Symbol;Acc:HGNC:12449]	chr19	35904401	35908295	-1	q13.12	51.45	protein_coding	907
0.0057803	0.165	63.28	103.62	0.61	8027312	ZNF429	ENSG00000197013	zinc finger protein 429 [Source:HGNC Symbol;Acc:HGNC:20817]	chr19	21496682	21556270	1	p12	41.06	protein_coding	7571
0.0090702	0.18	91.57	67.2	1.36	8031617	ZNF444	ENSG00000167685	zinc finger protein 444 [Source:HGNC Symbol;Acc:HGNC:16052]	chr19	56132599	56160893	1	q13.43	54.02	protein_coding	7143
0.0030718	0.144	81.02	121.34	0.67	8036333	ZNF529	ENSG00000186020	zinc finger protein 529 [Source:HGNC Symbol;Acc:HGNC:29328]	chr19	36534774	36605276	-1	q13.12	40.96	protein_coding	8177
0.0021143	0.135	69.7	106.61	0.65	8043687	ANKRD36	ENSG00000135976	ankyrin repeat domain 36 [Source:HGNC Symbol;Acc:HGNC:24079]	chr2	97113153	97264521	1	q11.2	36	protein_coding	11284
0.0080813	0.175	325.22	177.06	1.84	8042439	ANTXR1	ENSG00000169604	ANTXR cell adhesion molecule 1 [Source:HGNC Symbol;Acc:HGNC:21014]	chr2	69013176	69249327	1	p13.3	41.88	protein_coding	17891
0.0029558	0.144	83.29	54.91	1.52	8045563	ARHGAP15	ENSG00000075884	Rho GTPase activating protein 15 [Source:HGNC Symbol;Acc:HGNC:21030]	chr2	143091362	143768352	1	q22.2	36.48	protein_coding	6127
0.0064808	0.166	59.69	89.17	0.67	8045768	ARL6IP6	ENSG00000177917	ADP ribosylation factor like GTPase 6 interacting protein 6 [Source:HGNC Symbol;Acc:HGNC:24048]	chr2	152717893	152762396	1	q23.3	36.98	protein_coding	3868
0.0086388	0.179	349.36	504.26	0.69	8056909	ATF2	ENSG00000115966	activating transcription factor 2 [Source:HGNC Symbol;Acc:HGNC:784]	chr2	175072250	175168382	-1	q31.1	36.05	protein_coding	5751
0.0058813	0.165	265.65	356.18	0.75	8041283	BIRC6	ENSG00000115760	baculoviral IAP repeat containing 6 [Source:HGNC Symbol;Acc:HGNC:13516]	chr2	32357028	32618899	1	p22.3	37.56	protein_coding	17858
0.0053458	0.165	129.26	95.3	1.36	8053417	CAPG	ENSG00000042493	capping actin protein, gelsolin like [Source:HGNC Symbol;Acc:HGNC:1474]	chr2	85394753	85418432	-1	p11.2	51.32	protein_coding	2419
0.0041838	0.154	73.62	114.95	0.64	8044278	CCDC138	ENSG00000163006	coiled-coil domain containing 138 [Source:HGNC Symbol;Acc:HGNC:26531]	chr2	108786757	108885477	1	q13	37.69	protein_coding	5796
0.0066136	0.166	271.1	400.68	0.68	8045381	CCNT2	ENSG00000082258	cyclin T2 [Source:HGNC Symbol;Acc:HGNC:1600]	chr2	134918235	134959342	1	q21.3	37.48	protein_coding	9081
0.0070625	0.17	262.61	385.6	0.68	8054888	CLASP1	ENSG00000074054	cytoplasmic linker associated protein 1 [Source:HGNC Symbol;Acc:HGNC:17088]	chr2	121337776	121649476	-1	q14.3	41.05	protein_coding	10941
0.0002921	0.0763	519.72	171.5	3.03	8046922	COL3A1	ENSG00000168542	collagen type III alpha 1 chain [Source:HGNC Symbol;Acc:HGNC:2201]	chr2	188974373	189012746	1	q32.2	33.79	protein_coding	6758
0.0003612	0.0834	115.67	48.22	2.4	8057620	COL5A2	ENSG00000204262	collagen type V alpha 2 chain [Source:HGNC Symbol;Acc:HGNC:2210]	chr2	189031898	189225312	-1	q32.2	34.93	protein_coding	7319
0.0005584	0.088	706.4	235.46	3	8059905	COL6A3	ENSG00000163359	collagen type VI alpha 3 chain [Source:HGNC Symbol;Acc:HGNC:2213]	chr2	237324003	237414328	-1	q37.3	44.57	protein_coding	21516
0.0037185	0.148	58.05	37.71	1.54	8047692	CTLA4	ENSG00000163599	cytotoxic T-lymphocyte associated protein 4 [Source:HGNC Symbol;Acc:HGNC:2505]	chr2	203867771	203873965	1	q33.2	42.23	protein_coding	2140
0.0015468	0.126	72.9	34.08	2.14	8051583	CYP1B1	ENSG00000138061	cytochrome P450 family 1 subfamily B member 1 [Source:HGNC Symbol;Acc:HGNC:2597]	chr2	38066973	38109902	-1	p22.2	44.41	protein_coding	5985
0.0027776	0.144	101.43	151.58	0.67	8041676	DYNC2LI1	ENSG00000138036	dynein cytoplasmic 2 light intermediate chain 1 [Source:HGNC Symbol;Acc:HGNC:24595]	chr2	43774039	43810010	1	p21	37.57	protein_coding	4618
0.0093157	0.18	139.83	66.83	2.09	8052355	EFEMP1	ENSG00000115380	EGF containing fibulin extracellular matrix protein 1 [Source:HGNC Symbol;Acc:HGNC:3218]	chr2	55865967	55924139	-1	p16.1	37.96	protein_coding	3962
0.0024979	0.14	130.66	93.65	1.4	8041781	EPAS1	ENSG00000116016	endothelial PAS domain protein 1 [Source:HGNC Symbol;Acc:HGNC:3374]	chr2	46293667	46386697	1	p21	46.71	protein_coding	7291
0.0008523	0.103	183.06	259.93	0.7	8044882	EPB41L5	ENSG00000115109	erythrocyte membrane protein band 4.1 like 5 [Source:HGNC Symbol;Acc:HGNC:19819]	chr2	120013077	120179119	1	q14.2	38.49	protein_coding	9209
0.0004661	0.0861	171.47	45.54	3.77	8056257	FAP	ENSG00000078098	fibroblast activation protein alpha [Source:HGNC Symbol;Acc:HGNC:3590]	chr2	162170684	162245151	-1	q24.2	36.7	protein_coding	6968
0.0039512	0.151	2631.95	961.98	2.74	8058765	FN1	ENSG00000115414	fibronectin 1 [Source:HGNC Symbol;Acc:HGNC:3778]	chr2	215360440	215436073	-1	q35	39.39	protein_coding	17216
0.0024178	0.139	143.87	97.1	1.48	8041048	FOSL2	ENSG00000075426	FOS like 2, AP-1 transcription factor subunit [Source:HGNC Symbol;Acc:HGNC:3798]	chr2	28392448	28417317	1	p23.2	51.81	protein_coding	7162
0.0049799	0.163	29.23	49.05	0.6	8046824	FSIP2	ENSG00000188738	fibrous sheath interacting protein 2 [Source:HGNC Symbol;Acc:HGNC:21675]	chr2	185738804	185833290	1	q32.1	34.39	protein_coding	23585
0.0098436	0.183	119.9	165.1	0.73	8053288	GCFC2	ENSG00000005436	GC-rich sequence DNA-binding factor 2 [Source:HGNC Symbol;Acc:HGNC:1317]	chr2	75652000	75710985	-1	p12	36.39	protein_coding	5462
0.0033171	0.145	133.08	185.91	0.72	8040440	GEN1	ENSG00000178295	GEN1 Holliday junction 5' flap endonuclease [Source:HGNC Symbol;Acc:HGNC:26881]	chr2	17753858	17788946	1	p24.2	35.88	protein_coding	11832
0.0069174	0.168	21.41	38.62	0.55	8056327	GRB14	ENSG00000115290	growth factor receptor bound protein 14 [Source:HGNC Symbol;Acc:HGNC:4565]	chr2	164492417	164621482	-1	q24.3	37.01	protein_coding	2987
0.0078665	0.173	133.97	182.88	0.73	8051464	HEATR5B	ENSG00000008869	HEAT repeat containing 5B [Source:HGNC Symbol;Acc:HGNC:29273]	chr2	36968383	37084372	-1	p22.2	38.6	protein_coding	8238
0.0080516	0.175	153.3	110.3	1.39	8043459	IGKC	ENSG00000211592	immunoglobulin kappa constant [Source:HGNC Symbol;Acc:HGNC:5716]	chr2	88857161	88857683	-1	p11.2	53.35	IG_C_gene	523
0.008251	0.176	77.86	48.9	1.59	8161563	IGKC	ENSG00000211592	immunoglobulin kappa constant [Source:HGNC Symbol;Acc:HGNC:5716]	chr2	88857161	88857683	-1	p11.2	53.35	IG_C_gene	523
0.0007562	0.099	29.13	44.19	0.66	8054712	IL1A	ENSG00000115008	interleukin 1 alpha [Source:HGNC Symbol;Acc:HGNC:5991]	chr2	112773925	112784493	-1	q14.1	39.9	protein_coding	2017
0.0003451	0.0832	68.08	38.83	1.75	8048749	KCNE4	ENSG00000152049	potassium voltage-gated channel subfamily E regulatory subunit 4 [Source:HGNC Symbol;Acc:HGNC:6244]	chr2	223051814	223198399	1	q36.1	39.96	protein_coding	4124
0.0050762	0.164	35.11	56.68	0.62	8046160	KLHL41	ENSG00000239474	kelch like family member 41 [Source:HGNC Symbol;Acc:HGNC:16905]	chr2	169509702	169526258	1	q31.1	38.53	protein_coding	2616
0.0034094	0.146	76.36	110.24	0.69	8058614	LANCL1	ENSG00000115365	LanC like 1 [Source:HGNC Symbol;Acc:HGNC:6508]	chr2	210431249	210477652	-1	q34	38.12	protein_coding	5254
0.0049153	0.163	208.15	274.98	0.76	8042283	LGALSL	ENSG00000119862	galectin like [Source:HGNC Symbol;Acc:HGNC:25012]	chr2	64453969	64461381	1	p14	44.8	protein_coding	3933
0.0055534	0.165	205.41	140.68	1.46	8049540	LRRFIP1	ENSG00000124831	LRR binding FLII interacting protein 1 [Source:HGNC Symbol;Acc:HGNC:6702]	chr2	237627587	237813682	1	q37.3	45.52	protein_coding	13218
0.0061828	0.165	174.73	259.03	0.67	8051707	MAP4K3	ENSG00000011566	mitogen-activated protein kinase kinase kinase kinase 3 [Source:HGNC Symbol;Acc:HGNC:6865]	chr2	39249266	39437301	-1	p22.1	36.89	protein_coding	6056
0.0020543	0.135	164.63	234.18	0.7	8041495	NDUFAF7	ENSG00000003509	NADH:ubiquinone oxidoreductase complex assembly factor 7 [Source:HGNC Symbol;Acc:HGNC:28816]	chr2	37231631	37253403	1	p22.2	38.97	protein_coding	3651
0.0019863	0.133	186.93	276.06	0.68	8047372	NDUFB3	ENSG00000119013	NADH:ubiquinone oxidoreductase subunit B3 [Source:HGNC Symbol;Acc:HGNC:7698]	chr2	201071433	201085750	1	q33.1	41.49	protein_coding	1852
0.0098479	0.183	178.4	245.64	0.73	8050255	NOL10	ENSG00000115761	nucleolar protein 10 [Source:HGNC Symbol;Acc:HGNC:25862]	chr2	10570754	10689987	-1	p25.1	40.73	protein_coding	3836
0.0057906	0.165	70.76	119.95	0.59	8046099	NOSTRIN	ENSG00000163072	nitric oxide synthase trafficking [Source:HGNC Symbol;Acc:HGNC:20203]	chr2	168786539	168865514	1	q24.3	41.13	protein_coding	5248
0.0086359	0.179	151.46	220.03	0.69	8046804	NUP35	ENSG00000163002	nucleoporin 35 [Source:HGNC Symbol;Acc:HGNC:29797]	chr2	183117513	183161680	1	q32.1	38.01	protein_coding	4025
0.0011383	0.11	97.7	173.1	0.56	8055645	ORC4	ENSG00000115947	origin recognition complex subunit 4 [Source:HGNC Symbol;Acc:HGNC:8490]	chr2	147930396	148021604	-1	q23.1	36.15	protein_coding	8916
0.0076122	0.172	60.38	76.84	0.79	8044473	POLR1B	ENSG00000125630	RNA polymerase I subunit B [Source:HGNC Symbol;Acc:HGNC:20454]	chr2	112541915	112579818	1	q14.1	42.07	protein_coding	8997
0.0009786	0.106	4193.19	2686.62	1.56	8055151	POTEF	ENSG00000196604	POTE ankyrin domain family member F [Source:HGNC Symbol;Acc:HGNC:33905]	chr2	130073535	130129222	-1	q21.1	38.86	protein_coding	4704
0.0099337	0.183	250.21	351.29	0.71	8051928	PREPL	ENSG00000138078	prolyl endopeptidase like [Source:HGNC Symbol;Acc:HGNC:30228]	chr2	44316281	44361862	-1	p21	37.28	protein_coding	8156
0.0073608	0.171	381.3	536.07	0.71	8043251	PTCD3	ENSG00000132300	pentatricopeptide repeat domain 3 [Source:HGNC Symbol;Acc:HGNC:24717]	chr2	86106223	86142157	1	p11.2	41.2	protein_coding	10123
0.0030928	0.144	94.68	134.7	0.7	8044849	PTPN4	ENSG00000088179	protein tyrosine phosphatase non-receptor type 4 [Source:HGNC Symbol;Acc:HGNC:9656]	chr2	119759922	119984899	1	q14.2	36.97	protein_coding	13276
0.0066879	0.166	70.51	97.18	0.73	8046628	RBM45	ENSG00000155636	RNA binding motif protein 45 [Source:HGNC Symbol;Acc:HGNC:24468]	chr2	178112424	178139011	1	q31.2	36.95	protein_coding	4784
0.0064623	0.166	162.11	89.6	1.81	8040080	RSAD2	ENSG00000134321	radical S-adenosyl methionine domain containing 2 [Source:HGNC Symbol;Acc:HGNC:30908]	chr2	6865557	6898239	1	p25.2	40.27	protein_coding	5659
0.0025313	0.14	118.08	187.6	0.63	8040655	SELENOI	ENSG00000138018	selenoprotein I [Source:HGNC Symbol;Acc:HGNC:29361]	chr2	26308547	26395891	1	p23.3	42.63	protein_coding	8552
0.0028124	0.144	86.44	144.7	0.6	8059712	SNORD82	ENSG00000202400	small nucleolar RNA, C/D box 82 [Source:HGNC Symbol;Acc:HGNC:10240]	chr2	231460371	231460440	-1	q37.1	37.14	snoRNA	70
0.0051838	0.165	50.31	69.26	0.73	8052861	SNRPG	ENSG00000143977	small nuclear ribonucleoprotein polypeptide G [Source:HGNC Symbol;Acc:HGNC:11163]	chr2	70281362	70293740	-1	p13.3	41.07	protein_coding	1764
0.0038234	0.148	62.23	131.94	0.47	8044212	SULT1C2	ENSG00000198203	sulfotransferase family 1C member 2 [Source:HGNC Symbol;Acc:HGNC:11456]	chr2	108288639	108309915	1	q12.3	44.42	protein_coding	8399
0.0014671	0.125	21.91	52.35	0.42	8044225	SULT1C4	ENSG00000198075	sulfotransferase family 1C member 4 [Source:HGNC Symbol;Acc:HGNC:11457]	chr2	108377911	108388989	1	q12.3	40.65	protein_coding	3830
0.0018705	0.133	121.57	179.4	0.68	8040173	TAF1B	ENSG00000115750	TATA-box binding protein associated factor, RNA polymerase I subunit B [Source:HGNC Symbol;Acc:HGNC:11533]	chr2	9843443	9934416	1	p25.1	39.49	protein_coding	3975
0.0068752	0.168	131.16	198.28	0.66	8051226	TRMT61B	ENSG00000171103	tRNA methyltransferase 61B [Source:HGNC Symbol;Acc:HGNC:26070]	chr2	28849821	28870309	-1	p23.2	41.37	protein_coding	2064
0.0093193	0.18	162.64	241.47	0.67	8046213	UBR3	ENSG00000144357	ubiquitin protein ligase E3 component n-recognin 3 [Source:HGNC Symbol;Acc:HGNC:30467]	chr2	169827454	170084131	1	q31.1	36.88	protein_coding	10065
0.0096556	0.183	235.64	166.54	1.41	8056860	WIPF1	ENSG00000115935	WAS/WASL interacting protein family member 1 [Source:HGNC Symbol;Acc:HGNC:12736]	chr2	174559572	174682916	-1	q31.1	41.82	protein_coding	9121
0.0029911	0.144	141.69	202.61	0.7	8060988	BTBD3	ENSG00000132640	BTB domain containing 3 [Source:HGNC Symbol;Acc:HGNC:15854]	chr20	11890723	11926609	1	p12.2	38.63	protein_coding	6228
0.0040625	0.153	114.99	81.43	1.41	8061416	CST7	ENSG00000077984	cystatin F [Source:HGNC Symbol;Acc:HGNC:2479]	chr20	24949269	24959928	1	p11.21	56.39	protein_coding	891
0.0031606	0.144	137.83	97.05	1.42	8067279	CTSZ	ENSG00000101160	cathepsin Z [Source:HGNC Symbol;Acc:HGNC:2547]	chr20	58985686	59008238	-1	q13.32	53.07	protein_coding	19384
0.0058933	0.165	133.2	103.01	1.29	8067040	NFATC2	ENSG00000101096	nuclear factor of activated T cells 2 [Source:HGNC Symbol;Acc:HGNC:7776]	chr20	51386957	51562831	-1	q13.2	47.94	protein_coding	8286
0.0083929	0.178	131.2	198.76	0.66	8065762	PIGU	ENSG00000101464	phosphatidylinositol glycan anchor biosynthesis class U [Source:HGNC Symbol;Acc:HGNC:15791]	chr20	34560542	34698790	-1	q11.22	44.54	protein_coding	2707
0.000463	0.0861	81.63	44.13	1.85	8066925	PTGIS	ENSG00000124212	prostaglandin I2 synthase [Source:HGNC Symbol;Acc:HGNC:9603]	chr20	49503874	49568137	-1	q13.13	46.16	protein_coding	5570
0.0001408	0.0622	62.63	40.7	1.54	8064790	RASSF2	ENSG00000101265	Ras association domain family member 2 [Source:HGNC Symbol;Acc:HGNC:9883]	chr20	4780023	4823608	-1	p13	49.01	protein_coding	5722
0.0076985	0.172	111.57	84.26	1.32	8062427	VSTM2L	ENSG00000132821	V-set and transmembrane domain containing 2 like [Source:HGNC Symbol;Acc:HGNC:16096]	chr20	37903111	37945350	1	q11.23	54.01	protein_coding	1952
0.0084401	0.178	54.53	69.3	0.79	8067969	CHODL	ENSG00000154645	chondrolectin [Source:HGNC Symbol;Acc:HGNC:17807]	chr21	17901263	18267373	1	q21.1	37.04	protein_coding	3093
0.0035123	0.147	212.02	126.39	1.68	8069269	COL6A1	ENSG00000142156	collagen type VI alpha 1 chain [Source:HGNC Symbol;Acc:HGNC:2211]	chr21	45981770	46005050	1	q22.3	64.66	protein_coding	5536
0.0006278	0.093	222.77	145.64	1.53	8070194	RUNX1	ENSG00000159216	RUNX family transcription factor 1 [Source:HGNC Symbol;Acc:HGNC:10471]	chr21	34787801	36004667	-1	q22.12	41.54	protein_coding	15574
0.0064695	0.166	115.06	80.48	1.43	8073605	BIK	ENSG00000100290	BCL2 interacting killer [Source:HGNC Symbol;Acc:HGNC:1051]	chr22	43110750	43129712	1	q13.2	54.79	protein_coding	951
0.0037508	0.148	176.66	111.02	1.59	8073775	FBLN1	ENSG00000077942	fibulin 1 [Source:HGNC Symbol;Acc:HGNC:3600]	chr22	45502238	45601135	1	q13.31	53.13	protein_coding	7285
0.0036341	0.147	236.01	369.5	0.64	8111455	GUSBP11	ENSG00000228315	GUSB pseudogene 11 [Source:HGNC Symbol;Acc:HGNC:42325]	chr22	23638487	23717356	-1	q11.23	50.35	lncRNA	7764
0.0009953	0.106	104.4	75.64	1.38	8076690	KIAA0930	ENSG00000100364	KIAA0930 [Source:HGNC Symbol;Acc:HGNC:1314]	chr22	45192244	45240894	-1	q13.31	54.64	protein_coding	8238
0.0051773	0.165	1173.31	587.33	2	8072876	LGALS1	ENSG00000100097	galectin 1 [Source:HGNC Symbol;Acc:HGNC:6561]	chr22	37675636	37679802	1	q13.1	56.68	protein_coding	1067
0.0018401	0.133	130.69	88.33	1.48	8071758	MMP11	ENSG00000099953	matrix metallopeptidase 11 [Source:HGNC Symbol;Acc:HGNC:7157]	chr22	23768226	23784316	1	q11.23	57.83	protein_coding	5149
0.00041	0.0857	414.51	234.7	1.77	8075728	MYH9	ENSG00000100345	myosin heavy chain 9 [Source:HGNC Symbol;Acc:HGNC:7579]	chr22	36281280	36387967	-1	q12.3	52.36	protein_coding	8909
0.000152	0.0628	79.84	46.68	1.71	8076455	RRP7A	ENSG00000189306	ribosomal RNA processing 7 homolog A [Source:HGNC Symbol;Acc:HGNC:24286]	chr22	42508344	42519796	-1	q13.2	57.5	protein_coding	5700
9.73e-05	0.0537	419.05	176.8	2.37	8072626	TIMP3	ENSG00000100234	TIMP metallopeptidase inhibitor 3 [Source:HGNC Symbol;Acc:HGNC:11822]	chr22	32801705	32863041	1	q12.3	47.17	protein_coding	4597
0.0018624	0.133	1169.53	405.58	2.88	8075635	TIMP3	ENSG00000100234	TIMP metallopeptidase inhibitor 3 [Source:HGNC Symbol;Acc:HGNC:11822]	chr22	32801705	32863041	1	q12.3	47.17	protein_coding	4597
0.0036154	0.147	195.3	272.41	0.72	7930870	TOMM22	ENSG00000100216	translocase of outer mitochondrial membrane 22 [Source:HGNC Symbol;Acc:HGNC:18002]	chr22	38681957	38685421	1	q13.1	48.69	protein_coding	2182
0.00904	0.18	309.86	419.21	0.74	8092933	ACAP2	ENSG00000114331	ArfGAP with coiled-coil, ankyrin repeat and PH domains 2 [Source:HGNC Symbol;Acc:HGNC:16469]	chr3	195274745	195443044	-1	q29	38.17	protein_coding	11096
0.002344	0.139	44.01	25.5	1.73	8084710	ADIPOQ	ENSG00000181092	adiponectin, C1Q and collagen domain containing [Source:HGNC Symbol;Acc:HGNC:13633]	chr3	186842704	186858463	1	q27.3	43.85	protein_coding	4599
0.0017582	0.13	462.54	659.09	0.7	8092849	ATP13A3	ENSG00000133657	ATPase 13A3 [Source:HGNC Symbol;Acc:HGNC:24113]	chr3	194402672	194498364	-1	q29	38.74	protein_coding	13254
0.0025148	0.14	237.34	142.25	1.67	8077441	BHLHE40	ENSG00000134107	basic helix-loop-helix family member e40 [Source:HGNC Symbol;Acc:HGNC:1046]	chr3	4979437	4985323	1	p26.1	47.72	protein_coding	3516
0.0021841	0.136	29.72	50.07	0.59	8091629	C3orf33	ENSG00000174928	chromosome 3 open reading frame 33 [Source:HGNC Symbol;Acc:HGNC:26434]	chr3	155762617	155806278	-1	q25.31	40.69	protein_coding	2061
0.0053076	0.165	725.08	268.52	2.7	8089544	CCDC80	ENSG00000091986	coiled-coil domain containing 80 [Source:HGNC Symbol;Acc:HGNC:30649]	chr3	112596797	112649530	-1	q13.2	40.28	protein_coding	13068
0.0090666	0.18	35.89	28.01	1.28	8081564	CD96	ENSG00000153283	CD96 molecule [Source:HGNC Symbol;Acc:HGNC:16892]	chr3	111292719	111665750	1	q13.13	38.02	protein_coding	5621
0.0089302	0.18	226.5	124.15	1.82	8086517	CDCP1	ENSG00000163814	CUB domain containing protein 1 [Source:HGNC Symbol;Acc:HGNC:24357]	chr3	45082277	45146422	-1	p21.31	45.19	protein_coding	6508
0.0047031	0.16	120.98	90.22	1.34	8083887	CLDN11	ENSG00000013297	claudin 11 [Source:HGNC Symbol;Acc:HGNC:8514]	chr3	170418868	170454733	1	q26.2	43.14	protein_coding	4321
1.33e-05	0.0243	69.55	28.71	2.42	8081235	COL8A1	ENSG00000144810	collagen type VIII alpha 1 chain [Source:HGNC Symbol;Acc:HGNC:2215]	chr3	99638475	99799226	1	q12.1	38.48	protein_coding	9408
0.0071792	0.171	60.24	89.99	0.67	8092523	EHHADH	ENSG00000113790	enoyl-CoA hydratase and 3-hydroxyacyl CoA dehydrogenase [Source:HGNC Symbol;Acc:HGNC:3247]	chr3	185190624	185281990	-1	q27.2	39.78	protein_coding	4651
0.002111	0.135	216.76	296.11	0.73	8083333	EIF2A	ENSG00000144895	eukaryotic translation initiation factor 2A [Source:HGNC Symbol;Acc:HGNC:3254]	chr3	150546678	150586016	1	q25.1	37.63	protein_coding	5905
0.0023987	0.139	287.07	463.86	0.62	8091354	HLTF	ENSG00000071794	helicase like transcription factor [Source:HGNC Symbol;Acc:HGNC:11099]	chr3	149030127	149086554	-1	q24	35.95	protein_coding	6024
0.001241	0.116	122.75	86.03	1.43	8092839	LRRC15	ENSG00000172061	leucine rich repeat containing 15 [Source:HGNC Symbol;Acc:HGNC:20818]	chr3	194355249	194369743	-1	q29	52.69	protein_coding	5938
0.0058208	0.165	95.06	133.73	0.71	8084838	PLAAT1	ENSG00000127252	phospholipase A and acyltransferase 1 [Source:HGNC Symbol;Acc:HGNC:14922]	chr3	193241128	193277738	1	q29	37.84	protein_coding	1166
0.0035085	0.147	67.09	102.91	0.65	8082012	SLC15A2	ENSG00000163406	solute carrier family 15 member 2 [Source:HGNC Symbol;Acc:HGNC:10921]	chr3	121894401	121944188	1	q13.33	39.94	protein_coding	5984
0.0019615	0.133	241.53	372.95	0.65	8083063	SLC25A36	ENSG00000114120	solute carrier family 25 member 36 [Source:HGNC Symbol;Acc:HGNC:25554]	chr3	140941830	140980995	1	q23	35.48	protein_coding	10339
0.0082782	0.176	197.47	276.85	0.71	8089627	SPICE1	ENSG00000163611	spindle and centriole associated protein 1 [Source:HGNC Symbol;Acc:HGNC:25083]	chr3	113442718	113515187	-1	q13.2	38.02	protein_coding	7941
0.0015133	0.125	316.67	483.79	0.65	8091103	TFDP2	ENSG00000114126	transcription factor Dp-2 [Source:HGNC Symbol;Acc:HGNC:11751]	chr3	141944428	142149544	-1	q23	39.89	protein_coding	11897
0.0023822	0.139	179.4	240.82	0.74	8083569	TIPARP	ENSG00000163659	TCDD inducible poly(ADP-ribose) polymerase [Source:HGNC Symbol;Acc:HGNC:23696]	chr3	156673235	156706770	1	q25.31	38.27	protein_coding	4800
0.0003703	0.0836	179.77	109.83	1.64	8086125	TRANK1	ENSG00000168016	tetratricopeptide repeat and ankyrin repeat containing 1 [Source:HGNC Symbol;Acc:HGNC:29011]	chr3	36826819	36945057	-1	p22.2	43.18	protein_coding	12134
0.007527	0.171	48.88	67.15	0.73	8090395	TXNRD3	ENSG00000197763	thioredoxin reductase 3 [Source:HGNC Symbol;Acc:HGNC:20667]	chr3	126571779	126655124	-1	q21.3	40.49	protein_coding	3780
0.0006439	0.0933	69.86	46.05	1.52	8085475	WNT7A	ENSG00000154764	Wnt family member 7A [Source:HGNC Symbol;Acc:HGNC:12786]	chr3	13816258	13880071	-1	p25.1	51.83	protein_coding	4529
0.0047306	0.16	80.99	112.08	0.72	8084035	ZNF639	ENSG00000121864	zinc finger protein 639 [Source:HGNC Symbol;Acc:HGNC:30950]	chr3	179323031	179338583	1	q26.33	41.23	protein_coding	6819
0.0041356	0.153	55.08	81.77	0.67	8098752	ABCA11P	ENSG00000251595	ATP binding cassette subfamily A member 11, pseudogene [Source:HGNC Symbol;Acc:HGNC:31]	chr4	425435	474129	-1	p16.3	39.69	transcribed_processed_pseudogene	2790
0.0088572	0.18	128.14	78.91	1.62	8103951	ACSL1	ENSG00000151726	acyl-CoA synthetase long chain family member 1 [Source:HGNC Symbol;Acc:HGNC:3569]	chr4	184755595	184826818	-1	q35.1	44.71	protein_coding	6134
0.0072079	0.171	45.71	61.68	0.74	8100145	COMMD8	ENSG00000169019	COMM domain containing 8 [Source:HGNC Symbol;Acc:HGNC:26036]	chr4	47450787	47463702	-1	p12	36.36	protein_coding	1758
0.0028647	0.144	1141.67	1471.22	0.78	8099649	DHX15	ENSG00000109606	DEAH-box helicase 15 [Source:HGNC Symbol;Acc:HGNC:2738]	chr4	24517441	24584554	-1	p15.2	37.26	protein_coding	8166
0.0099378	0.183	526.52	693.42	0.76	8095048	FIP1L1	ENSG00000145216	factor interacting with PAPOLA and CPSF1 [Source:HGNC Symbol;Acc:HGNC:19124]	chr4	53377641	53460862	1	q12	35.71	protein_coding	5639
0.0023591	0.139	56.75	74.54	0.76	8095907	FRAS1	ENSG00000138759	Fraser extracellular matrix complex subunit 1 [Source:HGNC Symbol;Acc:HGNC:19185]	chr4	78057323	78544269	1	q21.21	39.77	protein_coding	20323
0.0049738	0.163	125.61	82.62	1.52	8096281	IBSP	ENSG00000029559	integrin binding sialoprotein [Source:HGNC Symbol;Acc:HGNC:5341]	chr4	87799554	87812435	1	q22.1	36.14	protein_coding	1573
0.0030393	0.144	78.73	127.14	0.62	8094719	N4BP2	ENSG00000078177	NEDD4 binding protein 2 [Source:HGNC Symbol;Acc:HGNC:29851]	chr4	40056850	40158252	1	p14	40.51	protein_coding	9811
0.0015974	0.126	153.66	217.85	0.71	8100179	NFXL1	ENSG00000170448	nuclear transcription factor, X-box binding like 1 [Source:HGNC Symbol;Acc:HGNC:18726]	chr4	47847233	47914667	-1	p12	35.55	protein_coding	4494
0.0010514	0.108	46.88	68.55	0.68	8094759	NSUN7	ENSG00000179299	NOP2/Sun RNA methyltransferase family member 7 [Source:HGNC Symbol;Acc:HGNC:25857]	chr4	40749925	40811184	1	p14	39.47	protein_coding	5899
0.003065	0.144	154.37	209.05	0.74	8094342	PACRGL	ENSG00000163138	parkin coregulated like [Source:HGNC Symbol;Acc:HGNC:28442]	chr4	20696282	20752907	1	p15.31	38.27	protein_coding	8232
0.0052926	0.165	82.24	41.41	1.99	8104022	PDLIM3	ENSG00000154553	PDZ and LIM domain 3 [Source:HGNC Symbol;Acc:HGNC:20767]	chr4	185500660	185535507	-1	q35.1	39.95	protein_coding	9012
0.0001344	0.0616	201.11	41.46	4.85	8103254	SFRP2	ENSG00000145423	secreted frizzled related protein 2 [Source:HGNC Symbol;Acc:HGNC:10777]	chr4	153780591	153789083	-1	q31.3	42.87	protein_coding	1996
0.0056586	0.165	257.7	347.78	0.74	8094456	SMIM20	ENSG00000250317	small integral membrane protein 20 [Source:HGNC Symbol;Acc:HGNC:37260]	chr4	25861830	25929874	1	p15.2	45.19	protein_coding	1612
6.09e-05	0.0498	88.73	38.61	2.3	8098441	TENM3	ENSG00000218336	teneurin transmembrane protein 3 [Source:HGNC Symbol;Acc:HGNC:29944]	chr4	182143987	182803024	1	q34.3	38.92	protein_coding	12010
0.0030994	0.144	34.65	49.81	0.7	8096411	TIGD2	ENSG00000180346	tigger transposable element derived 2 [Source:HGNC Symbol;Acc:HGNC:18333]	chr4	89111533	89114901	1	q22.1	42.86	protein_coding	3186
0.0098783	0.183	128.14	182.68	0.7	8093336	ZNF141	ENSG00000131127	zinc finger protein 141 [Source:HGNC Symbol;Acc:HGNC:12926]	chr4	337814	384868	1	p16.3	40.31	protein_coding	12944
0.0081074	0.175	74.03	48.9	1.51	8111387	ADAMTS12	ENSG00000151388	ADAM metallopeptidase with thrombospondin type 1 motif 12 [Source:HGNC Symbol;Acc:HGNC:14605]	chr5	33523535	33892019	-1	p13.2	40.42	protein_coding	9605
0.0081113	0.175	31.72	41.36	0.77	8106962	ARSK	ENSG00000164291	arylsulfatase family member K [Source:HGNC Symbol;Acc:HGNC:25239]	chr5	95555101	95605102	1	q15	36.73	protein_coding	4325
0.0047169	0.16	176.11	124.34	1.42	8104601	BASP1	ENSG00000176788	brain abundant membrane attached signal protein 1 [Source:HGNC Symbol;Acc:HGNC:957]	chr5	17065598	17276843	1	p15.1	43.15	protein_coding	2146
0.0077105	0.172	163.62	114.72	1.43	8114612	CD14	ENSG00000170458	CD14 molecule [Source:HGNC Symbol;Acc:HGNC:1628]	chr5	140631728	140633701	-1	q31.3	58.26	protein_coding	1648
0.0030452	0.144	218.6	146.05	1.5	8115918	CLTB	ENSG00000175416	clathrin light chain B [Source:HGNC Symbol;Acc:HGNC:2091]	chr5	176392501	176416539	-1	q35.2	53.08	protein_coding	1963
0.0042731	0.155	83.14	60.93	1.36	8115076	CSF1R	ENSG00000182578	colony stimulating factor 1 receptor [Source:HGNC Symbol;Acc:HGNC:2433]	chr5	150053291	150113372	-1	q32	48.1	protein_coding	5151
0.0090158	0.18	72.2	40.69	1.77	8114249	CXCL14	ENSG00000145824	C-X-C motif chemokine ligand 14 [Source:HGNC Symbol;Acc:HGNC:10640]	chr5	135570679	135579279	-1	q31.1	52.05	protein_coding	1975
0.006705	0.166	162.59	229.99	0.71	8112081	DHX29	ENSG00000067248	DExH-box helicase 29 [Source:HGNC Symbol;Acc:HGNC:15815]	chr5	55256055	55307694	-1	q11.2	37.07	protein_coding	4896
0.0012816	0.117	78.59	52.83	1.49	8109843	DOCK2	ENSG00000134516	dedicator of cytokinesis 2 [Source:HGNC Symbol;Acc:HGNC:2988]	chr5	169637268	170083382	1	q35.1	43.39	protein_coding	13189
0.0029508	0.144	171.21	99.61	1.72	8114920	DPYSL3	ENSG00000113657	dihydropyrimidinase like 3 [Source:HGNC Symbol;Acc:HGNC:3015]	chr5	147390808	147510068	-1	q32	41.44	protein_coding	7179
0.0050145	0.163	102.33	164.87	0.62	8112274	ELOVL7	ENSG00000164181	ELOVL fatty acid elongase 7 [Source:HGNC Symbol;Acc:HGNC:26292]	chr5	60751791	60844274	-1	q12.1	39.18	protein_coding	4461
0.0025064	0.14	183.72	113.78	1.61	8111739	FYB1	ENSG00000082074	FYN binding protein 1 [Source:HGNC Symbol;Acc:HGNC:4036]	chr5	39105252	39274528	-1	p13.1	37.96	protein_coding	8823
0.0074216	0.171	52.93	33.34	1.59	8116418	GFPT2	ENSG00000131459	glutamine-fructose-6-phosphate transaminase 2 [Source:HGNC Symbol;Acc:HGNC:4242]	chr5	180300698	180353336	-1	q35.3	51.24	protein_coding	4721
0.0008807	0.104	147.95	100.14	1.48	8109333	GPX3	ENSG00000211445	glutathione peroxidase 3 [Source:HGNC Symbol;Acc:HGNC:4555]	chr5	151020438	151028992	1	q33.1	53.03	protein_coding	3162
0.0009698	0.106	20.9	14.25	1.47	8105331	GZMK	ENSG00000113088	granzyme K [Source:HGNC Symbol;Acc:HGNC:4711]	chr5	55024256	55034570	1	q11.2	40.28	protein_coding	1567
0.0015112	0.125	49.94	24.98	2	8104901	IL7R	ENSG00000168685	interleukin 7 receptor [Source:HGNC Symbol;Acc:HGNC:6024]	chr5	35852695	35879603	1	p13.2	39.18	protein_coding	6020
0.0045247	0.159	89.4	135.33	0.66	8105545	IPO11	ENSG00000086200	importin 11 [Source:HGNC Symbol;Acc:HGNC:20628]	chr5	62403972	62628582	1	q12.1	38.3	protein_coding	7540
0.0036212	0.147	77.66	49.93	1.56	8114010	IRF1	ENSG00000125347	interferon regulatory factor 1 [Source:HGNC Symbol;Acc:HGNC:6116]	chr5	132440440	132508719	-1	q31.1	49.64	protein_coding	12265
0.0010004	0.106	150.9	90.23	1.67	8115734	LCP2	ENSG00000043462	lymphocyte cytosolic protein 2 [Source:HGNC Symbol;Acc:HGNC:6529]	chr5	170246233	170297815	-1	q35.1	44.62	protein_coding	6823
0.003534	0.147	177.29	333.77	0.53	8111677	LIFR	ENSG00000113594	LIF receptor subunit alpha [Source:HGNC Symbol;Acc:HGNC:6597]	chr5	38474668	38608354	-1	p13.1	39.44	protein_coding	12159
0.0005113	0.0865	83.99	35.48	2.37	8113709	LOX	ENSG00000113083	lysyl oxidase [Source:HGNC Symbol;Acc:HGNC:6664]	chr5	122063195	122078413	-1	q23.1	38.02	protein_coding	5596
0.0015282	0.126	94.29	140.13	0.67	8107859	LYRM7	ENSG00000186687	LYR motif containing 7 [Source:HGNC Symbol;Acc:HGNC:28072]	chr5	131170944	131205428	1	q23.3	38.04	protein_coding	6219
0.0046861	0.16	141.34	205.02	0.69	8110886	MED10	ENSG00000133398	mediator complex subunit 10 [Source:HGNC Symbol;Acc:HGNC:28760]	chr5	6371874	6378571	-1	p15.31	45	protein_coding	1864
0.0024466	0.14	101.32	74.96	1.35	8115099	PDGFRB	ENSG00000113721	platelet derived growth factor receptor beta [Source:HGNC Symbol;Acc:HGNC:8804]	chr5	150113839	150155872	-1	q32	54.34	protein_coding	7135
0.0053897	0.165	177.31	118.58	1.5	8116070	PDLIM7	ENSG00000196923	PDZ and LIM domain 7 [Source:HGNC Symbol;Acc:HGNC:22958]	chr5	177483394	177497606	-1	q35.3	60.73	protein_coding	4407
0.001777	0.13	23.14	43.53	0.53	8177554	PMCHL2	ENSG00000290836	pro-melanin concentrating hormone like 2 (pseudogene)	CHR5	71375786	71385993	1			lncRNA
0.0037783	0.148	49.72	71.86	0.69	8109938	RANBP17	ENSG00000204764	RAN binding protein 17 [Source:HGNC Symbol;Acc:HGNC:14428]	chr5	170861870	171300015	1	q35.1	37.4	protein_coding	10965
0.0049858	0.163	12.16	18.89	0.64	8114152	SKP1	ENSG00000113558	S-phase kinase associated protein 1 [Source:HGNC Symbol;Acc:HGNC:10899]	chr5	134148935	134176964	-1	q31.1	41.17	protein_coding	12697
0.0062085	0.165	2036.34	1050.19	1.94	8115327	SPARC	ENSG00000113140	secreted protein acidic and cysteine rich [Source:HGNC Symbol;Acc:HGNC:11219]	chr5	151661096	151686975	-1	q33.1	47.82	protein_coding	4641
0.0002354	0.0758	36.52	58.2	0.63	8112337	SREK1IP1	ENSG00000153006	SREK1 interacting protein 1 [Source:HGNC Symbol;Acc:HGNC:26716]	chr5	64718148	64768691	-1	q12.3	36.21	protein_coding	8460
0.0096	0.183	172.52	237.29	0.73	8112940	SSBP2	ENSG00000145687	single stranded DNA binding protein 2 [Source:HGNC Symbol;Acc:HGNC:15831]	chr5	81413021	81751797	-1	q14.1	35.97	protein_coding	11284
0.0066911	0.166	106.45	71.64	1.49	8115783	STK10	ENSG00000072786	serine/threonine kinase 10 [Source:HGNC Symbol;Acc:HGNC:11388]	chr5	172042079	172188224	-1	q35.1	48.99	protein_coding	8915
0.0004919	0.0865	169.75	97.26	1.75	8108217	TGFBI	ENSG00000120708	transforming growth factor beta induced [Source:HGNC Symbol;Acc:HGNC:11771]	chr5	136028988	136063818	1	q31.1	48.91	protein_coding	7717
0.0072809	0.171	104.14	155.27	0.67	8104234	TRIP13	ENSG00000071539	thyroid hormone receptor interactor 13 [Source:HGNC Symbol;Acc:HGNC:12307]	chr5	892884	919357	1	p15.33	50.22	protein_coding	3319
0.0039975	0.151	502.76	141.02	3.57	8106743	VCAN	ENSG00000038427	versican [Source:HGNC Symbol;Acc:HGNC:2464]	chr5	83471618	83582303	1	q14.2	37.18	protein_coding	14678
0.0054259	0.165	92.21	135.42	0.68	8120860	BCKDHB	ENSG00000083123	branched chain keto acid dehydrogenase E1 subunit beta [Source:HGNC Symbol;Acc:HGNC:987]	chr6	80106647	80346270	1	q14.1	36.82	protein_coding	4071
0.002128	0.135	161.88	95.03	1.7	8178442	CDSN	ENSG00000204539	corneodesmosin [Source:HGNC Symbol;Acc:HGNC:1802]	chr6	31115087	31120446	-1	p21.33	52.48	protein_coding	2555
0.001164	0.112	115.46	167.95	0.69	8123342	CEP43	ENSG00000213066	centrosomal protein 43 [Source:HGNC Symbol;Acc:HGNC:17012]	chr6	166999317	167094789	1	q27	40.97	protein_coding	15886
0.0095464	0.183	74.15	33.33	2.22	8118345	CFB	ENSG00000243649	complement factor B [Source:HGNC Symbol;Acc:HGNC:1037]	chr6	31945650	31952084	1	p21.33	52.62	protein_coding	4731
0.0014586	0.125	36.68	58.46	0.63	8122966	CLDN20	ENSG00000171217	claudin 20 [Source:HGNC Symbol;Acc:HGNC:2042]	chr6	155264013	155276548	1	q25.3	40.37	protein_coding	1209
0.0062834	0.165	113.25	79.79	1.42	8129082	COL10A1	ENSG00000123500	collagen type X alpha 1 chain [Source:HGNC Symbol;Acc:HGNC:2185]	chr6	116118909	116158747	-1	q22.1	35.46	protein_coding	3830
0.005144	0.165	38.21	49.55	0.77	8128383	COQ3	ENSG00000132423	coenzyme Q3, methyltransferase [Source:HGNC Symbol;Acc:HGNC:18175]	chr6	99369401	99394195	-1	q16.2	39.36	protein_coding	1448
0.0030667	0.144	157.08	94.21	1.67	8121685	DCBLD1	ENSG00000164465	discoidin, CUB and LCCL domain containing 1 [Source:HGNC Symbol;Acc:HGNC:21479]	chr6	117453817	117569858	1	q22.1	39.51	protein_coding	6819
0.0065569	0.166	48.51	80.73	0.6	8126750	ENPP5	ENSG00000112796	ectonucleotide pyrophosphatase/phosphodiesterase family member 5 [Source:HGNC Symbol;Acc:HGNC:13717]	chr6	46159185	46170980	-1	p21.1	38.41	protein_coding	4275
1.43e-05	0.0243	97.47	46.86	2.08	8123104	FNDC1	ENSG00000164694	fibronectin type III domain containing 1 [Source:HGNC Symbol;Acc:HGNC:21184]	chr6	159169400	159272108	1	q25.3	43.39	protein_coding	6850
0.0092859	0.18	62.31	140.73	0.44	8127072	GSTA1	ENSG00000243955	glutathione S-transferase alpha 1 [Source:HGNC Symbol;Acc:HGNC:4626]	chr6	52791371	52803860	-1	p12.2	40.45	protein_coding	1262
0.0017657	0.13	207.35	340.87	0.61	8117382	H2BC5	ENSG00000158373	H2B clustered histone 5 [Source:HGNC Symbol;Acc:HGNC:4747]	chr6	26158146	26171349	1	p22.2	42.24	protein_coding	871
0.0081143	0.175	432.22	610.69	0.71	8124448	H4C8	ENSG00000158406	H4 clustered histone 8 [Source:HGNC Symbol;Acc:HGNC:4788]	chr6	26277609	26285638	-1	p22.2	41.76	protein_coding	2163
0.006187	0.165	182.83	119.15	1.53	8179019	HLA-F	ENSG00000204642	major histocompatibility complex, class I, F [Source:HGNC Symbol;Acc:HGNC:4963]	chr6	29722775	29738528	1	p22.1	45.02	protein_coding	4315
0.0020243	0.134	86.48	58.25	1.48	8179034	HLA-F	ENSG00000204642	major histocompatibility complex, class I, F [Source:HGNC Symbol;Acc:HGNC:4963]	chr6	29722775	29738528	1	p22.1	45.02	protein_coding	4315
0.0007763	0.099	383.88	228.93	1.68	8117800	HLA-F	ENSG00000204642	major histocompatibility complex, class I, F [Source:HGNC Symbol;Acc:HGNC:4963]	chr6	29722775	29738528	1	p22.1	45.02	protein_coding	4315
0.0027108	0.144	2484.38	1700.24	1.46	8179041	HLA-F	ENSG00000204642	major histocompatibility complex, class I, F [Source:HGNC Symbol;Acc:HGNC:4963]	chr6	29722775	29738528	1	p22.1	45.02	protein_coding	4315
0.0061234	0.165	272.57	175.12	1.56	8179103	HLA-F	ENSG00000204642	major histocompatibility complex, class I, F [Source:HGNC Symbol;Acc:HGNC:4963]	chr6	29722775	29738528	1	p22.1	45.02	protein_coding	4315
0.0060908	0.165	68.25	47.51	1.44	8118669	KIFC1	ENSG00000237649	kinesin family member C1 [Source:HGNC Symbol;Acc:HGNC:6389]	chr6	33391823	33409896	1	p21.32	47.44	protein_coding	3030
0.0091974	0.18	16.02	20.14	0.8	8127380	LGSN	ENSG00000146166	lengsin, lens protein with glutamine synthetase domain [Source:HGNC Symbol;Acc:HGNC:21016]	chr6	63275951	63319983	-1	q12	36.89	protein_coding	5829
0.0041856	0.154	248.95	340.72	0.73	8121525	MFSD4B	ENSG00000173214	major facilitator superfamily domain containing 4B [Source:HGNC Symbol;Acc:HGNC:21053]	chr6	111259327	111445354	1	q21	37.91	protein_coding	18075
0.0098809	0.183	87.57	58.57	1.5	8117748	MOG	ENSG00000204655	myelin oligodendrocyte glycoprotein [Source:HGNC Symbol;Acc:HGNC:7197]	chr6	29657002	29672372	1	p22.1	45.68	protein_coding	3175
0.0004596	0.0861	77.86	35.17	2.21	8129573	MOXD1	ENSG00000079931	monooxygenase DBH like 1 [Source:HGNC Symbol;Acc:HGNC:21063]	chr6	132296055	132401475	-1	q23.2	37.05	protein_coding	5223
0.0031592	0.144	169.25	229.12	0.74	8117194	MRS2	ENSG00000124532	magnesium transporter MRS2 [Source:HGNC Symbol;Acc:HGNC:13785]	chr6	24402908	24426194	1	p22.3	39.3	protein_coding	5133
0.0068206	0.168	220.22	294.21	0.75	8126259	OARD1	ENSG00000124596	O-acyl-ADP-ribose deacylase 1 [Source:HGNC Symbol;Acc:HGNC:21257]	chr6	41033627	41097787	-1	p21.1	44.19	protein_coding	6529
0.0019506	0.133	90.32	66.17	1.36	8124798	PPP1R18	ENSG00000146112	protein phosphatase 1 regulatory subunit 18 [Source:HGNC Symbol;Acc:HGNC:29413]	chr6	30676389	30687895	-1	p21.33	56.1	protein_coding	4599
0.0031823	0.144	196.36	115.6	1.7	8121257	PRDM1	ENSG00000057657	PR/SET domain 1 [Source:HGNC Symbol;Acc:HGNC:9346]	chr6	105993463	106109939	1	q21	40.37	protein_coding	6750
0.0014611	0.125	142.41	246.48	0.58	8062211	RPF2	ENSG00000197498	ribosome production factor 2 homolog [Source:HGNC Symbol;Acc:HGNC:20870]	chr6	110982015	111028263	1	q21	42.58	protein_coding	3922
0.0045688	0.16	147.66	99.32	1.49	8120043	RUNX2	ENSG00000124813	RUNX family transcription factor 2 [Source:HGNC Symbol;Acc:HGNC:10472]	chr6	45328157	45664349	1	p21.1	40.23	protein_coding	8192
0.0028078	0.144	148.9	232.72	0.64	8120833	SH3BGRL2	ENSG00000198478	SH3 domain binding glutamate rich protein like 2 [Source:HGNC Symbol;Acc:HGNC:15567]	chr6	79631329	79703655	1	q14.1	38.81	protein_coding	4603
0.0061113	0.165	199.35	313.9	0.64	8121002	SMIM8	ENSG00000111850	small integral membrane protein 8 [Source:HGNC Symbol;Acc:HGNC:21401]	chr6	87322583	87399749	1	q15	40.32	protein_coding	8750
0.0002517	0.0758	122.74	233.87	0.52	8127989	SNORD50B	ENSG00000275072	small nucleolar RNA, C/D box 50B [Source:HGNC Symbol;Acc:HGNC:32722]	chr6	85677589	85677658	-1	q14.3	38.57	snoRNA	70
0.0086393	0.179	125.37	98.43	1.27	8117165	SOX4	ENSG00000124766	SRY-box transcription factor 4 [Source:HGNC Symbol;Acc:HGNC:11200]	chr6	21593751	21598619	1	p22.3	52.52	protein_coding	4869
0.0069464	0.169	311.29	428.63	0.73	8123507	TBP	ENSG00000112592	TATA-box binding protein [Source:HGNC Symbol;Acc:HGNC:11588]	chr6	170554302	170572870	1	q27	39.46	protein_coding	2318
0.009167	0.18	88.13	54.23	1.63	8123864	TFAP2A	ENSG00000137203	transcription factor AP-2 alpha [Source:HGNC Symbol;Acc:HGNC:11742]	chr6	10393186	10419659	-1	p24.3	47.57	protein_coding	8220
4.58e-05	0.0465	333.76	115.02	2.9	8130867	THBS2	ENSG00000186340	thrombospondin 2 [Source:HGNC Symbol;Acc:HGNC:11786]	chr6	169215780	169254050	-1	q27	49.53	protein_coding	7197
0.0071349	0.171	57.59	40.13	1.44	8122038	TMEM200A	ENSG00000164484	transmembrane protein 200A [Source:HGNC Symbol;Acc:HGNC:21075]	chr6	130366017	130443067	1	q23.1	38.05	protein_coding	5858
0.0088573	0.18	72.94	103.27	0.71	8121895	TRMT11	ENSG00000066651	tRNA methyltransferase 11 homolog [Source:HGNC Symbol;Acc:HGNC:21080]	chr6	125986479	126203817	1	q22.32	37.69	protein_coding	5722
0.0059085	0.165	189.32	251.68	0.75	8126588	XPO5	ENSG00000124571	exportin 5 [Source:HGNC Symbol;Acc:HGNC:17675]	chr6	43522334	43576038	-1	p21.1	43.77	protein_coding	8481
5.74e-05	0.0498	486.84	188.11	2.59	8132557	AEBP1	ENSG00000106624	AE binding protein 1 [Source:HGNC Symbol;Acc:HGNC:303]	chr7	44104345	44114562	1	p13	62.7	protein_coding	4971
0.0002784	0.0763	62.65	41.58	1.51	8132118	AQP1	ENSG00000240583	aquaporin 1 (Colton blood group) [Source:HGNC Symbol;Acc:HGNC:633]	chr7	30911853	30925517	1	p14.3	56.37	protein_coding	3261
0.0004449	0.0861	200.86	125.91	1.6	8134552	ARPC1B	ENSG00000130429	actin related protein 2/3 complex subunit 1B [Source:HGNC Symbol;Acc:HGNC:704]	chr7	99374249	99394816	1	q22.1	55.99	protein_coding	3988
0.0042269	0.154	169.96	127.3	1.34	8137700	C7orf50	ENSG00000146540	chromosome 7 open reading frame 50 [Source:HGNC Symbol;Acc:HGNC:22421]	chr7	996986	1138260	-1	p22.3	57.69	protein_coding	4961
0.0070701	0.17	856.44	499.08	1.72	8136347	CALD1	ENSG00000122786	caldesmon 1 [Source:HGNC Symbol;Acc:HGNC:1441]	chr7	134744252	134970729	1	q33	40.05	protein_coding	9844
0.0059385	0.165	87.73	131.91	0.67	8134091	CLDN12	ENSG00000157224	claudin 12 [Source:HGNC Symbol;Acc:HGNC:2034]	chr7	90383721	90513402	1	q21.13	39.02	protein_coding	6708
0.0007654	0.099	902.55	287.03	3.14	8134263	COL1A2	ENSG00000164692	collagen type I alpha 2 chain [Source:HGNC Symbol;Acc:HGNC:2198]	chr7	94394895	94431227	1	q21.3	37.38	protein_coding	10817
0.0035654	0.147	84.59	40.22	2.1	8138289	ETV1	ENSG00000006468	ETS variant transcription factor 1 [Source:HGNC Symbol;Acc:HGNC:3490]	chr7	13891229	13991425	-1	p21.2	36.3	protein_coding	9615
0.008056	0.175	223.99	157.62	1.42	8137244	GIMAP4	ENSG00000133574	GTPase, IMAP family member 4 [Source:HGNC Symbol;Acc:HGNC:21872]	chr7	150567369	150573953	1	q36.1	44.07	protein_coding	2099
0.0072853	0.171	83.09	63.75	1.3	8140319	HIP1	ENSG00000127946	huntingtin interacting protein 1 [Source:HGNC Symbol;Acc:HGNC:4913]	chr7	75533298	75738962	-1	q11.23	48.34	protein_coding	8955
0.0055525	0.165	41.87	31.91	1.31	8138728	HOXA4	ENSG00000197576	homeobox A4 [Source:HGNC Symbol;Acc:HGNC:5105]	chr7	27128507	27130780	-1	p15.2	56.95	protein_coding	1728
0.0067689	0.167	70.51	125.18	0.56	8138566	IGF2BP3	ENSG00000136231	insulin like growth factor 2 mRNA binding protein 3 [Source:HGNC Symbol;Acc:HGNC:28868]	chr7	23310209	23470491	-1	p15.3	41.63	protein_coding	8535
7.36e-05	0.0498	178.85	55.04	3.25	8139207	INHBA	ENSG00000122641	inhibin subunit beta A [Source:HGNC Symbol;Acc:HGNC:6066]	chr7	41667168	41705834	-1	p14.1	40.65	protein_coding	8284
0.0013221	0.118	186.45	307.08	0.61	8133095	INTS4P2	ENSG00000273024	integrator complex subunit 4 pseudogene 2 [Source:HGNC Symbol;Acc:HGNC:22351]	chr7	65647823	65718688	1	q11.21	40.32	transcribed_unprocessed_pseudogene	2019
0.0006816	0.0941	330.78	187.89	1.76	8142194	LAMB1	ENSG00000091136	laminin subunit beta 1 [Source:HGNC Symbol;Acc:HGNC:6486]	chr7	107923799	108003213	-1	q31.1	42.41	protein_coding	18592
0.0037129	0.148	169.12	269.47	0.63	8131927	MPP6	ENSG00000105926	membrane palmitoylated protein 6 [Source:HGNC Symbol;Acc:HGNC:18167]	chr7	24573268	24694193	1	p15.3	35.88	protein_coding	9369
0.0088176	0.18	74.53	53.06	1.4	8140227	NCF1	ENSG00000158517	neutrophil cytosolic factor 1 [Source:HGNC Symbol;Acc:HGNC:7660]	chr7	74773962	74789376	1	q11.23	54.16	protein_coding	3523
0.0058275	0.165	87.14	127.62	0.68	8131831	NUP42	ENSG00000136243	nucleoporin 42 [Source:HGNC Symbol;Acc:HGNC:17010]	chr7	23181841	23201011	1	p15.3	40.51	protein_coding	4352
0.0058464	0.165	192.53	131.17	1.47	8143327	PARP12	ENSG00000059378	poly(ADP-ribose) polymerase family member 12 [Source:HGNC Symbol;Acc:HGNC:21919]	chr7	140023749	140062951	-1	q34	45.56	protein_coding	5510
0.0076652	0.172	155.88	115.85	1.35	8134869	PCOLCE	ENSG00000106333	procollagen C-endopeptidase enhancer [Source:HGNC Symbol;Acc:HGNC:8738]	chr7	100602363	100608175	1	q22.1	60.83	protein_coding	3346
0.0020969	0.135	88.32	61.23	1.44	8137670	PDGFA	ENSG00000197461	platelet derived growth factor subunit A [Source:HGNC Symbol;Acc:HGNC:8799]	chr7	497258	520296	-1	p22.3	60.14	protein_coding	4151
0.0044534	0.158	313.31	218	1.44	8142981	PODXL	ENSG00000128567	podocalyxin like [Source:HGNC Symbol;Acc:HGNC:9171]	chr7	131500262	131558217	-1	q32.3	50.47	protein_coding	6893
0.0004584	0.0861	501.74	212.32	2.36	8143772	RARRES2	ENSG00000106538	retinoic acid receptor responder 2 [Source:HGNC Symbol;Acc:HGNC:9868]	chr7	150338317	150341662	-1	q36.1	62.31	protein_coding	1909
0.0059874	0.165	196.79	101.08	1.95	8140534	SEMA3C	ENSG00000075223	semaphorin 3C [Source:HGNC Symbol;Acc:HGNC:10725]	chr7	80742538	80922359	-1	q21.11	35.82	protein_coding	6100
0.0006102	0.0923	227.88	107.01	2.13	8135069	SERPINE1	ENSG00000106366	serpin family E member 1 [Source:HGNC Symbol;Acc:HGNC:8583]	chr7	101127104	101139247	1	q22.1	50.41	protein_coding	3156
0.006369	0.166	174.2	237	0.74	8131709	SP4	ENSG00000105866	Sp4 transcription factor [Source:HGNC Symbol;Acc:HGNC:11209]	chr7	21428043	21514822	1	p15.3	38.35	protein_coding	6225
0.0055666	0.165	169.43	93.9	1.8	8136863	TMEM139	ENSG00000178826	transmembrane protein 139 [Source:HGNC Symbol;Acc:HGNC:22058]	chr7	143279957	143288048	1	q34	47.5	protein_coding	2564
0.0043609	0.157	119.14	90.29	1.32	8139500	TNS3	ENSG00000136205	tensin 3 [Source:HGNC Symbol;Acc:HGNC:21616]	chr7	47275154	47582558	-1	p12.3	48.46	protein_coding	11764
0.002526	0.14	29.71	52.14	0.57	8150978	CA8	ENSG00000178538	carbonic anhydrase 8 [Source:HGNC Symbol;Acc:HGNC:1382]	chr8	60185412	60281400	-1	q12.1	39.03	protein_coding	7706
0.0042059	0.154	447.63	306.1	1.46	8149330	CTSB	ENSG00000164733	cathepsin B [Source:HGNC Symbol;Acc:HGNC:2527]	chr8	11842524	11869533	-1	p23.1	52.18	protein_coding	10541
0.0091215	0.18	25.41	34.69	0.73	8149245	DEFB109B	ENSG00000206034	defensin beta 109B [Source:HGNC Symbol;Acc:HGNC:33469]	chr8	7312846	7319951	1	p23.1	36.67	unprocessed_pseudogene	264
0.0013135	0.118	82.67	128.5	0.64	8147101	E2F5	ENSG00000133740	E2F transcription factor 5 [Source:HGNC Symbol;Acc:HGNC:3119]	chr8	85177154	85217158	1	q21.2	39.54	protein_coding	5999
0.0030447	0.144	155.79	25.21	6.18	8151532	FABP4	ENSG00000170323	fatty acid binding protein 4 [Source:HGNC Symbol;Acc:HGNC:3559]	chr8	81478419	81483236	-1	q21.13	34.83	protein_coding	1369
0.0074287	0.171	130.54	58.16	2.24	8152703	FBXO32	ENSG00000156804	F-box protein 32 [Source:HGNC Symbol;Acc:HGNC:16731]	chr8	123497889	123541206	-1	q24.13	44.08	protein_coding	7395
0.005317	0.165	134.42	260.66	0.52	8151032	GGH	ENSG00000137563	gamma-glutamyl hydrolase [Source:HGNC Symbol;Acc:HGNC:4248]	chr8	63014881	63039407	-1	q12.3	39.09	protein_coding	10619
0.0013104	0.118	229.41	129.56	1.77	8148448	KHDRBS3	ENSG00000131773	KH RNA binding domain containing, signal transduction associated 3 [Source:HGNC Symbol;Acc:HGNC:18117]	chr8	135457456	135656722	1	q24.23	38.22	protein_coding	8646
0.001618	0.127	37.25	61.16	0.61	8151296	LACTB2	ENSG00000147592	lactamase beta 2 [Source:HGNC Symbol;Acc:HGNC:18512]	chr8	70635318	70669185	-1	q13.3	38.39	protein_coding	1932
0.0009812	0.106	64.66	42.71	1.51	8149774	LOXL2	ENSG00000134013	lysyl oxidase like 2 [Source:HGNC Symbol;Acc:HGNC:6666]	chr8	23296897	23425328	-1	p21.3	48.43	protein_coding	5985
0.0033207	0.145	80.18	46.04	1.74	8144917	LPL	ENSG00000175445	lipoprotein lipase [Source:HGNC Symbol;Acc:HGNC:6677]	chr8	19901717	19967259	1	p21.3	40.01	protein_coding	4131
0.0021766	0.136	207.38	120.5	1.72	8148572	LY6E	ENSG00000160932	lymphocyte antigen 6 family member E [Source:HGNC Symbol;Acc:HGNC:6727]	chr8	143017982	143023832	1	q24.3	63.58	protein_coding	2638
0.0055836	0.165	196.8	262.92	0.75	8151711	NBN	ENSG00000104320	nibrin [Source:HGNC Symbol;Acc:HGNC:7652]	chr8	89933331	90003228	-1	q21.3	37.15	protein_coding	6161
0.0007403	0.099	51.24	81.06	0.63	8147424	NDUFAF6	ENSG00000156170	NADH:ubiquinone oxidoreductase complex assembly factor 6 [Source:HGNC Symbol;Acc:HGNC:28625]	chr8	94895767	95116455	1	q22.1	42.88	protein_coding	6403
0.00483	0.161	100.06	69.08	1.45	8144802	PDGFRL	ENSG00000104213	platelet derived growth factor receptor like [Source:HGNC Symbol;Acc:HGNC:8805]	chr8	17576433	17644071	1	p22	44.54	protein_coding	2420
0.0068438	0.168	35.87	24.43	1.47	8151768	RUNX1T1	ENSG00000079102	RUNX1 partner transcriptional co-repressor 1 [Source:HGNC Symbol;Acc:HGNC:1535]	chr8	91954967	92103286	-1	q21.3	38.11	protein_coding	13535
0.0080851	0.175	90.1	69.23	1.3	8145151	SORBS3	ENSG00000120896	sorbin and SH3 domain containing 3 [Source:HGNC Symbol;Acc:HGNC:30907]	chr8	22544986	22575788	1	p21.3	55.84	protein_coding	5865
0.0027616	0.144	699.41	267.88	2.61	8146863	SULF1	ENSG00000137573	sulfatase 1 [Source:HGNC Symbol;Acc:HGNC:20391]	chr8	69466624	69660915	1	q13.2	40.34	protein_coding	9372
0.0064407	0.166	402.4	552.82	0.73	8146379	UBE2V2	ENSG00000169139	ubiquitin conjugating enzyme E2 V2 [Source:HGNC Symbol;Acc:HGNC:12495]	chr8	48008415	48064708	1	q11.21	42.29	protein_coding	6591
0.0044149	0.157	94.59	127.59	0.74	8151401	UBE2W	ENSG00000104343	ubiquitin conjugating enzyme E2 W [Source:HGNC Symbol;Acc:HGNC:25616]	chr8	73780097	73878910	-1	q21.11	39.29	protein_coding	9091
0.0078902	0.173	38.06	52.85	0.72	8151909	UQCRB	ENSG00000156467	ubiquinol-cytochrome c reductase binding protein [Source:HGNC Symbol;Acc:HGNC:12582]	chr8	96222947	96235546	-1	q22.1	38.71	protein_coding	12600
0.0087295	0.18	87.6	66	1.33	8146475	XKR4	ENSG00000206579	XK related 4 [Source:HGNC Symbol;Acc:HGNC:29394]	chr8	55102028	55542054	1	q12.1	40.16	protein_coding	20246
0.0028287	0.144	122.87	179.75	0.68	8144953	XPO7	ENSG00000130227	exportin 7 [Source:HGNC Symbol;Acc:HGNC:14108]	chr8	21919662	22006585	1	p21.3	39.92	protein_coding	6918
0.001928	0.133	121.13	72.04	1.68	8147000	ZFHX4	ENSG00000091656	zinc finger homeobox 4 [Source:HGNC Symbol;Acc:HGNC:30939]	chr8	76681239	76867281	1	q21.13	36.38	protein_coding	15851
0.0061824	0.165	31.33	48.83	0.64	8144230	ZNF596	ENSG00000172748	zinc finger protein 596 [Source:HGNC Symbol;Acc:HGNC:27268]	chr8	232137	264703	1	p23.3	40.95	protein_coding	6008
0.000832	0.103	86.03	58.83	1.46	8158250	CERCAM	ENSG00000167123	cerebral endothelial cell adhesion molecule [Source:HGNC Symbol;Acc:HGNC:23723]	chr9	128411751	128437351	1	q34.11	55.11	protein_coding	6059
0.0002502	0.0758	86.94	53.03	1.64	8159142	COL5A1	ENSG00000130635	collagen type V alpha 1 chain [Source:HGNC Symbol;Acc:HGNC:2209]	chr9	134641803	134844843	1	q34.3	56	protein_coding	11160
0.0020616	0.135	34.27	23.87	1.44	8163908	GGTA1	ENSG00000204136	glycoprotein alpha-galactosyltransferase 1 (inactive) [Source:HGNC Symbol;Acc:HGNC:4253]	chr9	121444991	121499844	-1	q33.2	46.65	protein_coding	4318
0.0061686	0.165	139.05	106.11	1.31	8164398	GOLGA2	ENSG00000167110	golgin A2 [Source:HGNC Symbol;Acc:HGNC:4425]	chr9	128255829	128275995	-1	q34.11	52.34	protein_coding	6961
0.0015732	0.126	147.63	105.92	1.39	8157582	GSN	ENSG00000148180	gelsolin [Source:HGNC Symbol;Acc:HGNC:4620]	chr9	121207794	121332843	1	q33.2	46.87	protein_coding	11018
0.0062739	0.165	75.61	46.95	1.61	8163892	GSN-AS1	ENSG00000235865	GSN antisense RNA 1 [Source:HGNC Symbol;Acc:HGNC:23372]	chr9	121280768	121285530	-1	q33.2	52.28	lncRNA	4763
0.0029672	0.144	138.55	103.96	1.33	8156610	HABP4	ENSG00000130956	hyaluronan binding protein 4 [Source:HGNC Symbol;Acc:HGNC:17062]	chr9	96450169	96491336	1	q22.32	43.82	protein_coding	4088
0.0037461	0.148	169.13	124.82	1.36	8159521	PTGDS	ENSG00000107317	prostaglandin D2 synthase [Source:HGNC Symbol;Acc:HGNC:9592]	chr9	136975092	136981742	1	q34.3	66.35	protein_coding	2712
0.0028669	0.144	75.16	34.18	2.2	8163202	SVEP1	ENSG00000165124	sushi, von Willebrand factor type A, EGF and pentraxin domain containing 1 [Source:HGNC Symbol;Acc:HGNC:15985]	chr9	110365248	110579880	-1	q31.3	37.88	protein_coding	14193
0.0083349	0.177	130.69	99.63	1.31	8161056	TLN1	ENSG00000137076	talin 1 [Source:HGNC Symbol;Acc:HGNC:11845]	chr9	35696948	35732195	-1	p13.3	51.07	protein_coding	9876
0.0041127	0.153	136.73	89.46	1.53	8171119	ASMTL	ENSG00000169093	acetylserotonin O-methyltransferase like [Source:HGNC Symbol;Acc:HGNC:751]	chrX	1403139	1453762	-1	p22.33	52.23	protein_coding	3506
< 1e-07	0.00142	502.7	172.83	2.91	8170648	BGN	ENSG00000182492	biglycan [Source:HGNC Symbol;Acc:HGNC:1044]	chrX	153494980	153509546	1	q28	62.62	protein_coding	2404
0.0065119	0.166	30.29	23.38	1.3	8174051	BTK	ENSG00000010671	Bruton tyrosine kinase [Source:HGNC Symbol;Acc:HGNC:1133]	chrX	101349447	101390796	-1	q22.1	43.18	protein_coding	4575
0.0031838	0.144	67.61	50.28	1.34	8176306	CSF2RA	ENSG00000198223	colony stimulating factor 2 receptor subunit alpha [Source:HGNC Symbol;Acc:HGNC:2435]	chrX	1268800	1310381	1	p22.33	50.88	protein_coding	3830
0.0025403	0.14	27.94	40.63	0.69	8166585	DCAF8L2	ENSG00000189186	DDB1 and CUL4 associated factor 8 like 2 [Source:HGNC Symbol;Acc:HGNC:31811]	chrX	27590382	27748821	1	p21.3	35.74	protein_coding	4449
0.0099402	0.183	70.06	115.46	0.61	8170992	DKC1	ENSG00000130826	dyskerin pseudouridine synthase 1 [Source:HGNC Symbol;Acc:HGNC:2890]	chrX	154762742	154777689	1	q28	45.62	protein_coding	4203
0.0009759	0.106	108.29	68.46	1.58	8175039	ELF4	ENSG00000102034	E74 like ETS transcription factor 4 [Source:HGNC Symbol;Acc:HGNC:3319]	chrX	130063955	130110716	-1	q26.1	51.68	protein_coding	5237
0.001838	0.133	203.77	129.56	1.57	8176026	FLNA	ENSG00000196924	filamin A [Source:HGNC Symbol;Acc:HGNC:3754]	chrX	154348524	154374634	-1	q28	62.28	protein_coding	10860
0.0008541	0.103	121.61	69.06	1.76	8173444	IL2RG	ENSG00000147168	interleukin 2 receptor subunit gamma [Source:HGNC Symbol;Acc:HGNC:6010]	chrX	71107404	71112108	-1	q13.1	49.71	protein_coding	2760
0.0019768	0.133	58.33	87.77	0.66	8171837	KLHL15	ENSG00000174010	kelch like family member 15 [Source:HGNC Symbol;Acc:HGNC:29347]	chrX	23983720	24027186	-1	p22.11	41.85	protein_coding	6272
0.0009685	0.106	328.06	138.22	2.37	8171172	MXRA5	ENSG00000101825	matrix remodeling associated 5 [Source:HGNC Symbol;Acc:HGNC:7539]	chrX	3308565	3346652	-1	p22.33	43.18	protein_coding	9804
0.002001	0.134	31.37	45.39	0.69	8171561	SCML2	ENSG00000102098	Scm polycomb group protein like 2 [Source:HGNC Symbol;Acc:HGNC:10581]	chrX	18239313	18354688	-1	p22.13	39.56	protein_coding	4327
0.0068091	0.168	89	65.93	1.35	8174692	SEPTIN6	ENSG00000125354	septin 6 [Source:HGNC Symbol;Acc:HGNC:15848]	chrX	119615724	119693370	-1	q24	47.21	protein_coding	6245
0.0009885	0.106	47.97	33.77	1.42	8175574	SLITRK4	ENSG00000179542	SLIT and NTRK like family member 4 [Source:HGNC Symbol;Acc:HGNC:23502]	chrX	143622790	143636101	-1	q27.3	41.25	protein_coding	9238
0.0056366	0.165	434.6	621.52	0.7	8174985	SMARCA1	ENSG00000102038	SWI/SNF related, matrix associated, actin dependent regulator of chromatin, subfamily a, member 1 [Source:HGNC Symbol;Acc:HGNC:11097]	chrX	129446501	129523500	-1	q26.1	36.87	protein_coding	4363
0.0096484	0.183	19.1	13.84	1.38	8171896	TASL	ENSG00000120280	TLR adaptor interacting with endolysosomal SLC15A4 [Source:HGNC Symbol;Acc:HGNC:25667]	chrX	30558809	30577766	-1	p21.2	39.28	protein_coding	1792
0.002395	0.139	95.14	168.17	0.57	8173059	WNK3	ENSG00000196632	WNK lysine deficient protein kinase 3 [Source:HGNC Symbol;Acc:HGNC:14543]	chrX	54192823	54358642	-1	p11.22	40.03	protein_coding	11472

## Sheet: GSE73064 Asc vs 1ary
Parametric p-value	FDR	Ascites	Primary tumor	Fold-change	ProbeSet	Gene_name	Gene_ID	Gene_description	Chromosome_scaffold_name	Gene_start_bp	Gene_end_bp	Strand	Karyotype_band	Gene_type	Gene_Length
0.0082016	0.177	510.88	265.53	1.92	223120_at	FUCA2	ENSG00000001036	alpha-L-fucosidase 2	chr6	143494812	143511720	-1	q24.2	protein_coding
0.004801	0.161	113.97	207.95	0.55	228433_at	NFYA	ENSG00000001167	nuclear transcription factor Y subunit alpha	chr6	41072974	41102403	1	p21.1	protein_coding
0.0017339	0.161	748.31	200.43	3.73	218345_at	TMEM176A	ENSG00000002933	transmembrane protein 176A	chr7	150800403	150805118	1	q36.1	protein_coding
0.0001553	0.12	123.72	277.05	0.45	228030_at	RBM6	ENSG00000004534	RNA binding motif protein 6	chr3	49940007	50100045	1	p21.31	protein_coding
0.0046915	0.161	286.54	122.13	2.35	225639_at	SKAP2	ENSG00000005020	src kinase associated phosphoprotein 2	chr7	26667068	26995239	-1	p15.2	protein_coding
0.0001549	0.12	857.58	284.5	3.01	204362_at	SKAP2	ENSG00000005020	src kinase associated phosphoprotein 2	chr7	26667068	26995239	-1	p15.2	protein_coding
0.0079841	0.176	425	281.32	1.51	218802_at	MCUB	ENSG00000005059	mitochondrial calcium uniporter dominant negative subunit beta	chr4	109560209	109688719	1	q25	protein_coding
0.0040446	0.161	128.68	24.13	5.33	1554240_a_at	ITGAL	ENSG00000005844	integrin subunit alpha L	chr16	30472658	30523567	1	p11.2	protein_coding
0.003343	0.161	1401.84	736.37	1.9	203041_s_at	LAMP2	ENSG00000005893	lysosomal associated membrane protein 2	chrX	120426148	120469365	-1	q24	protein_coding
0.0089241	0.18	42.31	81.03	0.52	213927_at	MAP3K9	ENSG00000006432	mitogen-activated protein kinase kinase kinase 9	chr14	70722526	70809534	-1	q24.2	protein_coding
0.0043506	0.161	101.55	153.86	0.66	230079_at	ST7L	ENSG00000007341	suppression of tumorigenicity 7 like	chr1	112523514	112620825	-1	p13.2	protein_coding
0.0038033	0.161	185.06	313.54	0.59	209454_s_at	TEAD3	ENSG00000007866	TEA domain transcription factor 3	chr6	35473597	35497079	-1	p21.31	protein_coding
0.0079504	0.176	279.14	429.07	0.65	225147_at	CYTH3	ENSG00000008256	cytohesin 3	chr7	6161776	6272644	-1	p22.1	protein_coding
0.0022992	0.161	255.11	156.22	1.63	233651_s_at	MPND	ENSG00000008382	MPN domain containing	chr19	4343527	4360086	1	p13.3	protein_coding
0.0015434	0.161	340.62	670.02	0.51	209674_at	CRY1	ENSG00000008405	cryptochrome circadian regulator 1	chr12	106991364	107093549	-1	q23.3	protein_coding
0.0030402	0.161	77.46	163.89	0.47	228157_at	ZNF207	ENSG00000010244	zinc finger protein 207	chr17	32350132	32381885	1	q11.2	protein_coding
0.0060103	0.167	154.44	225.51	0.68	239937_at	ZNF207	ENSG00000010244	zinc finger protein 207	chr17	32350132	32381885	1	q11.2	protein_coding
0.0009216	0.161	883.39	164.16	5.38	38487_at	STAB1	ENSG00000010327	stabilin 1	chr3	52495338	52524495	1	p21.1	protein_coding
0.0036756	0.161	465.89	111.53	4.18	204150_at	STAB1	ENSG00000010327	stabilin 1	chr3	52495338	52524495	1	p21.1	protein_coding
0.0091466	0.18	86.25	48.8	1.77	235754_at	HFE	ENSG00000010704	homeostatic iron regulator	chr6	26087281	26098343	1	p22.2	protein_coding
0.0014786	0.161	146.92	85.8	1.71	206087_x_at	HFE	ENSG00000010704	homeostatic iron regulator	chr6	26087281	26098343	1	p22.2	protein_coding
0.0036594	0.161	2091.09	200.45	10.43	204122_at	TYROBP	ENSG00000011600	transmembrane immune signaling adaptor TYROBP	chr19	35904401	35908295	-1	q13.12	protein_coding
0.0039979	0.161	454.51	213.83	2.13	38964_r_at	WAS	ENSG00000015285	WASP actin nucleation promoting factor	chrX	48676596	48691427	1	p11.23	protein_coding
0.0096649	0.18	48.82	73.76	0.66	213430_at	RUFY3	ENSG00000018189	RUN and FYVE domain containing 3	chr4	70704204	70808619	1	q13.3	protein_coding
0.0063455	0.169	133.23	83.19	1.6	225108_at	AGPS	ENSG00000018510	alkylglycerone phosphate synthase	chr2	177392746	177567024	1	q31.2	protein_coding
0.0053864	0.164	151.21	94.99	1.59	225113_at	AGPS	ENSG00000018510	alkylglycerone phosphate synthase	chr2	177392746	177567024	1	q31.2	protein_coding
0.0093736	0.18	424.98	1201.48	0.35	239213_at	SERPINB1	ENSG00000021355	serpin family B member 1	chr6	2832332	2841959	-1	p25.2	protein_coding
0.0033281	0.161	42.33	71.66	0.59	220135_s_at	SLC7A9	ENSG00000021488	solute carrier family 7 member 9	chr19	32830509	32869767	-1	q13.11	protein_coding
0.0039164	0.161	542.04	202.99	2.67	204858_s_at	TYMP	ENSG00000025708	thymidine phosphorylase	chr22	50525752	50530032	-1	q13.33	protein_coding
0.008091	0.176	2431.18	990.63	2.45	216041_x_at	GRN	ENSG00000030582	granulin precursor	chr17	44345246	44353106	1	q21.31	protein_coding
0.0047252	0.161	1083.32	467.67	2.32	211284_s_at	GRN	ENSG00000030582	granulin precursor	chr17	44345246	44353106	1	q21.31	protein_coding
0.0045314	0.161	2389.7	929.41	2.57	200678_x_at	GRN	ENSG00000030582	granulin precursor	chr17	44345246	44353106	1	q21.31	protein_coding
0.0034779	0.161	459.68	161.01	2.86	203167_at	TIMP2	ENSG00000035862	TIMP metallopeptidase inhibitor 2	chr17	78852977	78925387	-1	q25.3	protein_coding
0.0083141	0.178	366.36	206.59	1.77	204332_s_at	AGA	ENSG00000038002	aspartylglucosaminidase	chr4	177430774	177442437	-1	q34.3	protein_coding
0.0008342	0.161	119.7	16.14	7.42	214770_at	MSR1	ENSG00000038945	macrophage scavenger receptor 1	chr8	16107878	16567490	-1	p22	protein_coding
0.0043575	0.161	56.45	15.21	3.71	205269_at	LCP2	ENSG00000043462	lymphocyte cytosolic protein 2	chr5	170246233	170297815	-1	q35.1	protein_coding
0.0042931	0.161	275.58	58.68	4.7	205270_s_at	LCP2	ENSG00000043462	lymphocyte cytosolic protein 2	chr5	170246233	170297815	-1	q35.1	protein_coding
0.0092318	0.18	119.57	164.14	0.73	209438_at	PHKA2	ENSG00000044446	phosphorylase kinase regulatory subunit alpha 2	chrX	18892298	18984114	-1	p22.13	protein_coding
0.0063195	0.169	22.66	15.09	1.5	239989_at	CNTLN	ENSG00000044459	centlein	chr9	17134982	17503923	1	p22.2	protein_coding
0.0045892	0.161	127.46	237.14	0.54	209168_at	GPM6B	ENSG00000046653	glycoprotein M6B	chrX	13770939	13938638	-1	p22.2	protein_coding
0.007346	0.172	91.58	203.54	0.45	209169_at	GPM6B	ENSG00000046653	glycoprotein M6B	chrX	13770939	13938638	-1	p22.2	protein_coding
0.0075038	0.173	201.34	133.5	1.51	222613_at	C12orf4	ENSG00000047621	chromosome 12 open reading frame 4	chr12	4487735	4538508	-1	p13.32	protein_coding
0.0021522	0.161	114.6	39.19	2.92	227178_at	CELF2	ENSG00000048740	CUGBP Elav-like family member 2	chr10	10798397	11336675	1	p14	protein_coding
0.0033751	0.161	198.86	78.79	2.52	202156_s_at	CELF2	ENSG00000048740	CUGBP Elav-like family member 2	chr10	10798397	11336675	1	p14	protein_coding
0.0020776	0.161	739.41	273.4	2.7	202157_s_at	CELF2	ENSG00000048740	CUGBP Elav-like family member 2	chr10	10798397	11336675	1	p14	protein_coding
0.0073104	0.172	700.66	412.96	1.7	211749_s_at	VAMP3	ENSG00000049245	vesicle associated membrane protein 3	chr1	7771296	7781432	1	p36.23	protein_coding
0.0024655	0.161	2992.71	974.53	3.07	201944_at	HEXB	ENSG00000049860	hexosaminidase subunit beta	chr5	74640023	74722647	1	q13.3	protein_coding
0.0047734	0.161	705.46	376.1	1.88	223215_s_at	JKAMP	ENSG00000050130	JNK1/MAPK8 associated membrane protein	chr14	59484443	59505410	1	q23.1	protein_coding
0.0074939	0.173	92.61	150.04	0.62	228596_at	ARHGEF5	ENSG00000050327	Rho guanine nucleotide exchange factor 5	chr7	144355288	144380632	1	q35	protein_coding
0.0001018	0.12	11.24	44.08	0.26	242163_at	THRAP3	ENSG00000054118	thyroid hormone receptor associated protein 3	chr1	36224432	36305357	1	p34.3	protein_coding
0.0097798	0.181	263.56	169.14	1.56	209650_s_at	TBC1D22A	ENSG00000054611	TBC1 domain family member 22A	chr22	46762617	47175699	1	q13.31	protein_coding
0.0046516	0.161	384.47	1741	0.22	202267_at	LAMC2	ENSG00000058085	laminin subunit gamma 2	chr1	183186238	183245127	1	q25.3	protein_coding
0.0011007	0.161	96.71	384.02	0.25	207517_at	LAMC2	ENSG00000058085	laminin subunit gamma 2	chr1	183186238	183245127	1	q25.3	protein_coding
0.0047096	0.161	28.65	14.84	1.93	236345_at	TBXAS1	ENSG00000059377	thromboxane A synthase 1	chr7	139777051	140020325	1	q34	protein_coding
0.0022483	0.161	207.37	128.2	1.62	204300_at	GATB	ENSG00000059691	glutamyl-tRNA amidotransferase subunit B	chr4	151670504	151761007	-1	q31.3	protein_coding
0.0070231	0.171	348.38	134.28	2.59	202497_x_at	SLC2A3	ENSG00000059804	solute carrier family 2 member 3	chr12	7919230	7936187	-1	p13.31	protein_coding
0.0085113	0.178	210.92	100.35	2.1	202498_s_at	SLC2A3	ENSG00000059804	solute carrier family 2 member 3	chr12	7919230	7936187	-1	p13.31	protein_coding
0.0054103	0.164	555.84	203.2	2.74	202499_s_at	SLC2A3	ENSG00000059804	solute carrier family 2 member 3	chr12	7919230	7936187	-1	p13.31	protein_coding
0.005376	0.164	1591.15	3023.21	0.53	220990_s_at	VMP1	ENSG00000062716	vacuole membrane protein 1	chr17	59707192	59842255	1	q23.1	protein_coding
0.0021495	0.161	44.98	70.68	0.64	229354_at	AHRR	ENSG00000063438	aryl-hydrocarbon receptor repressor	chr5	321714	438291	1	p15.33	protein_coding
0.008632	0.178	2233.75	1252.83	1.78	200661_at	CTSA	ENSG00000064601	cathepsin A	chr20	45890144	45898949	1	q13.12	protein_coding
0.0011932	0.161	191.27	417.49	0.46	204404_at	SLC12A2	ENSG00000064651	solute carrier family 12 member 2	chr5	128083766	128189677	1	q23.3	protein_coding
0.0096425	0.18	386.79	231.95	1.67	201605_x_at	CNN2	ENSG00000064666	calponin 2	chr19	1026586	1039068	1	p13.3	protein_coding
9.93e-05	0.12	62.03	29.98	2.07	228471_at	ANKRD44	ENSG00000065413	ankyrin repeat domain 44	chr2	196967017	197311173	-1	q33.1	protein_coding
0.0032056	0.161	28.52	10.79	2.64	226641_at	ANKRD44	ENSG00000065413	ankyrin repeat domain 44	chr2	196967017	197311173	-1	q33.1	protein_coding
0.0002604	0.132	717.94	1934.1	0.37	201996_s_at	SPEN	ENSG00000065526	spen family transcriptional repressor	chr1	15836095	15940456	1	p36.21	protein_coding
0.001184	0.161	338.42	662.79	0.51	1556059_s_at	SPEN	ENSG00000065526	spen family transcriptional repressor	chr1	15836095	15940456	1	p36.21	protein_coding
0.0008415	0.161	1053.98	2110.48	0.5	201997_s_at	SPEN	ENSG00000065526	spen family transcriptional repressor	chr1	15836095	15940456	1	p36.21	protein_coding
0.0029218	0.161	230.39	82.71	2.79	219079_at	CYB5R4	ENSG00000065615	cytochrome b5 reductase 4	chr6	83859656	83967423	1	q14.2	protein_coding
0.0018781	0.161	523.09	293.67	1.78	212350_at	TBC1D1	ENSG00000065882	TBC1 domain family member 1	chr4	37891084	38139175	1	p14	protein_coding
0.0063926	0.169	356.79	527.53	0.68	207318_s_at	CDK13	ENSG00000065883	cyclin dependent kinase 13	chr7	39950121	40099580	1	p14.1	protein_coding
0.0002962	0.132	379.14	191.99	1.97	204735_at	PDE4A	ENSG00000065989	phosphodiesterase 4A	chr19	10416773	10469630	1	p13.2	protein_coding
0.0097397	0.181	195.98	79.35	2.47	219918_s_at	ASPM	ENSG00000066279	assembly factor for spindle microtubules	chr1	197084121	197146694	-1	q31.3	protein_coding
0.0042862	0.161	487.14	46.04	10.58	230391_at	CD84	ENSG00000066294	CD84 molecule	chr1	160541095	160579516	-1	q23.3	protein_coding
0.0032159	0.161	336.26	46.3	7.26	205988_at	CD84	ENSG00000066294	CD84 molecule	chr1	160541095	160579516	-1	q23.3	protein_coding
0.0058151	0.165	201.91	477.11	0.42	213700_s_at	PKM	ENSG00000067225	pyruvate kinase M1/2	chr15	72199029	72231819	-1	q23	protein_coding
0.0088048	0.179	157.06	93.61	1.68	218394_at	ROGDI	ENSG00000067836	rogdi atypical leucine zipper	chr16	4796968	4802880	-1	p13.3	protein_coding
0.0066482	0.169	68.89	34.41	2	206348_s_at	PDK3	ENSG00000067992	pyruvate dehydrogenase kinase 3	chrX	24465244	24550466	1	p22.11	protein_coding
0.0009077	0.161	583.29	270.35	2.16	228273_at	PRR11	ENSG00000068489	proline rich 11	chr17	59155732	59206709	1	q22	protein_coding
0.0011087	0.161	590.53	1417.33	0.42	40016_g_at	MAST4	ENSG00000069020	microtubule associated serine/threonine kinase family member 4	chr5	66596380	67169593	1	q12.3	protein_coding
0.0065896	0.169	276.09	711.61	0.39	225613_at	MAST4	ENSG00000069020	microtubule associated serine/threonine kinase family member 4	chr5	66596380	67169593	1	q12.3	protein_coding
0.0091927	0.18	307.95	708.64	0.43	225611_at	MAST4	ENSG00000069020	microtubule associated serine/threonine kinase family member 4	chr5	66596380	67169593	1	q12.3	protein_coding
0.003875	0.161	233.51	454	0.51	210958_s_at	MAST4	ENSG00000069020	microtubule associated serine/threonine kinase family member 4	chr5	66596380	67169593	1	q12.3	protein_coding
0.0006065	0.148	30.28	198.28	0.15	212950_at	ADGRF5	ENSG00000069122	adhesion G protein-coupled receptor F5	chr6	46852522	46954943	-1	p12.3	protein_coding
0.0044979	0.161	28.39	95.87	0.3	212951_at	ADGRF5	ENSG00000069122	adhesion G protein-coupled receptor F5	chr6	46852522	46954943	-1	p12.3	protein_coding
0.0043489	0.161	279.72	562.92	0.5	204908_s_at	BCL3	ENSG00000069399	BCL3 transcription coactivator	chr19	44747705	44760044	1	q13.32	protein_coding
0.0048321	0.161	280.08	120.19	2.33	203402_at	KCNAB2	ENSG00000069424	potassium voltage-gated channel subfamily A regulatory beta subunit 2	chr1	5990927	6101193	1	p36.31	protein_coding
0.0077718	0.175	117.2	73.81	1.59	228486_at	SLC44A1	ENSG00000070214	solute carrier family 44 member 1	chr9	105244622	105439171	1	q31.1	protein_coding
0.0054082	0.164	334.77	223.96	1.49	213836_s_at	WIPI1	ENSG00000070540	WD repeat domain, phosphoinositide interacting 1	chr17	68420948	68457513	-1	q24.2	protein_coding
0.0080175	0.176	334.52	225.63	1.48	203827_at	WIPI1	ENSG00000070540	WD repeat domain, phosphoinositide interacting 1	chr17	68420948	68457513	-1	q24.2	protein_coding
0.0023201	0.161	291.87	485.15	0.6	224627_at	GBA2	ENSG00000070610	glucosylceramidase beta 2	chr9	35736866	35749228	-1	p13.3	protein_coding
0.0079607	0.176	177.61	100.37	1.77	210232_at	CDC42	ENSG00000070831	cell division cycle 42	chr1	22025511	22101360	1	p36.12	protein_coding
0.0049385	0.161	137.03	90.74	1.51	214230_at	CDC42	ENSG00000070831	cell division cycle 42	chr1	22025511	22101360	1	p36.12	protein_coding
0.0013588	0.161	670.4	413.4	1.62	202053_s_at	ALDH3A2	ENSG00000072210	aldehyde dehydrogenase 3 family member A2	chr17	19648136	19685760	1	p11.2	protein_coding
0.0027954	0.161	293.73	118.68	2.48	207165_at	HMMR	ENSG00000072571	hyaluronan mediated motility receptor	chr5	163460203	163491941	1	q34	protein_coding
0.0057024	0.165	193.12	74.33	2.6	209709_s_at	HMMR	ENSG00000072571	hyaluronan mediated motility receptor	chr5	163460203	163491941	1	q34	protein_coding
0.0009131	0.161	311.62	30.16	10.33	210889_s_at	FCGR2B	ENSG00000072694	Fc fragment of IgG receptor IIb	chr1	161663143	161678654	1	q23.3	protein_coding
0.0024462	0.161	1842.53	3170.01	0.58	218847_at	IGF2BP2	ENSG00000073792	insulin like growth factor 2 mRNA binding protein 2	chr3	185643130	185825042	-1	q27.2	protein_coding
0.0057578	0.165	33.29	84.13	0.4	1562440_at	MAP3K13	ENSG00000073803	mitogen-activated protein kinase kinase kinase 13	chr3	185282941	185489094	1	q27.2	protein_coding
0.0037177	0.161	102.58	282.13	0.36	203238_s_at	NOTCH3	ENSG00000074181	notch receptor 3	chr19	15159038	15200995	-1	p13.12	protein_coding
0.002786	0.161	97.34	61.84	1.57	208920_at	SRI	ENSG00000075142	sorcin	chr7	88205115	88226993	-1	q21.12	protein_coding
0.0038955	0.161	587.8	383.02	1.53	202520_s_at	MLH1	ENSG00000076242	mutL homolog 1	chr3	36993350	37050846	1	p22.2	protein_coding
0.0080463	0.176	38.26	65.79	0.58	238851_at	ANKRD13A	ENSG00000076513	ankyrin repeat domain 13A	chr12	109999186	110039763	1	q24.11	protein_coding
0.0021063	0.161	119.45	526.58	0.23	209087_x_at	MCAM	ENSG00000076706	melanoma cell adhesion molecule	chr11	119308529	119321521	-1	q23.3	protein_coding
0.0020901	0.161	258.5	981.84	0.26	211340_s_at	MCAM	ENSG00000076706	melanoma cell adhesion molecule	chr11	119308529	119321521	-1	q23.3	protein_coding
0.0050108	0.162	124.46	488.95	0.25	210869_s_at	MCAM	ENSG00000076706	melanoma cell adhesion molecule	chr11	119308529	119321521	-1	q23.3	protein_coding
0.0097658	0.181	448.28	316.69	1.42	223229_at	UBE2T	ENSG00000077152	ubiquitin conjugating enzyme E2 T	chr1	202331657	202341980	-1	q32.1	protein_coding
0.0039099	0.161	386.13	59.13	6.53	230925_at	APBB1IP	ENSG00000077420	amyloid beta precursor protein binding family B member 1 interacting protein	chr10	26438341	26567803	1	p12.1	protein_coding
0.0055956	0.165	454.31	182.86	2.48	204137_at	GPR137B	ENSG00000077585	G protein-coupled receptor 137B	chr1	236142505	236221865	1	q42.3	protein_coding
0.0092364	0.18	175.53	276.05	0.64	215404_x_at	FGFR1	ENSG00000077782	fibroblast growth factor receptor 1	chr8	38400215	38468834	-1	p11.23	protein_coding
0.0066275	0.169	219.59	85.48	2.57	210140_at	CST7	ENSG00000077984	cystatin F	chr20	24949269	24959928	1	p11.21	protein_coding
0.0095994	0.18	257.18	140	1.84	214442_s_at	PIAS2	ENSG00000078043	protein inhibitor of activated STAT 2	chr18	46803218	46920160	-1	q21.1	protein_coding
0.0020937	0.161	115.17	40.11	2.87	203961_at	NEBL	ENSG00000078114	nebulette	chr10	20779973	21293011	-1	p12.31	protein_coding
0.0010905	0.161	70.19	33.5	2.1	203962_s_at	NEBL	ENSG00000078114	nebulette	chr10	20779973	21293011	-1	p12.31	protein_coding
0.0003178	0.132	419.03	1910.48	0.22	222802_at	EDN1	ENSG00000078401	endothelin 1	chr6	12290361	12297194	1	p24.1	protein_coding
0.0001909	0.12	288.16	1122.65	0.26	218995_s_at	EDN1	ENSG00000078401	endothelin 1	chr6	12290361	12297194	1	p24.1	protein_coding
0.0013214	0.161	24.39	14.28	1.71	1553856_s_at	P2RY10	ENSG00000078589	P2Y receptor family member 10	chrX	78945332	78963727	1	q21.1	protein_coding
0.0095501	0.18	196.25	499.96	0.39	238549_at	CBFA2T2	ENSG00000078699	CBFA2/RUNX1 partner transcriptional co-repressor 2	chr20	33490075	33650036	1	q11.21	protein_coding
0.0093007	0.18	15.23	8.47	1.8	207777_s_at	SP140	ENSG00000079263	SP140 nuclear body protein	chr2	230203110	230313215	1	q37.1	protein_coding
0.0096633	0.18	587.29	861.52	0.68	233056_x_at	DLGAP4	ENSG00000080845	DLG associated protein 4	chr20	36306336	36528637	1	q11.23	protein_coding
0.0047081	0.161	120.75	65.28	1.85	204162_at	NDC80	ENSG00000080986	NDC80 kinetochore complex component	chr18	2571557	2616635	1	p11.32	protein_coding
0.0010927	0.161	83.58	154.6	0.54	222791_at	RSBN1	ENSG00000081019	round spermatid basic protein 1	chr1	113761832	113812476	-1	p13.2	protein_coding
0.0039664	0.161	145.66	69.56	2.09	235198_at	OSTM1	ENSG00000081087	osteoclastogenesis associated transmembrane protein 1	chr6	108041409	108165854	-1	q21	protein_coding
0.0028428	0.161	456.16	64.2	7.11	212587_s_at	PTPRC	ENSG00000081237	protein tyrosine phosphatase receptor type C	chr1	198638457	198757476	1	q31.3	protein_coding
0.0062389	0.169	141.03	28.39	4.97	207238_s_at	PTPRC	ENSG00000081237	protein tyrosine phosphatase receptor type C	chr1	198638457	198757476	1	q31.3	protein_coding
0.0060069	0.167	239.42	98.46	2.43	227056_at	DELE1	ENSG00000081791	DAP3 binding cell death enhancer 1	chr5	141923855	141942047	1	q31.3	protein_coding
0.007785	0.175	72.46	109.67	0.66	214594_x_at	ATP8B1	ENSG00000081923	ATPase phospholipid transporting 8B1	chr18	57646426	57803315	-1	q21.31	protein_coding
0.003567	0.161	97.22	42.79	2.27	211794_at	FYB1	ENSG00000082074	FYN binding protein 1	chr5	39105252	39274528	-1	p13.1	protein_coding
0.0059105	0.166	216.27	82.8	2.61	211795_s_at	FYB1	ENSG00000082074	FYN binding protein 1	chr5	39105252	39274528	-1	p13.1	protein_coding
0.0036736	0.161	161.15	25.66	6.28	227266_s_at	FYB1	ENSG00000082074	FYN binding protein 1	chr5	39105252	39274528	-1	p13.1	protein_coding
0.0068776	0.17	44.64	29.57	1.51	204062_s_at	ULK2	ENSG00000083290	unc-51 like autophagy activating kinase 2	chr17	19770829	19867936	-1	p11.2	protein_coding
0.0078497	0.176	310.75	161.16	1.93	225282_at	SMAP2	ENSG00000084070	small ArfGAP2	chr1	40344850	40423326	1	p34.2	protein_coding
0.0086921	0.178	4849.25	3315.63	1.46	208704_x_at	APLP2	ENSG00000084234	amyloid beta precursor like protein 2	chr11	130068147	130144811	1	q24.3	protein_coding
0.0075239	0.173	1765.82	987.48	1.79	208703_s_at	APLP2	ENSG00000084234	amyloid beta precursor like protein 2	chr11	130068147	130144811	1	q24.3	protein_coding
0.0062558	0.169	5015	3392.54	1.48	208248_x_at	APLP2	ENSG00000084234	amyloid beta precursor like protein 2	chr11	130068147	130144811	1	q24.3	protein_coding
0.0069995	0.171	328.47	36.91	8.9	205237_at	FCN1	ENSG00000085265	ficolin 1	chr9	134903232	134917912	-1	q34.3	protein_coding
0.0001733	0.12	61.56	128.89	0.48	223225_s_at	SEH1L	ENSG00000085415	SEH1 like nucleoporin	chr18	12947133	12987536	1	p11.21	protein_coding
0.0074482	0.173	401.14	157.53	2.55	218404_at	SNX10	ENSG00000086300	sorting nexin 10	chr7	26291862	26374383	1	p15.2	protein_coding
0.0017128	0.161	322.34	172.06	1.87	223148_at	PIGS	ENSG00000087111	phosphatidylinositol glycan anchor biosynthesis class S	chr17	28553383	28571794	-1	q11.2	protein_coding
0.0029965	0.161	318.66	173.87	1.83	210052_s_at	TPX2	ENSG00000088325	TPX2 microtubule nucleation factor	chr20	31739271	31801805	1	q11.21	protein_coding
0.0068342	0.17	71.28	26.96	2.64	227911_at	ARHGAP28	ENSG00000088756	Rho GTPase activating protein 28	chr18	6729716	6915716	1	p11.31	protein_coding
0.0066398	0.169	1525.29	637.23	2.39	224252_s_at	FXYD5	ENSG00000089327	FXYD domain containing ion transport regulator 5	chr19	35154730	35169881	1	q13.12	protein_coding
0.0060987	0.168	1865.36	744.52	2.51	218084_x_at	FXYD5	ENSG00000089327	FXYD domain containing ion transport regulator 5	chr19	35154730	35169881	1	q13.12	protein_coding
0.0001896	0.12	86.55	42.11	2.06	202094_at	BIRC5	ENSG00000089685	baculoviral IAP repeat containing 5	chr17	78214186	78225636	1	q25.3	protein_coding
0.0098676	0.181	137.21	85.85	1.6	210334_x_at	BIRC5	ENSG00000089685	baculoviral IAP repeat containing 5	chr17	78214186	78225636	1	q25.3	protein_coding
0.0009091	0.161	329.51	141.25	2.33	202095_s_at	BIRC5	ENSG00000089685	baculoviral IAP repeat containing 5	chr17	78214186	78225636	1	q25.3	protein_coding
0.0030838	0.161	28.27	14.23	1.99	1568830_at	IRAK3	ENSG00000090376	interleukin 1 receptor associated kinase 3	chr12	66189195	66254622	1	q14.3	protein_coding
0.0026255	0.161	120.77	41.24	2.93	220034_at	IRAK3	ENSG00000090376	interleukin 1 receptor associated kinase 3	chr12	66189195	66254622	1	q14.3	protein_coding
0.0023707	0.161	948.32	79.41	11.94	213975_s_at	LYZ	ENSG00000090382	lysozyme	chr12	69348381	69354234	1	q15	protein_coding
0.0023086	0.161	126.35	14.15	8.93	1555745_a_at	LYZ	ENSG00000090382	lysozyme	chr12	69348381	69354234	1	q15	protein_coding
0.0020395	0.161	119.28	61.98	1.92	207277_at	CD209	ENSG00000090659	CD209 molecule	chr19	7739993	7747564	-1	p13.2	protein_coding
0.0040729	0.161	8.6	49.47	0.17	236034_at	ANGPT2	ENSG00000091879	angiopoietin 2	chr8	6499632	6563409	-1	p23.1	protein_coding
0.0057153	0.165	838.98	419.35	2	200762_at	DPYSL2	ENSG00000092964	dihydropyrimidinase like 2	chr8	26514031	26658178	1	p21.2	protein_coding
0.0059574	0.166	1351.74	405.73	3.33	219505_at	ADA2	ENSG00000093072	adenosine deaminase 2	chr22	17178790	17258235	-1	q11.1	protein_coding
0.0018515	0.161	67.2	132.6	0.51	232705_at	LRRFIP2	ENSG00000093167	LRR binding FLII interacting protein 2	chr3	37052626	37183689	-1	p22.2	protein_coding
0.002867	0.161	104.82	211.88	0.49	232704_s_at	LRRFIP2	ENSG00000093167	LRR binding FLII interacting protein 2	chr3	37052626	37183689	-1	p22.2	protein_coding
0.0020642	0.161	146.6	76	1.93	226199_at	UPRT	ENSG00000094841	uracil phosphoribosyltransferase homolog	chrX	75156388	75304885	1	q13.3	protein_coding
0.0063874	0.169	243.69	367.64	0.66	221887_s_at	WHRN	ENSG00000095397	whirlin	chr9	114402080	114505473	-1	q32	protein_coding
0.0043944	0.161	1546.38	2471.04	0.63	217742_s_at	WAC	ENSG00000095787	WW domain containing adaptor with coiled-coil	chr10	28532493	28623112	1	p12.1	protein_coding
0.0077874	0.175	43.61	76.9	0.57	1560485_at	HIVEP1	ENSG00000095951	HIVEP zinc finger 1	chr6	12008762	12164999	1	p24.1	protein_coding
0.0052394	0.164	660.98	103.68	6.38	219725_at	TREM2	ENSG00000095970	triggering receptor expressed on myeloid cells 2	chr6	41158506	41163186	-1	p21.1	protein_coding
0.0092039	0.18	203.96	71.97	2.83	224856_at	FKBP5	ENSG00000096060	FKBP prolyl isomerase 5	chr6	35573585	35728583	-1	p21.31	protein_coding
0.0084644	0.178	74.63	28.07	2.66	1552584_at	IL12RB1	ENSG00000096996	interleukin 12 receptor subunit beta 1	chr19	18058995	18098944	-1	p13.11	protein_coding
0.003666	0.161	143.37	89.08	1.61	200831_s_at	SCD	ENSG00000099194	stearoyl-CoA desaturase	chr10	100347233	100364826	1	q24.31	protein_coding
0.0046025	0.161	1458.75	957.18	1.52	212370_x_at	WASHC2A	ENSG00000099290	WASH complex subunit 2A	chr10	50067888	50133509	1	q11.23	protein_coding
0.0043613	0.161	124.98	190.17	0.66	223658_at	KCNK6	ENSG00000099337	potassium two pore domain channel subfamily K member 6	chr19	38319845	38332076	1	q13.2	protein_coding
0.0078128	0.175	127.66	81.42	1.57	204184_s_at	GRK3	ENSG00000100077	G protein-coupled receptor kinase 3	chr22	25564675	25729294	1	q12.1	protein_coding
0.0050932	0.162	313.01	198.39	1.58	202807_s_at	TOM1	ENSG00000100284	target of myb1 membrane trafficking protein	chr22	35299275	35347992	1	q12.3	protein_coding
0.0015146	0.161	3235.1	851.2	3.8	203665_at	HMOX1	ENSG00000100292	heme oxygenase 1	chr22	35380361	35394214	1	q12.3	protein_coding
0.008869	0.18	183.82	94.39	1.95	204443_at	ARSA	ENSG00000100299	arylsulfatase A	chr22	50622754	50628173	-1	q13.33	protein_coding
0.0058158	0.165	2585.45	1326.63	1.95	202096_s_at	TSPO	ENSG00000100300	translocator protein	chr22	43151547	43163242	1	q13.2	protein_coding
0.0098525	0.181	234.1	345.62	0.68	206169_x_at	ZC3H7B	ENSG00000100403	zinc finger CCCH-type containing 7B	chr22	41301525	41360147	1	q13.2	protein_coding
0.0087102	0.178	420.11	246.25	1.71	202990_at	PYGL	ENSG00000100504	glycogen phosphorylase L	chr14	50857891	50944483	-1	q22.1	protein_coding
0.0010664	0.161	499.05	153.73	3.25	209714_s_at	CDKN3	ENSG00000100526	cyclin dependent kinase inhibitor 3	chr14	54396849	54420218	1	q22.2	protein_coding
0.0052566	0.164	428.14	150.57	2.84	1555758_a_at	CDKN3	ENSG00000100526	cyclin dependent kinase inhibitor 3	chr14	54396849	54420218	1	q22.2	protein_coding
0.0040741	0.161	195.1	105.8	1.84	225926_at	VTI1B	ENSG00000100568	vesicle transport through interaction with t-SNAREs 1B	chr14	67647085	67674820	-1	q24.1	protein_coding
0.000817	0.161	330.51	121.07	2.73	60471_at	RIN3	ENSG00000100599	Ras and Rab interactor 3	chr14	92513781	92688994	1	q32.12	protein_coding
0.0093311	0.18	176.21	75.59	2.33	219457_s_at	RIN3	ENSG00000100599	Ras and Rab interactor 3	chr14	92513781	92688994	1	q32.12	protein_coding
0.0002189	0.12	155.61	553.06	0.28	229796_at	SIX4	ENSG00000100625	SIX homeobox 4	chr14	60709539	60724351	-1	q23.1	protein_coding
0.0093112	0.18	42.26	67.07	0.63	224484_s_at	BRMS1L	ENSG00000100916	BRMS1 like transcriptional repressor	chr14	35826338	35932325	1	q13.2	protein_coding
0.0008404	0.161	424.83	105.91	4.01	203650_at	PROCR	ENSG00000101000	protein C receptor	chr20	35172072	35216240	1	q11.22	protein_coding
0.0073706	0.172	121.26	229.04	0.53	231838_at	PABPC1L	ENSG00000101104	poly(A) binding protein cytoplasmic 1 like	chr20	44910060	44959035	1	q13.12	protein_coding
0.0062294	0.169	987.31	281.43	3.51	210042_s_at	CTSZ	ENSG00000101160	cathepsin Z	chr20	58985686	59008238	-1	q13.32	protein_coding
0.0014355	0.161	291.19	487.23	0.6	213213_at	DIDO1	ENSG00000101191	death inducer-obliterator 1	chr20	62877738	62937952	-1	q13.33	protein_coding
0.0022865	0.161	982.78	535.29	1.84	201853_s_at	CDC25B	ENSG00000101224	cell division cycle 25B	chr20	3786772	3806121	1	p13	protein_coding
0.0085791	0.178	135.5	69.71	1.94	203185_at	RASSF2	ENSG00000101265	Ras association domain family member 2	chr20	4780023	4823608	-1	p13	protein_coding
0.0083255	0.178	500.99	1129.18	0.44	216268_s_at	JAG1	ENSG00000101384	jagged canonical Notch ligand 1	chr20	10637684	10673999	-1	p12.2	protein_coding
0.0046941	0.161	364.28	140.78	2.59	225687_at	FAM83D	ENSG00000101447	family with sequence similarity 83 member D	chr20	38926312	38953106	1	q11.23	protein_coding
0.008443	0.178	35.12	68.98	0.51	238966_at	CELF4	ENSG00000101489	CUGBP Elav-like family member 4	chr18	37243040	37565827	-1	q12.2	protein_coding
0.0056822	0.165	97.9	173.47	0.56	223654_s_at	CELF4	ENSG00000101489	CUGBP Elav-like family member 4	chr18	37243040	37565827	-1	q12.2	protein_coding
0.0041574	0.161	606.95	333.94	1.82	225198_at	VAPA	ENSG00000101558	VAMP associated protein A	chr18	9914016	9960021	1	p11.22	protein_coding
0.000773	0.161	24.79	124.6	0.2	219181_at	LIPG	ENSG00000101670	lipase G, endothelial type	chr18	49560699	49599185	1	q21.1	protein_coding
0.0042487	0.161	71.15	15.08	4.72	229560_at	TLR8	ENSG00000101916	toll like receptor 8	chrX	12906620	12923169	1	p22.2	protein_coding
0.0082838	0.178	14483.7	8618.32	1.68	201666_at	TIMP1	ENSG00000102265	TIMP metallopeptidase inhibitor 1	chrX	47582408	47586789	1	p11.3	protein_coding
0.0099516	0.181	1263.33	2755.13	0.46	209212_s_at	KLF5	ENSG00000102554	Kruppel like factor 5	chr13	73054976	73077541	1	q22.1	protein_coding
0.0017384	0.161	498.23	178.01	2.8	204638_at	ACP5	ENSG00000102575	acid phosphatase 5, tartrate resistant	chr19	11574660	11579008	-1	p13.2	protein_coding
0.0066473	0.169	22.12	84.37	0.26	222033_s_at	FLT1	ENSG00000102755	fms related receptor tyrosine kinase 1	chr13	28300346	28495145	-1	q12.3	protein_coding
0.0049294	0.161	23.24	105.35	0.22	226498_at	FLT1	ENSG00000102755	fms related receptor tyrosine kinase 1	chr13	28300346	28495145	-1	q12.3	protein_coding
0.0079713	0.176	614.64	230.45	2.67	209083_at	CORO1A	ENSG00000102879	coronin 1A	chr16	30182827	30189076	1	p11.2	protein_coding
0.0042261	0.161	164.09	317.19	0.52	215092_s_at	NFAT5	ENSG00000102908	nuclear factor of activated T cells 5	chr16	69565094	69704666	1	q22.1	protein_coding
0.0072973	0.172	176.27	365.67	0.48	208003_s_at	NFAT5	ENSG00000102908	nuclear factor of activated T cells 5	chr16	69565094	69704666	1	q22.1	protein_coding
0.0014958	0.161	585.72	1126.69	0.52	224984_at	NFAT5	ENSG00000102908	nuclear factor of activated T cells 5	chr16	69565094	69704666	1	q22.1	protein_coding
0.0034001	0.161	59.73	98.28	0.61	219751_at	SETD6	ENSG00000103037	SET domain containing 6, protein lysine methyltransferase	chr16	58515479	58523842	1	q21	protein_coding
0.0095105	0.18	356.64	554.71	0.64	218505_at	WDR59	ENSG00000103091	WD repeat domain 59	chr16	74871362	75000173	-1	q23.1	protein_coding
0.0042463	0.161	190.44	81.28	2.34	205090_s_at	NAGPA	ENSG00000103174	N-acetylglucosamine-1-phosphodiester alpha-N-acetylglucosaminidase	chr16	5024844	5034141	-1	p13.3	protein_coding
0.0046388	0.161	10.52	36.31	0.29	219478_at	WFDC1	ENSG00000103175	WAP four-disulfide core domain 1	chr16	84294846	84329844	1	q24.1	protein_coding
0.0076445	0.175	776.15	233.78	3.32	224583_at	COTL1	ENSG00000103187	coactosin like F-actin binding protein 1	chr16	84565596	84618078	-1	q24.1	protein_coding
0.0054078	0.164	169.75	355.46	0.48	242922_at	NOMO3	ENSG00000103226	NODAL modulator 3	chr16	16232506	16300806	1	p13.11	protein_coding
0.0022778	0.161	337.8	187.23	1.8	208914_at	GGA2	ENSG00000103365	golgi associated, gamma adaptin ear containing, ARF binding protein 2	chr16	23463542	23521995	-1	p12.2	protein_coding
0.0070539	0.171	213.81	124.17	1.72	239135_at	CPPED1	ENSG00000103381	calcineurin like phosphoesterase domain containing 1	chr16	12659799	12803887	-1	p13.12	protein_coding
0.0029516	0.161	198.88	395.04	0.5	226035_at	USP31	ENSG00000103404	ubiquitin specific peptidase 31	chr16	23061406	23149452	-1	p12.2	protein_coding
0.0049896	0.162	164.99	302.64	0.55	226033_at	USP31	ENSG00000103404	ubiquitin specific peptidase 31	chr16	23061406	23149452	-1	p12.2	protein_coding
0.0012208	0.161	113.28	230.9	0.49	227256_at	USP31	ENSG00000103404	ubiquitin specific peptidase 31	chr16	23061406	23149452	-1	p12.2	protein_coding
0.0016694	0.161	745.57	209.63	3.56	221666_s_at	PYCARD	ENSG00000103490	PYD and CARD domain containing	chr16	31201486	31203450	-1	p11.2	protein_coding
0.0050867	0.162	329.81	202.75	1.63	202030_at	BCKDK	ENSG00000103507	branched chain keto acid dehydrogenase kinase	chr16	31106107	31112791	1	p11.2	protein_coding
0.0074149	0.173	394.73	229.58	1.72	203173_s_at	VPS35L	ENSG00000103544	VPS35 endosomal protein sorting factor like	chr16	19555240	19706793	1	p12.3	protein_coding
0.0093345	0.18	20.24	39.91	0.51	1556097_at	HOMER2	ENSG00000103942	homer scaffold protein 2	chr15	82836946	82986153	-1	q25.2	protein_coding
0.0001198	0.12	254.03	72.85	3.49	212820_at	DMXL2	ENSG00000104093	Dmx like 2	chr15	51447711	51622833	-1	q21.2	protein_coding
0.0090189	0.18	280.65	181.19	1.55	223346_at	VPS18	ENSG00000104142	VPS18 core subunit of CORVET and HOPS complexes	chr15	40894450	40903975	1	q15.1	protein_coding
0.0080128	0.176	802.39	517.56	1.55	202907_s_at	NBN	ENSG00000104320	nibrin	chr8	89933331	90003228	-1	q21.3	protein_coding
0.0022096	0.161	600.9	1179.55	0.51	213577_at	SQLE	ENSG00000104549	squalene epoxidase	chr8	124998497	125022283	1	q24.13	protein_coding
0.0086521	0.178	577.09	1148.43	0.5	209218_at	SQLE	ENSG00000104549	squalene epoxidase	chr8	124998497	125022283	1	q24.13	protein_coding
0.0040622	0.161	497.35	301.74	1.65	202595_s_at	LEPROTL1	ENSG00000104660	leptin receptor overlapping transcript like 1	chr8	30095408	30177208	1	p12	protein_coding
0.0037649	0.161	707.1	460.14	1.54	202594_at	LEPROTL1	ENSG00000104660	leptin receptor overlapping transcript like 1	chr8	30095408	30177208	1	p12	protein_coding
0.0066745	0.17	205.94	133.43	1.54	212866_at	R3HCC1	ENSG00000104679	R3H domain and coiled-coil containing 1	chr8	23270120	23296279	1	p21.3	protein_coding
0.0090039	0.18	284.33	616.24	0.46	231775_at	TNFRSF10A	ENSG00000104689	TNF receptor superfamily member 10a	chr8	23190452	23225102	-1	p21.3	protein_coding
0.0098364	0.181	145.87	265.56	0.55	232171_x_at	KLHDC4	ENSG00000104731	kelch domain containing 4	chr16	87696485	87765992	-1	q24.2	protein_coding
0.0079012	0.176	1346.24	728.52	1.85	213702_x_at	ASAH1	ENSG00000104763	N-acylsphingosine amidohydrolase 1	chr8	18055992	18084998	-1	p22	protein_coding
0.0015813	0.161	1076.39	332.65	3.24	1555419_a_at	ASAH1	ENSG00000104763	N-acylsphingosine amidohydrolase 1	chr8	18055992	18084998	-1	p22	protein_coding
0.0036482	0.161	503.06	268.52	1.87	210980_s_at	ASAH1	ENSG00000104763	N-acylsphingosine amidohydrolase 1	chr8	18055992	18084998	-1	p22	protein_coding
0.0065422	0.169	1538.49	918.78	1.67	221479_s_at	BNIP3L	ENSG00000104765	BCL2 interacting protein 3 like	chr8	26383054	26505636	1	p21.2	protein_coding
0.0046505	0.161	65	15.99	4.07	204192_at	CD37	ENSG00000104894	CD37 molecule	chr19	49335171	49343335	1	q13.33	protein_coding
0.0094403	0.18	231.39	363.18	0.64	226156_at	AKT2	ENSG00000105221	AKT serine/threonine kinase 2	chr19	40230317	40285536	-1	q13.2	protein_coding
0.0021696	0.161	791.53	326.75	2.42	201050_at	PLD3	ENSG00000105223	phospholipase D family member 3	chr19	40348456	40380439	1	q13.2	protein_coding
0.0050302	0.162	133.46	45.98	2.9	213915_at	NKG7	ENSG00000105374	natural killer cell granule protein 7	chr19	51371606	51372701	-1	q13.41	protein_coding
0.0005552	0.142	93.19	174.99	0.53	219011_at	PLEKHA4	ENSG00000105559	pleckstrin homology domain containing A4	chr19	48837097	48868617	-1	q13.33	protein_coding
0.0067374	0.17	463.58	197.16	2.35	203695_s_at	GSDME	ENSG00000105928	gasdermin E	chr7	24698355	24757940	-1	p15.3	protein_coding
0.0086831	0.178	260.56	144.8	1.8	212206_s_at	H2AZ2	ENSG00000105968	H2A.Z variant histone 2	chr7	44826791	44848087	-1	p13	protein_coding
0.002091	0.161	266.22	132.54	2.01	228762_at	LFNG	ENSG00000106003	LFNG O-fucosylpeptide 3-beta-N-acetylglucosaminyltransferase	chr7	2512529	2529177	1	p22.3	protein_coding
1.56e-05	0.12	387.1	60.42	6.41	208146_s_at	CPVL	ENSG00000106066	carboxypeptidase vitellogenic like	chr7	28995235	29195451	-1	p14.3	protein_coding
0.0024389	0.161	123.78	194.85	0.64	204729_s_at	STX1A	ENSG00000106089	syntaxin 1A	chr7	73699206	73719672	-1	q11.23	protein_coding
0.0044053	0.161	360.86	687.19	0.53	205809_s_at	WASL	ENSG00000106299	WASP like actin nucleation promoting factor	chr7	123681943	123749003	-1	q31.32	protein_coding
0.0042918	0.161	18.51	30.94	0.6	228982_s_at	USP42	ENSG00000106346	ubiquitin specific peptidase 42	chr7	6104949	6161564	1	p22.1	protein_coding
0.0044347	0.161	161.37	267.08	0.6	226176_s_at	USP42	ENSG00000106346	ubiquitin specific peptidase 42	chr7	6104949	6161564	1	p22.1	protein_coding
0.0051549	0.163	36.52	69.86	0.52	1554618_at	AGFG2	ENSG00000106351	ArfGAP with FG repeats 2	chr7	100539203	100568220	1	q22.1	protein_coding
0.0059214	0.166	117.93	172.81	0.68	204651_at	NRF1	ENSG00000106459	nuclear respiratory factor 1	chr7	129611720	129757082	1	q32.2	protein_coding
0.009511	0.18	30.08	124.15	0.24	204051_s_at	SFRP4	ENSG00000106483	secreted frizzled related protein 4	chr7	37905932	38025695	-1	p14.1	protein_coding
0.0041008	0.161	640.4	401.71	1.59	212798_s_at	ANKMY2	ENSG00000106524	ankyrin repeat and MYND domain containing 2	chr7	16599779	16645817	-1	p21.1	protein_coding
0.003281	0.161	51.48	19.53	2.64	232024_at	GIMAP2	ENSG00000106560	GTPase, IMAP family member 2	chr7	150685697	150693641	1	q36.1	protein_coding
0.0016569	0.161	670.09	157.26	4.26	220532_s_at	TMEM176B	ENSG00000106565	transmembrane protein 176B	chr7	150791285	150801360	-1	q36.1	protein_coding
0.0071548	0.171	472.76	677.26	0.7	218601_at	URGCP	ENSG00000106608	upregulator of cell proliferation	chr7	43875894	43926411	-1	p13	protein_coding
0.0081958	0.177	84.31	19.56	4.31	235735_at	TNFSF8	ENSG00000106952	TNF superfamily member 8	chr9	114893343	114930595	-1	q33.1	protein_coding
0.0048527	0.161	21.94	9.85	2.23	232843_s_at	DOCK8	ENSG00000107099	dedicator of cytokinesis 8	chr9	214854	465259	1	p24.3	protein_coding
0.0041695	0.161	318.48	185.17	1.72	203308_x_at	HPS1	ENSG00000107521	HPS1 biogenesis of lysosomal organelles complex 3 subunit 1	chr10	98416198	98446935	-1	q24.2	protein_coding
0.0030477	0.161	145.31	66.55	2.18	210112_at	HPS1	ENSG00000107521	HPS1 biogenesis of lysosomal organelles complex 3 subunit 1	chr10	98416198	98446935	-1	q24.2	protein_coding
0.0003297	0.132	161.58	82.17	1.97	225372_at	VSIR	ENSG00000107738	V-set immunoregulatory receptor	chr10	71747556	71773520	-1	q22.1	protein_coding
4.55e-05	0.12	657.87	239.46	2.75	225373_at	VSIR	ENSG00000107738	V-set immunoregulatory receptor	chr10	71747556	71773520	-1	q22.1	protein_coding
0.0033516	0.161	2916.3	429.5	6.79	201847_at	LIPA	ENSG00000107798	lipase A, lysosomal acid type	chr10	89213569	89414557	-1	q23.31	protein_coding
0.0022172	0.161	280.13	103.51	2.71	217226_s_at	SFXN3	ENSG00000107819	sideroflexin 3	chr10	101031234	101041244	1	q24.31	protein_coding
0.0033718	0.161	603.1	214.63	2.81	220974_x_at	SFXN3	ENSG00000107819	sideroflexin 3	chr10	101031234	101041244	1	q24.31	protein_coding
0.0071164	0.171	149.97	380.28	0.39	244165_at	TASOR2	ENSG00000108021	transcription activation suppressor family member 2	chr10	5684838	5763740	1	p15.1	protein_coding
0.0065653	0.169	375.29	721.38	0.52	218331_s_at	TASOR2	ENSG00000108021	transcription activation suppressor family member 2	chr10	5684838	5763740	1	p15.1	protein_coding
0.00295	0.161	89.33	252.32	0.35	216211_at	TASOR2	ENSG00000108021	transcription activation suppressor family member 2	chr10	5684838	5763740	1	p15.1	protein_coding
0.0030863	0.161	2524.63	1269.63	1.99	212124_at	ZMIZ1	ENSG00000108175	zinc finger MIZ-type containing 1	chr10	79068966	79316519	1	q22.3	protein_coding
0.0081893	0.177	336.61	616.16	0.55	224939_at	NUFIP2	ENSG00000108256	nuclear FMR1 interacting protein 2	chr17	29255839	29294148	-1	q11.2	protein_coding
0.0066227	0.169	384.65	199.15	1.93	201156_s_at	RAB5C	ENSG00000108774	RAB5C, member RAS oncogene family	chr17	42124978	42155044	-1	q21.2	protein_coding
0.0008912	0.161	203.38	98.42	2.07	204360_s_at	NAGLU	ENSG00000108784	N-acetyl-alpha-glucosaminidase	chr17	42536241	42544449	1	q21.2	protein_coding
0.0015742	0.161	2489.6	5043.29	0.49	208835_s_at	LUC7L3	ENSG00000108848	LUC7 like 3 pre-mRNA splicing factor	chr17	50719565	50756219	1	q21.33	protein_coding
0.0042999	0.161	670.32	1597.08	0.42	203804_s_at	LUC7L3	ENSG00000108848	LUC7 like 3 pre-mRNA splicing factor	chr17	50719565	50756219	1	q21.33	protein_coding
0.0026122	0.161	1106.73	2256.54	0.49	220044_x_at	LUC7L3	ENSG00000108848	LUC7 like 3 pre-mRNA splicing factor	chr17	50719565	50756219	1	q21.33	protein_coding
0.0052802	0.164	322.84	140.1	2.3	226804_at	FAM20A	ENSG00000108950	FAM20A golgi associated secretory pathway pseudokinase	chr17	68535113	68601367	-1	q24.2	protein_coding
0.0076107	0.174	363.99	217.72	1.67	201349_at	NHERF1	ENSG00000109062	SLC9A3 regulator 1	chr17	74748628	74769353	1	q25.1	protein_coding
0.0031524	0.161	201.84	54.42	3.71	204534_at	VTN	ENSG00000109072	vitronectin	chr17	28367284	28373091	-1	q11.2	protein_coding
0.0020136	0.161	925.76	378.96	2.44	210139_s_at	PMP22	ENSG00000109099	peripheral myelin protein 22	chr17	15229773	15272292	-1	p12	protein_coding
0.0048306	0.161	330.75	1022.98	0.32	205239_at	AREG	ENSG00000109321	amphiregulin	chr4	74445136	74455005	1	q13.3	protein_coding
0.0083015	0.178	396.47	211.59	1.87	203778_at	MANBA	ENSG00000109323	mannosidase beta	chr4	102630770	102760994	-1	q24	protein_coding
0.0061432	0.169	174.8	104.72	1.67	218662_s_at	NCAPG	ENSG00000109805	non-SMC condensin I complex subunit G	chr4	17810979	17844865	1	p15.31	protein_coding
0.0099789	0.181	69.67	37.21	1.87	218663_at	NCAPG	ENSG00000109805	non-SMC condensin I complex subunit G	chr4	17810979	17844865	1	p15.31	protein_coding
0.0033906	0.161	955.91	289.06	3.31	201487_at	CTSC	ENSG00000109861	cathepsin C	chr11	88265069	88359684	-1	q14.2	protein_coding
0.006142	0.169	346.97	221.47	1.57	222403_at	MTCH2	ENSG00000109919	mitochondrial carrier 2	chr11	47617315	47642607	-1	p11.2	protein_coding
0.0020506	0.161	467.73	925.53	0.51	212232_at	FNBP4	ENSG00000109920	formin binding protein 4	chr11	47716494	47767443	-1	p11.2	protein_coding
0.0011592	0.161	114.8	334.21	0.34	229272_at	FNBP4	ENSG00000109920	formin binding protein 4	chr11	47716494	47767443	-1	p11.2	protein_coding
0.0099443	0.181	613.77	933.41	0.66	211423_s_at	SC5D	ENSG00000109929	sterol-C5-desaturase	chr11	121292681	121313410	1	q23.3	protein_coding
0.0084919	0.178	348.33	147.06	2.37	216250_s_at	LPXN	ENSG00000110031	leupaxin	chr11	58526871	58578220	-1	q12.1	protein_coding
0.0032761	0.161	1008.98	128.92	7.83	223922_x_at	MS4A6A	ENSG00000110077	membrane spanning 4-domains A6A	chr11	60172015	60184666	-1	q12.2	protein_coding
0.0002589	0.132	1330.88	83.83	15.88	224356_x_at	MS4A6A	ENSG00000110077	membrane spanning 4-domains A6A	chr11	60172015	60184666	-1	q12.2	protein_coding
0.0013952	0.161	1167.04	97.82	11.93	223280_x_at	MS4A6A	ENSG00000110077	membrane spanning 4-domains A6A	chr11	60172015	60184666	-1	q12.2	protein_coding
0.0010416	0.161	460.42	47.66	9.66	219666_at	MS4A6A	ENSG00000110077	membrane spanning 4-domains A6A	chr11	60172015	60184666	-1	q12.2	protein_coding
0.0023342	0.161	302.17	31.41	9.62	1555728_a_at	MS4A4A	ENSG00000110079	membrane spanning 4-domains A4A	chr11	60185657	60318080	1	q12.2	protein_coding
0.0001757	0.12	514.79	31.25	16.47	219607_s_at	MS4A4A	ENSG00000110079	membrane spanning 4-domains A4A	chr11	60185657	60318080	1	q12.2	protein_coding
0.0066552	0.169	507.86	325.26	1.56	204218_at	ANAPC15	ENSG00000110200	anaphase promoting complex subunit 15	chr11	72106378	72112780	-1	q13.4	protein_coding
0.0016234	0.161	345.53	170.22	2.03	226106_at	RNF141	ENSG00000110315	ring finger protein 141	chr11	10511673	10541230	-1	p15.4	protein_coding
0.0069258	0.171	104.37	46.38	2.25	219104_at	RNF141	ENSG00000110315	ring finger protein 141	chr11	10511673	10541230	-1	p15.4	protein_coding
0.0035353	0.161	430.14	79.01	5.44	204912_at	IL10RA	ENSG00000110324	interleukin 10 receptor subunit alpha	chr11	117986370	118003037	1	q23.3	protein_coding
0.0083528	0.178	483.14	235.36	2.05	218072_at	COMMD9	ENSG00000110442	COMM domain containing 9	chr11	36269284	36289449	-1	p13	protein_coding
0.0079476	0.176	287.04	183.26	1.57	228264_at	ACCS	ENSG00000110455	1-aminocyclopropane-1-carboxylate synthase homolog (inactive)	chr11	44065925	44084237	1	p11.2	protein_coding
0.0059189	0.166	62.71	36.21	1.73	209334_s_at	PSMD9	ENSG00000110801	proteasome 26S subunit, non-ATPase 9	chr12	121888732	121918297	1	q24.31	protein_coding
0.0066232	0.169	110.38	24.99	4.42	219191_s_at	BIN2	ENSG00000110934	bridging integrator 2	chr12	51281038	51324668	-1	q13.13	protein_coding
0.003266	0.161	260.92	139.36	1.87	202580_x_at	FOXM1	ENSG00000111206	forkhead box M1	chr12	2857680	2877174	-1	p13.33	protein_coding
0.0049262	0.161	26.56	15.37	1.73	220315_at	PARP11	ENSG00000111224	poly(ADP-ribose) polymerase family member 11	chr12	3791047	3873448	-1	p13.32	protein_coding
0.0015433	0.161	411.08	797.47	0.52	224832_at	DUSP16	ENSG00000111266	dual specificity phosphatase 16	chr12	12473282	12562863	-1	p13.2	protein_coding
0.0048133	0.161	34.26	58.15	0.59	1563505_at	DUSP16	ENSG00000111266	dual specificity phosphatase 16	chr12	12473282	12562863	-1	p13.2	protein_coding
0.0026116	0.161	836.41	509.74	1.64	201989_s_at	CREBL2	ENSG00000111269	cAMP responsive element binding protein like 2	chr12	12611827	12645108	1	p13.1	protein_coding
0.007031	0.171	94.35	57.98	1.63	201988_s_at	CREBL2	ENSG00000111269	cAMP responsive element binding protein like 2	chr12	12611827	12645108	1	p13.1	protein_coding
0.0011366	0.161	221.36	110.86	2	201990_s_at	CREBL2	ENSG00000111269	cAMP responsive element binding protein like 2	chr12	12611827	12645108	1	p13.1	protein_coding
2.76e-05	0.12	379.65	102.16	3.72	1555812_a_at	ARHGDIB	ENSG00000111348	Rho GDP dissociation inhibitor beta	chr12	14942031	14961728	-1	p12.3	protein_coding
0.0004274	0.14	1312.6	327.53	4.01	201288_at	ARHGDIB	ENSG00000111348	Rho GDP dissociation inhibitor beta	chr12	14942031	14961728	-1	p12.3	protein_coding
0.0030299	0.161	107.48	23.1	4.65	232267_at	ADGRD1	ENSG00000111452	adhesion G protein-coupled receptor D1	chr12	130953907	131141469	1	q24.33	protein_coding
0.0054795	0.165	116.71	32.68	3.57	210354_at	IFNG	ENSG00000111537	interferon gamma	chr12	68154768	68159740	-1	q15	protein_coding
0.0056601	0.165	426.61	238.31	1.79	223307_at	CDCA3	ENSG00000111665	cell division cycle associated 3	chr12	6844793	6851292	-1	p13.31	protein_coding
0.0043314	0.161	96.47	37.48	2.57	221724_s_at	CLEC4A	ENSG00000111729	C-type lectin domain family 4 member A	chr12	8123617	8138607	1	p13.31	protein_coding
0.0099207	0.181	77.43	33.77	2.29	219947_at	CLEC4A	ENSG00000111729	C-type lectin domain family 4 member A	chr12	8123617	8138607	1	p13.31	protein_coding
3.02e-05	0.12	140.31	34.55	4.06	214470_at	KLRB1	ENSG00000111796	killer cell lectin like receptor B1	chr12	9594551	9607916	-1	p13.31	protein_coding
0.0066236	0.169	94.48	246.12	0.38	230788_at	GCNT2	ENSG00000111846	glucosaminyl (N-acetyl) transferase 2 (I blood group)	chr6	10492223	10629368	1	p24.3	protein_coding
0.0016841	0.161	470.06	236.92	1.98	208673_s_at	SRSF3	ENSG00000112081	serine and arginine rich splicing factor 3	chr6	36594353	36605600	1	p21.31	protein_coding
0.0051688	0.163	143.19	50.58	2.83	213638_at	PHACTR1	ENSG00000112137	phosphatase and actin regulator 1	chr6	12716312	13290446	1	p24.1	protein_coding
0.0012421	0.161	174.36	63.76	2.73	232045_at	PHACTR1	ENSG00000112137	phosphatase and actin regulator 1	chr6	12716312	13290446	1	p24.1	protein_coding
0.0010785	0.161	234.67	88.23	2.66	226397_s_at	PHACTR1	ENSG00000112137	phosphatase and actin regulator 1	chr6	12716312	13290446	1	p24.1	protein_coding
0.0001469	0.12	1285.52	636.72	2.02	204440_at	CD83	ENSG00000112149	CD83 molecule	chr6	14117256	14136918	1	p23	protein_coding
0.0092262	0.18	519.22	306.31	1.7	204565_at	ACOT13	ENSG00000112304	acyl-CoA thioesterase 13	chr6	24667035	24705065	1	p22.3	protein_coding
0.0044688	0.161	165.47	93.16	1.78	1554036_at	ZBTB24	ENSG00000112365	zinc finger and BTB domain containing 24	chr6	109462594	109483219	-1	q21	protein_coding
0.0069009	0.17	323.91	489.21	0.66	202401_s_at	SRF	ENSG00000112658	serum response factor	chr6	43171269	43181506	1	p21.1	protein_coding
0.0042012	0.161	249.44	458.46	0.54	202127_at	PRPF4B	ENSG00000112739	pre-mRNA processing factor 4B	chr6	4021267	4064983	1	p25.2	protein_coding
0.0010776	0.161	443.9	52.02	8.53	205859_at	LY86	ENSG00000112799	lymphocyte antigen 86	chr6	6588108	6654983	1	p25.1	protein_coding
0.0053447	0.164	292.02	78.79	3.71	218755_at	KIF20A	ENSG00000112984	kinesin family member 20A	chr5	138178719	138187723	1	q31.2	protein_coding
0.0050703	0.162	650.51	413.19	1.57	212108_at	FAF2	ENSG00000113194	Fas associated factor family member 2	chr5	176447628	176510074	1	q35.2	protein_coding
0.0026666	0.161	1113.88	410.13	2.72	217865_at	RNF130	ENSG00000113269	ring finger protein 130	chr5	179911651	180072113	-1	q35.3	protein_coding
0.0034761	0.161	49.29	21.11	2.34	206129_s_at	ARSB	ENSG00000113273	arylsulfatase B	chr5	78777209	78986087	-1	q14.1	protein_coding
0.0063362	0.169	405.7	156.76	2.59	214500_at	MACROH2A1	ENSG00000113648	macroH2A.1 histone	chr5	135334381	135399914	-1	q31.1	protein_coding
0.0077683	0.175	2651.56	1741.57	1.52	214501_s_at	MACROH2A1	ENSG00000113648	macroH2A.1 histone	chr5	135334381	135399914	-1	q31.1	protein_coding
0.0057968	0.165	5827.77	3395.56	1.72	200096_s_at	ATP6V0E1	ENSG00000113732	ATPase H+ transporting V0 subunit e1	chr5	172983771	173035445	1	q35.1	protein_coding
0.0060058	0.167	6783.53	3763.87	1.8	201172_x_at	ATP6V0E1	ENSG00000113732	ATPase H+ transporting V0 subunit e1	chr5	172983771	173035445	1	q35.1	protein_coding
0.0051973	0.163	352.12	1010.12	0.35	228758_at	BCL6	ENSG00000113916	BCL6 transcription repressor	chr3	187721377	187745725	-1	q27.3	protein_coding
0.0088759	0.18	280.06	71.79	3.9	205685_at	CD86	ENSG00000114013	CD86 molecule	chr3	122055362	122121139	1	q13.33	protein_coding
0.0053573	0.164	376.11	41.02	9.17	210895_s_at	CD86	ENSG00000114013	CD86 molecule	chr3	122055362	122121139	1	q13.33	protein_coding
0.0062556	0.169	118.2	172.59	0.68	202057_at	KPNA1	ENSG00000114030	karyopherin subunit alpha 1	chr3	122421902	122514945	-1	q21.1	protein_coding
0.0062594	0.169	691.91	1046.24	0.66	202059_s_at	KPNA1	ENSG00000114030	karyopherin subunit alpha 1	chr3	122421902	122514945	-1	q21.1	protein_coding
0.0035039	0.161	38.45	78.88	0.49	1555785_a_at	XRN1	ENSG00000114127	5'-3' exoribonuclease 1	chr3	142306607	142448062	-1	q23	protein_coding
0.0091155	0.18	54.25	12.57	4.32	205433_at	BCHE	ENSG00000114200	butyrylcholinesterase	chr3	165772904	165837462	-1	q26.1	protein_coding
0.0046583	0.161	410.63	233.04	1.76	228499_at	PFKFB4	ENSG00000114268	6-phosphofructo-2-kinase/fructose-2,6-biphosphatase 4	chr3	48517684	48562015	-1	p21.31	protein_coding
0.0065503	0.169	344.07	189.98	1.81	209665_at	CYB561D2	ENSG00000114395	cytochrome b561 family member D2	chr3	50350845	50358460	1	p21.31	protein_coding
0.0091504	0.18	48.56	108.56	0.45	223961_s_at	CISH	ENSG00000114737	cytokine inducible SH2 containing protein	chr3	50606489	50611774	-1	p21.2	protein_coding
0.0065114	0.169	181.06	56.53	3.2	209606_at	CYTIP	ENSG00000115165	cytohesin 1 interacting protein	chr2	157414619	157488961	-1	q24.1	protein_coding
0.0016292	0.161	187.34	118.48	1.58	218838_s_at	TTC31	ENSG00000115282	tetratricopeptide repeat domain 31	chr2	74483073	74494559	1	p13.1	protein_coding
0.0028774	0.161	95.66	40.08	2.39	225045_at	CCDC88A	ENSG00000115355	coiled-coil domain containing 88A	chr2	55287842	55419895	-1	p16.1	protein_coding
0.0065051	0.169	202.52	89.21	2.27	219387_at	CCDC88A	ENSG00000115355	coiled-coil domain containing 88A	chr2	55287842	55419895	-1	p16.1	protein_coding
0.0016617	0.161	67.2	22.3	3.01	221078_s_at	CCDC88A	ENSG00000115355	coiled-coil domain containing 88A	chr2	55287842	55419895	-1	p16.1	protein_coding
0.0098837	0.181	268.65	437.97	0.61	224721_at	WDR75	ENSG00000115368	WD repeat domain 75	chr2	189441446	189475552	1	q32.2	protein_coding
3.64e-05	0.12	10480	4246.79	2.47	210495_x_at	FN1	ENSG00000115414	fibronectin 1	chr2	215360440	215436073	-1	q35	protein_coding
9.06e-05	0.12	10367.2	4128.58	2.51	216442_x_at	FN1	ENSG00000115414	fibronectin 1	chr2	215360440	215436073	-1	q35	protein_coding
0.000147	0.12	9742.15	4129.01	2.36	211719_x_at	FN1	ENSG00000115414	fibronectin 1	chr2	215360440	215436073	-1	q35	protein_coding
0.0001388	0.12	6501.17	2393.25	2.72	212464_s_at	FN1	ENSG00000115414	fibronectin 1	chr2	215360440	215436073	-1	q35	protein_coding
0.0095451	0.18	297.17	516.64	0.58	233595_at	USP34	ENSG00000115464	ubiquitin specific peptidase 34	chr2	61187463	61471087	-1	p15	protein_coding
0.0016491	0.161	338.85	64.9	5.22	203217_s_at	ST3GAL5	ENSG00000115525	ST3 beta-galactoside alpha-2,3-sialyltransferase 5	chr2	85837120	85905199	-1	p11.2	protein_coding
0.0029244	0.161	388.42	720.22	0.54	212780_at	SOS1	ENSG00000115904	SOS Ras/Rac guanine nucleotide exchange factor 1	chr2	38962206	39124345	-1	p22.1	protein_coding
0.0068368	0.17	57.08	26.25	2.17	202663_at	WIPF1	ENSG00000115935	WAS/WASL interacting protein family member 1	chr2	174559572	174682916	-1	q31.1	protein_coding
0.0003823	0.137	78.31	25.29	3.1	202664_at	WIPF1	ENSG00000115935	WAS/WASL interacting protein family member 1	chr2	174559572	174682916	-1	q31.1	protein_coding
0.0060737	0.168	162.95	44.71	3.64	231182_at	WIPF1	ENSG00000115935	WAS/WASL interacting protein family member 1	chr2	174559572	174682916	-1	q31.1	protein_coding
0.0092144	0.18	105.47	40.18	2.63	202665_s_at	WIPF1	ENSG00000115935	WAS/WASL interacting protein family member 1	chr2	174559572	174682916	-1	q31.1	protein_coding
0.0031929	0.161	559.13	89.28	6.26	203470_s_at	PLEK	ENSG00000115956	pleckstrin	chr2	68365282	68397453	1	p14	protein_coding
0.0037517	0.161	371.02	53.24	6.97	203471_s_at	PLEK	ENSG00000115956	pleckstrin	chr2	68365282	68397453	1	p14	protein_coding
0.007136	0.171	62.44	220.75	0.28	226695_at	PRRX1	ENSG00000116132	paired related homeobox 1	chr1	170662728	170739421	1	q24.2	protein_coding
0.0095641	0.18	60.02	83.03	0.72	236382_at	WRAP73	ENSG00000116213	WD repeat containing, antisense to TP73	chr1	3630767	3652761	-1	p36.32	protein_coding
0.0087074	0.178	1370.87	2266.23	0.6	222667_s_at	ASH1L	ENSG00000116539	ASH1 like histone lysine methyltransferase	chr1	155335268	155563162	-1	q22	protein_coding
0.0040887	0.161	1177.95	571.73	2.06	223168_at	RHOU	ENSG00000116574	ras homolog family member U	chr1	228735479	228746664	1	q42.13	protein_coding
0.0082798	0.178	518.93	1115.43	0.47	206245_s_at	IVNS1ABP	ENSG00000116679	influenza virus NS1A binding protein	chr1	185296388	185317273	-1	q25.3	protein_coding
0.00228	0.161	2466.34	5798.63	0.43	203725_at	GADD45A	ENSG00000116717	growth arrest and DNA damage inducible alpha	chr1	67685201	67688334	1	p31.3	protein_coding
0.0091718	0.18	88.6	180.24	0.49	205277_at	PRDM2	ENSG00000116731	PR/SET domain 2	chr1	13700188	13825079	1	p36.21	protein_coding
0.0074612	0.173	53.75	22.63	2.37	205831_at	CD2	ENSG00000116824	CD2 molecule	chr1	116754430	116769229	1	p13.1	protein_coding
0.0085325	0.178	483.75	303.71	1.59	202870_s_at	CDC20	ENSG00000117399	cell division cycle 20	chr1	43358981	43363203	1	p34.2	protein_coding
0.0098965	0.181	756.24	1342.54	0.56	209007_s_at	RSRP1	ENSG00000117616	arginine and serine rich protein 1	chr1	25242249	25338213	-1	p36.11	protein_coding
0.0049593	0.161	1418.95	465.11	3.05	200766_at	CTSD	ENSG00000117984	cathepsin D	chr11	1752752	1764573	-1	p15.5	protein_coding
0.0041083	0.161	50.69	75.96	0.67	232588_at	STAG1	ENSG00000118007	stromal antigen 1	chr3	136336236	136752403	-1	q22.3	protein_coding
0.0092636	0.18	101.91	171.45	0.59	212079_s_at	KMT2A	ENSG00000118058	lysine methyltransferase 2A	chr11	118436456	118526832	1	q23.3	protein_coding
0.0083945	0.178	159.06	254.03	0.63	1565436_s_at	KMT2A	ENSG00000118058	lysine methyltransferase 2A	chr11	118436456	118526832	1	q23.3	protein_coding
0.0080287	0.176	217.82	94.04	2.32	209318_x_at	PLAGL1	ENSG00000118495	PLAG1 like zinc finger 1	chr6	143940300	144064599	-1	q24.2	protein_coding
0.0036329	0.161	94.84	146.5	0.65	227504_s_at	MED28	ENSG00000118579	mediator complex subunit 28	chr4	17614641	17634105	1	p15.32	protein_coding
0.0073529	0.172	65.59	130.82	0.5	227505_at	MED28	ENSG00000118579	mediator complex subunit 28	chr4	17614641	17634105	1	p15.32	protein_coding
0.0038833	0.161	15.77	9.31	1.69	1568574_x_at	SPP1	ENSG00000118785	secreted phosphoprotein 1	chr4	87975667	87983532	1	q22.1	protein_coding
0.0004065	0.139	2479.39	845.69	2.93	218109_s_at	MFSD1	ENSG00000118855	major facilitator superfamily domain containing 1	chr3	158732198	158829719	1	q25.32	protein_coding
0.0085817	0.178	24.66	172.45	0.14	227289_at	PCDH17	ENSG00000118946	protocadherin 17	chr13	57631744	57729311	1	q21.1	protein_coding
0.0098547	0.181	16.83	149.65	0.11	228863_at	PCDH17	ENSG00000118946	protocadherin 17	chr13	57631744	57729311	1	q21.1	protein_coding
0.0043276	0.161	69.69	590.99	0.12	205656_at	PCDH17	ENSG00000118946	protocadherin 17	chr13	57631744	57729311	1	q21.1	protein_coding
0.0029204	0.161	75.76	42.86	1.77	219008_at	LDAH	ENSG00000118961	lipid droplet associated hydrolase	chr2	20684014	20823130	-1	p24.1	protein_coding
0.008514	0.178	185.9	68.52	2.71	200953_s_at	CCND2	ENSG00000118971	cyclin D2	chr12	4269771	4305353	1	p13.32	protein_coding
0.0084207	0.178	613.95	292.49	2.1	212663_at	FKBP15	ENSG00000119321	FKBP prolyl isomerase family member 15	chr9	113161006	113221458	-1	q32	protein_coding
0.0032779	0.161	98.55	59.75	1.65	205642_at	CNTRL	ENSG00000119397	centriolin	chr9	121074660	121177729	1	q33.2	protein_coding
0.0087702	0.178	281.05	156.62	1.79	227212_s_at	PHF19	ENSG00000119403	PHD finger protein 19	chr9	120855651	120894896	-1	q33.2	protein_coding
0.0022162	0.161	207.45	100.82	2.06	223159_s_at	NEK6	ENSG00000119408	NIMA related kinase 6	chr9	124257606	124353307	1	q33.3	protein_coding
0.0089141	0.18	179.03	101.72	1.76	225429_at	PPP6C	ENSG00000119414	protein phosphatase 6 catalytic subunit	chr9	125146573	125189939	-1	q33.3	protein_coding
0.0047093	0.161	129.89	83.79	1.55	1555848_at	RBM18	ENSG00000119446	RNA binding motif protein 18	chr9	122237622	122264840	-1	q33.2	protein_coding
0.0091493	0.18	85.14	59.46	1.43	238963_at	RBM18	ENSG00000119446	RNA binding motif protein 18	chr9	122237622	122264840	-1	q33.2	protein_coding
0.0059455	0.166	353.75	208.24	1.7	223626_x_at	IFI27L2	ENSG00000119632	interferon alpha inducible protein 27 like 2	chr14	94127779	94130253	-1	q32.12	protein_coding
0.0017306	0.161	9714.76	4320.64	2.25	200701_at	NPC2	ENSG00000119655	NPC intracellular cholesterol transporter 2	chr14	74476192	74494177	-1	q24.3	protein_coding
0.0010299	0.161	50.34	129.42	0.39	1553603_s_at	ATL2	ENSG00000119787	atlastin GTPase 2	chr2	38293954	38377285	-1	p22.1	protein_coding
0.0011927	0.161	397.15	813.04	0.49	226188_at	LGALSL	ENSG00000119862	galectin like	chr2	64453969	64461381	1	p14	protein_coding
0.0029951	0.161	315.54	207.56	1.52	226810_at	OGFRL1	ENSG00000119900	opioid growth factor receptor like 1	chr6	71288811	71309059	1	q13	protein_coding
0.0083084	0.178	173.74	112.45	1.54	218970_s_at	CUTC	ENSG00000119929	cutC copper transporter	chr10	99702558	99756134	1	q24.2	protein_coding
0.0043317	0.161	735.29	376.61	1.95	218631_at	AVPI1	ENSG00000119986	arginine vasopressin induced 1	chr10	97677424	97687241	-1	q24.2	protein_coding
0.0054979	0.165	10.91	15.83	0.69	233981_at	RCL1	ENSG00000120158	RNA terminal phosphate cyclase like 1	chr9	4792944	4885917	1	p24.1	protein_coding
0.008133	0.177	86.5	39.77	2.17	238780_s_at	KCNJ5	ENSG00000120457	potassium inwardly rectifying channel subfamily J member 5	chr11	128891356	128921163	1	q24.3	protein_coding
0.0077727	0.175	80.17	155.25	0.52	221208_s_at	MSANTD2	ENSG00000120458	Myb/SANT DNA binding domain containing 2	chr11	124766498	124800706	-1	q24.2	protein_coding
0.0074935	0.173	284.21	463.29	0.61	231807_at	KIAA1217	ENSG00000120549	KIAA1217	chr10	23694746	24547848	1	p12.2	protein_coding
0.0048644	0.161	170.86	333.24	0.51	232762_at	KIAA1217	ENSG00000120549	KIAA1217	chr10	23694746	24547848	1	p12.2	protein_coding
0.0024052	0.161	254.1	450.9	0.56	232046_at	KIAA1217	ENSG00000120549	KIAA1217	chr10	23694746	24547848	1	p12.2	protein_coding
0.0026587	0.161	16.7	28.03	0.6	1562966_at	KIAA1217	ENSG00000120549	KIAA1217	chr10	23694746	24547848	1	p12.2	protein_coding
0.0064816	0.169	49.44	90.37	0.55	1554438_at	KIAA1217	ENSG00000120549	KIAA1217	chr10	23694746	24547848	1	p12.2	protein_coding
0.0029641	0.161	174.67	72.41	2.41	238455_at	PLXDC2	ENSG00000120594	plexin domain containing 2	chr10	19816239	20289856	1	p12.31	protein_coding
0.0060268	0.167	160.76	71.12	2.26	227995_at	PLXDC2	ENSG00000120594	plexin domain containing 2	chr10	19816239	20289856	1	p12.31	protein_coding
0.0024134	0.161	392.77	163.21	2.41	227276_at	PLXDC2	ENSG00000120594	plexin domain containing 2	chr10	19816239	20289856	1	p12.31	protein_coding
0.0003297	0.132	188.48	68.4	2.76	236297_at	PLXDC2	ENSG00000120594	plexin domain containing 2	chr10	19816239	20289856	1	p12.31	protein_coding
0.0042432	0.161	745.57	319.3	2.34	226865_at	PLXDC2	ENSG00000120594	plexin domain containing 2	chr10	19816239	20289856	1	p12.31	protein_coding
0.0065848	0.169	46.2	19.48	2.37	227808_at	DNAJC15	ENSG00000120675	DnaJ heat shock protein family (Hsp40) member C15	chr13	43023203	43114213	1	q14.11	protein_coding
0.0071771	0.171	197.58	102.87	1.92	235573_at	HSPH1	ENSG00000120694	heat shock protein family H (Hsp110) member 1	chr13	31134973	31162388	-1	q12.3	protein_coding
0.0004415	0.14	5080.3	680.38	7.47	201506_at	TGFBI	ENSG00000120708	transforming growth factor beta induced	chr5	136028988	136063818	1	q31.1	protein_coding
0.0044229	0.161	138.98	252.89	0.55	204791_at	NR2C1	ENSG00000120798	nuclear receptor subfamily 2 group C member 1	chr12	95020229	95073628	-1	q22	protein_coding
0.0035771	0.161	605.07	357.38	1.69	218628_at	WASHC3	ENSG00000120860	WASH complex subunit 3	chr12	102012840	102062149	-1	q23.2	protein_coding
0.0090792	0.18	47.11	98.02	0.48	222612_at	PSPC1	ENSG00000121390	paraspeckle component 1	chr13	19674752	19783019	-1	q12.11	protein_coding
0.0095266	0.18	179.22	294.96	0.61	218371_s_at	PSPC1	ENSG00000121390	paraspeckle component 1	chr13	19674752	19783019	-1	q12.11	protein_coding
0.0001664	0.12	675.25	151.79	4.45	204971_at	CSTA	ENSG00000121552	cystatin A	chr3	122325248	122341969	1	q21.1	protein_coding
0.0095505	0.18	72.95	30.64	2.38	214285_at	FABP3	ENSG00000121769	fatty acid binding protein 3	chr1	31365253	31376850	-1	p35.2	protein_coding
0.0020768	0.161	83.8	162.79	0.51	214185_at	KHDRBS1	ENSG00000121774	KH RNA binding domain containing, signal transduction associated 1	chr1	32013868	32060850	1	p35.2	protein_coding
0.0091255	0.18	138.9	54.27	2.56	219697_at	HS3ST2	ENSG00000122254	heparan sulfate-glucosamine 3-sulfotransferase 2	chr16	22814162	22916338	1	p12.2	protein_coding
0.0096338	0.18	57.2	34.34	1.67	235753_at	HOXA7	ENSG00000122592	homeobox A7	chr7	27153716	27157936	-1	p15.2	protein_coding
5.25e-05	0.12	266.62	102.09	2.61	225604_s_at	GLIPR2	ENSG00000122694	GLI pathogenesis related 2	chr9	36136536	36163913	1	p13.3	protein_coding
0.0001253	0.12	559.38	185.08	3.02	225602_at	GLIPR2	ENSG00000122694	GLI pathogenesis related 2	chr9	36136536	36163913	1	p13.3	protein_coding
0.0097726	0.181	59.64	113.94	0.52	215199_at	CALD1	ENSG00000122786	caldesmon 1	chr7	134744252	134970729	1	q33	protein_coding
0.0033629	0.161	8114.09	1323.23	6.13	201858_s_at	SRGN	ENSG00000122862	serglycin	chr10	69088103	69104805	1	q22.1	protein_coding
0.008573	0.178	1455.23	799.34	1.82	207543_s_at	P4HA1	ENSG00000122884	prolyl 4-hydroxylase subunit alpha 1	chr10	73007217	73096974	-1	q22.1	protein_coding
0.0031559	0.161	694.41	377.01	1.84	202910_s_at	ADGRE5	ENSG00000123146	adhesion G protein-coupled receptor E5	chr19	14380501	14408725	1	p13.12	protein_coding
0.00419	0.161	213.51	70	3.05	224451_x_at	ARHGAP9	ENSG00000123329	Rho GTPase activating protein 9	chr12	57472264	57488814	-1	q13.3	protein_coding
0.0020787	0.161	143.4	37.05	3.87	232543_x_at	ARHGAP9	ENSG00000123329	Rho GTPase activating protein 9	chr12	57472264	57488814	-1	q13.3	protein_coding
0.0051282	0.162	95.11	20.52	4.64	238668_at	NCKAP1L	ENSG00000123338	NCK associated protein 1 like	chr12	54497752	54548243	1	q13.13	protein_coding
0.0093726	0.18	320.98	51.62	6.22	209734_at	NCKAP1L	ENSG00000123338	NCK associated protein 1 like	chr12	54497752	54548243	1	q13.13	protein_coding
0.0084144	0.178	797.51	521.48	1.53	218556_at	ORMDL2	ENSG00000123353	ORMDL sphingolipid biosynthesis regulator 2	chr12	55818041	55821879	1	q13.2	protein_coding
0.0095206	0.18	120.22	83.03	1.45	218569_s_at	KBTBD4	ENSG00000123444	kelch repeat and BTB domain containing 4	chr11	47572197	47578976	-1	p11.2	protein_coding
0.00326	0.161	198.08	128.19	1.55	218570_at	KBTBD4	ENSG00000123444	kelch repeat and BTB domain containing 4	chr11	47572197	47578976	-1	p11.2	protein_coding
0.0056841	0.165	104.01	63.61	1.64	218726_at	HJURP	ENSG00000123485	Holliday junction recognition protein	chr2	233833416	233854566	-1	q37.1	protein_coding
0.0040246	0.161	308.7	522.72	0.59	225827_at	2023-08-02	ENSG00000123908	argonaute RISC catalytic component 2	chr8	140520156	140635633	-1	q24.3	protein_coding
0.0092152	0.18	97.01	66.26	1.46	1553961_s_at	SNX21	ENSG00000124104	sorting nexin family member 21	chr20	45833799	45843276	1	q13.12	protein_coding
0.0035317	0.161	167.33	95.62	1.75	224925_at	PREX1	ENSG00000124126	phosphatidylinositol-3,4,5-trisphosphate dependent Rac exchange factor 1	chr20	48624252	48827999	-1	q13.13	protein_coding
0.0020287	0.161	264.28	108.26	2.44	224909_s_at	PREX1	ENSG00000124126	phosphatidylinositol-3,4,5-trisphosphate dependent Rac exchange factor 1	chr20	48624252	48827999	-1	q13.13	protein_coding
0.0038728	0.161	1623.84	135.56	11.98	208131_s_at	PTGIS	ENSG00000124212	prostaglandin I2 synthase	chr20	49503874	49568137	-1	q13.13	protein_coding
0.001501	0.161	251.86	791.76	0.32	222450_at	PMEPA1	ENSG00000124225	prostate transmembrane protein, androgen induced 1	chr20	57648392	57711536	-1	q13.31	protein_coding
0.0043221	0.161	683.93	2282.89	0.3	222449_at	PMEPA1	ENSG00000124225	prostate transmembrane protein, androgen induced 1	chr20	57648392	57711536	-1	q13.31	protein_coding
0.0009585	0.161	235	705.41	0.33	217875_s_at	PMEPA1	ENSG00000124225	prostate transmembrane protein, androgen induced 1	chr20	57648392	57711536	-1	q13.31	protein_coding
0.0099578	0.181	1014.07	676.67	1.5	202829_s_at	VAMP7	ENSG00000124333	vesicle associated membrane protein 7	chrX	155881345	155943769	1	q28	protein_coding
0.0033043	0.161	1398.21	639.64	2.19	218231_at	NAGK	ENSG00000124357	N-acetylglucosamine kinase	chr2	71064344	71079808	1	p13.3	protein_coding
0.0045861	0.161	209.82	683.2	0.31	204952_at	LYPD3	ENSG00000124466	LY6/PLAUR domain containing 3	chr19	43460787	43465608	-1	q13.31	protein_coding
0.0047227	0.161	91.93	21.95	4.19	203305_at	F13A1	ENSG00000124491	coagulation factor XIII A chain	chr6	6144084	6321013	-1	p25.1	protein_coding
0.0001611	0.12	614.46	55.21	11.13	219434_at	TREM1	ENSG00000124731	triggering receptor expressed on myeloid cells 1	chr6	41267926	41286682	-1	p21.1	protein_coding
0.0024127	0.161	233.44	386.74	0.6	224450_s_at	RIOK1	ENSG00000124784	RIO kinase 1	chr6	7389793	7418037	1	p24.3	protein_coding
0.0029361	0.161	692.93	1202.84	0.58	202097_at	NUP153	ENSG00000124789	nucleoporin 153	chr6	17615035	17706925	-1	p22.3	protein_coding
0.0029946	0.161	212.82	75.35	2.82	219256_s_at	SH3TC1	ENSG00000125089	SH3 domain and tetratricopeptide repeats 1	chr4	8182072	8241803	1	p16.1	protein_coding
0.0045412	0.161	21267.7	6600.92	3.22	204745_x_at	MT1G	ENSG00000125144	metallothionein 1G	chr16	56666730	56668065	-1	q13	protein_coding
0.0081224	0.177	31680.4	13024.2	2.43	212185_x_at	MT2A	ENSG00000125148	metallothionein 2A	chr16	56608584	56609497	1	q13	protein_coding
0.000461	0.14	113.73	36.98	3.08	212415_at	SEPTIN6	ENSG00000125354	septin 6	chrX	119615724	119693370	-1	q24	protein_coding
0.0084162	0.178	4388.87	1103.73	3.98	205067_at	IL1B	ENSG00000125538	interleukin 1 beta	chr2	112829751	112836816	-1	q14.1	protein_coding
0.003532	0.161	187.15	361.72	0.52	1554595_at	SYMPK	ENSG00000125755	symplekin	chr19	45815410	45863194	-1	q13.32	protein_coding
0.0028556	0.161	87.79	213.9	0.41	40284_at	FOXA2	ENSG00000125798	forkhead box A2	chr20	22580998	22585455	-1	p11.21	protein_coding
0.0010621	0.161	328.56	179.07	1.83	219706_at	AP5S1	ENSG00000125843	adaptor related protein complex 5 subunit sigma 1	chr20	3820524	3828838	1	p13	protein_coding
0.0024697	0.161	60.41	98.06	0.62	219463_at	LAMP5	ENSG00000125869	lysosomal associated membrane protein family member 5	chr20	9514358	9530524	1	p12.2	protein_coding
0.0064	0.169	68.83	108.54	0.63	232004_at	HNRNPR	ENSG00000125944	heterogeneous nuclear ribonucleoprotein R	chr1	23303771	23344336	-1	p36.12	protein_coding
0.0070635	0.171	546.6	358.23	1.53	78047_s_at	MMP24OS	ENSG00000126005	MMP24 opposite strand	chr20	35201745	35278131	-1	q11.22	protein_coding
0.0061738	0.169	488.31	278.85	1.75	225860_at	MMP24OS	ENSG00000126005	MMP24 opposite strand	chr20	35201745	35278131	-1	q11.22	protein_coding
0.0065887	0.169	61.98	112.12	0.55	228932_at	2023-08-03	ENSG00000126070	argonaute RISC catalytic component 3	chr1	35930718	36072500	1	p34.3	protein_coding
0.0052635	0.164	100.34	211.17	0.48	241091_at	2023-08-03	ENSG00000126070	argonaute RISC catalytic component 3	chr1	35930718	36072500	1	p34.3	protein_coding
0.0050562	0.162	722.54	489.99	1.47	212647_at	RRAS	ENSG00000126458	RAS related	chr19	49635292	49640143	-1	q13.33	protein_coding
0.0062735	0.169	170.99	62.83	2.72	203764_at	DLGAP5	ENSG00000126787	DLG associated protein 5	chr14	55148112	55191608	-1	q22.3	protein_coding
0.0025179	0.161	152.63	27.66	5.52	204774_at	EVI2A	ENSG00000126860	ecotropic viral integration site 2A	chr17	31316410	31321749	-1	q11.2	protein_coding
0.0084622	0.178	329.61	226.8	1.45	202927_at	PIN1	ENSG00000127445	peptidylprolyl cis/trans isomerase, NIMA-interacting 1	chr19	9835257	9849689	1	p13.2	protein_coding
0.0004672	0.14	122.11	19.02	6.42	207610_s_at	ADGRE2	ENSG00000127507	adhesion G protein-coupled receptor E2	chr19	14732392	14778560	-1	p13.12	protein_coding
0.0012024	0.161	172.76	320.51	0.54	39705_at	SIN3B	ENSG00000127511	SIN3 transcription regulator family member B	chr19	16829398	16880353	1	p13.11	protein_coding
0.0058124	0.165	176.12	296.1	0.59	209352_s_at	SIN3B	ENSG00000127511	SIN3 transcription regulator family member B	chr19	16829398	16880353	1	p13.11	protein_coding
0.002372	0.161	139.65	64.9	2.15	226646_at	KLF2	ENSG00000127528	Kruppel like factor 2	chr19	16324826	16328685	1	p13.11	protein_coding
0.0038711	0.161	162.55	36.06	4.51	227265_at	FGL2	ENSG00000127951	fibrinogen like 2	chr7	77193369	77199848	-1	q11.23	protein_coding
0.0062558	0.169	18.15	43.19	0.42	1556185_a_at	STEAP4	ENSG00000127954	STEAP4 metalloreductase	chr7	88270892	88306894	-1	q21.12	protein_coding
0.0009801	0.161	998.66	230.39	4.33	213603_s_at	RAC2	ENSG00000128340	Rac family small GTPase 2	chr22	37225270	37244448	-1	q13.1	protein_coding
0.0017702	0.161	108	42.1	2.57	207419_s_at	RAC2	ENSG00000128340	Rac family small GTPase 2	chr22	37225270	37244448	-1	q13.1	protein_coding
0.0072078	0.171	264.87	1370.13	0.19	205157_s_at	KRT17	ENSG00000128422	keratin 17	chr17	41619442	41624842	-1	q21.2	protein_coding
0.0090698	0.18	859.31	3539.43	0.24	212236_x_at	KRT17	ENSG00000128422	keratin 17	chr17	41619442	41624842	-1	q21.2	protein_coding
0.0014315	0.161	128.11	52.38	2.45	206298_at	ARHGAP22	ENSG00000128805	Rho GTPase activating protein 22	chr10	48446036	48656265	-1	q11.23	protein_coding
0.0063435	0.169	112.44	172.4	0.65	225817_at	CGNL1	ENSG00000128849	cingulin like 1	chr15	57375967	57550717	1	q21.3	protein_coding
0.001267	0.161	325.23	70.43	4.62	207016_s_at	ALDH1A2	ENSG00000128918	aldehyde dehydrogenase 1 family member A2	chr15	57953424	58497866	-1	q21.3	protein_coding
0.0068874	0.17	1654.02	991.24	1.67	221844_x_at	SPCS3	ENSG00000129128	signal peptidase complex subunit 3	chr4	176319966	176332245	1	q34.2	protein_coding
0.0068129	0.17	180.91	109.42	1.65	221591_s_at	PIMREG	ENSG00000129195	PICALM interacting mitotic regulator	chr17	6444441	6451469	1	p13.2	protein_coding
0.0087418	0.178	711.22	437.83	1.62	202623_at	EAPP	ENSG00000129518	E2F associated phosphoprotein	chr14	34515938	34539704	-1	q13.1	protein_coding
0.0095772	0.18	926.82	634.85	1.46	221449_s_at	ITFG1	ENSG00000129636	integrin alpha FG-GAP repeat containing 1	chr16	47154387	47464149	-1	q12.1	protein_coding
0.0045157	0.161	220.43	103.27	2.13	209539_at	ARHGEF6	ENSG00000129675	Rac/Cdc42 guanine nucleotide exchange factor 6	chrX	136665547	136780932	-1	q26.3	protein_coding
0.0093329	0.18	374.05	225.35	1.66	209517_s_at	ASH2L	ENSG00000129691	ASH2 like, histone lysine methyltransferase complex subunit	chr8	38105493	38144076	1	p11.23	protein_coding
0.0084756	0.178	71.03	31.32	2.27	228546_at	DPP6	ENSG00000130226	dipeptidyl peptidase like 6	chr7	153887097	154894285	1	q36.2	protein_coding
0.0092928	0.18	105.8	53.75	1.97	222644_s_at	COLGALT1	ENSG00000130309	collagen beta(1-O)galactosyltransferase 1	chr19	17555649	17583162	1	p13.11	protein_coding
0.0085518	0.178	151.65	60.48	2.51	203523_at	LSP1	ENSG00000130592	lymphocyte specific protein 1	chr11	1850904	1892267	1	p15.5	protein_coding
0.0070499	0.171	416.73	110.38	3.78	204220_at	GMFG	ENSG00000130755	glia maturation factor gamma	chr19	39328353	39342372	-1	q13.2	protein_coding
0.0016187	0.161	771.05	132.97	5.8	202974_at	MPP1	ENSG00000130830	membrane palmitoylated protein 1	chrX	154778684	154821007	-1	q28	protein_coding
0.0046813	0.161	48.58	11.83	4.11	210146_x_at	LILRB2	ENSG00000131042	leukocyte immunoglobulin like receptor B2	chr19	54273812	54281184	-1	q13.42	protein_coding
0.0020746	0.161	207.75	125.14	1.66	221521_s_at	GINS2	ENSG00000131153	GINS complex subunit 2	chr16	85676198	85690073	-1	q24.1	protein_coding
0.0075126	0.173	984.56	514.06	1.92	224608_s_at	VPS25	ENSG00000131475	vacuolar protein sorting 25 homolog	chr17	42773449	42779599	1	q21.2	protein_coding
0.0073826	0.172	14.94	34.54	0.43	218804_at	ANO1	ENSG00000131620	anoctamin 1	chr11	69985907	70189530	1	q13.3	protein_coding
0.0011605	0.161	141.31	257.68	0.55	210235_s_at	PPFIA1	ENSG00000131626	PTPRF interacting protein alpha 1	chr11	70270690	70385312	1	q13.3	protein_coding
0.0059936	0.167	43.37	93.39	0.46	219315_s_at	TMEM204	ENSG00000131634	transmembrane protein 204	chr16	1528688	1555580	1	p13.3	protein_coding
0.0064188	0.169	326.79	184.93	1.77	211612_s_at	IL13RA1	ENSG00000131724	interleukin 13 receptor subunit alpha 1	chrX	118727133	118794535	1	q24	protein_coding
0.0013859	0.161	202.8	348.47	0.58	228590_at	PTCD3	ENSG00000132300	pentatricopeptide repeat domain 3	chr2	86106223	86142157	1	p11.2	protein_coding
0.0006172	0.148	193.08	345.14	0.56	228512_at	PTCD3	ENSG00000132300	pentatricopeptide repeat domain 3	chr2	86106223	86142157	1	p11.2	protein_coding
0.0057929	0.165	186.32	36.42	5.12	206682_at	CLEC10A	ENSG00000132514	C-type lectin domain containing 10A	chr17	7074537	7080307	-1	p13.1	protein_coding
0.0069106	0.17	71.14	47.85	1.49	240846_at	PCBD2	ENSG00000132570	pterin-4 alpha-carbinolamine dehydratase 2	chr5	134905120	135007959	1	q31.1	protein_coding
0.0014612	0.161	742.92	1833.09	0.41	202220_at	KHDC4	ENSG00000132680	KH domain containing 4, pre-mRNA splicing factor	chr1	155913045	155934413	-1	q22	protein_coding
0.007656	0.175	399.01	241.38	1.65	203142_s_at	AP3B1	ENSG00000132842	adaptor related protein complex 3 subunit beta 1	chr5	78002326	78294698	-1	q14.1	protein_coding
0.0003506	0.133	759.43	122.41	6.2	204174_at	ALOX5AP	ENSG00000132965	arachidonate 5-lipoxygenase activating protein	chr13	30713478	30764426	1	q12.3	protein_coding
0.0042461	0.161	172	290.52	0.59	219188_s_at	MACROD1	ENSG00000133315	mono-ADP ribosylhydrolase 1	chr11	63998558	64166113	-1	q13.1	protein_coding
0.0027044	0.161	108.06	33.14	3.26	1559975_at	BTG1	ENSG00000133639	BTG anti-proliferation factor 1	chr12	92140278	92145846	-1	q21.33	protein_coding
0.0019929	0.161	316.64	182.48	1.74	214710_s_at	CCNB1	ENSG00000134057	cyclin B1	chr5	69167135	69178245	1	q13.2	protein_coding
0.0085396	0.178	39.08	17.84	2.19	206060_s_at	PTPN22	ENSG00000134242	protein tyrosine phosphatase non-receptor type 22	chr1	113813811	113871753	-1	p13.2	protein_coding
0.0035933	0.161	8762.54	14762.2	0.59	222982_x_at	SLC38A2	ENSG00000134294	solute carrier family 38 member 2	chr12	46358188	46372773	-1	q13.11	protein_coding
0.001656	0.161	5367.57	9784.56	0.55	218041_x_at	SLC38A2	ENSG00000134294	solute carrier family 38 member 2	chr12	46358188	46372773	-1	q13.11	protein_coding
0.0008112	0.161	5491.54	10668.4	0.51	220924_s_at	SLC38A2	ENSG00000134294	solute carrier family 38 member 2	chr12	46358188	46372773	-1	q13.11	protein_coding
0.0076708	0.175	899.06	541.41	1.66	225908_at	IAH1	ENSG00000134330	isoamyl acetate hydrolyzing esterase 1 (putative)	chr2	9473658	9496543	1	p25.1	protein_coding
0.0056124	0.165	88.11	169.65	0.52	229882_at	RPS15A	ENSG00000134419	ribosomal protein S15a	chr16	18781295	18790383	-1	p12.3	protein_coding
0.0003163	0.132	204.37	27.29	7.49	213160_at	DOCK2	ENSG00000134516	dedicator of cytokinesis 2	chr5	169637268	170083382	1	q35.1	protein_coding
0.0023179	0.161	159.36	460.49	0.35	229011_at	EMP1	ENSG00000134531	epithelial membrane protein 1	chr12	13196723	13219941	1	p13.1	protein_coding
0.0024531	0.161	255.08	557.27	0.46	1564796_at	EMP1	ENSG00000134531	epithelial membrane protein 1	chr12	13196723	13219941	1	p13.1	protein_coding
0.000805	0.161	125.14	304.07	0.41	213895_at	EMP1	ENSG00000134531	epithelial membrane protein 1	chr12	13196723	13219941	1	p13.1	protein_coding
0.0058828	0.166	227.74	142.91	1.59	203409_at	DDB2	ENSG00000134574	damage specific DNA binding protein 2	chr11	47214465	47239217	1	p11.2	protein_coding
0.0059009	0.166	194.55	429.61	0.45	238760_at	YARS1	ENSG00000134684	tyrosyl-tRNA synthetase 1	chr1	32775237	32817380	-1	p35.1	protein_coding
0.0021102	0.161	29.16	79.2	0.37	230657_at	TMEM165	ENSG00000134851	transmembrane protein 165	chr4	55395957	55453397	1	q12	protein_coding
0.0070903	0.171	613.44	1841.78	0.33	224833_at	ETS1	ENSG00000134954	ETS proto-oncogene 1, transcription factor	chr11	128458761	128587558	-1	q24.3	protein_coding
0.0090867	0.18	411.39	51.61	7.97	235458_at	HAVCR2	ENSG00000135077	hepatitis A virus cellular receptor 2	chr5	157085832	157142869	-1	q33.3	protein_coding
0.0041366	0.161	637.78	968.73	0.66	223982_s_at	PNPLA8	ENSG00000135241	patatin like phospholipase domain containing 8	chr7	108470417	108569666	-1	q31.1	protein_coding
0.0036605	0.161	852.71	1929.44	0.44	202719_s_at	TES	ENSG00000135269	testin LIM domain protein	chr7	116210506	116258783	1	q31.2	protein_coding
0.0099349	0.181	377.06	192.9	1.95	211675_s_at	MDFIC	ENSG00000135272	MyoD family inhibitor domain containing	chr7	114922094	115019917	1	q31.1	protein_coding
0.004646	0.161	249.1	841.59	0.3	232361_s_at	EHF	ENSG00000135373	ETS homologous factor	chr11	34621093	34663288	1	p13	protein_coding
0.0099102	0.181	58.44	112.49	0.52	205539_at	AVIL	ENSG00000135407	advillin	chr12	57797376	57818734	-1	q14.1	protein_coding
0.0047109	0.161	25.83	37.77	0.68	236291_at	RDH5	ENSG00000135437	retinol dehydrogenase 5	chr12	55720367	55724705	1	q13.2	protein_coding
0.0058384	0.165	212.63	130.16	1.63	1568596_a_at	TROAP	ENSG00000135451	trophinin associated protein	chr12	49323236	49331731	1	q13.12	protein_coding
0.0099933	0.181	98.24	40.82	2.41	231990_at	USP15	ENSG00000135655	ubiquitin specific peptidase 15	chr12	62260338	62417431	1	q14.1	protein_coding
0.0017948	0.161	289.6	165.86	1.75	212335_at	GNS	ENSG00000135677	glucosamine (N-acetyl)-6-sulfatase	chr12	64713445	64759431	-1	q14.3	protein_coding
0.0021407	0.161	1430.01	805.39	1.78	212334_at	GNS	ENSG00000135677	glucosamine (N-acetyl)-6-sulfatase	chr12	64713445	64759431	-1	q14.3	protein_coding
0.0018364	0.161	27.82	16.32	1.7	1554906_a_at	MPHOSPH6	ENSG00000135698	M-phase phosphoprotein 6	chr16	82147798	82170224	-1	q23.3	protein_coding
0.004635	0.161	259.23	567.97	0.46	204678_s_at	KCNK1	ENSG00000135750	potassium two pore domain channel subfamily K member 1	chr1	233614106	233672514	1	q42.2	protein_coding
0.0014754	0.161	181.96	292.95	0.62	213654_at	TAF5L	ENSG00000135801	TATA-box binding protein associated factor 5 like	chr1	229593121	229626047	-1	q42.13	protein_coding
0.0004811	0.141	429.18	60.31	7.12	223405_at	NPL	ENSG00000135838	N-acetylneuraminate pyruvate lyase	chr1	182789293	182830384	1	q25.3	protein_coding
0.0042544	0.161	216.69	24.18	8.96	221210_s_at	NPL	ENSG00000135838	N-acetylneuraminate pyruvate lyase	chr1	182789293	182830384	1	q25.3	protein_coding
0.0056968	0.165	48.62	28.18	1.73	215151_at	DOCK10	ENSG00000135905	dedicator of cytokinesis 10	chr2	224765090	225042468	-1	q36.2	protein_coding
0.0018185	0.161	33.07	12.28	2.69	219279_at	DOCK10	ENSG00000135905	dedicator of cytokinesis 10	chr2	224765090	225042468	-1	q36.2	protein_coding
0.0034278	0.161	40.83	74.87	0.55	213403_at	MFSD9	ENSG00000135953	major facilitator superfamily domain containing 9	chr2	102714630	102736888	-1	q12.1	protein_coding
0.0095758	0.18	112.95	73.09	1.55	229210_at	RNASEH2B	ENSG00000136104	ribonuclease H2 subunit B	chr13	50909747	51024120	1	q14.3	protein_coding
0.0036515	0.161	517.55	116.38	4.45	208885_at	LCP1	ENSG00000136167	lymphocyte cytosolic protein 1	chr13	46125920	46211871	-1	q14.13	protein_coding
0.0091595	0.18	84.45	24.64	3.43	1554018_at	GPNMB	ENSG00000136235	glycoprotein nmb	chr7	23235967	23275108	1	p15.3	protein_coding
0.0003371	0.132	5576.57	1035.35	5.39	201141_at	GPNMB	ENSG00000136235	glycoprotein nmb	chr7	23235967	23275108	1	p15.3	protein_coding
0.0006924	0.157	486.57	212	2.3	224674_at	TTYH3	ENSG00000136295	tweety family member 3	chr7	2631986	2664802	1	p22.3	protein_coding
0.0071761	0.171	272.71	501.22	0.54	201742_x_at	SRSF1	ENSG00000136450	serine and arginine rich splicing factor 1	chr17	58000919	58007346	-1	q22	protein_coding
0.0028961	0.161	126.35	72.32	1.75	211902_x_at	YME1L1	ENSG00000136758	YME1 like 1 ATPase	chr10	27110111	27155266	-1	p12.1	protein_coding
0.0089009	0.18	123.8	202.22	0.61	233487_s_at	LRRC8A	ENSG00000136802	leucine rich repeat containing 8 VRAC subunit A	chr9	128882133	128918039	1	q34.11	protein_coding
0.0088117	0.179	26.43	15.08	1.75	207068_at	ZFP37	ENSG00000136866	ZFP37 zinc finger protein	chr9	113038377	113056759	-1	q32	protein_coding
0.0067876	0.17	316.88	105.22	3.01	204204_at	SLC31A2	ENSG00000136867	solute carrier family 31 member 2	chr9	113150976	113164140	1	q32	protein_coding
0.0076662	0.175	158.47	230.88	0.69	218172_s_at	DERL1	ENSG00000136986	derlin 1	chr8	123013170	123042302	-1	q24.13	protein_coding
0.0086097	0.178	65.73	100.94	0.65	222660_s_at	RNF38	ENSG00000137075	ring finger protein 38	chr9	36336396	36487548	-1	p13.2	protein_coding
0.0082604	0.178	65.74	114.06	0.58	232763_at	TLN1	ENSG00000137076	talin 1	chr9	35696948	35732195	-1	p13.3	protein_coding
0.0075215	0.173	187.71	276.43	0.68	227120_at	FOXP4	ENSG00000137166	forkhead box P4	chr6	41546381	41602384	1	p21.1	protein_coding
0.0048711	0.161	52.4	87.1	0.6	228510_at	ATAT1	ENSG00000137343	alpha tubulin acetyltransferase 1	chr6	30626842	30646823	1	p21.33	protein_coding
0.000307	0.132	343.22	959.58	0.36	226939_at	CPEB2	ENSG00000137449	cytoplasmic polyadenylation element binding protein 2	chr4	15002481	15070153	1	p15.32	protein_coding
0.0027913	0.161	193.04	298.35	0.65	235479_at	CPEB2	ENSG00000137449	cytoplasmic polyadenylation element binding protein 2	chr4	15002481	15070153	1	p15.32	protein_coding
0.0077514	0.175	715.28	199.98	3.58	204924_at	TLR2	ENSG00000137462	toll like receptor 2	chr4	153684070	153706260	1	q31.3	protein_coding
0.0079128	0.176	427.8	109.54	3.91	203473_at	SLCO2B1	ENSG00000137491	solute carrier organic anion transporter family member 2B1	chr11	75100563	75206549	1	q13.4	protein_coding
0.0023886	0.161	191.22	349.85	0.55	225594_at	CREBZF	ENSG00000137504	CREB/ATF bZIP transcription factor	chr11	85657742	85682908	-1	q14.1	protein_coding
0.0019334	0.161	185.5	373.25	0.5	212560_at	SORL1	ENSG00000137642	sortilin related receptor 1	chr11	121452314	121633763	1	q24.1	protein_coding
0.000274	0.132	535.8	1083	0.49	203509_at	SORL1	ENSG00000137642	sortilin related receptor 1	chr11	121452314	121633763	1	q24.1	protein_coding
0.0089653	0.18	338.87	536.48	0.63	213342_at	YAP1	ENSG00000137693	Yes1 associated transcriptional regulator	chr11	102110447	102233424	1	q22.1	protein_coding
0.006242	0.169	650.97	328.44	1.98	209970_x_at	CASP1	ENSG00000137752	caspase 1	chr11	105025443	105035250	-1	q22.3	protein_coding
0.0056765	0.165	652.38	337.87	1.93	211366_x_at	CASP1	ENSG00000137752	caspase 1	chr11	105025443	105035250	-1	q22.3	protein_coding
0.0041829	0.161	328.47	167.93	1.96	211368_s_at	CASP1	ENSG00000137752	caspase 1	chr11	105025443	105035250	-1	q22.3	protein_coding
0.0031956	0.161	206	312.46	0.66	213394_at	MAPKBP1	ENSG00000137802	mitogen-activated protein kinase binding protein 1	chr15	41774434	41827855	1	q15.1	protein_coding
0.007174	0.171	51.31	179.09	0.29	1560318_at	ARHGAP29	ENSG00000137962	Rho GTPase activating protein 29	chr1	94148988	94275068	-1	p22.1	protein_coding
0.0032925	0.161	18.17	37.63	0.48	1554736_at	ARHGAP29	ENSG00000137962	Rho GTPase activating protein 29	chr1	94148988	94275068	-1	p22.1	protein_coding
0.0045272	0.161	59.74	22.46	2.66	204444_at	KIF11	ENSG00000138160	kinesin family member 11	chr10	92574105	92655395	1	q23.33	protein_coding
0.0053822	0.164	148.29	84.12	1.76	57715_at	CALHM2	ENSG00000138172	calcium homeostasis modulator family member 2	chr10	103446786	103452402	-1	q24.33	protein_coding
0.0049048	0.161	251.18	129.72	1.94	218542_at	CEP55	ENSG00000138180	centrosomal protein 55	chr10	93496612	93529092	1	q23.33	protein_coding
0.002256	0.161	44.08	26.78	1.65	207691_x_at	ENTPD1	ENSG00000138185	ectonucleoside triphosphate diphosphohydrolase 1	chr10	95711779	95877266	1	q24.1	protein_coding
0.0038445	0.161	65.23	301.33	0.22	1555878_at	RPS24	ENSG00000138326	ribosomal protein S24	chr10	78033760	78056813	1	q22.3	protein_coding
0.0043778	0.161	1278.15	712.4	1.79	1555037_a_at	IDH1	ENSG00000138413	isocitrate dehydrogenase (NADP(+)) 1	chr2	208236229	208266074	-1	q34	protein_coding
0.0081225	0.177	36.56	62.6	0.58	236207_at	ITPRID2	ENSG00000138434	ITPR interacting domain containing 2	chr2	181891730	181930738	1	q31.3	protein_coding
0.0065487	0.169	721.33	1233.94	0.58	202506_at	ITPRID2	ENSG00000138434	ITPR interacting domain containing 2	chr2	181891730	181930738	1	q31.3	protein_coding
0.0066795	0.17	130.44	92.84	1.4	218519_at	SLC35A5	ENSG00000138459	solute carrier family 35 member A5	chr3	112561709	112585579	1	q13.2	protein_coding
0.008415	0.178	258.55	132.63	1.95	221036_s_at	APH1B	ENSG00000138613	aph-1 homolog B, gamma-secretase subunit	chr15	63276018	63309126	1	q22.2	protein_coding
0.0090864	0.18	301.89	206.1	1.46	225063_at	UBL7	ENSG00000138629	ubiquitin like 7	chr15	74445977	74461182	-1	q24.1	protein_coding
0.0035508	0.161	433.51	723.06	0.6	213359_at	HNRNPD	ENSG00000138668	heterogeneous nuclear ribonucleoprotein D	chr4	82352498	82374503	-1	q21.22	protein_coding
0.0006448	0.153	174.18	69.02	2.52	1554999_at	RASGEF1B	ENSG00000138670	RasGEF domain family member 1B	chr4	81426393	82044244	-1	q21.22	protein_coding
0.0067267	0.17	181.11	85.45	2.12	227135_at	NAAA	ENSG00000138744	N-acylethanolamine acid amidase	chr4	75913660	75941013	-1	q21.1	protein_coding
0.00684	0.17	117.9	65.02	1.81	214765_s_at	NAAA	ENSG00000138744	N-acylethanolamine acid amidase	chr4	75913660	75941013	-1	q21.1	protein_coding
0.0036619	0.161	137.77	56.64	2.43	205046_at	CENPE	ENSG00000138778	centromere protein E	chr4	103105349	103198445	-1	q24	protein_coding
0.0005103	0.142	9.15	35.01	0.26	204844_at	ENPEP	ENSG00000138792	glutamyl aminopeptidase	chr4	110365733	110565285	1	q25	protein_coding
0.0066133	0.169	196.81	120.77	1.63	219869_s_at	SLC39A8	ENSG00000138821	solute carrier family 39 member 8	chr4	102251080	102431258	-1	q24	protein_coding
0.0022991	0.161	260.94	79.53	3.28	223562_at	PARVG	ENSG00000138964	parvin gamma	chr22	44172956	44219533	1	q13.31	protein_coding
0.0094156	0.18	766.64	1182.84	0.65	223038_s_at	SINHCAF	ENSG00000139146	SIN3-HDAC complex associated factor	chr12	31280584	31327058	-1	p11.21	protein_coding
0.0095763	0.18	69.69	31.17	2.24	235709_at	GAS2L3	ENSG00000139354	growth arrest specific 2 like 3	chr12	100573683	100628288	1	q23.1	protein_coding
0.0015055	0.161	189.82	54.65	3.47	223767_at	GPR84	ENSG00000139572	G protein-coupled receptor 84	chr12	54362445	54364487	-1	q13.13	protein_coding
0.005277	0.164	49.88	30.63	1.63	234993_at	ABHD13	ENSG00000139826	abhydrolase domain containing 13	chr13	108218392	108234243	1	q33.3	protein_coding
0.0004722	0.14	81.5	28.38	2.87	203485_at	RTN1	ENSG00000139970	reticulon 1	chr14	59595976	59870776	-1	q23.1	protein_coding
0.0073358	0.172	53.84	26.97	2	1552543_a_at	STON2	ENSG00000140022	stonin 2	chr14	81260652	81436465	-1	q31.1	protein_coding
0.0031148	0.161	89.24	25.68	3.47	214467_at	GPR65	ENSG00000140030	G protein-coupled receptor 65	chr14	88005135	88014811	1	q31.3	protein_coding
0.0036467	0.161	59.34	40.19	1.48	238041_at	TCF12	ENSG00000140262	transcription factor 12	chr15	56918623	57299281	1	q21.3	protein_coding
0.008572	0.178	377.59	253.05	1.49	209132_s_at	COMMD4	ENSG00000140365	COMM domain containing 4	chr15	75336020	75343224	1	q24.2	protein_coding
0.0053767	0.164	69.39	44.71	1.55	228252_at	PIF1	ENSG00000140451	PIF1 5'-to-3' DNA helicase	chr15	64815632	64825668	-1	q22.31	protein_coding
0.0049209	0.161	46.25	103.21	0.45	205749_at	CYP1A1	ENSG00000140465	cytochrome P450 family 1 subfamily A member 1	chr15	74719542	74725536	-1	q24.1	protein_coding
0.0054462	0.165	282.54	141.14	2	210184_at	ITGAX	ENSG00000140678	integrin subunit alpha X	chr16	31355134	31382999	1	p11.2	protein_coding
0.0049909	0.162	202.69	33.82	5.99	206420_at	IGSF6	ENSG00000140749	immunoglobulin superfamily member 6	chr16	21639550	21652608	-1	p12.2	protein_coding
0.0035325	0.161	331.99	149.72	2.22	218676_s_at	PCTP	ENSG00000141179	phosphatidylcholine transfer protein	chr17	55751051	55842830	1	q22	protein_coding
0.0017486	0.161	403.27	910.99	0.44	235020_at	TAF4B	ENSG00000141384	TATA-box binding protein associated factor 4b	chr18	26226445	26391685	1	q11.2	protein_coding
0.0018817	0.161	897.68	362.35	2.48	202856_s_at	SLC16A3	ENSG00000141526	solute carrier family 16 member 3	chr17	82217934	82261129	1	q25.3	protein_coding
0.009482	0.18	247.94	447.45	0.55	226224_at	FOXK2	ENSG00000141568	forkhead box K2	chr17	82519713	82644662	1	q25.3	protein_coding
0.00574	0.165	27.49	16.39	1.68	238846_at	TNFRSF11A	ENSG00000141655	TNF receptor superfamily member 11a	chr18	62325287	62391288	1	q21.33	protein_coding
0.0097465	0.181	164.45	69.03	2.38	206219_s_at	VAV1	ENSG00000141968	vav guanine nucleotide exchange factor 1	chr19	6772708	6857366	1	p13.3	protein_coding
0.0057091	0.165	1181.89	221.95	5.33	203729_at	EMP3	ENSG00000142227	epithelial membrane protein 3	chr19	48321509	48330553	1	q13.33	protein_coding
0.0047057	0.161	383.35	69.21	5.54	213733_at	MYO1F	ENSG00000142347	myosin IF	chr19	8520778	8577577	-1	p13.2	protein_coding
0.0026658	0.161	45.09	21.93	2.06	219525_at	SLC47A1	ENSG00000142494	solute carrier family 47 member 1	chr17	19495385	19579034	1	p11.2	protein_coding
0.0002071	0.12	287.16	62.77	4.57	204430_s_at	SLC2A5	ENSG00000142583	solute carrier family 2 member 5	chr1	9035106	9088478	-1	p36.23	protein_coding
0.0005127	0.142	961.63	2227.27	0.43	203499_at	EPHA2	ENSG00000142627	EPH receptor A2	chr1	16124337	16156069	-1	p36.13	protein_coding
0.0042451	0.161	487.79	163.97	2.97	202741_at	PRKACB	ENSG00000142875	protein kinase cAMP-activated catalytic subunit beta	chr1	84078062	84238498	1	p31.1	protein_coding
0.0078243	0.175	400.16	50.65	7.9	228532_at	C1orf162	ENSG00000143110	chromosome 1 open reading frame 162	chr1	111473792	111478512	1	p13.2	protein_coding
0.0044526	0.161	1018.05	141.57	7.19	203416_at	CD53	ENSG00000143119	CD53 molecule	chr1	110871188	110899922	1	p13.3	protein_coding
0.0051867	0.163	2216.95	1118.54	1.98	201200_at	CREG1	ENSG00000143162	cellular repressor of E1A stimulated genes 1	chr1	167529117	167553805	-1	q24.2	protein_coding
0.0032142	0.161	122.51	38	3.22	206366_x_at	XCL1	ENSG00000143184	X-C motif chemokine ligand 1	chr1	168576605	168582069	1	q24.2	protein_coding
0.0030335	0.161	425.85	100.31	4.25	203561_at	FCGR2A	ENSG00000143226	Fc fragment of IgG receptor IIa	chr1	161505430	161524013	1	q23.3	protein_coding
0.0040448	0.161	87.83	400.02	0.22	209071_s_at	RGS5	ENSG00000143248	regulator of G protein signaling 5	chr1	163111121	163321791	-1	q23.3	protein_coding
0.0062952	0.169	26.27	91.08	0.29	1555725_a_at	RGS5	ENSG00000143248	regulator of G protein signaling 5	chr1	163111121	163321791	-1	q23.3	protein_coding
0.0041458	0.161	26.3	163.98	0.16	218353_at	RGS5	ENSG00000143248	regulator of G protein signaling 5	chr1	163111121	163321791	-1	q23.3	protein_coding
0.0060474	0.167	164.25	74.01	2.22	226851_at	LYPLAL1	ENSG00000143353	lysophospholipase like 1	chr1	219173869	219212865	1	q41	protein_coding
0.0089239	0.18	42.1	66.65	0.63	211205_x_at	PIP5K1A	ENSG00000143398	phosphatidylinositol-4-phosphate 5-kinase type 1 alpha	chr1	151197949	151249536	1	q21.3	protein_coding
0.0017687	0.161	555	881.95	0.63	212153_at	POGZ	ENSG00000143442	pogo transposable element derived with ZNF domain	chr1	151402724	151459494	-1	q21.3	protein_coding
0.0074411	0.173	117.89	178.38	0.66	215281_x_at	POGZ	ENSG00000143442	pogo transposable element derived with ZNF domain	chr1	151402724	151459494	-1	q21.3	protein_coding
0.0045021	0.161	38.95	71.88	0.54	212921_at	SMYD2	ENSG00000143499	SET and MYND domain containing 2	chr1	214281102	214337131	1	q32.3	protein_coding
0.0028096	0.161	115.36	216.56	0.53	223822_at	SUSD4	ENSG00000143502	sushi domain containing 4	chr1	223220819	223364233	-1	q41	protein_coding
0.0016046	0.161	831.63	2157.66	0.39	203120_at	TP53BP2	ENSG00000143514	tumor protein p53 binding protein 2	chr1	223779893	223845954	-1	q41	protein_coding
0.001644	0.161	101.21	226.59	0.45	238076_at	GATAD2B	ENSG00000143614	GATA zinc finger domain containing 2B	chr1	153789030	153923360	-1	q21.3	protein_coding
0.0039265	0.161	284.15	478.7	0.59	202271_at	FBXO28	ENSG00000143756	F-box protein 28	chr1	224114111	224162047	1	q42.11	protein_coding
0.004037	0.161	24.61	58.7	0.42	1569111_at	SOX13	ENSG00000143842	SRY-box transcription factor 13	chr1	204073115	204127743	1	q32.1	protein_coding
0.0050009	0.162	60.14	29.51	2.04	204852_s_at	PTPN7	ENSG00000143851	protein tyrosine phosphatase non-receptor type 7	chr1	202147013	202161588	-1	q32.1	protein_coding
0.0004565	0.14	284.12	143.41	1.98	235256_s_at	GALM	ENSG00000143891	galactose mutarotase	chr2	38666081	38741237	1	p22.1	protein_coding
0.0074238	0.173	72.07	105.37	0.68	237560_at	MRPS5	ENSG00000144029	mitochondrial ribosomal protein S5	chr2	95085369	95149434	-1	q11.1	protein_coding
0.0085149	0.178	135.14	220.19	0.61	236706_at	LYG1	ENSG00000144214	lysozyme g1	chr2	99284238	99304742	-1	q11.2	protein_coding
0.0005209	0.142	28.56	68.43	0.42	214874_at	PKP4	ENSG00000144283	plakophilin 4	chr2	158456952	158682879	1	q24.1	protein_coding
0.0072247	0.171	181.36	119.48	1.52	225718_at	LNPK	ENSG00000144320	lunapark, ER junction formation factor	chr2	175923882	176002839	-1	q31.1	protein_coding
0.0039383	0.161	47.03	77.36	0.61	231252_at	KANSL1L	ENSG00000144445	KAT8 regulatory NSL complex subunit 1 like	chr2	210021421	210171409	-1	q34	protein_coding
0.0028273	0.161	35.2	59.51	0.59	242539_at	DIS3L2	ENSG00000144535	DIS3 like 3'-5' exoribonuclease 2	chr2	231961245	232344350	1	q37.1	protein_coding
0.0093428	0.18	225.07	127.7	1.76	222129_at	RETREG2	ENSG00000144567	reticulophagy regulator family member 2	chr2	219176225	219185475	1	q35	protein_coding
0.0073247	0.172	535.46	791.79	0.68	201567_s_at	GOLGA4	ENSG00000144674	golgin A4	chr3	37243191	37366879	1	p22.2	protein_coding
0.0024231	0.161	189.67	350.65	0.54	204294_at	AMT	ENSG00000145020	aminomethyltransferase	chr3	49416778	49422685	-1	p21.31	protein_coding
0.0048228	0.161	119.77	175.04	0.68	226477_at	DCAF1	ENSG00000145041	DDB1 and CUL4 associated factor 1	chr3	51395867	51500015	-1	p21.2	protein_coding
0.0031638	0.161	430.22	778.46	0.55	226481_at	DCAF1	ENSG00000145041	DDB1 and CUL4 associated factor 1	chr3	51395867	51500015	-1	p21.2	protein_coding
0.0040209	0.161	306.3	170.39	1.8	226689_at	CISD2	ENSG00000145354	CDGSH iron sulfur domain 2	chr4	102868974	102892807	1	q24	protein_coding
0.0022798	0.161	77.21	35.12	2.2	203418_at	CCNA2	ENSG00000145386	cyclin A2	chr4	121816444	121823883	-1	q27	protein_coding
0.0085708	0.178	18.93	94.19	0.2	223122_s_at	SFRP2	ENSG00000145423	secreted frizzled related protein 2	chr4	153780591	153789083	-1	q31.3	protein_coding
0.00935	0.18	26.06	67.12	0.39	223121_s_at	SFRP2	ENSG00000145423	secreted frizzled related protein 2	chr4	153780591	153789083	-1	q31.3	protein_coding
0.0020036	0.161	110.6	34.4	3.21	205488_at	GZMA	ENSG00000145649	granzyme A	chr5	55102646	55110252	1	q11.2	protein_coding
0.0056802	0.165	101.24	62	1.63	219467_at	GIN1	ENSG00000145723	gypsy retrotransposon integrase 1	chr5	103086000	103120138	-1	q21.1	protein_coding
0.0038189	0.161	56.93	96.86	0.59	224227_s_at	BDP1	ENSG00000145734	B double prime 1, subunit of RNA polymerase III transcription initiation factor IIIB	chr5	71455651	71567820	1	q13.2	protein_coding
0.0036362	0.161	122.55	65.36	1.88	243423_at	TNIP1	ENSG00000145901	TNFAIP3 interacting protein 1	chr5	151029945	151093577	-1	q33.1	protein_coding
0.0088865	0.18	2299.86	1463.79	1.57	209329_x_at	HIGD2A	ENSG00000146066	HIG1 hypoxia inducible domain family member 2A	chr5	176388751	176389761	1	q35.2	protein_coding
0.0043341	0.161	41.54	21.21	1.96	244407_at	CYP39A1	ENSG00000146233	cytochrome P450 family 39 subfamily A member 1	chr6	46549580	46652830	-1	p12.3	protein_coding
0.0085316	0.178	75.46	29.85	2.53	225166_at	ARHGAP18	ENSG00000146376	Rho GTPase activating protein 18	chr6	129576132	129710177	-1	q22.33	protein_coding
0.0011958	0.161	483.79	163.08	2.97	225173_at	ARHGAP18	ENSG00000146376	Rho GTPase activating protein 18	chr6	129576132	129710177	-1	q22.33	protein_coding
0.0004026	0.139	271.95	100.44	2.71	225171_at	ARHGAP18	ENSG00000146376	Rho GTPase activating protein 18	chr6	129576132	129710177	-1	q22.33	protein_coding
0.0019376	0.161	36.65	92.49	0.4	227866_at	TIAM2	ENSG00000146426	TIAM Rac1 associated GEF 2	chr6	154832697	155257723	1	q25.2	protein_coding
0.0018817	0.161	20.56	42.18	0.49	241482_at	EPHA1	ENSG00000146904	EPH receptor A1	chr7	143390289	143408856	-1	q35	protein_coding
0.0015383	0.161	141.24	278.23	0.51	229220_x_at	NOM1	ENSG00000146909	nucleolar protein with MIF4G domain 1	chr7	156949712	156973176	1	q36.3	protein_coding
0.006471	0.169	199.88	135.11	1.48	223909_s_at	HDAC8	ENSG00000147099	histone deacetylase 8	chrX	72329516	72573101	-1	q13.1	protein_coding
0.0098696	0.181	1310.67	2354.49	0.56	209240_at	OGT	ENSG00000147162	O-linked N-acetylglucosamine (GlcNAc) transferase	chrX	71533104	71575892	1	q13.1	protein_coding
0.0099098	0.181	53.28	153.97	0.35	238825_at	GCNA	ENSG00000147174	germ cell nuclear acidic peptidase	chrX	71578437	71613583	1	q13.1	protein_coding
0.0001587	0.12	377.02	54.81	6.88	226875_at	DOCK11	ENSG00000147251	dedicator of cytokinesis 11	chrX	118495815	118686163	1	q24	protein_coding
0.003236	0.161	59.14	18.66	3.17	238356_at	DOCK11	ENSG00000147251	dedicator of cytokinesis 11	chrX	118495815	118686163	1	q24	protein_coding
0.0058395	0.165	11.47	17.22	0.67	239006_at	SLC26A7	ENSG00000147606	solute carrier family 26 member 7	chr8	91209494	91398155	1	q21.3	protein_coding
0.0037958	0.161	133.65	221.71	0.6	227876_at	ARHGAP39	ENSG00000147799	Rho GTPase activating protein 39	chr8	144529179	144685846	-1	q24.3	protein_coding
0.0098999	0.181	223.54	900.24	0.25	236313_at	CDKN2B	ENSG00000147883	cyclin dependent kinase inhibitor 2B	chr9	22002903	22009305	-1	p21.3	protein_coding
0.0031242	0.161	154.86	286.97	0.54	230332_at	ZCCHC7	ENSG00000147905	zinc finger CCHC-type containing 7	chr9	37120574	37358149	1	p13.2	protein_coding
0.0017006	0.161	213.1	61.56	3.46	231780_at	GBGT1	ENSG00000148288	globoside alpha-1,3-N-acetylgalactosaminyltransferase 1 (FORS blood group)	chr9	133152948	133163933	-1	q34.2	protein_coding
0.0037301	0.161	9.99	25.85	0.39	208054_at	HERC4	ENSG00000148634	HECT and RLD domain containing E3 ubiquitin protein ligase 4	chr10	67921899	68075301	-1	q21.3	protein_coding
0.0021514	0.161	119.08	52.13	2.28	212023_s_at	MKI67	ENSG00000148773	marker of proliferation Ki-67	chr10	128096659	128126423	-1	q26.2	protein_coding
0.0099428	0.181	3877.4	1541.09	2.52	201470_at	GSTO1	ENSG00000148834	glutathione S-transferase omega 1	chr10	104235356	104267459	1	q25.1	protein_coding
0.0086107	0.178	2561.02	906.44	2.83	1557915_s_at	GSTO1	ENSG00000148834	glutathione S-transferase omega 1	chr10	104235356	104267459	1	q25.1	protein_coding
0.009694	0.181	69.4	144.97	0.48	210053_at	TAF5	ENSG00000148835	TATA-box binding protein associated factor 5	chr10	103367966	103389065	1	q24.33	protein_coding
0.0045206	0.161	139.56	70.81	1.97	230100_x_at	PAK1	ENSG00000149269	p21 (RAC1) activated kinase 1	chr11	77322017	77474635	-1	q14.1	protein_coding
0.0042364	0.161	2490.15	1442.82	1.73	223009_at	LAMTOR1	ENSG00000149357	late endosomal/lysosomal adaptor, MAPK and MTOR activator 1	chr11	72085895	72103297	-1	q13.4	protein_coding
0.0004626	0.14	537.37	51.85	10.36	216950_s_at	FCGR1A	ENSG00000150337	Fc fragment of IgG receptor Ia	chr1	149782671	149791675	1	q21.2	protein_coding
0.0017686	0.161	329.26	102.53	3.21	211732_x_at	HNMT	ENSG00000150540	histamine N-methyltransferase	chr2	137964020	138016364	1	q22.1	protein_coding
0.0043846	0.161	576.34	194.64	2.96	204112_s_at	HNMT	ENSG00000150540	histamine N-methyltransferase	chr2	137964020	138016364	1	q22.1	protein_coding
0.0051172	0.162	13.31	8.15	1.63	1557166_at	PDCD4	ENSG00000150593	programmed cell death 4	chr10	110871795	110900006	1	q25.2	protein_coding
0.0023619	0.161	76.46	134.82	0.57	220316_at	NPAS3	ENSG00000151322	neuronal PAS domain protein 3	chr14	32934396	33820863	1	q13.1	protein_coding
0.0048175	0.161	447.76	288.12	1.55	226155_at	FHIP2A	ENSG00000151553	FHF complex subunit HOOK interacting protein 2A	chr10	114821744	114899832	1	q25.3	protein_coding
0.007759	0.175	102.72	171.55	0.6	219178_at	QTRT2	ENSG00000151576	queuine tRNA-ribosyltransferase accessory subunit 2	chr3	114005833	114088422	1	q13.31	protein_coding
0.0020438	0.161	40.86	22.17	1.84	229305_at	CENPU	ENSG00000151725	centromere protein U	chr4	184694085	184734130	-1	q35.1	protein_coding
0.0007979	0.161	357.7	154.82	2.31	218883_s_at	CENPU	ENSG00000151725	centromere protein U	chr4	184694085	184734130	-1	q35.1	protein_coding
0.0091192	0.18	611.35	166.96	3.66	207275_s_at	ACSL1	ENSG00000151726	acyl-CoA synthetase long chain family member 1	chr4	184755595	184826818	-1	q35.1	protein_coding
0.0014039	0.161	475.59	131.38	3.62	201963_at	ACSL1	ENSG00000151726	acyl-CoA synthetase long chain family member 1	chr4	184755595	184826818	-1	q35.1	protein_coding
0.0064127	0.169	190.55	315.38	0.6	234491_s_at	SAV1	ENSG00000151748	salvador family WW domain containing protein 1	chr14	50632058	50668306	-1	q22.1	protein_coding
0.0071399	0.171	139.4	56.66	2.46	232098_at	DST	ENSG00000151914	dystonin	chr6	56457987	56954830	-1	p12.1	protein_coding
0.0032395	0.161	71.98	108	0.67	232031_s_at	EPG5	ENSG00000152223	ectopic P-granules autophagy protein 5 homolog	chr18	45847609	45967329	-1	q21.1	protein_coding
0.0093486	0.18	101.28	233.86	0.43	1554608_at	TGOLN2	ENSG00000152291	trans-golgi network protein 2	chr2	85318027	85328251	-1	p11.2	protein_coding
3.28e-05	0.12	42.06	605.52	0.069	200795_at	SPARCL1	ENSG00000152583	SPARC like 1	chr4	87473335	87531061	-1	q22.1	protein_coding
0.0037249	0.161	1219.14	788.33	1.55	218384_at	CARHSP1	ENSG00000153048	calcium regulated heat stable protein 1	chr16	8852942	8869012	-1	p13.2	protein_coding
0.0009935	0.161	728.42	177.13	4.11	210757_x_at	DAB2	ENSG00000153071	DAB adaptor protein 2	chr5	39371675	39462300	-1	p13.1	protein_coding
0.0074353	0.173	577.13	140.48	4.11	201279_s_at	DAB2	ENSG00000153071	DAB adaptor protein 2	chr5	39371675	39462300	-1	p13.1	protein_coding
0.0008389	0.161	523.27	134.57	3.89	201278_at	DAB2	ENSG00000153071	DAB adaptor protein 2	chr5	39371675	39462300	-1	p13.1	protein_coding
0.0028252	0.161	362.45	94.17	3.85	201280_s_at	DAB2	ENSG00000153071	DAB adaptor protein 2	chr5	39371675	39462300	-1	p13.1	protein_coding
0.0050992	0.162	81.24	162.93	0.5	229456_s_at	DDAH1	ENSG00000153904	dimethylarginine dimethylaminohydrolase 1	chr1	85318481	85578363	-1	p22.3	protein_coding
0.0047605	0.161	63.86	126.47	0.5	238694_at	DGKE	ENSG00000153933	diacylglycerol kinase epsilon	chr17	56834107	56869567	1	q22	protein_coding
0.0007447	0.161	125.77	39.34	3.2	211828_s_at	TNIK	ENSG00000154310	TRAF2 and NCK interacting kinase	chr3	171058414	171460408	-1	q26.31	protein_coding
0.00466	0.161	147.66	55.12	2.68	216044_x_at	DIPK1A	ENSG00000154511	divergent protein kinase domain 1A	chr1	92832737	92961522	-1	p22.1	protein_coding
0.0037419	0.161	214.64	82.23	2.61	213689_x_at	DIPK1A	ENSG00000154511	divergent protein kinase domain 1A	chr1	92832737	92961522	-1	p22.1	protein_coding
0.0044205	0.161	321.03	48.74	6.59	206584_at	LY96	ENSG00000154589	lymphocyte antigen 96	chr8	73991392	74029079	1	q21.11	protein_coding
0.0005967	0.147	423.63	251.56	1.68	235407_at	RABGEF1	ENSG00000154710	RAB guanine nucleotide exchange factor 1	chr7	66682164	66811464	1	q11.21	protein_coding
0.0011935	0.161	143.32	73.59	1.95	213309_at	PLCL2	ENSG00000154822	phospholipase C like 2	chr3	16802651	17090604	1	p24.3	protein_coding
0.0014713	0.161	276	64.48	4.28	1555638_a_at	SAMSN1	ENSG00000155307	SAM domain, SH3 domain and nuclear localization signals 1	chr21	14485228	14658821	-1	q11.2	protein_coding
0.0077805	0.175	384.99	68.9	5.59	220330_s_at	SAMSN1	ENSG00000155307	SAM domain, SH3 domain and nuclear localization signals 1	chr21	14485228	14658821	-1	q11.2	protein_coding
0.0013897	0.161	977.63	156.4	6.25	204588_s_at	SLC7A7	ENSG00000155465	solute carrier family 7 member 7	chr14	22773222	22829820	-1	q11.2	protein_coding
0.0091909	0.18	242.23	154.37	1.57	228578_at	RBM45	ENSG00000155636	RNA binding motif protein 45	chr2	178112424	178139011	1	q31.2	protein_coding
0.0001741	0.12	1073.05	49.72	21.58	204787_at	VSIG4	ENSG00000155659	V-set and immunoglobulin domain containing 4	chrX	66021738	66040125	-1	q12	protein_coding
0.0093683	0.18	87.93	144.31	0.61	1554178_a_at	HYCC2	ENSG00000155744	family with sequence similarity 126 member B	chr2	200973718	201071671	-1	q33.1	protein_coding
0.0007506	0.161	162.55	348.44	0.47	206636_at	RASA2	ENSG00000155903	RAS p21 protein activator 2	chr3	141487027	141615344	1	q23	protein_coding
0.0024727	0.161	606.65	1412.54	0.43	230669_at	RASA2	ENSG00000155903	RAS p21 protein activator 2	chr3	141487027	141615344	1	q23	protein_coding
0.0026844	0.161	494.06	100.26	4.93	203761_at	SLA	ENSG00000155926	Src like adaptor	chr8	133036728	133102912	-1	q24.22	protein_coding
0.006472	0.169	567.24	113.59	4.99	203760_s_at	SLA	ENSG00000155926	Src like adaptor	chr8	133036728	133102912	-1	q24.22	protein_coding
0.0050791	0.162	234.12	145.09	1.61	225228_at	DRAM2	ENSG00000156171	DNA damage regulated autophagy modulator 2	chr1	111117163	111140203	-1	p13.3	protein_coding
0.0041832	0.161	131.91	86.37	1.53	225877_at	TYSND1	ENSG00000156521	trypsin like peroxisomal matrix peptidase 1	chr10	70137981	70146700	-1	q22.1	protein_coding
0.0038931	0.161	26.69	69.16	0.39	1556368_at	PHKG2	ENSG00000156873	phosphorylase kinase catalytic subunit gamma 2	chr16	30748293	30761176	1	p11.2	protein_coding
0.005825	0.165	32.12	81.01	0.4	1556369_a_at	PHKG2	ENSG00000156873	phosphorylase kinase catalytic subunit gamma 2	chr16	30748293	30761176	1	p11.2	protein_coding
0.0022912	0.161	536.59	274.07	1.96	202705_at	CCNB2	ENSG00000157456	cyclin B2	chr15	59105126	59125045	1	q22.2	protein_coding
0.0082965	0.178	145.98	77.41	1.89	230448_at	SLC38A10	ENSG00000157637	solute carrier family 38 member 10	chr17	81244811	81295547	-1	q25.3	protein_coding
0.0065823	0.169	149.99	328.1	0.46	225445_at	UBN2	ENSG00000157741	ubinuclein 2	chr7	139230356	139308236	1	q34	protein_coding
0.0026515	0.161	109.98	239.42	0.46	238350_at	UBN2	ENSG00000157741	ubinuclein 2	chr7	139230356	139308236	1	q34	protein_coding
0.0087207	0.178	605.92	882.82	0.69	220917_s_at	WDR19	ENSG00000157796	WD repeat domain 19	chr4	39182504	39285810	1	p14	protein_coding
0.0014168	0.161	413.12	84.4	4.89	221019_s_at	COLEC12	ENSG00000158270	collectin subfamily member 12	chr18	316737	500722	-1	p11.32	protein_coding
0.0029877	0.161	67.5	37.33	1.81	205167_s_at	CDC25C	ENSG00000158402	cell division cycle 25C	chr5	138285269	138338355	-1	q31.2	protein_coding
0.0016281	0.161	123.88	206.6	0.6	214314_s_at	EIF5B	ENSG00000158417	eukaryotic translation initiation factor 5B	chr2	99337371	99401326	1	q11.2	protein_coding
0.0038964	0.161	126.32	227.27	0.56	214313_s_at	EIF5B	ENSG00000158417	eukaryotic translation initiation factor 5B	chr2	99337371	99401326	1	q11.2	protein_coding
0.0009922	0.161	1715.6	2838.08	0.6	201024_x_at	EIF5B	ENSG00000158417	eukaryotic translation initiation factor 5B	chr2	99337371	99401326	1	q11.2	protein_coding
0.0018259	0.161	21.88	11.39	1.92	205789_at	CD1D	ENSG00000158473	CD1d molecule	chr1	158178030	158186427	1	q23.1	protein_coding
0.0092769	0.18	149.29	38.25	3.9	219386_s_at	SLAMF8	ENSG00000158714	SLAM family member 8	chr1	159826811	159837492	1	q23.2	protein_coding
0.0033604	0.161	1052.29	700.6	1.5	201621_at	NBL1; MICOS10-NBL1	ENSG00000158747	NBL1, DAN family BMP antagonist	chr1	19596979	19658456	1	p36.13	protein_coding
0.0023134	0.161	1056.66	81.86	12.91	1554899_s_at	FCER1G	ENSG00000158869	Fc fragment of IgE receptor Ig	chr1	161215234	161220699	1	q23.3	protein_coding
0.0027308	0.161	1487.38	151.22	9.84	204232_at	FCER1G	ENSG00000158869	Fc fragment of IgE receptor Ig	chr1	161215234	161220699	1	q23.3	protein_coding
0.0089832	0.18	189.63	121.61	1.56	226059_at	TOMM40L	ENSG00000158882	translocase of outer mitochondrial membrane 40 like	chr1	161225939	161230746	1	q23.3	protein_coding
0.0053052	0.164	168.81	421.06	0.4	225627_s_at	CACHD1	ENSG00000158966	cache domain containing 1	chr1	64470129	64693058	1	p31.3	protein_coding
0.0074677	0.173	31.4	61.82	0.51	244822_at	GART	ENSG00000159131	phosphoribosylglycinamide formyltransferase, phosphoribosylglycinamide synthetase, phosphoribosylaminoimidazole synthetase	chr21	33503931	33543491	-1	q22.11	protein_coding
0.0042093	0.161	75.95	229	0.33	230097_at	GART	ENSG00000159131	phosphoribosylglycinamide formyltransferase, phosphoribosylglycinamide synthetase, phosphoribosylaminoimidazole synthetase	chr21	33503931	33543491	-1	q22.11	protein_coding
0.0005584	0.142	1569.32	133.6	11.75	225353_s_at	C1QC	ENSG00000159189	complement C1q C chain	chr1	22643633	22648110	1	p36.12	protein_coding
0.0092837	0.18	79.65	141.14	0.56	1569320_at	GPBP1L1	ENSG00000159592	GC-rich promoter binding protein 1 like 1	chr1	45627304	45688113	-1	p34.1	protein_coding
0.0015288	0.161	27.67	57.74	0.48	233091_at	ATAD3B	ENSG00000160072	ATPase family AAA domain containing 3B	chr1	1471765	1497848	1	p36.33	protein_coding
0.0065805	0.169	84.85	38.06	2.23	228410_at	GAB3	ENSG00000160219	GRB2 associated binding protein 3	chrX	154675249	154751583	-1	q28	protein_coding
0.004724	0.161	437.94	58.02	7.55	1555349_a_at	ITGB2	ENSG00000160255	integrin subunit beta 2	chr21	44885953	44931989	-1	q22.3	protein_coding
0.0053683	0.164	777.26	89.88	8.65	202803_s_at	ITGB2	ENSG00000160255	integrin subunit beta 2	chr21	44885953	44931989	-1	q22.3	protein_coding
0.0069004	0.17	125.92	69.54	1.81	224846_at	SHKBP1	ENSG00000160410	SH3KBP1 binding protein 1	chr19	40576853	40591399	1	q13.2	protein_coding
0.0050102	0.162	328.51	209.16	1.57	226516_at	MFSD12	ENSG00000161091	major facilitator superfamily domain containing 12	chr19	3538261	3574290	-1	p13.3	protein_coding
0.0032549	0.161	52.19	29.89	1.75	204210_s_at	PCYT1A	ENSG00000161217	phosphate cytidylyltransferase 1A, choline	chr3	196214222	196287957	-1	q29	protein_coding
0.0099988	0.181	96.63	276.98	0.35	204570_at	COX7A1	ENSG00000161281	cytochrome c oxidase subunit 7A1	chr19	36150922	36152449	-1	q13.12	protein_coding
0.0093988	0.18	55.32	88.36	0.63	1556715_at	PRPSAP1	ENSG00000161542	phosphoribosyl pyrophosphate synthetase associated protein 1	chr17	76309478	76384521	-1	q25.1	protein_coding
0.0072653	0.172	95.24	61.32	1.55	226111_s_at	ZNF385A	ENSG00000161642	zinc finger protein 385A	chr12	54369133	54391298	-1	q13.13	protein_coding
0.0024918	0.161	65.17	135.62	0.48	215114_at	SENP3	ENSG00000161956	SUMO specific peptidase 3	chr17	7561919	7571969	1	p13.1	protein_coding
0.0019984	0.161	495.46	262.88	1.88	224735_at	CYB561A3	ENSG00000162144	cytochrome b561 family member A3	chr11	61348754	61362283	-1	q12.2	protein_coding
0.0081465	0.177	365.27	820.93	0.44	203068_at	KLHL21	ENSG00000162413	kelch like family member 21	chr1	6590724	6614607	-1	p36.31	protein_coding
0.0099835	0.181	70.74	115.06	0.61	1555483_x_at	FBLIM1	ENSG00000162458	filamin binding LIM protein 1	chr1	15756607	15786594	1	p36.21	protein_coding
0.0047998	0.161	1269.29	442.34	2.87	202481_at	DHRS3	ENSG00000162496	dehydrogenase/reductase 3	chr1	12567910	12618210	-1	p36.21	protein_coding
0.00575	0.165	1578.84	208.08	7.59	201720_s_at	LAPTM5	ENSG00000162511	lysosomal protein transmembrane 5	chr1	30732469	30757774	-1	p35.2	protein_coding
0.0026726	0.161	3164.27	273.91	11.55	201721_s_at	LAPTM5	ENSG00000162511	lysosomal protein transmembrane 5	chr1	30732469	30757774	-1	p35.2	protein_coding
0.0015417	0.161	213.04	425.21	0.5	239071_at	RBBP4	ENSG00000162521	RB binding protein 4, chromatin remodeling factor	chr1	32651142	32686211	1	p35.1	protein_coding
0.0063793	0.169	118.11	237.63	0.5	244872_at	RBBP4	ENSG00000162521	RB binding protein 4, chromatin remodeling factor	chr1	32651142	32686211	1	p35.1	protein_coding
0.004419	0.161	182.85	315.88	0.58	237333_at	RBBP4	ENSG00000162521	RB binding protein 4, chromatin remodeling factor	chr1	32651142	32686211	1	p35.1	protein_coding
0.0053164	0.164	340.94	678.14	0.5	214093_s_at	FUBP1	ENSG00000162613	far upstream element binding protein 1	chr1	77944055	77979110	-1	p31.1	protein_coding
0.0040738	0.161	39.56	16.15	2.45	216015_s_at	NLRP3	ENSG00000162711	NLR family pyrin domain containing 3	chr1	247416156	247449108	1	q44	protein_coding
0.0045768	0.161	14.88	6.86	2.17	216016_at	NLRP3	ENSG00000162711	NLR family pyrin domain containing 3	chr1	247416156	247449108	1	q44	protein_coding
9.12e-05	0.12	373.46	63.56	5.88	207075_at	NLRP3	ENSG00000162711	NLR family pyrin domain containing 3	chr1	247416156	247449108	1	q44	protein_coding
0.0022938	0.161	59.86	20.7	2.89	238452_at	FCRLB	ENSG00000162746	Fc receptor like B	chr1	161721563	161728143	1	q23.3	protein_coding
0.002433	0.161	213.69	29.66	7.2	204007_at	FCGR3B	ENSG00000162747	Fc fragment of IgG receptor IIIb	chr1	161623196	161631963	-1	q23.3	protein_coding
0.0019007	0.161	100.93	13.96	7.23	204006_s_at	FCGR3B	ENSG00000162747	Fc fragment of IgG receptor IIIb	chr1	161623196	161631963	-1	q23.3	protein_coding
0.0024035	0.161	1227.77	1948.03	0.63	219286_s_at	RBM15	ENSG00000162775	RNA binding motif protein 15	chr1	110338506	110346681	1	p13.3	protein_coding
0.0049483	0.161	95.98	154.73	0.62	225551_at	CNST	ENSG00000162852	consortin, connexin sorting protein	chr1	246566444	246668595	1	q44	protein_coding
0.0023998	0.161	287.57	523.81	0.55	226233_at	B3GALNT2	ENSG00000162885	beta-1,3-N-acetylgalactosaminyltransferase 2	chr1	235447190	235504452	-1	q42.3	protein_coding
0.0036668	0.161	158.29	88.02	1.8	221601_s_at	FCMR	ENSG00000162894	Fc fragment of IgM receptor	chr1	206903317	206923247	-1	q32.1	protein_coding
0.0001905	0.12	134.82	273.24	0.49	214888_at	CAPN2	ENSG00000162909	calpain 2	chr1	223701593	223776018	1	q41	protein_coding
0.0009333	0.161	49.11	204.99	0.24	203698_s_at	FRZB	ENSG00000162998	frizzled related protein	chr2	182833275	182866637	-1	q32.1	protein_coding
0.0037266	0.161	26.07	146.55	0.18	203697_at	FRZB	ENSG00000162998	frizzled related protein	chr2	182833275	182866637	-1	q32.1	protein_coding
0.0072334	0.171	69.85	115.06	0.61	235259_at	PACRGL	ENSG00000163138	parkin coregulated like	chr4	20696282	20752907	1	p15.31	protein_coding
0.0042127	0.161	74.69	160.42	0.47	205016_at	TGFA	ENSG00000163235	transforming growth factor alpha	chr2	70447284	70554193	-1	p13.3	protein_coding
0.0070866	0.171	125.08	52.86	2.37	228497_at	SLC22A15	ENSG00000163393	solute carrier family 22 member 15	chr1	115976513	116070054	1	p13.1	protein_coding
0.0062548	0.169	908.05	1960.31	0.46	220987_s_at	NUAK2	ENSG00000163545	NUAK family kinase 2	chr1	205302063	205321745	-1	q32.1	protein_coding
0.0031427	0.161	92.84	11.43	8.13	204959_at	MNDA	ENSG00000163563	myeloid cell nuclear differentiation antigen	chr1	158831351	158849506	1	q23.1	protein_coding
0.0045818	0.161	17.98	31.2	0.58	228108_at	PPM1L	ENSG00000163590	protein phosphatase, Mg2+/Mn2+ dependent 1L	chr3	160755602	161078902	1	q25.33	protein_coding
0.0064918	0.169	927.66	1591.32	0.58	225519_at	PPP4R2	ENSG00000163605	protein phosphatase 4 regulatory subunit 2	chr3	72996803	73069198	1	p13	protein_coding
0.0079388	0.176	64.06	107.5	0.6	215101_s_at	CXCL5	ENSG00000163735	C-X-C motif chemokine ligand 5	chr4	73995642	73998677	-1	q13.3	protein_coding
0.0055782	0.165	525.83	360.18	1.46	201554_x_at	GYG1	ENSG00000163754	glycogenin 1	chr3	148991408	149031775	1	q24	protein_coding
0.0024578	0.161	941.54	73.41	12.83	205098_at	CCR1	ENSG00000163823	C-C motif chemokine receptor 1	chr3	46201711	46208313	-1	p21.31	protein_coding
0.0066382	0.169	273.14	54.3	5.03	205099_s_at	CCR1	ENSG00000163823	C-C motif chemokine receptor 1	chr3	46201711	46208313	-1	p21.31	protein_coding
0.0077266	0.175	180.8	112.31	1.61	226074_at	PPM1M	ENSG00000164088	protein phosphatase, Mg2+/Mn2+ dependent 1M	chr3	52245759	52250599	1	p21.2	protein_coding
0.0094972	0.18	2541.87	1438.99	1.77	224602_at	C4orf3	ENSG00000164096	chromosome 4 open reading frame 3	chr4	119296419	119304445	-1	q26	protein_coding
0.00547	0.165	147.06	84.62	1.74	1554806_a_at	FBXO8	ENSG00000164117	F-box protein 8	chr4	174236658	174283667	-1	q34.1	protein_coding
0.0022868	0.161	294.11	1000.43	0.29	213506_at	F2RL1	ENSG00000164251	F2R like trypsin receptor 1	chr5	76818933	76835315	1	q13.3	protein_coding
0.0097557	0.181	22.85	36.49	0.63	206429_at	F2RL1	ENSG00000164251	F2R like trypsin receptor 1	chr5	76818933	76835315	1	q13.3	protein_coding
0.009236	0.18	120.44	79.41	1.52	222661_at	AGGF1	ENSG00000164252	angiogenic factor with G-patch and FHA domains 1	chr5	77029251	77065234	1	q13.3	protein_coding
0.0077493	0.175	155.62	81.8	1.9	218055_s_at	WDR41	ENSG00000164253	WD repeat domain 41	chr5	77425970	77620611	-1	q14.1	protein_coding
0.009976	0.181	63.78	43.18	1.48	210385_s_at	ERAP1	ENSG00000164307	endoplasmic reticulum aminopeptidase 1	chr5	96760810	96808100	-1	q15	protein_coding
0.0086077	0.178	80.58	41.62	1.94	239587_at	TLR3	ENSG00000164342	toll like receptor 3	chr4	186069155	186088073	1	q35.1	protein_coding
0.0053316	0.164	350.32	213.59	1.64	207980_s_at	CITED2	ENSG00000164442	Cbp/p300 interacting transactivator with Glu/Asp rich carboxy-terminal domain 2	chr6	139371807	139374648	-1	q24.1	protein_coding
0.0040275	0.161	165.68	81.54	2.03	1554229_at	CREBRF	ENSG00000164463	CREB3 regulatory factor	chr5	173056352	173139284	1	q35.1	protein_coding
0.009943	0.181	127.05	179.44	0.71	219571_s_at	ZNF12	ENSG00000164631	zinc finger protein 12	chr7	6688433	6706947	-1	p22.1	protein_coding
0.0012552	0.161	28.82	14.41	2	242388_x_at	TAGAP	ENSG00000164691	T cell activation RhoGTPase activating protein	chr6	159034468	159045152	-1	q25.3	protein_coding
0.0022169	0.161	106.97	16.45	6.5	229723_at	TAGAP	ENSG00000164691	T cell activation RhoGTPase activating protein	chr6	159034468	159045152	-1	q25.3	protein_coding
0.0065525	0.169	5998.62	2139.23	2.8	200838_at	CTSB	ENSG00000164733	cathepsin B	chr8	11842524	11869533	-1	p23.1	protein_coding
0.0082081	0.177	98.82	296.69	0.33	206487_at	SUN1	ENSG00000164828	Sad1 and UNC84 domain containing 1	chr7	816615	896435	1	p22.3	protein_coding
0.0043314	0.161	305.9	503.72	0.61	226715_at	FOXK1	ENSG00000164916	forkhead box K1	chr7	4682295	4771442	1	p22.1	protein_coding
0.0057811	0.165	66.52	39.99	1.66	216066_at	ABCA1	ENSG00000165029	ATP binding cassette subfamily A member 1	chr9	104781006	104928155	-1	q31.1	protein_coding
0.0039458	0.161	1101.64	425.29	2.59	203504_s_at	ABCA1	ENSG00000165029	ATP binding cassette subfamily A member 1	chr9	104781006	104928155	-1	q31.1	protein_coding
0.0085489	0.178	137.1	327.39	0.42	1553986_at	RASEF	ENSG00000165105	RAS and EF-hand domain containing	chr9	82979590	83063177	-1	q21.32	protein_coding
0.0076598	0.175	143.89	81.48	1.77	224458_at	PGAP4	ENSG00000165152	post-GPI attachment to proteins GalNAc transferase 4	chr9	101473170	101533537	-1	q31.1	protein_coding
0.0027375	0.161	384.18	38.71	9.92	203922_s_at	CYBB	ENSG00000165168	cytochrome b-245 beta chain	chrX	37780059	37813461	1	p21.1	protein_coding
0.002331	0.161	1018.96	91.12	11.18	203923_s_at	CYBB	ENSG00000165168	cytochrome b-245 beta chain	chrX	37780059	37813461	1	p21.1	protein_coding
0.0069273	0.171	125.15	231.97	0.54	39249_at	AQP3	ENSG00000165272	aquaporin 3 (Gill blood group)	chr9	33441156	33447596	-1	p13.3	protein_coding
0.0008516	0.161	443.12	1770.46	0.25	39248_at	AQP3	ENSG00000165272	aquaporin 3 (Gill blood group)	chr9	33441156	33447596	-1	p13.3	protein_coding
0.0048993	0.161	237.78	139.81	1.7	231035_s_at	OTUD1	ENSG00000165312	OTU deubiquitinase 1	chr10	23439075	23442377	1	p12.2	protein_coding
0.0008854	0.161	1568.65	918.01	1.71	226140_s_at	OTUD1	ENSG00000165312	OTU deubiquitinase 1	chr10	23439075	23442377	1	p12.2	protein_coding
0.0062294	0.169	56.05	118.56	0.47	227506_at	SLC16A9	ENSG00000165449	solute carrier family 16 member 9	chr10	59650764	59736002	-1	q21.2	protein_coding
0.0062325	0.169	15.51	10.05	1.54	236646_at	TMEM52B	ENSG00000165685	transmembrane protein 52B	chr12	10170542	10191804	1	p13.2	protein_coding
0.0075674	0.173	174.03	297.39	0.59	213653_at	METTL3	ENSG00000165819	methyltransferase 3, N6-adenosine-methyltransferase complex catalytic subunit	chr14	21498133	21511342	-1	q11.2	protein_coding
0.0098569	0.181	93.6	56.05	1.67	219889_at	FRAT1	ENSG00000165879	FRAT regulator of WNT signaling pathway 1	chr10	97319271	97321915	1	q24.1	protein_coding
0.0013532	0.161	349	165.5	2.11	226007_at	ISCA2	ENSG00000165898	iron-sulfur cluster assembly 2	chr14	74493756	74497106	1	q24.3	protein_coding
0.0008403	0.161	300.72	1015.29	0.3	218750_at	TAF1D	ENSG00000166012	TATA-box binding protein associated factor, RNA polymerase I subunit D	chr11	93729948	93784391	-1	q21	protein_coding
0.0092907	0.18	1177.2	2384.75	0.49	222728_s_at	TAF1D	ENSG00000166012	TATA-box binding protein associated factor, RNA polymerase I subunit D	chr11	93729948	93784391	-1	q21	protein_coding
0.0086432	0.178	371.72	149.5	2.49	226633_at	RAB8B	ENSG00000166128	RAB8B, member RAS oncogene family	chr15	63189560	63267776	1	q22.2	protein_coding
0.0077682	0.175	184.76	410.55	0.45	235546_at	SPINT1	ENSG00000166145	serine peptidase inhibitor, Kunitz type 1	chr15	40844018	40858207	1	q15.1	protein_coding
0.0055542	0.165	2023.52	1102.71	1.84	200055_at	TAF10	ENSG00000166337	TATA-box binding protein associated factor 10	chr11	6606294	6612539	-1	p15.4	protein_coding
0.0014791	0.161	1836.82	394.42	4.66	200743_s_at	TPP1	ENSG00000166340	tripeptidyl peptidase 1	chr11	6612768	6619448	-1	p15.4	protein_coding
0.0003174	0.132	219.53	116.88	1.88	219953_s_at	AKIP1	ENSG00000166452	A-kinase interacting protein 1	chr11	8911139	8920084	1	p15.4	protein_coding
0.0009963	0.161	206.47	38.15	5.41	209685_s_at	PRKCB	ENSG00000166501	protein kinase C beta	chr16	23835983	24220611	1	p12.2	protein_coding
0.0018041	0.161	89.57	23.35	3.84	207957_s_at	PRKCB	ENSG00000166501	protein kinase C beta	chr16	23835983	24220611	1	p12.2	protein_coding
0.006504	0.169	40.49	16.46	2.46	227817_at	PRKCB	ENSG00000166501	protein kinase C beta	chr16	23835983	24220611	1	p12.2	protein_coding
0.0046467	0.161	1208.15	654	1.85	224779_s_at	CIAO2A	ENSG00000166797	cytosolic iron-sulfur assembly component 2A	chr15	64072565	64093857	-1	q22.31	protein_coding
0.0082356	0.178	1301.34	651.52	2	202503_s_at	PCLAF	ENSG00000166803	PCNA clamp associated factor	chr15	64364304	64387687	-1	q22.31	protein_coding
0.0060644	0.168	249.39	453.56	0.55	227586_at	TMEM170A	ENSG00000166822	transmembrane protein 170A	chr16	75443054	75465497	-1	q23.1	protein_coding
0.0020272	0.161	603.33	1176.8	0.51	209238_at	STX3	ENSG00000166900	syntaxin 3	chr11	59713456	59805882	1	q12.1	protein_coding
0.0046454	0.161	50.05	34.26	1.46	220286_at	MTMR10	ENSG00000166912	myotubularin related protein 10	chr15	30938941	30991628	-1	q13.3	protein_coding
0.0031771	0.161	51.99	88.61	0.59	1554501_at	TSC22D4	ENSG00000166925	TSC22 domain family member 4	chr7	100463359	100479232	-1	q22.1	protein_coding
0.0034455	0.161	442.43	1082.37	0.41	218284_at	SMAD3	ENSG00000166949	SMAD family member 3	chr15	67063763	67195173	1	q22.33	protein_coding
0.0033909	0.161	138.57	87.88	1.58	215640_at	TBC1D2B	ENSG00000167202	TBC1 domain family member 2B	chr15	77984036	78077724	-1	q25.1	protein_coding
0.0044043	0.161	146.31	51.92	2.82	213539_at	CD3D	ENSG00000167286	CD3d molecule	chr11	118339075	118342705	-1	q23.3	protein_coding
0.0044086	0.161	26.46	63.53	0.42	1553292_s_at	RSKR	ENSG00000167524	ribosomal protein S6 kinase related	chr17	28601827	28614197	-1	q11.2	protein_coding
0.0041781	0.161	61.31	38.68	1.58	223385_at	CYP2S1	ENSG00000167600	cytochrome P450 family 2 subfamily S member 1	chr19	41193210	41207539	1	q13.2	protein_coding
0.006775	0.17	307.91	46.53	6.62	210644_s_at	LAIR1	ENSG00000167613	leukocyte associated immunoglobulin like receptor 1	chr19	54351384	54370558	-1	q13.42	protein_coding
0.0047218	0.161	971.22	592.16	1.64	223012_at	UBXN6	ENSG00000167671	UBX domain protein 6	chr19	4444999	4457794	-1	p13.3	protein_coding
0.0042207	0.161	363.04	218.81	1.66	220757_s_at	UBXN6	ENSG00000167671	UBX domain protein 6	chr19	4444999	4457794	-1	p13.3	protein_coding
0.0068392	0.17	125.31	223.2	0.56	239042_at	TSR1	ENSG00000167721	TSR1 ribosome maturation factor	chr17	2322396	2336657	-1	p13.3	protein_coding
0.0017202	0.161	55.15	112.51	0.49	236429_at	ZNF83	ENSG00000167766	zinc finger protein 83	chr19	52594060	52690504	-1	q13.41	protein_coding
0.0045678	0.161	994.61	183.6	5.42	203851_at	IGFBP6	ENSG00000167779	insulin like growth factor binding protein 6	chr12	53097436	53102345	1	q13.13	protein_coding
0.0078887	0.176	207.03	301.12	0.69	215067_x_at	PRDX2	ENSG00000167815	peroxiredoxin 2	chr19	12796820	12801800	-1	p13.13	protein_coding
0.003075	0.161	488.4	67.95	7.19	209933_s_at	CD300A	ENSG00000167851	CD300a molecule	chr17	74466399	74484794	1	q25.1	protein_coding
0.0068975	0.17	300.31	188.93	1.59	1554408_a_at	TK1	ENSG00000167900	thymidine kinase 1	chr17	78174091	78187233	-1	q25.3	protein_coding
0.0083764	0.178	3977.48	9097.77	0.44	224569_s_at	IRF2BP2	ENSG00000168264	interferon regulatory factor 2 binding protein 2	chr1	234604269	234610178	-1	q42.3	protein_coding
0.0090063	0.18	1009.45	1820.51	0.55	224572_s_at	IRF2BP2	ENSG00000168264	interferon regulatory factor 2 binding protein 2	chr1	234604269	234610178	-1	q42.3	protein_coding
0.0034488	0.161	885.57	338.62	2.62	217764_s_at	RAB31	ENSG00000168461	RAB31, member RAS oncogene family	chr18	9708275	9862551	1	p11.22	protein_coding
0.009258	0.18	832.92	347.06	2.4	217762_s_at	RAB31	ENSG00000168461	RAB31, member RAS oncogene family	chr18	9708275	9862551	1	p11.22	protein_coding
0.0027621	0.161	53.57	83.65	0.64	1553274_a_at	SNRNP48	ENSG00000168566	small nuclear ribonucleoprotein U11/U12 subunit 48	chr6	7590198	7611967	1	p24.3	protein_coding
0.0042844	0.161	86.51	48.95	1.77	226796_at	ABHD15	ENSG00000168792	abhydrolase domain containing 15	chr17	29560547	29567037	-1	q11.2	protein_coding
0.0077345	0.175	40.25	87.14	0.46	227312_at	SNTB2	ENSG00000168807	syntrophin beta 2	chr16	69187147	69309052	1	q22.1	protein_coding
0.0013631	0.161	188.87	78	2.42	203332_s_at	INPP5D	ENSG00000168918	inositol polyphosphate-5-phosphatase D	chr2	233059967	233207903	1	q37.1	protein_coding
0.0053959	0.164	100.16	21.1	4.75	207224_s_at	SIGLEC7	ENSG00000168995	sialic acid binding Ig like lectin 7	chr19	51142299	51153526	1	q13.41	protein_coding
0.007929	0.176	18.65	50.73	0.37	225809_at	PARM1	ENSG00000169116	prostate androgen-regulated mucin-like protein 1	chr4	74933095	75050115	1	q13.3	protein_coding
0.006963	0.171	58.62	134.62	0.44	204687_at	PARM1	ENSG00000169116	prostate androgen-regulated mucin-like protein 1	chr4	74933095	75050115	1	q13.3	protein_coding
0.0065665	0.169	80.34	17.39	4.62	206111_at	RNASE2	ENSG00000169385	ribonuclease A family member 2	chr14	20955487	20956436	1	q11.2	protein_coding
0.0029349	0.161	495.96	47.41	10.46	213566_at	RNASE6	ENSG00000169413	ribonuclease A family member k6	chr14	20781268	20782467	1	q11.2	protein_coding
0.0039973	0.161	201.18	25	8.05	34210_at	CD52	ENSG00000169442	CD52 molecule	chr1	26317958	26320523	1	p36.11	protein_coding
0.0013103	0.161	359.54	91.15	3.94	205419_at	GPR183	ENSG00000169508	G protein-coupled receptor 183	chr13	99294539	99307399	-1	q32.3	protein_coding
0.0091837	0.18	147.31	71.87	2.05	209642_at	BUB1	ENSG00000169679	BUB1 mitotic checkpoint serine/threonine kinase	chr2	110637528	110678063	-1	q13	protein_coding
0.00626	0.169	1448.69	893.04	1.62	205480_s_at	UGP2	ENSG00000169764	UDP-glucose pyrophosphorylase 2	chr2	63840952	63891562	1	p15	protein_coding
0.0014506	0.161	331.25	32.62	10.15	205786_s_at	ITGAM	ENSG00000169896	integrin subunit alpha M	chr16	31259967	31332892	1	p11.2	protein_coding
0.0016997	0.161	105.77	418.89	0.25	215033_at	TM4SF1	ENSG00000169908	transmembrane 4 L six family member 1	chr3	149369022	149377692	-1	q25.1	protein_coding
0.0042732	0.161	95.28	42.26	2.25	238063_at	TMEM154	ENSG00000170006	transmembrane protein 154	chr4	152618628	152680012	-1	q31.3	protein_coding
0.0027585	0.161	3000.12	1531.44	1.96	1555889_a_at	CRTAP	ENSG00000170275	cartilage associated protein	chr3	33114014	33147773	1	p22.3	protein_coding
0.008567	0.178	7041.6	4233.04	1.66	200645_at	GABARAP	ENSG00000170296	GABA type A receptor-associated protein	chr17	7240008	7242449	-1	p13.1	protein_coding
0.0015806	0.161	400.07	242.81	1.65	203213_at	CDK1	ENSG00000170312	cyclin dependent kinase 1	chr10	60778331	60794852	1	q21.2	protein_coding
0.0052636	0.164	250.04	141.17	1.77	210559_s_at	CDK1	ENSG00000170312	cyclin dependent kinase 1	chr10	60778331	60794852	1	q21.2	protein_coding
0.0031244	0.161	259.28	138.94	1.87	203214_x_at	CDK1	ENSG00000170312	cyclin dependent kinase 1	chr10	60778331	60794852	1	q21.2	protein_coding
0.0070716	0.171	2677.75	1623.01	1.65	212352_s_at	TMED10	ENSG00000170348	transmembrane p24 trafficking protein 10	chr14	75131469	75176612	-1	q24.3	protein_coding
0.0009869	0.161	4369.71	1704.69	2.56	212907_at	SLC30A1	ENSG00000170385	solute carrier family 30 member 1	chr1	211571568	211579161	-1	q32.3	protein_coding
0.0033123	0.161	2169.07	235.54	9.21	201743_at	CD14	ENSG00000170458	CD14 molecule	chr5	140631728	140633701	-1	q31.3	protein_coding
0.0012583	0.161	490.37	82.43	5.95	226789_at	EMB	ENSG00000170571	embigin	chr5	50396192	50443248	-1	q11.1	protein_coding
0.0083255	0.178	37.83	18.59	2.03	227711_at	GTSF1	ENSG00000170627	gametocyte specific factor 1	chr12	54455950	54473602	-1	q13.13	protein_coding
0.0001996	0.12	774.16	68.26	11.34	205119_s_at	FPR1	ENSG00000171051	formyl peptide receptor 1	chr19	51745172	51804110	-1	q13.41	protein_coding
0.0090516	0.18	21.4	39.45	0.54	1552897_a_at	KCNG3	ENSG00000171126	potassium voltage-gated channel modifier subfamily G member 3	chr2	42442017	42493982	-1	p21	protein_coding
0.0013022	0.161	84.86	23.93	3.55	1554485_s_at	TMEM37	ENSG00000171227	transmembrane protein 37	chr2	119429901	119438504	1	q14.2	protein_coding
0.0017962	0.161	101.66	49.15	2.07	219493_at	SHCBP1	ENSG00000171241	SHC binding and spindle associated 1	chr16	46578591	46621379	-1	q11.2	protein_coding
0.0044792	0.161	2811.08	1585.78	1.77	200886_s_at	PGAM1	ENSG00000171314	phosphoglycerate mutase 1	chr10	97426191	97433444	1	q24.1	protein_coding
0.0027652	0.161	25.4	14.33	1.77	207935_s_at	KRT13	ENSG00000171401	keratin 13	chr17	41500981	41505705	-1	q21.2	protein_coding
0.0028506	0.161	244.83	144.34	1.7	214440_at	NAT1	ENSG00000171428	N-acetyltransferase 1	chr8	18170477	18223689	1	p22	protein_coding
0.0085183	0.178	71.62	44.41	1.61	227246_at	PLRG1	ENSG00000171566	pleiotropic regulator 1	chr4	154535005	154550400	-1	q31.3	protein_coding
0.0010825	0.161	96.72	12.2	7.93	223620_at	GPR34	ENSG00000171659	G protein-coupled receptor 34	chrX	41688973	41697275	1	p11.4	protein_coding
0.0050474	0.162	54.75	123.54	0.44	213268_at	CAMTA1	ENSG00000171735	calmodulin binding transcription activator 1	chr1	6785454	7769706	1	p36.31	protein_coding
0.0081917	0.177	281.03	164.51	1.71	225837_at	RHNO1	ENSG00000171792	RAD9-HUS1-RAD1 interacting nuclear orphan 1	chr12	2876258	2889524	1	p13.33	protein_coding
0.003377	0.161	608.47	251.12	2.42	209773_s_at	RRM2	ENSG00000171848	ribonucleotide reductase regulatory subunit M2	chr2	10120698	10211725	1	p25.1	protein_coding
0.0044806	0.161	428.38	67.26	6.37	209906_at	C3AR1	ENSG00000171860	complement C3a receptor 1	chr12	8056844	8066359	-1	p13.31	protein_coding
0.0065387	0.169	532.96	326.28	1.63	228628_at	SRGAP2C	ENSG00000171943	SLIT-ROBO Rho GTPase activating protein 2C	chr1	121184811	121392874	1	p11.2	protein_coding
0.002635	0.161	349.23	173.61	2.01	225530_at	MOB3A	ENSG00000172081	MOB kinase activator 3A	chr19	2071036	2096673	-1	p13.3	protein_coding
0.0080626	0.176	330.01	45.93	7.18	205428_s_at	CALB2	ENSG00000172137	calbindin 2	chr16	71358713	71390436	1	q22.2	protein_coding
0.0067015	0.17	288.53	77.43	3.73	221698_s_at	CLEC7A	ENSG00000172243	C-type lectin domain containing 7A	chr12	10116777	10130258	-1	p13.2	protein_coding
0.0004169	0.139	101.6	9.53	10.66	1555756_a_at	CLEC7A	ENSG00000172243	C-type lectin domain containing 7A	chr12	10116777	10130258	-1	p13.2	protein_coding
0.0026448	0.161	255.81	48.28	5.3	1554406_a_at	CLEC7A	ENSG00000172243	C-type lectin domain containing 7A	chr12	10116777	10130258	-1	p13.2	protein_coding
0.0049579	0.161	62.37	129.17	0.48	228507_at	PDE3A	ENSG00000172572	phosphodiesterase 3A	chr12	20368537	20688583	1	p12.2	protein_coding
0.0071449	0.171	69.76	127.5	0.55	236300_at	PDE3A	ENSG00000172572	phosphodiesterase 3A	chr12	20368537	20688583	1	p12.2	protein_coding
4.03e-05	0.12	296.5	46.52	6.37	213624_at	SMPDL3A	ENSG00000172594	sphingomyelin phosphodiesterase acid like 3A	chr6	122789049	122809720	1	q22.31	protein_coding
0.0031337	0.161	56.55	143.18	0.39	237016_at	TMEM217	ENSG00000172738	transmembrane protein 217	chr6	37212178	37258155	-1	p21.2	protein_coding
0.0039425	0.161	100.91	60.1	1.68	244777_at	DCP2	ENSG00000172795	decapping mRNA 2	chr5	112976702	113022195	1	q22.2	protein_coding
0.0058327	0.165	320.07	529.05	0.6	201791_s_at	DHCR7	ENSG00000172893	7-dehydrocholesterol reductase	chr11	71428193	71452868	-1	q13.4	protein_coding
0.0068286	0.17	53.71	34.66	1.55	222881_at	HPSE	ENSG00000173083	heparanase	chr4	83292461	83335153	-1	q21.23	protein_coding
0.0048407	0.161	243.76	114.29	2.13	219403_s_at	HPSE	ENSG00000173083	heparanase	chr4	83292461	83335153	-1	q21.23	protein_coding
0.0057261	0.165	306.35	174.85	1.75	213379_at	COQ2	ENSG00000173085	coenzyme Q2, polyprenyltransferase	chr4	83261536	83284914	-1	q21.23	protein_coding
0.001411	0.161	3524.81	838.82	4.2	213418_at	HSPA6	ENSG00000173110	heat shock protein family A (Hsp70) member 6	chr1	161524540	161526894	1	q23.3	protein_coding
0.0030056	0.161	1066.2	264.68	4.03	117_at	HSPA6	ENSG00000173110	heat shock protein family A (Hsp70) member 6	chr1	161524540	161526894	1	q23.3	protein_coding
0.0026564	0.161	55.59	25.54	2.18	231747_at	CYSLTR1	ENSG00000173198	cysteinyl leukotriene receptor 1	chrX	78271468	78327691	-1	q21.1	protein_coding
0.00473	0.161	19.05	7.97	2.39	1564310_a_at	PARP15	ENSG00000173200	poly(ADP-ribose) polymerase family member 15	chr3	122577628	122639047	1	q21.1	protein_coding
0.0058565	0.166	1121.16	468.22	2.39	206662_at	GLRX	ENSG00000173221	glutaredoxin	chr5	95751319	95822726	-1	q15	protein_coding
0.0085637	0.178	156.8	100.4	1.56	228968_at	ZNF449	ENSG00000173275	zinc finger protein 449	chrX	135344796	135363413	1	q26.3	protein_coding
0.0001811	0.12	1992.45	91.17	21.85	202953_at	C1QB	ENSG00000173369	complement C1q B chain	chr1	22652762	22661637	1	p36.12	protein_coding
0.0001733	0.12	1732.7	105.76	16.38	218232_at	C1QA	ENSG00000173372	complement C1q A chain	chr1	22636628	22639678	1	p36.12	protein_coding
0.0009733	0.161	220.88	42.36	5.21	210004_at	OLR1	ENSG00000173391	oxidized low density lipoprotein receptor 1	chr12	10158301	10172138	-1	p13.2	protein_coding
0.0079733	0.176	820.13	1275.21	0.64	201072_s_at	SMARCC1	ENSG00000173473	SWI/SNF related, matrix associated, actin dependent regulator of chromatin subfamily c member 1	chr3	47585269	47782106	-1	p21.31	protein_coding
0.0091024	0.18	24.03	57.95	0.41	214297_at	CSPG4	ENSG00000173546	chondroitin sulfate proteoglycan 4	chr15	75674322	75712848	-1	q24.2	protein_coding
0.0068168	0.17	178.1	313.08	0.57	243751_at	CHD2	ENSG00000173575	chromodomain helicase DNA binding protein 2	chr15	92900189	93027996	1	q26.1	protein_coding
0.0025835	0.161	803.04	1232.74	0.65	225077_at	CHD2	ENSG00000173575	chromodomain helicase DNA binding protein 2	chr15	92900189	93027996	1	q26.1	protein_coding
0.0019583	0.161	196.62	350.83	0.56	203921_at	CHST2	ENSG00000175040	carbohydrate sulfotransferase 2	chr3	143119771	143124014	1	q24	protein_coding
0.0055066	0.165	231.68	159.97	1.45	204488_at	DOLK	ENSG00000175283	dolichol kinase	chr9	128945530	128947603	-1	q34.11	protein_coding
0.004476	0.161	331.89	213.04	1.56	219281_at	MSRA	ENSG00000175806	methionine sulfoxide reductase A	chr8	10054292	10428891	1	p23.1	protein_coding
0.0091504	0.18	149.97	420.66	0.36	230769_at	DENND2C	ENSG00000175984	DENN domain containing 2C	chr1	114582848	114670422	-1	p13.2	protein_coding
0.0070784	0.171	653.78	367.62	1.78	201848_s_at	BNIP3	ENSG00000176171	BCL2 interacting protein 3	chr10	131967684	131981967	-1	q26.3	protein_coding
0.0013324	0.161	470.55	261.81	1.8	223367_at	DNAJC30	ENSG00000176410	DnaJ heat shock protein family (Hsp40) member C30	chr7	73680918	73683453	-1	q11.23	protein_coding
0.0073808	0.172	88	140.37	0.63	1557948_at	PHLDB3	ENSG00000176531	pleckstrin homology like domain family B member 3	chr19	43474954	43504935	-1	q13.31	protein_coding
0.0060299	0.167	2667.45	1004.43	2.66	202391_at	BASP1	ENSG00000176788	brain abundant membrane attached signal protein 1	chr5	17065598	17276843	1	p15.1	protein_coding
0.0089344	0.18	65.21	544.57	0.12	218541_s_at	TCIM	ENSG00000176907	transcriptional and immune response regulator	chr8	40153482	40155310	1	p11.21	protein_coding
0.0001768	0.12	138.55	302.81	0.46	212200_at	ANKLE2	ENSG00000176915	ankyrin repeat and LEM domain containing 2	chr12	132725503	132761832	-1	q24.33	protein_coding
0.0047887	0.161	224.16	446.39	0.5	212201_at	ANKLE2	ENSG00000176915	ankyrin repeat and LEM domain containing 2	chr12	132725503	132761832	-1	q24.33	protein_coding
0.0029373	0.161	41.88	102.84	0.41	229515_at	PAWR	ENSG00000177425	pro-apoptotic WT1 regulator	chr12	79574979	79690964	-1	q21.2	protein_coding
0.0003213	0.132	2666.11	163.4	16.32	203645_s_at	CD163	ENSG00000177575	CD163 molecule	chr12	7470811	7503893	-1	p13.31	protein_coding
0.0006159	0.148	2435.6	158.14	15.4	215049_x_at	CD163	ENSG00000177575	CD163 molecule	chr12	7470811	7503893	-1	p13.31	protein_coding
0.0084832	0.178	172.06	102.86	1.67	228685_at	IL17RA	ENSG00000177663	interleukin 17 receptor A	chr22	17084954	17115694	1	q11.1	protein_coding
0.0044404	0.161	1183.87	583.14	2.03	226722_at	FAM20C	ENSG00000177706	FAM20C golgi associated secretory pathway kinase	chr7	192571	260772	1	p22.3	protein_coding
0.0044974	0.161	20.69	10.77	1.92	215575_at	PDE4DIP	ENSG00000178104	phosphodiesterase 4D interacting protein	chr1	148808181	149048286	1	q21.2	protein_coding
0.0046568	0.161	614.69	188.23	3.27	212390_at	PDE4DIP	ENSG00000178104	phosphodiesterase 4D interacting protein	chr1	148808181	149048286	1	q21.2	protein_coding
0.0005251	0.142	275.97	114.09	2.42	209348_s_at	MAF	ENSG00000178573	MAF bZIP transcription factor	chr16	79585843	79600737	-1	q23.2	protein_coding
0.0002476	0.131	102.09	38.18	2.67	229327_s_at	MAF	ENSG00000178573	MAF bZIP transcription factor	chr16	79585843	79600737	-1	q23.2	protein_coding
0.0073356	0.172	173.48	57.21	3.03	206363_at	MAF	ENSG00000178573	MAF bZIP transcription factor	chr16	79585843	79600737	-1	q23.2	protein_coding
0.0096028	0.18	63.73	37.82	1.69	224495_at	TMEM107	ENSG00000179029	transmembrane protein 107	chr17	8172457	8176399	-1	p13.1	protein_coding
0.0038801	0.161	30.07	57.73	0.52	243161_x_at	ZFP42	ENSG00000179059	ZFP42 zinc finger protein	chr4	187995771	188005046	1	q35.2	protein_coding
0.0004875	0.141	606.91	130.33	4.66	212998_x_at	HLA-DQB1	ENSG00000179344	major histocompatibility complex, class II, DQ beta 1	chr6	32659467	32668383	-1	p21.32	protein_coding
0.0045094	0.161	136.8	54.75	2.5	212999_x_at	HLA-DQB1	ENSG00000179344	major histocompatibility complex, class II, DQ beta 1	chr6	32659467	32668383	-1	p21.32	protein_coding
0.0019093	0.161	991.62	322.34	3.08	211654_x_at	HLA-DQB1	ENSG00000179344	major histocompatibility complex, class II, DQ beta 1	chr6	32659467	32668383	-1	p21.32	protein_coding
0.0004163	0.139	656.86	158.95	4.13	209823_x_at	HLA-DQB1	ENSG00000179344	major histocompatibility complex, class II, DQ beta 1	chr6	32659467	32668383	-1	p21.32	protein_coding
0.000675	0.157	1150.36	304.5	3.78	211656_x_at	HLA-DQB1	ENSG00000179344	major histocompatibility complex, class II, DQ beta 1	chr6	32659467	32668383	-1	p21.32	protein_coding
0.0068574	0.17	11.46	20.04	0.57	240771_at	CATSPERE	ENSG00000179397	catsper channel auxiliary subunit epsilon	chr1	244454377	244641177	1	q44	protein_coding
0.0049382	0.161	13.95	25.14	0.55	242540_at	DNHD1	ENSG00000179532	dynein heavy chain domain 1	chr11	6497260	6593758	1	p15.4	protein_coding
0.0062527	0.169	160.93	84.67	1.9	228298_at	PCED1B	ENSG00000179715	PC-esterase domain containing 1B	chr12	47079603	47236662	1	q13.11	protein_coding
0.0007496	0.161	53.33	99.67	0.54	1568640_at	PCBP1-AS1	ENSG00000179818	PCBP1 antisense RNA 1	chr2	69960104	70103220	-1	p13.3	lncRNA
0.0025826	0.161	90.8	199.14	0.46	235482_at	PCBP1-AS1	ENSG00000179818	PCBP1 antisense RNA 1	chr2	69960104	70103220	-1	p13.3	lncRNA
0.0081529	0.177	126.39	85.09	1.49	227978_s_at	PTGR3	ENSG00000180011	zinc binding alcohol dehydrogenase domain containing 2	chr18	75195113	75209139	-1	q22.3	protein_coding
0.003817	0.161	697.77	113.98	6.12	202957_at	HCLS1	ENSG00000180353	hematopoietic cell-specific Lyn substrate 1	chr3	121631399	121660927	-1	q13.33	protein_coding
0.008577	0.178	314.37	186.55	1.69	212246_at	MCFD2	ENSG00000180398	multiple coagulation factor deficiency 2, ER cargo receptor complex subunit	chr2	46901870	46941855	-1	p21	protein_coding
0.0083513	0.178	353.61	568.32	0.62	227970_at	GPR157	ENSG00000180758	G protein-coupled receptor 157	chr1	9100305	9129102	-1	p36.22	protein_coding
0.0069093	0.17	75.72	120.71	0.63	220901_at	GPR157	ENSG00000180758	G protein-coupled receptor 157	chr1	9100305	9129102	-1	p36.22	protein_coding
0.0013523	0.161	47.54	30.31	1.57	239647_at	CHST13	ENSG00000180767	carbohydrate sulfotransferase 13	chr3	126524155	126543291	1	q21.3	protein_coding
0.0096408	0.18	104.39	75.66	1.38	242838_at	MAP6D1	ENSG00000180834	MAP6 domain containing 1	chr3	183815922	183825594	-1	q27.1	protein_coding
0.0036878	0.161	54.1	178.52	0.3	239203_at	LSMEM1	ENSG00000181016	leucine rich single-pass membrane protein 1	chr7	112480853	112491062	1	q31.1	protein_coding
0.0042721	0.161	33.52	78.72	0.43	1569852_at	LSMEM1	ENSG00000181016	leucine rich single-pass membrane protein 1	chr7	112480853	112491062	1	q31.1	protein_coding
0.0080531	0.176	1140.42	701.24	1.63	225870_s_at	TRAPPC5	ENSG00000181029	trafficking protein particle complex subunit 5	chr19	7680833	7687703	1	p13.2	protein_coding
0.0026845	0.161	982.22	654.81	1.5	225808_at	METTL23	ENSG00000181038	methyltransferase like 23	chr17	76726830	76733936	1	q25.1	protein_coding
0.0096588	0.18	752.49	510.67	1.47	35626_at	SGSH	ENSG00000181523	N-sulfoglucosamine sulfohydrolase	chr17	80206716	80220923	-1	q25.3	protein_coding
0.0009594	0.161	84.95	37.73	2.25	229686_at	P2RY8	ENSG00000182162	P2Y receptor family member 8	chrX	1462581	1537185	-1	p22.33	protein_coding
0.0094193	0.18	249.19	155.26	1.6	210886_x_at	-	ENSG00000182165	TP53 target 1	chr7	87322943	87345552	-1	q21.12	lncRNA
0.0090743	0.18	164.86	98.2	1.68	209917_s_at	-	ENSG00000182165	TP53 target 1	chr7	87322943	87345552	-1	q21.12	lncRNA
0.001551	0.161	316.21	61.51	5.14	203104_at	CSF1R	ENSG00000182578	colony stimulating factor 1 receptor	chr5	150053291	150113372	-1	q32	protein_coding
0.0014894	0.161	249.37	114.79	2.17	225686_at	SKA2	ENSG00000182628	spindle and kinetochore associated complex subunit 2	chr17	59109857	59155260	-1	q22	protein_coding
0.0044677	0.161	1462.67	848.58	1.72	225684_at	SKA2	ENSG00000182628	spindle and kinetochore associated complex subunit 2	chr17	59109857	59155260	-1	q22	protein_coding
0.0036987	0.161	72.74	34.35	2.12	228128_x_at	PAPPA	ENSG00000182752	pappalysin 1	chr9	116153791	116402321	1	q33.1	protein_coding
0.001253	0.161	109.18	44.8	2.44	224942_at	PAPPA	ENSG00000182752	pappalysin 1	chr9	116153791	116402321	1	q33.1	protein_coding
0.0048504	0.161	191.49	45.24	4.23	235751_s_at	VMO1	ENSG00000182853	vitelline membrane outer layer 1 homolog	chr17	4785285	4786433	-1	p13.2	protein_coding
0.0040025	0.161	449.61	798.99	0.56	209081_s_at	COL18A1	ENSG00000182871	collagen type XVIII alpha 1 chain	chr21	45405165	45513720	1	q22.3	protein_coding
0.0010302	0.161	136.45	72.3	1.89	209459_s_at	ABAT	ENSG00000183044	4-aminobutyrate aminotransferase	chr16	8674596	8784575	1	p13.2	protein_coding
0.0078224	0.175	153.68	211.61	0.73	206954_at	-	ENSG00000183242	WT1 antisense RNA	chr11	32435518	32500632	1	p13	lncRNA
0.0073746	0.172	4311.85	2828.43	1.52	206790_s_at	NDUFB1	ENSG00000183648	NADH:ubiquinone oxidoreductase subunit B1	chr14	92116122	92121917	-1	q32.12	protein_coding
0.0073613	0.172	11.36	31.72	0.36	228875_at	FAM162B	ENSG00000183807	family with sequence similarity 162 member B	chr6	116752197	116765719	-1	q22.1	protein_coding
0.0080258	0.176	50.33	87.42	0.58	1554528_at	CFAP91	ENSG00000183833	cilia and flagella associated protein 91	chr3	119703022	119767102	1	q13.33	protein_coding
0.0049455	0.161	25.41	46.04	0.55	1554147_s_at	CFAP91	ENSG00000183833	cilia and flagella associated protein 91	chr3	119703022	119767102	1	q13.33	protein_coding
0.0039339	0.161	24.8	43.11	0.58	1555719_a_at	CFAP91	ENSG00000183833	cilia and flagella associated protein 91	chr3	119703022	119767102	1	q13.33	protein_coding
0.0021772	0.161	398.93	734.96	0.54	222243_s_at	TOB2	ENSG00000183864	transducer of ERBB2, 2	chr22	41433494	41446801	-1	q13.2	protein_coding
0.0048074	0.161	213.37	55.24	3.86	222876_s_at	ADAP2	ENSG00000184060	ArfGAP with dual PH domains 2	chr17	30906344	30959322	1	q11.2	protein_coding
0.0023639	0.161	21.88	50.19	0.44	236700_at	EIF3C	ENSG00000184110	eukaryotic translation initiation factor 3 subunit C	chr16	28688558	28735727	1	p11.2	protein_coding
0.0074357	0.173	2083.2	1278.71	1.63	201587_s_at	IRAK1	ENSG00000184216	interleukin 1 receptor associated kinase 1	chrX	154010506	154019902	-1	q28	protein_coding
0.0066164	0.169	276.15	129.65	2.13	207808_s_at	PROS1	ENSG00000184500	protein S	chr3	93873051	93980003	-1	q11.1	protein_coding
0.001683	0.161	121.99	68.94	1.77	226661_at	CDCA2	ENSG00000184661	cell division cycle associated 2	chr8	25459199	25507911	1	p21.2	protein_coding
0.0093135	0.18	30.27	42.36	0.71	237810_at	CLDN6	ENSG00000184697	claudin 6	chr16	3014712	3020071	-1	p13.3	protein_coding
0.0049122	0.161	194.46	124	1.57	223824_at	RNLS	ENSG00000184719	renalase, FAD dependent amine oxidase	chr10	88273864	88584530	-1	q23.31	protein_coding
0.0068798	0.17	2640.78	1711.76	1.54	200740_s_at	SUMO3	ENSG00000184900	small ubiquitin like modifier 3	chr21	44805617	44818779	-1	q22.3	protein_coding
0.0062358	0.169	16	28.57	0.56	221852_at	LOC102723728; NOMO2	ENSG00000185164	NODAL modulator 2	chr16	18417325	18562211	-1	p12.3	protein_coding
0.0004533	0.14	25.88	51.78	0.5	229413_s_at	PCGF3	ENSG00000185619	polycomb group ring finger 3	chr4	705748	770640	1	p16.3	protein_coding
0.003811	0.161	78.67	130.69	0.6	230408_at	PCGF3	ENSG00000185619	polycomb group ring finger 3	chr4	705748	770640	1	p16.3	protein_coding
0.0055965	0.165	6555.49	3914.63	1.67	200654_at	P4HB	ENSG00000185624	prolyl 4-hydroxylase subunit beta	chr17	81843159	81860856	-1	q25.3	protein_coding
0.0005439	0.142	63.86	117.57	0.54	219280_at	BRWD1	ENSG00000185658	bromodomain and WD repeat domain containing 1	chr21	39184176	39321559	-1	q22.2	protein_coding
0.0090456	0.18	238.17	346.9	0.69	33768_at	DMWD	ENSG00000185800	DM1 locus, WD repeat containing	chr19	45782947	45792845	-1	q13.32	protein_coding
0.002361	0.161	52.8	12.82	4.12	227346_at	IKZF1	ENSG00000185811	IKAROS family zinc finger 1	chr7	50304068	50405101	1	p12.2	protein_coding
0.0038479	0.161	275.73	108.57	2.54	205039_s_at	IKZF1	ENSG00000185811	IKAROS family zinc finger 1	chr7	50304068	50405101	1	p12.2	protein_coding
0.0033794	0.161	9.24	16.53	0.56	1567862_at	DNAH14	ENSG00000185842	dynein axonemal heavy chain 14	chr1	224896262	225399292	1	q42.12	protein_coding
0.004346	0.161	98.45	18.01	5.47	211742_s_at	EVI2B	ENSG00000185862	ecotropic viral integration site 2B	chr17	31303770	31314105	-1	q11.2	protein_coding
0.0035847	0.161	13.08	5.27	2.48	1559584_a_at	C16orf54	ENSG00000185905	chromosome 16 open reading frame 54	chr16	29742463	29745990	-1	p11.2	protein_coding
0.0071095	0.171	319.62	655.71	0.49	226975_at	RNPC3	ENSG00000185946	RNA binding region (RNP1, RRM) containing 3	chr1	103525691	103555239	1	p21.1	protein_coding
0.0034462	0.161	81.36	168.7	0.48	1559490_at	LRCH3	ENSG00000186001	leucine rich repeats and calponin homology domain containing 3	chr3	197791226	197888436	1	q29	protein_coding
0.0027843	0.161	73.58	18.84	3.91	1553043_a_at	CD300LF	ENSG00000186074	CD300 molecule like family member f	chr17	74694311	74712978	-1	q25.1	protein_coding
0.0065808	0.169	121.97	178.61	0.68	227616_at	BCL9L	ENSG00000186174	BCL9 like	chr11	118893875	118925926	-1	q23.3	protein_coding
0.0091674	0.18	50.23	34.44	1.46	1553286_at	ZNF555	ENSG00000186300	zinc finger protein 555	chr19	2841437	2860471	1	p13.3	protein_coding
0.0084118	0.178	80.45	223.32	0.36	227702_at	CYP4X1	ENSG00000186377	cytochrome P450 family 4 subfamily X member 1	chr1	47023669	47050751	1	p33	protein_coding
0.0014821	0.161	152.95	27.2	5.62	224964_s_at	GNG2	ENSG00000186469	G protein subunit gamma 2	chr14	51826195	51979342	1	q22.1	protein_coding
0.0066277	0.169	229.58	447.07	0.51	226637_at	UBE2H	ENSG00000186591	ubiquitin conjugating enzyme E2 H	chr7	129830732	129952960	-1	q32.2	protein_coding
0.0043802	0.161	642.54	1225.09	0.52	221962_s_at	UBE2H	ENSG00000186591	ubiquitin conjugating enzyme E2 H	chr7	129830732	129952960	-1	q32.2	protein_coding
0.0061009	0.168	741.42	1176.14	0.63	217799_x_at	UBE2H	ENSG00000186591	ubiquitin conjugating enzyme E2 H	chr7	129830732	129952960	-1	q32.2	protein_coding
0.0065801	0.169	113.97	205.04	0.56	228927_at	ZNF397	ENSG00000186812	zinc finger protein 397	chr18	35241030	35267133	1	q12.2	protein_coding
0.004508	0.161	68.82	15.82	4.35	215838_at	LILRA5	ENSG00000187116	leukocyte immunoglobulin like receptor A5	chr19	54307070	54313166	-1	q13.42	protein_coding
0.0066785	0.17	41.79	9.92	4.21	1555643_s_at	LILRA5	ENSG00000187116	leukocyte immunoglobulin like receptor A5	chr19	54307070	54313166	-1	q13.42	protein_coding
0.0070626	0.171	32.14	21.04	1.53	227763_at	LYPD6	ENSG00000187123	LY6/PLAUR domain containing 6	chr2	149329985	149474138	1	q23.2	protein_coding
0.0075511	0.173	20109.1	6177.89	3.26	208581_x_at	MT1X	ENSG00000187193	metallothionein 1X	chr16	56682470	56684196	1	q13	protein_coding
0.0014874	0.161	224.58	31.33	7.17	230422_at	FPR3	ENSG00000187474	formyl peptide receptor 3	chr19	51795157	51826190	1	q13.41	protein_coding
0.0039775	0.161	699.65	2634.55	0.27	211980_at	COL4A1	ENSG00000187498	collagen type IV alpha 1 chain	chr13	110148963	110307157	-1	q34	protein_coding
0.0049315	0.161	155.94	502.37	0.31	211981_at	COL4A1	ENSG00000187498	collagen type IV alpha 1 chain	chr13	110148963	110307157	-1	q34	protein_coding
0.0070851	0.171	273.09	583.38	0.47	227347_x_at	HES4	ENSG00000188290	hes family bHLH transcription factor 4	chr1	998962	1000172	-1	p36.33	protein_coding
0.0046191	0.161	48.78	14.87	3.28	204563_at	SELL	ENSG00000188404	selectin L	chr1	169690665	169711702	-1	q24.2	protein_coding
0.0023766	0.161	166.97	301.17	0.55	226552_at	IER5L	ENSG00000188483	immediate early response 5 like	chr9	129175552	129178261	-1	q34.11	protein_coding
0.0036129	0.161	175.19	64.87	2.7	204646_at	DPYD	ENSG00000188641	dihydropyrimidine dehydrogenase	chr1	97077743	97995000	-1	p21.3	protein_coding
0.0018776	0.161	13.48	31.73	0.42	1568638_a_at	IDO2	ENSG00000188676	indoleamine 2,3-dioxygenase 2	chr8	39934614	40016397	1	p11.21	protein_coding
0.0093529	0.18	137.49	58.77	2.34	37966_at	PARVB	ENSG00000188677	parvin beta	chr22	43999211	44172939	1	q13.31	protein_coding
0.0022753	0.161	160.54	100.56	1.6	1553718_at	ZNF548	ENSG00000188785	zinc finger protein 548	chr19	57389850	57402992	1	q13.43	protein_coding
0.0022224	0.161	176.66	308.46	0.57	221646_s_at	ZDHHC11	ENSG00000188818	zinc finger DHHC-type containing 11	chr5	795605	858973	-1	p15.33	protein_coding
0.0063205	0.169	37.41	67.35	0.56	1552283_s_at	ZDHHC11	ENSG00000188818	zinc finger DHHC-type containing 11	chr5	795605	858973	-1	p15.33	protein_coding
0.0016603	0.161	269.33	79.99	3.37	229390_at	CALHM6	ENSG00000188820	calcium homeostasis modulator family member 6	chr6	116461370	116463771	1	q22.1	protein_coding
0.0028718	0.161	320.46	130.91	2.45	229391_s_at	CALHM6	ENSG00000188820	calcium homeostasis modulator family member 6	chr6	116461370	116463771	1	q22.1	protein_coding
0.0045288	0.161	650.77	368.08	1.77	212708_at	MSL1	ENSG00000188895	MSL complex subunit 1	chr17	40121971	40136917	1	q21.1	protein_coding
0.0096575	0.18	316.02	178.59	1.77	244050_at	HACD4	ENSG00000188921	3-hydroxyacyl-CoA dehydratase 4	chr9	20999509	21031640	-1	p21.3	protein_coding
0.0072004	0.171	63.28	101.78	0.62	229564_at	RRP7A	ENSG00000189306	ribosomal RNA processing 7 homolog A	chr22	42508344	42519796	-1	q13.2	protein_coding
0.0079473	0.176	500.94	1343.99	0.37	218677_at	S100A14	ENSG00000189334	S100 calcium binding protein A14	chr1	153614255	153616986	-1	q21.3	protein_coding
0.0060013	0.167	104.22	44.67	2.33	205541_s_at	GSPT2	ENSG00000189369	G1 to S phase transition 2	chrX	51743442	51746232	1	p11.22	protein_coding
0.0042564	0.161	6414.06	2030.61	3.16	215193_x_at	HLA-DRB1	ENSG00000196126	major histocompatibility complex, class II, DR beta 1	chr6	32578769	32589848	-1	p21.32	protein_coding
0.0046714	0.161	11120	3872.86	2.87	209312_x_at	HLA-DRB1	ENSG00000196126	major histocompatibility complex, class II, DR beta 1	chr6	32578769	32589848	-1	p21.32	protein_coding
0.0097449	0.181	197.62	380.22	0.52	228549_at	TMEM63A	ENSG00000196187	transmembrane protein 63A	chr1	225845536	225882380	-1	q42.12	protein_coding
0.008032	0.176	149.84	80.03	1.87	235496_at	HRCT1	ENSG00000196196	histidine rich carboxyl terminus 1	chr9	35906202	35907136	1	p13.3	protein_coding
0.0063314	0.169	53.57	33.96	1.58	227910_at	XPNPEP3	ENSG00000196236	X-prolyl aminopeptidase 3	chr22	40857077	40932815	1	q13.2	protein_coding
0.0023405	0.161	1702.93	3903.05	0.44	201926_s_at	CD55	ENSG00000196352	CD55 molecule (Cromer blood group)	chr1	207321532	207386804	1	q32.2	protein_coding
0.0059462	0.166	3547.88	7595.43	0.47	1555950_a_at	CD55	ENSG00000196352	CD55 molecule (Cromer blood group)	chr1	207321532	207386804	1	q32.2	protein_coding
0.0024603	0.161	1283.85	3312.76	0.39	201925_s_at	CD55	ENSG00000196352	CD55 molecule (Cromer blood group)	chr1	207321532	207386804	1	q32.2	protein_coding
0.0030233	0.161	77.98	238.34	0.33	240557_at	TSC22D2	ENSG00000196428	TSC22 domain family member 2	chr3	150408298	150466422	1	q25.1	protein_coding
0.0037537	0.161	1084.56	2083.23	0.52	204094_s_at	TSC22D2	ENSG00000196428	TSC22 domain family member 2	chr3	150408298	150466422	1	q25.1	protein_coding
0.0087629	0.178	192.39	476.03	0.4	222018_at	NACA	ENSG00000196531	nascent polypeptide associated complex subunit alpha	chr12	56712305	56731628	-1	q13.3	protein_coding
0.0097928	0.181	537.91	1239.48	0.43	203215_s_at	MYO6	ENSG00000196586	myosin VI	chr6	75749201	75919537	1	q14.1	protein_coding
0.0072065	0.171	127.77	266.25	0.48	210480_s_at	MYO6	ENSG00000196586	myosin VI	chr6	75749201	75919537	1	q14.1	protein_coding
0.0002645	0.132	49.16	517.04	0.095	204475_at	MMP1	ENSG00000196611	matrix metallopeptidase 1	chr11	102789401	102798160	-1	q22.2	protein_coding
0.0050554	0.162	1158.43	792.55	1.46	218167_at	AMZ2	ENSG00000196704	archaelysin family metallopeptidase 2	chr17	68205481	68257712	1	q24.2	protein_coding
0.0005785	0.143	1056.4	308.33	3.43	203139_at	DAPK1	ENSG00000196730	death associated protein kinase 1	chr9	87497228	87708634	1	q21.33	protein_coding
0.0097289	0.181	189.44	102.51	1.85	235678_at	GM2A	ENSG00000196743	GM2 ganglioside activator	chr5	151212150	151270440	1	q33.1	protein_coding
0.0030253	0.161	2032.73	858.21	2.37	212737_at	GM2A	ENSG00000196743	GM2 ganglioside activator	chr5	151212150	151270440	1	q33.1	protein_coding
0.0017324	0.161	900.54	377.69	2.38	35820_at	GM2A	ENSG00000196743	GM2 ganglioside activator	chr5	151212150	151270440	1	q33.1	protein_coding
0.0032651	0.161	67.47	42.63	1.58	33646_g_at	GM2A	ENSG00000196743	GM2 ganglioside activator	chr5	151212150	151270440	1	q33.1	protein_coding
0.0048394	0.161	469.1	1355.08	0.35	204268_at	S100A2	ENSG00000196754	S100 calcium binding protein A2	chr1	153561108	153567890	-1	q21.3	protein_coding
0.0018086	0.161	1433.3	2709.62	0.53	203221_at	TLE1	ENSG00000196781	TLE family member 1, transcriptional corepressor	chr9	81583683	81689547	-1	q21.32	protein_coding
0.002394	0.161	146.35	273.46	0.54	203222_s_at	TLE1	ENSG00000196781	TLE family member 1, transcriptional corepressor	chr9	81583683	81689547	-1	q21.32	protein_coding
0.007476	0.173	159.57	99.73	1.6	52975_at	MVB12B	ENSG00000196814	multivesicular body subunit 12B	chr9	126326829	126507041	1	q33.3	protein_coding
0.0080386	0.176	293.36	194.85	1.51	204639_at	ADA	ENSG00000196839	adenosine deaminase	chr20	44619522	44652233	-1	q13.12	protein_coding
0.0003373	0.132	723.85	3402.79	0.21	209270_at	LAMB3	ENSG00000196878	laminin subunit beta 3	chr1	209614870	209652425	-1	q32.2	protein_coding
0.0096589	0.18	8.45	13.53	0.62	234544_at	ARHGEF12	ENSG00000196914	Rho guanine nucleotide exchange factor 12	chr11	120336413	120489937	1	q23.3	protein_coding
0.005392	0.164	88.68	49.9	1.78	219815_at	GAL3ST4	ENSG00000197093	galactose-3-O-sulfotransferase 4	chr7	100159244	100168617	-1	q22.1	protein_coding
0.0056716	0.165	271.01	467.16	0.58	213517_at	PCBP2	ENSG00000197111	poly(rC) binding protein 2	chr12	53452102	53481162	1	q13.13	protein_coding
0.00579	0.165	29.44	49.96	0.59	1554770_x_at	ZNF785	ENSG00000197162	zinc finger protein 785	chr16	30573740	30585769	-1	p11.2	protein_coding
0.0032026	0.161	60.01	108.13	0.56	232480_at	MIRLET7BHG	ENSG00000197182	MIRLET7B host gene	chr22	46053869	46113928	1	q13.31	lncRNA
0.0021336	0.161	837.49	305.39	2.74	211429_s_at	SERPINA1	ENSG00000197249	serpin family A member 1	chr14	94376747	94390693	-1	q32.13	protein_coding
0.0019655	0.161	310.73	119.54	2.6	202833_s_at	SERPINA1	ENSG00000197249	serpin family A member 1	chr14	94376747	94390693	-1	q32.13	protein_coding
0.0034053	0.161	56.36	97.02	0.58	214815_at	TRIM33	ENSG00000197323	tripartite motif containing 33	chr1	114392790	114511203	-1	p13.2	protein_coding
0.002762	0.161	865.52	158.01	5.48	220088_at	C5AR1	ENSG00000197405	complement C5a receptor 1	chr19	47290023	47322066	1	q13.32	protein_coding
0.0091351	0.18	147.12	288.27	0.51	205463_s_at	PDGFA	ENSG00000197461	platelet derived growth factor subunit A	chr7	497258	520296	-1	p22.3	protein_coding
0.0065213	0.169	190.9	314.96	0.61	216867_s_at	PDGFA	ENSG00000197461	platelet derived growth factor subunit A	chr7	497258	520296	-1	p22.3	protein_coding
0.0074989	0.173	243.48	96.48	2.52	227761_at	MYO5A	ENSG00000197535	myosin VA	chr15	52307281	52529132	-1	q21.2	protein_coding
0.0069371	0.171	177.22	67.12	2.64	204527_at	MYO5A	ENSG00000197535	myosin VA	chr15	52307281	52529132	-1	q21.2	protein_coding
0.0056335	0.165	300.84	161.47	1.86	224025_s_at	ATG7	ENSG00000197548	autophagy related 7	chr3	11272309	11557665	1	p25.3	protein_coding
0.004599	0.161	229.79	134.16	1.71	218673_s_at	ATG7	ENSG00000197548	autophagy related 7	chr3	11272309	11557665	1	p25.3	protein_coding
0.0016077	0.161	287.64	34.6	8.31	226841_at	MPEG1	ENSG00000197629	macrophage expressed 1	chr11	59208510	59212927	-1	q12.1	protein_coding
0.0013242	0.161	364.78	33.9	10.76	226818_at	MPEG1	ENSG00000197629	macrophage expressed 1	chr11	59208510	59212927	-1	q12.1	protein_coding
0.0075275	0.173	118.42	24.14	4.91	211478_s_at	DPP4	ENSG00000197635	dipeptidyl peptidase 4	chr2	161992245	162074394	-1	q24.2	protein_coding
0.0083813	0.178	160.03	44.05	3.63	203717_at	DPP4	ENSG00000197635	dipeptidyl peptidase 4	chr2	161992245	162074394	-1	q24.2	protein_coding
0.0014898	0.161	4750.43	1133.02	4.19	200866_s_at	PSAP	ENSG00000197746	prosaposin	chr10	71816298	71851251	-1	q22.1	protein_coding
0.0013382	0.161	16335	7006.16	2.33	200871_s_at	PSAP	ENSG00000197746	prosaposin	chr10	71816298	71851251	-1	q22.1	protein_coding
0.0014341	0.161	102.73	294.78	0.35	213459_at	RPL37A	ENSG00000197756	ribosomal protein L37a	chr2	216498825	216579180	1	q35	protein_coding
0.0007624	0.161	33.14	18.82	1.76	1569867_at	EME2	ENSG00000197774	essential meiotic structure-specific endonuclease subunit 2	chr16	1772810	1781708	1	p13.3	protein_coding
0.0017695	0.161	50.08	145.25	0.34	209925_at	OCLN	ENSG00000197822	occludin	chr5	69492292	69558104	1	q13.2	protein_coding
0.0051986	0.163	189.5	95.73	1.98	208092_s_at	CYRIA	ENSG00000197872	CYFIP related Rac1 interactor A	chr2	16549459	16666331	-1	p24.2	protein_coding
0.0001816	0.12	103.57	468.19	0.22	228923_at	S100A6	ENSG00000197956	S100 calcium binding protein A6	chr1	153534599	153536244	-1	q21.3	protein_coding
0.007704	0.175	50.86	95.37	0.53	209839_at	DNM3	ENSG00000197959	dynamin 3	chr1	171817887	172418466	1	q24.3	protein_coding
0.0025562	0.161	47.9	102.91	0.47	209072_at	MBP	ENSG00000197971	myelin basic protein	chr18	76978827	77133683	-1	q23	protein_coding
0.0006914	0.157	1238.66	3222.98	0.38	223773_s_at	SNHG12	ENSG00000197989	small nucleolar RNA host gene 12	chr1	28578538	28583132	-1	p35.3	lncRNA
0.0009919	0.161	333.25	720.48	0.46	223774_at	SNHG12	ENSG00000197989	small nucleolar RNA host gene 12	chr1	28578538	28583132	-1	p35.3	lncRNA
0.0007926	0.161	670.95	152.89	4.39	202897_at	SIRPA	ENSG00000198053	signal regulatory protein alpha	chr20	1894167	1940592	1	p13	protein_coding
0.002831	0.161	356.4	158.42	2.25	202896_s_at	SIRPA	ENSG00000198053	signal regulatory protein alpha	chr20	1894167	1940592	1	p13	protein_coding
0.0011817	0.161	204.84	95.87	2.14	205053_at	PRIM1	ENSG00000198056	DNA primase subunit 1	chr12	56731296	56752374	-1	q13.3	protein_coding
0.009454	0.18	6004.41	3343.68	1.8	205812_s_at	SULT1C4	ENSG00000198075	sulfotransferase family 1C member 4	chr2	108377911	108388989	1	q12.3	protein_coding
0.0094914	0.18	97.35	58.74	1.66	242939_at	TFDP1	ENSG00000198176	transcription factor Dp-1	chr13	113584721	113641473	1	q34	protein_coding
0.0025399	0.161	397.32	157.97	2.52	217989_at	HSD17B11	ENSG00000198189	hydroxysteroid 17-beta dehydrogenase 11	chr4	87336515	87391188	-1	q22.1	protein_coding
0.0001634	0.12	354.02	117.71	3.01	219344_at	SLC29A3	ENSG00000198246	solute carrier family 29 member 3	chr10	71319259	71381423	1	q22.1	protein_coding
0.0014691	0.161	889.12	1415.98	0.63	219981_x_at	ZNF587	ENSG00000198466	zinc finger protein 587	chr19	57849859	57865117	1	q13.43	protein_coding
0.0022596	0.161	5139.32	1789.25	2.87	204670_x_at	HLA-DRB5	ENSG00000198502	major histocompatibility complex, class II, DR beta 5	chr6	32517353	32530287	-1	p21.32	protein_coding
0.0096601	0.18	102.68	55.94	1.84	223340_at	ATL1	ENSG00000198513	atlastin GTPase 1	chr14	50532509	50634017	1	q22.1	protein_coding
0.0019005	0.161	1196.43	2628.23	0.46	226206_at	MAFK	ENSG00000198517	MAF bZIP transcription factor K	chr7	1530702	1543043	1	p22.3	protein_coding
0.0042054	0.161	77.78	31.67	2.46	210031_at	CD247	ENSG00000198821	CD247 molecule	chr1	167430640	167518610	-1	q24.2	protein_coding
0.0057851	0.165	122.49	183.44	0.67	233819_s_at	LTN1	ENSG00000198862	listerin E3 ubiquitin protein ligase 1	chr21	28928144	28992956	-1	q21.3	protein_coding
0.0032813	0.161	62.28	101.43	0.61	1566340_at	SNORD8	ENSG00000200785	small nucleolar RNA, C/D box 8	chr14	21397292	21397401	-1	q11.2	snoRNA
0.005031	0.162	113.93	30.44	3.74	237732_at	PRR9	ENSG00000203783	proline rich 9	chr1	153217584	153219310	1	q21.3	protein_coding
0.0072221	0.171	932.63	520.52	1.79	222670_s_at	MAFB	ENSG00000204103	MAF bZIP transcription factor B	chr20	40685848	40689236	-1	q12	protein_coding
0.0067678	0.17	1136.92	636.32	1.79	218559_s_at	MAFB	ENSG00000204103	MAF bZIP transcription factor B	chr20	40685848	40689236	-1	q12	protein_coding
0.0053004	0.164	38.6	57.45	0.67	240230_s_at	AGAP9	ENSG00000204172	ArfGAP with GTPase domain, ankyrin repeat and PH domain 9	chr10	47501854	47523638	-1	q11.22	protein_coding
0.0014758	0.161	269.23	117.87	2.28	226878_at	HLA-DOA	ENSG00000204252	major histocompatibility complex, class II, DO alpha	chr6	33004182	33009591	-1	p21.32	protein_coding
0.0052574	0.164	6212.89	1581.1	3.93	210982_s_at	HLA-DRA	ENSG00000204287	major histocompatibility complex, class II, DR alpha	chr6	32439878	32445046	1	p21.32	protein_coding
0.0041103	0.161	6599.71	1644.2	4.01	208894_at	HLA-DRA	ENSG00000204287	major histocompatibility complex, class II, DR alpha	chr6	32439878	32445046	1	p21.32	protein_coding
0.007991	0.176	28.35	170.6	0.17	203477_at	COL15A1	ENSG00000204291	collagen type XV alpha 1 chain	chr9	98943179	99070792	1	q22.33	protein_coding
0.0024727	0.161	217.84	92.61	2.35	1552701_a_at	CARD16	ENSG00000204397	caspase recruitment domain family member 16	chr11	105041326	105101431	-1	q22.3	protein_coding
0.009433	0.18	96.17	48.08	2	1552703_s_at	CARD16	ENSG00000204397	caspase recruitment domain family member 16	chr11	105041326	105101431	-1	q22.3	protein_coding
0.0010955	0.161	1441.86	137.97	10.45	213095_x_at	AIF1	ENSG00000204472	allograft inflammatory factor 1	chr6	31615217	31617021	1	p21.33	protein_coding
0.0010218	0.161	1835.68	205.01	8.95	215051_x_at	AIF1	ENSG00000204472	allograft inflammatory factor 1	chr6	31615217	31617021	1	p21.33	protein_coding
0.0003332	0.132	1668.14	108.97	15.31	209901_x_at	AIF1	ENSG00000204472	allograft inflammatory factor 1	chr6	31615217	31617021	1	p21.33	protein_coding
0.0042489	0.161	316.94	29.4	10.78	211582_x_at	LST1	ENSG00000204482	leukocyte specific transcript 1	chr6	31586124	31588909	1	p21.33	protein_coding
0.00551	0.165	398.23	53.54	7.44	210629_x_at	LST1	ENSG00000204482	leukocyte specific transcript 1	chr6	31586124	31588909	1	p21.33	protein_coding
0.0081438	0.177	287.39	36.86	7.8	211581_x_at	LST1	ENSG00000204482	leukocyte specific transcript 1	chr6	31586124	31588909	1	p21.33	protein_coding
0.0051072	0.162	280.96	32.85	8.55	214181_x_at	LST1	ENSG00000204482	leukocyte specific transcript 1	chr6	31586124	31588909	1	p21.33	protein_coding
0.0042039	0.161	344.63	43.14	7.99	215633_x_at	LST1	ENSG00000204482	leukocyte specific transcript 1	chr6	31586124	31588909	1	p21.33	protein_coding
0.0062194	0.169	468.99	52.22	8.98	214574_x_at	LST1	ENSG00000204482	leukocyte specific transcript 1	chr6	31586124	31588909	1	p21.33	protein_coding
0.0041242	0.161	267.04	435.49	0.61	212118_at	TRIM27	ENSG00000204713	tripartite motif containing 27	chr6	28903002	28923988	-1	p22.1	protein_coding
0.0085638	0.178	32.91	61.2	0.54	236105_at	ZBTB10	ENSG00000205189	zinc finger and BTB domain containing 10	chr8	80485619	80526265	1	q21.13	protein_coding
0.0039831	0.161	568.45	277.49	2.05	202113_s_at	SNX2	ENSG00000205302	sorting nexin 2	chr5	122775079	122834543	1	q23.2	protein_coding
0.0054891	0.165	361.39	215.25	1.68	202114_at	SNX2	ENSG00000205302	sorting nexin 2	chr5	122775079	122834543	1	q23.2	protein_coding
0.008251	0.178	13273.8	4532.87	2.93	206461_x_at	MT1H	ENSG00000205358	metallothionein 1H	chr16	56669814	56671129	1	q13	protein_coding
0.0095892	0.18	33.37	53.93	0.62	229306_at	C2CD4B	ENSG00000205502	C2 calcium dependent domain containing 4B	chr15	62163535	62165285	-1	q22.2	protein_coding
0.0068891	0.17	80.77	130.02	0.62	1556567_at	NAP1L4	ENSG00000205531	nucleosome assembly protein 1 like 4	chr11	2944431	2992377	-1	p15.4	protein_coding
0.0028904	0.161	42.05	24.77	1.7	209298_s_at	ITSN1	ENSG00000205726	intersectin 1	chr21	33642400	33899861	1	q22.11	protein_coding
0.0052751	0.164	39.5	18.8	2.1	209813_x_at	-	ENSG00000211695	T cell receptor gamma variable 9	chr7	38317017	38318861	-1	p14.1	TR_V_gene
0.0021496	0.161	372.66	120.38	3.1	213193_x_at	-	ENSG00000211751	T cell receptor beta constant 1	chr7	142791694	142793368	1	q34	TR_C_gene
0.0009604	0.161	256.96	72.82	3.53	210915_x_at	-	ENSG00000211751	T cell receptor beta constant 1	chr7	142791694	142793368	1	q34	TR_C_gene
0.004155	0.161	41.61	81.66	0.51	239434_at	CEP43	ENSG00000213066	centrosomal protein 43	chr6	166999317	167094789	1	q27	protein_coding
0.0017786	0.161	767.57	394.91	1.94	224864_at	SRA1	ENSG00000213523	steroid receptor RNA activator 1	chr5	140537340	140557677	-1	q31.3	protein_coding
0.0096835	0.181	1425.01	597.34	2.39	201765_s_at	HEXA	ENSG00000213614	hexosaminidase subunit alpha	chr15	72340924	72376420	-1	q23	protein_coding
0.0070033	0.171	1979.61	4016.66	0.49	220890_s_at	DDX47	ENSG00000213782	DEAD-box helicase 47	chr12	12813316	12829981	1	p13.1	protein_coding
0.0014831	0.161	435.71	101.46	4.29	209264_s_at	TSPAN4	ENSG00000214063	tetraspanin 4	chr11	842812	867116	1	p15.5	protein_coding
0.0017603	0.161	750.93	248.41	3.02	209263_x_at	TSPAN4	ENSG00000214063	tetraspanin 4	chr11	842812	867116	1	p15.5	protein_coding
0.0045222	0.161	9063.49	1455.11	6.23	201422_at	IFI30	ENSG00000216490	IFI30 lysosomal thiol reductase	chr19	18173162	18178117	1	p13.11	protein_coding
0.0045933	0.161	225.68	474.09	0.48	236492_at	PPP2R2A	ENSG00000221914	protein phosphatase 2 regulatory subunit Balpha	chr8	26291508	26372680	1	p21.2	protein_coding
0.0099219	0.181	260.51	441.29	0.59	216080_s_at	FADS3	ENSG00000221968	fatty acid desaturase 3	chr11	61873519	61892051	-1	q12.2	protein_coding
0.0051859	0.163	438.28	769.52	0.57	204257_at	FADS3	ENSG00000221968	fatty acid desaturase 3	chr11	61873519	61892051	-1	q12.2	protein_coding
0.0035798	0.161	2218.93	3802.76	0.58	222999_s_at	CCNL2	ENSG00000221978	cyclin L2	chr1	1385711	1399335	-1	p36.33	protein_coding
0.0060888	0.168	611.12	970.59	0.63	221427_s_at	CCNL2	ENSG00000221978	cyclin L2	chr1	1385711	1399335	-1	p36.33	protein_coding
0.0046299	0.161	173.67	90.44	1.92	228773_at	ZDHHC12-DT	ENSG00000223478	novel transcript]	chr9	128724435	128733199	1	q34.11	lncRNA
0.0028505	0.161	234.98	149.63	1.57	228346_at	ZNF844	ENSG00000223547	zinc finger protein 844	chr19	12064731	12081565	1	p13.2	protein_coding
0.0064326	0.169	36.83	23.89	1.54	241710_at	C1GALT1C1L	ENSG00000223658	C1GALT1 specific chaperone 1 like	chr2	43675151	43676429	-1	p21	protein_coding
0.0024045	0.161	3954.59	914.7	4.32	201137_s_at	HLA-DPB1	ENSG00000223865	major histocompatibility complex, class II, DP beta 1	chr6	33075990	33089696	1	p21.32	protein_coding
0.0009014	0.161	49.5	85.51	0.58	235730_at	NUTM2B-AS1	ENSG00000225484	NUTM2B antisense RNA 1	chr10	79661394	79826594	-1	q22.3	lncRNA
0.0055864	0.165	365.62	137.06	2.67	209728_at	HLA-DRB4	ENSG00000231021	major histocompatibility complex, class II, DR beta 4	chrCHR_HSCHR6_MHC_MCF_CTG1	32611143	32626106	-1		protein_coding
0.0007336	0.161	1717.11	379.89	4.52	211990_at	HLA-DPA1	ENSG00000231389	major histocompatibility complex, class II, DP alpha 1	chr6	33064569	33080775	-1	p21.32	protein_coding
0.0012111	0.161	1943.3	341.78	5.69	211991_s_at	HLA-DPA1	ENSG00000231389	major histocompatibility complex, class II, DP alpha 1	chr6	33064569	33080775	-1	p21.32	protein_coding
0.009048	0.18	63.6	97.93	0.65	210294_at	TAPBP	ENSG00000231925	TAP binding protein	chr6	33299694	33314254	-1	p21.32	protein_coding
0.0034841	0.161	39.85	125.83	0.32	220703_at	IDI2-AS1	ENSG00000232656	IDI2 antisense RNA 1	chr10	1022630	1045425	1	p15.3	lncRNA
0.0059496	0.166	133.47	50.84	2.63	211101_x_at	LILRA2	ENSG00000239998	leukocyte immunoglobulin like receptor A2	chr19	54572920	54590287	1	q13.42	protein_coding
0.0053985	0.164	104.83	204.6	0.51	242239_at	NSUN6	ENSG00000241058	NOP2/Sun RNA methyltransferase 6	chr10	18545561	18659285	-1	p12.31	protein_coding
0.0039216	0.161	331.53	652.21	0.51	230200_at	NSUN6	ENSG00000241058	NOP2/Sun RNA methyltransferase 6	chr10	18545561	18659285	-1	p12.31	protein_coding
0.0028817	0.161	35.72	70.88	0.5	222128_at	NSUN6	ENSG00000241058	NOP2/Sun RNA methyltransferase 6	chr10	18545561	18659285	-1	p12.31	protein_coding
0.0082475	0.178	176.14	104.33	1.69	211672_s_at	ARPC4	ENSG00000241553	actin related protein 2/3 complex subunit 4	chr3	9792495	9807101	1	p25.3	protein_coding
0.000171	0.12	27.1	87.69	0.31	215011_at	SNHG3	ENSG00000242125	small nucleolar RNA host gene 3	chr1	28505980	28510892	1	p35.3	lncRNA
0.004297	0.161	935.33	244.03	3.83	203932_at	HLA-DMB	ENSG00000242574	major histocompatibility complex, class II, DM beta	chr6	32934629	32941028	-1	p21.32	protein_coding
0.002203	0.161	32.34	74.59	0.43	206268_at	LEFTY1	ENSG00000243709	left-right determination factor 1	chr1	225886282	225911382	-1	q42.12	protein_coding
0.0086437	0.178	10295.8	4443.68	2.32	211456_x_at	MT1HL1	ENSG00000244020	metallothionein 1H like 1	chr1	237004103	237004441	-1	q43	protein_coding
0.0014515	0.161	128.7	69.55	1.85	1556180_at	LINC00847	ENSG00000245060	long intergenic non-protein coding RNA 847	chr5	180830326	180839742	1	q35.3	lncRNA
0.0037163	0.161	165.24	109.11	1.51	238039_at	SCAMP1-AS1	ENSG00000245556	SCAMP1 antisense RNA 1	chr5	78342338	78360507	-1	q14.1	lncRNA
0.0050396	0.162	115.02	63.21	1.82	230710_at	MIR210HG	ENSG00000247095	MIR210 host gene	chr11	565657	568457	-1	p15.5	lncRNA
0.005115	0.162	120	69.43	1.73	235010_at	ZBED5-AS1	ENSG00000247271	ZBED5 antisense RNA 1	chr11	10858179	10908972	1	p15.4	lncRNA
0.0045989	0.161	257.82	576.89	0.45	222380_s_at	PDCD6	ENSG00000249915	programmed cell death 6	chr5	271621	314974	1	p15.33	protein_coding
0.0036786	0.161	153.51	297.31	0.52	222152_at	PDCD6	ENSG00000249915	programmed cell death 6	chr5	271621	314974	1	p15.33	protein_coding
0.0099499	0.181	196.36	289.54	0.68	228099_at	ZNF550	ENSG00000251369	zinc finger protein 550	chr19	57535257	57559863	-1	q13.43	protein_coding
0.0028908	0.161	152.31	252.9	0.6	223578_x_at	MALAT1	ENSG00000251562	metastasis associated lung adenocarcinoma transcript 1	chr11	65497688	65506516	1	q13.1	lncRNA
0.0082328	0.178	143.6	286.4	0.5	227510_x_at	MALAT1	ENSG00000251562	metastasis associated lung adenocarcinoma transcript 1	chr11	65497688	65506516	1	q13.1	lncRNA
0.0054594	0.165	304.52	145.63	2.09	227092_at	-	ENSG00000253982	CLN8 antisense RNA 1	chr8	1761054	1764508	-1	p23.3	lncRNA
0.0080476	0.176	116.2	216.61	0.54	226346_at	MEX3A	ENSG00000254726	mex-3 RNA binding family member A	chr1	156072013	156082465	-1	q22	protein_coding
0.0021889	0.161	170.53	279.05	0.61	227512_at	MEX3A	ENSG00000254726	mex-3 RNA binding family member A	chr1	156072013	156082465	-1	q22	protein_coding
0.0013234	0.161	261.25	43.88	5.95	205220_at	HCAR3	ENSG00000255398	hydroxycarboxylic acid receptor 3	chr12	122714756	122716811	-1	q24.31	protein_coding
0.0012941	0.161	199.95	406.31	0.49	219906_at	EBLN2	ENSG00000255423	endogenous Bornavirus like nucleoprotein 2	chr3	73061659	73063337	1	p13	protein_coding
0.0040794	0.161	53.83	130.31	0.41	227502_at	DENND11	ENSG00000257093	DENN domain containing 11	chr7	141656728	141702166	-1	q34	protein_coding
0.0073408	0.172	21.81	36.7	0.59	241774_at	PSMA3-AS1	ENSG00000257621	PSMA3 antisense RNA 1	chr14	58265365	58298134	-1	q23.1	lncRNA
0.0057079	0.165	97.57	42.75	2.28	221044_s_at	TRIM34	ENSG00000258659	tripartite motif containing 34	chr11	5619764	5644398	1	p15.4	protein_coding
0.0002067	0.12	193.99	38.57	5.03	204438_at	MRC1	ENSG00000260314	mannose receptor C-type 1	chr10	17809348	17911164	1	p12.33	protein_coding
0.008039	0.176	77.95	129.74	0.6	206560_s_at	MIA	ENSG00000261857	MIA SH3 domain containing	chr19	40771648	40777490	1	q13.2	protein_coding
0.0007838	0.161	200.56	95.16	2.11	226235_at	LINC00667	ENSG00000263753	long intergenic non-protein coding RNA 667	chr18	5237826	5290608	1	p11.31	lncRNA
0.0055038	0.165	83.96	44.69	1.88	243426_at	LINC00667	ENSG00000263753	long intergenic non-protein coding RNA 667	chr18	5237826	5290608	1	p11.31	lncRNA
9.04e-05	0.12	66.92	229.91	0.29	238994_at	OTUD7B	ENSG00000264522	OTU deubiquitinase 7B	chr1	149937812	150010726	-1	q21.2	protein_coding
0.0027844	0.161	28.62	48.33	0.59	1555139_a_at	OTUD7B	ENSG00000264522	OTU deubiquitinase 7B	chr1	149937812	150010726	-1	q21.2	protein_coding
0.001997	0.161	124.7	199.03	0.63	238573_at	OTUD7B	ENSG00000264522	OTU deubiquitinase 7B	chr1	149937812	150010726	-1	q21.2	protein_coding
0.0023531	0.161	131.1	275.32	0.48	1554602_at	RBM8A	ENSG00000265241	RNA binding motif protein 8A	chr1	145921556	145927678	-1	q21.1	protein_coding
0.0033863	0.161	727.48	190.92	3.81	1555759_a_at	CCL5	ENSG00000271503	C-C motif chemokine ligand 5	chr17	35871491	35880793	-1	q12	protein_coding
0.004357	0.161	450.6	122.62	3.67	1405_i_at	CCL5	ENSG00000271503	C-C motif chemokine ligand 5	chr17	35871491	35880793	-1	q12	protein_coding
0.0027575	0.161	132.3	61.44	2.15	217513_at	MILR1	ENSG00000271605	mast cell immunoglobulin like receptor 1	chr17	64449037	64468643	1	q23.3	protein_coding
0.0056884	0.165	562.98	183.63	3.07	238893_at	-	ENSG00000271614	ATP2B1 antisense RNA 1	chr12	89708959	89712590	1	q21.33	lncRNA
0.0071726	0.171	42.66	61.6	0.69	1559702_at	-	ENSG00000274925	ZKSCAN2 divergent transcript	chr16	25257952	25261066	1	p12.1	lncRNA
0.0024121	0.161	514.75	73.86	6.97	209924_at	CCL18	ENSG00000275385	C-C motif chemokine ligand 18	chr17	36064272	36072032	1	q12	protein_coding
0.0048242	0.161	563.13	89.31	6.31	32128_at	CCL18	ENSG00000275385	C-C motif chemokine ligand 18	chr17	36064272	36072032	1	q12	protein_coding
0.0003864	0.137	314.91	107.66	2.93	225897_at	MARCKS	ENSG00000277443	myristoylated alanine rich protein kinase C substrate	chr6	113857345	113863475	1	q21	protein_coding
0.0084092	0.178	139.86	71.86	1.95	201668_x_at	MARCKS	ENSG00000277443	myristoylated alanine rich protein kinase C substrate	chr6	113857345	113863475	1	q21	protein_coding
0.00709	0.171	654.52	289.68	2.26	201670_s_at	MARCKS	ENSG00000277443	myristoylated alanine rich protein kinase C substrate	chr6	113857345	113863475	1	q21	protein_coding
0.0015682	0.161	145.23	80.45	1.81	209670_at	-	ENSG00000277734	T cell receptor alpha constant	chr14	22547506	22552156	1	q11.2	TR_C_gene
0.0097316	0.181	69.81	14.94	4.67	223660_at	ADORA3	ENSG00000282608	adenosine A3 receptor	chr1	111499429	111503633	-1	p13.2	protein_coding
0.0056194	0.165	98.43	56.77	1.73	230294_at	RALY-AS1	ENSG00000285230	RALY antisense RNA 1	chr20	33980679	33994357	-1	q11.22	lncRNA
0.0019861	0.161	721.44	1106.21	0.65	212068_s_at	PRRC2B	ENSG00000288701	proline rich coiled-coil 2B	chr9	131373636	131500197	1	q34.13	protein_coding
0.0040872	0.161	341.34	186.04	1.83	217362_x_at	HLA-DRB6	ENSG00000290878	Major histocompatibility complex, class II, DR beta 6	chr6	32552713	32560022	-1		lncRNA
0.0040875	0.161	87.13	161.75	0.54	214340_at	ALOX12P2	ENSG00000291084	Arachidonate 12-lipoxygenase pseudogene 2	chr17	6853861	6954107	1		lncRNA
0.003802	0.161	83.03	45.39	1.83	236798_at	LINC00888	ENSG00000291106	Long intergenic non-protein coding RNA 888	chr3	183447582	183456017	1		lncRNA
0.0031082	0.161	23.38	15.27	1.53	238790_at	-	ENSG00000291107	Novel transcript	chr12	9648047	9658412	1		lncRNA
0.0080634	0.176	202.71	113.19	1.79	240572_s_at	-	ENSG00000291107	Novel transcript	chr12	9648047	9658412	1		lncRNA
0.0056174	0.165	19.33	44.26	0.44	244289_at	ZNF300P1	ENSG00000291115	zinc finger protein 300 pseudogene 1	chr5	150930456	150946598	-1		lncRNA
0.000911	0.161	217.03	20.25	10.72	214511_x_at	FCGR1BP	ENSG00000291135	Fc gamma receptor Ib, pseudogene	chr1	121087298	121097161	1		lncRNA
0.0077729	0.175	88.25	16.71	5.28	228055_at	-	ENSG00000291230	Novel transcript	chr19	50333796	50344806	-1		lncRNA
0.0033501	0.161	168.51	342.28	0.49	238449_at	SMG1P5	ENSG00000291266	SMG1 pseudogene 5	chr16	30285018	30335395	-1		lncRNA

## Sheet: GSE73064 Met vs 1ary
Parametric p-value	FDR	Metastatic	Primary	Fold-change	ProbeSet	Gene_name	Gene_ID	Gene_description	Chromosome_scaffold_name	Gene_start_bp	Gene_end_bp	Strand	Karyotype_band	Gene_GC_content	Gene_type	Gene_Length
0.0060481	0.952	26.47	36.48	0.73	232193_at	GSTT1	ENSG00000277656	glutathione S-transferase theta 1	CHR_HSCHR22_1_CTG7	24033952	24042493	-1			protein_coding
0.006774	0.952	58.61	40.16	1.46	210374_x_at	PTGER3	ENSG00000050628	prostaglandin E receptor 3 [Source:HGNC Symbol;Acc:HGNC:9595]	chr1	70852353	71047808	-1	p31.1	38.05	protein_coding	9653
0.0073491	0.952	42.65	29.74	1.43	210831_s_at	PTGER3	ENSG00000050628	prostaglandin E receptor 3 [Source:HGNC Symbol;Acc:HGNC:9595]	chr1	70852353	71047808	-1	p31.1	38.05	protein_coding	9653
0.0009722	0.952	142.36	89.23	1.6	213060_s_at	CHI3L2	ENSG00000064886	chitinase 3 like 2 [Source:HGNC Symbol;Acc:HGNC:1933]	chr1	111200771	111243440	1	p13.2	44.64	protein_coding	3295
0.0013325	0.952	575.53	324.85	1.77	204748_at	PTGS2	ENSG00000073756	prostaglandin-endoperoxide synthase 2 [Source:HGNC Symbol;Acc:HGNC:9605]	chr1	186671791	186680922	-1	q31.1	36.06	protein_coding	5484
0.0061588	0.952	169.63	119.95	1.41	221047_s_at	MARK1	ENSG00000116141	microtubule affinity regulating kinase 1 [Source:HGNC Symbol;Acc:HGNC:6896]	chr1	220528136	220664461	1	q41	37.11	protein_coding	15255
0.0086046	0.952	140.74	95.03	1.48	209791_at	PADI2	ENSG00000117115	peptidyl arginine deiminase 2 [Source:HGNC Symbol;Acc:HGNC:18341]	chr1	17066761	17119451	-1	p36.13	51.75	protein_coding	6000
0.0075786	0.952	398.08	728.81	0.55	207826_s_at	ID3	ENSG00000117318	inhibitor of DNA binding 3, HLH protein [Source:HGNC Symbol;Acc:HGNC:5362]	chr1	23557926	23559501	-1	p36.12	57.04	protein_coding	1496
0.0033755	0.952	64.19	37.46	1.71	1554878_a_at	ABCD3	ENSG00000117528	ATP binding cassette subfamily D member 3 [Source:HGNC Symbol;Acc:HGNC:67]	chr1	94418389	94518666	1	p21.3	37.07	protein_coding	7655
0.0074937	0.952	41.87	83.27	0.5	1555725_a_at	RGS5	ENSG00000143248	regulator of G protein signaling 5 [Source:HGNC Symbol;Acc:HGNC:10001]	chr1	163111121	163321791	-1	q23.3	37.67	protein_coding	6624
0.0042162	0.952	22.63	36.05	0.63	240735_at	CDC42BPA	ENSG00000143776	CDC42 binding protein kinase alpha [Source:HGNC Symbol;Acc:HGNC:1737]	chr1	226989865	227318502	-1	q42.13	36.66	protein_coding	14243
0.0044882	0.952	75.94	52.7	1.44	216044_x_at	DIPK1A	ENSG00000154511	divergent protein kinase domain 1A [Source:HGNC Symbol;Acc:HGNC:32213]	chr1	92832737	92961522	-1	p22.1	39.43	protein_coding	3091
0.0086619	0.952	91.24	64.32	1.42	213689_x_at	DIPK1A	ENSG00000154511	divergent protein kinase domain 1A [Source:HGNC Symbol;Acc:HGNC:32213]	chr1	92832737	92961522	-1	p22.1	39.43	protein_coding	3091
0.0040496	0.952	344.84	232.79	1.48	228955_at	LRP8	ENSG00000157193	LDL receptor related protein 8 [Source:HGNC Symbol;Acc:HGNC:6700]	chr1	53242364	53328469	-1	p32.3	51.87	protein_coding	19668
0.0048074	0.952	286.7	207.72	1.38	223518_at	DFFA	ENSG00000160049	DNA fragmentation factor subunit alpha [Source:HGNC Symbol;Acc:HGNC:2772]	chr1	10456522	10472529	-1	p36.22	48.53	protein_coding	6625
0.0051527	0.952	3443.57	2138.26	1.61	1553589_a_at	PDZK1IP1	ENSG00000162366	PDZK1 interacting protein 1 [Source:HGNC Symbol;Acc:HGNC:16887]	chr1	47183582	47191044	-1	p33	57.9	protein_coding	1430
0.0056126	0.952	5266.81	7852.7	0.67	202672_s_at	ATF3	ENSG00000162772	activating transcription factor 3 [Source:HGNC Symbol;Acc:HGNC:785]	chr1	212565334	212620777	1	q32.3	43.16	protein_coding	4040
0.0015695	0.952	90.67	252.55	0.36	222871_at	KLHDC8A	ENSG00000162873	kelch domain containing 8A [Source:HGNC Symbol;Acc:HGNC:25573]	chr1	205336061	205357090	-1	q32.1	50.87	protein_coding	3666
0.0099148	0.952	242.34	174.9	1.39	212390_at	PDE4DIP	ENSG00000178104	phosphodiesterase 4D interacting protein [Source:HGNC Symbol;Acc:HGNC:15580]	chr1	148808181	149048286	1	q21.2	41	protein_coding	27623
0.009631	0.952	112.4	175.76	0.64	227702_at	CYP4X1	ENSG00000186377	cytochrome P450 family 4 subfamily X member 1 [Source:HGNC Symbol;Acc:HGNC:20244]	chr1	47023669	47050751	1	p33	39.11	protein_coding	2447
0.0065698	0.952	40.32	87.9	0.46	204223_at	PRELP	ENSG00000188783	proline and arginine rich end leucine rich repeat protein [Source:HGNC Symbol;Acc:HGNC:9357]	chr1	203475806	203491352	1	q32.1	50	protein_coding	5769
0.0020378	0.952	104.47	59.88	1.74	206460_at	AJAP1	ENSG00000196581	adherens junctions associated protein 1 [Source:HGNC Symbol;Acc:HGNC:30801]	chr1	4654609	4792534	1	p36.32	52.4	protein_coding	12528
0.0089874	0.952	28.46	16.87	1.69	215790_at	AJAP1	ENSG00000196581	adherens junctions associated protein 1 [Source:HGNC Symbol;Acc:HGNC:30801]	chr1	4654609	4792534	1	p36.32	52.4	protein_coding	12528
0.0010502	0.952	67.62	43.83	1.54	203961_at	NEBL	ENSG00000078114	nebulette [Source:HGNC Symbol;Acc:HGNC:16932]	chr10	20779973	21293011	-1	p12.31	39.95	protein_coding	17810
0.0067904	0.952	80.11	41.99	1.91	213830_at	YME1L1	ENSG00000136758	YME1 like 1 ATPase [Source:HGNC Symbol;Acc:HGNC:12843]	chr10	27110111	27155266	-1	p12.1	38.36	protein_coding	7336
0.0043323	0.952	2276.63	1510.15	1.51	212614_at	ARID5B	ENSG00000150347	AT-rich interaction domain 5B [Source:HGNC Symbol;Acc:HGNC:17362]	chr10	61901684	62096944	1	q21.2	40.32	protein_coding	8760
0.0074088	0.952	251.47	185.47	1.36	209442_x_at	ANK3	ENSG00000151150	ankyrin 3 [Source:HGNC Symbol;Acc:HGNC:494]	chr10	60026298	60733490	-1	q21.2	37.75	protein_coding	25759
0.0045975	0.952	496.96	740.96	0.67	209183_s_at	DEPP1	ENSG00000165507	DEPP1 autophagy regulator [Source:HGNC Symbol;Acc:HGNC:23355]	chr10	44970981	44978809	-1	q11.21	57.21	protein_coding	2979
0.0030879	0.952	287.02	622.24	0.46	214247_s_at	DKK3	ENSG00000050165	dickkopf WNT signaling pathway inhibitor 3 [Source:HGNC Symbol;Acc:HGNC:2893]	chr11	11956207	12009769	-1	p15.3	48.21	protein_coding	11958
0.0048151	0.952	21.13	15.05	1.4	220560_at	C11orf21	ENSG00000110665	chromosome 11 open reading frame 21 [Source:HGNC Symbol;Acc:HGNC:13231]	chr11	2295628	2303049	-1	p15.5	60.54	protein_coding	4074
0.0096317	0.952	324.33	224.26	1.45	209824_s_at	ARNTL	ENSG00000133794	aryl hydrocarbon receptor nuclear translocator like [Source:HGNC Symbol;Acc:HGNC:701]	chr11	13276652	13387266	1	p15.3	45.43	protein_coding	6934
0.0093091	0.952	2385.38	4368.22	0.55	205547_s_at	TAGLN	ENSG00000149591	transgelin [Source:HGNC Symbol;Acc:HGNC:11553]	chr11	117199370	117207464	1	q23.3	56.95	protein_coding	6550
0.0096118	0.952	307.73	215.94	1.43	213497_at	ABTB2	ENSG00000166016	ankyrin repeat and BTB domain containing 2 [Source:HGNC Symbol;Acc:HGNC:23842]	chr11	34150987	34358010	-1	p13	47.92	protein_coding	4976
0.0032249	0.952	33.28	50.29	0.66	235916_at	YPEL4	ENSG00000166793	yippee like 4 [Source:HGNC Symbol;Acc:HGNC:18328]	chr11	57645087	57649944	-1	q12.1	55.21	protein_coding	4460
0.0081909	0.952	277.56	202.5	1.37	227687_at	HYLS1	ENSG00000198331	HYLS1 centriolar and ciliogenesis associated [Source:HGNC Symbol;Acc:HGNC:26558]	chr11	125883614	125900646	1	q24.2	41.34	protein_coding	2389
0.0093602	0.952	288.84	680.4	0.42	211813_x_at	DCN	ENSG00000011465	decorin [Source:HGNC Symbol;Acc:HGNC:2705]	chr12	91140484	91183217	-1	q21.33	34.9	protein_coding	12941
0.0072909	0.952	238.74	176.8	1.35	211577_s_at	IGF1	ENSG00000017427	insulin like growth factor 1 [Source:HGNC Symbol;Acc:HGNC:5464]	chr12	102395874	102481744	-1	q23.2	39.7	protein_coding	8115
0.0084711	0.952	89.56	51.82	1.73	209541_at	IGF1	ENSG00000017427	insulin like growth factor 1 [Source:HGNC Symbol;Acc:HGNC:5464]	chr12	102395874	102481744	-1	q23.2	39.7	protein_coding	8115
0.009167	0.952	31.61	16.4	1.93	205700_at	HSD17B6	ENSG00000025423	hydroxysteroid 17-beta dehydrogenase 6 [Source:HGNC Symbol;Acc:HGNC:23316]	chr12	56752161	56787790	1	q13.3	44.92	protein_coding	2272
0.0012765	0.952	19.24	11.23	1.71	240078_at	SFSWAP	ENSG00000061936	splicing factor SWAP [Source:HGNC Symbol;Acc:HGNC:10790]	chr12	131711081	131799738	1	q24.33	46.45	protein_coding	10158
0.0077002	0.952	51.91	82.98	0.63	219764_at	FZD10	ENSG00000111432	frizzled class receptor 10 [Source:HGNC Symbol;Acc:HGNC:4039]	chr12	130162459	130165740	1	q24.33	58.38	protein_coding	3282
0.0058999	0.952	17.19	37.71	0.46	242680_at	AVPR1A	ENSG00000166148	arginine vasopressin receptor 1A [Source:HGNC Symbol;Acc:HGNC:895]	chr12	63142759	63151201	-1	q14.2	38.49	protein_coding	6222
0.0018122	0.952	42.29	27.5	1.54	1555229_a_at	C1S	ENSG00000182326	complement C1s [Source:HGNC Symbol;Acc:HGNC:1247]	chr12	6988259	7071032	1	p13.31	45.02	protein_coding	6462
0.0076636	0.952	255.25	180.51	1.41	209758_s_at	MFAP5	ENSG00000197614	microfibril associated protein 5 [Source:HGNC Symbol;Acc:HGNC:29673]	chr12	8637346	8662888	-1	p13.31	42.51	protein_coding	3889
0.0026582	0.952	60.34	102.12	0.59	206858_s_at	HOXC6	ENSG00000197757	homeobox C6 [Source:HGNC Symbol;Acc:HGNC:5128]	chr12	53990624	54030823	1	q13.13	53.61	protein_coding	3458
0.0007201	0.952	36.22	110.01	0.33	226498_at	FLT1	ENSG00000102755	fms related receptor tyrosine kinase 1 [Source:HGNC Symbol;Acc:HGNC:3763]	chr13	28300346	28495145	-1	q12.3	41.61	protein_coding	12565
0.0028734	0.952	59.88	110.56	0.54	222033_s_at	FLT1	ENSG00000102755	fms related receptor tyrosine kinase 1 [Source:HGNC Symbol;Acc:HGNC:3763]	chr13	28300346	28495145	-1	q12.3	41.61	protein_coding	12565
0.0089389	0.952	28.32	20.07	1.41	1555039_a_at	ABCC4	ENSG00000125257	ATP binding cassette subfamily C member 4 [Source:HGNC Symbol;Acc:HGNC:55]	chr13	95019835	95301475	-1	q32.1	42.34	protein_coding	8629
0.0089875	0.952	26.92	39.3	0.69	235338_s_at	SETDB2	ENSG00000136169	SET domain bifurcated histone lysine methyltransferase 2 [Source:HGNC Symbol;Acc:HGNC:20263]	chr13	49444374	49495003	1	q14.2	37.41	protein_coding	6678
0.0023325	0.952	220.52	144.16	1.53	229097_at	DIAPH3	ENSG00000139734	diaphanous related formin 3 [Source:HGNC Symbol;Acc:HGNC:15480]	chr13	59665583	60163928	-1	q21.2	35.91	protein_coding	7383
0.001142	0.952	82.91	55.33	1.5	214825_at	FAM155A	ENSG00000204442	family with sequence similarity 155 member A [Source:HGNC Symbol;Acc:HGNC:33877]	chr13	107163510	107867496	-1	q33.3	37.44	protein_coding	9264
0.0064551	0.952	262.52	170.97	1.54	209714_s_at	CDKN3	ENSG00000100526	cyclin dependent kinase inhibitor 3 [Source:HGNC Symbol;Acc:HGNC:1791]	chr14	54396849	54420218	1	q22.2	40.35	protein_coding	1836
0.0098812	0.952	23.64	15.99	1.48	220673_s_at	PPP4R4	ENSG00000119698	protein phosphatase 4 regulatory subunit 4 [Source:HGNC Symbol;Acc:HGNC:23788]	chr14	94146128	94279734	1	q32.12	37.14	protein_coding	4973
0.0060384	0.952	479.54	317.19	1.51	225464_at	FRMD6	ENSG00000139926	FERM domain containing 6 [Source:HGNC Symbol;Acc:HGNC:19839]	chr14	51489100	51730727	1	q22.1	39.42	protein_coding	9416
0.0078219	0.952	22.3	30.25	0.74	210270_at	RGS6	ENSG00000182732	regulator of G protein signaling 6 [Source:HGNC Symbol;Acc:HGNC:10002]	chr14	71932429	72566530	1	q24.2	41.91	protein_coding	8948
0.0041874	0.952	34.98	22.92	1.53	232475_at	TICRR	ENSG00000140534	TOPBP1 interacting checkpoint and replication regulator [Source:HGNC Symbol;Acc:HGNC:28704]	chr15	89575469	89631056	1	q26.1	42.68	protein_coding	8415
0.0099785	0.952	7.48	11.45	0.65	203178_at	GATM	ENSG00000171766	glycine amidinotransferase [Source:HGNC Symbol;Acc:HGNC:4175]	chr15	45361124	45402327	-1	q21.1	40.25	protein_coding	9260
0.0019258	0.952	40.12	62.13	0.65	214297_at	CSPG4	ENSG00000173546	chondroitin sulfate proteoglycan 4 [Source:HGNC Symbol;Acc:HGNC:2466]	chr15	75674322	75712848	-1	q24.2	59.29	protein_coding	8290
0.0030719	0.952	18.52	12.92	1.43	205551_at	SV2B	ENSG00000185518	synaptic vesicle glycoprotein 2B [Source:HGNC Symbol;Acc:HGNC:16874]	chr15	91099950	91302565	1	q26.1	42.49	protein_coding	13710
0.0063694	0.952	9685.36	6113.27	1.58	204745_x_at	MT1G	ENSG00000125144	metallothionein 1G [Source:HGNC Symbol;Acc:HGNC:7399]	chr16	56666730	56668065	-1	q13	54.12	protein_coding	751
0.0031949	0.952	34.19	22.7	1.51	234811_at	CENPN	ENSG00000166451	centromere protein N [Source:HGNC Symbol;Acc:HGNC:30873]	chr16	81006552	81033114	1	q23.2	43.2	protein_coding	5677
0.0018462	0.952	3626.61	2216.92	1.64	213629_x_at	MT1F	ENSG00000198417	metallothionein 1F [Source:HGNC Symbol;Acc:HGNC:7398]	chr16	56657731	56660698	1	q13	51.79	protein_coding	1852
0.0060765	0.952	2378.7	1451.48	1.64	210524_x_at	MT1F	ENSG00000198417	metallothionein 1F [Source:HGNC Symbol;Acc:HGNC:7398]	chr16	56657731	56660698	1	q13	51.79	protein_coding	1852
0.0060493	0.952	66.64	93.71	0.71	1557121_s_at	HEATR6	ENSG00000068097	HEAT repeat containing 6 [Source:HGNC Symbol;Acc:HGNC:24076]	chr17	60041008	60078922	-1	q23.1	40.88	protein_coding	7045
0.006304	0.952	92.28	132.12	0.7	219173_at	MYO15B	ENSG00000266714	myosin XVB [Source:HGNC Symbol;Acc:HGNC:14083]	chr17	75588058	75626849	1	q25.1	58.72	protein_coding	13109
0.0064312	0.952	22.95	15.2	1.51	229523_at	TMEM200C	ENSG00000206432	transmembrane protein 200C [Source:HGNC Symbol;Acc:HGNC:37208]	chr18	5882072	5895955	-1	p11.31	44.76	protein_coding	10638
0.0021462	0.952	74.5	110.43	0.67	230807_at	ODAD3	ENSG00000198003	outer dynein arm docking complex subunit 3 [Source:HGNC Symbol;Acc:HGNC:28303]	chr19	11420604	11435782	-1	p13.2	52.68	protein_coding	2681
0.0009407	0.952	24.95	70.01	0.36	229400_at	HOXD10	ENSG00000128710	homeobox D10 [Source:HGNC Symbol;Acc:HGNC:5133]	chr2	176108790	176119937	1	q31.1	49.31	protein_coding	2488
0.001318	0.952	15.26	26.36	0.58	207373_at	HOXD10	ENSG00000128710	homeobox D10 [Source:HGNC Symbol;Acc:HGNC:5133]	chr2	176108790	176119937	1	q31.1	49.31	protein_coding	2488
0.0073377	0.952	83.44	121.22	0.69	224321_at	TMEFF2	ENSG00000144339	transmembrane protein with EGF like and two follistatin like domains 2 [Source:HGNC Symbol;Acc:HGNC:11867]	chr2	191949043	192194933	-1	q32.3	35.9	protein_coding	5856
0.0030554	0.952	195.22	130.44	1.5	1555963_x_at	B3GNT7	ENSG00000156966	UDP-GlcNAc:betaGal beta-1,3-N-acetylglucosaminyltransferase 7 [Source:HGNC Symbol;Acc:HGNC:18811]	chr2	231395710	231401164	1	q37.1	62.73	protein_coding	3639
0.0047957	0.952	188.62	129.71	1.45	1555962_at	B3GNT7	ENSG00000156966	UDP-GlcNAc:betaGal beta-1,3-N-acetylglucosaminyltransferase 7 [Source:HGNC Symbol;Acc:HGNC:18811]	chr2	231395710	231401164	1	q37.1	62.73	protein_coding	3639
0.0049461	0.952	800.64	459.71	1.74	241994_at	XDH	ENSG00000158125	xanthine dehydrogenase [Source:HGNC Symbol;Acc:HGNC:12805]	chr2	31334321	31414742	-1	p23.1	42.92	protein_coding	6064
0.003385	0.952	39.07	24.17	1.62	238727_at	CT75	ENSG00000291155	cancer/testis associated transcript 75	chr2	222318471	222352989	1			lncRNA
0.0049022	0.952	76.31	54.32	1.4	222853_at	FLRT3	ENSG00000125848	fibronectin leucine rich transmembrane protein 3 [Source:HGNC Symbol;Acc:HGNC:3762]	chr20	14322985	14337614	-1	p12.1	35.11	protein_coding	5191
0.0036763	0.952	269.89	184.52	1.46	202897_at	SIRPA	ENSG00000198053	signal regulatory protein alpha [Source:HGNC Symbol;Acc:HGNC:9662]	chr20	1894167	1940592	1	p13	51.36	protein_coding	4957
0.0071845	0.952	62.78	43.82	1.43	226882_x_at	WDR4	ENSG00000160193	WD repeat domain 4 [Source:HGNC Symbol;Acc:HGNC:12756]	chr21	42843094	42879568	-1	q22.3	53.71	protein_coding	2738
0.0014663	0.952	117.8	74.25	1.59	204126_s_at	CDC45	ENSG00000093009	cell division cycle 45 [Source:HGNC Symbol;Acc:HGNC:1739]	chr22	19479457	19520612	1	q11.21	48.03	protein_coding	2978
0.0095677	0.952	38.76	27.44	1.41	227014_at	ASPHD2	ENSG00000128203	aspartate beta-hydroxylase domain containing 2 [Source:HGNC Symbol;Acc:HGNC:30437]	chr22	26429260	26445015	1	q12.1	49.47	protein_coding	3370
0.0023996	0.952	222.21	363.78	0.61	204294_at	AMT	ENSG00000145020	aminomethyltransferase [Source:HGNC Symbol;Acc:HGNC:473]	chr3	49416778	49422685	-1	p21.31	54.4	protein_coding	5675
0.0069126	0.952	28.63	48.27	0.59	240052_at	ITPR1	ENSG00000150995	inositol 1,4,5-trisphosphate receptor type 1 [Source:HGNC Symbol;Acc:HGNC:6180]	chr3	4493345	4847506	1	p26.1	42.9	protein_coding	32120
0.0057196	0.952	14.74	20.47	0.72	232639_at	EFCAB12	ENSG00000172771	EF-hand calcium binding domain 12 [Source:HGNC Symbol;Acc:HGNC:28061]	chr3	129401321	129428651	-1	q21.3	49.22	protein_coding	7789
0.0035841	0.952	558	385.19	1.45	219836_at	ZBED2	ENSG00000177494	zinc finger BED-type containing 2 [Source:HGNC Symbol;Acc:HGNC:20710]	chr3	111592900	111595346	-1	q13.13	47.49	protein_coding	2214
0.004674	0.952	160.13	236.92	0.68	222357_at	ZBTB20	ENSG00000181722	zinc finger and BTB domain containing 20 [Source:HGNC Symbol;Acc:HGNC:13503]	chr3	114314500	115147288	-1	q13.31	36.07	protein_coding	32008
0.0009185	0.952	189.2	117.13	1.62	1569583_at	EREG	ENSG00000124882	epiregulin [Source:HGNC Symbol;Acc:HGNC:3443]	chr4	74365145	74388749	1	q13.3	36.63	protein_coding	5713
0.0006367	0.952	190.91	106.61	1.79	219869_s_at	SLC39A8	ENSG00000138821	solute carrier family 39 member 8 [Source:HGNC Symbol;Acc:HGNC:20862]	chr4	102251080	102431258	-1	q24	38.16	protein_coding	8482
0.0067039	0.952	121.77	76.76	1.59	219450_at	C4orf19	ENSG00000154274	chromosome 4 open reading frame 19 [Source:HGNC Symbol;Acc:HGNC:25618]	chr4	37453925	37623495	1	p14	41.01	protein_coding	4470
0.0074067	0.952	423.61	1228.97	0.34	201163_s_at	IGFBP7	ENSG00000163453	insulin like growth factor binding protein 7 [Source:HGNC Symbol;Acc:HGNC:5476]	chr4	57030773	57110385	-1	q12	42.44	protein_coding	1930
0.0034309	0.952	57.2	94.15	0.61	242794_at	MAML3	ENSG00000196782	mastermind like transcriptional coactivator 3 [Source:HGNC Symbol;Acc:HGNC:16272]	chr4	139716753	140154184	-1	q31.1	41.6	protein_coding	7012
0.0096734	0.952	440.32	294.84	1.49	204033_at	TRIP13	ENSG00000071539	thyroid hormone receptor interactor 13 [Source:HGNC Symbol;Acc:HGNC:12307]	chr5	892884	919357	1	p15.33	50.22	protein_coding	3319
0.0065433	0.952	82.19	208.12	0.39	225275_at	EDIL3	ENSG00000164176	EGF like repeats and discoidin domains 3 [Source:HGNC Symbol;Acc:HGNC:3173]	chr5	83940554	84384880	-1	q14.3	35.47	protein_coding	5825
0.0063354	0.952	132.42	91.88	1.44	227655_at	SNHG18	ENSG00000250786	small nucleolar RNA host gene 18 [Source:HGNC Symbol;Acc:HGNC:49007]	chr5	9546200	9550609	1	p15.31	46.64	lncRNA	1951
0.0078221	0.952	213.39	286.83	0.74	209454_s_at	TEAD3	ENSG00000007866	TEA domain transcription factor 3 [Source:HGNC Symbol;Acc:HGNC:11716]	chr6	35473597	35497079	-1	p21.31	56.75	protein_coding	3049
0.0090194	0.952	92.09	240.93	0.38	212950_at	ADGRF5	ENSG00000069122	adhesion G protein-coupled receptor F5 [Source:HGNC Symbol;Acc:HGNC:19030]	chr6	46852522	46954943	-1	p12.3	41.65	protein_coding	6601
0.008485	0.952	213.47	131.43	1.62	205844_at	VNN1	ENSG00000112299	vanin 1 [Source:HGNC Symbol;Acc:HGNC:12705]	chr6	132680849	132714055	-1	q23.2	38.11	protein_coding	3853
0.0086292	0.952	270.96	202.68	1.34	226810_at	OGFRL1	ENSG00000119900	opioid growth factor receptor like 1 [Source:HGNC Symbol;Acc:HGNC:21378]	chr6	71288811	71309059	1	q13	36.15	protein_coding	9176
0.0092453	0.952	72.5	104.49	0.69	212793_at	DAAM2	ENSG00000146122	dishevelled associated activator of morphogenesis 2 [Source:HGNC Symbol;Acc:HGNC:18143]	chr6	39792298	39904877	1	p21.2	47.6	protein_coding	12955
0.0045516	0.952	884.88	607.33	1.46	226936_at	CENPW	ENSG00000203760	centromere protein W [Source:HGNC Symbol;Acc:HGNC:21488]	chr6	126340115	126348875	1	q22.32	35.6	protein_coding	854
0.0098539	0.952	50.6	37.47	1.35	235707_at	SMIM13	ENSG00000224531	small integral membrane protein 13 [Source:HGNC Symbol;Acc:HGNC:27356]	chr6	11093834	11138733	1	p24.2	42.31	protein_coding	4887
0.0042364	0.952	835.25	1582.75	0.53	225207_at	PDK4	ENSG00000004799	pyruvate dehydrogenase kinase 4 [Source:HGNC Symbol;Acc:HGNC:8812]	chr7	95583499	95596516	-1	q21.3	36.08	protein_coding	4544
0.0088905	0.952	1171.1	1643.01	0.71	223190_s_at	KMT2E	ENSG00000005483	lysine methyltransferase 2E (inactive) [Source:HGNC Symbol;Acc:HGNC:18541]	chr7	105014190	105115019	1	q22.3	37.41	protein_coding	9949
0.0049732	0.952	841.42	525.27	1.6	203789_s_at	SEMA3C	ENSG00000075223	semaphorin 3C [Source:HGNC Symbol;Acc:HGNC:10725]	chr7	80742538	80922359	-1	q21.11	35.82	protein_coding	6100
0.0036963	0.952	388.06	221.43	1.75	224847_at	CDK6	ENSG00000105810	cyclin dependent kinase 6 [Source:HGNC Symbol;Acc:HGNC:1777]	chr7	92604921	92836573	-1	q21.2	38.19	protein_coding	12239
0.0039315	0.952	258.84	182.7	1.42	219439_at	C1GALT1	ENSG00000106392	core 1 synthase, glycoprotein-N-acetylgalactosamine 3-beta-galactosyltransferase 1 [Source:HGNC Symbol;Acc:HGNC:24337]	chr7	7156934	7248616	1	p22.1	37.34	protein_coding	7773
0.0053309	0.952	217	158.31	1.37	226107_at	C1GALT1	ENSG00000106392	core 1 synthase, glycoprotein-N-acetylgalactosamine 3-beta-galactosyltransferase 1 [Source:HGNC Symbol;Acc:HGNC:24337]	chr7	7156934	7248616	1	p22.1	37.34	protein_coding	7773
0.0055896	0.952	148.79	216.57	0.69	226808_at	ZNF862	ENSG00000106479	zinc finger protein 862 [Source:HGNC Symbol;Acc:HGNC:34519]	chr7	149838375	149867479	1	q36.1	48.91	protein_coding	8422
0.008895	0.952	331.91	236.18	1.41	200756_x_at	CALU	ENSG00000128595	calumenin [Source:HGNC Symbol;Acc:HGNC:1458]	chr7	128739292	128773400	1	q32.1	39.93	protein_coding	6342
0.0011252	0.952	105.19	36.57	2.88	206488_s_at	CD36	ENSG00000135218	CD36 molecule [Source:HGNC Symbol;Acc:HGNC:1663]	chr7	80369575	80679277	1	q21.11	36.03	protein_coding	10880
0.0014972	0.952	8301.77	5064.32	1.64	205207_at	IL6	ENSG00000136244	interleukin 6 [Source:HGNC Symbol;Acc:HGNC:6018]	chr7	22725884	22732002	1	p15.3	45.63	protein_coding	2069
0.00387	0.952	18.66	12.13	1.54	227346_at	IKZF1	ENSG00000185811	IKAROS family zinc finger 1 [Source:HGNC Symbol;Acc:HGNC:13176]	chr7	50304068	50405101	1	p12.2	43.45	protein_coding	10921
0.0005184	0.952	167.38	296.92	0.56	205463_s_at	PDGFA	ENSG00000197461	platelet derived growth factor subunit A [Source:HGNC Symbol;Acc:HGNC:8799]	chr7	497258	520296	-1	p22.3	60.14	protein_coding	4151
0.0029354	0.952	195.9	311.21	0.63	216867_s_at	PDGFA	ENSG00000197461	platelet derived growth factor subunit A [Source:HGNC Symbol;Acc:HGNC:8799]	chr7	497258	520296	-1	p22.3	60.14	protein_coding	4151
0.0086495	0.952	450.73	305.21	1.48	226756_at	CCDC71L	ENSG00000253276	coiled-coil domain containing 71 like [Source:HGNC Symbol;Acc:HGNC:26685]	chr7	106654360	106661158	-1	q22.3	40.48	protein_coding	6799
0.0026665	0.952	15.91	23.1	0.69	220156_at	EFCAB1	ENSG00000034239	EF-hand calcium binding domain 1 [Source:HGNC Symbol;Acc:HGNC:25678]	chr8	48710789	48735311	-1	q11.21	40.09	protein_coding	5822
0.0019926	0.952	27.43	58.82	0.47	236034_at	ANGPT2	ENSG00000091879	angiopoietin 2 [Source:HGNC Symbol;Acc:HGNC:485]	chr8	6499632	6563409	-1	p23.1	40.71	protein_coding	6794
0.002312	0.952	33.38	58.71	0.57	211148_s_at	ANGPT2	ENSG00000091879	angiopoietin 2 [Source:HGNC Symbol;Acc:HGNC:485]	chr8	6499632	6563409	-1	p23.1	40.71	protein_coding	6794
0.0033933	0.952	19.24	45.12	0.43	205572_at	ANGPT2	ENSG00000091879	angiopoietin 2 [Source:HGNC Symbol;Acc:HGNC:485]	chr8	6499632	6563409	-1	p23.1	40.71	protein_coding	6794
0.0052432	0.952	37.03	78.91	0.47	237261_at	ANGPT2	ENSG00000091879	angiopoietin 2 [Source:HGNC Symbol;Acc:HGNC:485]	chr8	6499632	6563409	-1	p23.1	40.71	protein_coding	6794
0.0023978	0.952	134.56	93.27	1.44	211767_at	GINS4	ENSG00000147536	GINS complex subunit 4 [Source:HGNC Symbol;Acc:HGNC:28226]	chr8	41529218	41545030	1	p11.21	46.73	protein_coding	5447
0.0070762	0.952	18.97	26.42	0.72	222780_s_at	BAALC	ENSG00000164929	BAALC binder of MAP3K1 and KLF4 [Source:HGNC Symbol;Acc:HGNC:14333]	chr8	103140713	103230305	1	q22.3	42.75	protein_coding	3994
0.0080974	0.952	14.38	10.49	1.37	229823_at	RIMS2	ENSG00000176406	regulating synaptic membrane exocytosis 2 [Source:HGNC Symbol;Acc:HGNC:17283]	chr8	103500696	104256094	1	q22.3	35.39	protein_coding	13962
0.0071856	0.952	92.17	66.08	1.39	226661_at	CDCA2	ENSG00000184661	cell division cycle associated 2 [Source:HGNC Symbol;Acc:HGNC:14623]	chr8	25459199	25507911	1	p21.2	39.63	protein_coding	3697
0.0059217	0.952	272.83	194.15	1.41	214507_s_at	EXOSC2	ENSG00000130713	exosome component 2 [Source:HGNC Symbol;Acc:HGNC:17097]	chr9	130693721	130704894	1	q34.12	47.74	protein_coding	4240
0.0001845	0.952	73.71	38.87	1.9	224942_at	PAPPA	ENSG00000182752	pappalysin 1 [Source:HGNC Symbol;Acc:HGNC:8602]	chr9	116153791	116402321	1	q33.1	42.35	protein_coding	11585
0.0006161	0.952	104.68	53.42	1.96	224941_at	PAPPA	ENSG00000182752	pappalysin 1 [Source:HGNC Symbol;Acc:HGNC:8602]	chr9	116153791	116402321	1	q33.1	42.35	protein_coding	11585
0.0024538	0.952	56.19	87.03	0.65	206698_at	XK	ENSG00000047597	X-linked Kx blood group [Source:HGNC Symbol;Acc:HGNC:12811]	chrX	37685791	37732130	1	p21.1	39.51	protein_coding	5174
0.0084801	0.952	65.64	47.78	1.37	225784_s_at	ZC4H2	ENSG00000126970	zinc finger C4H2-type containing [Source:HGNC Symbol;Acc:HGNC:24931]	chrX	64915802	65034713	-1	q11.2	39.24	protein_coding	5173
0.0086921	0.952	77.24	50.64	1.53	226875_at	DOCK11	ENSG00000147251	dedicator of cytokinesis 11 [Source:HGNC Symbol;Acc:HGNC:23483]	chrX	118495815	118686163	1	q24	39.7	protein_coding	6804
0.0050301	0.952	59.52	40.36	1.47	206645_s_at	NR0B1	ENSG00000169297	nuclear receptor subfamily 0 group B member 1 [Source:HGNC Symbol;Acc:HGNC:7960]	chrX	30304206	30309390	-1	p21.2	45.63	protein_coding	1995

## Sheet: GSE73064 Met vs Asc
Parametric p-value	FDR	Ascitic	Metastatic	Fold-change	ProbeSet	Gene_name	Gene_ID	Gene_description	Chromosome_scaffold_name	Gene_start_bp	Gene_end_bp	Strand	Karyotype_band	Gene_GC_content	Gene_type	Gene_Length
0.0015924	0.117	451.64	251	0.555752	223120_at	FUCA2	ENSG00000001036	alpha-L-fucosidase 2 [Source:HGNC Symbol;Acc:HGNC:4008]	chr6	143494812	143511720	-1	q24.2	39.72	protein_coding	2822
0.0049481	0.137	3751.88	1702.71	0.453828	201029_s_at	CD99	ENSG00000002586	CD99 molecule (Xg blood group) [Source:HGNC Symbol;Acc:HGNC:7082]	chrX	2691187	2741309	1	p22.33	47.38	protein_coding	4858
0.0020151	0.121	709.48	192.85	0.271819	218345_at	TMEM176A	ENSG00000002933	transmembrane protein 176A [Source:HGNC Symbol;Acc:HGNC:24930]	chr7	150800403	150805118	1	q36.1	57.55	protein_coding	3477
0.0032257	0.126	733.99	375.7	0.51186	38671_at	PLXND1	ENSG00000004399	plexin D1 [Source:HGNC Symbol;Acc:HGNC:9107]	chr3	129555214	129606676	-1	q22.1	58.3	protein_coding	9557
0.004472	0.134	129.87	243.05	1.87149	228030_at	RBM6	ENSG00000004534	RNA binding motif protein 6 [Source:HGNC Symbol;Acc:HGNC:9903]	chr3	49940007	50100045	1	p21.31	44.14	protein_coding	7299
4.25e-05	0.0772	824.56	286.6	0.347579	204362_at	SKAP2	ENSG00000005020	src kinase associated phosphoprotein 2 [Source:HGNC Symbol;Acc:HGNC:15687]	chr7	26667068	26995239	-1	p15.2	36.94	protein_coding	5361
0.0001302	0.0851	335.24	123.61	0.368721	225639_at	SKAP2	ENSG00000005020	src kinase associated phosphoprotein 2 [Source:HGNC Symbol;Acc:HGNC:15687]	chr7	26667068	26995239	-1	p15.2	36.94	protein_coding	5361
0.0006292	0.113	95.3	44.84	0.470514	216899_s_at	SKAP2	ENSG00000005020	src kinase associated phosphoprotein 2 [Source:HGNC Symbol;Acc:HGNC:15687]	chr7	26667068	26995239	-1	p15.2	36.94	protein_coding	5361
0.0042281	0.132	72.17	36.55	0.506443	204361_s_at	SKAP2	ENSG00000005020	src kinase associated phosphoprotein 2 [Source:HGNC Symbol;Acc:HGNC:15687]	chr7	26667068	26995239	-1	p15.2	36.94	protein_coding	5361
0.0003199	0.102	160.3	26.69	0.1665	1554240_a_at	ITGAL	ENSG00000005844	integrin subunit alpha L [Source:HGNC Symbol;Acc:HGNC:6148]	chr16	30472658	30523567	1	p11.2	50.45	protein_coding	9864
0.0074084	0.149	121.31	69.17	0.570192	213475_s_at	ITGAL	ENSG00000005844	integrin subunit alpha L [Source:HGNC Symbol;Acc:HGNC:6148]	chr16	30472658	30523567	1	p11.2	50.45	protein_coding	9864
0.0009136	0.115	1093.04	2046.46	1.87226	218368_s_at	TNFRSF12A	ENSG00000006327	TNF receptor superfamily member 12A [Source:HGNC Symbol;Acc:HGNC:18152]	chr16	3018445	3022383	1	p13.3	60.12	protein_coding	1801
0.0035056	0.128	37.54	78.17	2.08231	213927_at	MAP3K9	ENSG00000006432	mitogen-activated protein kinase kinase kinase 9 [Source:HGNC Symbol;Acc:HGNC:6861]	chr14	70722526	70809534	-1	q24.2	44.98	protein_coding	12386
0.0071987	0.148	239.76	380.68	1.58775	227371_at	BAIAP2L1	ENSG00000006453	BAR/IMD domain containing adaptor protein 2 like 1 [Source:HGNC Symbol;Acc:HGNC:21649]	chr7	98291650	98401090	-1	q22.1	46.78	protein_coding	4821
0.0078909	0.151	411.06	766.51	1.86472	227372_s_at	BAIAP2L1	ENSG00000006453	BAR/IMD domain containing adaptor protein 2 like 1 [Source:HGNC Symbol;Acc:HGNC:21649]	chr7	98291650	98401090	-1	q22.1	46.78	protein_coding	4821
0.009958	0.158	238.09	397.66	1.67021	222675_s_at	BAIAP2L1	ENSG00000006453	BAR/IMD domain containing adaptor protein 2 like 1 [Source:HGNC Symbol;Acc:HGNC:21649]	chr7	98291650	98401090	-1	q22.1	46.78	protein_coding	4821
0.0001872	0.0851	319.65	139.72	0.437103	205640_at	ALDH3B1	ENSG00000006534	aldehyde dehydrogenase 3 family member B1 [Source:HGNC Symbol;Acc:HGNC:410]	chr11	68008578	68029282	1	q13.2	58.4	protein_coding	6626
0.0031039	0.126	243.06	122.77	0.505102	211004_s_at	ALDH3B1	ENSG00000006534	aldehyde dehydrogenase 3 family member B1 [Source:HGNC Symbol;Acc:HGNC:410]	chr11	68008578	68029282	1	q13.2	58.4	protein_coding	6626
0.0084084	0.153	338.41	227.6	0.672557	223696_at	ARSD	ENSG00000006756	arylsulfatase D [Source:HGNC Symbol;Acc:HGNC:717]	chrX	2903972	2929349	-1	p22.33	48.88	protein_coding	7026
0.0080552	0.152	604.81	857.14	1.41721	201346_at	ADIPOR2	ENSG00000006831	adiponectin receptor 2 [Source:HGNC Symbol;Acc:HGNC:24041]	chr12	1688574	1788674	1	p13.33	39.4	protein_coding	5831
0.0068277	0.147	296.57	93.89	0.316586	202191_s_at	GAS7	ENSG00000007237	growth arrest specific 7 [Source:HGNC Symbol;Acc:HGNC:4169]	chr17	9910606	10198606	-1	p13.1	47.97	protein_coding	10158
0.0092712	0.156	395.19	128.61	0.325438	202192_s_at	GAS7	ENSG00000007237	growth arrest specific 7 [Source:HGNC Symbol;Acc:HGNC:4169]	chr17	9910606	10198606	-1	p13.1	47.97	protein_coding	10158
0.0098382	0.158	162.69	51.97	0.319442	211067_s_at	GAS7	ENSG00000007237	growth arrest specific 7 [Source:HGNC Symbol;Acc:HGNC:4169]	chr17	9910606	10198606	-1	p13.1	47.97	protein_coding	10158
0.0046337	0.135	55.51	36.89	0.664565	240674_at	JARID2	ENSG00000008083	jumonji and AT-rich interaction domain containing 2 [Source:HGNC Symbol;Acc:HGNC:6196]	chr6	15246069	15522042	1	p22.3	43.92	protein_coding	6244
0.0051252	0.137	81.76	165.31	2.02189	228157_at	ZNF207	ENSG00000010244	zinc finger protein 207 [Source:HGNC Symbol;Acc:HGNC:12998]	chr17	32350132	32381885	1	q11.2	38.46	protein_coding	15818
0.0007874	0.113	210.66	76.33	0.362337	36030_at	IFFO1	ENSG00000010295	intermediate filament family orphan 1 [Source:HGNC Symbol;Acc:HGNC:24970]	chr12	6538961	6556073	-1	p13.31	54.33	protein_coding	4945
0.0004901	0.105	899.68	143.47	0.159468	38487_at	STAB1	ENSG00000010327	stabilin 1 [Source:HGNC Symbol;Acc:HGNC:18628]	chr3	52495338	52524495	1	p21.1	60.65	protein_coding	10588
0.0020442	0.121	435.3	79.67	0.183023	204150_at	STAB1	ENSG00000010327	stabilin 1 [Source:HGNC Symbol;Acc:HGNC:18628]	chr3	52495338	52524495	1	p21.1	60.65	protein_coding	10588
0.004572	0.135	96.2	54.98	0.571518	212486_s_at	FYN	ENSG00000010810	FYN proto-oncogene, Src family tyrosine kinase [Source:HGNC Symbol;Acc:HGNC:4037]	chr6	111660332	111873452	-1	q21	42.42	protein_coding	7411
0.0018604	0.121	1999.68	147.5	0.0737618	204122_at	TYROBP	ENSG00000011600	transmembrane immune signaling adaptor TYROBP [Source:HGNC Symbol;Acc:HGNC:12449]	chr19	35904401	35908295	-1	q13.12	51.45	protein_coding	907
0.0095645	0.157	385.94	185.92	0.481733	203912_s_at	DNASE1L1	ENSG00000013563	deoxyribonuclease 1 like 1 [Source:HGNC Symbol;Acc:HGNC:2957]	chrX	154401236	154412112	-1	q28	54.46	protein_coding	4132
0.0039519	0.13	22.48	39.6	1.76157	215343_at	CCDC88C	ENSG00000015133	coiled-coil domain containing 88C [Source:HGNC Symbol;Acc:HGNC:19967]	chr14	91271323	91417844	-1	q32.12	51.25	protein_coding	12426
0.0023989	0.122	80.75	162.09	2.00731	242260_at	MATR3	ENSG00000015479	matrin 3 [Source:HGNC Symbol;Acc:HGNC:6912]	chr5	139293674	139331677	1	q31.2	38.77	protein_coding	12064
0.0080165	0.151	127.16	82.97	0.652485	225113_at	AGPS	ENSG00000018510	alkylglycerone phosphate synthase [Source:HGNC Symbol;Acc:HGNC:327]	chr2	177392746	177567024	1	q31.2	36.6	protein_coding	15223
0.0047489	0.136	921.31	2695.18	2.92538	212268_at	SERPINB1	ENSG00000021355	serpin family B member 1 [Source:HGNC Symbol;Acc:HGNC:3311]	chr6	2832332	2841959	-1	p25.2	43.07	protein_coding	3047
0.0095129	0.157	52.28	78.94	1.50995	220135_s_at	SLC7A9	ENSG00000021488	solute carrier family 7 member 9 [Source:HGNC Symbol;Acc:HGNC:11067]	chr19	32830509	32869767	-1	q13.11	46.63	protein_coding	2598
0.0062092	0.143	526.44	314.83	0.598036	206050_s_at	RNH1	ENSG00000023191	ribonuclease/angiogenin inhibitor 1 [Source:HGNC Symbol;Acc:HGNC:10074]	chr11	494512	507300	-1	p15.5	60.36	protein_coding	7374
0.0041714	0.132	172.63	708.91	4.10653	210538_s_at	BIRC3	ENSG00000023445	baculoviral IAP repeat containing 3 [Source:HGNC Symbol;Acc:HGNC:591]	chr11	102317450	102339403	1	q22.2	37.6	protein_coding	7518
0.0085487	0.153	183.74	105.68	0.575161	222958_s_at	DEPDC1	ENSG00000024526	DEP domain containing 1 [Source:HGNC Symbol;Acc:HGNC:22949]	chr1	68474152	68497221	-1	p31.3	34.94	protein_coding	5904
0.002549	0.122	12597.2	6057.85	0.480889	201426_s_at	VIM	ENSG00000026025	vimentin [Source:HGNC Symbol;Acc:HGNC:12692]	chr10	17228241	17237593	1	p13	46.3	protein_coding	5176
0.000437	0.105	126.83	270.28	2.13104	223586_at	ARNTL2	ENSG00000029153	aryl hydrocarbon receptor nuclear translocator like 2 [Source:HGNC Symbol;Acc:HGNC:18984]	chr12	27332854	27425289	1	p11.23	39.26	protein_coding	6983
0.003054	0.125	162.06	284.55	1.75583	224204_x_at	ARNTL2	ENSG00000029153	aryl hydrocarbon receptor nuclear translocator like 2 [Source:HGNC Symbol;Acc:HGNC:18984]	chr12	27332854	27425289	1	p11.23	39.26	protein_coding	6983
0.0081869	0.152	70.22	104.65	1.49032	212709_at	NUP160	ENSG00000030066	nucleoporin 160 [Source:HGNC Symbol;Acc:HGNC:18017]	chr11	47778087	47848555	-1	p11.2	41.86	protein_coding	8576
0.0012664	0.115	2340.51	1094.29	0.467543	216041_x_at	GRN	ENSG00000030582	granulin precursor [Source:HGNC Symbol;Acc:HGNC:4601]	chr17	44345246	44353106	1	q21.31	57.73	protein_coding	3524
0.0014635	0.116	1126.95	515.98	0.457855	211284_s_at	GRN	ENSG00000030582	granulin precursor [Source:HGNC Symbol;Acc:HGNC:4601]	chr17	44345246	44353106	1	q21.31	57.73	protein_coding	3524
0.0020074	0.121	2365.54	1081.52	0.457198	200678_x_at	GRN	ENSG00000030582	granulin precursor [Source:HGNC Symbol;Acc:HGNC:4601]	chr17	44345246	44353106	1	q21.31	57.73	protein_coding	3524
0.0008664	0.115	279.66	165.38	0.591361	203718_at	PNPLA6	ENSG00000032444	patatin like phospholipase domain containing 6 [Source:HGNC Symbol;Acc:HGNC:16268]	chr19	7534004	7561764	1	p13.2	55.88	protein_coding	7161
0.0001859	0.0851	491.72	133.23	0.270947	203167_at	TIMP2	ENSG00000035862	TIMP metallopeptidase inhibitor 2 [Source:HGNC Symbol;Acc:HGNC:11821]	chr17	78852977	78925387	-1	q25.3	52.6	protein_coding	5633
0.001399	0.115	2207.27	734.16	0.33261	231579_s_at	TIMP2	ENSG00000035862	TIMP metallopeptidase inhibitor 2 [Source:HGNC Symbol;Acc:HGNC:11821]	chr17	78852977	78925387	-1	q25.3	52.6	protein_coding	5633
0.003218	0.126	1683.28	574.85	0.341506	224560_at	TIMP2	ENSG00000035862	TIMP metallopeptidase inhibitor 2 [Source:HGNC Symbol;Acc:HGNC:11821]	chr17	78852977	78925387	-1	q25.3	52.6	protein_coding	5633
0.0023709	0.122	342.01	198.52	0.580451	204332_s_at	AGA	ENSG00000038002	aspartylglucosaminidase [Source:HGNC Symbol;Acc:HGNC:318]	chr4	177430774	177442437	-1	q34.3	39.69	protein_coding	2605
0.0008899	0.115	635.78	142.3	0.22382	221731_x_at	VCAN	ENSG00000038427	versican [Source:HGNC Symbol;Acc:HGNC:2464]	chr5	83471618	83582303	1	q14.2	37.18	protein_coding	14678
0.0044242	0.134	120.45	17.16	0.142466	214770_at	MSR1	ENSG00000038945	macrophage scavenger receptor 1 [Source:HGNC Symbol;Acc:HGNC:7376]	chr8	16107878	16567490	-1	p22	35.52	protein_coding	7812
0.0062728	0.143	43.66	68.6	1.57123	201130_s_at	CDH1	ENSG00000039068	cadherin 1 [Source:HGNC Symbol;Acc:HGNC:1748]	chr16	68737292	68835537	1	q22.1	46.88	protein_coding	6076
0.0049782	0.137	246.27	354.76	1.44053	223200_s_at	LSG1	ENSG00000041802	large 60S subunit nuclear export GTPase 1 [Source:HGNC Symbol;Acc:HGNC:25652]	chr3	194640791	194672463	-1	q29	41.68	protein_coding	4801
0.0046553	0.135	50.27	32.52	0.646907	219583_s_at	SPATA7	ENSG00000042317	spermatogenesis associated 7 [Source:HGNC Symbol;Acc:HGNC:20423]	chr14	88384924	88470350	1	q31.3	37.9	protein_coding	6872
0.0032304	0.126	1915.55	931.58	0.486325	211047_x_at	AP2S1	ENSG00000042753	adaptor related protein complex 2 subunit sigma 1 [Source:HGNC Symbol;Acc:HGNC:565]	chr19	46838136	46850846	-1	q13.32	52.84	protein_coding	1558
0.0034937	0.128	781.9	372.09	0.475879	202120_x_at	AP2S1	ENSG00000042753	adaptor related protein complex 2 subunit sigma 1 [Source:HGNC Symbol;Acc:HGNC:565]	chr19	46838136	46850846	-1	q13.32	52.84	protein_coding	1558
0.0073751	0.149	1448.29	645.4	0.445629	208074_s_at	AP2S1	ENSG00000042753	adaptor related protein complex 2 subunit sigma 1 [Source:HGNC Symbol;Acc:HGNC:565]	chr19	46838136	46850846	-1	q13.32	52.84	protein_coding	1558
0.005817	0.141	271.41	133.28	0.491065	212660_at	JADE2	ENSG00000043143	jade family PHD finger 2 [Source:HGNC Symbol;Acc:HGNC:22984]	chr5	134524312	134583230	1	q31.1	53.79	protein_coding	11091
0.0025958	0.122	279.98	67.1	0.23966	205270_s_at	LCP2	ENSG00000043462	lymphocyte cytosolic protein 2 [Source:HGNC Symbol;Acc:HGNC:6529]	chr5	170246233	170297815	-1	q35.1	44.62	protein_coding	6823
0.0056648	0.14	50.23	15.36	0.305793	205269_at	LCP2	ENSG00000043462	lymphocyte cytosolic protein 2 [Source:HGNC Symbol;Acc:HGNC:6529]	chr5	170246233	170297815	-1	q35.1	44.62	protein_coding	6823
0.0054129	0.14	102.9	191.37	1.85977	209168_at	GPM6B	ENSG00000046653	glycoprotein M6B [Source:HGNC Symbol;Acc:HGNC:4461]	chrX	13770939	13938638	-1	p22.2	41.49	protein_coding	5767
0.0051872	0.138	65.03	41.59	0.639551	205836_s_at	YTHDC2	ENSG00000047188	YTH domain containing 2 [Source:HGNC Symbol;Acc:HGNC:24721]	chr5	113513694	113595285	1	q22.2	34.67	protein_coding	10805
0.0044699	0.134	247.96	375.12	1.51282	213618_at	ARAP2	ENSG00000047365	ArfGAP with RhoGAP domain, ankyrin repeat and PH domain 2 [Source:HGNC Symbol;Acc:HGNC:16924]	chr4	35948221	36244514	-1	p14	35.53	protein_coding	12427
0.0056028	0.14	194.78	308.6	1.58435	227101_at	ZNF800	ENSG00000048405	zinc finger protein 800 [Source:HGNC Symbol;Acc:HGNC:27267]	chr7	127346790	127431924	-1	q31.33	37.8	protein_coding	5793
0.0001688	0.0851	773.6	305.44	0.394829	202157_s_at	CELF2	ENSG00000048740	CUGBP Elav-like family member 2 [Source:HGNC Symbol;Acc:HGNC:2550]	chr10	10798397	11336675	1	p14	41.91	protein_coding	10978
0.0002804	0.0968	160.98	63.85	0.396633	202156_s_at	CELF2	ENSG00000048740	CUGBP Elav-like family member 2 [Source:HGNC Symbol;Acc:HGNC:2550]	chr10	10798397	11336675	1	p14	41.91	protein_coding	10978
0.0004973	0.105	144.75	60.43	0.417478	202158_s_at	CELF2	ENSG00000048740	CUGBP Elav-like family member 2 [Source:HGNC Symbol;Acc:HGNC:2550]	chr10	10798397	11336675	1	p14	41.91	protein_coding	10978
0.0014401	0.115	2941.57	1044.94	0.355232	201944_at	HEXB	ENSG00000049860	hexosaminidase subunit beta [Source:HGNC Symbol;Acc:HGNC:4879]	chr5	74640023	74722647	1	q13.3	42.11	protein_coding	5015
0.0019654	0.121	707.71	397.27	0.561346	223215_s_at	JKAMP	ENSG00000050130	JNK1/MAPK8 associated membrane protein [Source:HGNC Symbol;Acc:HGNC:20184]	chr14	59484443	59505410	1	q23.1	36.78	protein_coding	4350
0.0050142	0.137	90.98	143.61	1.57848	228596_at	ARHGEF5	ENSG00000050327	Rho guanine nucleotide exchange factor 5 [Source:HGNC Symbol;Acc:HGNC:13209]	chr7	144355288	144380632	1	q35	48.06	protein_coding	5818
0.0051529	0.137	147.37	292.45	1.98446	227451_s_at	MCUR1	ENSG00000050393	mitochondrial calcium uniporter regulator 1 [Source:HGNC Symbol;Acc:HGNC:21097]	chr6	13786557	13814568	-1	p23	41.24	protein_coding	6057
0.0034773	0.128	101.87	56.93	0.55885	215489_x_at	HOMER3	ENSG00000051128	homer scaffold protein 3 [Source:HGNC Symbol;Acc:HGNC:17514]	chr19	18929201	18941261	-1	p13.11	56.77	protein_coding	3422
0.008353	0.153	770.09	1163.68	1.5111	209234_at	KIF1B	ENSG00000054523	kinesin family member 1B [Source:HGNC Symbol;Acc:HGNC:16636]	chr1	10210570	10381603	1	p36.22	42.04	protein_coding	17955
0.0035335	0.128	337.05	215.43	0.639163	33778_at	TBC1D22A	ENSG00000054611	TBC1 domain family member 22A [Source:HGNC Symbol;Acc:HGNC:1309]	chr22	46762617	47175699	1	q13.31	49.42	protein_coding	5315
0.0057348	0.141	365.28	150.8	0.412834	204417_at	GALC	ENSG00000054983	galactosylceramidase [Source:HGNC Symbol;Acc:HGNC:4115]	chr14	87837820	87993665	-1	q31.3	39.12	protein_coding	6736
0.0033668	0.128	59.32	35.79	0.603338	218588_s_at	FAM114A2	ENSG00000055147	family with sequence similarity 114 member A2 [Source:HGNC Symbol;Acc:HGNC:1333]	chr5	153990148	154038936	-1	q33.2	37.35	protein_coding	6523
0.0027205	0.122	465.8	255.57	0.548669	218646_at	HPF1	ENSG00000056050	histone PARylation factor 1 [Source:HGNC Symbol;Acc:HGNC:26051]	chr4	169729470	169757944	-1	q33	38.61	protein_coding	1422
0.0063978	0.144	58.89	85.59	1.45339	224361_s_at	IL17RB	ENSG00000056736	interleukin 17 receptor B [Source:HGNC Symbol;Acc:HGNC:18015]	chr3	53846568	53865794	1	p21.1	45.39	protein_coding	3044
0.0088067	0.153	32.13	52.7	1.64021	219255_x_at	IL17RB	ENSG00000056736	interleukin 17 receptor B [Source:HGNC Symbol;Acc:HGNC:18015]	chr3	53846568	53865794	1	p21.1	45.39	protein_coding	3044
0.0083109	0.153	69.53	44.38	0.638286	244661_at	SOAT1	ENSG00000057252	sterol O-acyltransferase 1 [Source:HGNC Symbol;Acc:HGNC:11177]	chr1	179293714	179358680	1	q25.2	39.63	protein_coding	7005
0.0007062	0.113	393.99	2309.88	5.86279	202267_at	LAMC2	ENSG00000058085	laminin subunit gamma 2 [Source:HGNC Symbol;Acc:HGNC:6493]	chr1	183186238	183245127	1	q25.3	43.26	protein_coding	6770
0.0023781	0.122	93.82	480.6	5.12258	207517_at	LAMC2	ENSG00000058085	laminin subunit gamma 2 [Source:HGNC Symbol;Acc:HGNC:6493]	chr1	183186238	183245127	1	q25.3	43.26	protein_coding	6770
0.001395	0.115	83.2	40.81	0.490505	206877_at	MXD1	ENSG00000059728	MAX dimerization protein 1 [Source:HGNC Symbol;Acc:HGNC:6761]	chr2	69897688	69942945	1	p13.3	40.74	protein_coding	6351
0.0002238	0.0904	543.41	102.07	0.187832	202499_s_at	SLC2A3	ENSG00000059804	solute carrier family 2 member 3 [Source:HGNC Symbol;Acc:HGNC:11007]	chr12	7919230	7936187	-1	p13.31	44.55	protein_coding	6071
0.0003161	0.102	186.07	65.41	0.351534	202498_s_at	SLC2A3	ENSG00000059804	solute carrier family 2 member 3 [Source:HGNC Symbol;Acc:HGNC:11007]	chr12	7919230	7936187	-1	p13.31	44.55	protein_coding	6071
0.0011676	0.115	339.79	84.96	0.250037	202497_x_at	SLC2A3	ENSG00000059804	solute carrier family 2 member 3 [Source:HGNC Symbol;Acc:HGNC:11007]	chr12	7919230	7936187	-1	p13.31	44.55	protein_coding	6071
0.0041643	0.132	335.65	691.88	2.06131	231697_s_at	VMP1	ENSG00000062716	vacuole membrane protein 1 [Source:HGNC Symbol;Acc:HGNC:29559]	chr17	59707192	59842255	1	q23.1	39.75	protein_coding	6854
0.0025831	0.122	2116.54	1153.63	0.545055	200661_at	CTSA	ENSG00000064601	cathepsin A [Source:HGNC Symbol;Acc:HGNC:9251]	chr20	45890144	45898949	1	q13.12	56.09	protein_coding	8633
5.27e-05	0.0798	210.73	590.3	2.80121	204404_at	SLC12A2	ENSG00000064651	solute carrier family 12 member 2 [Source:HGNC Symbol;Acc:HGNC:10911]	chr5	128083766	128189677	1	q23.3	35.24	protein_coding	10653
0.002641	0.122	118.55	195.96	1.65297	225835_at	SLC12A2	ENSG00000064651	solute carrier family 12 member 2 [Source:HGNC Symbol;Acc:HGNC:10911]	chr5	128083766	128189677	1	q23.3	35.24	protein_coding	10653
0.0039071	0.13	410.49	241.65	0.588687	201605_x_at	CNN2	ENSG00000064666	calponin 2 [Source:HGNC Symbol;Acc:HGNC:2156]	chr19	1026586	1039068	1	p13.3	59.72	protein_coding	3640
0.0010991	0.115	57.26	30.55	0.533531	228471_at	ANKRD44	ENSG00000065413	ankyrin repeat domain 44 [Source:HGNC Symbol;Acc:HGNC:25259]	chr2	196967017	197311173	-1	q33.1	40.24	protein_coding	12826
6.34e-05	0.0815	727.98	1731.02	2.37784	201996_s_at	SPEN	ENSG00000065526	spen family transcriptional repressor [Source:HGNC Symbol;Acc:HGNC:17575]	chr1	15836095	15940456	1	p36.21	43.57	protein_coding	14336
0.0001023	0.0837	1113.27	2759.38	2.47863	201997_s_at	SPEN	ENSG00000065526	spen family transcriptional repressor [Source:HGNC Symbol;Acc:HGNC:17575]	chr1	15836095	15940456	1	p36.21	43.57	protein_coding	14336
0.0004778	0.105	289.89	669.46	2.30936	1556059_s_at	SPEN	ENSG00000065526	spen family transcriptional repressor [Source:HGNC Symbol;Acc:HGNC:17575]	chr1	15836095	15940456	1	p36.21	43.57	protein_coding	14336
0.001342	0.115	247.66	100.12	0.404264	219079_at	CYB5R4	ENSG00000065615	cytochrome b5 reductase 4 [Source:HGNC Symbol;Acc:HGNC:20147]	chr6	83859656	83967423	1	q14.2	37.45	protein_coding	9621
0.002974	0.124	516.93	304.71	0.589461	212350_at	TBC1D1	ENSG00000065882	TBC1 domain family member 1 [Source:HGNC Symbol;Acc:HGNC:11578]	chr4	37891084	38139175	1	p14	42.84	protein_coding	9035
0.0006867	0.113	350.07	583.62	1.66715	207318_s_at	CDK13	ENSG00000065883	cyclin dependent kinase 13 [Source:HGNC Symbol;Acc:HGNC:1733]	chr7	39950121	40099580	1	p14.1	38.73	protein_coding	24618
0.005632	0.14	2375.52	4663.74	1.96325	201761_at	MTHFD2	ENSG00000065911	methylenetetrahydrofolate dehydrogenase (NADP+ dependent) 2, methenyltetrahydrofolate cyclohydrolase [Source:HGNC Symbol;Acc:HGNC:7434]	chr2	74186172	74217565	1	p13.1	43.85	protein_coding	11443
0.0045735	0.135	362.79	188.19	0.51873	204735_at	PDE4A	ENSG00000065989	phosphodiesterase 4A [Source:HGNC Symbol;Acc:HGNC:8780]	chr19	10416773	10469630	1	p13.2	54.53	protein_coding	6762
0.0094563	0.156	204.7	105.08	0.513337	219918_s_at	ASPM	ENSG00000066279	assembly factor for spindle microtubules [Source:HGNC Symbol;Acc:HGNC:19048]	chr1	197084121	197146694	-1	q31.3	34.66	protein_coding	11994
0.0075653	0.15	386.12	73.62	0.190666	205988_at	CD84	ENSG00000066294	CD84 molecule [Source:HGNC Symbol;Acc:HGNC:1704]	chr1	160541095	160579516	-1	q23.3	41.6	protein_coding	9255
0.0083365	0.153	79.84	15.17	0.190005	211192_s_at	CD84	ENSG00000066294	CD84 molecule [Source:HGNC Symbol;Acc:HGNC:1704]	chr1	160541095	160579516	-1	q23.3	41.6	protein_coding	9255
0.0083833	0.153	482.11	58.54	0.121425	230391_at	CD84	ENSG00000066294	CD84 molecule [Source:HGNC Symbol;Acc:HGNC:1704]	chr1	160541095	160579516	-1	q23.3	41.6	protein_coding	9255
0.0068099	0.147	8478.94	4888.01	0.576488	200059_s_at	RHOA	ENSG00000067560	ras homolog family member A [Source:HGNC Symbol;Acc:HGNC:667]	chr3	49359139	49412998	-1	p21.31	46.57	protein_coding	4805
0.002193	0.122	151.15	95.31	0.630566	218394_at	ROGDI	ENSG00000067836	rogdi atypical leucine zipper [Source:HGNC Symbol;Acc:HGNC:29478]	chr16	4796968	4802880	-1	p13.3	63.01	protein_coding	3613
0.0073646	0.149	124.04	69.76	0.562399	221957_at	PDK3	ENSG00000067992	pyruvate dehydrogenase kinase 3 [Source:HGNC Symbol;Acc:HGNC:8811]	chrX	24465270	24550466	1	p22.11	40.79	protein_coding	13506
0.0038507	0.129	131.58	71.09	0.54028	1557121_s_at	HEATR6	ENSG00000068097	HEAT repeat containing 6 [Source:HGNC Symbol;Acc:HGNC:24076]	chr17	60041008	60078922	-1	q23.1	40.88	protein_coding	7045
0.0015995	0.117	569.14	305.03	0.535949	228273_at	PRR11	ENSG00000068489	proline rich 11 [Source:HGNC Symbol;Acc:HGNC:25619]	chr17	59155732	59206709	1	q22	44.35	protein_coding	6743
0.0047906	0.136	78.29	49.91	0.637502	208206_s_at	RASGRP2	ENSG00000068831	RAS guanyl releasing protein 2 [Source:HGNC Symbol;Acc:HGNC:9879]	chr11	64726911	64745456	-1	q13.1	55.63	protein_coding	6084
0.0078324	0.151	588.08	1496.55	2.54481	40016_g_at	MAST4	ENSG00000069020	microtubule associated serine/threonine kinase family member 4 [Source:HGNC Symbol;Acc:HGNC:19037]	chr5	66596361	67169595	1	q12.3	39.2	protein_coding	14675
0.008327	0.153	265.65	760.58	2.86309	225613_at	MAST4	ENSG00000069020	microtubule associated serine/threonine kinase family member 4 [Source:HGNC Symbol;Acc:HGNC:19037]	chr5	66596361	67169595	1	q12.3	39.2	protein_coding	14675
0.0034784	0.128	261.74	113.9	0.435165	203402_at	KCNAB2	ENSG00000069424	potassium voltage-gated channel subfamily A regulatory beta subunit 2 [Source:HGNC Symbol;Acc:HGNC:6229]	chr1	5990927	6101193	1	p36.31	56.04	protein_coding	17329
0.0028941	0.124	117.24	73.78	0.629307	205452_at	PIGB	ENSG00000069943	phosphatidylinositol glycan anchor biosynthesis class B [Source:HGNC Symbol;Acc:HGNC:8959]	chr15	55318960	55355648	1	q21.3	39.99	protein_coding	4542
0.0078784	0.151	303.79	514.56	1.6938	225745_at	LRP6	ENSG00000070018	LDL receptor related protein 6 [Source:HGNC Symbol;Acc:HGNC:6698]	chr12	12116025	12267044	-1	p13.2	38.54	protein_coding	10369
0.0007687	0.113	38.76	90.8	2.34262	236707_at	DAPP1	ENSG00000070190	dual adaptor of phosphotyrosine and 3-phosphoinositides 1 [Source:HGNC Symbol;Acc:HGNC:16500]	chr4	99816827	99870190	1	q23	38.7	protein_coding	4590
0.004278	0.132	109.15	399.27	3.65799	222858_s_at	DAPP1	ENSG00000070190	dual adaptor of phosphotyrosine and 3-phosphoinositides 1 [Source:HGNC Symbol;Acc:HGNC:16500]	chr4	99816827	99870190	1	q23	38.7	protein_coding	4590
0.0059976	0.143	758.7	1200.86	1.58279	203616_at	POLB	ENSG00000070501	DNA polymerase beta [Source:HGNC Symbol;Acc:HGNC:9174]	chr8	42338454	42371808	1	p11.21	40.44	protein_coding	4106
0.0070228	0.147	283.02	469.3	1.65819	224627_at	GBA2	ENSG00000070610	glucosylceramidase beta 2 [Source:HGNC Symbol;Acc:HGNC:18986]	chr9	35736866	35749228	-1	p13.3	50.7	protein_coding	4803
0.0074481	0.149	163.54	243.27	1.48753	223921_s_at	GBA2	ENSG00000070610	glucosylceramidase beta 2 [Source:HGNC Symbol;Acc:HGNC:18986]	chr9	35736866	35749228	-1	p13.3	50.7	protein_coding	4803
0.0065768	0.145	759.92	471.86	0.620934	202053_s_at	ALDH3A2	ENSG00000072210	aldehyde dehydrogenase 3 family member A2 [Source:HGNC Symbol;Acc:HGNC:403]	chr17	19648136	19685760	1	p11.2	45.09	protein_coding	15331
0.0028977	0.124	231.29	132.2	0.571577	207165_at	HMMR	ENSG00000072571	hyaluronan mediated motility receptor [Source:HGNC Symbol;Acc:HGNC:5012]	chr5	163460203	163491941	1	q34	36.97	protein_coding	3932
0.0038046	0.129	196.09	91.3	0.465603	209709_s_at	HMMR	ENSG00000072571	hyaluronan mediated motility receptor [Source:HGNC Symbol;Acc:HGNC:5012]	chr5	163460203	163491941	1	q34	36.97	protein_coding	3932
0.0001443	0.0851	301.48	29.54	0.0979833	210889_s_at	FCGR2B	ENSG00000072694	Fc fragment of IgG receptor IIb [Source:HGNC Symbol;Acc:HGNC:3618]	chr1	161663147	161678654	1	q23.3	47.24	protein_coding	6651
0.0050166	0.137	70	43.36	0.619429	205213_at	ACAP1	ENSG00000072818	ArfGAP with coiled-coil, ankyrin repeat and PH domains 1 [Source:HGNC Symbol;Acc:HGNC:16467]	chr17	7336529	7351477	1	p13.1	54.55	protein_coding	7420
0.0052039	0.138	70.24	102.91	1.46512	226047_at	IRAG1	ENSG00000072952	inositol 1,4,5-triphosphate receptor associated 1 [Source:HGNC Symbol;Acc:HGNC:7237]	chr11	10573091	10693988	-1	p15.4	45.65	protein_coding	7700
0.0027025	0.122	522.16	313.18	0.599778	223024_at	AP1M1	ENSG00000072958	adaptor related protein complex 1 subunit mu 1 [Source:HGNC Symbol;Acc:HGNC:13667]	chr19	16197854	16245906	1	p13.11	51.53	protein_coding	14094
0.0064161	0.144	41.22	116.36	2.8229	206249_at	MAP3K13	ENSG00000073803	mitogen-activated protein kinase kinase kinase 13 [Source:HGNC Symbol;Acc:HGNC:6852]	chr3	185282941	185489094	1	q27.2	40.07	protein_coding	12604
0.0075009	0.15	433.68	704.63	1.62477	209572_s_at	EED	ENSG00000074266	embryonic ectoderm development [Source:HGNC Symbol;Acc:HGNC:3188]	chr11	86244753	86278813	1	q14.2	37.04	protein_coding	6807
0.0057211	0.141	122.98	86.57	0.703936	204318_s_at	GTSE1	ENSG00000075218	G2 and S-phase expressed 1 [Source:HGNC Symbol;Acc:HGNC:13698]	chr22	46296870	46330810	1	q13.31	50.08	protein_coding	4113
0.0093915	0.156	48.01	69.08	1.43887	217201_at	RASAL2	ENSG00000075391	RAS protein activator like 2 [Source:HGNC Symbol;Acc:HGNC:9874]	chr1	178094104	178484147	1	q25.2	37	protein_coding	16081
0.0067772	0.147	637.01	1027.16	1.61247	202871_at	TRAF4	ENSG00000076604	TNF receptor associated factor 4 [Source:HGNC Symbol;Acc:HGNC:12034]	chr17	28744005	28750956	1	q11.2	59.58	protein_coding	4573
0.0090108	0.154	81.87	124.76	1.52388	211899_s_at	TRAF4	ENSG00000076604	TNF receptor associated factor 4 [Source:HGNC Symbol;Acc:HGNC:12034]	chr17	28744005	28750956	1	q11.2	59.58	protein_coding	4573
0.0098591	0.158	261.56	736.83	2.81706	211340_s_at	MCAM	ENSG00000076706	melanoma cell adhesion molecule [Source:HGNC Symbol;Acc:HGNC:6934]	chr11	119308529	119321521	-1	q23.3	59.59	protein_coding	7422
0.0005567	0.112	414.34	87.73	0.211734	230925_at	APBB1IP	ENSG00000077420	amyloid beta precursor protein binding family B member 1 interacting protein [Source:HGNC Symbol;Acc:HGNC:17379]	chr10	26438341	26567803	1	p12.1	41.53	protein_coding	3843
0.0052045	0.138	435.1	172.94	0.397472	204137_at	GPR137B	ENSG00000077585	G protein-coupled receptor 137B [Source:HGNC Symbol;Acc:HGNC:11862]	chr1	236142505	236221865	1	q42.3	43.63	protein_coding	2307
0.0061187	0.143	67.84	48.75	0.718603	235024_at	JADE1	ENSG00000077684	jade family PHD finger 1 [Source:HGNC Symbol;Acc:HGNC:30027]	chr4	128809700	128875224	1	q28.2	44.2	protein_coding	9052
0.001707	0.119	72.82	45.62	0.626476	203962_s_at	NEBL	ENSG00000078114	nebulette [Source:HGNC Symbol;Acc:HGNC:16932]	chr10	20779973	21293011	-1	p12.31	39.95	protein_coding	17810
0.000105	0.0837	252.97	1110.01	4.38791	218995_s_at	EDN1	ENSG00000078401	endothelin 1 [Source:HGNC Symbol;Acc:HGNC:3176]	chr6	12290361	12297194	1	p24.1	42.83	protein_coding	2035
0.0002488	0.092	385.31	2210.7	5.73746	222802_at	EDN1	ENSG00000078401	endothelin 1 [Source:HGNC Symbol;Acc:HGNC:3176]	chr6	12290361	12297194	1	p24.1	42.83	protein_coding	2035
0.0025935	0.122	67.43	125.97	1.86816	1564630_at	EDN1	ENSG00000078401	endothelin 1 [Source:HGNC Symbol;Acc:HGNC:3176]	chr6	12290361	12297194	1	p24.1	42.83	protein_coding	2035
0.0061474	0.143	17.21	10.86	0.631028	207777_s_at	SP140	ENSG00000079263	SP140 nuclear body protein [Source:HGNC Symbol;Acc:HGNC:17133]	chr2	230203110	230313215	1	q37.1	41.29	protein_coding	5582
0.0023914	0.122	32.21	48.43	1.50357	233781_s_at	RIF1	ENSG00000080345	replication timing regulatory factor 1 [Source:HGNC Symbol;Acc:HGNC:23207]	chr2	151409883	151508013	1	q23.3	38.04	protein_coding	18166
0.0086864	0.153	48.83	81.09	1.66066	241820_at	RIF1	ENSG00000080345	replication timing regulatory factor 1 [Source:HGNC Symbol;Acc:HGNC:23207]	chr2	151409883	151508013	1	q23.3	38.04	protein_coding	18166
0.0094693	0.156	187.12	137.02	0.732257	204172_at	CPOX	ENSG00000080819	coproporphyrinogen oxidase [Source:HGNC Symbol;Acc:HGNC:2321]	chr3	98579446	98593648	-1	q11.2	40.35	protein_coding	3157
0.0011128	0.115	479.1	772.91	1.61325	1554149_at	CLDND1	ENSG00000080822	claudin domain containing 1 [Source:HGNC Symbol;Acc:HGNC:1322]	chr3	98497912	98523066	-1	q11.2	38.91	protein_coding	5210
0.0070326	0.147	138.91	214.66	1.54532	208925_at	CLDND1	ENSG00000080822	claudin domain containing 1 [Source:HGNC Symbol;Acc:HGNC:1322]	chr3	98497912	98523066	-1	q11.2	38.91	protein_coding	5210
0.0022497	0.122	84.82	140.46	1.65598	222791_at	RSBN1	ENSG00000081019	round spermatid basic protein 1 [Source:HGNC Symbol;Acc:HGNC:25642]	chr1	113761832	113812476	-1	p13.2	37.22	protein_coding	6819
0.0051344	0.137	103.72	57.75	0.556788	235197_s_at	OSTM1	ENSG00000081087	osteoclastogenesis associated transmembrane protein 1 [Source:HGNC Symbol;Acc:HGNC:21652]	chr6	108041409	108165854	-1	q21	42.48	protein_coding	5325
0.0036851	0.129	125.33	52.38	0.417937	209199_s_at	MEF2C	ENSG00000081189	myocyte enhancer factor 2C [Source:HGNC Symbol;Acc:HGNC:6996]	chr5	88717117	88904257	-1	q14.3	36.05	protein_coding	11755
0.0008858	0.115	140.76	36.12	0.256607	207238_s_at	PTPRC	ENSG00000081237	protein tyrosine phosphatase receptor type C [Source:HGNC Symbol;Acc:HGNC:9666]	chr1	198638457	198757476	1	q31.3	34.25	protein_coding	9168
0.0021289	0.121	438.44	87.55	0.199685	212587_s_at	PTPRC	ENSG00000081237	protein tyrosine phosphatase receptor type C [Source:HGNC Symbol;Acc:HGNC:9666]	chr1	198638457	198757476	1	q31.3	34.25	protein_coding	9168
0.006373	0.144	172.25	48.34	0.280639	212588_at	PTPRC	ENSG00000081237	protein tyrosine phosphatase receptor type C [Source:HGNC Symbol;Acc:HGNC:9666]	chr1	198638457	198757476	1	q31.3	34.25	protein_coding	9168
0.000719	0.113	135.2	22.7	0.167899	227266_s_at	FYB1	ENSG00000082074	FYN binding protein 1 [Source:HGNC Symbol;Acc:HGNC:4036]	chr5	39105252	39274528	-1	p13.1	37.96	protein_coding	8823
0.0025847	0.122	90.34	40.71	0.450631	211794_at	FYB1	ENSG00000082074	FYN binding protein 1 [Source:HGNC Symbol;Acc:HGNC:4036]	chr5	39105252	39274528	-1	p13.1	37.96	protein_coding	8823
0.0027255	0.122	216.74	100.65	0.464381	211795_s_at	FYB1	ENSG00000082074	FYN binding protein 1 [Source:HGNC Symbol;Acc:HGNC:4036]	chr5	39105252	39274528	-1	p13.1	37.96	protein_coding	8823
0.0010162	0.115	186.05	98.82	0.531148	204352_at	TRAF5	ENSG00000082512	TNF receptor associated factor 5 [Source:HGNC Symbol;Acc:HGNC:12035]	chr1	211326615	211374946	1	q32.3	44.65	protein_coding	9022
0.0013712	0.115	41.41	24.04	0.580536	204062_s_at	ULK2	ENSG00000083290	unc-51 like autophagy activating kinase 2 [Source:HGNC Symbol;Acc:HGNC:13480]	chr17	19770829	19867936	-1	p11.2	41.45	protein_coding	9868
0.00826	0.152	78.38	45.93	0.585991	204063_s_at	ULK2	ENSG00000083290	unc-51 like autophagy activating kinase 2 [Source:HGNC Symbol;Acc:HGNC:13480]	chr17	19770829	19867936	-1	p11.2	41.45	protein_coding	9868
0.0048892	0.137	309.22	170.34	0.55087	225282_at	SMAP2	ENSG00000084070	small ArfGAP2 [Source:HGNC Symbol;Acc:HGNC:25082]	chr1	40344850	40423326	1	p34.2	41.95	protein_coding	3601
0.0054326	0.14	242.1	24.49	0.101157	205237_at	FCN1	ENSG00000085265	ficolin 1 [Source:HGNC Symbol;Acc:HGNC:3623]	chr9	134903232	134917912	-1	q34.3	50.34	protein_coding	7588
0.0007769	0.113	59.53	103.89	1.74517	223225_s_at	SEH1L	ENSG00000085415	SEH1 like nucleoporin [Source:HGNC Symbol;Acc:HGNC:30379]	chr18	12947133	12987536	1	p11.21	43.55	protein_coding	10481
0.0075525	0.15	715.19	486.67	0.680477	224800_at	WDFY1	ENSG00000085449	WD repeat and FYVE domain containing 1 [Source:HGNC Symbol;Acc:HGNC:20451]	chr2	223855716	223945357	-1	q36.1	42.71	protein_coding	5485
0.0071865	0.148	258.09	151.57	0.587276	223253_at	EPDR1	ENSG00000086289	ependymin related 1 [Source:HGNC Symbol;Acc:HGNC:17572]	chr7	37683843	37951936	1	p14.1	38.37	protein_coding	2780
0.0032905	0.126	227.52	153.89	0.67638	219374_s_at	ALG9	ENSG00000086848	ALG9 alpha-1,2-mannosyltransferase [Source:HGNC Symbol;Acc:HGNC:15672]	chr11	111782195	111871581	-1	q23.1	40.69	protein_coding	8070
0.0052542	0.138	192.48	103.94	0.540004	211833_s_at	BAX	ENSG00000087088	BCL2 associated X, apoptosis regulator [Source:HGNC Symbol;Acc:HGNC:959]	chr19	48954815	48961798	1	q13.33	53.57	protein_coding	2587
0.0089974	0.154	311.19	202.81	0.651724	223148_at	PIGS	ENSG00000087111	phosphatidylinositol glycan anchor biosynthesis class S [Source:HGNC Symbol;Acc:HGNC:14937]	chr17	28553383	28571794	-1	q11.2	47.26	protein_coding	5903
0.0015168	0.117	516.67	290.07	0.561422	208079_s_at	AURKA	ENSG00000087586	aurora kinase A [Source:HGNC Symbol;Acc:HGNC:11393]	chr20	56369389	56392337	-1	q13.2	42.93	protein_coding	2928
0.0049847	0.137	283.68	165.44	0.583192	204092_s_at	AURKA	ENSG00000087586	aurora kinase A [Source:HGNC Symbol;Acc:HGNC:11393]	chr20	56369389	56392337	-1	q13.2	42.93	protein_coding	2928
0.0088319	0.153	25.78	45.72	1.77347	215237_at	DOCK9	ENSG00000088387	dedicator of cytokinesis 9 [Source:HGNC Symbol;Acc:HGNC:14132]	chr13	98793429	99086625	-1	q32.3	41.78	protein_coding	14816
0.0061915	0.143	397.96	41.32	0.10383	219519_s_at	SIGLEC1	ENSG00000088827	sialic acid binding Ig like lectin 1 [Source:HGNC Symbol;Acc:HGNC:11127]	chr20	3686970	3712600	-1	p13	55.28	protein_coding	8126
0.0018765	0.121	318.49	171.93	0.539829	202095_s_at	BIRC5	ENSG00000089685	baculoviral IAP repeat containing 5 [Source:HGNC Symbol;Acc:HGNC:593]	chr17	78214186	78225636	1	q25.3	49.27	protein_coding	3815
0.006467	0.144	84.58	48.8	0.576969	202094_at	BIRC5	ENSG00000089685	baculoviral IAP repeat containing 5 [Source:HGNC Symbol;Acc:HGNC:593]	chr17	78214186	78225636	1	q25.3	49.27	protein_coding	3815
0.0050386	0.137	332.96	93.12	0.279673	216834_at	RGS1	ENSG00000090104	regulator of G protein signaling 1 [Source:HGNC Symbol;Acc:HGNC:9991]	chr1	192575763	192580024	1	q31.2	33.81	protein_coding	4074
0.0055247	0.14	128.75	53.07	0.412194	220034_at	IRAK3	ENSG00000090376	interleukin 1 receptor associated kinase 3 [Source:HGNC Symbol;Acc:HGNC:17020]	chr12	66189195	66254622	1	q14.3	39.98	protein_coding	9688
0.0011066	0.115	925.54	89.76	0.0969812	213975_s_at	LYZ	ENSG00000090382	lysozyme [Source:HGNC Symbol;Acc:HGNC:6740]	chr12	69348381	69354234	1	q15	36.54	protein_coding	1724
0.002077	0.121	83.84	13.31	0.158755	1555745_a_at	LYZ	ENSG00000090382	lysozyme [Source:HGNC Symbol;Acc:HGNC:6740]	chr12	69348381	69354234	1	q15	36.54	protein_coding	1724
0.0080733	0.152	2009.37	1426.71	0.710029	214730_s_at	GLG1	ENSG00000090863	golgi glycoprotein 1 [Source:HGNC Symbol;Acc:HGNC:4316]	chr16	74447427	74607144	-1	q23.1	42.38	protein_coding	14111
0.0089008	0.154	546.62	370.09	0.677052	212045_at	GLG1	ENSG00000090863	golgi glycoprotein 1 [Source:HGNC Symbol;Acc:HGNC:4316]	chr16	74447427	74607144	-1	q23.1	42.38	protein_coding	14111
0.0011192	0.115	382.52	707.39	1.84929	218984_at	PUS7	ENSG00000091127	pseudouridine synthase 7 [Source:HGNC Symbol;Acc:HGNC:26033]	chr7	105439661	105522271	-1	q22.3	43	protein_coding	4433
0.0061354	0.143	449.77	306.53	0.681526	1553101_a_at	ALKBH5	ENSG00000091542	alkB homolog 5, RNA demethylase [Source:HGNC Symbol;Acc:HGNC:25996]	chr17	18183078	18209954	1	p11.2	50.24	protein_coding	3601
0.0009983	0.115	860.65	318.84	0.370464	200762_at	DPYSL2	ENSG00000092964	dihydropyrimidinase like 2 [Source:HGNC Symbol;Acc:HGNC:3014]	chr8	26514031	26658178	1	p21.2	44.97	protein_coding	7296
0.0036663	0.129	1287.33	391.75	0.304312	219505_at	ADA2	ENSG00000093072	adenosine deaminase 2 [Source:HGNC Symbol;Acc:HGNC:1839]	chr22	17178790	17258235	-1	q11.1	48.88	protein_coding	8704
0.0013651	0.115	61.09	125.47	2.05385	232705_at	LRRFIP2	ENSG00000093167	LRR binding FLII interacting protein 2 [Source:HGNC Symbol;Acc:HGNC:6703]	chr3	37052626	37183689	-1	p22.2	38.6	protein_coding	10674
0.0013909	0.115	309.24	565.3	1.82803	218364_at	LRRFIP2	ENSG00000093167	LRR binding FLII interacting protein 2 [Source:HGNC Symbol;Acc:HGNC:6703]	chr3	37052626	37183689	-1	p22.2	38.6	protein_coding	10674
0.00352	0.128	106.49	224.82	2.11118	232704_s_at	LRRFIP2	ENSG00000093167	LRR binding FLII interacting protein 2 [Source:HGNC Symbol;Acc:HGNC:6703]	chr3	37052626	37183689	-1	p22.2	38.6	protein_coding	10674
0.0079697	0.151	201.33	386.72	1.92083	220610_s_at	LRRFIP2	ENSG00000093167	LRR binding FLII interacting protein 2 [Source:HGNC Symbol;Acc:HGNC:6703]	chr3	37052626	37183689	-1	p22.2	38.6	protein_coding	10674
0.0026426	0.122	22.46	35.41	1.57658	211819_s_at	SORBS1	ENSG00000095637	sorbin and SH3 domain containing 1 [Source:HGNC Symbol;Acc:HGNC:14565]	chr10	95311771	95561414	-1	q24.1	44.47	protein_coding	10951
0.0070977	0.147	22.04	35.24	1.59891	218087_s_at	SORBS1	ENSG00000095637	sorbin and SH3 domain containing 1 [Source:HGNC Symbol;Acc:HGNC:14565]	chr10	95311771	95561414	-1	q24.1	44.47	protein_coding	10951
0.0079158	0.151	126.79	1091.4	8.60793	206924_at	IL11	ENSG00000095752	interleukin 11 [Source:HGNC Symbol;Acc:HGNC:5966]	chr19	55364382	55370463	-1	q13.42	60.84	protein_coding	2678
0.0014173	0.115	44.32	68.79	1.55212	1560485_at	HIVEP1	ENSG00000095951	HIVEP zinc finger 1 [Source:HGNC Symbol;Acc:HGNC:4920]	chr6	12008762	12164999	1	p24.1	39.37	protein_coding	11005
0.0063572	0.144	591.33	97.26	0.164477	219725_at	TREM2	ENSG00000095970	triggering receptor expressed on myeloid cells 2 [Source:HGNC Symbol;Acc:HGNC:17761]	chr6	41158506	41163186	-1	p21.1	54.22	protein_coding	1095
0.0031372	0.126	568.3	955.38	1.68112	202200_s_at	SRPK1	ENSG00000096063	SRSF protein kinase 1 [Source:HGNC Symbol;Acc:HGNC:11305]	chr6	35832966	35921342	-1	p21.31	40.48	protein_coding	6692
0.0099288	0.158	72.69	30.84	0.424267	1552584_at	IL12RB1	ENSG00000096996	interleukin 12 receptor subunit beta 1 [Source:HGNC Symbol;Acc:HGNC:5971]	chr19	18058995	18098944	-1	p13.11	51.1	protein_coding	4291
0.0041535	0.132	123.99	57.16	0.461005	212298_at	NRP1	ENSG00000099250	neuropilin 1 [Source:HGNC Symbol;Acc:HGNC:8004]	chr10	33177492	33336262	-1	p11.22	41.34	protein_coding	11522
0.0063141	0.143	2248.61	1168.84	0.519806	200810_s_at	CIRBP	ENSG00000099622	cold inducible RNA binding protein [Source:HGNC Symbol;Acc:HGNC:1982]	chr19	1259384	1274880	1	p13.3	62.55	protein_coding	6368
0.0029281	0.124	3298.61	1877.21	0.569091	207574_s_at	GADD45B	ENSG00000099860	growth arrest and DNA damage inducible beta [Source:HGNC Symbol;Acc:HGNC:4096]	chr19	2476122	2478259	1	p13.3	60.24	protein_coding	2138
0.0036557	0.129	267.84	172.96	0.645759	217955_at	BCL2L13	ENSG00000099968	BCL2 like 13 [Source:HGNC Symbol;Acc:HGNC:17164]	chr22	17628855	17730855	1	q11.21	42.8	protein_coding	7662
0.0064471	0.144	52.9	34.61	0.654253	228771_at	GRK3	ENSG00000100077	G protein-coupled receptor kinase 3 [Source:HGNC Symbol;Acc:HGNC:290]	chr22	25564675	25729294	1	q12.1	40.6	protein_coding	9477
0.0088068	0.153	108.48	74.49	0.68667	204184_s_at	GRK3	ENSG00000100077	G protein-coupled receptor kinase 3 [Source:HGNC Symbol;Acc:HGNC:290]	chr22	25564675	25729294	1	q12.1	40.6	protein_coding	9477
0.0071125	0.147	10558.4	5230.89	0.495426	201105_at	LGALS1	ENSG00000100097	galectin 1 [Source:HGNC Symbol;Acc:HGNC:6561]	chr22	37675636	37679802	1	q13.1	56.68	protein_coding	1067
0.0099818	0.158	397.85	153.46	0.385723	204017_at	KDELR3	ENSG00000100196	KDEL endoplasmic reticulum protein retention receptor 3 [Source:HGNC Symbol;Acc:HGNC:6306]	chr22	38468078	38483447	1	q13.1	49.55	protein_coding	1913
0.003884	0.13	433.57	269.56	0.621722	204193_at	CHKB	ENSG00000100288	choline kinase beta [Source:HGNC Symbol;Acc:HGNC:1938]	chr22	50578959	50601455	-1	q13.33	50.64	protein_coding	2866
0.0009315	0.115	3073.77	746.98	0.243018	203665_at	HMOX1	ENSG00000100292	heme oxygenase 1 [Source:HGNC Symbol;Acc:HGNC:5013]	chr22	35380361	35394214	1	q12.3	51.11	protein_coding	2306
0.001536	0.117	201.55	110.61	0.548797	204443_at	ARSA	ENSG00000100299	arylsulfatase A [Source:HGNC Symbol;Acc:HGNC:713]	chr22	50622754	50628173	-1	q13.33	61.2	protein_coding	4501
0.0095195	0.157	2592.92	1438.54	0.554795	202096_s_at	TSPO	ENSG00000100300	translocator protein [Source:HGNC Symbol;Acc:HGNC:1158]	chr22	43151547	43163242	1	q13.2	57.74	protein_coding	1422
0.006555	0.145	69.2	31.78	0.459249	210321_at	GZMH	ENSG00000100450	granzyme H [Source:HGNC Symbol;Acc:HGNC:4710]	chr14	24606480	24609699	-1	q12	52.14	protein_coding	951
0.0087557	0.153	176.57	92.39	0.523249	225926_at	VTI1B	ENSG00000100568	vesicle transport through interaction with t-SNAREs 1B [Source:HGNC Symbol;Acc:HGNC:17793]	chr14	67647085	67674820	-1	q24.1	42.96	protein_coding	5768
0.000763	0.113	311.49	118.2	0.379466	60471_at	RIN3	ENSG00000100599	Ras and Rab interactor 3 [Source:HGNC Symbol;Acc:HGNC:18751]	chr14	92513781	92688994	1	q32.12	49.34	protein_coding	8676
0.0015181	0.117	158.26	75.72	0.478453	219457_s_at	RIN3	ENSG00000100599	Ras and Rab interactor 3 [Source:HGNC Symbol;Acc:HGNC:18751]	chr14	92513781	92688994	1	q32.12	49.34	protein_coding	8676
0.0085923	0.153	1345.01	513.4	0.381707	201212_at	LGMN	ENSG00000100600	legumain [Source:HGNC Symbol;Acc:HGNC:9472]	chr14	92703807	92748679	-1	q32.12	47.28	protein_coding	3876
2.91e-05	0.0772	167.51	566.36	3.38105	229796_at	SIX4	ENSG00000100625	SIX homeobox 4 [Source:HGNC Symbol;Acc:HGNC:10890]	chr14	60709539	60724351	-1	q23.1	44.08	protein_coding	6771
0.0037386	0.129	11.71	17.03	1.45431	231797_at	SIX4	ENSG00000100625	SIX homeobox 4 [Source:HGNC Symbol;Acc:HGNC:10890]	chr14	60709539	60724351	-1	q23.1	44.08	protein_coding	6771
0.0072752	0.148	3675.4	2598.56	0.707014	212266_s_at	SRSF5	ENSG00000100650	serine and arginine rich splicing factor 5 [Source:HGNC Symbol;Acc:HGNC:10787]	chr14	69726900	69772005	1	q24.1	43.68	protein_coding	5357
0.00578	0.141	117.82	77.49	0.657698	218267_at	CINP	ENSG00000100865	cyclin dependent kinase 2 interacting protein [Source:HGNC Symbol;Acc:HGNC:23789]	chr14	102341102	102362916	-1	q32.31	46.49	protein_coding	5344
0.0039234	0.13	659.08	1015.49	1.54077	1567214_a_at	PNN	ENSG00000100941	pinin, desmosome associated protein [Source:HGNC Symbol;Acc:HGNC:9162]	chr14	39175183	39183220	1	q21.1	40.64	protein_coding	4203
0.0052924	0.138	1283.41	1953.7	1.52227	212036_s_at	PNN	ENSG00000100941	pinin, desmosome associated protein [Source:HGNC Symbol;Acc:HGNC:9162]	chr14	39175183	39183220	1	q21.1	40.64	protein_coding	4203
0.0057381	0.141	91.81	193.09	2.10315	222292_at	CD40	ENSG00000101017	CD40 molecule [Source:HGNC Symbol;Acc:HGNC:11919]	chr20	46118278	46129863	1	q13.12	49.19	protein_coding	2521
0.0085819	0.153	1003.34	293.22	0.292244	210042_s_at	CTSZ	ENSG00000101160	cathepsin Z [Source:HGNC Symbol;Acc:HGNC:2547]	chr20	58985686	59008238	-1	q13.32	53.07	protein_coding	19384
0.0003031	0.1	283.61	505.27	1.78157	213213_at	DIDO1	ENSG00000101191	death inducer-obliterator 1 [Source:HGNC Symbol;Acc:HGNC:2680]	chr20	62877738	62937952	-1	q13.33	49.19	protein_coding	13283
0.0065804	0.145	146.63	228.89	1.561	227335_at	DIDO1	ENSG00000101191	death inducer-obliterator 1 [Source:HGNC Symbol;Acc:HGNC:2680]	chr20	62877738	62937952	-1	q13.33	49.19	protein_coding	13283
0.0096553	0.157	878.97	534.62	0.608235	201853_s_at	CDC25B	ENSG00000101224	cell division cycle 25B [Source:HGNC Symbol;Acc:HGNC:1726]	chr20	3786772	3806121	1	p13	53.03	protein_coding	3903
0.0047423	0.136	131.66	57.56	0.437187	203185_at	RASSF2	ENSG00000101265	Ras association domain family member 2 [Source:HGNC Symbol;Acc:HGNC:9883]	chr20	4780023	4823608	-1	p13	49.01	protein_coding	5722
0.00553	0.14	26.79	41.92	1.56476	233630_at	CDS2	ENSG00000101290	CDP-diacylglycerol synthase 2 [Source:HGNC Symbol;Acc:HGNC:1801]	chr20	5126879	5197887	1	p12.3	44.8	protein_coding	11800
0.0003635	0.104	365.96	190.88	0.521587	225687_at	FAM83D	ENSG00000101447	family with sequence similarity 83 member D [Source:HGNC Symbol;Acc:HGNC:16122]	chr20	38926312	38953106	1	q11.23	46.5	protein_coding	2475
3.8e-06	0.0734	23.38	134.91	5.77032	219181_at	LIPG	ENSG00000101670	lipase G, endothelial type [Source:HGNC Symbol;Acc:HGNC:6623]	chr18	49560699	49599185	1	q21.1	47.91	protein_coding	13089
0.005394	0.14	62.21	12.61	0.202701	229560_at	TLR8	ENSG00000101916	toll like receptor 8 [Source:HGNC Symbol;Acc:HGNC:15632]	chrX	12906620	12923169	1	p22.2	41.32	protein_coding	4353
0.006692	0.146	149.19	92.85	0.622361	205142_x_at	ABCD1	ENSG00000101986	ATP binding cassette subfamily D member 1 [Source:HGNC Symbol;Acc:HGNC:61]	chrX	153724856	153744755	1	q28	58.35	protein_coding	4238
0.0029198	0.124	14797	8221.59	0.555627	201666_at	TIMP1	ENSG00000102265	TIMP metallopeptidase inhibitor 1 [Source:HGNC Symbol;Acc:HGNC:11820]	chrX	47582408	47586789	1	p11.3	53.47	protein_coding	1446
0.0077436	0.151	1214.08	3217.04	2.64978	209212_s_at	KLF5	ENSG00000102554	Kruppel like factor 5 [Source:HGNC Symbol;Acc:HGNC:6349]	chr13	73054976	73077541	1	q22.1	38.99	protein_coding	3679
0.0040468	0.131	465.2	191.31	0.411242	204638_at	ACP5	ENSG00000102575	acid phosphatase 5, tartrate resistant [Source:HGNC Symbol;Acc:HGNC:124]	chr19	11574660	11579008	-1	p13.2	58.59	protein_coding	2919
0.0031274	0.126	39.04	72.64	1.86066	222239_s_at	INTS6	ENSG00000102786	integrator complex subunit 6 [Source:HGNC Symbol;Acc:HGNC:14879]	chr13	51354077	51454264	-1	q14.3	36.13	protein_coding	25509
0.0039296	0.13	385.41	681.97	1.76947	218819_at	INTS6	ENSG00000102786	integrator complex subunit 6 [Source:HGNC Symbol;Acc:HGNC:14879]	chr13	51354077	51454264	-1	q14.3	36.13	protein_coding	25509
0.006956	0.147	582.6	253.23	0.434655	209083_at	CORO1A	ENSG00000102879	coronin 1A [Source:HGNC Symbol;Acc:HGNC:2252]	chr16	30182827	30189076	1	p11.2	64.42	protein_coding	4779
0.005076	0.137	308.59	215.68	0.698921	202738_s_at	PHKB	ENSG00000102893	phosphorylase kinase regulatory subunit beta [Source:HGNC Symbol;Acc:HGNC:8927]	chr16	47461123	47701523	1	q12.1	38.19	protein_coding	11822
0.0001572	0.0851	563.43	1208.36	2.14465	224984_at	NFAT5	ENSG00000102908	nuclear factor of activated T cells 5 [Source:HGNC Symbol;Acc:HGNC:7774]	chr16	69565094	69704666	1	q22.1	38.64	protein_coding	16401
0.0076065	0.15	164.4	310.43	1.88826	215092_s_at	NFAT5	ENSG00000102908	nuclear factor of activated T cells 5 [Source:HGNC Symbol;Acc:HGNC:7774]	chr16	69565094	69704666	1	q22.1	38.64	protein_coding	16401
0.0032358	0.126	58.34	105.86	1.81454	219751_at	SETD6	ENSG00000103037	SET domain containing 6, protein lysine methyltransferase [Source:HGNC Symbol;Acc:HGNC:26116]	chr16	58515479	58523842	1	q21	46.58	protein_coding	7739
0.0018272	0.121	222.24	94.93	0.427151	205090_s_at	NAGPA	ENSG00000103174	N-acetylglucosamine-1-phosphodiester alpha-N-acetylglucosaminidase [Source:HGNC Symbol;Acc:HGNC:17378]	chr16	5024844	5034141	-1	p13.3	56.14	protein_coding	5484
0.0011326	0.115	1859.62	3554.23	1.91127	215438_x_at	GSPT1	ENSG00000103342	G1 to S phase transition 1 [Source:HGNC Symbol;Acc:HGNC:4621]	chr16	11868128	11916082	-1	p13.13	42.29	protein_coding	8054
0.0027878	0.123	724.76	1233.04	1.70131	201912_s_at	GSPT1	ENSG00000103342	G1 to S phase transition 1 [Source:HGNC Symbol;Acc:HGNC:4621]	chr16	11868128	11916082	-1	p13.13	42.29	protein_coding	8054
0.0075893	0.15	319.24	204.46	0.640459	208914_at	GGA2	ENSG00000103365	golgi associated, gamma adaptin ear containing, ARF binding protein 2 [Source:HGNC Symbol;Acc:HGNC:16064]	chr16	23463542	23521995	-1	p12.2	47.76	protein_coding	8231
0.0024265	0.122	213.56	128.92	0.603671	239135_at	CPPED1	ENSG00000103381	calcineurin like phosphoesterase domain containing 1 [Source:HGNC Symbol;Acc:HGNC:25632]	chr16	12659799	12803887	-1	p13.12	44.39	protein_coding	6354
0.0033565	0.128	108.01	236.48	2.18943	227256_at	USP31	ENSG00000103404	ubiquitin specific peptidase 31 [Source:HGNC Symbol;Acc:HGNC:20060]	chr16	23061406	23149452	-1	p12.2	41.46	protein_coding	12199
0.0060189	0.143	15.07	22.39	1.48573	244441_at	USP31	ENSG00000103404	ubiquitin specific peptidase 31 [Source:HGNC Symbol;Acc:HGNC:20060]	chr16	23061406	23149452	-1	p12.2	41.46	protein_coding	12199
0.0079842	0.151	80.65	43.76	0.542591	243124_at	RRN3P2	ENSG00000103472	RRN3 pseudogene 2 [Source:HGNC Symbol;Acc:HGNC:37619]	chr16	29074976	29116718	1	p11.2	44.01	lncRNA	2271
0.002633	0.122	740.45	225.3	0.304274	221666_s_at	PYCARD	ENSG00000103490	PYD and CARD domain containing [Source:HGNC Symbol;Acc:HGNC:16608]	chr16	31201486	31203450	-1	p11.2	61.88	protein_coding	1660
0.0047764	0.136	326.99	222.83	0.681458	202030_at	BCKDK	ENSG00000103507	branched chain keto acid dehydrogenase kinase [Source:HGNC Symbol;Acc:HGNC:16902]	chr16	31106107	31112791	1	p11.2	57.82	protein_coding	3873
0.002723	0.122	368.72	208.51	0.565497	203173_s_at	VPS35L	ENSG00000103544	VPS35 endosomal protein sorting factor like [Source:HGNC Symbol;Acc:HGNC:24641]	chr16	19555240	19706793	1	p12.3	45.1	protein_coding	9767
0.0067084	0.146	31.41	10.11	0.321872	220416_at	ATP8B4	ENSG00000104043	ATPase phospholipid transporting 8B4 (putative) [Source:HGNC Symbol;Acc:HGNC:13536]	chr15	49858238	50182817	-1	q21.2	38.4	protein_coding	11062
0.0023076	0.122	255.35	65.72	0.257372	212820_at	DMXL2	ENSG00000104093	Dmx like 2 [Source:HGNC Symbol;Acc:HGNC:2938]	chr15	51447711	51622833	-1	q21.2	36.95	protein_coding	13807
0.00931	0.156	291.54	405.61	1.39127	220072_at	CSPP1	ENSG00000104218	centrosome and spindle pole associated protein 1 [Source:HGNC Symbol;Acc:HGNC:26193]	chr8	67062417	67196778	1	q13.1	38.01	protein_coding	31717
0.0065343	0.145	173.96	330.82	1.9017	209301_at	CA2	ENSG00000104267	carbonic anhydrase 2 [Source:HGNC Symbol;Acc:HGNC:1373]	chr8	85463968	85481493	1	q21.2	38.44	protein_coding	2007
0.0067044	0.146	68.96	117.17	1.6991	209544_at	RIPK2	ENSG00000104312	receptor interacting serine/threonine kinase 2 [Source:HGNC Symbol;Acc:HGNC:10020]	chr8	89757806	89791064	1	q21.3	35.92	protein_coding	3059
0.0083459	0.153	10.47	15.57	1.48711	211027_s_at	IKBKB	ENSG00000104365	inhibitor of nuclear factor kappa B kinase subunit beta [Source:HGNC Symbol;Acc:HGNC:5960]	chr8	42271302	42332460	1	p11.21	48.26	protein_coding	11048
0.0097066	0.157	145.92	327.86	2.24685	210117_at	SPAG1	ENSG00000104450	sperm associated antigen 1 [Source:HGNC Symbol;Acc:HGNC:11212]	chr8	100157906	100259278	1	q22.2	40.18	protein_coding	5056
0.0003713	0.104	567.2	1234.1	2.17578	209218_at	SQLE	ENSG00000104549	squalene epoxidase [Source:HGNC Symbol;Acc:HGNC:11279]	chr8	124998497	125022283	1	q24.13	37.59	protein_coding	4305
0.0012843	0.115	551.95	1090.68	1.97605	213577_at	SQLE	ENSG00000104549	squalene epoxidase [Source:HGNC Symbol;Acc:HGNC:11279]	chr8	124998497	125022283	1	q24.13	37.59	protein_coding	4305
0.0049198	0.137	690.55	467.5	0.676997	202594_at	LEPROTL1	ENSG00000104660	leptin receptor overlapping transcript like 1 [Source:HGNC Symbol;Acc:HGNC:6555]	chr8	30095408	30177208	1	p12	42.61	protein_coding	5411
0.0080344	0.151	490.55	329.5	0.671695	202595_s_at	LEPROTL1	ENSG00000104660	leptin receptor overlapping transcript like 1 [Source:HGNC Symbol;Acc:HGNC:6555]	chr8	30095408	30177208	1	p12	42.61	protein_coding	5411
0.0009403	0.115	144.81	365.6	2.52469	1552648_a_at	TNFRSF10A	ENSG00000104689	TNF receptor superfamily member 10a [Source:HGNC Symbol;Acc:HGNC:11904]	chr8	23190452	23225102	-1	p21.3	45.34	protein_coding	2927
0.0010023	0.115	97.75	240.81	2.46353	241371_at	TNFRSF10A	ENSG00000104689	TNF receptor superfamily member 10a [Source:HGNC Symbol;Acc:HGNC:11904]	chr8	23190452	23225102	-1	p21.3	45.34	protein_coding	2927
0.0027151	0.122	267.77	662.19	2.47298	231775_at	TNFRSF10A	ENSG00000104689	TNF receptor superfamily member 10a [Source:HGNC Symbol;Acc:HGNC:11904]	chr8	23190452	23225102	-1	p21.3	45.34	protein_coding	2927
0.0012499	0.115	1054.01	402	0.381401	1555419_a_at	ASAH1	ENSG00000104763	N-acylsphingosine amidohydrolase 1 [Source:HGNC Symbol;Acc:HGNC:735]	chr8	18055992	18084998	-1	p22	40.73	protein_coding	15378
0.0015966	0.117	458.07	222.24	0.485166	210980_s_at	ASAH1	ENSG00000104763	N-acylsphingosine amidohydrolase 1 [Source:HGNC Symbol;Acc:HGNC:735]	chr8	18055992	18084998	-1	p22	40.73	protein_coding	15378
0.0030486	0.125	1479.49	791.08	0.534698	213702_x_at	ASAH1	ENSG00000104763	N-acylsphingosine amidohydrolase 1 [Source:HGNC Symbol;Acc:HGNC:735]	chr8	18055992	18084998	-1	p22	40.73	protein_coding	15378
0.0001918	0.0851	1099.84	555.27	0.504864	221478_at	BNIP3L	ENSG00000104765	BCL2 interacting protein 3 like [Source:HGNC Symbol;Acc:HGNC:1085]	chr8	26383054	26505636	1	p21.2	43.6	protein_coding	4149
0.0005487	0.112	1470.39	891.73	0.606458	221479_s_at	BNIP3L	ENSG00000104765	BCL2 interacting protein 3 like [Source:HGNC Symbol;Acc:HGNC:1085]	chr8	26383054	26505636	1	p21.2	43.6	protein_coding	4149
0.0043748	0.134	54.77	15.36	0.280445	204192_at	CD37	ENSG00000104894	CD37 molecule [Source:HGNC Symbol;Acc:HGNC:1666]	chr19	49335171	49343335	1	q13.33	57.54	protein_coding	4161
0.009764	0.158	102.04	137.91	1.35153	218466_at	TBC1D17	ENSG00000104946	TBC1 domain family member 17 [Source:HGNC Symbol;Acc:HGNC:25699]	chr19	49877425	49888750	1	q13.33	57.5	protein_coding	4746
0.0055951	0.14	689.97	467.37	0.677377	217729_s_at	TLE5	ENSG00000104964	TLE family member 5, transcriptional modulator [Source:HGNC Symbol;Acc:HGNC:307]	chr19	3052910	3063107	-1	p13.3	60.37	protein_coding	5236
7.91e-05	0.0815	743.58	283.59	0.381385	201050_at	PLD3	ENSG00000105223	phospholipase D family member 3 [Source:HGNC Symbol;Acc:HGNC:17158]	chr19	40348456	40380439	1	q13.2	52.33	protein_coding	5186
9.02e-05	0.0815	134.35	44.2	0.328991	213915_at	NKG7	ENSG00000105374	natural killer cell granule protein 7 [Source:HGNC Symbol;Acc:HGNC:7830]	chr19	51371606	51372701	-1	q13.41	59.03	protein_coding	921
0.0083016	0.153	727.61	404.59	0.556053	202942_at	ETFB	ENSG00000105379	electron transfer flavoprotein subunit beta [Source:HGNC Symbol;Acc:HGNC:3482]	chr19	51345169	51366388	-1	q13.41	51.45	protein_coding	6496
0.0079888	0.151	1157.95	1653.7	1.42813	213097_s_at	DNAJC2	ENSG00000105821	DnaJ heat shock protein family (Hsp40) member C2 [Source:HGNC Symbol;Acc:HGNC:13192]	chr7	103312289	103344830	-1	q22.1	40.48	protein_coding	6706
0.0020848	0.121	80.77	310.75	3.84734	1563010_at	ITGB8	ENSG00000105855	integrin subunit beta 8 [Source:HGNC Symbol;Acc:HGNC:6163]	chr7	20330702	20415754	1	p21.1	37.44	protein_coding	15156
0.0037347	0.129	79.32	270.37	3.4086	242982_x_at	ITGB8	ENSG00000105855	integrin subunit beta 8 [Source:HGNC Symbol;Acc:HGNC:6163]	chr7	20330702	20415754	1	p21.1	37.44	protein_coding	15156
0.0072741	0.148	71.09	319.04	4.48783	205816_at	ITGB8	ENSG00000105855	integrin subunit beta 8 [Source:HGNC Symbol;Acc:HGNC:6163]	chr7	20330702	20415754	1	p21.1	37.44	protein_coding	15156
0.0069831	0.147	38.75	53.94	1.392	206663_at	SP4	ENSG00000105866	Sp4 transcription factor [Source:HGNC Symbol;Acc:HGNC:11209]	chr7	21428043	21514822	1	p15.3	38.35	protein_coding	6225
0.0029753	0.124	264.14	159.97	0.605626	212206_s_at	H2AZ2	ENSG00000105968	H2A.Z variant histone 2 [Source:HGNC Symbol;Acc:HGNC:20664]	chr7	44826791	44848087	-1	p13	41.42	protein_coding	7003
0.0014088	0.115	278.41	146.79	0.527244	228762_at	LFNG	ENSG00000106003	LFNG O-fucosylpeptide 3-beta-N-acetylglucosaminyltransferase [Source:HGNC Symbol;Acc:HGNC:6560]	chr7	2512529	2529177	1	p22.3	62.83	protein_coding	3486
1.72e-05	0.0772	366.72	53.83	0.146788	208146_s_at	CPVL	ENSG00000106066	carboxypeptidase vitellogenic like [Source:HGNC Symbol;Acc:HGNC:14399]	chr7	28995235	29195451	-1	p14.3	41	protein_coding	3336
0.0023387	0.122	120.5	248.74	2.06423	227247_at	PLEKHA8	ENSG00000106086	pleckstrin homology domain containing A8 [Source:HGNC Symbol;Acc:HGNC:30037]	chr7	30027404	30130483	1	p14.3	39.62	protein_coding	10886
0.0028218	0.123	32.39	10.58	0.326644	232024_at	GIMAP2	ENSG00000106560	GTPase, IMAP family member 2 [Source:HGNC Symbol;Acc:HGNC:21789]	chr7	150685697	150693641	1	q36.1	44.17	protein_coding	2097
0.0042442	0.132	720.46	170.6	0.236793	220532_s_at	TMEM176B	ENSG00000106565	transmembrane protein 176B [Source:HGNC Symbol;Acc:HGNC:29596]	chr7	150791285	150801360	-1	q36.1	51.68	protein_coding	1979
0.0027475	0.123	29.01	16.25	0.560152	233575_s_at	TLE4	ENSG00000106829	TLE family member 4, transcriptional corepressor [Source:HGNC Symbol;Acc:HGNC:11840]	chr9	79571773	79726882	1	q21.31	39.28	protein_coding	8187
0.0038926	0.13	99.13	25.98	0.26208	235735_at	TNFSF8	ENSG00000106952	TNF superfamily member 8 [Source:HGNC Symbol;Acc:HGNC:11938]	chr9	114893343	114930595	-1	q33.1	42.47	protein_coding	4605
0.0081969	0.152	28.35	16	0.564374	241819_at	TNFSF8	ENSG00000106952	TNF superfamily member 8 [Source:HGNC Symbol;Acc:HGNC:11938]	chr9	114893343	114930595	-1	q33.1	42.47	protein_coding	4605
0.003411	0.128	474.13	193.95	0.409065	201809_s_at	ENG	ENSG00000106991	endoglin [Source:HGNC Symbol;Acc:HGNC:3349]	chr9	127815013	127854658	-1	q34.11	53.14	protein_coding	3836
0.0030443	0.125	18.48	8.49	0.459416	232843_s_at	DOCK8	ENSG00000107099	dedicator of cytokinesis 8 [Source:HGNC Symbol;Acc:HGNC:19191]	chr9	214854	465259	1	p24.3	41.5	protein_coding	19768
0.0083715	0.153	47.01	15.75	0.335035	225502_at	DOCK8	ENSG00000107099	dedicator of cytokinesis 8 [Source:HGNC Symbol;Acc:HGNC:19191]	chr9	214854	465259	1	p24.3	41.5	protein_coding	19768
0.0084262	0.153	259.69	157.8	0.607648	203308_x_at	HPS1	ENSG00000107521	HPS1 biogenesis of lysosomal organelles complex 3 subunit 1 [Source:HGNC Symbol;Acc:HGNC:5163]	chr10	98416198	98446935	-1	q24.2	49.71	protein_coding	5285
0.0079274	0.151	191.08	46.54	0.243563	226436_at	RASSF4	ENSG00000107551	Ras association domain family member 4 [Source:HGNC Symbol;Acc:HGNC:20793]	chr10	44959407	44995891	1	q11.21	53.37	protein_coding	9481
0.0002651	0.0948	757.66	278.01	0.366932	225373_at	VSIR	ENSG00000107738	V-set immunoregulatory receptor [Source:HGNC Symbol;Acc:HGNC:30085]	chr10	71747556	71773520	-1	q22.1	53.86	protein_coding	5153
0.0052915	0.138	2834.4	438.73	0.154788	201847_at	LIPA	ENSG00000107798	lipase A, lysosomal acid type [Source:HGNC Symbol;Acc:HGNC:6617]	chr10	89213569	89414557	-1	q23.31	41.43	protein_coding	4891
0.0012856	0.115	307.2	108.92	0.354557	217226_s_at	SFXN3	ENSG00000107819	sideroflexin 3 [Source:HGNC Symbol;Acc:HGNC:16087]	chr10	101031234	101041244	1	q24.31	54.03	protein_coding	4631
0.0026466	0.122	535.13	199.22	0.372283	220974_x_at	SFXN3	ENSG00000107819	sideroflexin 3 [Source:HGNC Symbol;Acc:HGNC:16087]	chr10	101031234	101041244	1	q24.31	54.03	protein_coding	4631
0.0012228	0.115	118.46	208.11	1.7568	228196_s_at	LARP4B	ENSG00000107929	La ribonucleoprotein 4B [Source:HGNC Symbol;Acc:HGNC:28987]	chr10	806914	931705	-1	p15.3	42.7	protein_coding	11610
0.0037232	0.129	88.53	148.14	1.67333	240005_at	LARP4B	ENSG00000107929	La ribonucleoprotein 4B [Source:HGNC Symbol;Acc:HGNC:28987]	chr10	806914	931705	-1	p15.3	42.7	protein_coding	11610
0.0014451	0.115	584.02	1009.5	1.72854	218239_s_at	GTPBP4	ENSG00000107937	GTP binding protein 4 [Source:HGNC Symbol;Acc:HGNC:21535]	chr10	988434	1019932	1	p15.3	46.88	protein_coding	6121
0.0038955	0.13	372.29	621.21	1.66862	218238_at	GTPBP4	ENSG00000107937	GTP binding protein 4 [Source:HGNC Symbol;Acc:HGNC:21535]	chr10	988434	1019932	1	p15.3	46.88	protein_coding	6121
0.002103	0.121	175.61	281.21	1.60133	229676_at	MTPAP	ENSG00000107951	mitochondrial poly(A) polymerase [Source:HGNC Symbol;Acc:HGNC:25532]	chr10	30309801	30374448	-1	p11.23	43.36	protein_coding	8341
0.0095993	0.157	251.23	413.21	1.64475	222794_x_at	MTPAP	ENSG00000107951	mitochondrial poly(A) polymerase [Source:HGNC Symbol;Acc:HGNC:25532]	chr10	30309801	30374448	-1	p11.23	43.36	protein_coding	8341
0.0014228	0.115	376.75	752	1.99602	218331_s_at	TASOR2	ENSG00000108021	transcription activation suppressor family member 2 [Source:HGNC Symbol;Acc:HGNC:23484]	chr10	5684838	5763740	1	p15.1	38.83	protein_coding	10960
0.0043385	0.134	132.16	339.2	2.56659	244165_at	TASOR2	ENSG00000108021	transcription activation suppressor family member 2 [Source:HGNC Symbol;Acc:HGNC:23484]	chr10	5684838	5763740	1	p15.1	38.83	protein_coding	10960
0.0091399	0.155	90.82	259.77	2.86027	216211_at	TASOR2	ENSG00000108021	transcription activation suppressor family member 2 [Source:HGNC Symbol;Acc:HGNC:23484]	chr10	5684838	5763740	1	p15.1	38.83	protein_coding	10960
0.0010572	0.115	2551.09	1320.35	0.517563	212124_at	ZMIZ1	ENSG00000108175	zinc finger MIZ-type containing 1 [Source:HGNC Symbol;Acc:HGNC:16493]	chr10	79068966	79316519	1	q22.3	55.32	protein_coding	10804
0.0068172	0.147	336.84	582.89	1.73047	224939_at	NUFIP2	ENSG00000108256	nuclear FMR1 interacting protein 2 [Source:HGNC Symbol;Acc:HGNC:17634]	chr17	29255839	29294148	-1	q11.2	41.64	protein_coding	10877
0.0032625	0.126	73.73	44.14	0.598671	204683_at	ICAM2	ENSG00000108622	intercellular adhesion molecule 2 [Source:HGNC Symbol;Acc:HGNC:5345]	chr17	64002594	64020634	-1	q23.3	46.35	protein_coding	3243
0.0065292	0.145	574.67	369.63	0.643204	201140_s_at	RAB5C	ENSG00000108774	RAB5C, member RAS oncogene family [Source:HGNC Symbol;Acc:HGNC:9785]	chr17	42124978	42155044	-1	q21.2	49.38	protein_coding	2759
0.00184	0.121	181.65	102.54	0.564492	204360_s_at	NAGLU	ENSG00000108784	N-acetyl-alpha-glucosaminidase [Source:HGNC Symbol;Acc:HGNC:7632]	chr17	42536241	42544449	1	q21.2	56.84	protein_coding	2935
0.0096415	0.157	152.45	87.31	0.572712	228595_at	HSD17B1	ENSG00000108786	hydroxysteroid 17-beta dehydrogenase 1 [Source:HGNC Symbol;Acc:HGNC:5210]	chr17	42552922	42555214	1	q21.2	64.81	protein_coding	1951
0.005206	0.138	1230.12	547.47	0.445054	208626_s_at	VAT1	ENSG00000108828	vesicle amine transport 1 [Source:HGNC Symbol;Acc:HGNC:16919]	chr17	43014607	43025123	-1	q21.31	54.69	protein_coding	3466
0.0037688	0.129	1186.21	2062.17	1.73845	220044_x_at	LUC7L3	ENSG00000108848	LUC7 like 3 pre-mRNA splicing factor [Source:HGNC Symbol;Acc:HGNC:24309]	chr17	50719565	50756219	1	q21.33	39.65	protein_coding	8136
0.0051874	0.138	674.65	1208.03	1.7906	203804_s_at	LUC7L3	ENSG00000108848	LUC7 like 3 pre-mRNA splicing factor [Source:HGNC Symbol;Acc:HGNC:24309]	chr17	50719565	50756219	1	q21.33	39.65	protein_coding	8136
0.0053291	0.139	2335.96	3889.82	1.66519	208835_s_at	LUC7L3	ENSG00000108848	LUC7 like 3 pre-mRNA splicing factor [Source:HGNC Symbol;Acc:HGNC:24309]	chr17	50719565	50756219	1	q21.33	39.65	protein_coding	8136
0.0048369	0.136	323.77	155.53	0.480372	226804_at	FAM20A	ENSG00000108950	FAM20A golgi associated secretory pathway pseudokinase [Source:HGNC Symbol;Acc:HGNC:23015]	chr17	68535113	68601367	-1	q24.2	44.82	protein_coding	6181
0.0098638	0.158	247.28	102.35	0.413903	242945_at	FAM20A	ENSG00000108950	FAM20A golgi associated secretory pathway pseudokinase [Source:HGNC Symbol;Acc:HGNC:23015]	chr17	68535113	68601367	-1	q24.2	44.82	protein_coding	6181
0.0054555	0.14	844.88	386.43	0.457379	210139_s_at	PMP22	ENSG00000109099	peripheral myelin protein 22 [Source:HGNC Symbol;Acc:HGNC:9118]	chr17	15229773	15272292	-1	p12	45.45	protein_coding	10398
0.0001105	0.0837	309.47	1281.39	4.1406	205239_at	AREG	ENSG00000109321	amphiregulin [Source:HGNC Symbol;Acc:HGNC:651]	chr4	74445136	74455005	1	q13.3	36.88	protein_coding	1642
0.00467	0.135	376.61	202.61	0.537984	203778_at	MANBA	ENSG00000109323	mannosidase beta [Source:HGNC Symbol;Acc:HGNC:6831]	chr4	102630770	102760994	-1	q24	39.25	protein_coding	11743
0.0084026	0.153	118.54	42.67	0.359963	205715_at	BST1	ENSG00000109743	bone marrow stromal cell antigen 1 [Source:HGNC Symbol;Acc:HGNC:1118]	chr4	15703065	15738313	1	p15.32	43.46	protein_coding	2865
0.0024024	0.122	76.22	47.53	0.62359	218663_at	NCAPG	ENSG00000109805	non-SMC condensin I complex subunit G [Source:HGNC Symbol;Acc:HGNC:24304]	chr4	17810979	17844865	1	p15.31	35.36	protein_coding	4847
0.005955	0.142	184.5	126.08	0.68336	218662_s_at	NCAPG	ENSG00000109805	non-SMC condensin I complex subunit G [Source:HGNC Symbol;Acc:HGNC:24304]	chr4	17810979	17844865	1	p15.31	35.36	protein_coding	4847
0.002425	0.122	976.41	374.23	0.383271	201487_at	CTSC	ENSG00000109861	cathepsin C [Source:HGNC Symbol;Acc:HGNC:2528]	chr11	88265069	88359684	-1	q14.2	37.69	protein_coding	24849
0.0088944	0.154	423.06	139.85	0.330568	225647_s_at	CTSC	ENSG00000109861	cathepsin C [Source:HGNC Symbol;Acc:HGNC:2528]	chr11	88265069	88359684	-1	q14.2	37.69	protein_coding	24849
0.0095184	0.157	520.28	189.22	0.363689	225646_at	CTSC	ENSG00000109861	cathepsin C [Source:HGNC Symbol;Acc:HGNC:2528]	chr11	88265069	88359684	-1	q14.2	37.69	protein_coding	24849
0.0027988	0.123	492.15	932.85	1.89546	212232_at	FNBP4	ENSG00000109920	formin binding protein 4 [Source:HGNC Symbol;Acc:HGNC:19752]	chr11	47716494	47767443	-1	p11.2	43.42	protein_coding	7619
0.008411	0.153	129.53	267.22	2.063	229272_at	FNBP4	ENSG00000109920	formin binding protein 4 [Source:HGNC Symbol;Acc:HGNC:19752]	chr11	47716494	47767443	-1	p11.2	43.42	protein_coding	7619
0.0051192	0.137	550.59	980.72	1.78122	211423_s_at	SC5D	ENSG00000109929	sterol-C5-desaturase [Source:HGNC Symbol;Acc:HGNC:10547]	chr11	121292681	121313410	1	q23.3	38.3	protein_coding	10054
0.0008448	0.114	1253.19	76.08	0.0607091	224356_x_at	MS4A6A	ENSG00000110077	membrane spanning 4-domains A6A [Source:HGNC Symbol;Acc:HGNC:13375]	chr11	60172015	60184666	-1	q12.2	40.18	protein_coding	5547
0.0024301	0.122	1241.25	97.87	0.0788479	223280_x_at	MS4A6A	ENSG00000110077	membrane spanning 4-domains A6A [Source:HGNC Symbol;Acc:HGNC:13375]	chr11	60172015	60184666	-1	q12.2	40.18	protein_coding	5547
0.0058833	0.141	418.07	46.03	0.110101	219666_at	MS4A6A	ENSG00000110077	membrane spanning 4-domains A6A [Source:HGNC Symbol;Acc:HGNC:13375]	chr11	60172015	60184666	-1	q12.2	40.18	protein_coding	5547
0.0090681	0.155	54.76	8.08	0.147553	230550_at	MS4A6A	ENSG00000110077	membrane spanning 4-domains A6A [Source:HGNC Symbol;Acc:HGNC:13375]	chr11	60172015	60184666	-1	q12.2	40.18	protein_coding	5547
0.0037731	0.129	529.13	27.8	0.0525391	219607_s_at	MS4A4A	ENSG00000110079	membrane spanning 4-domains A4A [Source:HGNC Symbol;Acc:HGNC:13371]	chr11	60185657	60318080	1	q12.2	38.48	protein_coding	6501
0.0070903	0.147	285.77	27.47	0.0961263	1555728_a_at	MS4A4A	ENSG00000110079	membrane spanning 4-domains A4A [Source:HGNC Symbol;Acc:HGNC:13371]	chr11	60185657	60318080	1	q12.2	38.48	protein_coding	6501
0.0007341	0.113	332.38	168.78	0.507792	226106_at	RNF141	ENSG00000110315	ring finger protein 141 [Source:HGNC Symbol;Acc:HGNC:21159]	chr11	10511673	10541230	-1	p15.4	36.1	protein_coding	7825
0.0026514	0.122	109.7	51.42	0.468733	219104_at	RNF141	ENSG00000110315	ring finger protein 141 [Source:HGNC Symbol;Acc:HGNC:21159]	chr11	10511673	10541230	-1	p15.4	36.1	protein_coding	7825
0.0061967	0.143	448.81	101.55	0.226265	204912_at	IL10RA	ENSG00000110324	interleukin 10 receptor subunit alpha [Source:HGNC Symbol;Acc:HGNC:5964]	chr11	117986370	118003037	1	q23.3	49.19	protein_coding	8080
0.0056884	0.141	304.72	537.56	1.76411	225231_at	CBL	ENSG00000110395	Cbl proto-oncogene [Source:HGNC Symbol;Acc:HGNC:1541]	chr11	119206298	119313926	1	q23.3	42.19	protein_coding	11718
0.0094435	0.156	460.32	256.46	0.557134	218072_at	COMMD9	ENSG00000110442	COMM domain containing 9 [Source:HGNC Symbol;Acc:HGNC:25014]	chr11	36269284	36289449	-1	p13	42.17	protein_coding	6592
0.0037049	0.129	313	193.28	0.617508	228264_at	ACCS	ENSG00000110455	1-aminocyclopropane-1-carboxylate synthase homolog (inactive) [Source:HGNC Symbol;Acc:HGNC:23989]	chr11	44065925	44084237	1	p11.2	49.01	protein_coding	5841
0.0015952	0.117	776.01	308.76	0.397881	204158_s_at	TCIRG1	ENSG00000110719	T cell immune regulator 1, ATPase H+ transporting V0 subunit a3 [Source:HGNC Symbol;Acc:HGNC:11647]	chr11	68039025	68050895	1	q13.2	63.64	protein_coding	4375
0.0037539	0.129	25.47	50.73	1.99176	237106_at	SLC11A2	ENSG00000110911	solute carrier family 11 member 2 [Source:HGNC Symbol;Acc:HGNC:10908]	chr12	50979401	51028566	-1	q13.12	43.54	protein_coding	9888
0.0058331	0.141	430.77	899.14	2.08729	203123_s_at	SLC11A2	ENSG00000110911	solute carrier family 11 member 2 [Source:HGNC Symbol;Acc:HGNC:10908]	chr12	50979401	51028566	-1	q13.12	43.54	protein_coding	9888
0.0072634	0.148	512.58	1020.14	1.99021	203124_s_at	SLC11A2	ENSG00000110911	solute carrier family 11 member 2 [Source:HGNC Symbol;Acc:HGNC:10908]	chr12	50979401	51028566	-1	q13.12	43.54	protein_coding	9888
0.0095995	0.157	94.18	218.79	2.3231	220054_at	IL23A	ENSG00000110944	interleukin 23 subunit alpha [Source:HGNC Symbol;Acc:HGNC:15488]	chr12	56334174	56340410	1	q13.3	49.11	protein_coding	1178
0.0003779	0.104	317.38	681.85	2.14837	221773_at	ELK3	ENSG00000111145	ETS transcription factor ELK3 [Source:HGNC Symbol;Acc:HGNC:3325]	chr12	96194375	96269824	1	q23.1	45.12	protein_coding	4644
0.0022376	0.122	43.56	26.93	0.618228	229138_at	PARP11	ENSG00000111224	poly(ADP-ribose) polymerase family member 11 [Source:HGNC Symbol;Acc:HGNC:1186]	chr12	3791047	3873448	-1	p13.32	39.15	protein_coding	6200
0.0020143	0.121	244.02	127.29	0.521638	203320_at	SH2B3	ENSG00000111252	SH2B adaptor protein 3 [Source:HGNC Symbol;Acc:HGNC:29605]	chr12	111405923	111451623	1	q24.12	54.03	protein_coding	5707
0.0015951	0.117	397.92	864.05	2.17142	224832_at	DUSP16	ENSG00000111266	dual specificity phosphatase 16 [Source:HGNC Symbol;Acc:HGNC:17909]	chr12	12473282	12562863	-1	p13.2	40.41	protein_coding	7132
0.0003013	0.1	192.89	83.65	0.433667	201990_s_at	CREBL2	ENSG00000111269	cAMP responsive element binding protein like 2 [Source:HGNC Symbol;Acc:HGNC:2350]	chr12	12611827	12645108	1	p13.1	40.66	protein_coding	3922
0.0006216	0.113	113.79	62.49	0.54917	201988_s_at	CREBL2	ENSG00000111269	cAMP responsive element binding protein like 2 [Source:HGNC Symbol;Acc:HGNC:2350]	chr12	12611827	12645108	1	p13.1	40.66	protein_coding	3922
0.0011075	0.115	876.63	477.63	0.544848	201989_s_at	CREBL2	ENSG00000111269	cAMP responsive element binding protein like 2 [Source:HGNC Symbol;Acc:HGNC:2350]	chr12	12611827	12645108	1	p13.1	40.66	protein_coding	3922
0.0001041	0.0837	1236.5	298.68	0.241553	201288_at	ARHGDIB	ENSG00000111348	Rho GDP dissociation inhibitor beta [Source:HGNC Symbol;Acc:HGNC:679]	chr12	14942031	14961728	-1	p12.3	41.11	protein_coding	2042
0.0001153	0.0848	365.2	90.65	0.24822	1555812_a_at	ARHGDIB	ENSG00000111348	Rho GDP dissociation inhibitor beta [Source:HGNC Symbol;Acc:HGNC:679]	chr12	14942031	14961728	-1	p12.3	41.11	protein_coding	2042
0.0031064	0.126	105.28	33.68	0.319909	210354_at	IFNG	ENSG00000111537	interferon gamma [Source:HGNC Symbol;Acc:HGNC:5438]	chr12	68154768	68159740	-1	q15	35.99	protein_coding	1211
0.0009595	0.115	436.42	800.34	1.83388	214427_at	NOP2	ENSG00000111641	NOP2 nucleolar protein [Source:HGNC Symbol;Acc:HGNC:7867]	chr12	6556863	6568691	-1	p13.31	49.45	protein_coding	4687
0.0044484	0.134	103.96	33.47	0.321951	221724_s_at	CLEC4A	ENSG00000111729	C-type lectin domain family 4 member A [Source:HGNC Symbol;Acc:HGNC:13257]	chr12	8123617	8138607	1	p13.31	41.2	protein_coding	1296
0.0045799	0.135	67.71	24.56	0.362723	219947_at	CLEC4A	ENSG00000111729	C-type lectin domain family 4 member A [Source:HGNC Symbol;Acc:HGNC:13257]	chr12	8123617	8138607	1	p13.31	41.2	protein_coding	1296
0.004574	0.135	125.88	41.35	0.328487	214470_at	KLRB1	ENSG00000111796	killer cell lectin like receptor B1 [Source:HGNC Symbol;Acc:HGNC:6373]	chr12	9594551	9607916	-1	p13.31	36.75	protein_coding	1478
0.0071508	0.147	58.99	38.15	0.64672	38241_at	BTN3A3	ENSG00000111801	butyrophilin subfamily 3 member A3 [Source:HGNC Symbol;Acc:HGNC:1140]	chr6	26440472	26453415	1	p22.2	44.07	protein_coding	5658
0.0003788	0.104	849	503.96	0.593592	204820_s_at	BTN3A3	ENSG00000111801	butyrophilin subfamily 3 member A3 [Source:HGNC Symbol;Acc:HGNC:1140]	chr6	26440472	26453415	1	p22.2	44.07	protein_coding	5658
0.0021362	0.121	85.49	42.22	0.493859	203427_at	ASF1A	ENSG00000111875	anti-silencing function 1A histone chaperone [Source:HGNC Symbol;Acc:HGNC:20995]	chr6	118894152	118909171	1	q22.31	39.18	protein_coding	2589
0.0054833	0.14	478.1	274.55	0.574252	208673_s_at	SRSF3	ENSG00000112081	serine and arginine rich splicing factor 3 [Source:HGNC Symbol;Acc:HGNC:10785]	chr6	36594353	36605600	1	p21.31	40.22	protein_coding	7118
0.0005889	0.113	234.79	97.99	0.417352	226397_s_at	PHACTR1	ENSG00000112137	phosphatase and actin regulator 1 [Source:HGNC Symbol;Acc:HGNC:20990]	chr6	12716554	13287843	1	p24.1	41.18	protein_coding	11621
0.001104	0.115	152.75	61.85	0.40491	213638_at	PHACTR1	ENSG00000112137	phosphatase and actin regulator 1 [Source:HGNC Symbol;Acc:HGNC:20990]	chr6	12716554	13287843	1	p24.1	41.18	protein_coding	11621
0.0028968	0.124	146.19	53.25	0.364252	232045_at	PHACTR1	ENSG00000112137	phosphatase and actin regulator 1 [Source:HGNC Symbol;Acc:HGNC:20990]	chr6	12716554	13287843	1	p24.1	41.18	protein_coding	11621
0.0004332	0.105	1290.18	602.11	0.466687	204440_at	CD83	ENSG00000112149	CD83 molecule [Source:HGNC Symbol;Acc:HGNC:1703]	chr6	14117256	14136918	1	p23	45.18	protein_coding	2384
0.0057877	0.141	139.56	252.01	1.80575	1558549_s_at	VNN1	ENSG00000112299	vanin 1 [Source:HGNC Symbol;Acc:HGNC:12705]	chr6	132680849	132714055	-1	q23.2	38.11	protein_coding	3853
0.0076869	0.15	93.48	220.01	2.35355	205844_at	VNN1	ENSG00000112299	vanin 1 [Source:HGNC Symbol;Acc:HGNC:12705]	chr6	132680849	132714055	-1	q23.2	38.11	protein_coding	3853
0.0090472	0.154	334.55	622.65	1.86116	203612_at	BYSL	ENSG00000112578	bystin like [Source:HGNC Symbol;Acc:HGNC:1157]	chr6	41921499	41933046	1	p21.1	48.48	protein_coding	1937
0.0065286	0.145	18.83	27.15	1.44185	230357_at	GMDS	ENSG00000112699	GDP-mannose 4,6-dehydratase [Source:HGNC Symbol;Acc:HGNC:4369]	chr6	1623806	2245605	-1	p25.3	40.77	protein_coding	4217
0.0040521	0.131	521.22	67.75	0.129984	205859_at	LY86	ENSG00000112799	lymphocyte antigen 86 [Source:HGNC Symbol;Acc:HGNC:16837]	chr6	6588108	6654983	1	p25.1	44.39	protein_coding	1203
0.0090147	0.154	132.31	241.27	1.82352	219531_at	CEP72	ENSG00000112877	centrosomal protein 72 [Source:HGNC Symbol;Acc:HGNC:25547]	chr5	612340	667168	1	p15.33	53.78	protein_coding	3590
0.0022286	0.122	1339.35	2321.63	1.7334	202466_at	TENT4A	ENSG00000112941	terminal nucleotidyltransferase 4A [Source:HGNC Symbol;Acc:HGNC:16705]	chr5	6713432	6757044	1	p15.31	47.71	protein_coding	6356
0.003741	0.129	342.72	121.03	0.353145	218755_at	KIF20A	ENSG00000112984	kinesin family member 20A [Source:HGNC Symbol;Acc:HGNC:9787]	chr5	138178719	138187723	1	q31.2	45.25	protein_coding	3852
0.0057969	0.141	702.88	1006.27	1.43164	218398_at	MRPS30	ENSG00000112996	mitochondrial ribosomal protein S30 [Source:HGNC Symbol;Acc:HGNC:8769]	chr5	44808947	44820428	1	p12	36.56	protein_coding	6180
0.0094633	0.156	97.97	45.5	0.464428	206666_at	GZMK	ENSG00000113088	granzyme K [Source:HGNC Symbol;Acc:HGNC:4711]	chr5	55024256	55034570	1	q11.2	40.28	protein_coding	1567
0.0034257	0.128	375.36	215.14	0.573156	219625_s_at	CERT1	ENSG00000113163	ceramide transporter 1 [Source:HGNC Symbol;Acc:HGNC:2205]	chr5	75356345	75512138	-1	q13.3	37.4	protein_coding	14492
0.0056971	0.141	1158.48	482.57	0.416554	217865_at	RNF130	ENSG00000113269	ring finger protein 130 [Source:HGNC Symbol;Acc:HGNC:18280]	chr5	179911651	180072113	-1	q35.3	42.83	protein_coding	12817
0.0062688	0.143	44.34	86.51	1.95106	219932_at	SLC27A6	ENSG00000113396	solute carrier family 27 member 6 [Source:HGNC Symbol;Acc:HGNC:11000]	chr5	128538013	129033642	1	q23.3	37.22	protein_coding	3133
0.0024982	0.122	33.39	57.95	1.73555	219177_at	BRIX1	ENSG00000113460	biogenesis of ribosomes BRX1 [Source:HGNC Symbol;Acc:HGNC:24170]	chr5	34915677	34925996	1	p13.2	37.61	protein_coding	4710
0.0034127	0.128	841.42	1594.02	1.89444	218066_at	SLC12A7	ENSG00000113504	solute carrier family 12 member 7 [Source:HGNC Symbol;Acc:HGNC:10915]	chr5	1050384	1112063	-1	p15.33	62.05	protein_coding	6004
0.0061828	0.143	400.91	173.48	0.432716	214500_at	MACROH2A1	ENSG00000113648	macroH2A.1 histone [Source:HGNC Symbol;Acc:HGNC:4740]	chr5	135333900	135399914	-1	q31.1	47.07	protein_coding	17730
0.003734	0.129	201.09	324.29	1.61266	1556007_s_at	CSNK1A1	ENSG00000113712	casein kinase 1 alpha 1 [Source:HGNC Symbol;Acc:HGNC:2451]	chr5	149492982	149551471	-1	q32	39.26	protein_coding	8505
0.0026046	0.122	3270.89	5871.97	1.79522	203140_at	BCL6	ENSG00000113916	BCL6 transcription repressor [Source:HGNC Symbol;Acc:HGNC:1001]	chr3	187721377	187745725	-1	q27.3	47.68	protein_coding	5936
0.0036158	0.129	420.95	884.34	2.10082	228758_at	BCL6	ENSG00000113916	BCL6 transcription repressor [Source:HGNC Symbol;Acc:HGNC:1001]	chr3	187721377	187745725	-1	q27.3	47.68	protein_coding	5936
0.0085159	0.153	402.88	55.75	0.138379	210895_s_at	CD86	ENSG00000114013	CD86 molecule [Source:HGNC Symbol;Acc:HGNC:1705]	chr3	122055362	122121139	1	q13.33	40.77	protein_coding	3437
0.0055284	0.14	673.82	989.43	1.46839	202059_s_at	KPNA1	ENSG00000114030	karyopherin subunit alpha 1 [Source:HGNC Symbol;Acc:HGNC:6394]	chr3	122421902	122514945	-1	q21.1	38.26	protein_coding	8498
0.0072163	0.148	103.37	159.94	1.54726	202057_at	KPNA1	ENSG00000114030	karyopherin subunit alpha 1 [Source:HGNC Symbol;Acc:HGNC:6394]	chr3	122421902	122514945	-1	q21.1	38.26	protein_coding	8498
0.0017493	0.119	40.14	69.04	1.71998	1555785_a_at	XRN1	ENSG00000114127	5'-3' exoribonuclease 1 [Source:HGNC Symbol;Acc:HGNC:30654]	chr3	142306607	142448062	-1	q23	36.98	protein_coding	11982
0.007656	0.15	394.93	238.86	0.604816	228499_at	PFKFB4	ENSG00000114268	6-phosphofructo-2-kinase/fructose-2,6-biphosphatase 4 [Source:HGNC Symbol;Acc:HGNC:8875]	chr3	48517684	48562015	-1	p21.31	51.91	protein_coding	6107
0.0009871	0.115	900.53	494.27	0.548866	201040_at	GNAI2	ENSG00000114353	G protein subunit alpha i2 [Source:HGNC Symbol;Acc:HGNC:4385]	chr3	50226292	50259362	1	p21.31	57.36	protein_coding	7405
0.0031145	0.126	352.85	231.91	0.657248	209665_at	CYB561D2	ENSG00000114395	cytochrome b561 family member D2 [Source:HGNC Symbol;Acc:HGNC:30253]	chr3	50350845	50358460	1	p21.31	54.74	protein_coding	1926
0.002067	0.121	357.52	586.3	1.63991	218100_s_at	IFT57	ENSG00000114446	intraflagellar transport 57 [Source:HGNC Symbol;Acc:HGNC:17367]	chr3	108160812	108222435	-1	q13.13	35.23	protein_coding	3631
0.0058678	0.141	205.65	344.93	1.67727	222519_s_at	IFT57	ENSG00000114446	intraflagellar transport 57 [Source:HGNC Symbol;Acc:HGNC:17367]	chr3	108160812	108222435	-1	q13.13	35.23	protein_coding	3631
0.0063342	0.143	696.95	271.58	0.389669	225710_at	GNB4	ENSG00000114450	G protein subunit beta 4 [Source:HGNC Symbol;Acc:HGNC:20731]	chr3	179396088	179451476	-1	q26.33	39.07	protein_coding	7975
0.0033966	0.128	1290.75	782.79	0.606461	224838_at	FOXP1	ENSG00000114861	forkhead box P1 [Source:HGNC Symbol;Acc:HGNC:3823]	chr3	70954708	71583989	-1	p13	41.11	protein_coding	34819
0.0040145	0.131	147.41	67.41	0.457296	229844_at	FOXP1	ENSG00000114861	forkhead box P1 [Source:HGNC Symbol;Acc:HGNC:3823]	chr3	70954708	71583989	-1	p13	41.11	protein_coding	34819
0.007739	0.151	1054.71	704.84	0.668278	224837_at	FOXP1	ENSG00000114861	forkhead box P1 [Source:HGNC Symbol;Acc:HGNC:3823]	chr3	70954708	71583989	-1	p13	41.11	protein_coding	34819
0.0089644	0.154	543.24	320.46	0.589905	223287_s_at	FOXP1	ENSG00000114861	forkhead box P1 [Source:HGNC Symbol;Acc:HGNC:3823]	chr3	70954708	71583989	-1	p13	41.11	protein_coding	34819
0.0094068	0.156	31.26	52.07	1.66571	1554659_at	NEK4	ENSG00000114904	NIMA related kinase 4 [Source:HGNC Symbol;Acc:HGNC:11399]	chr3	52708444	52770946	-1	p21.1	42.79	protein_coding	6393
0.0003629	0.104	37.59	66.62	1.77228	231152_at	INO80D	ENSG00000114933	INO80 complex subunit D [Source:HGNC Symbol;Acc:HGNC:25997]	chr2	205993721	206086303	-1	q33.3	40.81	protein_coding	14373
0.0054066	0.14	172.82	58.53	0.338676	209606_at	CYTIP	ENSG00000115165	cytohesin 1 interacting protein [Source:HGNC Symbol;Acc:HGNC:9506]	chr2	157414619	157488961	-1	q24.1	37.75	protein_coding	3384
0.0026044	0.122	23.37	43.58	1.86478	208084_at	ITGB6	ENSG00000115221	integrin subunit beta 6 [Source:HGNC Symbol;Acc:HGNC:6161]	chr2	160099667	160200313	-1	q24.2	39.26	protein_coding	5785
0.0043583	0.134	17.4	37.07	2.13046	208083_s_at	ITGB6	ENSG00000115221	integrin subunit beta 6 [Source:HGNC Symbol;Acc:HGNC:6161]	chr2	160099667	160200313	-1	q24.2	39.26	protein_coding	5785
0.002531	0.122	210.75	134.88	0.64	218838_s_at	TTC31	ENSG00000115282	tetratricopeptide repeat domain 31 [Source:HGNC Symbol;Acc:HGNC:25759]	chr2	74483073	74494559	1	p13.1	50.92	protein_coding	4767
0.0005899	0.113	187.1	67.1	0.358632	219387_at	CCDC88A	ENSG00000115355	coiled-coil domain containing 88A [Source:HGNC Symbol;Acc:HGNC:25523]	chr2	55287842	55419895	-1	p16.1	36.44	protein_coding	33942
0.000974	0.115	99.06	40.08	0.404603	225045_at	CCDC88A	ENSG00000115355	coiled-coil domain containing 88A [Source:HGNC Symbol;Acc:HGNC:25523]	chr2	55287842	55419895	-1	p16.1	36.44	protein_coding	33942
0.0025389	0.122	59.56	20.81	0.349396	221078_s_at	CCDC88A	ENSG00000115355	coiled-coil domain containing 88A [Source:HGNC Symbol;Acc:HGNC:25523]	chr2	55287842	55419895	-1	p16.1	36.44	protein_coding	33942
0.0088791	0.154	255.49	390.39	1.52801	224721_at	WDR75	ENSG00000115368	WD repeat domain 75 [Source:HGNC Symbol;Acc:HGNC:25725]	chr2	189441446	189475552	1	q32.2	37.02	protein_coding	5040
0.0016745	0.119	7513.33	1869.12	0.248774	212464_s_at	FN1	ENSG00000115414	fibronectin 1 [Source:HGNC Symbol;Acc:HGNC:3778]	chr2	215360440	215436073	-1	q35	39.39	protein_coding	17216
0.0029258	0.124	10208.2	2660.95	0.260667	216442_x_at	FN1	ENSG00000115414	fibronectin 1 [Source:HGNC Symbol;Acc:HGNC:3778]	chr2	215360440	215436073	-1	q35	39.39	protein_coding	17216
0.0046641	0.135	10135.8	2677.9	0.264201	210495_x_at	FN1	ENSG00000115414	fibronectin 1 [Source:HGNC Symbol;Acc:HGNC:3778]	chr2	215360440	215436073	-1	q35	39.39	protein_coding	17216
0.0062456	0.143	10168.7	2684.48	0.263993	211719_x_at	FN1	ENSG00000115414	fibronectin 1 [Source:HGNC Symbol;Acc:HGNC:3778]	chr2	215360440	215436073	-1	q35	39.39	protein_coding	17216
0.0085679	0.153	47.33	82.22	1.73716	223080_at	GLS	ENSG00000115419	glutaminase [Source:HGNC Symbol;Acc:HGNC:4331]	chr2	190880821	190965552	1	q32.2	35.11	protein_coding	9833
0.0004265	0.105	334.02	77.88	0.23316	203217_s_at	ST3GAL5	ENSG00000115525	ST3 beta-galactoside alpha-2,3-sialyltransferase 5 [Source:HGNC Symbol;Acc:HGNC:10872]	chr2	85837120	85905199	-1	p11.2	45.07	protein_coding	16300
0.002928	0.124	570.65	860.04	1.50712	219675_s_at	UXS1	ENSG00000115652	UDP-glucuronate decarboxylase 1 [Source:HGNC Symbol;Acc:HGNC:17729]	chr2	106093308	106194301	-1	q12.2	45.01	protein_coding	6980
0.0003992	0.105	284.25	136.06	0.478663	201566_x_at	ID2	ENSG00000115738	inhibitor of DNA binding 2 [Source:HGNC Symbol;Acc:HGNC:5361]	chr2	8678845	8684461	1	p25.1	49.24	protein_coding	2213
0.0024111	0.122	2940.88	1232.67	0.41915	201565_s_at	ID2	ENSG00000115738	inhibitor of DNA binding 2 [Source:HGNC Symbol;Acc:HGNC:5361]	chr2	8678845	8684461	1	p25.1	49.24	protein_coding	2213
0.0069485	0.147	1249.16	594.45	0.47588	212552_at	HPCAL1	ENSG00000115756	hippocalcin like 1 [Source:HGNC Symbol;Acc:HGNC:5145]	chr2	10302889	10427617	1	p25.1	52.12	protein_coding	6237
0.0021367	0.121	33.48	55.86	1.66846	242549_at	PRKD3	ENSG00000115825	protein kinase D3 [Source:HGNC Symbol;Acc:HGNC:9408]	chr2	37250502	37324833	-1	p22.2	36.91	protein_coding	10269
8.85e-05	0.0815	105.14	32.51	0.309207	202664_at	WIPF1	ENSG00000115935	WAS/WASL interacting protein family member 1 [Source:HGNC Symbol;Acc:HGNC:12736]	chr2	174559572	174682916	-1	q31.1	41.82	protein_coding	9121
0.0032474	0.126	57.83	27.33	0.472592	202663_at	WIPF1	ENSG00000115935	WAS/WASL interacting protein family member 1 [Source:HGNC Symbol;Acc:HGNC:12736]	chr2	174559572	174682916	-1	q31.1	41.82	protein_coding	9121
0.0062182	0.143	416.79	771.55	1.85117	203622_s_at	PNO1	ENSG00000115946	partner of NOB1 homolog [Source:HGNC Symbol;Acc:HGNC:32790]	chr2	68157888	68176238	1	p14	40.98	protein_coding	2630
0.0031631	0.126	410.55	47.63	0.116015	203471_s_at	PLEK	ENSG00000115956	pleckstrin [Source:HGNC Symbol;Acc:HGNC:9070]	chr2	68365282	68397453	1	p14	41.17	protein_coding	3205
0.0098657	0.158	507	87.05	0.171696	203470_s_at	PLEK	ENSG00000115956	pleckstrin [Source:HGNC Symbol;Acc:HGNC:9070]	chr2	68365282	68397453	1	p14	41.17	protein_coding	3205
0.0053364	0.139	2823.85	4232.47	1.49883	201146_at	NFE2L2	ENSG00000116044	nuclear factor, erythroid 2 like 2 [Source:HGNC Symbol;Acc:HGNC:7782]	chr2	177227595	177392697	-1	q31.2	40.63	protein_coding	5671
0.0068137	0.147	96.56	146.82	1.52051	1567013_at	NFE2L2	ENSG00000116044	nuclear factor, erythroid 2 like 2 [Source:HGNC Symbol;Acc:HGNC:7782]	chr2	177227595	177392697	-1	q31.2	40.63	protein_coding	5671
0.0080351	0.151	1412.27	2201.72	1.55899	222667_s_at	ASH1L	ENSG00000116539	ASH1 like histone lysine methyltransferase [Source:HGNC Symbol;Acc:HGNC:19088]	chr1	155335268	155563162	-1	q22	41.42	protein_coding	13783
0.0085332	0.153	426.03	206.59	0.484919	223169_s_at	RHOU	ENSG00000116574	ras homolog family member U [Source:HGNC Symbol;Acc:HGNC:17794]	chr1	228735479	228746664	1	q42.13	45.48	protein_coding	3965
0.0002323	0.092	2531.9	5295.97	2.0917	203725_at	GADD45A	ENSG00000116717	growth arrest and DNA damage inducible alpha [Source:HGNC Symbol;Acc:HGNC:4095]	chr1	67685201	67688334	1	p31.3	52.65	protein_coding	1925
[truncated: 957 more rows]

## Sheet: GSE73091 Asc vs 1ary
Parametric p-value	FDR	Ascitic	Primary	Fold-change	ProbeSet	Gene_name	Gene_ID	Gene_description	Chromosome_scaffold_name	Gene_start_bp	Gene_end_bp	Strand	Karyotype_band	Gene_GC_content	Gene_type	Gene_Length
[truncated: 240 more rows]

[truncated: 8 more sheets: GSE73091 Met vs 1ary, GSE73091 Met vs Asc, GSE133296, GSE137237, GSE115573 Asc vs 1ary, GSE115573 Met vs 1ary, GSE115573 Met vs Asc, GSE98281]
