# Supplementary material for: Identification of lncRNAs Deregulated in Epithelial Ovarian Cancer Based on a Gene Expression Profiling Meta-Analysis
Source: Int J Mol Sci. 2023 Jun 28;24(13):10798. doi: 10.3390/ijms241310798 (PMC10341812; doi:10.3390/ijms241310798)
Supplement: Supplementary file 1 [file ijms-24-10798-s001.zip › Supplementary Table S8.xlsx]

## Sheet: STS8 Title
	Supplementary Table S8.- List of upregulated, downregulated, and "switch" lncRNAs in metastasis, including information about ROC and DESeq2 analyses with CCLE information and previous citations in EOC.

## Sheet: Up
												Up					DESeq2					ROC
	Previous references in EOC	Gene_description	Chromosome_scaffold_name	Gene_start_bp	Gene_end_bp	Strand	Karyotype_band	Gene_name	Gene_GC_content	Gene_type	Gene_Length	Asc_OV	Met_OV	Met_Asc	# comparisons	# studies	baseMean	log2FoldChange	lfcSE	pvalue	padj	AUC	SE.AUC	LowerLimit	UpperLimit	z	p-value
ENSG00000250786	-	small nucleolar RNA host gene 18 [Source:HGNC Symbol;Acc:HGNC:49007]	chr5	9546200	9550609	1	p15.31	SNHG18	46.64	lncRNA	1951		2		2	2						0.59688	0.07669	0.44657	0.74718	1.26326	0.2065
ENSG00000258537	-	FRMD6 antisense RNA 2 [Source:HGNC Symbol;Acc:HGNC:43637]	chr14	51454512	51599952	-1	q22.1	FRMD6-AS2	40.31	lncRNA	917		1		1	1						0.47812	0.04625	0.38748	0.56877	-0.473	0.63622
ENSG00000259969	-	novel transcript, overlapping C14orf37	chr14	57993545	57994525	-1	q23.1	ENSG00000259969	34.86	lncRNA	981			1	1	1						0.5275	0.07853	0.37358	0.68142	0.35018	0.72621
ENSG00000277954	-	novel transcript, antisense to WWOX	chr16	79202624	79206739	-1	q23.2	ENSG00000277954	42.32	lncRNA	4116			1	1	1						0.425	0.07596	0.27612	0.57388	-0.98735	0.32347
ENSG00000247982	-	long intergenic non-protein coding RNA 926 [Source:HGNC Symbol;Acc:HGNC:27514]	chr15	57300365	57307769	1	q21.3	LINC00926	49.29	lncRNA	3669		1		1	1						0.565	0.07883	0.4105	0.7195	0.82456	0.40962
ENSG00000256508	-	MRGPRF antisense RNA 1 [Source:HGNC Symbol;Acc:HGNC:51140]	chr11	69012283	69018447	1	q13.3	MRGPRF-AS1	58	lncRNA	2137		1		1	1						0.49188	0.04929	0.39526	0.58849	-0.16483	0.86908
ENSG00000224238	-	WARS2 intronic transcript 1 [Source:HGNC Symbol;Acc:HGNC:41393]	chr1	119047405	119064785	1	p12	WARS2-IT1	39.76	lncRNA	2060		1		1	1						0.42812	0.06942	0.29206	0.56419	-1.03535	0.3005
ENSG00000277351	-	novel transcript, antisense to SLC51B	chr15	65049188	65049802	-1	q22.31	ENSG00000277351	52.36	lncRNA	615		1		1	1						0.56938	0.06944	0.43327	0.70548	0.99904	0.31777
ENSG00000260807	-	cytoplasmic endogenous regulator of oxidative phosphorylation 1 [Source:HGNC Symbol;Acc:HGNC:53928]	chr16	975761	981596	-1	p13.3	CEROX1	64.43	lncRNA	3905		1		1	1						0.46312	0.07767	0.31089	0.61536	-0.47475	0.63497
ENSG00000250286	-	novel transcript, antisense to EPN3	chr17	50525520	50538761	-1	q21.33	ENSG00000250286	55.88	lncRNA	1655		1		1	1						0.41188	0.07641	0.26212	0.56163	-1.15336	0.24876
ENSG00000261269	-	novel transcript, overlapping ZNF366	chr5	72439903	72442387	-1	q13.2	ENSG00000261269	42.25	lncRNA	2485		1		1	1						0.51813	0.04793	0.42419	0.61206	0.37819	0.70529
ENSG00000267042	-	novel transcript, antisense to CCR10	chr17	42679963	42682020	1	q21.2	ENSG00000267042	58.21	lncRNA	542		1		1	1						0.57937	0.0636	0.45472	0.70403	1.24807	0.21201
ENSG00000269194	-	novel transcript, antisense to FUZ	chr19	49808933	49809738	1	q13.33	ENSG00000269194	68.24	lncRNA	520		1		1	1						0.60562	0.07551	0.45762	0.75363	1.39874	0.16189
ENSG00000281852	-	long intergenic non-protein coding RNA 891 [Source:HGNC Symbol;Acc:HGNC:48577]	chrX	71697196	71706455	1	q13.1	LINC00891	43.43	lncRNA	4113		1		1	1						0.52188	0.07639	0.37215	0.6716	0.28635	0.77461
ENSG00000257242	-	long intergenic non-protein coding RNA 1619 [Source:HGNC Symbol;Acc:HGNC:27409]	chr12	91984976	92142914	-1	q21.33	LINC01619	38.41	lncRNA	4833	1	1		2	2						0.55812	0.07875	0.40378	0.71247	0.7381	0.46045
ENSG00000231367	-	long intergenic non-protein coding RNA 2613 [Source:HGNC Symbol;Acc:HGNC:54068]	chr2	38406527	38515934	-1	p22.1	LINC02613	45.52	lncRNA	5386		1		1	1						0.53313	0.07718	0.38185	0.6844	0.42918	0.6678
ENSG00000274536	-	MIR223 host gene [Source:HGNC Symbol;Acc:HGNC:54520]	chrX	66015461	66020422	1	q12	MIR223HG	43.47	lncRNA	4053		1		1	1						0.61	0.07082	0.47119	0.74881	1.55315	0.12039
ENSG00000257894	-	novel transcript	chr12	79341205	79503396	-1	q21.2	ENSG00000257894	38.48	lncRNA	2253		1		1	1						0.48125	0.07947	0.32549	0.63701	-0.23594	0.81348
ENSG00000272823	-	novel transcript	chr1	220828676	220829211	-1	q41	ENSG00000272823	44.96	lncRNA	536		1		1	1						0.48625	0.06575	0.35739	0.61511	-0.20914	0.83434
ENSG00000227591	-	HSD11B1 antisense RNA 1 [Source:HGNC Symbol;Acc:HGNC:54053]	chr1	209661364	209724125	-1	q32.2	HSD11B1-AS1	41.63	lncRNA	477		1		1	1						0.48875	0.07342	0.34485	0.63265	-0.15323	0.87822
ENSG00000277631	-	PGM5P3 antisense RNA 1 [Source:HGNC Symbol;Acc:HGNC:51194]	chr9	72670	89850	1	p24.3	PGM5P3-AS1	42.93	lncRNA	3116		1		1	1						0.53937	0.06731	0.40744	0.67131	0.58495	0.55858
ENSG00000238057	-	ZEB2 antisense RNA 1 [Source:HGNC Symbol;Acc:HGNC:37149]	chr2	144517978	144521477	1	q22.3	ZEB2-AS1	43	lncRNA	3138		1		1	1						0.4675	0.06836	0.33352	0.60148	-0.47542	0.63449
ENSG00000235026	-	DPP10 antisense RNA 1 [Source:HGNC Symbol;Acc:HGNC:40941]	chr2	115126622	115161384	-1	q14.1	DPP10-AS1	37.33	lncRNA	9293		1		1	1						0.4125	0.06538	0.28436	0.54064	-1.3384	0.18077
ENSG00000234456	[41]	MAGI2 antisense RNA 3 [Source:HGNC Symbol;Acc:HGNC:40862]	chr7	79452877	79471208	1	q21.11	MAGI2-AS3	38.5	lncRNA	17783		1		1	1						0.54937	0.0785	0.39551	0.70324	0.62895	0.52938
ENSG00000237125	[42]	HAND2 antisense RNA 1 [Source:HGNC Symbol;Acc:HGNC:48872]	chr4	173527270	173659696	1	q34.1	HAND2-AS1	39.48	lncRNA	21212		1		1	1						0.54375	0.07863	0.38964	0.69786	0.55641	0.57793
ENSG00000253552	-	HOXA cluster antisense RNA 2 [Source:HGNC Symbol;Acc:HGNC:43745]	chr7	27107777	27134302	1	p15.2	HOXA-AS2	49.71	lncRNA	5431		2		2	2						0.49812	0.07783	0.34558	0.65067	-0.02409	0.98078
ENSG00000234494	[107]	SP2 antisense RNA 1 [Source:HGNC Symbol;Acc:HGNC:51341]	chr17	47897330	47941410	-1	q21.32	SP2-AS1	47.92	lncRNA	2531		1		1	1						0.41938	0.07667	0.26911	0.56964	-1.05162	0.29298
ENSG00000248890	[168]	HHIP antisense RNA 1 [Source:HGNC Symbol;Acc:HGNC:44182]	chr4	144642922	144661357	-1	q31.21	HHIP-AS1	38.13	lncRNA	2153		1		1	1						0.52875	0.07889	0.37413	0.68337	0.36444	0.71553
ENSG00000232677	[39]	long intergenic non-protein coding RNA 665 [Source:HGNC Symbol;Acc:HGNC:44323]	chr19	36259540	36331770	-1	q13.12	LINC00665	57.55	lncRNA	12167			1	1	1						0.56	0.07739	0.40832	0.71168	0.77532	0.43815
ENSG00000234171	[139]	RNASEH1 antisense RNA 1 [Source:HGNC Symbol;Acc:HGNC:49289]	chr2	3558474	3564842	1	p25.3	RNASEH1-AS1	47.56	lncRNA	4377	1			1	1						0.46625	0.07897	0.31147	0.62103	-0.42736	0.66912
ENSG00000176124	[148]	deleted in lymphocytic leukemia 1 [Source:HGNC Symbol;Acc:HGNC:13747]	chr13	50082169	50906856	1	q14.2	DLEU1	39.63	lncRNA	24037	1	1		2	1						0.39875	0.07999	0.24198	0.55552	-1.26582	0.20558
ENSG00000271856	[157]	long intergenic non-protein coding RNA 1215 [Source:HGNC Symbol;Acc:HGNC:49651]	chr3	108125821	108138610	1	q13.12	LINC01215	40.38	lncRNA	2592			1	1	1						0.53625	0.0784	0.38258	0.68992	0.46236	0.64383
ENSG00000285230	-	RALY antisense RNA 1 [Source:HGNC Symbol;Acc:HGNC:50743]	chr20	33980679	33994357	-1	q11.22	RALY-AS1	48.64	lncRNA	10152	1			1	1						0.56438	0.07877	0.40998	0.71877	0.81723	0.4138
ENSG00000266835	-	gastric adenocarcinoma associated, positive CD44 regulator, long intergenic non-coding RNA [Source:HGNC Symbol;Acc:HGNC:51308]	chr18	3466250	3478978	1	p11.31	GAPLINC	45.64	lncRNA	1051		1		1	1						0.53938	0.07673	0.38899	0.68976	0.51317	0.60783
ENSG00000249035	-	colorectal liver metastasis associated transcript 3 [Source:HGNC Symbol;Acc:HGNC:52287]	chr5	151676945	151725473	1	q33.1	CLMAT3	45.21	lncRNA	3087			1	1	1						0.41187	0.07612	0.26269	0.56106	-1.15778	0.24695
ENSG00000227039	[168]	ITGB2 antisense RNA 1 [Source:HGNC Symbol;Acc:HGNC:44304]	chr21	44921051	44929678	1	q22.3	ITGB2-AS1	49.14	lncRNA	2438		1		1	1						0.4825	0.07882	0.32801	0.63699	-0.22202	0.8243
ENSG00000256234	-	novel transcript, antisense to SSPN and ITPR2	chr12	26211164	26335856	-1	p11.23	ENSG00000256234	41.03	lncRNA	699			1	1	1						0.48562	0.0743	0.34001	0.63124	-0.19349	0.84658
ENSG00000228315	-	GUSB pseudogene 11 [Source:HGNC Symbol;Acc:HGNC:42325]	chr22	23638487	23717356	-1	q11.23	GUSBP11	50.35	lncRNA	7764			1	1	1						0.60813	0.07782	0.4556	0.76065	1.38943	0.1647
ENSG00000233429	[220]	HOXA transcript antisense RNA, myeloid-specific 1 [Source:HGNC Symbol;Acc:HGNC:37117]	chr7	27095647	27100265	1	p15.2	HOTAIRM1	53.93	lncRNA	1496	1	1		2	2						0.41812	0.07729	0.26665	0.5696	-1.05938	0.28943
ENSG00000253522	-	MIR3142 host gene [Source:HGNC Symbol;Acc:HGNC:51944]	chr5	160438594	160487426	1	q33.3	MIR3142HG	42.44	lncRNA	2377		1		1	1						0.4925	0.07849	0.33865	0.64635	-0.09555	0.92388
ENSG00000258572	[234]	novel transcript	chr14	95516136	95517911	1	q32.13	ENSG00000258572	64.53	lncRNA	993		1		1	1						0.5125	0.0692	0.37686	0.64814	0.18063	0.85666
ENSG00000236901	[208]	MIR600 host gene [Source:HGNC Symbol;Acc:HGNC:23642]	chr9	123109494	123115477	-1	q33.3	MIR600HG	53.98	lncRNA	5984			1	1	1						0.59625	0.07839	0.44261	0.74989	1.22783	0.21951
ENSG00000249599	[212]	BMPR1B divergent transcript [Source:HGNC Symbol;Acc:HGNC:50864]	chr4	94743668	94757681	-1	q22.3	BMPR1B-DT	37.7	lncRNA	791		1	1	2	1						0.55563	0.07107	0.41633	0.69492	0.78269	0.43381
ENSG00000261039	-	long intergenic non-protein coding RNA 2544 [Source:HGNC Symbol;Acc:HGNC:53578]	chr6	169175277	169182841	-1	q27	LINC02544	43.57	lncRNA	672		3	1	4	3						0.46	0.04262	0.37646	0.54354	-0.93843	0.34803
ENSG00000270547	-	long intergenic non-protein coding RNA 1235 [Source:HGNC Symbol;Acc:HGNC:49769]	chr9	13406380	13488125	-1	p23	LINC01235	37.93	lncRNA	3023		3	1	4	3						0.44375	0.07215	0.30233	0.58517	-0.7796	0.43563
ENSG00000229056	-	HECW2 antisense RNA 1 [Source:HGNC Symbol;Acc:HGNC:54062]	chr2	196260024	196264204	1	q32.3	HECW2-AS1	37.93	lncRNA	1607		2	1	3	2						0.41812	0.06757	0.28569	0.55056	-1.21168	0.22564
ENSG00000171889	-	MIR31 host gene [Source:HGNC Symbol;Acc:HGNC:37187]	chr9	21453802	21559900	-1	p21.3	MIR31HG	37.64	lncRNA	2816	1	2		3	2						0.53312	0.07953	0.37725	0.689	0.4165	0.67704
ENSG00000271474	-	UNC5C antisense RNA 1 [Source:HGNC Symbol;Acc:HGNC:55246]	chr4	95549129	95552457	1	q22.3	UNC5C-AS1	44.58	lncRNA	3329		1	1	2	2						0.65375	0.07283	0.511	0.7965	2.11105	0.03477
ENSG00000282057	-	novel transcript	chr1	85482281	85578250	-1	p22.3	ENSG00000282057	39.43	lncRNA	3607		1	1	2	2	63.9703	0.826411	0.827075	0.00327209	0.165754	0.33	0.07503	0.18294	0.47706	-2.26564	0.02347
ENSG00000261327	-	novel transcript	chr16	88177298	88186929	-1	q24.2	ENSG00000261327	48.9	lncRNA	2376		2		2	2						0.385	0.06031	0.2668	0.5032	-1.90687	0.05654
ENSG00000259807	-	novel transcript	chr16	29215385	29221040	-1	p11.2	ENSG00000259807	48.87	lncRNA	4772		1	1	2	2						0.37937	0.06755	0.24698	0.51177	-1.78578	0.07413
ENSG00000223403	[194]	maternally expressed 9 [Source:HGNC Symbol;Acc:HGNC:43874]	chr14	101068283	101072937	1	q32.31	MEG9	54.52	lncRNA	4655		1	1	2	2						0.605	0.07008	0.46764	0.74236	1.49819	0.13408
ENSG00000177234	-	long intergenic non-protein coding RNA 1561 [Source:HGNC Symbol;Acc:HGNC:31365]	chr10	120597949	120600124	1	q26.12	LINC01561	51.7	lncRNA	2176		2		2	2						0.40938	0.06767	0.27673	0.54202	-1.33913	0.18053
ENSG00000261742	[239]	long intergenic non-protein coding RNA 922 [Source:HGNC Symbol;Acc:HGNC:27545]	chr16	65284496	65576345	-1	q21	LINC00922	39.67	lncRNA	2325		2		2	2						0.45063	0.0542	0.3444	0.55685	-0.91103	0.36228
ENSG00000231528	-	family with sequence similarity 225 member A [Source:HGNC Symbol;Acc:HGNC:27855]	chr9	113113042	113119928	1	q32	FAM225A	54.06	lncRNA	6131		2		2	2						0.45438	0.07834	0.30082	0.60793	-0.58237	0.56032
ENSG00000254369	[240]	HOXA cluster antisense RNA 3 [Source:HGNC Symbol;Acc:HGNC:43748]	chr7	27129977	27155928	1	p15.2	HOXA-AS3	51.21	lncRNA	5967		1	1	2	2						0.53562	0.07906	0.38067	0.69058	0.45059	0.65228
ENSG00000246430	[241]	long intergenic non-protein coding RNA 968 [Source:HGNC Symbol;Acc:HGNC:48727]	chr8	56496048	56559823	-1	q12.1	LINC00968	41.75	lncRNA	3369		2		2	2						0.4725	0.06246	0.35008	0.59492	-0.44027	0.65974
ENSG00000271811	-	novel transcript	chr1	170667381	170669425	1	q24.2	ENSG00000271811	48.07	lncRNA	2045		1	1	2	2						0.47625	0.05699	0.36455	0.58795	-0.41675	0.67686
ENSG00000272755	-	novel transcript	chr1	149264252	149264816	1	q21.2	ENSG00000272755	30.27	lncRNA	565		1	1	2	2						0.53188	0.07827	0.37847	0.68528	0.40725	0.68383
ENSG00000233682	-	novel transcript, antisense to FNDC1	chr6	159165899	159170007	-1	q25.3	ENSG00000233682	55.37	lncRNA	822		1	1	2	2						0.5275	0.07068	0.38896	0.66604	0.38906	0.69723
ENSG00000248540	-	novel transcript	chr15	74125915	74129341	-1	q24.1	ENSG00000248540	56.32	lncRNA	3301		2		2	2						0.475	0.07215	0.33359	0.61641	-0.3465	0.72897
ENSG00000259663	-	novel transcript, antisense to ISL1	chr5	51372736	51383332	-1	q11.1	ENSG00000259663	41.79	lncRNA	7152		1	1	2	2						0.52313	0.07816	0.36994	0.67631	0.29587	0.76733
ENSG00000223764	-	long intergenic non-protein coding RNA 2593 [Source:HGNC Symbol;Acc:HGNC:53933]	chr1	916865	921016	-1	p36.33	LINC02593	61.68	lncRNA	4152		1	1	2	2						0.4875	0.08117	0.3284	0.6466	-0.15399	0.87762
ENSG00000249835	-	VCAN antisense RNA 1 [Source:HGNC Symbol;Acc:HGNC:40163]	chr5	83531352	83581320	-1	q14.3	VCAN-AS1	36.44	lncRNA	877		1	1	2	1						0.4575	0.03581	0.38732	0.52768	-1.18696	0.23524
ENSG00000236841	-	novel transcript	chr2	162159762	162173223	1	q24.2	ENSG00000236841	37.18	lncRNA	4157		1	1	2	1						0.42062	0.07057	0.28231	0.55894	-1.12475	0.26069
ENSG00000230838	-	long intergenic non-protein coding RNA 1614 [Source:HGNC Symbol;Acc:HGNC:51847]	chr2	215718043	215719424	1	q35	LINC01614	39.36	lncRNA	648		1	1	2	1						0.55437	0.05299	0.45052	0.65823	1.02618	0.30481
ENSG00000226419	-	SLC16A1 antisense RNA 1 [Source:HGNC Symbol;Acc:HGNC:49445]	chr1	112956415	113047055	1	p13.2	SLC16A1-AS1	43.76	lncRNA	12677	1	1		2	1						0.45187	0.07757	0.29984	0.60391	-0.6204	0.53499
ENSG00000224259	[242]	long intergenic non-protein coding RNA 1133 [Source:HGNC Symbol;Acc:HGNC:49447]	chr1	159958035	159984750	1	q23.2	LINC01133	45.81	lncRNA	3676	1	1		2	1						0.45812	0.07731	0.3066	0.60965	-0.54164	0.58806
ENSG00000267257	-	novel transcript, antisense to ALPK2	chr18	58535415	58538552	1	q21.31	ENSG00000267257	47.39	lncRNA	2553		1	1	2	1						0.4625	0.07912	0.30744	0.61756	-0.47399	0.63551
ENSG00000236671	[243]	PRKG1 antisense RNA 1 [Source:HGNC Symbol;Acc:HGNC:45029]	chr10	52230398	52314507	-1	q21.1	PRKG1-AS1	36.23	lncRNA	6307		1	1	2	1						0.46438	0.07709	0.31327	0.61548	-0.4621	0.64401
ENSG00000240040	-	novel transcript	chr2	88811186	88861563	-1	p11.2	ENSG00000240040	42.75	lncRNA	705		1	1	2	1						0.4825	0.04144	0.40129	0.56371	-0.42235	0.67277
ENSG00000233970	-	novel transcript	chr2	692083	693235	-1	p25.3	ENSG00000233970	56.98	lncRNA	571		1	1	2	1						0.51438	0.05808	0.40054	0.62821	0.2475	0.80452
ENSG00000261804	-	novel transcript	chr16	53373479	53385019	1	q12.2	ENSG00000261804	39.11	lncRNA	1394		1	1	2	1						0.51875	0.07718	0.36747	0.67003	0.24292	0.80806
ENSG00000177822	-	TENM3 antisense RNA 1 [Source:HGNC Symbol;Acc:HGNC:28076]	chr4	181874438	182145249	-1	q34.3	TENM3-AS1	39.36	lncRNA	6149		1		1	1						0.6725	0.07276	0.5299	0.8151	2.37085	0.01775
ENSG00000225331	-	long intergenic non-protein coding RNA 1678 [Source:HGNC Symbol;Acc:HGNC:52466]	chr21	44158740	44160076	-1	q22.3	LINC01678	64.55	lncRNA	867		1		1	1						0.66563	0.07149	0.5255	0.80575	2.31666	0.02052
ENSG00000250410	-	novel transcript	chr4	185370725	185390928	1	q35.1	ENSG00000250410	41.88	lncRNA	587		1		1	1						0.6625	0.07038	0.52457	0.80043	2.30904	0.02094
ENSG00000261604	-	novel transcript, antisense to HMGCS1	chr5	43287601	43290839	1	p12	ENSG00000261604	35.91	lncRNA	2497			1	1	1						0.65625	0.07439	0.51044	0.80206	2.10034	0.0357
ENSG00000227496	-	novel transcript	chr1	225700264	225752258	1	q42.12	ENSG00000227496	46.78	lncRNA	3547		1		1	1	85.3547	2.07561	0.815501	0.000228499	0.0310913	0.46188	0.07816	0.30869	0.61506	-0.4878	0.62569
ENSG00000257219	[170]	lncRNA osteogenesis associated [Source:HGNC Symbol;Acc:HGNC:53336]	chr12	76259836	76305969	1	q21.2	LNCOG	42.2	lncRNA	2108		1		1	1	7.61948	2.86045	1.17067	0.0255851	0.449377	0.49	0.07209	0.34871	0.63129	-0.13872	0.88967
ENSG00000250133	-	HOXC cluster antisense RNA 2 [Source:HGNC Symbol;Acc:HGNC:43750]	chr12	53993810	53996785	-1	q13.13	HOXC-AS2	59.95	lncRNA	2216			1	1	1						0.30313	0.07683	0.15253	0.45372	-2.56235	0.0104
ENSG00000272282	-	long intergenic non-protein coding RNA 2084 [Source:HGNC Symbol;Acc:HGNC:52934]	chr3	27712910	27714005	1	p24.1	LINC02084	50.82	lncRNA	1096		1		1	1						0.33938	0.06755	0.20698	0.47177	-2.37796	0.01741
ENSG00000250451	-	HOXC cluster antisense RNA 1 [Source:HGNC Symbol;Acc:HGNC:43749]	chr12	53999022	54000010	-1	q13.13	HOXC-AS1	56.22	lncRNA	592			1	1	1						0.33875	0.07904	0.18383	0.49367	-2.0401	0.04134
ENSG00000268895	-	A1BG antisense RNA 1 [Source:HGNC Symbol;Acc:HGNC:37133]	chr19	58347718	58355455	1	q13.43	A1BG-AS1	55.93	lncRNA	3374		1		1	1						0.64875	0.07609	0.49962	0.79788	1.95491	0.05059
ENSG00000274341	-	novel transcript	chr17	32408013	32408309	1	q11.2	ENSG00000274341	37.37	lncRNA	297		1		1	1						0.62813	0.06838	0.4941	0.76215	1.8737	0.06097
ENSG00000255399	-	TBX5 antisense RNA 1 [Source:HGNC Symbol;Acc:HGNC:27402]	chr12	114408173	114412831	1	q24.21	TBX5-AS1	49.95	lncRNA	4201		1		1	1						0.58125	0.04377	0.49547	0.66703	1.85635	0.0634
ENSG00000231437	-	long intergenic non-protein coding RNA 1750 [Source:HGNC Symbol;Acc:HGNC:52538]	chr1	111989770	111998842	1	p13.2	LINC01750	49.9	lncRNA	3590		1		1	1						0.40125	0.05367	0.29606	0.50644	-1.83993	0.06578
ENSG00000229214	-	long intergenic non-protein coding RNA 242 [Source:HGNC Symbol;Acc:HGNC:21249]	chr6	169788790	169799549	-1	q27	LINC00242	46.47	lncRNA	4496		1		1	1						0.6375	0.07538	0.48976	0.78524	1.82417	0.06813
ENSG00000226965	-	novel transcript	chr7	110108031	110534757	-1	q31.1	ENSG00000226965	36.34	lncRNA	3071		1		1	1						0.39875	0.05616	0.28869	0.50881	-1.80302	0.07138
ENSG00000245556	-	SCAMP1 antisense RNA 1 [Source:HGNC Symbol;Acc:HGNC:50544]	chr5	78342365	78360507	-1	q14.1	SCAMP1-AS1	42.36	lncRNA	5028	1			1	1						0.37	0.07405	0.22487	0.51513	-1.75565	0.07915
ENSG00000233355	[234]	CHRM3 antisense RNA 2 [Source:HGNC Symbol;Acc:HGNC:43725]	chr1	239703381	239770130	-1	q43	CHRM3-AS2	37.5	lncRNA	9393		1		1	1						0.3825	0.06718	0.25084	0.51416	-1.74911	0.08027
ENSG00000235770	-	long intergenic non-protein coding RNA 607 [Source:HGNC Symbol;Acc:HGNC:43944]	chr2	215611563	215848954	-1	q35	LINC00607	39.69	lncRNA	6958		1		1	1						0.37	0.07505	0.22291	0.51709	-1.73228	0.08322
ENSG00000258274	-	novel transcript	chr12	93707791	93737823	-1	q22	ENSG00000258274	38.86	lncRNA	1949		1		1	1						0.40812	0.05437	0.30156	0.51469	-1.68974	0.09108
ENSG00000227579	-	novel transcript	chr1	177392667	177920152	-1	q25.2	ENSG00000227579	40.07	lncRNA	2742		1		1	1						0.42437	0.0457	0.33481	0.51394	-1.65488	0.09795
ENSG00000227964	-	long intergenic non-protein coding RNA 1429 [Source:HGNC Symbol;Acc:HGNC:50741]	chr20	51831797	51862912	-1	q13.2	LINC01429	46.3	lncRNA	2326		1		1	1						0.41437	0.05193	0.3126	0.51615	-1.64887	0.09917
ENSG00000266088	-	novel transcript	chr17	40516892	40527002	1	q21.2	ENSG00000266088	48.5	lncRNA	1332		1		1	1						0.37625	0.0756	0.22807	0.52443	-1.63688	0.10166
ENSG00000225684	-	family with sequence similarity 225 member B [Source:HGNC Symbol;Acc:HGNC:21865]	chr9	113102117	113111543	-1	q32	FAM225B	50.06	lncRNA	7907		1		1	1						0.375	0.07658	0.2249	0.5251	-1.63226	0.10262
ENSG00000275496	-	novel transcript	chr21	6228966	6267317	-1	p12	ENSG00000275496	39.65	lncRNA	2878		1		1	1						0.37562	0.07711	0.22449	0.52676	-1.61294	0.10676
ENSG00000253629	-	novel transcript	chr8	101686547	101689093	1	q22.3	ENSG00000253629	44.05	lncRNA	361			1	1	1						0.565	0.04059	0.48545	0.64455	1.60152	0.10926
ENSG00000226777	-	family with sequence similarity 30 member A [Source:HGNC Symbol;Acc:HGNC:19955]	chr14	105917979	105932642	1	q32.33	FAM30A	55.93	lncRNA	9884			1	1	1						0.38562	0.07244	0.24365	0.5276	-1.57897	0.11434
ENSG00000236094	-	long intergenic non-protein coding RNA 545 [Source:HGNC Symbol;Acc:HGNC:43680]	chr13	30880912	30883395	1	q12.3	LINC00545	45.21	lncRNA	585		1		1	1						0.4225	0.04922	0.32603	0.51897	-1.57448	0.11538
ENSG00000263335	-	novel transcript, antisense to MYH11	chr16	15726674	15732993	1	p13.11	ENSG00000263335	50.3	lncRNA	836			1	1	1						0.60062	0.064	0.47519	0.72606	1.57224	0.11589
ENSG00000230530	-	LIMD1 antisense RNA 1 [Source:HGNC Symbol;Acc:HGNC:44107]	chr3	45676369	45689200	-1	p21.31	LIMD1-AS1	45.32	lncRNA	4528			1	1	1						0.38	0.07808	0.22697	0.53303	-1.53697	0.1243
ENSG00000232993	-	novel transcript	chr1	53069938	53085502	-1	p32.3	ENSG00000232993	55.97	lncRNA	467			1	1	1						0.57563	0.05126	0.47515	0.6761	1.47523	0.14015
ENSG00000275097	-	novel transcript, overlapping 3'UTR of FAM60A	chr12	31280422	31280895	-1	p11.21	ENSG00000275097	31.22	lncRNA	474			1	1	1						0.615	0.07911	0.45995	0.77005	1.45366	0.14604
ENSG00000174171	-	novel transcript, antisense to SPTBN5	chr15	41892777	41899528	1	q15.1	ENSG00000174171	54.84	lncRNA	6752		1		1	1						0.6075	0.0769	0.45678	0.75822	1.39793	0.16213
ENSG00000261332	-	novel transcript, antisense to ITGAL	chr16	30498766	30499554	-1	p11.2	ENSG00000261332	54.37	lncRNA	577	1			1	1						0.56437	0.04627	0.47368	0.65507	1.39118	0.16417
ENSG00000235426	-	novel transcript	chr10	79382328	79409274	1	q22.3	ENSG00000235426	54.41	lncRNA	511			1	1	1						0.605	0.07553	0.45696	0.75304	1.39017	0.16448
ENSG00000233527	-	ZNF529 antisense RNA 1 [Source:HGNC Symbol;Acc:HGNC:51275]	chr19	36573070	36594708	1	q13.12	ZNF529-AS1	42.2	lncRNA	3657			1	1	1						0.6075	0.07737	0.45586	0.75914	1.38945	0.1647
ENSG00000224843	[244]	long intergenic non-protein coding RNA 240 [Source:HGNC Symbol;Acc:HGNC:18772]	chr6	26956932	27059749	1	p22.2	LINC00240	36.82	lncRNA	8418			1	1	1						0.60375	0.07656	0.45369	0.75381	1.35513	0.17538
ENSG00000228427	-	novel transcript	chrX	71183384	71198208	-1	q13.1	ENSG00000228427	46.37	lncRNA	934		1		1	1						0.43312	0.05092	0.33331	0.53294	-1.31322	0.18911
ENSG00000267322	[245]	small nucleolar RNA host gene 22 [Source:HGNC Symbol;Acc:HGNC:50285]	chr18	49814023	49851059	1	q21.1	SNHG22	43.78	lncRNA	2593		1		1	1						0.59812	0.07609	0.44899	0.74726	1.28956	0.1972
ENSG00000233093	[246]	long intergenic non-protein coding RNA 892 [Source:HGNC Symbol;Acc:HGNC:48578]	chrX	136639539	136642429	1	q26.3	LINC00892	48.36	lncRNA	1922		1		1	1						0.455	0.0355	0.38542	0.52458	-1.26759	0.20494
ENSG00000225988	-	LAMP5 antisense RNA 1 [Source:HGNC Symbol;Acc:HGNC:40754]	chr20	9505180	9514998	-1	p12.2	LAMP5-AS1	45.81	lncRNA	1928			1	1	1						0.44375	0.0444	0.35674	0.53076	-1.26702	0.20515
ENSG00000268027	-	novel transcript, sense intronic to CEACAM21	chr19	41545192	41555462	1	q13.2	ENSG00000268027	41.63	lncRNA	1440		1		1	1						0.42062	0.06294	0.29726	0.54399	-1.26107	0.20728
ENSG00000233858	[247]	long intergenic non-protein coding RNA 2599 [Source:HGNC Symbol;Acc:HGNC:53931]	chr8	48590401	48594621	1	q11.21	LINC02599	50.2	lncRNA	3549		1		1	1						0.42375	0.06192	0.3024	0.5451	-1.23151	0.21813
ENSG00000188511	-	chromosome 22 putative open reading frame 34 [Source:HGNC Symbol;Acc:HGNC:28010]	chr22	49414524	49657542	-1	q13.33	C22orf34	51.01	lncRNA	6769		1		1	1						0.41438	0.07073	0.27576	0.55299	-1.21067	0.22602
ENSG00000267650	-	novel transcript, antisense to COL5A3	chr19	9995997	9997163	1	p13.2	ENSG00000267650	55.87	lncRNA	1167			1	1	1						0.45688	0.03571	0.38688	0.52687	-1.20751	0.22723
ENSG00000232807	-	novel transcript, antisense to FBXO18	chr10	5934270	5945900	-1	p15.1	ENSG00000232807	49.55	lncRNA	3912		1		1	1						0.59312	0.07856	0.43916	0.74709	1.18544	0.23584
ENSG00000233521	-	long intergenic non-protein coding RNA 1638 [Source:HGNC Symbol;Acc:HGNC:52425]	chr22	27221349	27225134	-1	q12.1	LINC01638	45.91	lncRNA	1271		1		1	1						0.41188	0.07557	0.26376	0.55999	-1.16616	0.24355
ENSG00000247774	[194]	PCED1B antisense RNA 1 [Source:HGNC Symbol;Acc:HGNC:44166]	chr12	47205898	47216456	-1	q13.11	PCED1B-AS1	42.57	lncRNA	3970		1		1	1						0.40625	0.08081	0.24787	0.56463	-1.16014	0.24599
ENSG00000237928	-	NFIA antisense RNA 2 [Source:HGNC Symbol;Acc:HGNC:40401]	chr1	60912675	61056885	-1	p31.3	NFIA-AS2	43.01	lncRNA	6214		1		1	1						0.44	0.05203	0.33802	0.54198	-1.15311	0.24886
ENSG00000240758	-	novel transcript	chr7	128455937	128469197	1	q32.1	ENSG00000240758	45.6	lncRNA	662			1	1	1						0.58812	0.07729	0.43663	0.73962	1.14012	0.25424
ENSG00000278058	-	novel transcript	chr16	79605802	79606605	1	q23.2	ENSG00000278058	44.53	lncRNA	804		1		1	1						0.43125	0.0604	0.31287	0.54963	-1.13827	0.25501
ENSG00000235237	-	novel transcript	chr22	37166757	37182850	1	q12.3	ENSG00000235237	54.09	lncRNA	630			1	1	1						0.4175	0.07346	0.27352	0.56148	-1.12307	0.26141
ENSG00000247131	-	novel transcript, antisense to RAB3IP	chr12	69713633	69738574	-1	q15	ENSG00000247131	36.95	lncRNA	2794		1		1	1						0.56188	0.05624	0.45164	0.67211	1.10015	0.27127
ENSG00000251257	-	novel transcript	chr5	38460925	38468339	-1	p13.1	ENSG00000251257	49.04	lncRNA	726		1		1	1						0.42687	0.06713	0.29531	0.55844	-1.08934	0.276
ENSG00000269918	-	novel transcript	chr8	11104691	11106704	-1	p23.1	ENSG00000269918	41.16	lncRNA	2014		1		1	1						0.41375	0.0792	0.25851	0.56899	-1.08896	0.27617
ENSG00000274383	-	novel transcript, antisense to ANKDD1A	chr15	64950916	64951435	-1	q22.31	ENSG00000274383	41.92	lncRNA	520		1		1	1						0.58688	0.08059	0.42892	0.74483	1.078	0.28103
ENSG00000205054	-	long intergenic non-protein coding RNA 1121 [Source:HGNC Symbol;Acc:HGNC:49266]	chr2	45164816	45323397	-1	p21	LINC01121	44.5	lncRNA	4867		1		1	1						0.42188	0.07269	0.2794	0.56435	-1.07474	0.28249
ENSG00000269933	-	novel transcript, sense intronic to PTGER3	chr1	71005854	71006502	-1	p31.1	ENSG00000269933	36.52	lncRNA	649		1		1	1						0.44688	0.04946	0.34993	0.54382	-1.07409	0.28278
ENSG00000263873	-	THY1 antisense RNA 1 [Source:HGNC Symbol;Acc:HGNC:54852]	chr11	119417951	119419114	1	q23.3	THY1-AS1	58.08	lncRNA	632			1	1	1						0.58062	0.07576	0.43213	0.72912	1.06417	0.28725
ENSG00000250320	-	EDIL3 divergent transcript [Source:HGNC Symbol;Acc:HGNC:40204]	chr5	84382424	84490765	1	q14.3	EDIL3-DT	35.47	lncRNA	8995		1		1	1						0.41875	0.07788	0.2661	0.5714	-1.04322	0.29685
ENSG00000225470	[248]	JPX transcript, XIST activator [Source:HGNC Symbol;Acc:HGNC:37191]	chrX	73944182	74070408	1	q13.2	JPX	38.98	lncRNA	20655	1			1	1						0.41875	0.07881	0.26428	0.57322	-1.03096	0.30256
ENSG00000232679	-	long intergenic non-protein coding RNA 1705 [Source:HGNC Symbol;Acc:HGNC:52493]	chr1	222010825	222064773	-1	q41	LINC01705	42.01	lncRNA	1896		1		1	1						0.57125	0.06971	0.43462	0.70788	1.02212	0.30673
ENSG00000225756	-	DBH antisense RNA 1 [Source:HGNC Symbol;Acc:HGNC:24155]	chr9	133654586	133657313	-1	q34.2	DBH-AS1	61.47	lncRNA	2139		1		1	1						0.42312	0.07558	0.275	0.57125	-1.01716	0.30908
ENSG00000250413	-	SLC2A9 antisense RNA 1 [Source:HGNC Symbol;Acc:HGNC:40636]	chr4	10006482	10009725	1	p16.1	SLC2A9-AS1	46.33	lncRNA	459		1		1	1						0.56563	0.06482	0.43858	0.69267	1.01243	0.31133
ENSG00000228343	-	novel transcript	chrX	48579774	48581157	-1	p11.23	ENSG00000228343	45.38	lncRNA	450			1	1	1						0.52	0.02	0.4808	0.5592	1	0.31731
ENSG00000236886	-	novel transcript, antisense to IGFBP5 and TNP1	chr2	216694464	216994079	1	q35	ENSG00000236886	44.57	lncRNA	904			1	1	1						0.52	0.02	0.4808	0.5592	1	0.31731
ENSG00000254568	-	novel transcript	chr11	124883691	124887789	1	q24.2	ENSG00000254568	54.26	lncRNA	744			1	1	1						0.52	0.02	0.4808	0.5592	1	0.31731
ENSG00000259018	-	novel transcript, antisense to EFS	chr14	23356406	23357003	1	q11.2	ENSG00000259018	50.33	lncRNA	285			1	1	1						0.52	0.02	0.4808	0.5592	1	0.31731
ENSG00000254943	-	novel transcript, antisense to ROBO4	chr11	124891304	124892126	1	q24.2	ENSG00000254943	57.35	lncRNA	477			1	1	1						0.48438	0.01562	0.45375	0.515	-1	0.31731
ENSG00000273341	-	novel transcript	chr7	77416673	77425444	1	q11.23	ENSG00000273341	39.67	lncRNA	734		1		1	1						0.5525	0.05286	0.4489	0.6561	0.99327	0.32058
ENSG00000272168	[249]	cancer susceptibility 15 [Source:HGNC Symbol;Acc:HGNC:28245]	chr6	21664185	22654455	1	p22.3	CASC15	39.41	lncRNA	34302		1		1	1						0.57687	0.07755	0.42489	0.72886	0.99133	0.32152
ENSG00000266378	-	novel transcript	chr17	14327335	14329474	1	p12	ENSG00000266378	40.42	lncRNA	2140		1		1	1						0.55438	0.0555	0.4456	0.66315	0.97974	0.32722
ENSG00000255400	-	novel transcript	chr11	12086891	12089441	1	p15.3	ENSG00000255400	48.73	lncRNA	550		1		1	1						0.44375	0.05886	0.32838	0.55912	-0.95561	0.33927
ENSG00000281103	-	T cell receptor gamma locus antisense RNA 1 [Source:HGNC Symbol;Acc:HGNC:48974]	chr7	38341577	38378804	1	p14.1	TRG-AS1	41.79	lncRNA	7416		1		1	1						0.42688	0.07836	0.27329	0.58046	-0.93316	0.35074
ENSG00000233117	[250]	long intergenic non-protein coding RNA 702 [Source:HGNC Symbol;Acc:HGNC:44676]	chr10	4201141	4243912	-1	p15.1	LINC00702	39.08	lncRNA	12382		1		1	1						0.42875	0.07673	0.27835	0.57915	-0.92853	0.35313
ENSG00000268941	[239]	long intergenic non-protein coding RNA 1711 [Source:HGNC Symbol;Acc:HGNC:28663]	chr20	58634772	58635738	1	q13.32	LINC01711	59.36	lncRNA	967		1		1	1						0.43062	0.07765	0.27844	0.58281	-0.89347	0.3716
ENSG00000268746	-	novel transcript	chr19	47607524	47733098	1	q13.33	ENSG00000268746	52	lncRNA	344		1		1	1						0.47188	0.03277	0.40764	0.53611	-0.85819	0.39079
ENSG00000225535	-	long intergenic non-protein coding RNA 1393 [Source:HGNC Symbol;Acc:HGNC:50669]	chr7	115030564	115126314	1	q31.2	LINC01393	35.97	lncRNA	2300		1		1	1						0.56375	0.07568	0.41543	0.71207	0.84241	0.39956
ENSG00000227906	[206]	SNAP25 antisense RNA 1 [Source:HGNC Symbol;Acc:HGNC:44312]	chr20	10006381	10368776	-1	p12.2	SNAP25-AS1	40.08	lncRNA	14619		1		1	1						0.56375	0.07699	0.41285	0.71465	0.82801	0.40767
ENSG00000272783	-	novel transcript	chr4	1550284	1550572	1	p16.3	ENSG00000272783	61.25	lncRNA	289		1		1	1						0.47312	0.03294	0.40856	0.53769	-0.81583	0.4146
ENSG00000262292	-	GRAPL long non-coding downstream RNA [Source:HGNC Symbol;Acc:HGNC:55226]	chr17	19160789	19162274	1	p11.2	GRAPLDR	53.23	lncRNA	1486		1		1	1						0.44125	0.07365	0.2969	0.5856	-0.79772	0.42503
ENSG00000277152	-	novel transcript	chr15	66860303	66867023	1	q22.31	ENSG00000277152	50.45	lncRNA	6721		1		1	1						0.56125	0.07718	0.40997	0.71253	0.79356	0.42745
ENSG00000203601	-	long intergenic non-protein coding RNA 970 [Source:HGNC Symbol;Acc:HGNC:48730]	chr1	168903905	169087005	-1	q24.2	LINC00970	39.68	lncRNA	1129		1		1	1						0.525	0.03188	0.46253	0.58747	0.78431	0.43286
ENSG00000253490	-	long intergenic non-protein coding RNA 2099 [Source:HGNC Symbol;Acc:HGNC:52953]	chr8	29748309	29798492	1	p12	LINC02099	41.94	lncRNA	5541		1		1	1						0.455	0.05762	0.34206	0.56794	-0.78091	0.43485
ENSG00000235790	-	PEF1 and COL16A1 antisense RNA 1 [Source:HGNC Symbol;Acc:HGNC:40154]	chr1	31644049	31660162	1	p35.2	PEF1-AS1	50.48	lncRNA	2216			1	1	1						0.4425	0.07438	0.29673	0.58827	-0.7731	0.43946
ENSG00000223749	[251]	MIR503 host gene [Source:HGNC Symbol;Acc:HGNC:28258]	chrX	134543119	134546642	-1	q26.3	MIR503HG	52.61	lncRNA	3003		1		1	1						0.44062	0.07706	0.2896	0.59165	-0.77055	0.44098
ENSG00000235875	-	ARHGEF7 antisense RNA 2 [Source:HGNC Symbol;Acc:HGNC:40717]	chr13	111113812	111115678	-1	q34	ARHGEF7-AS2	60.85	lncRNA	1239		1		1	1						0.52437	0.03179	0.46206	0.58669	0.76667	0.44328
ENSG00000254192	-	novel transcript	chr5	168654513	168667761	1	q34	ENSG00000254192	46.52	lncRNA	810			1	1	1						0.55375	0.07123	0.41414	0.69336	0.75461	0.45049
ENSG00000278126	-	novel transcript	chr12	51201684	51202581	-1	q13.13	ENSG00000278126	43.43	lncRNA	898		1		1	1						0.56125	0.0819	0.40074	0.72176	0.74789	0.45452
ENSG00000255081	-	novel transcript	chr11	75914201	75915213	1	q13.5	ENSG00000255081	45.8	lncRNA	471		1		1	1						0.52312	0.03169	0.46101	0.58524	0.72972	0.46556
ENSG00000261504	-	long intergenic non-protein coding RNA 1686 [Source:HGNC Symbol;Acc:HGNC:27643]	chr1	182615254	182616629	1	q25.3	LINC01686	52.03	lncRNA	1376		1		1	1						0.555	0.07557	0.40688	0.70312	0.72777	0.46675
ENSG00000267013	-	long intergenic non-protein coding RNA 1929 [Source:HGNC Symbol;Acc:HGNC:52751]	chr18	55105904	55124306	-1	q21.2	LINC01929	40.22	lncRNA	3254			1	1	1						0.46813	0.04387	0.38214	0.55411	-0.72653	0.46752
ENSG00000245598	-	DACT3 antisense RNA 1 [Source:HGNC Symbol;Acc:HGNC:44120]	chr19	46660364	46677447	1	q13.32	DACT3-AS1	50.04	lncRNA	1825		1		1	1						0.555	0.07607	0.4059	0.7041	0.723	0.46968
ENSG00000262380	-	novel transcript, sense to NDE1	chr16	15683290	15684570	1	p13.11	ENSG00000262380	48.01	lncRNA	503		1		1	1						0.45062	0.06949	0.31443	0.58682	-0.71055	0.47736
ENSG00000255644	-	novel transcript	chr12	21759980	21766705	1	p12.1	ENSG00000255644	40.07	lncRNA	456			1	1	1						0.5325	0.04576	0.44282	0.62218	0.71028	0.47753
ENSG00000223478	-	novel transcript	chr9	128724445	128733194	1	q34.11	ENSG00000223478	53.85	lncRNA	544	1			1	1						0.445	0.07809	0.29194	0.59806	-0.7043	0.48124
ENSG00000255390	-	DCHS1 antisense RNA 1 [Source:HGNC Symbol;Acc:HGNC:40650]	chr11	6621451	6622322	1	p15.4	DCHS1-AS1	63.07	lncRNA	820			1	1	1						0.555	0.07981	0.39858	0.71142	0.68918	0.49071
ENSG00000270069	-	miR222/221 cluster host gene [Source:HGNC Symbol;Acc:HGNC:49555]	chrX	45745211	45770274	-1	p11.3	MIR222HG	37.99	lncRNA	2785		1		1	1						0.44562	0.07926	0.29028	0.60097	-0.68603	0.49269
ENSG00000273179	-	novel transcript, antisense to SPON2	chr4	1167778	1168174	1	p16.3	ENSG00000273179	56.42	lncRNA	397			1	1	1						0.55125	0.07471	0.40482	0.69768	0.68599	0.49272
ENSG00000249388	-	novel transcript	chr12	54081736	54102699	1	q13.13	ENSG00000249388	48.56	lncRNA	1659		1		1	1						0.45938	0.06095	0.33992	0.57883	-0.66655	0.50506
ENSG00000255197	-	novel transcript	chr11	47381509	47409369	-1	p11.2	ENSG00000255197	53.3	lncRNA	2931		1		1	1						0.44875	0.07748	0.29689	0.60061	-0.66144	0.50833
ENSG00000189419	[239]	spermatogenesis associated 41 [Source:HGNC Symbol;Acc:HGNC:48613]	chr15	100344047	100350725	-1	q26.3	SPATA41	47.37	lncRNA	5783		1		1	1						0.44875	0.07809	0.2957	0.6018	-0.6563	0.51163
ENSG00000249406	-	novel transcript	chr17	50199876	50215922	1	q21.33	ENSG00000249406	54.8	lncRNA	2604			1	1	1						0.45125	0.07506	0.30413	0.59837	-0.64947	0.51603
ENSG00000265206	-	novel transcript, MIR142 host	chr17	58330884	58332508	-1	q22	ENSG00000265206	63.57	lncRNA	1625		1		1	1						0.55	0.07743	0.39824	0.70176	0.64574	0.51845
ENSG00000273669	-	novel transcript	chr18	75073543	75074205	1	q22.3	ENSG00000273669	54.45	lncRNA	663		1		1	1						0.54813	0.07778	0.39569	0.70056	0.61876	0.53607
ENSG00000279078	-	SND1 intronic transcript 1 [Source:HGNC Symbol;Acc:HGNC:24158]	chr7	127997597	128000077	1	q32.1	SND1-IT1	43.69	lncRNA	2481			1	1	1						0.54812	0.07815	0.39495	0.7013	0.61577	0.53804
ENSG00000259062	[34]	ACTN1 antisense RNA 1 [Source:HGNC Symbol;Acc:HGNC:20131]	chr14	68979682	68987463	1	q24.1	ACTN1-AS1	47.31	lncRNA	936		1		1	1						0.45438	0.07738	0.30271	0.60604	-0.58962	0.55544
ENSG00000196756	[252]	small nucleolar RNA host gene 17 [Source:HGNC Symbol;Acc:HGNC:48600]	chr20	38419638	38435409	-1	q11.23	SNHG17	51.19	lncRNA	11824			1	1	1						0.54688	0.07967	0.39072	0.70303	0.58835	0.5563
ENSG00000231133	-	highly accelerated region 1B [Source:HGNC Symbol;Acc:HGNC:33118]	chr20	63090806	63102631	-1	q13.33	HAR1B	58.01	lncRNA	5154		1		1	1						0.46062	0.06733	0.32866	0.59259	-0.58478	0.55869
ENSG00000260550	-	novel transcript	chr16	18570448	18571683	-1	p12.3	ENSG00000260550	60.11	lncRNA	699			1	1	1						0.53562	0.06214	0.41383	0.65742	0.57329	0.56645
ENSG00000231806	-	prostate cancer associated transcript 7 [Source:HGNC Symbol;Acc:HGNC:48824]	chr9	94555054	94603990	1	q22.32	PCAT7	45.6	lncRNA	5904		1		1	1						0.545	0.07881	0.39054	0.69946	0.571	0.568
ENSG00000224729	[215]	PCOLCE antisense RNA 1 [Source:HGNC Symbol;Acc:HGNC:40430]	chr7	100589402	100604206	-1	q22.1	PCOLCE-AS1	54.1	lncRNA	3265			1	1	1						0.54438	0.07931	0.38894	0.69981	0.55954	0.57579
ENSG00000246985	-	SOCS2 antisense RNA 1 [Source:HGNC Symbol;Acc:HGNC:27054]	chr12	93542022	93571768	-1	q22	SOCS2-AS1	42.95	lncRNA	4441		1		1	1						0.45562	0.08054	0.29777	0.61348	-0.55097	0.58165
ENSG00000228956	-	SATB1 antisense RNA 1 [Source:HGNC Symbol;Acc:HGNC:50687]	chr3	18445024	18923280	1	p24.3	SATB1-AS1	37.1	lncRNA	16456		1		1	1						0.54188	0.07776	0.38946	0.69429	0.53849	0.59024
ENSG00000272990	-	novel transcript, antisense to KCNAB1	chr3	156523740	156524247	-1	q25.31	ENSG00000272990	38.19	lncRNA	508		1		1	1						0.54125	0.07731	0.38973	0.69277	0.5336	0.59362
ENSG00000278107	-	novel transcript	chr18	76805151	76805736	-1	q23	ENSG00000278107	46.93	lncRNA	586		1		1	1						0.54062	0.07787	0.38801	0.69324	0.52173	0.60186
ENSG00000269220	-	long intergenic non-protein coding RNA 528 [Source:HGNC Symbol;Acc:HGNC:26875]	chr22	17777322	17779481	1	q11.21	LINC00528	54.86	lncRNA	2160		1		1	1						0.54062	0.07806	0.38764	0.69361	0.52045	0.60275
ENSG00000226445	-	novel transcript	chr6	169213254	169245773	1	q27	ENSG00000226445	50.6	lncRNA	5767			1	1	1						0.54062	0.07962	0.38458	0.69667	0.51027	0.60986
ENSG00000263394	-	novel transcript	chr17	19091069	19091825	-1	p11.2	ENSG00000263394	52.44	lncRNA	757		1		1	1						0.46563	0.06751	0.33331	0.59794	-0.50918	0.61062
ENSG00000261276	-	novel transcript, antisense to MRGPRF	chr11	69004394	69005100	1	q13.3	ENSG00000261276	56.29	lncRNA	366			1	1	1						0.47938	0.04093	0.39915	0.5596	-0.50387	0.61435
ENSG00000272512	-	novel transcript	chr1	995966	998051	-1	p36.33	ENSG00000272512	66.16	lncRNA	2086		1		1	1						0.5425	0.08437	0.37714	0.70786	0.50375	0.61444
ENSG00000260996	-	novel transcript, overlapping NRARP	chr9	137293868	137295721	-1	q34.3	ENSG00000260996	61.54	lncRNA	1854		1		1	1						0.46	0.07994	0.30332	0.61668	-0.50037	0.61681
ENSG00000174680	-	GRIK1 antisense RNA 1 [Source:HGNC Symbol;Acc:HGNC:16458]	chr21	29748175	29764002	1	q21.3	GRIK1-AS1	40.42	lncRNA	4605		1		1	1						0.53625	0.07665	0.38602	0.68648	0.47295	0.63625
ENSG00000256040	-	PAPPA antisense RNA 1 [Source:HGNC Symbol;Acc:HGNC:35152]	chr9	116398157	116400606	-1	q33.1	PAPPA-AS1	39.47	lncRNA	2450		1		1	1						0.53688	0.07914	0.38177	0.69198	0.46597	0.64124
ENSG00000259627	-	novel transcript, antisense to TPM1	chr15	63070025	63071911	-1	q22.2	ENSG00000259627	39.75	lncRNA	691			1	1	1						0.46313	0.07971	0.3069	0.61935	-0.46264	0.64362
ENSG00000267287	-	novel transcript	chr18	79576460	79589010	1	q23	ENSG00000267287	59.04	lncRNA	6158		1		1	1						0.53438	0.07517	0.38704	0.68171	0.4573	0.64746
ENSG00000274565	-	novel transcript	chr17	62626437	62627590	-1	q23.2	ENSG00000274565	59.01	lncRNA	1154		1		1	1						0.53563	0.07843	0.3819	0.68935	0.45421	0.64968
ENSG00000277701	-	novel transcript	chr2	97281356	97291849	1	q11.2	ENSG00000277701	39.3	lncRNA	4777			1	1	1						0.53625	0.08336	0.37286	0.69964	0.43485	0.66367
ENSG00000225826	-	long intergenic non-protein coding RNA 626 [Source:HGNC Symbol;Acc:HGNC:44257]	chr1	168784012	168792886	1	q24.2	LINC00626	39.12	lncRNA	1532		1		1	1						0.52875	0.06687	0.39769	0.65981	0.42994	0.66724
ENSG00000267705	-	novel transcript	chr18	58752179	58753898	-1	q21.32	ENSG00000267705	40.52	lncRNA	625			1	1	1						0.4875	0.02937	0.42993	0.54507	-0.42559	0.67041
ENSG00000273338	-	novel transcript, antisense to DNAJB4	chr1	78004346	78004554	-1	p31.1	ENSG00000273338	28.71	lncRNA	209		1		1	1						0.46687	0.07839	0.31324	0.62051	-0.42259	0.6726
ENSG00000229989	-	MIR181A1 host gene [Source:HGNC Symbol;Acc:HGNC:48659]	chr1	198777861	198937471	-1	q32.1	MIR181A1HG	35.36	lncRNA	5391		1		1	1						0.4675	0.07796	0.31471	0.62029	-0.4169	0.67675
ENSG00000281404	-	long intergenic non-protein coding RNA 1176 [Source:HGNC Symbol;Acc:HGNC:49548]	chr7	30390885	30412375	1	p14.3	LINC01176	38.81	lncRNA	5096		1		1	1						0.46812	0.07786	0.31553	0.62072	-0.4094	0.68225
ENSG00000270412	-	novel transcript, antisense to COL15A1	chr9	98943337	98943775	-1	q22.33	ENSG00000270412	56.95	lncRNA	439		1		1	1						0.48812	0.02945	0.43041	0.54584	-0.40325	0.68677
ENSG00000267519	-	miR-23a/27a/24-2 cluster host gene [Source:HGNC Symbol;Acc:HGNC:27620]	chr19	13823880	13842928	-1	p13.12	MIR23AHG	57.53	lncRNA	19049		1		1	1						0.4675	0.081	0.30874	0.62626	-0.40122	0.68826
ENSG00000229276	-	REV3L intronic transcript 1 [Source:HGNC Symbol;Acc:HGNC:41377]	chr6	111360641	111361607	-1	q21	REV3L-IT1	37.95	lncRNA	382		1		1	1						0.51688	0.04271	0.43316	0.60059	0.3951	0.69277
ENSG00000177133	-	PRDM16 divergent transcript [Source:HGNC Symbol;Acc:HGNC:48664]	chr1	3059615	3068437	-1	p36.32	PRDM16-DT	61.79	lncRNA	5600		1		1	1						0.4725	0.06967	0.33594	0.60906	-0.39471	0.69306
ENSG00000240801	-	novel transcript, 3' overlapping ncRNA IGF2	chr11	2129121	2129964	-1	p15.5	ENSG00000240801	61.14	lncRNA	373	1			1	1						0.53063	0.07937	0.37507	0.68618	0.38586	0.6996
ENSG00000262185	-	long intergenic non-protein coding RNA 2861 [Source:HGNC Symbol;Acc:HGNC:54406]	chr16	3930806	3950586	-1	p13.3	LINC02861	47.42	lncRNA	2721		1		1	1						0.53	0.0783	0.37654	0.68346	0.38315	0.70161
ENSG00000262434	-	novel transcript, antisense to RNMTL1	chr17	789744	790525	-1	p13.3	ENSG00000262434	54.99	lncRNA	486		1		1	1						0.52938	0.0769	0.37865	0.6801	0.38199	0.70247
ENSG00000270164	-	long intergenic non-protein coding RNA 1480 [Source:HGNC Symbol;Acc:HGNC:51124]	chr19	41535183	41536904	1	q13.2	LINC01480	40.77	lncRNA	1722		1		1	1						0.52875	0.07584	0.38011	0.67739	0.37909	0.70462
ENSG00000234771	-	SLC25A25 antisense RNA 1 [Source:HGNC Symbol;Acc:HGNC:27844]	chr9	128108581	128118693	-1	q34.11	SLC25A25-AS1	53.53	lncRNA	6391		1		1	1						0.53	0.07927	0.37463	0.68537	0.37845	0.70509
ENSG00000125462	-	MIR9-1 host gene [Source:HGNC Symbol;Acc:HGNC:30780]	chr1	156404250	156456763	-1	q22	MIR9-1HG	49.17	lncRNA	13742		1		1	1						0.47	0.08031	0.31259	0.62741	-0.37354	0.70875
ENSG00000245164	[253]	long intergenic non-protein coding RNA 861 [Source:HGNC Symbol;Acc:HGNC:45133]	chr8	125859721	126292788	-1	q24.13	LINC00861	37.75	lncRNA	8758		1		1	1						0.47187	0.07625	0.32242	0.62133	-0.36883	0.71225
ENSG00000246095	[247]	long intergenic non-protein coding RNA 1096 [Source:HGNC Symbol;Acc:HGNC:27739]	chr4	13546075	13547801	-1	p15.33	LINC01096	55.01	lncRNA	1264		1		1	1						0.4725	0.07556	0.3244	0.6206	-0.36393	0.71591
ENSG00000267121	-	FMNL1 divergent transcript [Source:HGNC Symbol;Acc:HGNC:55311]	chr17	45190931	45222222	-1	q21.31	FMNL1-DT	48.52	lncRNA	3894		1		1	1						0.47125	0.0796	0.31524	0.62726	-0.3612	0.71795
ENSG00000204044	-	SLC12A5 and MMP9 antisense RNA 1 [Source:HGNC Symbol;Acc:HGNC:53143]	chr20	46013500	46022073	-1	q13.12	SLC12A5-AS1	50.06	lncRNA	2244			1	1	1						0.4725	0.0786	0.31845	0.62655	-0.34988	0.72643
ENSG00000254680	-	novel transcript	chr11	12261426	12263173	-1	p15.3	ENSG00000254680	48.51	lncRNA	500			1	1	1						0.47125	0.08367	0.30727	0.63523	-0.34362	0.73113
ENSG00000251002	-	novel transcript, antisense to IG_gene_cluster	chr14	22197446	22482959	-1	q11.2	ENSG00000251002	40.42	lncRNA	9092		1		1	1						0.47375	0.07796	0.32095	0.62655	-0.33672	0.73633
ENSG00000242611	-	novel transcript	chr7	77038	81178	1	p22.3	ENSG00000242611	56.92	lncRNA	1365		1		1	1						0.47812	0.06838	0.3441	0.61215	-0.3199	0.74905
ENSG00000228079	-	novel transcript	chr2	64086353	64088246	-1	p14	ENSG00000228079	39.55	lncRNA	560		1		1	1						0.51938	0.06119	0.39945	0.6393	0.31666	0.7515
ENSG00000238121	-	long intergenic non-protein coding RNA 426 [Source:HGNC Symbol;Acc:HGNC:42761]	chr13	30340267	30377145	-1	q12.3	LINC00426	44.99	lncRNA	4873		1		1	1						0.47625	0.07631	0.32668	0.62582	-0.31123	0.75563
ENSG00000256039	-	long intergenic non-protein coding RNA 2446 [Source:HGNC Symbol;Acc:HGNC:53378]	chr12	10553362	10572688	1	p13.2	LINC02446	37.08	lncRNA	1320		1		1	1						0.48062	0.06489	0.35344	0.60781	-0.29857	0.76526
ENSG00000274248	-	novel transcript	chr21	45974489	45974953	1	q22.3	ENSG00000274248	63.23	lncRNA	465		1		1	1						0.52062	0.0711	0.38127	0.65998	0.29009	0.77175
ENSG00000280145	-	novel transcript	chr21	6630182	6670695	-1	p12	ENSG00000280145	38.94	lncRNA	7492			1	1	1						0.5225	0.07836	0.36892	0.67608	0.28715	0.774
ENSG00000275431	-	novel transcript, antisense to CCL14	chr17	35983656	35990270	1	q12	ENSG00000275431	46.21	lncRNA	3952			1	1	1						0.48688	0.04725	0.39428	0.57947	-0.2778	0.78116
ENSG00000260552	-	cell fate and sterol metabolism associated divergent transcript of MOCOS [Source:HGNC Symbol;Acc:HGNC:51610]	chr18	36179996	36187448	-1	q12.2	COSMOC	52.07	lncRNA	609			1	1	1						0.52125	0.07925	0.36593	0.67657	0.26815	0.78858
ENSG00000281453	-	TGFB2 overlapping transcript 1 [Source:HGNC Symbol;Acc:HGNC:50629]	chr1	218442626	218443996	1	q41	TGFB2-OT1	32.75	lncRNA	1371			1	1	1						0.47938	0.07774	0.327	0.63175	-0.26529	0.79078
ENSG00000232814	-	COL4A2 antisense RNA 1 [Source:HGNC Symbol;Acc:HGNC:40156]	chr13	110502575	110508179	-1	q34	COL4A2-AS1	56.32	lncRNA	540			1	1	1						0.51875	0.07528	0.37121	0.66629	0.24908	0.8033
ENSG00000262877	-	novel transcript	chr17	81388126	81390319	-1	q25.3	ENSG00000262877	61.39	lncRNA	1628		1		1	1						0.47938	0.08281	0.31708	0.64167	-0.24908	0.8033
ENSG00000275871	-	novel transcript	chr5	149425771	149428289	-1	q32	ENSG00000275871	50.5	lncRNA	422			1	1	1						0.49062	0.03788	0.41638	0.56487	-0.24747	0.80454
ENSG00000267359	-	novel transcript, antisense SLFN14	chr17	35553205	35554767	1	q12	ENSG00000267359	39.54	lncRNA	457		1		1	1						0.49062	0.03788	0.41638	0.56487	-0.24747	0.80454
ENSG00000251259	-	novel transcript	chr4	105137280	105140619	-1	q24	ENSG00000251259	34.91	lncRNA	549			1	1	1						0.48063	0.07854	0.32668	0.63457	-0.24667	0.80516
ENSG00000229051	-	long intergenic non-protein coding RNA 1788 [Source:HGNC Symbol;Acc:HGNC:52577]	chr1	70706441	70786468	1	p31.1	LINC01788	38.03	lncRNA	2455		1		1	1						0.5125	0.05216	0.41026	0.61474	0.23963	0.81062
ENSG00000268460	-	novel transcript	chr19	46201552	46214838	1	q13.32	ENSG00000268460	50.1	lncRNA	7133		1		1	1						0.51812	0.07825	0.36475	0.6715	0.23162	0.81684
ENSG00000261346	-	novel transcript, antisense to ITGAL	chr16	30477180	30489353	-1	p11.2	ENSG00000261346	49.45	lncRNA	699	1			1	1						0.50813	0.03516	0.4392	0.57705	0.23106	0.81727
ENSG00000227373	-	RABGAP1L divergent transcript [Source:HGNC Symbol;Acc:HGNC:54296]	chr1	174110268	174160165	-1	q25.1	RABGAP1L-DT	40.43	lncRNA	7845		1		1	1						0.4825	0.07892	0.32782	0.63718	-0.22174	0.82452
ENSG00000272839	-	novel transcript, antisense to PTPRN2	chr7	157868538	157869154	1	q36.3	ENSG00000272839	49.27	lncRNA	617		1		1	1						0.5075	0.03509	0.43872	0.57628	0.21373	0.83076
ENSG00000242268	-	long intergenic non-protein coding RNA 2082 [Source:HGNC Symbol;Acc:HGNC:52931]	chr3	168902194	168924590	1	q26.2	LINC02082	35.02	lncRNA	2750		1		1	1						0.48375	0.0761	0.33459	0.63291	-0.21352	0.83092
ENSG00000267100	-	ILF3 divergent transcript [Source:HGNC Symbol;Acc:HGNC:27115]	chr19	10651862	10653844	-1	p13.2	ILF3-DT	51.64	lncRNA	1983	1			1	1						0.48562	0.07871	0.33135	0.6399	-0.18263	0.85509
ENSG00000255367	-	novel transcript	chr11	3481520	3581211	-1	p15.4	ENSG00000255367	45.21	lncRNA	1377		1		1	1						0.51375	0.07631	0.36418	0.66332	0.18018	0.85701
ENSG00000203635	-	novel transcript	chr2	1620510	1625419	-1	p25.3	ENSG00000203635	50.33	lncRNA	1641		1		1	1						0.51375	0.07734	0.36216	0.66534	0.17778	0.85889
ENSG00000256185	-	novel transcript	chr12	26335864	26336950	-1	p11.23	ENSG00000256185	36.43	lncRNA	172			1	1	1						0.50438	0.02538	0.45463	0.55412	0.17238	0.86314
ENSG00000260135	-	MMP2 antisense RNA 1 [Source:HGNC Symbol;Acc:HGNC:53142]	chr16	55426797	55462297	-1	q12.2	MMP2-AS1	44.19	lncRNA	2202		1		1	1						0.50438	0.02538	0.45463	0.55412	0.17238	0.86314
ENSG00000256576	-	long intergenic non-protein coding RNA 2361 [Source:HGNC Symbol;Acc:HGNC:53283]	chr12	132186735	132189695	-1	q24.33	LINC02361	63.26	lncRNA	1484		1		1	1						0.48625	0.08086	0.32777	0.64473	-0.17005	0.86497
ENSG00000225670	-	CADM3 antisense RNA 1 [Source:HGNC Symbol;Acc:HGNC:40812]	chr1	159194325	159207973	-1	q23.2	CADM3-AS1	50.67	lncRNA	5208		1		1	1						0.48875	0.06915	0.35322	0.62428	-0.16269	0.87076
ENSG00000254510	-	novel transcript	chr11	66409158	66417137	1	q13.2	ENSG00000254510	53.5	lncRNA	1375		1		1	1						0.51062	0.06703	0.37924	0.64201	0.1585	0.87406
ENSG00000254337	-	novel transcript	chr8	68848737	68852763	-1	q13.2	ENSG00000254337	38.89	lncRNA	872		1		1	1						0.51062	0.06875	0.37587	0.64538	0.15453	0.87719
ENSG00000273007	-	novel transcript, antisense to FGF2	chr4	122879778	122885805	-1	q28.1	ENSG00000273007	40.36	lncRNA	2849		1		1	1						0.51188	0.07928	0.35649	0.66726	0.14979	0.88093
ENSG00000265800	-	novel transcript, sense intronic to HN1	chr17	75138416	75141350	-1	q25.1	ENSG00000265800	43.68	lncRNA	400		1		1	1						0.48812	0.08055	0.33026	0.64599	-0.14743	0.88279
ENSG00000236234	-	novel transcript, antisense to PLEKHM1	chr17	45452844	45464065	1	q21.31	ENSG00000236234	51.33	lncRNA	769			1	1	1						0.49188	0.05563	0.38284	0.60091	-0.14606	0.88388
ENSG00000261759	-	novel transcript, antisense to ITPRIPL2	chr16	19119976	19121629	-1	p12.3	ENSG00000261759	43.17	lncRNA	1137			1	1	1						0.48813	0.0814	0.32858	0.64767	-0.14588	0.88401
ENSG00000228401	-	novel transcript, antisense to EGFL7 (HSPC324)	chr9	136647872	136660421	-1	q34.3	ENSG00000228401	57.52	lncRNA	1362		1		1	1						0.49125	0.0603	0.37305	0.60945	-0.1451	0.88464
ENSG00000259354	-	novel transcript, antisense to SLC30A4	chr15	45448427	45513767	1	q21.1	ENSG00000259354	42.38	lncRNA	3886		1		1	1						0.48875	0.07781	0.33624	0.64126	-0.14458	0.88504
ENSG00000229116	-	novel transcript	chr10	44282489	44293998	-1	q11.21	ENSG00000229116	41.8	lncRNA	3052		1		1	1						0.50813	0.05774	0.39496	0.62129	0.14073	0.88809
ENSG00000260816	-	novel transcript, sense intronic to WWOX	chr16	78895361	78899644	1	q23.1	ENSG00000260816	34.83	lncRNA	4284		1		1	1						0.49	0.07666	0.33975	0.64025	-0.13045	0.89621
ENSG00000283440	-	long intergenic non-protein coding RNA 1260 [Source:HGNC Symbol;Acc:HGNC:49900]	chr20	44656451	44663498	-1	q13.12	LINC01260	48.51	lncRNA	1001			1	1	1						0.51	0.07714	0.3588	0.6612	0.12963	0.89686
ENSG00000235865	-	GSN antisense RNA 1 [Source:HGNC Symbol;Acc:HGNC:23372]	chr9	121280768	121285530	-1	q33.2	GSN-AS1	52.28	lncRNA	4763		1		1	1						0.51062	0.08287	0.34821	0.67304	0.12822	0.89797
ENSG00000234546	-	long non coding transcriptional activator of miR34a [Source:HGNC Symbol;Acc:HGNC:52548]	chr1	9182004	9196284	1	p36.22	LNCTAM34A	51.64	lncRNA	2141		1		1	1						0.49	0.07895	0.33527	0.64473	-0.12667	0.8992
ENSG00000260892	-	novel transcript, antisense to CSPG4	chr15	75676227	75677162	1	q24.2	ENSG00000260892	66.35	lncRNA	563			1	1	1						0.49125	0.07887	0.33668	0.64582	-0.11095	0.91166
ENSG00000262202	-	novel transcript	chr17	19112000	19112636	-1	p11.2	ENSG00000262202	56.2	lncRNA	637	1			1	1						0.50813	0.07891	0.35346	0.66279	0.10296	0.91799
ENSG00000272343	-	novel transcript	chr8	56222688	56223173	1	q12.1	ENSG00000272343	33.54	lncRNA	486			1	1	1						0.4925	0.07791	0.33981	0.64519	-0.09627	0.92331
ENSG00000230630	[254]	DNM3 opposite strand/antisense RNA [Source:HGNC Symbol;Acc:HGNC:41228]	chr1	172138397	172144840	-1	q24.3	DNM3OS	33.66	lncRNA	3195		1		1	1						0.5075	0.07798	0.35466	0.66034	0.09617	0.92338
ENSG00000260630	-	SNAI3 antisense RNA 1 [Source:HGNC Symbol;Acc:HGNC:28327]	chr16	88663298	88687278	1	q24.2	SNAI3-AS1	55.31	lncRNA	6102		1		1	1						0.4925	0.07879	0.33808	0.64692	-0.09519	0.92416
ENSG00000278722	-	novel transcript, antisense to PCDH17	chr13	57632759	57633575	-1	q21.1	ENSG00000278722	60.71	lncRNA	654			1	1	1						0.495	0.05608	0.38509	0.60491	-0.08916	0.92895
ENSG00000267583	-	novel transcript	chr18	35443869	35467088	-1	q12.2	ENSG00000267583	43.31	lncRNA	916		1		1	1						0.49438	0.0698	0.35758	0.63117	-0.08059	0.93577
ENSG00000254202	-	novel transcript	chr8	83912713	84142463	1	q21.2	ENSG00000254202	35.34	lncRNA	3102		1		1	1						0.50375	0.0539	0.39811	0.60939	0.06957	0.94453
ENSG00000264215	-	novel transcript	chr17	20788071	20789584	1	p11.2	ENSG00000264215	41.88	lncRNA	1514			1	1	1						0.4975	0.04452	0.41024	0.58476	-0.05615	0.95522
ENSG00000225194	[255]	long intergenic non-protein coding RNA 92 [Source:HGNC Symbol;Acc:HGNC:31408]	chr9	96019724	96027993	-1	q22.32	LINC00092	56.63	lncRNA	4849			1	1	1						0.49562	0.07794	0.34286	0.64839	-0.05613	0.95524
ENSG00000260244	-	novel transcript, overlapping GUCY1A3	chr4	155734448	155737062	1	q32.1	ENSG00000260244	34.57	lncRNA	2615			1	1	1						0.49563	0.07973	0.33936	0.65189	-0.05487	0.95624
ENSG00000223485	-	long intergenic non-protein coding RNA 1615 [Source:HGNC Symbol;Acc:HGNC:51898]	chr6	169157162	169162992	-1	q27	LINC01615	53.88	lncRNA	2243		1		1	1						0.50375	0.07291	0.36085	0.64665	0.05144	0.95898
ENSG00000249378	-	long intergenic non-protein coding RNA 1060 [Source:HGNC Symbol;Acc:HGNC:49081]	chr4	188400736	188681051	1	q35.2	LINC01060	39.05	lncRNA	5926		1		1	1						0.50375	0.07599	0.35482	0.65268	0.04935	0.96064
ENSG00000261625	-	novel transcript, overlapping to MRGPRF	chr11	69000765	69002048	-1	q13.3	ENSG00000261625	53.58	lncRNA	1284		1		1	1						0.50313	0.06976	0.3664	0.63985	0.0448	0.96427
ENSG00000246627	-	CACNA1C antisense RNA 1 [Source:HGNC Symbol;Acc:HGNC:40119]	chr12	2676001	2691200	-1	p13.33	CACNA1C-AS1	54.44	lncRNA	2639			1	1	1						0.50187	0.07471	0.35545	0.6483	0.0251	0.97998
ENSG00000224086	-	PPM1F antisense RNA 1 [Source:HGNC Symbol;Acc:HGNC:40888]	chr22	21938269	21977632	1	q11.22	PPM1F-AS1	55.44	lncRNA	37876		1		1	1						0.50125	0.08119	0.34213	0.66037	0.0154	0.98772
ENSG00000222022	-	novel transcript	chr2	237421420	237425276	-1	q37.3	ENSG00000222022	44.62	lncRNA	588		1		1	1						0.49938	0.04483	0.41151	0.58724	-0.01394	0.98888
ENSG00000229775	-	long intergenic non-protein coding RNA 2624 [Source:HGNC Symbol;Acc:HGNC:54103]	chr10	106140143	106188722	1	q25.1	LINC02624	36.11	lncRNA	2541		1		1	1						0.5	0	0.5	0.5	NA	NA
ENSG00000250791	-	novel transcript	chr4	116489364	116515619	-1	q26	ENSG00000250791	33.84	lncRNA	596			1	1	1						0.5	0	0.5	0.5	NA	NA
ENSG00000258407	-	novel transcript, antisense to GPR65	chr14	88010787	88015611	-1	q31.3	ENSG00000258407	36.35	lncRNA	331	1			1	1						0.5	0	0.5	0.5	NA	NA
ENSG00000256721	-	CACNA1C intronic transcript 3 [Source:HGNC Symbol;Acc:HGNC:41314]	chr12	2269776	2288937	1	p13.33	CACNA1C-IT3	46.92	lncRNA	622		1		1	1						0.5	0	0.5	0.5	NA	NA
ENSG00000257180	-	novel transcript	chr16	6056975	6092954	1	p13.3	ENSG00000257180	41.44	lncRNA	776		1		1	1						0.5	0	0.5	0.5	NA	NA
ENSG00000236481	-	long intergenic non-protein coding RNA 2195 [Source:HGNC Symbol;Acc:HGNC:53058]	chr16	26584755	26594813	-1	p12.1	LINC02195	37.79	lncRNA	294		1		1	1						0.5	0	0.5	0.5	NA	NA
ENSG00000237797	-	macrophage enriched lincRNA repressor of IFN-gamma signaling [Source:HGNC Symbol;Acc:HGNC:53963]	chr10	31693084	31707388	-1	p11.22	MACORIS	47.72	lncRNA	347		1		1	1						0.5	0	0.5	0.5	NA	NA
ENSG00000291155	-	Cancer/testis associated transcript 75	chr2	222318471	222352989	1		CT75		lncRNA			1		1	1
ENSG00000290878	[256]	Major histocompatibility complex, class II, DR beta 6 (pseudogene)	chr6	32552713	32560022	-1		HLA-DRB6		lncRNA		1			1	1

## Sheet: Down
												Down					Up					DESeq2					ROC
	Previous references in EOC	Gene_description	Chromosome_scaffold_name	Gene_start_bp	Gene_end_bp	Strand	Karyotype_band	Gene_name	Gene_GC_content	Gene_type	Gene_Length	Asc_OV	Met_OV	Met_Asc	# comparisons	# studies	Asc_OV	Met_OV	Met_Asc	# comparisons	# studies	baseMean	log2FoldChange	lfcSE	pvalue	padj	AUC	SE.AUC	LowerLimit	UpperLimit	z	p-value
ENSG00000231160	-	KLF3 antisense RNA 1 [Source:HGNC Symbol;Acc:HGNC:25796]	chr4	38602438	38664914	-1	p14	KLF3-AS1	43.68	lncRNA	6454		1		1	1											0.565	0.07798	0.41217	0.71783	0.83356	0.40453
ENSG00000248309	-	MEF2C antisense RNA 1 [Source:HGNC Symbol;Acc:HGNC:48908]	chr5	88883328	89466398	1	q14.3	MEF2C-AS1	35.98	lncRNA	7865		1		1	1											0.53125	0.07718	0.37998	0.68252	0.40489	0.68556
ENSG00000247809	-	NR2F2 antisense RNA 1 [Source:HGNC Symbol;Acc:HGNC:44222]	chr15	96110040	96327361	-1	q26.2	NR2F2-AS1	40.51	lncRNA	10503		1		1	1											0.27375	0.06975	0.13704	0.41046	-3.24361	0.00118
ENSG00000262061	-	RPH3AL antisense RNA 1 [Source:HGNC Symbol;Acc:HGNC:55345]	chr17	331205	333488	1	p13.3	RPH3AL-AS1	56.26	lncRNA	2284		1		1	1											0.49688	0.07644	0.34705	0.6467	-0.04088	0.96739
ENSG00000244479	-	OR2A1 antisense RNA 1 [Source:HGNC Symbol;Acc:HGNC:49168]	chr7	144300395	144356181	-1	q35	OR2A1-AS1	41.47	lncRNA	2532		1		1	1											0.46688	0.07934	0.31137	0.62238	-0.41749	0.67632
ENSG00000145075	-	coiled-coil domain containing 39 [Source:HGNC Symbol;Acc:HGNC:25244]	chr3	180614008	180870933	-1	q26.33	CCDC39	37.08	lncRNA	4978		1		1	1											0.53188	0.05463	0.42479	0.63896	0.58343	0.55961
ENSG00000255495	-	novel transcript	chr8	12194467	12196280	1	p23.1	ENSG00000255495	54.36	lncRNA	1361		1		1	1											0.45688	0.03571	0.38688	0.52687	-1.20751	0.22723
ENSG00000259976	-	novel transcript	chr3	114314501	114329714	-1	q13.31	ENSG00000259976	37.39	lncRNA	15214		1		1	1											0.45875	0.07765	0.30656	0.61094	-0.53123	0.59526
ENSG00000248429	-	FAM198B antisense RNA 1 [Source:HGNC Symbol;Acc:HGNC:53132]	chr4	158170752	158202877	1	q32.1	FAM198B-AS1	38.86	lncRNA	5639		1		1	1											0.46312	0.07906	0.30818	0.61807	-0.46645	0.6409
ENSG00000248441	-	long intergenic non-protein coding RNA 1197 [Source:HGNC Symbol;Acc:HGNC:49597]	chr15	95186634	95327129	-1	q26.2	LINC01197	38.86	lncRNA	13970		1		1	1											0.51125	0.07262	0.36892	0.65358	0.15492	0.87688
ENSG00000258913	-	long intergenic non-protein coding RNA 2691 [Source:HGNC Symbol;Acc:HGNC:20358]	chr14	104223584	104288069	1	q32.33	LINC02691	53.02	lncRNA	2349		1		1	1											0.52875	0.0397	0.45095	0.60655	0.72425	0.46891
ENSG00000254141	-	novel transcript	chr8	105669991	105679031	1	q23.1	ENSG00000254141	33.81	lncRNA	716		1		1	1											0.53875	0.07633	0.38914	0.68836	0.50764	0.61171
ENSG00000259275	-	novel transcript	chr15	96354237	96405235	1	q26.2	ENSG00000259275	45.21	lncRNA	7083		1		1	1											0.3075	0.07257	0.16526	0.44974	-2.65246	0.00799
ENSG00000272894	-	MIOS divergent transcript [Source:HGNC Symbol;Acc:HGNC:55187]	chr7	7552462	7566996	-1	p21.3	MIOS-DT	41.47	lncRNA	1730		1		1	1											0.55375	0.07771	0.40143	0.70607	0.69164	0.48916
ENSG00000259905	-	Prader-Willi region non-protein coding RNA 1 [Source:HGNC Symbol;Acc:HGNC:33235]	chr15	24101827	24823365	1	q11.2	PWRN1	38.96	lncRNA	24226		1		1	1											0.53875	0.05076	0.43926	0.63824	0.76335	0.44525
ENSG00000244578	-	long intergenic non-protein coding RNA 1391 [Source:HGNC Symbol;Acc:HGNC:50666]	chr3	138935189	138944020	-1	q22.3	LINC01391	53.86	lncRNA	3889		1		1	1											0.43375	0.07842	0.28004	0.58746	-0.84478	0.39823
ENSG00000261292	-	novel transcript	chr3	97759523	97761532	1	q11.2	ENSG00000261292	31.04	lncRNA	2010		1		1	1											0.46813	0.07322	0.32462	0.61163	-0.43535	0.66331
ENSG00000235159	-	novel transcript	chr22	46067356	46069891	-1	q13.31	ENSG00000235159	41.72	lncRNA	867		1		1	1											0.39938	0.07775	0.24699	0.55176	-1.29426	0.19558
ENSG00000240875	[187]	long intergenic non-protein coding RNA 886 [Source:HGNC Symbol;Acc:HGNC:48572]	chr3	156747343	156817062	-1	q25.31	LINC00886	39.71	lncRNA	3961		1		1	1											0.51688	0.07844	0.36314	0.67061	0.21515	0.82965
ENSG00000291115	[43]	Zinc finger protein 300 pseudogene 1	chr5	150930456	150946598	-1		ZNF300P1		lncRNA		1			1	1
ENSG00000241684	[180]	ADAMTS9 antisense RNA 2 [Source:HGNC Symbol;Acc:HGNC:42435]	chr3	64684909	65053439	1	p14.1	ADAMTS9-AS2	39.79	lncRNA	8246		1		1	1											0.51188	0.07921	0.35664	0.66711	0.14993	0.88082
ENSG00000180769	[188]	WDFY3 antisense RNA 2 [Source:HGNC Symbol;Acc:HGNC:21603]	chr4	84965534	85011277	1	q21.23	WDFY3-AS2	38.3	lncRNA	9357		1		1	1											0.49	0.0792	0.33476	0.64524	-0.12626	0.89953
ENSG00000250490	[192]	long intergenic non-protein coding RNA 2145 [Source:HGNC Symbol;Acc:HGNC:53005]	chr5	6310441	6339884	-1	p15.31	LINC02145	46.89	lncRNA	2923		1		1	1											0.47938	0.0691	0.34394	0.61481	-0.29848	0.76534
ENSG00000236404	[182]	VLDLR antisense RNA 1 [Source:HGNC Symbol;Acc:HGNC:49621]	chr9	2421597	2622457	-1	p24.2	VLDLR-AS1	39.69	lncRNA	6211		1		1	1											0.48125	0.07984	0.32477	0.63773	-0.23484	0.81433
ENSG00000243701	[185]	DPPA2 upstream binding RNA [Source:HGNC Symbol;Acc:HGNC:48569]	chr3	107220744	107348464	1	q13.12	DUBR	38.76	lncRNA	15322		1		1	1											0.37312	0.0759	0.22436	0.52189	-1.67153	0.09462
ENSG00000230937	-	MIR205 host gene [Source:HGNC Symbol;Acc:HGNC:43562]	chr1	209428817	209432838	1	q32.2	MIR205HG	47.91	lncRNA	3523		1		1	1											0.54312	0.07918	0.38794	0.69831	0.54465	0.58599
ENSG00000240859	-	novel transcript	chr7	149549	155465	1	p22.3	ENSG00000240859	51.41	lncRNA	5197		1		1	1											0.52188	0.07943	0.3662	0.67755	0.2754	0.78301
ENSG00000272142	-	LYRM4 antisense RNA 1 [Source:NCBI gene (formerly Entrezgene);Acc:100129461]	chr6	5003774	5045666	1	p25.1	LYRM4-AS1	45.44	lncRNA	4662		1		1	1											0.5	0.07172	0.35944	0.64056	0	1
ENSG00000227210	-	novel transcript	chr2	19990209	20004795	1	p24.1	ENSG00000227210	39.65	lncRNA	3852		1		1	1											0.585	0.07876	0.43063	0.73937	1.07918	0.28051
ENSG00000267665	-	novel transcript	chr17	77516887	77536601	1	q25.3	ENSG00000267665	49.89	lncRNA	7507		1		1	1											0.50438	0.077	0.35345	0.6553	0.05681	0.95469
ENSG00000228952	-	long intergenic non-protein coding RNA 2041 [Source:HGNC Symbol;Acc:HGNC:52881]	chr3	187448845	187449450	1	q27.3	LINC02041	37.13	lncRNA	246		1		1	1											0.58625	0.06871	0.45159	0.72091	1.25531	0.20936
ENSG00000204682	-	MIR1915 host gene [Source:HGNC Symbol;Acc:HGNC:31448]	chr10	21492658	21497260	-1	p12.31	MIR1915HG	57.38	lncRNA	3799		1		1	1											0.43	0.07931	0.27455	0.58545	-0.8826	0.37745
ENSG00000281398	[161]	small nucleolar RNA host gene 4 [Source:HGNC Symbol;Acc:HGNC:32964]	chr5	139274102	139284899	1	q31.2	SNHG4	43.34	lncRNA	4469		1		1	1											0.4275	0.07809	0.27445	0.58055	-0.92844	0.35318
ENSG00000236924	-	novel transcript	chr9	6645956	6670635	1	p24.1	ENSG00000236924	46.04	lncRNA	526		1		1	1											0.565	0.04059	0.48545	0.64455	1.60152	0.10926
ENSG00000261135	-	novel transcript	chr1	16514645	16515754	1	p36.13	ENSG00000261135	41.26	lncRNA	1110		1		1	1											0.61	0.07696	0.45916	0.76084	1.42929	0.15292
ENSG00000268204	-	novel transcript, antisense to STXBP2	chr19	7633766	7636990	-1	p13.2	ENSG00000268204	54.14	lncRNA	843		1		1	1											0.57125	0.07665	0.42101	0.72149	0.92952	0.35262
ENSG00000214401	-	KANSL1 antisense RNA 1 [Source:HGNC Symbol;Acc:HGNC:43740]	chr17	46193576	46196723	1	q21.31	KANSL1-AS1	45.58	lncRNA	976		1		1	1											0.55688	0.07761	0.40476	0.70899	0.7328	0.46368
ENSG00000228889	-	UBAC2 antisense RNA 1 [Source:HGNC Symbol;Acc:HGNC:42502]	chr13	99181223	99200757	-1	q32.3	UBAC2-AS1	43.42	lncRNA	2628		1		1	1											0.43063	0.07756	0.27862	0.58263	-0.89451	0.37105
ENSG00000281641	-	SAMD12 antisense RNA 1 [Source:HGNC Symbol;Acc:HGNC:30937]	chr8	118620498	118906155	1	q24.12	SAMD12-AS1	38.12	lncRNA	3781		1		1	1											0.6125	0.07546	0.4646	0.7604	1.49085	0.136
ENSG00000281162	[143]	long intergenic non-protein coding RNA 1127 [Source:HGNC Symbol;Acc:HGNC:49292]	chr2	101962056	101987167	1	q11.2	LINC01127	48.1	lncRNA	3841		1		1	1											0.51188	0.07854	0.35793	0.66582	0.15119	0.87983
ENSG00000254389	[145]	RHPN1 antisense RNA 1 (head to head) [Source:HGNC Symbol;Acc:HGNC:28457]	chr8	143366631	143368548	-1	q24.3	RHPN1-AS1	56.05	lncRNA	1918		1		1	1											0.49562	0.07839	0.34198	0.64927	-0.05581	0.95549
ENSG00000225377	[23]	NRSN2 antisense RNA 1 [Source:HGNC Symbol;Acc:HGNC:51222]	chr20	316860	348490	-1	p13	NRSN2-AS1	51.6	lncRNA	6273		1		1	1											0.52688	0.07874	0.37256	0.68119	0.34133	0.73285
ENSG00000212978	-	novel transcript	chr2	61141592	61144969	-1	p15	ENSG00000212978	45.77	lncRNA	3109			1	1	1											0.52188	0.07853	0.36795	0.6758	0.27854	0.7806
ENSG00000264859	-	DSG2 antisense RNA 1 [Source:HGNC Symbol;Acc:HGNC:51311]	chr18	31542146	31556948	-1	q12.1	DSG2-AS1	40.22	lncRNA	2448			1	1	1											0.50688	0.07935	0.35135	0.6624	0.08664	0.93096
ENSG00000237232	[225]	ZNF295 antisense RNA 1 [Source:HGNC Symbol;Acc:HGNC:23130]	chr21	42009194	42055130	1	q22.3	ZNF295-AS1	50.2	lncRNA	7224		1		1	1											0.49688	0.07786	0.34426	0.64949	-0.04013	0.96799
ENSG00000245888	-	NSMCE1 divergent transcript [Source:HGNC Symbol;Acc:HGNC:51368]	chr16	27268205	27290492	1	p12.1	NSMCE1-DT	44.09	lncRNA	3780		1		1	1											0.47312	0.07877	0.31873	0.62752	-0.34116	0.73298
ENSG00000270115	-	novel transcript	chr1	33261212	33261680	1	p35.1	ENSG00000270115	48.19	lncRNA	469		1		1	1											0.51062	0.07684	0.36002	0.66123	0.13827	0.89003
ENSG00000237975	[206]	FLG antisense RNA 1 [Source:HGNC Symbol;Acc:HGNC:27913]	chr1	152168125	152445456	1	q21.3	FLG-AS1	40.67	lncRNA	14980		1		1	1											0.48563	0.08055	0.32775	0.6435	-0.17846	0.85836
ENSG00000213963	-	novel transcript	chr2	177283508	177392691	-1	q31.2	ENSG00000213963	40.17	lncRNA	7171		1		1	1											0.48938	0.07865	0.33522	0.64353	-0.13508	0.89255
ENSG00000260604	-	novel transcript	chr6	3904920	3911979	-1	p25.2	ENSG00000260604	45.64	lncRNA	7060		1		1	1											0.6	0.04082	0.51998	0.68002	2.44949	0.01431
ENSG00000267284	-	novel transcript	chr18	55589904	55839184	1	q21.2	ENSG00000267284	38.41	lncRNA	2654		1		1	1											0.66938	0.07122	0.52978	0.80897	2.37808	0.0174
ENSG00000231107	[257]	long intergenic non-protein coding RNA 1508 [Source:HGNC Symbol;Acc:HGNC:51190]	chr9	90300885	90433566	-1	q22.2	LINC01508	38.94	lncRNA	2007		1		1	1											0.66813	0.07449	0.52212	0.81413	2.25687	0.02402
ENSG00000274020	-	long intergenic non-protein coding RNA 1138 [Source:HGNC Symbol;Acc:HGNC:49454]	chr1	148290889	148519604	-1	q21.2	LINC01138	41.51	lncRNA	7757			1	1	1											0.65688	0.07345	0.51291	0.80084	2.13573	0.0327
ENSG00000251611	-	FAM160A1 divergent transcript [Source:HGNC Symbol;Acc:HGNC:53123]	chr4	151407551	151408835	-1	q31.3	FAM160A1-DT	54.4	lncRNA	358		1		1	1											0.64812	0.07252	0.50599	0.79026	2.04263	0.04109
ENSG00000255118	-	novel transcript	chr11	62336911	62338090	-1	q12.3	ENSG00000255118	64.15	lncRNA	485		1		1	1											0.62125	0.06026	0.50315	0.73935	2.01219	0.0442
ENSG00000249049	-	novel transcript, antisense to CCSER1	chr4	91319034	91325306	-1	q22.1	ENSG00000249049	34.43	lncRNA	375		1		1	1											0.62687	0.06406	0.50131	0.75244	1.98043	0.04766
ENSG00000225649	-	novel transcript	chr2	12780593	13007029	-1	p24.3	ENSG00000225649	38.87	lncRNA	5949		1		1	1						3.69085	-3.64656	0.759013	0.0181034	0.399382	0.59938	0.0737	0.45492	0.74383	1.34832	0.17756
ENSG00000259094	-	novel transcript, antisense to MARCO	chr2	118949306	118952983	-1	q14.2	ENSG00000259094	41.22	lncRNA	1011			1	1	1											0.385	0.04647	0.29393	0.47607	-2.47494	0.01333
ENSG00000227911	-	long intergenic non-protein coding RNA 2344 [Source:HGNC Symbol;Acc:HGNC:53264]	chr13	33333679	33335277	-1	q13.1	LINC02344	44.15	lncRNA	644		1		1	1											0.38125	0.04965	0.28394	0.47856	-2.39185	0.01676
ENSG00000260597	-	novel transcript	chr12	54019910	54022589	1	q13.13	ENSG00000260597	51.19	lncRNA	2680		1		1	1											0.34188	0.07813	0.18875	0.495	-2.02397	0.04297
ENSG00000235192	-	novel transcript	chr2	165794851	165810010	1	q24.3	ENSG00000235192	36.47	lncRNA	779		1		1	1											0.635	0.07238	0.49313	0.77687	1.86505	0.06217
ENSG00000233799	-	novel transcript, antisense to PCGF3	chr4	764487	765074	-1	p16.3	ENSG00000233799	57.14	lncRNA	286		1		1	1											0.6175	0.06396	0.49215	0.74285	1.83716	0.06619
ENSG00000229807	[19]	X inactive specific transcript [Source:HGNC Symbol;Acc:HGNC:12810]	chrX	73820649	73852723	-1	q13.2	XIST	39.78	lncRNA	25266			1	1	1											0.365	0.07362	0.22071	0.50929	-1.83378	0.06669
ENSG00000231496	-	novel transcript	chr10	10960148	10970816	1	p14	ENSG00000231496	41.09	lncRNA	540		1		1	1											0.45312	0.02618	0.40182	0.50443	-1.79078	0.07333
ENSG00000253647	-	KCNIP1 overlapping transcript 1 [Source:HGNC Symbol;Acc:HGNC:40320]	chr5	170389493	170422844	1	q35.1	KCNIP1-OT1	45.45	lncRNA	1215		1		1	1											0.45312	0.02618	0.40182	0.50443	-1.79078	0.07333
ENSG00000248265	-	uncharacterized LOC440101 [Source:NCBI gene (formerly Entrezgene);Acc:440101]	chr12	54058254	54122235	1	q13.13	FLJ12825	48.04	lncRNA	4745	1			1	1											0.36188	0.07768	0.20963	0.51412	-1.77823	0.07537
ENSG00000249464	-	long intergenic non-protein coding RNA 1091 [Source:HGNC Symbol;Acc:HGNC:27721]	chr4	123539026	123962698	1	q28.1	LINC01091	37.67	lncRNA	14337		1		1	1											0.62875	0.07461	0.48251	0.77499	1.7256	0.08442
ENSG00000271643	-	PDCD6IP divergent transcript [Source:HGNC Symbol;Acc:HGNC:55244]	chr3	33793644	33798539	-1	p22.3	PDCD6IP-DT	38.5	lncRNA	4524		1		1	1											0.37062	0.07615	0.22138	0.51987	-1.69902	0.08932
ENSG00000228262	-	long intergenic non-protein coding RNA 1320 [Source:HGNC Symbol;Acc:HGNC:50526]	chr2	33706886	34738231	1	p22.3	LINC01320	38.27	lncRNA	10109		1		1	1											0.62313	0.07406	0.47796	0.76829	1.66243	0.09643
ENSG00000261780	-	long intergenic non-protein coding RNA 2582 [Source:HGNC Symbol;Acc:HGNC:53792]	chr18	73324941	73349879	1	q22.3	LINC02582	37.89	lncRNA	2493		1		1	1											0.37812	0.07662	0.22795	0.5283	-1.59057	0.11171
ENSG00000225548	-	long intergenic non-protein coding RNA 1980 [Source:HGNC Symbol;Acc:HGNC:52808]	chr3	27797552	27931579	1	p24.1	LINC01980	38.61	lncRNA	4742		1		1	1											0.6125	0.0711	0.47315	0.75185	1.58232	0.11358
ENSG00000224063	-	novel transcript, antisense to TFPI and CALCRL	chr2	187003220	187556288	1	q32.1	ENSG00000224063	34.98	lncRNA	1826		1		1	1											0.385	0.07534	0.23734	0.53266	-1.52645	0.1269
ENSG00000242759	-	long intergenic non-protein coding RNA 882 [Source:HGNC Symbol;Acc:HGNC:48568]	chr3	106449775	107240671	-1	q13.12	LINC00882	37.1	lncRNA	19150		1		1	1											0.3875	0.07562	0.2393	0.5357	-1.48779	0.13681
ENSG00000227630	[258]	long intergenic non-protein coding RNA 1132 [Source:HGNC Symbol;Acc:HGNC:49444]	chr1	234724042	234736720	1	q42.3	LINC01132	51.03	lncRNA	5083		1		1	1											0.61187	0.07642	0.46209	0.76166	1.46391	0.14322
ENSG00000268560	-	novel transcript	chr19	20611559	20615389	1	p12	ENSG00000268560	47.38	lncRNA	628		1		1	1											0.54	0.02769	0.48573	0.59427	1.44463	0.14856
ENSG00000248322	-	novel transcript	chr1	225936411	225937557	-1	q42.12	ENSG00000248322	45.68	lncRNA	342	1			1	1											0.54	0.02769	0.48573	0.59427	1.44463	0.14856
ENSG00000272562	-	H3-3A divergent transcript [Source:HGNC Symbol;Acc:HGNC:55210]	chr1	226045561	226061898	-1	q42.12	H3-3A-DT	43.46	lncRNA	1542		1		1	1											0.61063	0.07664	0.46041	0.76084	1.44343	0.1489
ENSG00000203865	-	ATP1A1 antisense RNA 1 [Source:HGNC Symbol;Acc:HGNC:28262]	chr1	116378437	116421301	-1	p13.1	ATP1A1-AS1	44.02	lncRNA	13004		1		1	1											0.60938	0.07647	0.4595	0.75925	1.43031	0.15263
ENSG00000276122	-	novel transcript	chr12	130138693	130140768	1	q24.33	ENSG00000276122	53.71	lncRNA	2076		1		1	1											0.58187	0.05828	0.46766	0.69609	1.40494	0.16004
ENSG00000215244	-	long intergenic non-protein coding RNA 2649 [Source:HGNC Symbol;Acc:HGNC:54134]	chr10	6271169	6353827	1	p15.1	LINC02649	44.21	lncRNA	5286		1		1	1											0.60812	0.07723	0.45675	0.7595	1.39995	0.16153
ENSG00000223542	-	novel transcript, antisense to EYA4	chr6	133435077	133439464	-1	q23.2	ENSG00000223542	40.34	lncRNA	631		1		1	1											0.58312	0.06351	0.45864	0.70761	1.30879	0.1906
ENSG00000259129	[34]	long intergenic non-protein coding RNA 648 [Source:HGNC Symbol;Acc:HGNC:44302]	chr14	47764954	47795302	-1	q21.3	LINC00648	35.49	lncRNA	3253		1		1	1											0.59875	0.07551	0.45075	0.74675	1.30774	0.19096
ENSG00000257880	-	novel transcript, sense intronic to FAM19A2	chr12	62139999	62145643	-1	q14.1	ENSG00000257880	41.58	lncRNA	477		1		1	1											0.42	0.06143	0.2996	0.5404	-1.30235	0.1928
ENSG00000225465	[259]	RFPL1 antisense RNA 1 [Source:HGNC Symbol;Acc:HGNC:9978]	chr22	29436534	29478868	-1	q12.2	RFPL1S	49.58	lncRNA	7516		1		1	1											0.40625	0.07623	0.25685	0.55565	-1.2299	0.21873
ENSG00000247137	-	novel transcript	chr11	83184491	83193794	-1	q14.1	ENSG00000247137	40.91	lncRNA	3418		1		1	1											0.40438	0.07804	0.25142	0.55733	-1.22536	0.22044
ENSG00000240291	-	novel transcript, antisense to CACNB2	chr10	18513115	18545651	-1	p12.31	ENSG00000240291	39.11	lncRNA	1575		1		1	1											0.59438	0.07744	0.44259	0.74616	1.21863	0.22298
ENSG00000176236	-	RPP38 divergent transcript [Source:HGNC Symbol;Acc:HGNC:28582]	chr10	15095385	15097319	-1	p13	RPP38-DT	48.17	lncRNA	1714		1		1	1											0.5925	0.07731	0.44098	0.74402	1.19652	0.23149
ENSG00000272338	-	novel transcript	chr8	33360839	33361415	-1	p12	ENSG00000272338	40.21	lncRNA	577		1		1	1											0.58812	0.07729	0.43663	0.73962	1.14012	0.25424
ENSG00000270996	-	novel transcript	chr2	75719120	75720018	1	p12	ENSG00000270996	34.59	lncRNA	899		1		1	1											0.58625	0.07575	0.43779	0.73471	1.13865	0.25485
ENSG00000260805	-	novel transcript	chr1	212557833	212559731	-1	q32.3	ENSG00000260805	56.29	lncRNA	1899		1		1	1											0.5875	0.07715	0.43629	0.73871	1.1342	0.25671
ENSG00000183242	[260]	WT1 antisense RNA [Source:HGNC Symbol;Acc:HGNC:18135]	chr11	32435518	32458769	1	p13	WT1-AS	44.72	lncRNA	5561	1			1	1											0.58625	0.07609	0.43711	0.73539	1.13351	0.257
ENSG00000272620	[261]	AFAP1 antisense RNA 1 [Source:HGNC Symbol;Acc:HGNC:28141]	chr4	7754077	7778928	1	p16.1	AFAP1-AS1	52.9	lncRNA	12180		1		1	1											0.4125	0.07817	0.25929	0.56571	-1.11937	0.26298
ENSG00000237807	-	novel transcript	chr8	53493523	53524336	-1	q11.23	ENSG00000237807	44.45	lncRNA	7527		1		1	1											0.4125	0.07873	0.25818	0.56682	-1.11133	0.26642
ENSG00000225213	-	novel transcript, sense intronic to RSU1	chr10	16721352	16748377	-1	p13	ENSG00000225213	39.83	lncRNA	697		1		1	1											0.41625	0.07539	0.26848	0.56402	-1.11085	0.26663
ENSG00000261734	-	novel transcript	chr3	20388249	20390562	1	p24.3	ENSG00000261734	36.95	lncRNA	2314		1		1	1											0.5475	0.04327	0.4627	0.6323	1.09781	0.27229
ENSG00000223387	[262]	long intergenic non-protein coding RNA 2068 [Source:HGNC Symbol;Acc:HGNC:52914]	chr3	172560888	172595607	-1	q26.31	LINC02068	40.99	lncRNA	3667		1		1	1											0.58563	0.07828	0.4322	0.73905	1.09386	0.27402
ENSG00000261366	-	MANEA divergent transcript [Source:HGNC Symbol;Acc:HGNC:43732]	chr6	95575183	95577450	-1	q16.1	MANEA-DT	32.72	lncRNA	2268		1		1	1											0.585	0.07778	0.43256	0.73744	1.09285	0.27446
ENSG00000269553	-	novel transcript	chr19	35330843	35331920	1	q13.12	ENSG00000269553	50.65	lncRNA	435		1		1	1											0.43625	0.05834	0.3219	0.5506	-1.09269	0.27453
ENSG00000272312	-	novel transcript	chr6	27001208	27001648	-1	p22.2	ENSG00000272312	29.25	lncRNA	441		1		1	1											0.41625	0.0768	0.26572	0.56678	-1.09043	0.27552
ENSG00000260035	-	novel transcript	chr15	45200325	45200632	-1	q21.1	ENSG00000260035	50	lncRNA	308			1	1	1											0.54688	0.04326	0.46209	0.63166	1.08357	0.27856
ENSG00000273783	-	novel transcript, antisense to GTF2A1	chr14	81221218	81222460	1	q31.1	ENSG00000273783	46.82	lncRNA	1130		1		1	1											0.41375	0.08001	0.25694	0.57056	-1.07803	0.28102
ENSG00000254024	-	novel transcript	chr8	101461177	101492499	-1	q22.3	ENSG00000254024	42.28	lncRNA	491		1		1	1											0.545	0.0432	0.46032	0.62968	1.04157	0.29761
ENSG00000228223	[263]	HLA complex group 11 [Source:HGNC Symbol;Acc:HGNC:17707]	chr6	26521709	26527404	1	p22.2	HCG11	41.73	lncRNA	5696		1		1	1											0.5825	0.07965	0.42638	0.73862	1.03572	0.30033
ENSG00000251615	-	novel transcript	chr4	8355090	8358338	-1	p16.1	ENSG00000251615	44.97	lncRNA	3249		1		1	1											0.42	0.07851	0.26612	0.57388	-1.01894	0.30823
ENSG00000273348	-	novel transcript	chr18	22347846	22348252	-1	q11.2	ENSG00000273348	37.84	lncRNA	407		1		1	1											0.45	0.04987	0.35225	0.54775	-1.00257	0.31607
ENSG00000273258	-	novel transcript	chr2	174011856	174012975	-1	q31.1	ENSG00000273258	55.8	lncRNA	358		1		1	1											0.52	0.02	0.4808	0.5592	1	0.31731
ENSG00000290836	-	Pro-melanin concentrating hormone like 2 (pseudogene)	chr5	71375786	71385993	1		PMCHL2		lncRNA			1		1	1											0.52	0.02	0.4808	0.5592	1	0.31731
ENSG00000261273	-	novel transcript	chr16	88234785	88302511	1	q24.2	ENSG00000261273	52.63	lncRNA	434		1		1	1											0.48438	0.01562	0.45375	0.515	-1	0.31731
ENSG00000265094	-	novel transcript	chr18	24435364	24439638	1	q11.2	ENSG00000265094	38.9	lncRNA	281		1		1	1											0.48438	0.01562	0.45375	0.515	-1	0.31731
ENSG00000255966	-	novel transcript	chr12	6532290	6533498	-1	p13.31	ENSG00000255966	57.65	lncRNA	477		1		1	1											0.57688	0.07758	0.42482	0.72893	0.9909	0.32173
ENSG00000236318	-	long intergenic non-protein coding RNA 2888 [Source:HGNC Symbol;Acc:HGNC:53765]	chr7	17374867	17467256	1	p21.1	LINC02888	38.12	lncRNA	1957		1		1	1											0.42375	0.07695	0.27292	0.57458	-0.99086	0.32175
ENSG00000234690	-	EPCAM divergent transcript [Source:HGNC Symbol;Acc:HGNC:52639]	chr2	47192405	47345074	-1	p21	EPCAM-DT	46.05	lncRNA	3594		1		1	1											0.57625	0.07698	0.42538	0.72712	0.99057	0.3219
ENSG00000252690	-	TEC	chr15	82752884	82757208	1	q25.2	ENSG00000252690	38.13	lncRNA	4325		1		1	1											0.42125	0.08034	0.26379	0.57871	-0.98026	0.32696
ENSG00000283667	-	novel transcript, antisense to SERPINB8	chr18	63966406	63970181	-1	q22.1	ENSG00000283667	44.2	lncRNA	1609		1		1	1											0.57562	0.07738	0.42396	0.72729	0.97731	0.32842
ENSG00000231881	-	novel transcript	chr6	44058792	44089288	1	p21.1	ENSG00000231881	53.91	lncRNA	26394		1		1	1											0.57625	0.07837	0.42265	0.72985	0.97298	0.33056
ENSG00000253361	-	novel transcript	chr8	38543276	38560877	-1	p11.22	ENSG00000253361	48.04	lncRNA	4637		1		1	1											0.435	0.06723	0.30324	0.56676	-0.96687	0.33361
ENSG00000233246	-	PHC2 antisense RNA 1 [Source:HGNC Symbol;Acc:HGNC:40205]	chr1	33350352	33363245	1	p35.1	PHC2-AS1	45.95	lncRNA	490		1		1	1											0.56313	0.06557	0.43462	0.69163	0.96278	0.33566
ENSG00000236393	-	novel transcript	chrX	40262917	40299061	1	p11.4	ENSG00000236393	48.08	lncRNA	3300		1		1	1											0.44562	0.057	0.3339	0.55735	-0.95388	0.34014
ENSG00000179136	-	long intergenic non-protein coding RNA 670 [Source:HGNC Symbol;Acc:HGNC:44338]	chr17	12549764	12642854	1	p12	LINC00670	40.04	lncRNA	4756		1		1	1											0.55	0.05291	0.44631	0.65369	0.94508	0.34462
ENSG00000234928	-	long intergenic non-protein coding RNA 1659 [Source:HGNC Symbol;Acc:HGNC:52447]	chr22	23433564	23435071	1	q11.23	LINC01659	60.01	lncRNA	1083		1		1	1											0.56813	0.07385	0.42338	0.71287	0.92248	0.35628
ENSG00000272942	-	novel transcript	chr22	25434324	25435070	-1	q11.23	ENSG00000272942	48.73	lncRNA	747		1		1	1											0.57062	0.07659	0.42051	0.72074	0.92212	0.35646
ENSG00000277310	-	novel transcript, sense intronic to CCDC11	chr18	50256036	50256461	-1	q21.1	ENSG00000277310	35.21	lncRNA	426		1		1	1											0.56875	0.07515	0.42145	0.71605	0.91481	0.36029
ENSG00000258592	-	novel transcript	chr14	57066260	57112660	-1	q22.3	ENSG00000258592	39.67	lncRNA	1577		1		1	1											0.57	0.07677	0.41953	0.72047	0.9118	0.36188
ENSG00000225399	-	novel transcript	chr3	49260085	49261316	1	p21.31	ENSG00000225399	45.94	lncRNA	1232		1		1	1											0.56688	0.07358	0.42266	0.71109	0.90887	0.36342
ENSG00000236953	-	ZDHHC20 intronic transcript 1 [Source:HGNC Symbol;Acc:HGNC:39900]	chr13	21376977	21377874	-1	q12.11	ZDHHC20-IT1	57.91	lncRNA	440		1		1	1											0.56	0.06823	0.42628	0.69372	0.87943	0.37917
ENSG00000283141	-	long intergenic non-protein coding RNA 2666 [Source:HGNC Symbol;Acc:HGNC:54152]	chr10	129784983	129806971	1	q26.3	LINC02666	45.51	lncRNA	1005		1		1	1											0.565	0.07597	0.4161	0.7139	0.85557	0.39224
ENSG00000256417	-	novel transcript	chr12	5290480	5383653	1	p13.32	ENSG00000256417	40.6	lncRNA	1604		1		1	1											0.56688	0.07832	0.41336	0.72039	0.85382	0.3932
ENSG00000267309	-	ZNF566 antisense RNA 1 [Source:HGNC Symbol;Acc:HGNC:55301]	chr19	36489649	36491040	1	q13.12	ZNF566-AS1	57.69	lncRNA	1392		1		1	1											0.56563	0.07784	0.41305	0.7182	0.84303	0.39921
ENSG00000261242	-	novel transcript, antisense to PPP2R5E	chr14	63543569	63544664	1	q23.2	ENSG00000261242	47.72	lncRNA	1096		1		1	1											0.435	0.07748	0.28314	0.58686	-0.83893	0.40151
ENSG00000228393	[34]	long intergenic non-protein coding RNA 1004 [Source:HGNC Symbol;Acc:HGNC:48961]	chr7	104950315	105013044	-1	q22.3	LINC01004	42	lncRNA	1483		1		1	1											0.55313	0.06348	0.4287	0.67755	0.83682	0.40269
ENSG00000205740	-	novel transcript, antisense to GTPBP4	chr10	971146	988341	-1	p15.3	ENSG00000205740	46.7	lncRNA	4964		1		1	1											0.56563	0.07889	0.411	0.72025	0.83183	0.40551
ENSG00000263766	-	KPNB1 divergent transcript [Source:HGNC Symbol;Acc:HGNC:55336]	chr17	47603860	47649420	-1	q21.32	KPNB1-DT	43.3	lncRNA	1242		1		1	1											0.56375	0.07735	0.41214	0.71536	0.82415	0.40985
ENSG00000271551	-	novel transcript, antisense to ARID1B	chr6	156776360	156778422	-1	q25.3	ENSG00000271551	61.08	lncRNA	1249		1		1	1											0.56375	0.0779	0.41107	0.71643	0.81838	0.41314
ENSG00000248866	-	USP46 divergent transcript [Source:HGNC Symbol;Acc:HGNC:43991]	chr4	52659406	52661668	1	q12	USP46-DT	49.93	lncRNA	1048			1	1	1											0.5625	0.07843	0.40878	0.71622	0.79687	0.42553
ENSG00000246465	-	novel transcript LOC100506705	chr16	28284885	28292064	-1	p12.1	ENSG00000246465	49.16	lncRNA	2481		1		1	1											0.5625	0.0796	0.40649	0.71851	0.78517	0.43235
ENSG00000273372	-	SFTPD antisense RNA 1 [Source:HGNC Symbol;Acc:HGNC:51589]	chr10	79968213	79973213	1	q22.3	SFTPD-AS1	37.27	lncRNA	5001		1		1	1											0.4425	0.07333	0.29877	0.58623	-0.78411	0.43297
ENSG00000198106	-	novel transcript	chr16	29291220	29372110	1	p11.2	ENSG00000198106	50.43	lncRNA	4818		1		1	1											0.43938	0.07749	0.2875	0.59125	-0.78238	0.43399
ENSG00000269959	-	SPACA6P antisense RNA [Source:HGNC Symbol;Acc:HGNC:49383]	chr19	51685363	51693456	-1	q13.41	SPACA6P-AS	57.03	lncRNA	3962		1		1	1											0.44	0.07818	0.28677	0.59323	-0.76748	0.44279
ENSG00000265349	-	novel transcript, antisense to WDR16 and USP43	chr17	9638768	9645325	-1	p13.1	ENSG00000265349	45.32	lncRNA	212		1		1	1											0.52437	0.03179	0.46206	0.58669	0.76667	0.44328
ENSG00000177640	[264]	cancer susceptibility 2 [Source:HGNC Symbol;Acc:HGNC:22933]	chr10	118046279	118210158	1	q26.11	CASC2	38.26	lncRNA	14972		1		1	1											0.55875	0.07888	0.40415	0.71335	0.74482	0.45638
ENSG00000230109	-	long intergenic non-protein coding RNA 2643 [Source:HGNC Symbol;Acc:HGNC:54126]	chr10	21340233	21372950	-1	p12.31	LINC02643	43.79	lncRNA	439		1		1	1											0.45312	0.06307	0.32951	0.57674	-0.74323	0.45734
ENSG00000246308	-	novel transcript, antisense to ZBED5	chr11	10809204	10822931	1	p15.4	ENSG00000246308	39.76	lncRNA	2428		1		1	1											0.44188	0.07944	0.28617	0.59758	-0.73165	0.46438
ENSG00000164385	-	long intergenic non-protein coding RNA 1600 [Source:HGNC Symbol;Acc:HGNC:21600]	chr6	2621913	2634619	-1	p25.2	LINC01600	46.53	lncRNA	3108		1		1	1											0.54562	0.06361	0.42094	0.67031	0.71721	0.47325
ENSG00000268896	-	novel transcript, antisense to TMEM198	chr2	219547211	219547658	-1	q35	ENSG00000268896	55.13	lncRNA	448		1		1	1											0.44562	0.07619	0.29629	0.59496	-0.71366	0.47544
ENSG00000233214	-	novel transcript	chr19	35424062	35424652	-1	q13.12	ENSG00000233214	53.64	lncRNA	450		1		1	1											0.46625	0.04841	0.37136	0.56114	-0.6971	0.48574
ENSG00000222033	-	long intergenic non-protein coding RNA 1124 [Source:HGNC Symbol;Acc:HGNC:49270]	chr2	170712451	170714567	-1	q31.1	LINC01124	60.56	lncRNA	2117	1			1	1											0.555	0.07896	0.40024	0.70976	0.69653	0.4861
ENSG00000226891	-	long intergenic non-protein coding RNA 1359 [Source:HGNC Symbol;Acc:HGNC:50591]	chr1	64972225	65002489	-1	p31.3	LINC01359	42.17	lncRNA	7863		1		1	1											0.55375	0.07806	0.40076	0.70674	0.68858	0.49109
ENSG00000272482	-	novel transcript	chr1	12618900	12619244	-1	p36.21	ENSG00000272482	55.65	lncRNA	345			1	1	1											0.5525	0.07694	0.4017	0.7033	0.68234	0.49503
ENSG00000273203	-	novel transcript	chr22	17067821	17070675	1	q11.1	ENSG00000273203	41.61	lncRNA	2855		1		1	1											0.44688	0.07901	0.29203	0.60172	-0.67242	0.50131
ENSG00000273245	-	novel transcript	chr2	73750256	73750786	-1	p13.1	ENSG00000273245	41.43	lncRNA	531		1		1	1											0.55062	0.07651	0.40067	0.70058	0.6617	0.50816
ENSG00000240207	-	novel transcript, antisense to RARRES1	chr3	158732263	158784070	1	q25.32	ENSG00000240207	43.38	lncRNA	6252		1		1	1											0.4475	0.08102	0.28869	0.60631	-0.64795	0.51702
ENSG00000272323	-	TTC23L antisense RNA 1 [Source:HGNC Symbol;Acc:HGNC:55215]	chr5	34837549	34839278	-1	p13.2	TTC23L-AS1	46.88	lncRNA	1565		1		1	1											0.55	0.07815	0.39682	0.70318	0.63977	0.52232
ENSG00000255983	-	novel transcript	chr12	5388589	5406651	1	p13.31	ENSG00000255983	43.35	lncRNA	1405		1		1	1											0.54875	0.07633	0.39914	0.69836	0.63865	0.52305
ENSG00000269982	-	novel transcript, antisense to TMEM111	chr3	9958717	9962539	1	p25.3	ENSG00000269982	46.14	lncRNA	3823		1		1	1											0.4525	0.07843	0.29878	0.60622	-0.60563	0.54476
ENSG00000271980	-	novel transcript, antisense to CCT5	chr5	10264597	10267146	-1	p15.2	ENSG00000271980	40.55	lncRNA	2550		1		1	1											0.54688	0.07759	0.3948	0.69895	0.60414	0.54575
ENSG00000261379	-	novel transcript	chr2	226804036	226805061	1	q36.3	ENSG00000261379	38.69	lncRNA	1026		1		1	1											0.455	0.07463	0.30873	0.60127	-0.60297	0.54653
ENSG00000253125	-	novel transcript	chr8	22690150	22798616	1	p21.3	ENSG00000253125	52.43	lncRNA	2191			1	1	1											0.53812	0.06377	0.41313	0.66312	0.59781	0.54997
ENSG00000227896	-	novel transcript	chr10	86521945	86525101	1	q23.2	ENSG00000227896	47.2	lncRNA	3058		1		1	1											0.45438	0.07847	0.30058	0.60817	-0.58146	0.56093
ENSG00000103472	-	RRN3 pseudogene 2 [Source:HGNC Symbol;Acc:HGNC:37619]	chr16	29074976	29116718	1	p11.2	RRN3P2	44.01	lncRNA	2271			1	1	1											0.455	0.07746	0.30319	0.60681	-0.58097	0.56126
ENSG00000166917	-	MIR202 host gene [Source:HGNC Symbol;Acc:HGNC:49402]	chr10	133246478	133247891	-1	q26.3	MIR202HG	57.57	lncRNA	1307		1		1	1											0.47688	0.04059	0.39733	0.55642	-0.56978	0.56883
ENSG00000259820	-	novel transcript	chr8	134792020	134798272	-1	q24.22	ENSG00000259820	36.21	lncRNA	6253		1		1	1											0.45562	0.07803	0.3027	0.60855	-0.56872	0.56954
ENSG00000273181	-	novel transcript	chr3	184132942	184133561	-1	q27.1	ENSG00000273181	33.06	lncRNA	620		1		1	1											0.54312	0.0771	0.39202	0.69423	0.55937	0.57591
ENSG00000237883	-	DGUOK antisense RNA 1 [Source:HGNC Symbol;Acc:HGNC:43441]	chr2	73947322	73981441	-1	p13.1	DGUOK-AS1	45.29	lncRNA	1185		1		1	1											0.45625	0.07838	0.30264	0.60986	-0.55821	0.5767
ENSG00000260855	-	novel transcript	chr1	246772301	246775772	1	q44	ENSG00000260855	38.91	lncRNA	3472		1		1	1											0.54313	0.07849	0.38929	0.69696	0.54946	0.58269
ENSG00000254777	-	novel transcript	chr8	60910053	60966557	1	q12.2	ENSG00000254777	44.84	lncRNA	1363		1		1	1											0.45375	0.08439	0.28835	0.61915	-0.54806	0.58365
ENSG00000234076	-	TPRG1 antisense RNA 1 [Source:HGNC Symbol;Acc:HGNC:42391]	chr3	188941715	188947639	-1	q28	TPRG1-AS1	42.62	lncRNA	697		1		1	1											0.54188	0.07779	0.3894	0.69435	0.53828	0.59038
ENSG00000231154	-	MORF4L2 antisense RNA 1 [Source:HGNC Symbol;Acc:HGNC:27991]	chrX	103687284	103691772	1	q22.2	MORF4L2-AS1	42.5	lncRNA	2086		1		1	1											0.4575	0.07898	0.30271	0.61229	-0.53813	0.59049
ENSG00000247324	-	novel transcript, antisense to ZNF23	chr16	71462278	71465941	1	q22.2	ENSG00000247324	44.43	lncRNA	2793		1		1	1											0.45875	0.07875	0.30441	0.61309	-0.52382	0.60041
ENSG00000229321	-	novel transcript	chr2	206798325	206926876	1	q33.3	ENSG00000229321	39.81	lncRNA	5548		1		1	1											0.45938	0.07765	0.30718	0.61157	-0.52317	0.60085
ENSG00000223829	-	novel transcript	chr7	46969644	47027481	1	p12.3	ENSG00000223829	37.26	lncRNA	1595		1		1	1											0.54062	0.07962	0.38458	0.69667	0.51027	0.60986
ENSG00000223813	-	novel transcript, antisense to CHN2	chr7	29514224	29563670	-1	p14.3	ENSG00000223813	39.2	lncRNA	1441		1		1	1											0.54	0.07881	0.38553	0.69447	0.50753	0.61178
ENSG00000242622	-	novel transcript	chr3	120094895	120136783	1	q13.33	ENSG00000242622	41.62	lncRNA	3229		1		1	1											0.46062	0.07815	0.30745	0.6138	-0.50382	0.61439
ENSG00000261251	-	EFCAB6 divergent transcript [Source:HGNC Symbol;Acc:HGNC:55371]	chr22	43812456	43817394	1	q13.31	EFCAB6-DT	46.26	lncRNA	1981		1		1	1											0.46125	0.07852	0.30735	0.61515	-0.4935	0.62166
ENSG00000274925	-	ZKSCAN2 divergent transcript [Source:HGNC Symbol;Acc:HGNC:53912]	chr16	25257952	25261066	1	p12.1	ZKSCAN2-DT	48.73	lncRNA	3115	1			1	1											0.46062	0.08033	0.30317	0.61808	-0.49015	0.62403
ENSG00000234567	-	novel transcript	chr6	133452857	133456605	-1	q23.2	ENSG00000234567	32.7	lncRNA	317		1		1	1											0.46	0.08246	0.29837	0.62163	-0.48506	0.62763
ENSG00000271401	-	novel transcript	chr2	178644717	178645179	1	q31.2	ENSG00000271401	36.72	lncRNA	463		1		1	1											0.53562	0.0735	0.39157	0.67968	0.48469	0.62789
ENSG00000237359	-	novel transcript	chr9	3630947	3648390	1	p24.2	ENSG00000237359	37.24	lncRNA	944		1		1	1											0.46125	0.08017	0.30412	0.61838	-0.48336	0.62884
ENSG00000278467	-	novel transcript	chr1	223994262	223995196	1	q42.11	ENSG00000278467	44.92	lncRNA	573		1		1	1											0.46188	0.07982	0.30543	0.61832	-0.47764	0.6329
ENSG00000262362	-	novel transcript, sense overlapping CLDN6	chr16	3003431	3005101	-1	p13.3	ENSG00000262362	68.04	lncRNA	608		1		1	1											0.46375	0.0768	0.31323	0.61427	-0.47202	0.63691
ENSG00000230551	-	novel transcript	chr5	149494314	149504670	-1	q32	ENSG00000230551	37.36	lncRNA	8636		1		1	1											0.46312	0.07856	0.30915	0.6171	-0.4694	0.63879
ENSG00000248596	-	novel transcript	chr5	176143085	176185155	-1	q35.2	ENSG00000248596	43.36	lncRNA	3632		1		1	1											0.46375	0.0775	0.31186	0.61564	-0.46776	0.63995
ENSG00000270077	-	novel transcript, sense intronic to PGCP	chr8	97144170	97144723	1	q22.1	ENSG00000270077	30.51	lncRNA	554		1		1	1											0.53625	0.0776	0.38416	0.68834	0.46713	0.6404
ENSG00000268333	-	novel transcript	chr20	58833809	58836529	-1	q13.32	ENSG00000268333	47.89	lncRNA	1153		1		1	1											0.465	0.07699	0.3141	0.6159	-0.45458	0.64941
ENSG00000224789	-	novel transcript	chr2	120174885	120216544	-1	q14.2	ENSG00000224789	44.05	lncRNA	575		1		1	1											0.53125	0.06963	0.39478	0.66772	0.44881	0.65357
ENSG00000239665	-	novel transcript	chr10	13631143	13668445	1	p13	ENSG00000239665	46.33	lncRNA	15012		1		1	1											0.53563	0.08052	0.37782	0.69343	0.44246	0.65816
ENSG00000259649	-	novel transcript, antisense to CEMIP	chr15	80896191	80909777	-1	q25.1	ENSG00000259649	47.98	lncRNA	744		1		1	1											0.46938	0.06939	0.33337	0.60538	-0.44134	0.65897
ENSG00000272551	-	novel transcript	chr2	176611437	176612249	-1	q31.1	ENSG00000272551	39.11	lncRNA	813		1		1	1											0.53313	0.07671	0.38277	0.68348	0.4318	0.66588
ENSG00000271270	-	TMCC1 divergent transcript [Source:HGNC Symbol;Acc:HGNC:49060]	chr3	129893811	129918575	1	q22.1	TMCC1-DT	44.12	lncRNA	7702		1		1	1											0.46688	0.07786	0.31428	0.61947	-0.42546	0.6705
ENSG00000263826	-	novel transcript, antisense to eukaryotic translation initiation factor 4A, isoform 2 EIF4A2	chr3	186781780	186784179	-1	q27.3	ENSG00000263826	47.5	lncRNA	2400		1		1	1											0.46688	0.07812	0.31377	0.61998	-0.42404	0.67154
ENSG00000260461	-	novel transcript, overlapping to OBFC1	chr10	103877374	103879761	-1	q24.33	ENSG00000260461	47.49	lncRNA	2388		1		1	1											0.46812	0.07849	0.31429	0.62196	-0.40612	0.68465
ENSG00000260339	-	HEXA antisense RNA 1 [Source:HGNC Symbol;Acc:HGNC:25810]	chr15	72376113	72378788	1	q23	HEXA-AS1	41.18	lncRNA	2676		1		1	1											0.46812	0.07865	0.31398	0.62227	-0.40529	0.68526
ENSG00000250064	-	novel transcript	chr4	28435449	28600275	1	p15.1	ENSG00000250064	36.14	lncRNA	712		1		1	1											0.48813	0.02945	0.43041	0.54584	-0.40325	0.68677
ENSG00000225930	[247]	long intergenic non-protein coding RNA 2249 [Source:HGNC Symbol;Acc:HGNC:32351]	chr15	30195809	30217552	1	q13.2	LINC02249	40.77	lncRNA	5281		1		1	1											0.46938	0.07624	0.31994	0.61881	-0.40168	0.68792
ENSG00000239467	[265]	glutamate rich 2 [Source:NCBI gene (formerly Entrezgene);Acc:285141]	chr2	170766878	170778729	1	q31.1	ENSG00000239467	41.61	lncRNA	2905		1		1	1											0.53125	0.07867	0.37706	0.68544	0.39722	0.6912
ENSG00000266904	-	long intergenic non-protein coding RNA 663 [Source:HGNC Symbol;Acc:HGNC:28609]	chr19	19757366	19776423	-1	p13.11	LINC00663	44.24	lncRNA	4334		1		1	1											0.53062	0.07815	0.37746	0.68379	0.39188	0.69515
ENSG00000258700	-	long intergenic non-protein coding RNA 871 [Source:HGNC Symbol;Acc:HGNC:47038]	chr14	45891087	46501903	1	q21.2	LINC00871	34.66	lncRNA	1746		1		1	1											0.47375	0.06889	0.33873	0.60877	-0.38105	0.70317
ENSG00000273001	-	PFKP divergent transcript [Source:HGNC Symbol;Acc:HGNC:55177]	chr10	3065424	3066001	-1	p15.2	PFKP-DT	44.98	lncRNA	578		1		1	1											0.52937	0.07835	0.3758	0.68295	0.3749	0.70773
ENSG00000232680	-	novel transcript	chr19	35432957	35434642	-1	q13.12	ENSG00000232680	53.62	lncRNA	1000		1		1	1											0.4825	0.04674	0.3909	0.5741	-0.37443	0.70808
ENSG00000267598	-	novel transcript, antisense to IER2	chr19	13153071	13154193	-1	p13.13	ENSG00000267598	69.63	lncRNA	946			1	1	1											0.47	0.08039	0.31245	0.62755	-0.3732	0.709
ENSG00000212743	-	long intergenic non-protein coding RNA 2656 [Source:HGNC Symbol;Acc:HGNC:54142]	chr10	6350316	6352762	1	p15.1	LINC02656	41.36	lncRNA	2447		1		1	1											0.52875	0.07773	0.37641	0.68109	0.36989	0.71147
ENSG00000253217	-	novel transcript	chr8	100337595	100350707	1	q22.2	ENSG00000253217	38.5	lncRNA	546		1		1	1											0.52937	0.07947	0.37361	0.68514	0.36961	0.71167
ENSG00000274173	-	novel transcript	chr20	24931840	24932983	1	p11.21	ENSG00000274173	42.22	lncRNA	1144		1		1	1											0.52937	0.07953	0.3735	0.68525	0.36936	0.71186
ENSG00000257433	-	novel transcript, antisense to ENDOU and RAPGEF3	chr12	47706083	47742294	1	q13.11	ENSG00000257433	50.18	lncRNA	5445		1		1	1											0.52875	0.07928	0.37336	0.68414	0.36264	0.71687
ENSG00000254691	-	novel transcript	chr11	77850604	77851511	1	q14.1	ENSG00000254691	39.98	lncRNA	551		1		1	1											0.52688	0.0743	0.38125	0.6725	0.36171	0.71757
ENSG00000272678	-	novel transcript, antisense to ADCY5	chr3	123283593	123283983	1	q21.1	ENSG00000272678	40.66	lncRNA	391		1		1	1											0.52375	0.06678	0.39286	0.65464	0.35564	0.72211
ENSG00000272563	-	novel transcript	chr2	113432600	113436042	1	q14.1	ENSG00000272563	38.22	lncRNA	3443		1		1	1											0.4725	0.07782	0.31998	0.62502	-0.35339	0.72379
ENSG00000272316	-	novel transcript	chr6	57908560	57913911	-1	p11.2	ENSG00000272316	34.62	lncRNA	5352		1		1	1											0.5275	0.07902	0.37263	0.68237	0.34802	0.72782
ENSG00000197182	-	MIRLET7B host gene [Source:HGNC Symbol;Acc:HGNC:37189]	chr22	46053869	46113928	1	q13.31	MIRLET7BHG	56.82	lncRNA	5728	1			1	1											0.47188	0.08085	0.31341	0.63034	-0.34787	0.72794
ENSG00000270571	-	novel transcript, antisense to TACR1	chr2	75154366	75189949	1	p12	ENSG00000270571	38.49	lncRNA	3438		1		1	1											0.52688	0.07805	0.3739	0.67985	0.34434	0.73059
ENSG00000248323	[266]	lung cancer associated transcript 1 [Source:HGNC Symbol;Acc:HGNC:48498]	chr5	91054834	91314547	-1	q14.3	LUCAT1	39.52	lncRNA	16558		1		1	1											0.47375	0.07779	0.32128	0.62622	-0.33744	0.73578
ENSG00000270659	-	novel transcript	chr2	213152970	213153659	1	q34	ENSG00000270659	30	lncRNA	690		1		1	1											0.52625	0.07806	0.37326	0.67924	0.33629	0.73665
ENSG00000240086	-	novel transcript, antisense to EPHB1	chr3	135138469	135439888	-1	q22.2	ENSG00000240086	41.7	lncRNA	9663		1		1	1											0.47312	0.08089	0.31459	0.63166	-0.33226	0.7397
ENSG00000256546	-	novel transcript	chr12	122063306	122068616	1	q24.31	ENSG00000256546	50.95	lncRNA	1831		1		1	1											0.52562	0.07807	0.37261	0.67864	0.32823	0.74274
ENSG00000163364	[267]	long intergenic non-protein coding RNA 1116 [Source:HGNC Symbol;Acc:HGNC:49259]	chr2	176629572	176637931	-1	q31.1	LINC01116	38.98	lncRNA	2126		1		1	1											0.52562	0.07817	0.37241	0.67884	0.32781	0.74306
ENSG00000238058	-	novel transcript	chr9	135907812	135916126	1	q34.3	ENSG00000238058	49.4	lncRNA	839		1		1	1											0.475	0.07945	0.31929	0.63071	-0.31468	0.753
ENSG00000259495	-	novel transcript	chr15	80344853	80404214	-1	q25.1	ENSG00000259495	40.94	lncRNA	8069		1		1	1											0.47562	0.07845	0.32186	0.62939	-0.31071	0.75602
ENSG00000271967	-	novel transcript	chr6	70596438	70596980	1	q13	ENSG00000271967	31.68	lncRNA	543		1		1	1											0.47562	0.07846	0.32184	0.62941	-0.31066	0.75606
ENSG00000272631	-	novel transcript, antisense to BMPR1A	chr10	86749754	86756298	-1	q23.2	ENSG00000272631	44.98	lncRNA	6545		1		1	1											0.52438	0.07955	0.36846	0.68029	0.3064	0.7593
ENSG00000237491	-	long intergenic non-protein coding RNA 1409 [Source:HGNC Symbol;Acc:HGNC:50701]	chr1	778747	810065	1	p36.33	LINC01409	40.44	lncRNA	8413		1		1	1											0.47625	0.08069	0.31809	0.63441	-0.29432	0.76851
ENSG00000261104	-	novel transcript	chr2	9106593	9109865	1	p25.1	ENSG00000261104	50.87	lncRNA	3273		1		1	1											0.4775	0.07662	0.32732	0.62768	-0.29365	0.76903
ENSG00000232164	-	long intergenic non-protein coding RNA 1873 [Source:HGNC Symbol;Acc:HGNC:52692]	chr2	66383306	66392450	1	p14	LINC01873	37.09	lncRNA	1679		1		1	1											0.47812	0.07575	0.32965	0.6266	-0.28877	0.77276
ENSG00000226235	[268]	LEMD1 antisense RNA 1 [Source:HGNC Symbol;Acc:HGNC:44132]	chr1	205373252	205387440	1	q32.1	LEMD1-AS1	44.6	lncRNA	2781		1		1	1											0.47812	0.07704	0.32713	0.62912	-0.28395	0.77645
ENSG00000231711	-	long intergenic non-protein coding RNA 899 [Source:HGNC Symbol;Acc:HGNC:48583]	chr22	46039907	46044853	-1	q13.31	LINC00899	48.64	lncRNA	4947		1		1	1											0.4775	0.07949	0.32171	0.63329	-0.28306	0.77713
ENSG00000233396	-	long intergenic non-protein coding RNA 1719 [Source:HGNC Symbol;Acc:HGNC:52506]	chr1	146052566	146061948	1	q21.1	LINC01719	44.84	lncRNA	4614		1		1	1											0.4775	0.08005	0.32061	0.63439	-0.28108	0.77865
ENSG00000228065	-	long intergenic non-protein coding RNA 1515 [Source:HGNC Symbol;Acc:HGNC:51210]	chr10	65570338	65880289	1	q21.3	LINC01515	35.09	lncRNA	18570		1		1	1											0.4775	0.08063	0.31946	0.63554	-0.27904	0.78021
ENSG00000230490	-	novel transcript	chr13	33355206	33676796	-1	q13.2	ENSG00000230490	38.53	lncRNA	6320		1		1	1											0.52188	0.07882	0.3674	0.67635	0.27755	0.78136
ENSG00000233725	[269]	non-coding RNA in the aldehyde dehydrogenase 1A pathway [Source:HGNC Symbol;Acc:HGNC:26981]	chr13	43908669	44030461	1	q14.11	NRAD1	40.39	lncRNA	5160		1		1	1											0.52125	0.07814	0.36809	0.67441	0.27193	0.78567
ENSG00000270103	-	RNA, U11 small nuclear	chr1	28648600	28648730	1	p35.3	ENSG00000270103	51.91	lncRNA	131			1	1	1											0.51125	0.04214	0.42866	0.59384	0.26696	0.7895
ENSG00000268416	-	novel transcript	chr19	20746923	20755250	-1	p12	ENSG00000268416	46.35	lncRNA	8328		1		1	1											0.51438	0.05492	0.40674	0.62201	0.26177	0.7935
ENSG00000256166	-	long intergenic non-protein coding RNA 2571 [Source:HGNC Symbol;Acc:HGNC:53630]	chr6	31293908	31301642	-1	p21.33	LINC02571	39.15	lncRNA	536		1		1	1											0.51875	0.0783	0.36529	0.67221	0.23947	0.81074
ENSG00000260599	-	novel transcript	chr19	22520995	22527949	-1	p12	ENSG00000260599	46.14	lncRNA	3355		1		1	1											0.50812	0.03516	0.4392	0.57705	0.23106	0.81727
ENSG00000230102	-	long intergenic non-protein coding RNA 2028 [Source:HGNC Symbol;Acc:HGNC:27718]	chr3	194005259	194071025	-1	q29	LINC02028	45.47	lncRNA	10693		1		1	1											0.51813	0.07974	0.36183	0.67442	0.22729	0.8202
ENSG00000215417	[270]	miR-17-92a-1 cluster host gene [Source:HGNC Symbol;Acc:HGNC:23564]	chr13	91347820	91354579	1	q31.3	MIR17HG	44.48	lncRNA	3774		1		1	1											0.48375	0.07787	0.33113	0.63637	-0.20869	0.83469
ENSG00000283108	-	novel transcript	chr19	9383581	9407055	-1	p13.2	ENSG00000283108	42.44	lncRNA	935		1		1	1											0.515	0.07468	0.36864	0.66136	0.20087	0.8408
ENSG00000261437	-	long intergenic non-protein coding RNA 2894 [Source:HGNC Symbol;Acc:HGNC:55364]	chr8	94637285	94639467	-1	q22.1	LINC02894	46.31	lncRNA	2183		1		1	1											0.51313	0.0654	0.38495	0.6413	0.2007	0.84093
ENSG00000262160	-	novel transcript, antisense to NFATC3	chr16	68225969	68229145	-1	q22.1	ENSG00000262160	43.03	lncRNA	3177		1		1	1											0.51562	0.07938	0.36005	0.6712	0.19685	0.84394
ENSG00000283259	-	novel transcript, antisense to TTC34	chr1	2773603	2776473	1	p36.32	ENSG00000283259	57.33	lncRNA	1565	1			1	1											0.505	0.0255	0.45502	0.55498	0.19606	0.84457
ENSG00000251364	-	novel transcript, antisense to OLFML1	chr11	7418826	7513644	-1	p15.4	ENSG00000251364	44.13	lncRNA	11336	1			1	1											0.515	0.07901	0.36014	0.66986	0.18984	0.84943
ENSG00000250159	-	novel transcript	chr5	137809780	137889394	-1	q31.2	ENSG00000250159	38.18	lncRNA	13133		1		1	1											0.485	0.07956	0.32907	0.64093	-0.18855	0.85045
ENSG00000247033	-	novel transcript, antisense to ZNRF1	chr16	75108601	75110712	-1	q23.1	ENSG00000247033	54.12	lncRNA	1666		1		1	1											0.51375	0.07384	0.36903	0.65847	0.18622	0.85227
ENSG00000227885	-	novel transcript	chr6	53739266	53794904	-1	p12.1	ENSG00000227885	38.55	lncRNA	5141		1		1	1											0.51437	0.08068	0.35625	0.6725	0.17817	0.85859
ENSG00000272735	-	novel transcript	chr2	71067519	71068125	-1	p13.3	ENSG00000272735	53.38	lncRNA	607		1		1	1											0.48625	0.07773	0.3339	0.6386	-0.17689	0.85959
ENSG00000221953	-	chromosome 1 open reading frame 229 [Source:HGNC Symbol;Acc:HGNC:33759]	chr1	247110160	247112417	-1	q44	C1orf229	64.53	lncRNA	2258		1		1	1											0.51375	0.07932	0.35829	0.66921	0.17335	0.86237
ENSG00000247735	-	novel transcript, antisense to KCTD13	chr16	29926836	29928933	1	p11.2	ENSG00000247735	47.76	lncRNA	1762		1		1	1											0.51312	0.07986	0.35659	0.66966	0.16434	0.86946
ENSG00000261302	-	NUP93 divergent transcript [Source:HGNC Symbol;Acc:HGNC:55370]	chr16	56708450	56730010	-1	q13	NUP93-DT	42.6	lncRNA	1565		1		1	1											0.4875	0.07836	0.33393	0.64107	-0.15953	0.87325
ENSG00000261026	-	novel transcript, overlapping to EGR3	chr8	22679013	22684009	-1	p21.3	ENSG00000261026	49.75	lncRNA	4997			1	1	1											0.51125	0.07265	0.36886	0.65364	0.15486	0.87693
ENSG00000260331	-	novel transcript	chr2	18547386	18548204	-1	p24.2	ENSG00000260331	33.21	lncRNA	819		1		1	1											0.48812	0.07693	0.33735	0.6389	-0.15437	0.87732
ENSG00000236673	-	novel transcript	chr6	131901963	131920565	1	q23.2	ENSG00000236673	42.82	lncRNA	3017		1		1	1											0.50375	0.02529	0.45419	0.55331	0.1483	0.88211
ENSG00000231890	-	DARS1 antisense RNA 1 [Source:HGNC Symbol;Acc:HGNC:40170]	chr2	135985176	136022593	1	q21.3	DARS1-AS1	42.51	lncRNA	6566		1		1	1											0.51125	0.07822	0.35794	0.66456	0.14383	0.88564
ENSG00000250917	-	novel transcript, overlapping AHCY	chr20	34234840	34281173	-1	q11.22	ENSG00000250917	44.91	lncRNA	478		1		1	1											0.51062	0.07795	0.35784	0.66341	0.1363	0.89158
ENSG00000227354	[271]	RBM26 antisense RNA 1 [Source:HGNC Symbol;Acc:HGNC:39805]	chr13	79406293	79427317	1	q31.1	RBM26-AS1	37.59	lncRNA	6752		1		1	1											0.48938	0.07935	0.33386	0.64489	-0.13391	0.89348
ENSG00000246145	-	RRS1 antisense RNA 1 (head to head) [Source:HGNC Symbol;Acc:HGNC:50465]	chr8	66419589	66428977	-1	q13.1	RRS1-AS1	41.12	lncRNA	4366		1		1	1											0.49	0.07767	0.33777	0.64223	-0.12875	0.89756
ENSG00000253671	-	novel transcript	chr8	17808361	17822183	1	p22	ENSG00000253671	36.92	lncRNA	4166		1		1	1											0.51	0.07884	0.35549	0.66451	0.12685	0.89906
ENSG00000232850	-	PTGES2 antisense RNA 1 (head to head) [Source:NCBI gene (formerly Entrezgene);Acc:389791]	chr9	128128529	128130628	1	q34.11	PTGES2-AS1	53.81	lncRNA	2100		1		1	1											0.50625	0.0502	0.40786	0.60464	0.1245	0.90092
ENSG00000228043	-	novel transcript	chr2	138418284	138501698	-1	q22.1	ENSG00000228043	38.27	lncRNA	1313		1		1	1											0.50937	0.08166	0.34932	0.66943	0.1148	0.9086
ENSG00000258450	-	novel transcript	chr14	49629291	49629890	-1	q21.3	ENSG00000258450	50.17	lncRNA	401		1		1	1											0.49188	0.07525	0.3444	0.63935	-0.10798	0.91401
ENSG00000204584	-	novel transcript, antisense to TAC4	chr17	49845910	49848837	1	q21.33	ENSG00000204584	51.71	lncRNA	2100		1		1	1											0.5075	0.07774	0.35513	0.65987	0.09647	0.92314
ENSG00000260589	-	STAM antisense RNA 1 (head to head) [Source:HGNC Symbol;Acc:HGNC:49568]	chr10	17641284	17643878	-1	p12.33	STAM-AS1	38.61	lncRNA	2595		1		1	1											0.5075	0.08029	0.35013	0.66487	0.09341	0.92558
ENSG00000225742	-	long intergenic non-protein coding RNA 2036 [Source:HGNC Symbol;Acc:HGNC:52876]	chr3	194202392	194250203	-1	q29	LINC02036	44.64	lncRNA	3502		1		1	1											0.50688	0.07778	0.35442	0.65933	0.08839	0.92957
ENSG00000279064	-	novel transcript	chr21	5707004	5709456	-1	p12	ENSG00000279064	42.07	lncRNA	457		1		1	1											0.50688	0.07823	0.35355	0.6602	0.08789	0.92997
ENSG00000234028	-	EIF2AK3 divergent transcript [Source:HGNC Symbol;Acc:HGNC:54066]	chr2	88627539	88631821	1	p11.2	EIF2AK3-DT	43.71	lncRNA	4283		1		1	1											0.50688	0.07826	0.35349	0.66026	0.08785	0.93
ENSG00000245466	-	novel transcript	chr14	70608798	70641298	-1	q24.2	ENSG00000245466	39.24	lncRNA	2941		1		1	1											0.50625	0.07669	0.35595	0.65655	0.0815	0.93504
ENSG00000269680	-	novel transcript, antisense to TRIP10	chr19	6748293	6751467	-1	p13.3	ENSG00000269680	51.28	lncRNA	686		1		1	1											0.49375	0.07852	0.33985	0.64765	-0.07959	0.93656
ENSG00000229267	-	small nucleolar RNA host gene 31 [Source:HGNC Symbol;Acc:HGNC:54196]	chr2	214810181	214963575	1	q35	SNHG31	38.52	lncRNA	2553		1		1	1											0.50625	0.08017	0.34912	0.66338	0.07796	0.93786
ENSG00000218416	-	novel transcript, antisense to GPC1	chr2	240449315	240456714	-1	q37.3	ENSG00000218416	65.68	lncRNA	3235		1		1	1											0.49437	0.07951	0.33854	0.65021	-0.07075	0.9436
ENSG00000225506	-	CYP4A22 antisense RNA 1 [Source:HGNC Symbol;Acc:HGNC:43715]	chr1	47096653	47179271	-1	p33	CYP4A22-AS1	41.62	lncRNA	921		1		1	1											0.505	0.0785	0.35113	0.65887	0.06369	0.94922
ENSG00000224031	-	TCEAL3 antisense RNA 1 [Source:HGNC Symbol;Acc:HGNC:41191]	chrX	103626076	103626492	-1	q22.2	TCEAL3-AS1	37.41	lncRNA	361		1		1	1											0.49562	0.07794	0.34286	0.64839	-0.05613	0.95524
ENSG00000221857	-	novel transcript	chr19	35138824	35151336	1	q13.12	ENSG00000221857	55.33	lncRNA	735	1			1	1											0.4975	0.04465	0.40999	0.58501	-0.05599	0.95535
ENSG00000233593	-	long intergenic non-protein coding RNA 2609 [Source:HGNC Symbol;Acc:HGNC:27140]	chr1	90769086	90851658	-1	p22.2	LINC02609	41.67	lncRNA	14354		1		1	1											0.50438	0.07956	0.34844	0.66031	0.05499	0.95615
ENSG00000225527	-	novel transcript	chr10	18531849	18533336	-1	p12.31	ENSG00000225527	37.37	lncRNA	413		1		1	1											0.49688	0.06377	0.3719	0.62185	-0.04901	0.96091
ENSG00000246792	-	novel transcript	chr8	90646420	90670929	1	q21.3	ENSG00000246792	39.35	lncRNA	4472		1		1	1											0.50375	0.07758	0.3517	0.6558	0.04834	0.96145
ENSG00000258752	-	novel transcript, antisense to FOXN3	chr14	89349377	89366081	1	q32.11	ENSG00000258752	46.61	lncRNA	3197		1		1	1											0.49688	0.07527	0.34935	0.6444	-0.04152	0.96688
ENSG00000272953	-	novel transcript	chr7	5425770	5426401	1	p22.1	ENSG00000272953	54.91	lncRNA	632		1		1	1											0.49687	0.07656	0.34682	0.64693	-0.04082	0.96744
ENSG00000240996	[169]	novel transcript	chr10	89694295	89697928	-1	q23.31	ENSG00000240996	36.1	lncRNA	667		1		1	1											0.49687	0.07946	0.34113	0.65262	-0.03933	0.96863
ENSG00000224093	-	BCAR3 antisense RNA 1 [Source:HGNC Symbol;Acc:HGNC:40093]	chr1	93592199	93605573	1	p22.1	BCAR3-AS1	45.87	lncRNA	1954		1		1	1											0.5025	0.07883	0.348	0.657	0.03171	0.9747
ENSG00000259508	-	novel transcript	chr14	102770040	102774791	-1	q32.32	ENSG00000259508	53.11	lncRNA	1006		1		1	1											0.50125	0.04978	0.40369	0.59881	0.02511	0.97997
ENSG00000271335	-	CCNY antisense RNA 1 [Source:HGNC Symbol;Acc:HGNC:55252]	chr10	35314552	35336401	-1	p11.21	CCNY-AS1	42.38	lncRNA	1426		1		1	1											0.49813	0.07778	0.34568	0.65057	-0.02411	0.98077
ENSG00000265069	-	novel transcript, antisense to LAMA1	chr18	6954677	6957419	1	p11.31	ENSG00000265069	50.49	lncRNA	2295	1			1	1											0.50062	0.05653	0.38984	0.61141	0.01106	0.99118
ENSG00000255559	[272]	ZNF252P antisense RNA 1 [Source:HGNC Symbol;Acc:HGNC:27821]	chr8	145002811	145006046	1	q24.3	ZNF252P-AS1	48.67	lncRNA	3236		1		1	1											0.49938	0.07608	0.35026	0.64849	-0.00821	0.99345
ENSG00000233175	-	novel transcript, antisense to FMNL1	chr17	45238028	45241734	-1	q21.31	ENSG00000233175	55.95	lncRNA	2293		1		1	1											0.49937	0.07974	0.34308	0.65567	-0.00784	0.99375
ENSG00000256443	-	novel transcript	chr11	61539516	61542259	-1	q12.2	ENSG00000256443	55.69	lncRNA	1831		1		1	1											0.5	0.08368	0.33598	0.66402	0	1
ENSG00000254362	-	novel transcript	chr8	26440491	26442595	1	p21.2	ENSG00000254362	49.31	lncRNA	568		1		1	1											0.5	0.07916	0.34484	0.65516	0	1
ENSG00000225791	[273]	TRAM2 antisense RNA 1 (head to head) [Source:HGNC Symbol;Acc:HGNC:48663]	chr6	52576787	52643058	1	p12.2	TRAM2-AS1	41.44	lncRNA	8603		1		1	1											NA	NA	NA	NA	NA	NA
ENSG00000235499	-	novel transcript (LOC100132318)	chr2	73985132	73986343	1	p13.1	ENSG00000235499	69.31	lncRNA	390		1		1	1											0.5	0	0.5	0.5	NA	NA
ENSG00000291084	-	Arachidonate 12-lipoxygenase pseudogene 2	chr17	6853861	6954107	1		ALOX12P2		lncRNA		1			1	1
ENSG00000290920	-	Novel transcript	chr22	23390605	23402726	-1		ENSG00000290920		lncRNA				1	1	1
ENSG00000291149	-	Novel transcript	chr7	143721660	143836933	-1		ENSG00000291149		lncRNA				1	1	1

## Sheet: "Switch"
												Up					Down					DESeq2					ROC
	Previous references in EOC	Gene_description	Chromosome_scaffold_name	Gene_start_bp	Gene_end_bp	Strand	Karyotype_band	Gene_name	Gene_GC_content	Gene_type	Gene_Length	Asc_OV	Met_OV	Met_Asc	# comparisons	# studies	Asc_OV	Met_OV	Met_Asc	# comparisons	# studies	baseMean	log2FoldChange	lfcSE	pvalue	padj	AUC	SE.AUC	LowerLimit	UpperLimit	z	p-value
ENSG00000263753	[12]	long intergenic non-protein coding RNA 667 [Source:HGNC Symbol;Acc:HGNC:27906]	chr18	5237826	5290608	1	p11.31	LINC00667	38.71	lncRNA	10094	1			1	1			1	1	1						0.52125	0.0786	0.36719	0.67531	0.27035	0.78689
ENSG00000251562	[22]	metastasis associated lung adenocarcinoma transcript 1 [Source:HGNC Symbol;Acc:HGNC:29665]	chr11	65497688	65506516	1	q13.1	MALAT1	40.56	lncRNA	8829			1	1	1	1			1	1						0.50125	0.07985	0.34475	0.65775	0.01565	0.98751
ENSG00000253982	-	novel transcript	chr8	1761054	1764508	-1	p23.3	CLN8-AS1	60.43	lncRNA	2264	1			1	1			1	1	1						0.4525	0.07989	0.29591	0.60909	-0.59454	0.55215
ENSG00000245060	-	long intergenic non-protein coding RNA 847 [Source:HGNC Symbol;Acc:HGNC:45050]	chr5	180830326	180839742	1	q35.3	LINC00847	47.45	lncRNA	6088	1			1	1			1	1	1						0.505	0.07868	0.35079	0.65921	0.06355	0.94933
ENSG00000271614	[178]	ATP2B1 antisense RNA 1 [Source:HGNC Symbol;Acc:HGNC:27883]	chr12	89708959	89712590	1	q21.33	ATP2B1-AS1	48.4	lncRNA	3632	1			1	1			1	1	1						0.48438	0.07795	0.3316	0.63715	-0.20045	0.84113
ENSG00000259153	-	novel transcript	chr14	70809841	70815994	1	q24.2	ENSG00000259153	41.47	lncRNA	1718	1			1	1			1	1	1						0.4975	0.07823	0.34418	0.65082	-0.03196	0.97451
ENSG00000182165	-	TP53 target 1 [Source:HGNC Symbol;Acc:HGNC:17026]	chr7	87322943	87345528	-1	q21.12	TP53TG1	38.89	lncRNA	5871	1			1	1			1	1	1						0.435	0.07791	0.28229	0.58771	-0.83424	0.40414
ENSG00000247095	[274]	MIR210 host gene [Source:HGNC Symbol;Acc:HGNC:39524]	chr11	565660	568457	-1	p15.5	MIR210HG	61.54	lncRNA	2321	1			1	1			1	1	1						0.4675	0.07782	0.31497	0.62003	-0.41762	0.67622
ENSG00000275210	-	novel transcript	chr19	54308915	54337168	-1	q13.42	ENSG00000275210	48.3	lncRNA	1734	1			1	1			1	1	1						0.50438	0.02538	0.45463	0.55412	0.17238	0.86314
ENSG00000243655	-	novel transcript, antisense to MTRNR2L1	chr17	22524563	22525330	-1	p11.2	ENSG00000243655	42.58	lncRNA	504	1			1	1			1	1	1						0.5	0	0.5	0.5	NA	NA
ENSG00000291135	-	Fc gamma receptor Ib, pseudogene	chr1	121087298	121097161	1		FCGR1BP		lncRNA		1			1	1			1	1	1
ENSG00000291106	-	Long intergenic non-protein coding RNA 888	chr3	183447582	183456017	1		LINC00888		lncRNA		1			1	1			1	1	1
ENSG00000291107	-	Novel transcript	chr12	9648047	9658412	1		ENSG00000291107		lncRNA		1			1	1			1	1	1
ENSG00000291230	-	Novel transcript	chr19	50333796	50344806	-1		ENSG00000291230		lncRNA		1			1	1			1	1	1
ENSG00000214548	[275]	maternally expressed 3 [Source:HGNC Symbol;Acc:HGNC:14575]	chr14	100779410	100861031	1	q32.2	MEG3	51.68	lncRNA	23224			1	1	1	1			1	1						0.60812	0.07793	0.45539	0.76086	1.38751	0.16529
ENSG00000179818	[34]	PCBP1 antisense RNA 1 [Source:HGNC Symbol;Acc:HGNC:42948]	chr2	69960104	70103220	-1	p13.3	PCBP1-AS1	45.99	lncRNA	32764			1	1	1	1			1	1						0.58938	0.07682	0.43881	0.73994	1.1634	0.24467
ENSG00000223774	-	novel transcript	chr1	201893842	201899978	1	q32.1	ENSG00000223774	54.31	lncRNA	671			1	1	1	1			1	1						0.56563	0.07405	0.42048	0.71077	0.88617	0.37552
ENSG00000275620	-	uncharacterized LOC100192386 [Source:NCBI gene (formerly Entrezgene);Acc:100192386]	chr20	63253978	63261615	1	q13.33	FLJ16779	61.9	lncRNA	7638			1	1	1	1			1	1						0.55875	0.0753	0.41116	0.70634	0.78021	0.43527
ENSG00000263065	-	novel transcript, antisense to MYH11	chr16	15741151	15741791	1	p13.11	ENSG00000263065	56.47	lncRNA	550			1	1	1	1			1	1						0.45562	0.06677	0.32477	0.58648	-0.66463	0.50628
ENSG00000197989	[276]	small nucleolar RNA host gene 12 [Source:HGNC Symbol;Acc:HGNC:30062]	chr1	28578538	28583132	-1	p35.3	SNHG12	50.99	lncRNA	4266			1	1	1	1			1	1						0.54875	0.07759	0.39668	0.70082	0.62832	0.5298
ENSG00000245067	-	IGFBP7 antisense RNA 1 [Source:HGNC Symbol;Acc:HGNC:40296]	chr4	57109762	57207459	1	q12	IGFBP7-AS1	43.21	lncRNA	3689			1	1	1	1			1	1						0.45562	0.0741	0.31038	0.60087	-0.59882	0.54929
ENSG00000232656	[247]	IDI2 antisense RNA 1 [Source:HGNC Symbol;Acc:HGNC:30885]	chr10	1022630	1045425	1	p15.3	IDI2-AS1	42.35	lncRNA	3348			1	1	1	1			1	1						0.52688	0.07933	0.37139	0.68236	0.33877	0.73478
ENSG00000257621	[277]	PSMA3 antisense RNA 1 [Source:HGNC Symbol;Acc:HGNC:26445]	chr14	58265365	58298134	-1	q23.1	PSMA3-AS1	38.57	lncRNA	7409			1	1	1	1			1	1						0.51625	0.07962	0.3602	0.6723	0.20409	0.83828
ENSG00000225484	-	NUTM2B antisense RNA 1 [Source:HGNC Symbol;Acc:HGNC:51204]	chr10	79661394	79826594	-1	q22.3	NUTM2B-AS1	39.62	lncRNA	22490			1	1	1	1			1	1						0.48563	0.08008	0.32866	0.64259	-0.1795	0.85755
ENSG00000242125	-	small nucleolar RNA host gene 3 [Source:HGNC Symbol;Acc:HGNC:10118]	chr1	28505980	28510892	1	p35.3	SNHG3	46.41	lncRNA	4088			1	1	1	1			1	1						0.51125	0.0788	0.3568	0.6657	0.14276	0.88648
ENSG00000291266	-	SMG1 pseudogene 5	chr16	30285018	30335395	-1		SMG1P5		lncRNA				1	1	1	1			1	1
