# Supplementary material for: Identification of lncRNAs Deregulated in Epithelial Ovarian Cancer Based on a Gene Expression Profiling Meta-Analysis
Source: Int J Mol Sci. 2023 Jun 28;24(13):10798. doi: 10.3390/ijms241310798 (PMC10341812; doi:10.3390/ijms241310798)
Supplement: Supplementary file 1 [file ijms-24-10798-s001.zip › Supplementary Table S9.xlsx]

## Sheet: STS9 Title
	Supplementary Table S9.- List of studies used in the “Drug resistance” meta analysis with study information and results from the individual analyses.

## Sheet: TS9 Study information
Series	Country	Year	Platform	Sample source	Subtype	Resistant	Sensitive	Reference
GSE51373	Canada	2013	Affymetrix Human Genome U133 Plus 2.0 Array	Tissue	High grade serous	12	16	[278]
GSE63885	Poland	2014	Affymetrix Human Genome U133 Plus 2.0 Array	Tissue	Serous, endometrioid, clear cell and undifferentiated	34	41	[200]
GSE30161	USA	2011	Affymetrix Human Genome U133 Plus 2.0 Array	Tissue	-	22	31	[201]

## Sheet: GSE51373
Parametric p-value	FDR	Resistant	Sensitive	Fold-change	ProbeSet	Gene_ID	Gene_description	Chromosome_scaffold_name	Gene_start_bp	Gene_end_bp	Strand	Karyotype_band	Gene_name	Gene_GC_content	Gene_type	Gene_Length
0.0004174	0.662	169	70.34	2.4	212607_at	ENSG00000117020	AKT serine/threonine kinase 3 [Source:HGNC Symbol;Acc:HGNC:393]	chr1	243488233	243851079	-1	q44	AKT3	37.34	protein_coding	16643
0.0007574	0.662	255.7	99.94	2.56	212609_s_at	ENSG00000117020	AKT serine/threonine kinase 3 [Source:HGNC Symbol;Acc:HGNC:393]	chr1	243488233	243851079	-1	q44	AKT3	37.34	protein_coding	16643
0.0017427	0.662	138.13	66.35	2.08	223126_s_at	ENSG00000116667	chromosome 1 open reading frame 21 [Source:HGNC Symbol;Acc:HGNC:15494]	chr1	184387029	184629019	1	q25.3	C1orf21	40.27	protein_coding	11594
0.0020192	0.662	407.19	217.55	1.87	223125_s_at	ENSG00000116667	chromosome 1 open reading frame 21 [Source:HGNC Symbol;Acc:HGNC:15494]	chr1	184387029	184629019	1	q25.3	C1orf21	40.27	protein_coding	11594
0.0057998	0.662	74.44	36.86	2.02	221272_s_at	ENSG00000116667	chromosome 1 open reading frame 21 [Source:HGNC Symbol;Acc:HGNC:15494]	chr1	184387029	184629019	1	q25.3	C1orf21	40.27	protein_coding	11594
0.0063108	0.662	53.46	28.31	1.89	214841_at	ENSG00000143786	cornichon family AMPA receptor auxiliary protein 3 [Source:HGNC Symbol;Acc:HGNC:26802]	chr1	224434660	224740554	1	q42.12	CNIH3	44.14	protein_coding	6367
0.0022651	0.662	513.45	175.21	2.93	225442_at	ENSG00000162733	discoidin domain receptor tyrosine kinase 2 [Source:HGNC Symbol;Acc:HGNC:2731]	chr1	162631373	162787405	1	q23.3	DDR2	40.47	protein_coding	11099
0.0067351	0.665	135.55	201.37	0.67	1559023_a_at	ENSG00000159658	EF-hand calcium binding domain 14 [Source:HGNC Symbol;Acc:HGNC:29051]	chr1	46674659	46719146	-1	p33	EFCAB14	40.28	protein_coding	16312
0.0083164	0.665	68.54	27.31	2.51	228268_at	ENSG00000094963	flavin containing dimethylaniline monoxygenase 2 [Source:HGNC Symbol;Acc:HGNC:3770]	chr1	171185249	171212686	1	q24.3	FMO2	38.85	protein_coding	6201
0.0027553	0.662	311.38	434.29	0.72	203205_at	ENSG00000066135	lysine demethylase 4A [Source:HGNC Symbol;Acc:HGNC:22978]	chr1	43650149	43705518	1	p34.2	KDM4A	46.76	protein_coding	5184
0.0044074	0.662	127.46	250.57	0.51	236641_at	ENSG00000118193	kinesin family member 14 [Source:HGNC Symbol;Acc:HGNC:19181]	chr1	200551497	200620751	-1	q32.1	KIF14	37.83	protein_coding	7294
0.0058135	0.662	114.09	220.14	0.52	206364_at	ENSG00000118193	kinesin family member 14 [Source:HGNC Symbol;Acc:HGNC:19181]	chr1	200551497	200620751	-1	q32.1	KIF14	37.83	protein_coding	7294
0.0053187	0.662	143.56	66.99	2.14	203766_s_at	ENSG00000163431	leiomodin 1 [Source:HGNC Symbol;Acc:HGNC:6647]	chr1	201896456	201946588	-1	q32.1	LMOD1	48.52	protein_coding	3967
0.0052094	0.662	238.1	68.93	3.45	230174_at	ENSG00000143353	lysophospholipase like 1 [Source:HGNC Symbol;Acc:HGNC:20440]	chr1	219173869	219212865	1	q41	LYPLAL1	33.93	protein_coding	2941
0.006792	0.665	24.25	38.26	0.63	217544_at	ENSG00000283881	microRNA 3916 [Source:HGNC Symbol;Acc:HGNC:38912]	chr1	247201967	247202060	-1	q44	MIR3916	47.87	miRNA	94
0.0069316	0.665	161.92	273.12	0.59	203347_s_at	ENSG00000143033	metal response element binding transcription factor 2 [Source:HGNC Symbol;Acc:HGNC:29535]	chr1	93079235	93139079	1	p22.1	MTF2	37.37	protein_coding	5907
0.0097515	0.665	65.67	108.49	0.61	215491_at	ENSG00000116990	MYCL proto-oncogene, bHLH transcription factor [Source:HGNC Symbol;Acc:HGNC:7555]	chr1	39895426	39902256	-1	p34.2	MYCL	53.68	protein_coding	5063
0.0030721	0.662	40.05	63.62	0.63	238231_at	ENSG00000066136	nuclear transcription factor Y subunit gamma [Source:HGNC Symbol;Acc:HGNC:7806]	chr1	40691648	40771603	1	p34.2	NFYC	42.65	protein_coding	5990
0.0045152	0.662	267.08	486.8	0.55	223381_at	ENSG00000143228	NUF2 component of NDC80 kinetochore complex [Source:HGNC Symbol;Acc:HGNC:14621]	chr1	163266576	163355764	1	q23.3	NUF2	36.44	protein_coding	3362
0.0068518	0.665	53.11	30.18	1.76	204879_at	ENSG00000162493	podoplanin [Source:HGNC Symbol;Acc:HGNC:29602]	chr1	13583465	13617957	1	p36.21	PDPN	45.38	protein_coding	3707
0.0083577	0.665	172.17	270.76	0.64	230270_at	ENSG00000134186	pre-mRNA processing factor 38B [Source:HGNC Symbol;Acc:HGNC:25512]	chr1	108692310	108702928	1	p13.3	PRPF38B	38.13	protein_coding	6955
0.0045253	0.662	1727.44	2512.05	0.69	224578_at	ENSG00000179051	regulator of chromosome condensation 2 [Source:HGNC Symbol;Acc:HGNC:30297]	chr1	17406760	17439677	-1	p36.13	RCC2	51.69	protein_coding	4079
0.0061588	0.662	85.16	48.39	1.76	229910_at	ENSG00000169291	Src homology 2 domain containing E [Source:HGNC Symbol;Acc:HGNC:27004]	chr1	154469772	154502412	-1	q21.3	SHE	45.3	protein_coding	8740
0.0079979	0.665	382.28	590.03	0.65	203016_s_at	ENSG00000117155	SSX family member 2 interacting protein [Source:HGNC Symbol;Acc:HGNC:16509]	chr1	84643706	84690803	-1	p22.3	SSX2IP	37.23	protein_coding	8563
0.0088262	0.665	566.75	771.7	0.73	218617_at	ENSG00000043514	tRNA isopentenyltransferase 1 [Source:HGNC Symbol;Acc:HGNC:20286]	chr1	39838110	39883511	-1	p34.2	TRIT1	42.31	protein_coding	6533
0.0024868	0.662	162.27	270.94	0.6	204407_at	ENSG00000116830	transcription termination factor 2 [Source:HGNC Symbol;Acc:HGNC:12398]	chr1	117060326	117107453	1	p13.1	TTF2	41.15	protein_coding	10158
0.0048808	0.662	215.78	53.94	4	213429_at	ENSG00000122870	BicC family RNA binding protein 1 [Source:HGNC Symbol;Acc:HGNC:19351]	chr10	58512872	58831435	1	q21.1	BICC1	38	protein_coding	6835
0.0071981	0.665	251.38	105.93	2.37	205249_at	ENSG00000122877	early growth response 2 [Source:HGNC Symbol;Acc:HGNC:3239]	chr10	62811996	62919900	-1	q21.3	EGR2	42.64	protein_coding	4060
0.0084652	0.665	189.16	86.95	2.18	204396_s_at	ENSG00000198873	G protein-coupled receptor kinase 5 [Source:HGNC Symbol;Acc:HGNC:4544]	chr10	119207571	119459745	1	q26.11	GRK5	50.47	protein_coding	7021
0.0008469	0.662	28.26	12.09	2.34	238763_at	ENSG00000203867	RNA binding motif protein 20 [Source:HGNC Symbol;Acc:HGNC:27424]	chr10	110644336	110839468	1	q25.2	RBM20	43.94	protein_coding	8222
0.0094159	0.665	206.22	276.51	0.75	219957_at	ENSG00000204130	RUN and FYVE domain containing 2 [Source:HGNC Symbol;Acc:HGNC:19761]	chr10	68341107	68407294	-1	q21.3	RUFY2	40.87	protein_coding	8137
0.0064272	0.665	382.32	138.52	2.76	212764_at	ENSG00000148516	zinc finger E-box binding homeobox 1 [Source:HGNC Symbol;Acc:HGNC:11642]	chr10	31318495	31529814	1	p11.22	ZEB1	36.04	protein_coding	8650
0.007878	0.665	155.04	108.21	1.43	43511_s_at	ENSG00000137486	arrestin beta 1 [Source:HGNC Symbol;Acc:HGNC:711]	chr11	75260122	75351705	-1	q13.4	ARRB1	52.02	protein_coding	9888
0.000335	0.662	765.49	237.07	3.23	227099_s_at	ENSG00000187479	chromosome 11 open reading frame 96 [Source:HGNC Symbol;Acc:HGNC:38675]	chr11	43925342	43943878	1	p11.2	C11orf96	53.15	protein_coding	1913
0.0045709	0.662	1817.93	1159.91	1.57	201432_at	ENSG00000121691	catalase [Source:HGNC Symbol;Acc:HGNC:1516]	chr11	34438934	34472060	1	p13	CAT	40.59	protein_coding	3579
0.0038214	0.662	1943.8	1156.25	1.68	200985_s_at	ENSG00000085063	CD59 molecule (CD59 blood group) [Source:HGNC Symbol;Acc:HGNC:1689]	chr11	33703010	33736479	-1	p13	CD59	43.12	protein_coding	10557
0.0081655	0.665	1072.05	669.95	1.6	200984_s_at	ENSG00000085063	CD59 molecule (CD59 blood group) [Source:HGNC Symbol;Acc:HGNC:1689]	chr11	33703010	33736479	-1	p13	CD59	43.12	protein_coding	10557
0.008451	0.665	2545.79	1435.91	1.77	200983_x_at	ENSG00000085063	CD59 molecule (CD59 blood group) [Source:HGNC Symbol;Acc:HGNC:1689]	chr11	33703010	33736479	-1	p13	CD59	43.12	protein_coding	10557
0.0058464	0.662	7668.16	5352.8	1.43	200675_at	ENSG00000110651	CD81 molecule [Source:HGNC Symbol;Acc:HGNC:1701]	chr11	2376177	2397397	1	p15.5	CD81	63.43	protein_coding	7356
0.00932	0.665	273.24	411.76	0.66	224753_at	ENSG00000146670	cell division cycle associated 5 [Source:HGNC Symbol;Acc:HGNC:14626]	chr11	65066300	65084164	-1	q13.1	CDCA5	52.67	protein_coding	3901
0.0056845	0.662	103.37	29.89	3.46	226834_at	ENSG00000166250	CXADR like membrane protein [Source:HGNC Symbol;Acc:HGNC:24039]	chr11	123069872	123195248	-1	q24.1	CLMP	45.03	protein_coding	5057
0.00145	0.662	83.01	54.75	1.52	218892_at	ENSG00000166341	dachsous cadherin-related 1 [Source:HGNC Symbol;Acc:HGNC:13681]	chr11	6621330	6655809	-1	p15.4	DCHS1	52.61	protein_coding	10783
0.0048718	0.662	287.67	135.91	2.12	222101_s_at	ENSG00000166341	dachsous cadherin-related 1 [Source:HGNC Symbol;Acc:HGNC:13681]	chr11	6621330	6655809	-1	p15.4	DCHS1	52.61	protein_coding	10783
0.0062835	0.662	1263.15	429.82	2.94	214247_s_at	ENSG00000050165	dickkopf WNT signaling pathway inhibitor 3 [Source:HGNC Symbol;Acc:HGNC:2893]	chr11	11956207	12009769	-1	p15.3	DKK3	48.21	protein_coding	11958
0.0085425	0.665	87.22	47.29	1.84	221127_s_at	ENSG00000050165	dickkopf WNT signaling pathway inhibitor 3 [Source:HGNC Symbol;Acc:HGNC:2893]	chr11	11956207	12009769	-1	p15.3	DKK3	48.21	protein_coding	11958
0.0060291	0.662	612.57	877.3	0.7	204767_s_at	ENSG00000168496	flap structure-specific endonuclease 1 [Source:HGNC Symbol;Acc:HGNC:3650]	chr11	61792911	61797238	1	q12.2	FEN1	48.87	protein_coding	2198
0.0013116	0.662	162.54	56.93	2.85	203562_at	ENSG00000149557	fasciculation and elongation protein zeta 1 [Source:HGNC Symbol;Acc:HGNC:3659]	chr11	125442881	125592568	-1	q24.2	FEZ1	42.92	protein_coding	9324
0.0011099	0.662	460.39	167.88	2.74	212813_at	ENSG00000166086	junctional adhesion molecule 3 [Source:HGNC Symbol;Acc:HGNC:15532]	chr11	134069071	134152001	1	q25	JAM3	41.93	protein_coding	5305
0.0057195	0.662	91.46	43.24	2.12	1556427_s_at	ENSG00000177363	LRRN4 C-terminal like [Source:HGNC Symbol;Acc:HGNC:33724]	chr11	62686406	62689530	-1	q12.3	LRRN4CL	53.66	protein_coding	2212
0.0049624	0.662	23.8	10.44	2.28	222161_at	ENSG00000077616	N-acetylated alpha-linked acidic dipeptidase 2 [Source:HGNC Symbol;Acc:HGNC:14526]	chr11	90131515	90192894	1	q14.3	NAALAD2	34.98	protein_coding	7168
0.0056254	0.662	89.8	57.17	1.57	213661_at	ENSG00000149090	peptidase domain containing associated with muscle regeneration 1 [Source:HGNC Symbol;Acc:HGNC:24554]	chr11	35431823	35530300	-1	p13	PAMR1	41.96	protein_coding	3863
0.008563	0.665	239.3	63.77	3.75	228554_at	ENSG00000082175	progesterone receptor [Source:HGNC Symbol;Acc:HGNC:8910]	chr11	101029624	101129813	-1	q22.1	PGR	37.72	protein_coding	14693
0.0073546	0.665	903.39	654.95	1.38	206050_s_at	ENSG00000023191	ribonuclease/angiogenin inhibitor 1 [Source:HGNC Symbol;Acc:HGNC:10074]	chr11	494512	507300	-1	p15.5	RNH1	60.36	protein_coding	7374
0.0091983	0.665	21.76	14.09	1.54	236359_at	ENSG00000177098	sodium voltage-gated channel beta subunit 4 [Source:HGNC Symbol;Acc:HGNC:10592]	chr11	118133377	118152888	-1	q23.3	SCN4B	52.64	protein_coding	5649
0.007487	0.665	128.67	191.1	0.67	230623_x_at	ENSG00000048028	ubiquitin specific peptidase 28 [Source:HGNC Symbol;Acc:HGNC:12625]	chr11	113797874	113875570	-1	q23.2	USP28	41.45	protein_coding	5719
0.0061435	0.662	992.32	1482.56	0.67	222182_s_at	ENSG00000111596	CCR4-NOT transcription complex subunit 2 [Source:HGNC Symbol;Acc:HGNC:7878]	chr12	70243002	70354993	1	q15	CNOT2	35.15	protein_coding	13985
0.0095216	0.665	48.15	27.38	1.76	217404_s_at	ENSG00000139219	collagen type II alpha 1 chain [Source:HGNC Symbol;Acc:HGNC:2200]	chr12	47972967	48004554	-1	q13.11	COL2A1	55.38	protein_coding	6662
0.0060252	0.662	32.59	50.58	0.64	205676_at	ENSG00000111012	cytochrome P450 family 27 subfamily B member 1 [Source:HGNC Symbol;Acc:HGNC:2606]	chr12	57762334	57768986	-1	q14.1	CYP27B1	53.92	protein_coding	3284
0.0054049	0.662	440.58	649.48	0.68	208159_x_at	ENSG00000013573	DEAD/H-box helicase 11 [Source:HGNC Symbol;Acc:HGNC:2736]	chr12	31073860	31104799	1	p11.21	DDX11	52.26	protein_coding	8367
0.0029729	0.662	806.12	349.57	2.31	202609_at	ENSG00000151491	epidermal growth factor receptor pathway substrate 8 [Source:HGNC Symbol;Acc:HGNC:3420]	chr12	15620134	15882329	-1	p12.3	EPS8	37.25	protein_coding	8540
0.0023928	0.662	331.7	631.54	0.53	202580_x_at	ENSG00000111206	forkhead box M1 [Source:HGNC Symbol;Acc:HGNC:3818]	chr12	2857680	2877174	-1	p13.33	FOXM1	48.09	protein_coding	4919
0.0057783	0.662	188.33	91.26	2.06	221447_s_at	ENSG00000120820	glycosyltransferase 8 domain containing 2 [Source:HGNC Symbol;Acc:HGNC:24890]	chr12	103988987	104064183	-1	q23.3	GLT8D2	41.92	protein_coding	3268
0.008631	0.665	327.24	108.67	3.01	227070_at	ENSG00000120820	glycosyltransferase 8 domain containing 2 [Source:HGNC Symbol;Acc:HGNC:24890]	chr12	103988987	104064183	-1	q23.3	GLT8D2	41.92	protein_coding	3268
0.0019585	0.662	40.56	79.89	0.51	207183_at	ENSG00000183150	G protein-coupled receptor 19 [Source:HGNC Symbol;Acc:HGNC:4473]	chr12	12660890	12696207	-1	p13.1	GPR19	41.27	protein_coding	2624
0.0060237	0.662	345.67	118.75	2.91	209541_at	ENSG00000017427	insulin like growth factor 1 [Source:HGNC Symbol;Acc:HGNC:5464]	chr12	102395874	102481744	-1	q23.2	IGF1	39.7	protein_coding	8115
0.0024279	0.662	82.6	43.16	1.91	205303_at	ENSG00000121361	potassium inwardly rectifying channel subfamily J member 8 [Source:HGNC Symbol;Acc:HGNC:6269]	chr12	21764955	21775600	-1	p12.1	KCNJ8	40.64	protein_coding	2511
0.0068166	0.665	59.39	34.22	1.74	205304_s_at	ENSG00000121361	potassium inwardly rectifying channel subfamily J member 8 [Source:HGNC Symbol;Acc:HGNC:6269]	chr12	21764955	21775600	-1	p12.1	KCNJ8	40.64	protein_coding	2511
0.0047968	0.662	8.58	11.88	0.72	1559203_s_at	ENSG00000133703	KRAS proto-oncogene, GTPase [Source:HGNC Symbol;Acc:HGNC:6407]	chr12	25205246	25250936	-1	p12.1	KRAS	36.42	protein_coding	6845
0.0099489	0.665	40.81	65.3	0.62	220397_at	ENSG00000111554	Mdm1 nuclear protein [Source:HGNC Symbol;Acc:HGNC:29917]	chr12	68272443	68332381	-1	q15	MDM1	38.66	protein_coding	6551
0.0006377	0.662	1197.24	414.67	2.89	202291_s_at	ENSG00000111341	matrix Gla protein [Source:HGNC Symbol;Acc:HGNC:7060]	chr12	14880864	14885857	-1	p12.3	MGP	37.48	protein_coding	2887
0.004501	0.662	25.88	12.44	2.08	238481_at	ENSG00000111341	matrix Gla protein [Source:HGNC Symbol;Acc:HGNC:7060]	chr12	14880864	14885857	-1	p12.3	MGP	37.48	protein_coding	2887
0.0096217	0.665	162.2	306.4	0.53	223471_at	ENSG00000127328	RAB3A interacting protein [Source:HGNC Symbol;Acc:HGNC:16508]	chr12	69738860	69823204	1	q15	RAB3IP	38.23	protein_coding	12433
0.0017577	0.662	586.01	1030.79	0.57	204146_at	ENSG00000111247	RAD51 associated protein 1 [Source:HGNC Symbol;Acc:HGNC:16956]	chr12	4538798	4560047	1	p13.32	RAD51AP1	36.4	protein_coding	2557
0.0004795	0.662	68.37	121.58	0.56	230380_at	ENSG00000173451	THAP domain containing 2 [Source:HGNC Symbol;Acc:HGNC:20854]	chr12	71664301	71680644	1	q21.1	THAP2	35.68	protein_coding	5240
0.0023384	0.662	311.18	500.71	0.62	226860_at	ENSG00000139291	transmembrane protein 19 [Source:HGNC Symbol;Acc:HGNC:25605]	chr12	71686082	71705047	1	q21.1	TMEM19	39.6	protein_coding	6494
0.0008081	0.662	297.64	463.53	0.64	210681_s_at	ENSG00000135655	ubiquitin specific peptidase 15 [Source:HGNC Symbol;Acc:HGNC:12613]	chr12	62260338	62417431	1	q14.1	USP15	34.93	protein_coding	19418
0.0030565	0.662	58.41	112.52	0.52	216870_x_at	ENSG00000231607	deleted in lymphocytic leukemia 2 [Source:HGNC Symbol;Acc:HGNC:13748]	chr13	49956670	50125720	-1	q14.2	DLEU2	38.87	lncRNA	11574
0.0084908	0.665	307.72	136.78	2.25	218656_s_at	ENSG00000183722	LHFPL tetraspan subfamily member 6 [Source:HGNC Symbol;Acc:HGNC:6586]	chr13	39209116	39603528	-1	q14.11	LHFPL6	39.07	protein_coding	4564
0.0057282	0.662	138.29	50.62	2.73	221207_s_at	ENSG00000172915	neurobeachin [Source:HGNC Symbol;Acc:HGNC:7648]	chr13	34942270	35673022	1	q13.3	NBEA	35.01	protein_coding	11955
0.0088363	0.665	169.72	105.42	1.61	213103_at	ENSG00000133121	StAR related lipid transfer domain containing 13 [Source:HGNC Symbol;Acc:HGNC:19164]	chr13	33103137	33350630	-1	q13.1	STARD13	40.86	protein_coding	8386
0.0057046	0.662	129.04	87.09	1.48	235369_at	ENSG00000179476	chromosome 14 open reading frame 28 [Source:HGNC Symbol;Acc:HGNC:19834]	chr14	44897275	44907257	1	q21.2	C14orf28	36.67	protein_coding	3884
0.0019952	0.662	111.2	34.44	3.23	219179_at	ENSG00000165617	dishevelled binding antagonist of beta catenin 1 [Source:HGNC Symbol;Acc:HGNC:17748]	chr14	58633967	58648321	1	q23.1	DACT1	45.52	protein_coding	4584
0.0086828	0.665	328.46	461.07	0.71	213653_at	ENSG00000165819	methyltransferase like 3 [Source:HGNC Symbol;Acc:HGNC:17563]	chr14	21498133	21511342	-1	q11.2	METTL3	42.48	protein_coding	5861
0.0044793	0.662	64.87	100.93	0.64	206500_s_at	ENSG00000129534	MIS18 binding protein 1 [Source:HGNC Symbol;Acc:HGNC:20190]	chr14	45203190	45253540	-1	q21.2	MIS18BP1	37.65	protein_coding	6250
0.0019424	0.662	118.63	199.04	0.6	227409_at	ENSG00000235194	protein phosphatase 1 regulatory subunit 3E [Source:HGNC Symbol;Acc:HGNC:14943]	chr14	23295652	23302859	-1	q11.2	PPP1R3E	51.8	protein_coding	5550
0.0058433	0.662	88.84	61.54	1.44	234929_s_at	ENSG00000042317	spermatogenesis associated 7 [Source:HGNC Symbol;Acc:HGNC:20423]	chr14	88384924	88470350	1	q31.3	SPATA7	37.9	protein_coding	6872
0.0029702	0.662	1145.39	805.9	1.42	224445_s_at	ENSG00000100711	zinc finger FYVE-type containing 21 [Source:HGNC Symbol;Acc:HGNC:20760]	chr14	103715730	103733668	1	q32.33	ZFYVE21	56.98	protein_coding	8390
0.0007728	0.662	186.77	57.71	3.24	209789_at	ENSG00000103647	coronin 2B [Source:HGNC Symbol;Acc:HGNC:2256]	chr15	68578993	68727806	1	q23	CORO2B	49.34	protein_coding	3975
0.0045433	0.662	17.67	10.93	1.62	205782_at	ENSG00000140285	fibroblast growth factor 7 [Source:HGNC Symbol;Acc:HGNC:3685]	chr15	49423237	49488775	1	q21.2	FGF7	33.83	protein_coding	6516
0.0040564	0.662	224.02	90	2.49	216733_s_at	ENSG00000171766	glycine amidinotransferase [Source:HGNC Symbol;Acc:HGNC:4175]	chr15	45361124	45402327	-1	q21.1	GATM	40.25	protein_coding	9260
0.0031334	0.662	48.2	23.03	2.09	219894_at	ENSG00000254585	MAGE family member L2 [Source:HGNC Symbol;Acc:HGNC:6814]	chr15	23643549	23647867	-1	q11.2	MAGEL2	61.17	protein_coding	4319
0.0014249	0.662	25.63	10.91	2.35	206306_at	ENSG00000198838	ryanodine receptor 3 [Source:HGNC Symbol;Acc:HGNC:10485]	chr15	33310962	33866121	1	q13.3	RYR3	41.56	protein_coding	20353
0.0013863	0.662	131.89	179.37	0.74	220335_x_at	ENSG00000172828	carboxylesterase 3 [Source:HGNC Symbol;Acc:HGNC:1865]	chr16	66961245	66975149	1	q22.1	CES3	55.02	protein_coding	4928
0.002874	0.662	78.61	30.95	2.54	201496_x_at	ENSG00000133392	myosin heavy chain 11 [Source:HGNC Symbol;Acc:HGNC:7569]	chr16	15703135	15857028	-1	p13.11	MYH11	48.16	protein_coding	17729
0.004434	0.662	475.03	167.35	2.84	201497_x_at	ENSG00000133392	myosin heavy chain 11 [Source:HGNC Symbol;Acc:HGNC:7569]	chr16	15703135	15857028	-1	p13.11	MYH11	48.16	protein_coding	17729
0.0091353	0.665	228.39	129.57	1.76	207961_x_at	ENSG00000133392	myosin heavy chain 11 [Source:HGNC Symbol;Acc:HGNC:7569]	chr16	15703135	15857028	-1	p13.11	MYH11	48.16	protein_coding	17729
0.0096477	0.665	873.38	1232.45	0.71	219105_x_at	ENSG00000091651	origin recognition complex subunit 6 [Source:HGNC Symbol;Acc:HGNC:17151]	chr16	46689643	46698394	1	q11.2	ORC6	44.16	protein_coding	4309
0.0081268	0.665	1402.57	895.82	1.57	217949_s_at	ENSG00000167397	vitamin K epoxide reductase complex subunit 1 [Source:HGNC Symbol;Acc:HGNC:23663]	chr16	31090842	31095980	-1	p11.2	VKORC1	55.01	protein_coding	2190
0.0048852	0.662	88.41	20.9	4.23	204719_at	ENSG00000141338	ATP binding cassette subfamily A member 8 [Source:HGNC Symbol;Acc:HGNC:38]	chr17	68867289	68955392	-1	q24.2	ABCA8	36.81	protein_coding	11246
0.0022934	0.662	12.57	20.76	0.61	1554594_at	ENSG00000159314	Rho GTPase activating protein 27 [Source:HGNC Symbol;Acc:HGNC:31813]	chr17	45393902	45434421	-1	q21.31	ARHGAP27	54.68	protein_coding	10426
0.0047751	0.662	116.92	193.87	0.6	235609_at	ENSG00000136492	BRCA1 interacting protein C-terminal helicase 1 [Source:HGNC Symbol;Acc:HGNC:20473]	chr17	61679139	61863559	-1	q23.2	BRIP1	35.96	protein_coding	19639
0.0040552	0.662	95.89	150.3	0.64	236134_at	ENSG00000136485	DDB1 and CUL4 associated factor 7 [Source:HGNC Symbol;Acc:HGNC:30915]	chr17	63550477	63594279	1	q23.3	DCAF7	43.95	protein_coding	6572
0.0048029	0.662	120.4	171.22	0.7	221745_at	ENSG00000136485	DDB1 and CUL4 associated factor 7 [Source:HGNC Symbol;Acc:HGNC:30915]	chr17	63550477	63594279	1	q23.3	DCAF7	43.95	protein_coding	6572
0.0060238	0.662	132.99	91.1	1.46	228967_at	ENSG00000173812	eukaryotic translation initiation factor 1 [Source:HGNC Symbol;Acc:HGNC:3249]	chr17	41688885	41692668	1	q21.2	EIF1	49.15	protein_coding	3623
0.0080676	0.665	24.61	13.67	1.8	237206_at	ENSG00000141052	myocardin [Source:HGNC Symbol;Acc:HGNC:16067]	chr17	12665890	12768949	1	p12	MYOCD	41.77	protein_coding	8875
0.0012875	0.662	132.53	244.7	0.54	1558217_at	ENSG00000154760	schlafen family member 13 [Source:HGNC Symbol;Acc:HGNC:26481]	chr17	35435096	35448837	-1	q12	SLFN13	41.71	protein_coding	9329
0.0030171	0.662	16.44	24.52	0.67	1553423_a_at	ENSG00000154760	schlafen family member 13 [Source:HGNC Symbol;Acc:HGNC:26481]	chr17	35435096	35448837	-1	q12	SLFN13	41.71	protein_coding	9329
0.0086074	0.665	438.65	285.5	1.54	212549_at	ENSG00000173757	signal transducer and activator of transcription 5B [Source:HGNC Symbol;Acc:HGNC:11367]	chr17	42199177	42276707	-1	q21.2	STAT5B	43.63	protein_coding	6438
0.0056359	0.662	157.18	239.17	0.66	224785_at	ENSG00000185262	UBA like domain containing 2 [Source:HGNC Symbol;Acc:HGNC:28438]	chr17	76265348	76271298	1	q25.1	UBALD2	58.09	protein_coding	1650
0.0026099	0.662	1950.16	2791.67	0.7	1557820_at	ENSG00000141385	AFG3 like matrix AAA peptidase subunit 2 [Source:HGNC Symbol;Acc:HGNC:315]	chr18	12328944	12377227	-1	p11.21	AFG3L2	44.64	protein_coding	6708
0.0095192	0.665	138.3	207.95	0.67	212286_at	ENSG00000101745	ankyrin repeat domain 12 [Source:HGNC Symbol;Acc:HGNC:29135]	chr18	9136228	9285985	1	p11.22	ANKRD12	37.33	protein_coding	12248
0.008567	0.665	240.08	352.78	0.68	218827_s_at	ENSG00000101639	centrosomal protein 192 [Source:HGNC Symbol;Acc:HGNC:25515]	chr18	12991362	13125052	1	p11.21	CEP192	40.44	protein_coding	9901
0.0022686	0.662	16.84	31.15	0.54	204750_s_at	ENSG00000134755	desmocollin 2 [Source:HGNC Symbol;Acc:HGNC:3036]	chr18	31058840	31102522	-1	q12.1	DSC2	37.1	protein_coding	12501
0.002556	0.662	75.94	36.1	2.1	213924_at	ENSG00000141404	G protein subunit alpha L [Source:HGNC Symbol;Acc:HGNC:4388]	chr18	11689264	11885685	1	p11.21	GNAL	44.12	protein_coding	8165
0.0095628	0.665	135.39	217.27	0.62	215283_at	ENSG00000263753	long intergenic non-protein coding RNA 667 [Source:HGNC Symbol;Acc:HGNC:27906]	chr18	5237826	5290608	1	p11.31	LINC00667	38.71	lncRNA	10094
0.0073808	0.665	66.93	113.75	0.59	1555976_s_at	ENSG00000101608	myosin light chain 12A [Source:HGNC Symbol;Acc:HGNC:16701]	chr18	3247481	3256236	1	p11.31	MYL12A	38.81	protein_coding	3032
0.0044154	0.662	451.36	658.33	0.69	202844_s_at	ENSG00000017797	ralA binding protein 1 [Source:HGNC Symbol;Acc:HGNC:9841]	chr18	9475009	9538114	1	p11.22	RALBP1	41.37	protein_coding	8041
0.0075622	0.665	256.9	399.13	0.64	221190_s_at	ENSG00000141452	regulator of MON1-CCZ1 [Source:HGNC Symbol;Acc:HGNC:24326]	chr18	23503470	23531822	1	q11.2	RMC1	45.13	protein_coding	3105
0.009103	0.665	168.47	83.25	2.02	204581_at	ENSG00000012124	CD22 molecule [Source:HGNC Symbol;Acc:HGNC:1643]	chr19	35319261	35347361	1	q13.12	CD22	50.24	protein_coding	6165
0.0077935	0.665	1500.4	2554.48	0.59	201584_s_at	ENSG00000123136	DExD-box helicase 39A [Source:HGNC Symbol;Acc:HGNC:17821]	chr19	14408798	14419383	-1	p13.12	DDX39A	55.55	protein_coding	3861
0.0085512	0.665	726.08	1179.78	0.62	207525_s_at	ENSG00000123159	GIPC PDZ domain containing family member 1 [Source:HGNC Symbol;Acc:HGNC:1226]	chr19	14477760	14496149	-1	p13.12	GIPC1	53.7	protein_coding	4440
0.0098099	0.665	99.05	163.62	0.61	226308_at	ENSG00000131351	HAUS augmin like complex subunit 8 [Source:HGNC Symbol;Acc:HGNC:30532]	chr19	17049729	17075625	-1	p13.11	HAUS8	49.64	protein_coding	5533
0.0031643	0.662	59.16	31.77	1.86	226304_at	ENSG00000004776	heat shock protein family B (small) member 6 [Source:HGNC Symbol;Acc:HGNC:26511]	chr19	35754566	35758079	-1	q13.12	HSPB6	62.52	protein_coding	1724
0.0063027	0.662	420.44	255.2	1.65	226450_at	ENSG00000171105	insulin receptor [Source:HGNC Symbol;Acc:HGNC:6091]	chr19	7112255	7294414	-1	p13.2	INSR	47.51	protein_coding	10831
0.0089717	0.665	30.92	51.57	0.6	1566403_at	ENSG00000207166	small nucleolar RNA, H/ACA box 68 [Source:HGNC Symbol;Acc:HGNC:10225]	chr19	17862588	17862720	1	p13.11	SNORA68	49.62	snoRNA	133
0.001528	0.662	1261.16	637.43	1.98	201531_at	ENSG00000128016	ZFP36 ring finger protein [Source:HGNC Symbol;Acc:HGNC:12862]	chr19	39406847	39409412	1	q13.2	ZFP36	59.08	protein_coding	1976
0.0088553	0.665	92.68	165.62	0.56	229707_at	ENSG00000166704	zinc finger protein 606 [Source:HGNC Symbol;Acc:HGNC:25879]	chr19	57977076	58003349	-1	q13.43	ZNF606	45.01	protein_coding	7612
0.0062072	0.662	86.19	165.66	0.52	236429_at	ENSG00000167766	zinc finger protein 83 [Source:HGNC Symbol;Acc:HGNC:13158]	chr19	52594060	52690496	-1	q13.41	ZNF83	44.66	protein_coding	7695
0.0077603	0.665	197.55	67.63	2.92	202274_at	ENSG00000163017	actin gamma 2, smooth muscle [Source:HGNC Symbol;Acc:HGNC:145]	chr2	73892314	73919865	1	p13.1	ACTG2	45.18	protein_coding	3811
0.0069409	0.665	16.72	10.9	1.53	244463_at	ENSG00000114948	ADAM metallopeptidase domain 23 [Source:HGNC Symbol;Acc:HGNC:202]	chr2	206443532	206621127	1	q33.3	ADAM23	38.27	protein_coding	6425
0.0019855	0.662	168.23	282.48	0.6	205345_at	ENSG00000138376	BRCA1 associated RING domain 1 [Source:HGNC Symbol;Acc:HGNC:952]	chr2	214725646	214809683	-1	q35	BARD1	36.37	protein_coding	7572
0.0050542	0.662	209.09	93.14	2.24	226751_at	ENSG00000119865	cannabinoid receptor interacting protein 1 [Source:HGNC Symbol;Acc:HGNC:24546]	chr2	68284171	68320051	-1	p14	CNRIP1	40.04	protein_coding	3548
0.0013647	0.662	255.27	392.39	0.65	204211_x_at	ENSG00000055332	eukaryotic translation initiation factor 2 alpha kinase 2 [Source:HGNC Symbol;Acc:HGNC:9437]	chr2	37099210	37157522	-1	p22.2	EIF2AK2	41.3	protein_coding	11036
0.0077803	0.665	105.31	144.12	0.73	1554178_a_at	ENSG00000155744	family with sequence similarity 126 member B [Source:HGNC Symbol;Acc:HGNC:28593]	chr2	200973718	201071671	-1	q33.1	FAM126B	39.16	protein_coding	12810
0.0050634	0.662	627.45	917.36	0.68	219002_at	ENSG00000138399	FAST kinase domains 1 [Source:HGNC Symbol;Acc:HGNC:26150]	chr2	169528508	169573875	-1	q31.1	FASTKD1	38.04	protein_coding	5692
0.0082258	0.665	107.87	159.19	0.68	205976_at	ENSG00000118246	FAST kinase domains 2 [Source:HGNC Symbol;Acc:HGNC:29160]	chr2	206765357	206796189	1	q33.3	FASTKD2	38.19	protein_coding	9759
0.0020315	0.662	179.2	92.87	1.93	224002_s_at	ENSG00000079150	FKBP prolyl isomerase 7 [Source:HGNC Symbol;Acc:HGNC:3723]	chr2	178463664	178478600	-1	q31.2	FKBP7	37.58	protein_coding	3080
0.0075311	0.665	231.52	403.69	0.57	218726_at	ENSG00000123485	Holliday junction recognition protein [Source:HGNC Symbol;Acc:HGNC:25444]	chr2	233833416	233854566	-1	q37.1	HJURP	48.25	protein_coding	3821
0.0052231	0.662	32.71	51.4	0.64	239028_at	ENSG00000187123	LY6/PLAUR domain containing 6 [Source:HGNC Symbol;Acc:HGNC:28751]	chr2	149329985	149474138	1	q23.2	LYPD6	39.87	protein_coding	4973
0.0043964	0.662	115.3	220.71	0.52	212949_at	ENSG00000121152	non-SMC condensin I complex subunit H [Source:HGNC Symbol;Acc:HGNC:1112]	chr2	96335766	96377091	1	q11.2	NCAPH	45.16	protein_coding	6545
0.0026592	0.662	41.3	81.86	0.5	222270_at	ENSG00000275052	protein phosphatase 4 regulatory subunit 3B [Source:HGNC Symbol;Acc:HGNC:29267]	chr2	55547292	55618880	-1	p16.1	PPP4R3B	38.14	protein_coding	8217
0.0066314	0.665	611.54	859.85	0.71	233080_s_at	ENSG00000196504	pre-mRNA processing factor 40 homolog A [Source:HGNC Symbol;Acc:HGNC:16463]	chr2	152651593	152717997	-1	q23.3	PRPF40A	36.31	protein_coding	9530
0.0060154	0.662	51.06	83.2	0.61	239486_at	ENSG00000162924	REL proto-oncogene, NF-kB subunit [Source:HGNC Symbol;Acc:HGNC:9954]	chr2	60881521	60931612	1	p16.1	REL	37.61	protein_coding	13172
0.0014798	0.662	1164.26	445.5	2.61	212099_at	ENSG00000143878	ras homolog family member B [Source:HGNC Symbol;Acc:HGNC:668]	chr2	20447074	20449440	1	p24.1	RHOB	57.46	protein_coding	2367
0.0003572	0.662	233.45	352.72	0.66	214700_x_at	ENSG00000080345	replication timing regulatory factor 1 [Source:HGNC Symbol;Acc:HGNC:23207]	chr2	151409883	151508013	1	q23.3	RIF1	38.04	protein_coding	18166
0.009031	0.665	32.86	44.1	0.75	233781_s_at	ENSG00000080345	replication timing regulatory factor 1 [Source:HGNC Symbol;Acc:HGNC:23207]	chr2	151409883	151508013	1	q23.3	RIF1	38.04	protein_coding	18166
0.0029908	0.662	66.15	14.86	4.45	228504_at	ENSG00000136546	sodium voltage-gated channel alpha subunit 7 [Source:HGNC Symbol;Acc:HGNC:10594]	chr2	166403573	166611482	-1	q24.3	SCN7A	35.26	protein_coding	9733
0.0049627	0.662	178.6	285.25	0.63	1555274_a_at	ENSG00000138018	selenoprotein I [Source:HGNC Symbol;Acc:HGNC:29361]	chr2	26308547	26395891	1	p23.3	SELENOI	42.63	protein_coding	8552
0.0041872	0.662	131	229.17	0.57	235425_at	ENSG00000163535	shugoshin 2 [Source:HGNC Symbol;Acc:HGNC:30812]	chr2	200510008	200584096	1	q33.1	SGO2	37.74	protein_coding	6336
0.0071181	0.665	82.13	135.93	0.6	230494_at	ENSG00000144136	solute carrier family 20 member 1 [Source:HGNC Symbol;Acc:HGNC:10946]	chr2	112645939	112663825	1	q14.1	SLC20A1	42.28	protein_coding	5493
0.0059386	0.662	18.05	30.93	0.58	210985_s_at	ENSG00000067066	SP100 nuclear antigen [Source:HGNC Symbol;Acc:HGNC:11206]	chr2	230415942	230545606	1	q37.1	SP100	39.21	protein_coding	14134
0.0081418	0.665	56.67	93.04	0.61	210218_s_at	ENSG00000067066	SP100 nuclear antigen [Source:HGNC Symbol;Acc:HGNC:11206]	chr2	230415942	230545606	1	q37.1	SP100	39.21	protein_coding	14134
0.0041411	0.662	102.97	153.46	0.67	232529_at	ENSG00000172845	Sp3 transcription factor [Source:HGNC Symbol;Acc:HGNC:11208]	chr2	173880850	173965373	-1	q31.1	SP3	38.54	protein_coding	16892
0.00441	0.662	27.5	45.58	0.6	243376_at	ENSG00000136560	TRAF family member associated NFKB activator [Source:HGNC Symbol;Acc:HGNC:11562]	chr2	161136908	161236230	1	q24.2	TANK	35.76	protein_coding	5586
0.0051363	0.662	1083.57	1767.37	0.61	212072_s_at	ENSG00000101266	casein kinase 2 alpha 1 [Source:HGNC Symbol;Acc:HGNC:2457]	chr20	472498	543835	-1	p13	CSNK2A1	41.35	protein_coding	29523
0.0001027	0.662	272.65	472.32	0.58	220305_at	ENSG00000088888	mitochondrial antiviral signaling protein [Source:HGNC Symbol;Acc:HGNC:29233]	chr20	3846799	3876123	1	p13	MAVS	52.52	protein_coding	11771
0.000936	0.662	140.22	257.19	0.55	224320_s_at	ENSG00000125885	minichromosome maintenance 8 homologous recombination repair factor [Source:HGNC Symbol;Acc:HGNC:16147]	chr20	5950652	5998977	1	p12.3	MCM8	39.4	protein_coding	7691
0.0043998	0.662	613.86	892.13	0.69	225890_at	ENSG00000125871	mitochondrial genome maintenance exonuclease 1 [Source:HGNC Symbol;Acc:HGNC:16205]	chr20	17969018	17991122	1	p11.23	MGME1	42.67	protein_coding	2231
0.0094201	0.665	1115.13	1626.91	0.69	225196_s_at	ENSG00000125901	mitochondrial ribosomal protein S26 [Source:HGNC Symbol;Acc:HGNC:14045]	chr20	3046052	3048250	1	p13	MRPS26	60.25	protein_coding	1016
0.0065204	0.665	39.84	76.18	0.52	240549_at	ENSG00000225377	NRSN2 antisense RNA 1 [Source:HGNC Symbol;Acc:HGNC:51222]	chr20	316860	348490	-1	p13	NRSN2-AS1	51.6	lncRNA	6273
0.002908	0.662	112.52	160.87	0.7	236951_at	ENSG00000088833	NSFL1 cofactor [Source:HGNC Symbol;Acc:HGNC:15912]	chr20	1442162	1473842	-1	p13	NSFL1C	45.86	protein_coding	5757
0.0021692	0.662	411.55	660.45	0.62	201052_s_at	ENSG00000125818	proteasome inhibitor subunit 1 [Source:HGNC Symbol;Acc:HGNC:9571]	chr20	1113240	1189415	1	p13	PSMF1	45.44	protein_coding	10361
0.002283	0.662	785.34	1414.46	0.56	221827_at	ENSG00000125826	RANBP2-type and C3HC4-type zinc finger containing 1 [Source:HGNC Symbol;Acc:HGNC:15864]	chr20	407498	432139	1	p13	RBCK1	51.27	protein_coding	5197
0.0032855	0.662	347.29	580.69	0.6	207713_s_at	ENSG00000125826	RANBP2-type and C3HC4-type zinc finger containing 1 [Source:HGNC Symbol;Acc:HGNC:15864]	chr20	407498	432139	1	p13	RBCK1	51.27	protein_coding	5197
0.0097515	0.665	1677.25	2287.73	0.73	208821_at	ENSG00000125835	small nuclear ribonucleoprotein polypeptides B and B1 [Source:HGNC Symbol;Acc:HGNC:11153]	chr20	2461634	2470853	-1	p13	SNRPB	46.19	protein_coding	1278
0.0098937	0.665	96.09	158.71	0.61	223666_at	ENSG00000089006	sorting nexin 5 [Source:HGNC Symbol;Acc:HGNC:14969]	chr20	17941597	17968980	-1	p11.23	SNX5	42.13	protein_coding	7953
0.0040863	0.662	283.15	423.72	0.67	225648_at	ENSG00000125834	serine/threonine kinase 35 [Source:HGNC Symbol;Acc:HGNC:16254]	chr20	2101827	2177038	1	p13	STK35	48.09	protein_coding	6839
0.0052636	0.662	1869.03	2828.48	0.66	225649_s_at	ENSG00000125834	serine/threonine kinase 35 [Source:HGNC Symbol;Acc:HGNC:16254]	chr20	2101827	2177038	1	p13	STK35	48.09	protein_coding	6839
0.0075738	0.665	309.87	470.28	0.66	225091_at	ENSG00000247315	zinc finger CCHC-type containing 3 [Source:HGNC Symbol;Acc:HGNC:16230]	chr20	297570	300321	1	p13	ZCCHC3	55.56	protein_coding	2752
0.0046024	0.662	28.89	47.19	0.61	1553789_a_at	ENSG00000160298	chromosome 21 open reading frame 58 [Source:HGNC Symbol;Acc:HGNC:1300]	chr21	46300181	46323875	-1	q22.3	C21orf58	52.19	protein_coding	5315
0.0025668	0.662	1111.79	726.57	1.53	202749_at	ENSG00000182093	guided entry of tail-anchored proteins factor 1 [Source:HGNC Symbol;Acc:HGNC:12790]	chr21	39377698	39428528	1	q22.2	GET1	44.4	protein_coding	8639
0.0088874	0.665	172.3	119.04	1.45	228239_at	ENSG00000205670	small integral membrane protein 11A [Source:HGNC Symbol;Acc:HGNC:1293]	chr21	34375480	34416961	1	q22.11	SMIM11A	47.3	protein_coding	7896
0.0046876	0.662	296.47	206.62	1.43	227421_at	ENSG00000182362	ybeY metalloendoribonuclease [Source:HGNC Symbol;Acc:HGNC:1299]	chr21	46286342	46297751	1	q22.3	YBEY	53.09	protein_coding	1802
0.006435	0.665	271.8	189.84	1.43	205037_at	ENSG00000100360	intraflagellar transport 27 [Source:HGNC Symbol;Acc:HGNC:18626]	chr22	36758202	36776256	-1	q12.3	IFT27	51.18	protein_coding	8009
0.0060378	0.662	497.55	348.68	1.43	212715_s_at	ENSG00000243156	microtubule associated monooxygenase, calponin and LIM domain containing 3 [Source:HGNC Symbol;Acc:HGNC:24694]	chr22	17787649	18024561	-1	q11.21	MICAL3	49.78	protein_coding	22444
0.0072323	0.665	29	21.64	1.34	205864_at	ENSG00000099960	solute carrier family 7 member 4 [Source:HGNC Symbol;Acc:HGNC:11062]	chr22	21028718	21032840	-1	q11.21	SLC7A4	62.43	protein_coding	2450
0.0026258	0.662	228.45	120.5	1.9	207390_s_at	ENSG00000183963	smoothelin [Source:HGNC Symbol;Acc:HGNC:11126]	chr22	31064105	31104757	1	q12.2	SMTN	54.79	protein_coding	10242
0.0030687	0.662	354.19	194.24	1.82	209427_at	ENSG00000183963	smoothelin [Source:HGNC Symbol;Acc:HGNC:11126]	chr22	31064105	31104757	1	q12.2	SMTN	54.79	protein_coding	10242
0.0064852	0.665	146.98	58.6	2.51	201149_s_at	ENSG00000100234	TIMP metallopeptidase inhibitor 3 [Source:HGNC Symbol;Acc:HGNC:11822]	chr22	32801705	32863041	1	q12.3	TIMP3	47.17	protein_coding	4597
0.0067716	0.665	1031.44	319.7	3.23	201150_s_at	ENSG00000100234	TIMP metallopeptidase inhibitor 3 [Source:HGNC Symbol;Acc:HGNC:11822]	chr22	32801705	32863041	1	q12.3	TIMP3	47.17	protein_coding	4597
0.0094418	0.665	454.26	101.74	4.46	223395_at	ENSG00000154175	ABI family member 3 binding protein [Source:HGNC Symbol;Acc:HGNC:17265]	chr3	100749156	100993515	-1	q12.2	ABI3BP	37.02	protein_coding	10978
0.0023788	0.662	126.22	42.59	2.96	242447_at	ENSG00000187068	chromosome 3 open reading frame 70 [Source:HGNC Symbol;Acc:HGNC:33731]	chr3	185076838	185153060	-1	q27.2	C3orf70	39.96	protein_coding	7159
0.0050941	0.662	141.91	48.63	2.92	229580_at	ENSG00000158258	calsyntenin 2 [Source:HGNC Symbol;Acc:HGNC:17448]	chr3	139935185	140577397	1	q23	CLSTN2	42.71	protein_coding	14596
0.0053582	0.662	1442.16	2308.69	0.62	225415_at	ENSG00000163840	deltex E3 ubiquitin ligase 3L [Source:HGNC Symbol;Acc:HGNC:30323]	chr3	122564338	122575203	1	q21.1	DTX3L	44.22	protein_coding	5768
0.0062162	0.662	106.08	59.8	1.77	229844_at	ENSG00000114861	forkhead box P1 [Source:HGNC Symbol;Acc:HGNC:3823]	chr3	70954708	71583989	-1	p13	FOXP1	41.11	protein_coding	34819
0.0010166	0.662	220.37	110.55	1.99	203710_at	ENSG00000150995	inositol 1,4,5-trisphosphate receptor type 1 [Source:HGNC Symbol;Acc:HGNC:6180]	chr3	4493345	4847506	1	p26.1	ITPR1	42.9	protein_coding	32120
0.0074113	0.665	73.97	45.48	1.63	216944_s_at	ENSG00000150995	inositol 1,4,5-trisphosphate receptor type 1 [Source:HGNC Symbol;Acc:HGNC:6180]	chr3	4493345	4847506	1	p26.1	ITPR1	42.9	protein_coding	32120
0.0057598	0.662	41.16	64.96	0.63	206038_s_at	ENSG00000177463	nuclear receptor subfamily 2 group C member 2 [Source:HGNC Symbol;Acc:HGNC:7972]	chr3	14947584	15053600	1	p25.1	NR2C2	42.09	protein_coding	11821
0.0020666	0.662	259.76	111.57	2.33	218717_s_at	ENSG00000090530	prolyl 3-hydroxylase 2 [Source:HGNC Symbol;Acc:HGNC:19317]	chr3	189956728	190122437	-1	q28	P3H2	38.18	protein_coding	5573
0.0036505	0.662	158.35	291.04	0.54	227807_at	ENSG00000138496	poly(ADP-ribose) polymerase family member 9 [Source:HGNC Symbol;Acc:HGNC:24118]	chr3	122527924	122564577	-1	q21.1	PARP9	42.46	protein_coding	8938
0.0057245	0.662	185.04	92.85	1.99	226636_at	ENSG00000075651	phospholipase D1 [Source:HGNC Symbol;Acc:HGNC:9067]	chr3	171600404	171810950	-1	q26.31	PLD1	38.86	protein_coding	12860
0.0065104	0.665	58.02	112.26	0.52	207746_at	ENSG00000051341	DNA polymerase theta [Source:HGNC Symbol;Acc:HGNC:9186]	chr3	121431431	121545988	-1	q13.33	POLQ	39.03	protein_coding	9185
0.0099398	0.665	190.94	333.33	0.57	219510_at	ENSG00000051341	DNA polymerase theta [Source:HGNC Symbol;Acc:HGNC:9186]	chr3	121431431	121545988	-1	q13.33	POLQ	39.03	protein_coding	9185
0.0088378	0.665	172.39	242.06	0.71	219178_at	ENSG00000151576	queuine tRNA-ribosyltransferase accessory subunit 2 [Source:HGNC Symbol;Acc:HGNC:25771]	chr3	114005833	114088422	1	q13.31	QTRT2	38.31	protein_coding	8054
0.0079084	0.665	1936.91	2616.1	0.74	212058_at	ENSG00000163714	U2 snRNP associated SURP domain containing [Source:HGNC Symbol;Acc:HGNC:30855]	chr3	142964497	143060725	1	q23	U2SURP	38.44	protein_coding	11297
0.0036656	0.662	40.47	76.93	0.53	1555785_a_at	ENSG00000114127	5'-3' exoribonuclease 1 [Source:HGNC Symbol;Acc:HGNC:30654]	chr3	142306607	142448062	-1	q23	XRN1	36.98	protein_coding	11982
0.0040987	0.662	490.72	354.33	1.38	226399_at	ENSG00000164031	DnaJ heat shock protein family (Hsp40) member B14 [Source:HGNC Symbol;Acc:HGNC:25881]	chr4	99896248	99946618	-1	q23	DNAJB14	34.7	protein_coding	12970
0.0012487	0.662	27.98	11.01	2.54	204422_s_at	ENSG00000138685	fibroblast growth factor 2 [Source:HGNC Symbol;Acc:HGNC:3676]	chr4	122826708	122898236	1	q28.1	FGF2	38.74	protein_coding	6775
0.0052075	0.662	34.12	20.65	1.65	204421_s_at	ENSG00000138685	fibroblast growth factor 2 [Source:HGNC Symbol;Acc:HGNC:3676]	chr4	122826708	122898236	1	q28.1	FGF2	38.74	protein_coding	6775
0.005297	0.662	79.69	57	1.4	214987_at	ENSG00000109458	GRB2 associated binding protein 1 [Source:HGNC Symbol;Acc:HGNC:4066]	chr4	143336762	143474568	1	q31.21	GAB1	38.61	protein_coding	10119
0.0020573	0.662	5404.13	2500.58	2.16	201162_at	ENSG00000163453	insulin like growth factor binding protein 7 [Source:HGNC Symbol;Acc:HGNC:5476]	chr4	57030773	57110385	-1	q12	IGFBP7	42.44	protein_coding	1930
0.0097745	0.665	92.85	42.35	2.19	205051_s_at	ENSG00000157404	KIT proto-oncogene, receptor tyrosine kinase [Source:HGNC Symbol;Acc:HGNC:6342]	chr4	54657918	54740715	1	q12	KIT	40.87	protein_coding	5563
0.0012108	0.662	270.06	119.12	2.27	206481_s_at	ENSG00000169744	LIM domain binding 2 [Source:HGNC Symbol;Acc:HGNC:6533]	chr4	16501541	16898678	-1	p15.32	LDB2	40.2	protein_coding	5455
0.0012768	0.662	298.9	194.02	1.54	203778_at	ENSG00000109323	mannosidase beta [Source:HGNC Symbol;Acc:HGNC:6831]	chr4	102630770	102760994	-1	q24	MANBA	39.25	protein_coding	11743
0.0094022	0.665	278.91	203.36	1.37	228282_at	ENSG00000164073	major facilitator superfamily domain containing 8 [Source:HGNC Symbol;Acc:HGNC:28486]	chr4	127917799	127966034	-1	q28.2	MFSD8	39.23	protein_coding	8849
0.0065448	0.665	97.4	39.39	2.47	219747_at	ENSG00000173376	neuron derived neurotrophic factor [Source:HGNC Symbol;Acc:HGNC:26256]	chr4	121035613	121073021	-1	q27	NDNF	38.85	protein_coding	3573
0.003743	0.662	235.95	103.6	2.28	205259_at	ENSG00000151623	nuclear receptor subfamily 3 group C member 2 [Source:HGNC Symbol;Acc:HGNC:7979]	chr4	148078762	148444698	-1	q31.23	NR3C2	38.42	protein_coding	6607
0.0018445	0.662	310.27	135.48	2.29	225975_at	ENSG00000189184	protocadherin 18 [Source:HGNC Symbol;Acc:HGNC:14268]	chr4	137518918	137532494	-1	q28.3	PCDH18	36.59	protein_coding	6686
0.0021237	0.662	84.07	38.98	2.16	227088_at	ENSG00000138735	phosphodiesterase 5A [Source:HGNC Symbol;Acc:HGNC:8784]	chr4	119494397	119628804	-1	q26	PDE5A	36.4	protein_coding	9586
0.0030319	0.662	198.92	90.84	2.19	219142_at	ENSG00000128045	RAS like family 11 member B [Source:HGNC Symbol;Acc:HGNC:23804]	chr4	52862317	52866835	1	q12	RASL11B	47.58	protein_coding	2445
0.0084947	0.665	79.42	40.87	1.94	229491_at	ENSG00000164038	solute carrier family 9 member B2 [Source:HGNC Symbol;Acc:HGNC:25143]	chr4	103019868	103085829	-1	q24	SLC9B2	37.26	protein_coding	8611
0.0096142	0.665	747.85	450.15	1.66	225014_at	ENSG00000250317	small integral membrane protein 20 [Source:HGNC Symbol;Acc:HGNC:37260]	chr4	25861830	25929874	1	p15.2	SMIM20	45.19	protein_coding	1612
0.0084756	0.665	111.4	64.12	1.74	205236_x_at	ENSG00000109610	superoxide dismutase 3 [Source:HGNC Symbol;Acc:HGNC:11181]	chr4	24789912	24800842	1	p15.2	SOD3	49.34	protein_coding	2018
0.0005984	0.662	362.59	188.9	1.92	218638_s_at	ENSG00000159674	spondin 2 [Source:HGNC Symbol;Acc:HGNC:11253]	chr4	1166932	1208962	-1	p16.3	SPON2	53.74	protein_coding	5985
0.0001	0.662	272.74	75.98	3.59	225895_at	ENSG00000172403	synaptopodin 2 [Source:HGNC Symbol;Acc:HGNC:17732]	chr4	118850688	119061247	1	q26	SYNPO2	38.36	protein_coding	19530
0.0003869	0.662	98.35	36.34	2.71	225720_at	ENSG00000172403	synaptopodin 2 [Source:HGNC Symbol;Acc:HGNC:17732]	chr4	118850688	119061247	1	q26	SYNPO2	38.36	protein_coding	19530
0.0006815	0.662	226.12	48.99	4.62	227662_at	ENSG00000172403	synaptopodin 2 [Source:HGNC Symbol;Acc:HGNC:17732]	chr4	118850688	119061247	1	q26	SYNPO2	38.36	protein_coding	19530
0.000845	0.662	209.16	89.7	2.33	225721_at	ENSG00000172403	synaptopodin 2 [Source:HGNC Symbol;Acc:HGNC:17732]	chr4	118850688	119061247	1	q26	SYNPO2	38.36	protein_coding	19530
0.0009577	0.662	40.21	19.23	2.09	225894_at	ENSG00000172403	synaptopodin 2 [Source:HGNC Symbol;Acc:HGNC:17732]	chr4	118850688	119061247	1	q26	SYNPO2	38.36	protein_coding	19530
0.0073789	0.665	34.73	18.85	1.84	238081_at	ENSG00000180769	WDFY3 antisense RNA 2 [Source:HGNC Symbol;Acc:HGNC:21603]	chr4	84965534	85011277	1	q21.23	WDFY3-AS2	38.3	lncRNA	9357
0.0015727	0.662	559.22	339.06	1.65	200982_s_at	ENSG00000197043	annexin A6 [Source:HGNC Symbol;Acc:HGNC:544]	chr5	151100706	151157785	-1	q33.1	ANXA6	48.97	protein_coding	5478
0.0099064	0.665	6528.36	4611.54	1.42	208517_x_at	ENSG00000145741	basic transcription factor 3 [Source:HGNC Symbol;Acc:HGNC:1125]	chr5	73498408	73505635	1	q13.2	BTF3	38.63	protein_coding	5552
0.0062298	0.662	2344.05	1041.81	2.25	201041_s_at	ENSG00000120129	dual specificity phosphatase 1 [Source:HGNC Symbol;Acc:HGNC:3064]	chr5	172768096	172771195	-1	q35.1	DUSP1	53.06	protein_coding	2013
0.001173	0.662	501.1	268.93	1.86	226977_at	ENSG00000182700	IgA inducing protein [Source:HGNC Symbol;Acc:HGNC:33847]	chr5	140125937	140129392	1	q31.3	IGIP	35.5	protein_coding	3456
0.0053736	0.662	2348.63	1537.62	1.53	212195_at	ENSG00000134352	interleukin 6 signal transducer [Source:HGNC Symbol;Acc:HGNC:6021]	chr5	55935095	55995022	-1	q11.2	IL6ST	37.44	protein_coding	10117
0.002476	0.662	25.54	17.18	1.49	1560359_at	ENSG00000213949	integrin subunit alpha 1 [Source:HGNC Symbol;Acc:HGNC:6134]	chr5	52787916	52959209	1	q11.2	ITGA1	36.8	protein_coding	18545
0.0081349	0.665	2864.65	3814.37	0.75	207168_s_at	ENSG00000113648	macroH2A.1 histone [Source:HGNC Symbol;Acc:HGNC:4740]	chr5	135333900	135399914	-1	q31.1	MACROH2A1	47.07	protein_coding	17730
0.0097397	0.665	510.58	335.89	1.52	228961_at	ENSG00000155545	MIER family member 3 [Source:HGNC Symbol;Acc:HGNC:26678]	chr5	56919602	56971675	-1	q11.2	MIER3	38.91	protein_coding	5763
0.0073742	0.665	578.42	411.23	1.41	212145_at	ENSG00000113048	mitochondrial ribosomal protein S27 [Source:HGNC Symbol;Acc:HGNC:14512]	chr5	72219403	72320646	-1	q13.2	MRPS27	38.95	protein_coding	6517
0.0039151	0.662	183.87	124.62	1.48	209506_s_at	ENSG00000175745	nuclear receptor subfamily 2 group F member 1	chr5	93583222	93594611	1		NR2F1		protein_coding
0.0055954	0.662	3200.13	1988.84	1.61	201922_at	ENSG00000164346	NSA2 ribosome biogenesis factor [Source:HGNC Symbol;Acc:HGNC:30728]	chr5	74766991	74780113	1	q13.3	NSA2	37.93	protein_coding	4962
0.0057107	0.662	376.32	219.56	1.71	210946_at	ENSG00000067113	phospholipid phosphatase 1 [Source:HGNC Symbol;Acc:HGNC:9228]	chr5	55424854	55534969	-1	q11.2	PLPP1	39.6	protein_coding	1935
0.0066416	0.665	291.95	161.66	1.81	209147_s_at	ENSG00000067113	phospholipid phosphatase 1 [Source:HGNC Symbol;Acc:HGNC:9228]	chr5	55424854	55534969	-1	q11.2	PLPP1	39.6	protein_coding	1935
0.0012135	0.662	79.35	114.98	0.69	1553639_a_at	ENSG00000155846	PPARG coactivator 1 beta [Source:HGNC Symbol;Acc:HGNC:30022]	chr5	149730298	149855022	1	q32	PPARGC1B	49	protein_coding	12889
0.0010797	0.662	341.68	95.29	3.59	202976_s_at	ENSG00000164292	Rho related BTB domain containing 3 [Source:HGNC Symbol;Acc:HGNC:18757]	chr5	95713522	95824383	1	q15	RHOBTB3	40.56	protein_coding	8827
0.0021584	0.662	708.25	215.14	3.29	225202_at	ENSG00000164292	Rho related BTB domain containing 3 [Source:HGNC Symbol;Acc:HGNC:18757]	chr5	95713522	95824383	1	q15	RHOBTB3	40.56	protein_coding	8827
0.0044947	0.662	137.09	50.29	2.73	202975_s_at	ENSG00000164292	Rho related BTB domain containing 3 [Source:HGNC Symbol;Acc:HGNC:18757]	chr5	95713522	95824383	1	q15	RHOBTB3	40.56	protein_coding	8827
0.0094953	0.665	15.87	9.53	1.66	236644_at	ENSG00000164197	ring finger protein 180 [Source:HGNC Symbol;Acc:HGNC:27752]	chr5	64165843	64372869	1	q12.3	RNF180	36.57	protein_coding	5435
0.0052686	0.662	672.67	487.6	1.38	212635_at	ENSG00000083312	transportin 1 [Source:HGNC Symbol;Acc:HGNC:6401]	chr5	72816312	72916733	1	q13.2	TNPO1	37.25	protein_coding	13099
0.0053505	0.662	129.35	43.7	2.96	227529_s_at	ENSG00000131016	A-kinase anchoring protein 12 [Source:HGNC Symbol;Acc:HGNC:370]	chr6	151239967	151358559	1	q25.1	AKAP12	43.87	protein_coding	8775
0.0023068	0.662	40.16	98.17	0.41	214472_at	ENSG00000197409	H3 clustered histone 4 [Source:HGNC Symbol;Acc:HGNC:4767]	chr6	26196784	26197286	-1	p22.2	H3C4	58.45	protein_coding	503
0.0076486	0.665	139.78	68.79	2.03	213519_s_at	ENSG00000196569	laminin subunit alpha 2 [Source:HGNC Symbol;Acc:HGNC:6482]	chr6	128883138	129516566	1	q22.33	LAMA2	36.02	protein_coding	10358
0.0076521	0.665	105.33	58.59	1.8	205116_at	ENSG00000196569	laminin subunit alpha 2 [Source:HGNC Symbol;Acc:HGNC:6482]	chr6	128883138	129516566	1	q22.33	LAMA2	36.02	protein_coding	10358
0.0036318	0.662	160.55	62.38	2.57	230109_at	ENSG00000171408	phosphodiesterase 7B [Source:HGNC Symbol;Acc:HGNC:8792]	chr6	135851701	136195574	1	q23.3	PDE7B	38.31	protein_coding	5941
0.0041307	0.662	17.32	7.41	2.34	204940_at	ENSG00000198523	phospholamban [Source:HGNC Symbol;Acc:HGNC:9080]	chr6	118548296	118561716	1	q22.31	PLN	33.9	protein_coding	2989
0.0045683	0.662	67.07	21.35	3.14	204939_s_at	ENSG00000198523	phospholamban [Source:HGNC Symbol;Acc:HGNC:9080]	chr6	118548296	118561716	1	q22.31	PLN	33.9	protein_coding	2989
0.0006325	0.662	1462.05	944.59	1.55	213545_x_at	ENSG00000112335	sorting nexin 3 [Source:HGNC Symbol;Acc:HGNC:11174]	chr6	108211222	108261246	-1	q21	SNX3	41.15	protein_coding	1828
0.0017976	0.662	2489.36	1651.37	1.51	200067_x_at	ENSG00000112335	sorting nexin 3 [Source:HGNC Symbol;Acc:HGNC:11174]	chr6	108211222	108261246	-1	q21	SNX3	41.15	protein_coding	1828
0.004441	0.662	52.62	20.99	2.51	213411_at	ENSG00000008277	ADAM metallopeptidase domain 22 [Source:HGNC Symbol;Acc:HGNC:201]	chr7	87934143	88202889	1	q21.12	ADAM22	37.29	protein_coding	13668
0.0006471	0.662	53.91	29.24	1.84	221885_at	ENSG00000146966	DENN domain containing 2A [Source:HGNC Symbol;Acc:HGNC:22212]	chr7	140518420	140673993	-1	q34	DENND2A	47.56	protein_coding	5175
0.000905	0.662	108.82	56.13	1.94	53991_at	ENSG00000146966	DENN domain containing 2A [Source:HGNC Symbol;Acc:HGNC:22212]	chr7	140518420	140673993	-1	q34	DENND2A	47.56	protein_coding	5175
0.0057727	0.662	33.98	15.19	2.24	235201_at	ENSG00000128573	forkhead box P2 [Source:HGNC Symbol;Acc:HGNC:13875]	chr7	114086327	114693772	1	q31.1	FOXP2	34.83	protein_coding	16334
0.0095874	0.665	24.63	9.58	2.57	243278_at	ENSG00000128573	forkhead box P2 [Source:HGNC Symbol;Acc:HGNC:13875]	chr7	114086327	114693772	1	q31.1	FOXP2	34.83	protein_coding	16334
0.0089589	0.665	158.07	72.59	2.18	205381_at	ENSG00000128606	leucine rich repeat containing 17 [Source:HGNC Symbol;Acc:HGNC:16895]	chr7	102913000	102945111	1	q22.1	LRRC17	39.08	protein_coding	2827
0.00175	0.662	758.04	262.5	2.89	225207_at	ENSG00000004799	pyruvate dehydrogenase kinase 4 [Source:HGNC Symbol;Acc:HGNC:8812]	chr7	95583499	95596516	-1	q21.3	PDK4	36.08	protein_coding	4544
0.0017922	0.662	66.73	21.51	3.1	1562321_at	ENSG00000004799	pyruvate dehydrogenase kinase 4 [Source:HGNC Symbol;Acc:HGNC:8812]	chr7	95583499	95596516	-1	q21.3	PDK4	36.08	protein_coding	4544
0.0058301	0.662	131.41	85.2	1.54	212559_at	ENSG00000188191	protein kinase cAMP-dependent type I regulatory subunit beta [Source:HGNC Symbol;Acc:HGNC:9390]	chr7	549197	727650	-1	p22.3	PRKAR1B	54.13	protein_coding	4491
0.0051023	0.662	102.05	61.75	1.65	238418_at	ENSG00000205060	solute carrier family 35 member B4 [Source:HGNC Symbol;Acc:HGNC:20584]	chr7	134289332	134316930	-1	q33	SLC35B4	40.4	protein_coding	6988
0.0062028	0.662	5603.83	3775.51	1.48	201812_s_at	ENSG00000196683	translocase of outer mitochondrial membrane 7 [Source:HGNC Symbol;Acc:HGNC:21648]	chr7	22812628	22822852	-1	p15.3	TOMM7	41.61	protein_coding	1751
0.0068258	0.665	105.6	182.72	0.58	223302_s_at	ENSG00000197343	zinc finger protein 655 [Source:HGNC Symbol;Acc:HGNC:30899]	chr7	99558406	99576453	1	q22.1	ZNF655	42.73	protein_coding	8401
0.0032852	0.662	65.35	97.88	0.67	1558762_a_at	ENSG00000198556	zinc finger protein 789 [Source:HGNC Symbol;Acc:HGNC:27801]	chr7	99472890	99503650	1	q22.1	ZNF789	47.74	protein_coding	6645
0.0098258	0.665	84.59	143.48	0.59	226661_at	ENSG00000184661	cell division cycle associated 2 [Source:HGNC Symbol;Acc:HGNC:14623]	chr8	25459199	25507911	1	p21.2	CDCA2	39.63	protein_coding	3697
0.001006	0.662	185.4	107.16	1.73	208454_s_at	ENSG00000104324	carboxypeptidase Q [Source:HGNC Symbol;Acc:HGNC:16910]	chr8	96645242	97149654	1	q22.1	CPQ	38.13	protein_coding	3442
0.0095543	0.665	95.12	43.34	2.19	241762_at	ENSG00000156804	F-box protein 32 [Source:HGNC Symbol;Acc:HGNC:16731]	chr8	123497889	123541206	-1	q24.13	FBXO32	44.08	protein_coding	7395
0.0019017	0.662	189.22	64.55	2.93	204472_at	ENSG00000164949	GTP binding protein overexpressed in skeletal muscle [Source:HGNC Symbol;Acc:HGNC:4234]	chr8	94249253	94262350	-1	q22.1	GEM	44.2	protein_coding	2648
0.0005745	0.662	173.99	60.41	2.88	212154_at	ENSG00000169439	syndecan 2 [Source:HGNC Symbol;Acc:HGNC:10659]	chr8	96493813	96611790	1	q22.1	SDC2	41.32	protein_coding	4084
0.0018955	0.662	119.97	55.39	2.17	212157_at	ENSG00000169439	syndecan 2 [Source:HGNC Symbol;Acc:HGNC:10659]	chr8	96493813	96611790	1	q22.1	SDC2	41.32	protein_coding	4084
0.002722	0.662	561.78	178.69	3.14	212158_at	ENSG00000169439	syndecan 2 [Source:HGNC Symbol;Acc:HGNC:10659]	chr8	96493813	96611790	1	q22.1	SDC2	41.32	protein_coding	4084
0.0042475	0.662	20.47	13.19	1.55	202035_s_at	ENSG00000104332	secreted frizzled related protein 1 [Source:HGNC Symbol;Acc:HGNC:10776]	chr8	41261962	41309473	-1	p11.21	SFRP1	48.61	protein_coding	4733
0.0049702	0.662	31.07	20.26	1.53	202036_s_at	ENSG00000104332	secreted frizzled related protein 1 [Source:HGNC Symbol;Acc:HGNC:10776]	chr8	41261962	41309473	-1	p11.21	SFRP1	48.61	protein_coding	4733
0.0085319	0.665	263.87	74.13	3.56	202037_s_at	ENSG00000104332	secreted frizzled related protein 1 [Source:HGNC Symbol;Acc:HGNC:10776]	chr8	41261962	41309473	-1	p11.21	SFRP1	48.61	protein_coding	4733
0.00471	0.662	302.65	87.32	3.47	219778_at	ENSG00000169946	zinc finger protein, FOG family member 2 [Source:HGNC Symbol;Acc:HGNC:16700]	chr8	104590733	105804539	1	q22.3	ZFPM2	37.04	protein_coding	8036
0.0033825	0.662	73.41	100.6	0.73	235903_at	ENSG00000165138	ankyrin repeat and sterile alpha motif domain containing 6 [Source:HGNC Symbol;Acc:HGNC:26724]	chr9	98731329	98796965	-1	q22.33	ANKS6	46.95	protein_coding	8862
0.0039653	0.662	175.61	54.85	3.2	206101_at	ENSG00000106823	extracellular matrix protein 2 [Source:HGNC Symbol;Acc:HGNC:3154]	chr9	92493554	92536655	-1	q22.31	ECM2	38.89	protein_coding	4916
0.005055	0.662	66.07	38.26	1.73	215436_at	ENSG00000119471	hydroxysteroid dehydrogenase like 2 [Source:HGNC Symbol;Acc:HGNC:18572]	chr9	112380080	112472405	1	q32	HSDL2	40.76	protein_coding	3307
0.0097088	0.665	41.14	17.86	2.3	221796_at	ENSG00000148053	neurotrophic receptor tyrosine kinase 2 [Source:HGNC Symbol;Acc:HGNC:8032]	chr9	84668551	85027054	1	q21.33	NTRK2	40.93	protein_coding	20347
0.0034098	0.662	134.15	50.64	2.65	206167_s_at	ENSG00000047648	Rho GTPase activating protein 6 [Source:HGNC Symbol;Acc:HGNC:676]	chrX	11117651	11665920	-1	p22.2	ARHGAP6	39.23	protein_coding	8893
0.0034131	0.662	126.13	68.98	1.83	227444_at	ENSG00000196440	armadillo repeat containing X-linked 4 [Source:HGNC Symbol;Acc:HGNC:28615]	chrX	101418287	101533459	1	q22.1	ARMCX4	41.06	protein_coding	13351
0.004513	0.662	595.22	200.78	2.96	204984_at	ENSG00000076716	glypican 4 [Source:HGNC Symbol;Acc:HGNC:4452]	chrX	133300103	133415489	-1	q26.2	GPC4	41.25	protein_coding	4959
0.0046801	0.662	204.06	93.44	2.18	204793_at	ENSG00000198932	G protein-coupled receptor associated sorting protein 1 [Source:HGNC Symbol;Acc:HGNC:24834]	chrX	102651092	102659083	1	q22.1	GPRASP1	49.32	protein_coding	6789
0.0071477	0.665	601.94	321.18	1.87	226671_at	ENSG00000005893	lysosomal associated membrane protein 2 [Source:HGNC Symbol;Acc:HGNC:6501]	chrX	120426148	120469365	-1	q24	LAMP2	38.61	protein_coding	9404
0.002047	0.662	422.05	138.04	3.06	204041_at	ENSG00000069535	monoamine oxidase B [Source:HGNC Symbol;Acc:HGNC:6834]	chrX	43766610	43882450	-1	p11.3	MAOB	39.31	protein_coding	2895
0.005981	0.662	1139.34	720.79	1.58	225125_at	ENSG00000169446	membrane magnesium transporter 1 [Source:HGNC Symbol;Acc:HGNC:28100]	chrX	135960588	135974029	-1	q26.3	MMGT1	38.96	protein_coding	5186
0.0014996	0.662	520.28	341.93	1.52	218853_s_at	ENSG00000101928	motile sperm domain containing 1 [Source:HGNC Symbol;Acc:HGNC:25235]	chrX	134887632	134915257	-1	q26.3	MOSPD1	40.82	protein_coding	2659
0.0020824	0.662	332.51	76.36	4.35	229160_at	ENSG00000157502	PWWP domain containing 3B [Source:HGNC Symbol;Acc:HGNC:26583]	chrX	106168305	106208956	1	q22.3	PWWP3B	38.7	protein_coding	4343
0.0053835	0.662	85.43	48.25	1.77	222918_at	ENSG00000123570	RAB9B, member RAS oncogene family [Source:HGNC Symbol;Acc:HGNC:14090]	chrX	103822327	103832257	-1	q22.2	RAB9B	39.76	protein_coding	3772
0.0063243	0.662	475.87	261.7	1.82	204045_at	ENSG00000172465	transcription elongation factor A like 1 [Source:HGNC Symbol;Acc:HGNC:11616]	chrX	103628704	103630953	1	q22.2	TCEAL1	50.67	protein_coding	1601
0.0096194	0.665	2877.8	1958.73	1.47	202371_at	ENSG00000133142	transcription elongation factor A like 4 [Source:HGNC Symbol;Acc:HGNC:26121]	chrX	103576231	103587729	1	q22.2	TCEAL4	39.32	protein_coding	2511

## Sheet: GSE63885
Parametric p-value	FDR	Highly sensitive (1)	Moderately sensitive (2)	Resistant (3)	ProbeSet	Pairwise significant	Ensembl_ID	Gene_description	Chromosome_scaffold_name	Gene_start_bp	Gene_end_bp	Strand	Karyotype_band	Gene_name	Gene_GC_content	Gene_type	Gene_Length
0.0069713	0.265	579.11	365.26	414.56	204160_s_at	(2, 1)	ENSG00000001561	ectonucleotide pyrophosphatase/phosphodiesterase 4 [Source:HGNC Symbol;Acc:HGNC:3359]	chr6	46129989	46146688	1	p21.1	ENPP4	36.05	protein_coding	4644
0.0087749	0.282	552.67	445.96	351.21	202314_at	(3, 1)	ENSG00000001630	cytochrome P450 family 51 subfamily A member 1 [Source:HGNC Symbol;Acc:HGNC:2649]	chr7	92112153	92134803	-1	q21.2	CYP51A1	38.25	protein_coding	3529
0.0020058	0.177	94.23	82.79	139.94	219825_at	(2, 3)	ENSG00000003137	cytochrome P450 family 26 subfamily B member 1 [Source:HGNC Symbol;Acc:HGNC:20581]	chr2	72129238	72147862	-1	p13.2	CYP26B1	59.85	protein_coding	4839
0.0013667	0.169	617.41	548.11	413.84	207871_s_at	(3, 1), (3, 2)	ENSG00000004866	suppression of tumorigenicity 7 [Source:HGNC Symbol;Acc:HGNC:11351]	chr7	116953238	117230176	1	q31.2	ST7	39.15	protein_coding	6526
0.0097815	0.286	125.05	174.7	158.96	215833_s_at	(1, 2)	ENSG00000005206	signal peptide peptidase like 2B [Source:HGNC Symbol;Acc:HGNC:30627]	chr19	2328615	2355095	1	p13.3	SPPL2B	61.04	protein_coding	7419
0.0001599	0.0916	182.48	91.91	102.6	225142_at	(2, 1), (3, 1)	ENSG00000006459	lysine demethylase 7A [Source:HGNC Symbol;Acc:HGNC:22224]	chr7	140084746	140176983	-1	q34	KDM7A	39.15	protein_coding	9378
0.0004946	0.134	100.91	191.35	147.02	210816_s_at	(1, 2)	ENSG00000008283	cytochrome b561 [Source:HGNC Symbol;Acc:HGNC:2571]	chr17	63432304	63446354	-1	q23.3	CYB561	57.39	protein_coding	5296
6.63e-05	0.0569	325.25	619.5	589.13	228638_at	(1, 2), (1, 3)	ENSG00000009780	family with sequence similarity 76 member A [Source:HGNC Symbol;Acc:HGNC:28530]	chr1	27725961	27763116	1	p35.3	FAM76A	43.38	protein_coding	4046
0.0082914	0.281	725.92	531.12	561.79	212954_at	(2, 1), (3, 1)	ENSG00000010219	dual specificity tyrosine phosphorylation regulated kinase 4 [Source:HGNC Symbol;Acc:HGNC:3095]	chr12	4562204	4615302	1	p13.32	DYRK4	42.77	protein_coding	7054
0.0043459	0.22	741.51	470.93	449.74	201774_s_at	(2, 1), (3, 1)	ENSG00000010292	non-SMC condensin I complex subunit D2 [Source:HGNC Symbol;Acc:HGNC:24305]	chr12	6493356	6531955	1	p13.31	NCAPD2	46.34	protein_coding	6470
0.0001687	0.0931	547.94	368.53	517.09	218311_at	(2, 1), (2, 3)	ENSG00000011566	mitogen-activated protein kinase kinase kinase kinase 3 [Source:HGNC Symbol;Acc:HGNC:6865]	chr2	39249266	39437301	-1	p22.1	MAP4K3	36.89	protein_coding	6056
0.0004026	0.13	536.48	971.3	772.59	200752_s_at	(1, 2)	ENSG00000014216	calpain 1 [Source:HGNC Symbol;Acc:HGNC:1476]	chr11	65180566	65212006	1	q13.1	CAPN1	51.18	protein_coding	7506
0.0059225	0.25	167.91	286.71	204.3	236356_at	(1, 2)	ENSG00000023228	NADH:ubiquinone oxidoreductase core subunit S1 [Source:HGNC Symbol;Acc:HGNC:7707]	chr2	206114817	206159509	-1	q33.3	NDUFS1	40.76	protein_coding	12174
0.0091611	0.283	471.46	331.56	371.66	212103_at	(2, 1)	ENSG00000025800	karyopherin subunit alpha 6 [Source:HGNC Symbol;Acc:HGNC:6399]	chr1	32108056	32176563	1	p35.2	KPNA6	44.21	protein_coding	7457
0.00071	0.141	234.58	344.34	302.66	210120_s_at	(1, 2), (1, 3)	ENSG00000031823	RAN binding protein 3 [Source:HGNC Symbol;Acc:HGNC:9850]	chr19	5916139	5978142	-1	p13.3	RANBP3	52.74	protein_coding	7445
0.0058004	0.25	485.59	349.3	464.15	204332_s_at	(2, 3)	ENSG00000038002	aspartylglucosaminidase [Source:HGNC Symbol;Acc:HGNC:318]	chr4	177430774	177442437	-1	q34.3	AGA	39.69	protein_coding	2605
0.0033607	0.205	264.18	177.52	269.43	204333_s_at	(2, 3)	ENSG00000038002	aspartylglucosaminidase [Source:HGNC Symbol;Acc:HGNC:318]	chr4	177430774	177442437	-1	q34.3	AGA	39.69	protein_coding	2605
0.0055102	0.244	47.64	65.61	55.06	217620_s_at	(1, 2)	ENSG00000051382	phosphatidylinositol-4,5-bisphosphate 3-kinase catalytic subunit beta [Source:HGNC Symbol;Acc:HGNC:8976]	chr3	138652698	138834928	-1	q22.3	PIK3CB	40.59	protein_coding	7841
0.0040614	0.214	361.99	563.51	478.23	212002_at	(1, 2)	ENSG00000055070	SUZ RNA binding domain containing 1 [Source:HGNC Symbol;Acc:HGNC:30232]	chr1	16352575	16398145	1	p36.13	SZRD1	48.1	protein_coding	4742
0.000446	0.132	102.78	148.68	137.67	234106_s_at	(1, 2), (1, 3)	ENSG00000059122	FLYWCH-type zinc finger 1 [Source:HGNC Symbol;Acc:HGNC:25404]	chr16	2911931	2951208	1	p13.3	FLYWCH1	52.32	protein_coding	8425
0.0024967	0.189	96.48	117.74	83.9	228634_s_at	(3, 2)	ENSG00000060138	Y-box binding protein 3 [Source:HGNC Symbol;Acc:HGNC:2428]	chr12	10699089	10723323	-1	p13.2	YBX3	39.08	protein_coding	8621
0.0057569	0.249	2603.37	2575.68	1845.15	201161_s_at	(3, 2)	ENSG00000060138	Y-box binding protein 3 [Source:HGNC Symbol;Acc:HGNC:2428]	chr12	10699089	10723323	-1	p13.2	YBX3	39.08	protein_coding	8621
0.0079418	0.275	100.03	148.43	112.62	211513_s_at	(1, 2)	ENSG00000060491	opioid growth factor receptor [Source:HGNC Symbol;Acc:HGNC:15768]	chr20	62804835	62814000	1	q13.33	OGFR	63.45	protein_coding	4702
5.64e-05	0.0569	710.14	1172.28	924.21	229982_at	(1, 2), (3, 2)	ENSG00000060749	glutamine and serine rich 1 [Source:HGNC Symbol;Acc:HGNC:26154]	chr11	32892811	32993316	1	p13	QSER1	38.69	protein_coding	10908
0.008026	0.276	143.66	205.73	176.67	202773_s_at	(1, 2)	ENSG00000061936	splicing factor SWAP [Source:HGNC Symbol;Acc:HGNC:10790]	chr12	131711081	131799738	1	q24.33	SFSWAP	46.45	protein_coding	10158
0.0068159	0.264	763.63	585.82	539.25	225382_at	(3, 1)	ENSG00000063587	zinc finger protein 275 [Source:HGNC Symbol;Acc:HGNC:13069]	chrX	153334147	153360110	1	q28	ZNF275	49.09	protein_coding	8147
0.0019899	0.177	59.38	151.67	112.3	214975_s_at	(1, 2)	ENSG00000063601	myotubularin related protein 1 [Source:HGNC Symbol;Acc:HGNC:7449]	chrX	150692971	150765108	1	q28	MTMR1	42.48	protein_coding	6328
2.98e-05	0.0569	129.1	297.37	207.83	209113_s_at	(1, 2), (1, 3), (3, 2)	ENSG00000064961	high mobility group 20B [Source:HGNC Symbol;Acc:HGNC:5002]	chr19	3572777	3579088	1	p13.3	HMG20B	65.34	protein_coding	3857
0.0001443	0.0916	561.01	882.33	631.65	210719_s_at	(1, 2), (3, 2)	ENSG00000064961	high mobility group 20B [Source:HGNC Symbol;Acc:HGNC:5002]	chr19	3572777	3579088	1	p13.3	HMG20B	65.34	protein_coding	3857
0.0020867	0.179	93.15	138.55	117.74	210974_s_at	(1, 2)	ENSG00000065000	adaptor related protein complex 3 subunit delta 1 [Source:HGNC Symbol;Acc:HGNC:568]	chr19	2100988	2164468	-1	p13.3	AP3D1	56.41	protein_coding	8613
0.0002281	0.101	281.44	453.02	363.31	208710_s_at	(1, 2)	ENSG00000065000	adaptor related protein complex 3 subunit delta 1 [Source:HGNC Symbol;Acc:HGNC:568]	chr19	2100988	2164468	-1	p13.3	AP3D1	56.41	protein_coding	8613
0.0003314	0.12	250.91	127.63	191.23	203999_at	(2, 1), (2, 3)	ENSG00000067715	synaptotagmin 1 [Source:HGNC Symbol;Acc:HGNC:11509]	chr12	78863993	79452008	1	q21.2	SYT1	35.61	protein_coding	6389
0.008448	0.281	836.63	600.4	748.65	203087_s_at	(2, 1)	ENSG00000068796	kinesin family member 2A [Source:HGNC Symbol;Acc:HGNC:6318]	chr5	62306162	62391025	1	q12.1	KIF2A	38.5	protein_coding	13050
0.0094461	0.286	1079.39	785.18	1006.06	212219_at	(2, 3)	ENSG00000068878	proteasome activator subunit 4 [Source:HGNC Symbol;Acc:HGNC:20635]	chr2	53864069	53970993	-1	p16.2	PSME4	38.04	protein_coding	10392
0.0008788	0.149	630.47	688.39	488.42	226994_at	(3, 2)	ENSG00000069345	DnaJ heat shock protein family (Hsp40) member A2 [Source:HGNC Symbol;Acc:HGNC:14884]	chr16	46955362	46973674	-1	q11.2	DNAJA2	42.53	protein_coding	4951
0.0052487	0.241	261.41	137.53	129.3	214240_at	(2, 1), (3, 1)	ENSG00000069482	galanin and GMAP prepropeptide [Source:HGNC Symbol;Acc:HGNC:4114]	chr11	68683779	68691175	1	q13.2	GAL	57.14	protein_coding	1300
0.0079273	0.275	1600.36	1006.61	1160.54	225745_at	(2, 1)	ENSG00000070018	LDL receptor related protein 6 [Source:HGNC Symbol;Acc:HGNC:6698]	chr12	12116025	12267044	-1	p13.2	LRP6	38.54	protein_coding	10369
0.001893	0.175	2691.62	1919.88	2070.33	224596_at	(2, 1), (3, 1)	ENSG00000070214	solute carrier family 44 member 1 [Source:HGNC Symbol;Acc:HGNC:18798]	chr9	105244622	105439171	1	q31.1	SLC44A1	38.86	protein_coding	12172
0.0040703	0.214	188.68	387.76	309.73	210935_s_at	(1, 2)	ENSG00000071127	WD repeat domain 1 [Source:HGNC Symbol;Acc:HGNC:12754]	chr4	10074339	10116949	-1	p16.1	WDR1	54.98	protein_coding	7827
0.0035957	0.212	112.78	167.89	135.71	201638_s_at	(1, 2)	ENSG00000071894	cleavage and polyadenylation specific factor 1 [Source:HGNC Symbol;Acc:HGNC:2324]	chr8	144393229	144409335	-1	q24.3	CPSF1	59.96	protein_coding	6058
0.0032311	0.204	93.23	150.01	114.71	233167_at	(1, 2)	ENSG00000073169	selenoprotein O [Source:HGNC Symbol;Acc:HGNC:30395]	chr22	50200979	50217616	1	q13.33	SELENOO	55.78	protein_coding	2363
0.0038977	0.214	170.94	310.5	228.09	208920_at	(1, 2)	ENSG00000075142	sorcin [Source:HGNC Symbol;Acc:HGNC:11292]	chr7	88205115	88226993	-1	q21.12	SRI	39.54	protein_coding	4226
0.0039042	0.214	144.59	92.01	106.68	219026_s_at	(2, 1)	ENSG00000075391	RAS protein activator like 2 [Source:HGNC Symbol;Acc:HGNC:9874]	chr1	178094104	178484147	1	q25.2	RASAL2	37	protein_coding	16081
0.0076928	0.271	145.92	101.7	117.07	235439_at	(2, 1)	ENSG00000076067	RNA binding motif single stranded interacting protein 2 [Source:HGNC Symbol;Acc:HGNC:9909]	chr12	56521820	56596193	1	q13.3	RBMS2	44.05	protein_coding	8914
0.0064097	0.255	529.79	350.69	462.62	211340_s_at	(2, 1)	ENSG00000076706	melanoma cell adhesion molecule [Source:HGNC Symbol;Acc:HGNC:6934]	chr11	119308529	119321521	-1	q23.3	MCAM	59.59	protein_coding	7422
0.0061519	0.255	702.32	1025.67	693.75	229498_at	(3, 2)	ENSG00000076770	muscleblind like splicing regulator 3 [Source:HGNC Symbol;Acc:HGNC:20564]	chrX	132369317	132489968	-1	q26.2	MBNL3	36.96	protein_coding	12846
0.0014778	0.169	193.45	286.31	227.9	226053_at	(1, 2), (3, 2)	ENSG00000076984	mitogen-activated protein kinase kinase 7 [Source:HGNC Symbol;Acc:HGNC:6847]	chr19	7903843	7914478	1	p13.2	MAP2K7	63.14	protein_coding	5145
0.0042803	0.22	126.08	217.14	162	207535_s_at	(1, 2)	ENSG00000077150	nuclear factor kappa B subunit 2 [Source:HGNC Symbol;Acc:HGNC:7795]	chr10	102394110	102402524	1	q24.32	NFKB2	61.37	protein_coding	4714
0.0092845	0.284	477.65	281.75	339.68	219099_at	(2, 1)	ENSG00000078237	TP53 induced glycolysis regulatory phosphatase [Source:HGNC Symbol;Acc:HGNC:1185]	chr12	4307763	4360028	1	p13.32	TIGAR	41.85	protein_coding	9444
0.001493	0.169	76.69	108.47	105.26	227149_at	(1, 2), (1, 3)	ENSG00000078687	trinucleotide repeat containing adaptor 6C [Source:HGNC Symbol;Acc:HGNC:29318]	chr17	77959240	78108835	1	q25.3	TNRC6C	42.22	protein_coding	11111
0.0084272	0.281	314.11	228.33	266.4	209744_x_at	(2, 1)	ENSG00000078747	itchy E3 ubiquitin protein ligase [Source:HGNC Symbol;Acc:HGNC:13890]	chr20	34363241	34540748	1	q11.22	ITCH	41.77	protein_coding	10639
0.0062607	0.255	122.95	73.46	98.32	203946_s_at	(2, 1)	ENSG00000081181	arginase 2 [Source:HGNC Symbol;Acc:HGNC:664]	chr14	67619920	67651708	1	q24.1	ARG2	42.07	protein_coding	2284
0.0053734	0.242	1262.27	848.95	971.39	200827_at	(2, 1)	ENSG00000083444	procollagen-lysine,2-oxoglutarate 5-dioxygenase 1 [Source:HGNC Symbol;Acc:HGNC:9081]	chr1	11934205	11975538	1	p36.22	PLOD1	53.54	protein_coding	5320
0.0028818	0.194	421.69	614.82	495.14	205917_at	(1, 2)	ENSG00000083844	zinc finger protein 264 [Source:HGNC Symbol;Acc:HGNC:13057]	chr19	57191500	57222846	1	q13.43	ZNF264	44.47	protein_coding	12532
0.004575	0.225	3958.14	2644.38	2722.8	208702_x_at	(2, 1), (3, 1)	ENSG00000084234	amyloid beta precursor like protein 2 [Source:HGNC Symbol;Acc:HGNC:598]	chr11	130068147	130144811	1	q24.3	APLP2	43.97	protein_coding	7463
0.0069558	0.265	2671.68	1813.27	1844.11	214875_x_at	(2, 1), (3, 1)	ENSG00000084234	amyloid beta precursor like protein 2 [Source:HGNC Symbol;Acc:HGNC:598]	chr11	130068147	130144811	1	q24.3	APLP2	43.97	protein_coding	7463
0.0020635	0.179	2334.61	1499.99	1595.36	211404_s_at	(2, 1), (3, 1)	ENSG00000084234	amyloid beta precursor like protein 2 [Source:HGNC Symbol;Acc:HGNC:598]	chr11	130068147	130144811	1	q24.3	APLP2	43.97	protein_coding	7463
0.0019782	0.177	687.09	508.45	654.12	209106_at	(2, 1), (2, 3)	ENSG00000084676	nuclear receptor coactivator 1 [Source:HGNC Symbol;Acc:HGNC:7668]	chr2	24491254	24770702	1	p23.3	NCOA1	37.19	protein_coding	8982
0.0005898	0.134	691.49	1118.97	1032.76	208629_s_at	(1, 2), (1, 3)	ENSG00000084754	hydroxyacyl-CoA dehydrogenase trifunctional multienzyme complex subunit alpha [Source:HGNC Symbol;Acc:HGNC:4801]	chr2	26190635	26244672	-1	p23.3	HADHA	41.91	protein_coding	4331
0.0044222	0.222	284.29	215.05	181.97	223225_s_at	(3, 1)	ENSG00000085415	SEH1 like nucleoporin [Source:HGNC Symbol;Acc:HGNC:30379]	chr18	12947133	12987536	1	p11.21	SEH1L	43.55	protein_coding	10481
0.0017798	0.174	1320.35	1294.35	997.08	221931_s_at	(3, 1), (3, 2)	ENSG00000085415	SEH1 like nucleoporin [Source:HGNC Symbol;Acc:HGNC:30379]	chr18	12947133	12987536	1	p11.21	SEH1L	43.55	protein_coding	10481
0.0018872	0.175	142.7	268.67	193.57	233638_s_at	(1, 2)	ENSG00000085998	protein O-linked mannose N-acetylglucosaminyltransferase 1 (beta 1,2-) [Source:HGNC Symbol;Acc:HGNC:19139]	chr1	46188682	46220305	-1	p34.1	POMGNT1	49.39	protein_coding	6189
0.0086492	0.282	108.2	167.11	135.22	201679_at	(1, 2)	ENSG00000087087	serrate, RNA effector molecule [Source:HGNC Symbol;Acc:HGNC:24101]	chr7	100875103	100888664	1	q22.1	SRRT	53.16	protein_coding	4858
0.0051839	0.24	42.15	63.01	52.31	211141_s_at	(1, 2)	ENSG00000088038	CCR4-NOT transcription complex subunit 3 [Source:HGNC Symbol;Acc:HGNC:7879]	chr19	54137749	54155681	1	q13.42	CNOT3	57.9	protein_coding	6821
0.0035741	0.212	115.15	224.8	149.94	203239_s_at	(1, 2)	ENSG00000088038	CCR4-NOT transcription complex subunit 3 [Source:HGNC Symbol;Acc:HGNC:7879]	chr19	54137749	54155681	1	q13.42	CNOT3	57.9	protein_coding	6821
0.0023435	0.185	113.99	166.95	131.42	231829_at	(1, 2), (3, 2)	ENSG00000088888	mitochondrial antiviral signaling protein [Source:HGNC Symbol;Acc:HGNC:29233]	chr20	3846799	3876123	1	p13	MAVS	52.52	protein_coding	11771
0.0089973	0.282	80.33	129.18	110.47	211823_s_at	(1, 2)	ENSG00000089159	paxillin [Source:HGNC Symbol;Acc:HGNC:9718]	chr12	120210439	120265771	-1	q24.23	PXN	53.01	protein_coding	7460
0.001829	0.174	321.36	179.51	169.5	203304_at	(2, 1), (3, 1)	ENSG00000095739	BMP and activin membrane bound inhibitor [Source:HGNC Symbol;Acc:HGNC:30251]	chr10	28677510	28682932	1	p12.1	BAMBI	46.04	protein_coding	2139
0.0090844	0.282	234.07	390.63	317.28	230142_s_at	(1, 2)	ENSG00000099622	cold inducible RNA binding protein [Source:HGNC Symbol;Acc:HGNC:1982]	chr19	1259384	1274880	1	p13.3	CIRBP	62.55	protein_coding	6368
0.0036701	0.213	963.45	1515.58	1209.44	213041_s_at	(1, 2)	ENSG00000099624	ATP synthase F1 subunit delta [Source:HGNC Symbol;Acc:HGNC:837]	chr19	1241746	1244825	1	p13.3	ATP5F1D	62.95	protein_coding	2249
0.0015742	0.169	280.08	675.29	506.88	213887_s_at	(1, 2)	ENSG00000099817	RNA polymerase II, I and III subunit E [Source:HGNC Symbol;Acc:HGNC:9192]	chr19	1086574	1095380	-1	p13.3	POLR2E	61.47	protein_coding	4870
0.007296	0.268	115.13	184.49	150.24	215357_s_at	(1, 2)	ENSG00000100227	DNA polymerase delta interacting protein 3 [Source:HGNC Symbol;Acc:HGNC:23782]	chr22	42583721	42614962	-1	q13.2	POLDIP3	49.1	protein_coding	3650
0.002763	0.194	159.44	252.45	206.45	212393_at	(1, 2)	ENSG00000100241	SET binding factor 1 [Source:HGNC Symbol;Acc:HGNC:10542]	chr22	50445000	50475035	-1	q13.33	SBF1	60.68	protein_coding	9452
0.0086665	0.282	744.97	560.26	538.1	202221_s_at	(2, 1), (3, 1)	ENSG00000100393	E1A binding protein p300 [Source:HGNC Symbol;Acc:HGNC:3373]	chr22	41092592	41180077	1	q13.2	EP300	42.02	protein_coding	11692
0.0005813	0.134	181.16	445.57	331.3	208879_x_at	(1, 2), (1, 3)	ENSG00000101161	pre-mRNA processing factor 6 [Source:HGNC Symbol;Acc:HGNC:15860]	chr20	63981132	64033100	1	q13.33	PRPF6	50.53	protein_coding	3047
0.0017912	0.174	327.8	476.55	397.71	212073_at	(1, 2)	ENSG00000101266	casein kinase 2 alpha 1 [Source:HGNC Symbol;Acc:HGNC:2457]	chr20	472498	543835	-1	p13	CSNK2A1	41.35	protein_coding	29523
0.0032477	0.204	130.03	168.62	132.4	1555977_at	(3, 2)	ENSG00000101608	myosin light chain 12A [Source:HGNC Symbol;Acc:HGNC:16701]	chr18	3247481	3256236	1	p11.31	MYL12A	38.81	protein_coding	3032
0.0050787	0.24	58.61	73.68	53.83	1555978_s_at	(3, 2)	ENSG00000101608	myosin light chain 12A [Source:HGNC Symbol;Acc:HGNC:16701]	chr18	3247481	3256236	1	p11.31	MYL12A	38.81	protein_coding	3032
0.0049498	0.237	276.55	181.06	167.42	52285_f_at	(2, 1), (3, 1)	ENSG00000101624	centrosomal protein 76 [Source:HGNC Symbol;Acc:HGNC:25727]	chr18	12661833	12702777	-1	p11.21	CEP76	40.84	protein_coding	6165
0.0057334	0.249	368.82	312.65	271.79	218827_s_at	(3, 1)	ENSG00000101639	centrosomal protein 192 [Source:HGNC Symbol;Acc:HGNC:25515]	chr18	12991362	13125052	1	p11.21	CEP192	40.44	protein_coding	9901
0.0004361	0.132	245.42	95.09	124.23	227048_at	(2, 1), (3, 1)	ENSG00000101680	laminin subunit alpha 1 [Source:HGNC Symbol;Acc:HGNC:6481]	chr18	6941742	7117797	-1	p11.31	LAMA1	43.13	protein_coding	15857
0.0031578	0.202	121.09	294.18	220.05	1558080_s_at	(1, 2)	ENSG00000102580	DnaJ heat shock protein family (Hsp40) member C3 [Source:HGNC Symbol;Acc:HGNC:9439]	chr13	95677139	95794988	1	q32.1	DNAJC3	39.79	protein_coding	5590
0.0027913	0.194	31.68	59.3	41.85	235412_at	(1, 2)	ENSG00000102606	Rho guanine nucleotide exchange factor 7 [Source:HGNC Symbol;Acc:HGNC:15607]	chr13	111114559	111305737	1	q34	ARHGEF7	44.55	protein_coding	11768
0.002801	0.194	416.93	612.12	526.67	212604_at	(1, 2)	ENSG00000102738	mitochondrial ribosomal protein S31 [Source:HGNC Symbol;Acc:HGNC:16632]	chr13	40729128	40771190	-1	q14.11	MRPS31	39.2	protein_coding	2148
0.0059645	0.251	225.64	132.88	158.52	226498_at	(2, 1)	ENSG00000102755	fms related receptor tyrosine kinase 1 [Source:HGNC Symbol;Acc:HGNC:3763]	chr13	28300346	28495145	-1	q12.3	FLT1	41.61	protein_coding	12565
0.0012226	0.166	1313.76	3195.77	2091.61	204885_s_at	(1, 2)	ENSG00000102854	mesothelin [Source:HGNC Symbol;Acc:HGNC:7371]	chr16	760734	768865	1	p13.3	MSLN	66.92	protein_coding	2588
0.0075955	0.271	369.78	319.04	263.54	202739_s_at	(3, 1)	ENSG00000102893	phosphorylase kinase regulatory subunit beta [Source:HGNC Symbol;Acc:HGNC:8927]	chr16	47461123	47701523	1	q12.1	PHKB	38.19	protein_coding	11822
0.0070022	0.266	36.4	48.73	39.59	228295_at	(1, 2), (3, 2)	ENSG00000103091	WD repeat domain 59 [Source:HGNC Symbol;Acc:HGNC:25706]	chr16	74871362	75000173	-1	q23.1	WDR59	44.73	protein_coding	9402
0.0076965	0.271	168.1	257.96	231.41	209136_s_at	(1, 2)	ENSG00000103194	ubiquitin specific peptidase 10 [Source:HGNC Symbol;Acc:HGNC:12608]	chr16	84699986	84779922	1	q24.1	USP10	43.62	protein_coding	5075
0.0070501	0.266	326.65	570.02	422.31	232269_x_at	(1, 2)	ENSG00000103260	meteorin, glial cell differentiation regulator [Source:HGNC Symbol;Acc:HGNC:14151]	chr16	715118	719655	1	p13.3	METRN	66.79	protein_coding	3689
0.0077603	0.273	290.35	527.52	380.98	219051_x_at	(1, 2)	ENSG00000103260	meteorin, glial cell differentiation regulator [Source:HGNC Symbol;Acc:HGNC:14151]	chr16	715118	719655	1	p13.3	METRN	66.79	protein_coding	3689
0.0034275	0.208	197.64	283.48	213.3	204275_at	(1, 2), (3, 2)	ENSG00000103326	calpain 15 [Source:HGNC Symbol;Acc:HGNC:11182]	chr16	527712	554636	1	p13.3	CAPN15	65	protein_coding	7992
0.0026205	0.192	95.05	150.2	121.43	214190_x_at	(1, 2)	ENSG00000103365	golgi associated, gamma adaptin ear containing, ARF binding protein 2 [Source:HGNC Symbol;Acc:HGNC:16064]	chr16	23463542	23521995	-1	p12.2	GGA2	47.76	protein_coding	8231
0.00042	0.132	280.71	178.59	284.18	229053_at	(2, 1), (2, 3)	ENSG00000103528	synaptotagmin 17 [Source:HGNC Symbol;Acc:HGNC:24119]	chr16	19167971	19268332	1	p12.3	SYT17	45.9	protein_coding	7545
0.0091726	0.283	341.75	252.58	337.78	205613_at	(2, 3)	ENSG00000103528	synaptotagmin 17 [Source:HGNC Symbol;Acc:HGNC:24119]	chr16	19167971	19268332	1	p12.3	SYT17	45.9	protein_coding	7545
0.0045985	0.226	85.37	141.5	121.23	213087_s_at	(1, 2)	ENSG00000104529	eukaryotic translation elongation factor 1 delta [Source:HGNC Symbol;Acc:HGNC:3211]	chr8	143579697	143599541	-1	q24.3	EEF1D	61.99	protein_coding	9390
0.0006596	0.14	286.27	594.02	432.45	200646_s_at	(1, 2)	ENSG00000104805	nucleobindin 1 [Source:HGNC Symbol;Acc:HGNC:8043]	chr19	48900312	48923372	1	q13.33	NUCB1	52.75	protein_coding	3675
0.0060464	0.253	89.56	126.44	101.84	213121_at	(1, 2)	ENSG00000104852	small nuclear ribonucleoprotein U1 subunit 70 [Source:HGNC Symbol;Acc:HGNC:11150]	chr19	49085419	49108605	1	q13.33	SNRNP70	53.38	protein_coding	4684
0.0015354	0.169	306.13	803.02	570.54	211136_s_at	(1, 2)	ENSG00000104853	CLPTM1 regulator of GABA type A receptor forward trafficking [Source:HGNC Symbol;Acc:HGNC:2087]	chr19	44954585	44993341	1	q13.32	CLPTM1	52.83	protein_coding	5095
0.0005165	0.134	703.38	1096.67	811.89	217729_s_at	(1, 2), (3, 2)	ENSG00000104964	TLE family member 5, transcriptional modulator [Source:HGNC Symbol;Acc:HGNC:307]	chr19	3052910	3063107	-1	p13.3	TLE5	60.37	protein_coding	5236
0.0012166	0.166	473.33	796.31	734.59	229465_s_at	(1, 2), (1, 3)	ENSG00000105426	protein tyrosine phosphatase receptor type S [Source:HGNC Symbol;Acc:HGNC:9681]	chr19	5158495	5340803	-1	p13.3	PTPRS	52.47	protein_coding	8565
0.0090965	0.282	60.47	87.39	70.67	210585_s_at	(1, 2)	ENSG00000105576	transportin 2 [Source:HGNC Symbol;Acc:HGNC:19998]	chr19	12699201	12724011	-1	p13.13	TNPO2	54.01	protein_coding	7022
0.0003482	0.12	193.28	363.85	280.5	202407_s_at	(1, 2)	ENSG00000105618	pre-mRNA processing factor 31 [Source:HGNC Symbol;Acc:HGNC:15446]	chr19	54115410	54131719	1	q13.42	PRPF31	57.08	protein_coding	2673
0.0099466	0.287	183.12	259.44	231.58	208255_s_at	(1, 2)	ENSG00000105701	FKBP prolyl isomerase 8 [Source:HGNC Symbol;Acc:HGNC:3724]	chr19	18531751	18544077	-1	p13.11	FKBP8	56.64	protein_coding	2819
0.0023555	0.185	438.81	640.48	472.49	203643_at	(1, 2), (3, 2)	ENSG00000105722	ETS2 repressor factor [Source:HGNC Symbol;Acc:HGNC:3444]	chr19	42247569	42255128	-1	q13.2	ERF	64.05	protein_coding	3269
0.0030308	0.199	58.81	120.27	89.47	1552470_a_at	(1, 2)	ENSG00000106077	abhydrolase domain containing 11 [Source:HGNC Symbol;Acc:HGNC:16407]	chr7	73736094	73738852	-1	q11.23	ABHD11	60.02	protein_coding	2274
0.0010839	0.16	564.95	908.01	646.41	202290_at	(1, 2), (3, 2)	ENSG00000106244	PDGFA associated protein 1 [Source:HGNC Symbol;Acc:HGNC:14634]	chr7	99392048	99408597	-1	q22.1	PDAP1	53.84	protein_coding	2912
0.0090818	0.282	359.62	233.55	322.34	227525_at	(2, 1)	ENSG00000106415	glucocorticoid induced 1 [Source:HGNC Symbol;Acc:HGNC:18713]	chr7	7968796	8094272	1	p21.3	GLCCI1	36.7	protein_coding	6883
0.0090943	0.282	376.04	248.08	294.44	223490_s_at	(2, 1)	ENSG00000107371	exosome component 3 [Source:HGNC Symbol;Acc:HGNC:17944]	chr9	37759234	37832117	-1	p13.2	EXOSC3	40.9	protein_coding	7660
0.0087249	0.282	54.03	75.9	64.31	214216_s_at	(1, 2)	ENSG00000107929	La ribonucleoprotein 4B [Source:HGNC Symbol;Acc:HGNC:28987]	chr10	806914	931705	-1	p15.3	LARP4B	42.7	protein_coding	11610
0.0058605	0.25	22.92	34.05	32.04	238831_at	(1, 2), (1, 3)	ENSG00000109133	transmembrane protein 33 [Source:HGNC Symbol;Acc:HGNC:25541]	chr4	41935129	41960803	1	p13	TMEM33	35.28	protein_coding	8462
0.0098991	0.287	259.55	186.59	195.41	202341_s_at	(2, 1), (3, 1)	ENSG00000109654	tripartite motif containing 2 [Source:HGNC Symbol;Acc:HGNC:15974]	chr4	153152163	153339319	1	q31.3	TRIM2	42.07	protein_coding	16203
0.0070605	0.266	208.48	482.34	384.23	225869_s_at	(1, 2)	ENSG00000110057	unc-93 homolog B1, TLR signaling regulator [Source:HGNC Symbol;Acc:HGNC:13481]	chr11	67991100	68004982	-1	q13.2	UNC93B1	58.6	protein_coding	3536
0.0013387	0.169	189.76	269.96	208.45	203826_s_at	(1, 2), (3, 2)	ENSG00000110697	phosphatidylinositol transfer protein membrane associated 1 [Source:HGNC Symbol;Acc:HGNC:9003]	chr11	67491768	67506263	-1	q13.2	PITPNM1	62.46	protein_coding	6442
0.0038752	0.214	460.97	323.19	396.77	221260_s_at	(2, 1)	ENSG00000110925	cysteine and serine rich nuclear protein 2 [Source:HGNC Symbol;Acc:HGNC:16006]	chr12	51061205	51083664	-1	q13.12	CSRNP2	46.64	protein_coding	5230
0.0040749	0.214	85.52	138.51	108.24	210787_s_at	(1, 2)	ENSG00000110931	calcium/calmodulin dependent protein kinase kinase 2 [Source:HGNC Symbol;Acc:HGNC:1470]	chr12	121237675	121298308	-1	q24.31	CAMKK2	50.83	protein_coding	7173
0.0016442	0.169	1323.79	1000.5	923.94	214427_at	(2, 1), (3, 1)	ENSG00000111641	NOP2 nucleolar protein [Source:HGNC Symbol;Acc:HGNC:7867]	chr12	6556863	6568691	-1	p13.31	NOP2	49.45	protein_coding	4687
0.0039024	0.214	46.09	77.72	61.31	205461_at	(1, 2)	ENSG00000111737	RAB35, member RAS oncogene family [Source:HGNC Symbol;Acc:HGNC:9774]	chr12	120095099	120117502	-1	q24.23	RAB35	55.76	protein_coding	4018
0.0086042	0.282	601.94	443.46	731.13	218854_at	(2, 3)	ENSG00000111817	dermatan sulfate epimerase [Source:HGNC Symbol;Acc:HGNC:21144]	chr6	116254173	116444861	1	q22.1	DSE	38.2	protein_coding	19194
0.0086622	0.282	256.05	397.72	328.08	232392_at	(1, 2)	ENSG00000112081	serine and arginine rich splicing factor 3 [Source:HGNC Symbol;Acc:HGNC:10785]	chr6	36594353	36605600	1	p21.31	SRSF3	40.22	protein_coding	7118
0.0019136	0.175	390.89	170.78	218.72	209406_at	(2, 1), (3, 1)	ENSG00000112208	BAG cochaperone 2 [Source:HGNC Symbol;Acc:HGNC:938]	chr6	57172326	57189833	1	p12.1	BAG2	38.77	protein_coding	6651
0.0061841	0.255	562.75	332.33	441.79	204165_at	(2, 1)	ENSG00000112290	WASP family member 1 [Source:HGNC Symbol;Acc:HGNC:12732]	chr6	110099819	110180004	-1	q21	WASF1	36.65	protein_coding	3260
0.0003302	0.12	714.51	362.72	409.14	227803_at	(2, 1), (3, 1)	ENSG00000112796	ectonucleotide pyrophosphatase/phosphodiesterase family member 5 [Source:HGNC Symbol;Acc:HGNC:13717]	chr6	46159185	46170980	-1	p21.1	ENPP5	38.41	protein_coding	4275
0.0029545	0.196	316.97	192.35	199.54	237054_at	(2, 1), (3, 1)	ENSG00000112796	ectonucleotide pyrophosphatase/phosphodiesterase family member 5 [Source:HGNC Symbol;Acc:HGNC:13717]	chr6	46159185	46170980	-1	p21.1	ENPP5	38.41	protein_coding	4275
0.0068585	0.264	24.92	36.27	28.84	1568836_at	(1, 2)	ENSG00000113240	CDC like kinase 4 [Source:HGNC Symbol;Acc:HGNC:13659]	chr5	178602664	178630615	-1	q35.3	CLK4	39.49	protein_coding	7922
0.0055091	0.244	464.69	312.11	319.16	203439_s_at	(2, 1), (3, 1)	ENSG00000113739	stanniocalcin 2 [Source:HGNC Symbol;Acc:HGNC:11374]	chr5	173314723	173328447	-1	q35.2	STC2	50.41	protein_coding	5062
0.0095225	0.286	186.95	164.75	223.68	203589_s_at	(2, 3)	ENSG00000114126	transcription factor Dp-2 [Source:HGNC Symbol;Acc:HGNC:11751]	chr3	141944428	142149544	-1	q23	TFDP2	39.89	protein_coding	11897
1.32e-05	0.0569	46.01	27.82	29.96	213808_at	(2, 1), (3, 1)	ENSG00000114948	ADAM metallopeptidase domain 23 [Source:HGNC Symbol;Acc:HGNC:202]	chr2	206443532	206621127	1	q33.3	ADAM23	38.27	protein_coding	6425
0.0082276	0.281	230.27	413.81	326.32	201299_s_at	(1, 2)	ENSG00000114978	MOB kinase activator 1A [Source:HGNC Symbol;Acc:HGNC:16015]	chr2	74152528	74178898	-1	p13.1	MOB1A	41.02	protein_coding	6440
0.008812	0.282	847.56	538.04	720.57	210609_s_at	(2, 1)	ENSG00000115129	tumor protein p53 inducible protein 3 [Source:HGNC Symbol;Acc:HGNC:19373]	chr2	24077433	24085861	-1	p23.3	TP53I3	49.47	protein_coding	2312
0.009899	0.287	338.72	247.03	300.83	226342_at	(2, 1)	ENSG00000115306	spectrin beta, non-erythrocytic 1 [Source:HGNC Symbol;Acc:HGNC:11275]	chr2	54456317	54671446	1	p16.2	SPTBN1	42.78	protein_coding	18473
0.0084202	0.281	49.65	67.17	66.93	212650_at	(1, 2), (1, 3)	ENSG00000115504	EH domain binding protein 1 [Source:HGNC Symbol;Acc:HGNC:29144]	chr2	62673851	63046487	1	p15	EHBP1	36.7	protein_coding	8224
0.0091795	0.283	4411.43	3059.08	3926.26	200790_at	(2, 1)	ENSG00000115758	ornithine decarboxylase 1 [Source:HGNC Symbol;Acc:HGNC:8109]	chr2	10439968	10448327	-1	p25.1	ODC1	45.53	protein_coding	2791
0.0073193	0.268	502.33	367.45	492.21	212780_at	(2, 3)	ENSG00000115904	SOS Ras/Rac guanine nucleotide exchange factor 1 [Source:HGNC Symbol;Acc:HGNC:11187]	chr2	38981549	39124345	-1	p22.1	SOS1	37.81	protein_coding	9649
0.0012274	0.166	72.54	120.04	95.98	200879_s_at	(1, 2)	ENSG00000116016	endothelial PAS domain protein 1 [Source:HGNC Symbol;Acc:HGNC:3374]	chr2	46293667	46386697	1	p21	EPAS1	46.71	protein_coding	7291
0.0074506	0.268	68.09	103.94	77.57	1554847_at	(1, 2)	ENSG00000116039	ATPase H+ transporting V1 subunit B1 [Source:HGNC Symbol;Acc:HGNC:853]	chr2	70935900	70965431	1	p13.3	ATP6V1B1	50.19	protein_coding	2656
0.0011459	0.16	182.15	472.81	263.19	205473_at	(1, 2), (3, 2)	ENSG00000116039	ATPase H+ transporting V1 subunit B1 [Source:HGNC Symbol;Acc:HGNC:853]	chr2	70935900	70965431	1	p13.3	ATP6V1B1	50.19	protein_coding	2656
0.0013688	0.169	194.69	294.55	229.09	1567014_s_at	(1, 2), (3, 2)	ENSG00000116044	nuclear factor, erythroid 2 like 2 [Source:HGNC Symbol;Acc:HGNC:7782]	chr2	177227595	177392697	-1	q31.2	NFE2L2	40.63	protein_coding	5671
0.0089393	0.282	651.45	945.65	840.64	203458_at	(1, 2)	ENSG00000116096	sepiapterin reductase [Source:HGNC Symbol;Acc:HGNC:11257]	chr2	72887382	72892158	1	p13.2	SPR	54.62	protein_coding	1458
0.0082359	0.281	138.83	259.56	201.77	216205_s_at	(1, 2)	ENSG00000116688	mitofusin 2 [Source:HGNC Symbol;Acc:HGNC:16877]	chr1	11980181	12015211	1	p36.22	MFN2	50.93	protein_coding	10234
0.0045137	0.224	584.15	316.94	428.57	202007_at	(2, 1)	ENSG00000116962	nidogen 1 [Source:HGNC Symbol;Acc:HGNC:7821]	chr1	235975830	236065109	-1	q42.3	NID1	44.97	protein_coding	5811
0.0086165	0.282	209.78	147.29	136.24	229529_at	(3, 1)	ENSG00000118526	transcription factor 21 [Source:HGNC Symbol;Acc:HGNC:11632]	chr6	133889113	133895553	1	q23.2	TCF21	47.65	protein_coding	3679
0.0079015	0.275	808.61	675	905.4	225082_at	(2, 3)	ENSG00000119203	cleavage and polyadenylation specific factor 3 [Source:HGNC Symbol;Acc:HGNC:2326]	chr2	9423651	9473101	1	p25.1	CPSF3	42.05	protein_coding	3686
0.0050655	0.24	746.58	504.95	714.86	222640_at	(2, 3)	ENSG00000119772	DNA methyltransferase 3 alpha [Source:HGNC Symbol;Acc:HGNC:2978]	chr2	25227855	25342590	-1	p23.3	DNMT3A	53.43	protein_coding	13782
0.0001422	0.0916	273.58	180.95	259.57	213387_at	(2, 1), (2, 3)	ENSG00000119778	ATPase family AAA domain containing 2B [Source:HGNC Symbol;Acc:HGNC:29230]	chr2	23748664	23927123	-1	p23.3	ATAD2B	37.99	protein_coding	10501
0.0084238	0.281	577.73	775.78	611.23	208813_at	(3, 2)	ENSG00000120053	glutamic-oxaloacetic transaminase 1 [Source:HGNC Symbol;Acc:HGNC:4432]	chr10	99396870	99430624	-1	q24.2	GOT1	42.9	protein_coding	2424
0.0072322	0.267	88.19	38.93	47.92	229667_s_at	(2, 1)	ENSG00000120068	homeobox B8 [Source:HGNC Symbol;Acc:HGNC:5119]	chr17	48611377	48615292	-1	q21.32	HOXB8	57.84	protein_coding	2404
0.0022954	0.185	763.79	487.78	680.28	218217_at	(2, 1), (2, 3)	ENSG00000121064	serine carboxypeptidase 1 [Source:HGNC Symbol;Acc:HGNC:29507]	chr17	56978129	57006768	1	q22	SCPEP1	45.28	protein_coding	3829
0.0052223	0.241	395.65	286.18	321.66	209760_at	(2, 1)	ENSG00000121210	transmembrane 131 like [Source:HGNC Symbol;Acc:HGNC:29146]	chr4	153466346	153636711	1	q31.3	TMEM131L	41.78	protein_coding	6393
0.0054019	0.243	201.96	290.24	231.54	217593_at	(1, 2)	ENSG00000121413	zinc finger and SCAN domain containing 18 [Source:HGNC Symbol;Acc:HGNC:21037]	chr19	58083838	58118427	-1	q13.43	ZSCAN18	50.18	protein_coding	8175
0.0042181	0.219	544.76	254.1	393.45	212915_at	(2, 1)	ENSG00000121440	PDZ domain containing ring finger 3 [Source:HGNC Symbol;Acc:HGNC:17704]	chr3	73382431	73624941	-1	p13	PDZRN3	41.51	protein_coding	6139
0.0031473	0.202	569.15	861.46	565.03	220954_s_at	(3, 2)	ENSG00000121716	paired immunoglobin like type 2 receptor beta [Source:HGNC Symbol;Acc:HGNC:18297]	chr7	100352176	100367733	1	q22.1	PILRB	53.3	protein_coding	5764
0.0010768	0.16	143.82	227.18	167.31	214045_at	(1, 2), (3, 2)	ENSG00000121897	lipoic acid synthetase [Source:HGNC Symbol;Acc:HGNC:16429]	chr4	39459004	39485109	1	p14	LIAS	41.36	protein_coding	11318
0.0007191	0.141	174.84	102.2	118.24	223575_at	(2, 1), (3, 1)	ENSG00000122778	KIAA1549 [Source:HGNC Symbol;Acc:HGNC:22219]	chr7	138831381	138981389	-1	q34	KIAA1549	44.27	protein_coding	12498
0.0098484	0.286	577.27	397.12	443.22	213301_x_at	(2, 1)	ENSG00000122779	tripartite motif containing 24 [Source:HGNC Symbol;Acc:HGNC:11812]	chr7	138460259	138589996	1	q33	TRIM24	39.2	protein_coding	9301
0.0058487	0.25	445.12	309.84	341.81	204391_x_at	(2, 1)	ENSG00000122779	tripartite motif containing 24 [Source:HGNC Symbol;Acc:HGNC:11812]	chr7	138460259	138589996	1	q33	TRIM24	39.2	protein_coding	9301
0.0073557	0.268	297.29	222.76	283.69	225943_at	(2, 3)	ENSG00000123213	neurolysin [Source:HGNC Symbol;Acc:HGNC:16058]	chr5	65722205	65871725	1	q12.3	NLN	40.37	protein_coding	10939
0.0014865	0.169	268.44	406.17	329.31	210778_s_at	(1, 2)	ENSG00000123933	MAX dimerization protein 4 [Source:HGNC Symbol;Acc:HGNC:13906]	chr4	2247432	2262109	-1	p16.3	MXD4	62.79	protein_coding	6873
0.0013872	0.169	2005.26	1408.15	1917.25	201111_at	(2, 1), (2, 3)	ENSG00000124207	chromosome segregation 1 like [Source:HGNC Symbol;Acc:HGNC:2431]	chr20	49046246	49096960	1	q13.13	CSE1L	41.33	protein_coding	3800
0.0028504	0.194	725.7	502.38	614.54	218360_at	(2, 1)	ENSG00000124209	RAB22A, member RAS oncogene family [Source:HGNC Symbol;Acc:HGNC:9764]	chr20	58309715	58367507	1	q13.32	RAB22A	41.45	protein_coding	9266
0.0014486	0.169	266.19	432	373.59	221868_at	(1, 2), (1, 3)	ENSG00000124374	poly(A) binding protein interacting protein 2B [Source:HGNC Symbol;Acc:HGNC:29200]	chr2	71182738	71227103	-1	p13.3	PAIP2B	40.16	protein_coding	6300
0.0009039	0.149	32.39	77.42	52.25	230543_at	(1, 2)	ENSG00000124486	ubiquitin specific peptidase 9 X-linked [Source:HGNC Symbol;Acc:HGNC:12632]	chrX	41085445	41236579	1	p11.4	USP9X	38.54	protein_coding	14152
0.0033102	0.204	3015.81	2265.85	2251.83	218061_at	(2, 1), (3, 1)	ENSG00000124733	male-enhanced antigen 1 [Source:HGNC Symbol;Acc:HGNC:6986]	chr6	43011143	43016868	-1	p21.1	MEA1	54.79	protein_coding	3017
0.0062183	0.255	104.69	153.05	137.43	231003_at	(1, 2)	ENSG00000124786	solute carrier family 35 member B3 [Source:HGNC Symbol;Acc:HGNC:21601]	chr6	8411435	8435561	-1	p24.3	SLC35B3	34.78	protein_coding	3990
0.0003298	0.12	86.67	149.3	101.87	235281_x_at	(1, 2), (3, 2)	ENSG00000124942	AHNAK nucleoprotein [Source:HGNC Symbol;Acc:HGNC:347]	chr11	62433542	62556235	-1	q12.3	AHNAK	50.05	protein_coding	19466
0.003979	0.214	95.28	162.85	125.23	215923_s_at	(1, 2)	ENSG00000125637	pleckstrin and Sec7 domain containing 4 [Source:HGNC Symbol;Acc:HGNC:19096]	chr2	113157325	113209396	1	q14.1	PSD4	51.01	protein_coding	13442
0.0083618	0.281	427.38	532.52	411.49	226010_at	(3, 2)	ENSG00000125648	solute carrier family 25 member 23 [Source:HGNC Symbol;Acc:HGNC:19375]	chr19	6436079	6465203	-1	p13.3	SLC25A23	52.6	protein_coding	4881
7.4e-05	0.0572	209.49	400.56	291.7	202354_s_at	(1, 2), (3, 2)	ENSG00000125651	general transcription factor IIF subunit 1 [Source:HGNC Symbol;Acc:HGNC:4652]	chr19	6379572	6393981	-1	p13.3	GTF2F1	54.75	protein_coding	2876
6.56e-05	0.0569	553.42	900.39	665.92	227878_s_at	(1, 2), (3, 2)	ENSG00000125652	alkB homolog 7 [Source:HGNC Symbol;Acc:HGNC:21306]	chr19	6372794	6375250	1	p13.3	ALKBH7	65.36	protein_coding	1093
1.03e-05	0.0569	688.85	1361.05	894.22	223318_s_at	(1, 2), (3, 2)	ENSG00000125652	alkB homolog 7 [Source:HGNC Symbol;Acc:HGNC:21306]	chr19	6372794	6375250	1	p13.3	ALKBH7	65.36	protein_coding	1093
0.0087544	0.282	375.93	603.71	518.45	202205_at	(1, 2)	ENSG00000125753	vasodilator stimulated phosphoprotein [Source:HGNC Symbol;Acc:HGNC:12652]	chr19	45506579	45526983	1	q13.32	VASP	54.67	protein_coding	3538
0.0043187	0.22	242.18	358.08	308.08	212437_at	(1, 2)	ENSG00000125817	centromere protein B [Source:HGNC Symbol;Acc:HGNC:1852]	chr20	3783851	3786740	-1	p13	CENPB	66.51	protein_coding	2890
5.19e-05	0.0569	145.68	301.22	205.88	213490_s_at	(1, 2), (3, 2)	ENSG00000126934	mitogen-activated protein kinase kinase 2 [Source:HGNC Symbol;Acc:HGNC:6842]	chr19	4090321	4124122	-1	p13.3	MAP2K2	57.41	protein_coding	5229
0.0024802	0.189	1040	1462.83	1128.91	202424_at	(1, 2), (3, 2)	ENSG00000126934	mitogen-activated protein kinase kinase 2 [Source:HGNC Symbol;Acc:HGNC:6842]	chr19	4090321	4124122	-1	p13.3	MAP2K2	57.41	protein_coding	5229
0.0049855	0.238	685.06	402.81	515.89	218694_at	(2, 1)	ENSG00000126947	armadillo repeat containing X-linked 1 [Source:HGNC Symbol;Acc:HGNC:18073]	chrX	101550547	101554700	1	q22.1	ARMCX1	48.89	protein_coding	2125
0.0028753	0.194	74.42	124.59	93.59	205057_s_at	(1, 2)	ENSG00000127415	alpha-L-iduronidase [Source:HGNC Symbol;Acc:HGNC:5391]	chr4	986997	1004564	1	p16.3	IDUA	65.37	protein_coding	4058
0.00461	0.226	79.12	123.38	94.45	223648_s_at	(1, 2)	ENSG00000127418	fibroblast growth factor receptor like 1 [Source:HGNC Symbol;Acc:HGNC:3693]	chr4	1009936	1026898	1	p16.3	FGFRL1	66.73	protein_coding	4342
0.0099399	0.287	363.19	506.87	413.9	212492_s_at	(1, 2)	ENSG00000127663	lysine demethylase 4B [Source:HGNC Symbol;Acc:HGNC:29136]	chr19	4969113	5153598	1	p13.3	KDM4B	57.26	protein_coding	14719
0.0040664	0.214	685.67	421.58	689.74	212364_at	(2, 3)	ENSG00000128641	myosin IB [Source:HGNC Symbol;Acc:HGNC:7596]	chr2	191245185	191425389	1	q32.3	MYO1B	39.67	protein_coding	9533
0.0043683	0.221	105.22	72.86	77.21	206669_at	(2, 1), (3, 1)	ENSG00000128683	glutamate decarboxylase 1 [Source:HGNC Symbol;Acc:HGNC:4092]	chr2	170813213	170861151	1	q31.1	GAD1	45.82	protein_coding	8242
6.22e-05	0.0569	120.44	494.47	271.77	205363_at	(1, 2), (1, 3)	ENSG00000129151	gamma-butyrobetaine hydroxylase 1 [Source:HGNC Symbol;Acc:HGNC:964]	chr11	27040725	27127809	1	p14.2	BBOX1	37.38	protein_coding	2464
0.0065065	0.257	495.24	783.63	610.14	209208_at	(1, 2)	ENSG00000129255	mannose-P-dolichol utilization defect 1 [Source:HGNC Symbol;Acc:HGNC:7207]	chr17	7583529	7592789	1	p13.1	MPDU1	56.21	protein_coding	3290
0.0014221	0.169	164.55	314.11	288.93	208930_s_at	(1, 2), (1, 3)	ENSG00000129351	interleukin enhancer binding factor 3 [Source:HGNC Symbol;Acc:HGNC:6038]	chr19	10654261	10692417	1	p13.2	ILF3	50.9	protein_coding	11022
0.0042482	0.22	540.61	847.31	678.68	221267_s_at	(1, 2)	ENSG00000129968	abhydrolase domain containing 17A, depalmitoylase [Source:HGNC Symbol;Acc:HGNC:28756]	chr19	1876810	1885496	-1	p13.3	ABHD17A	65.1	protein_coding	6163
0.0008966	0.149	111.25	186.67	138.13	219360_s_at	(1, 2), (3, 2)	ENSG00000130529	transient receptor potential cation channel subfamily M member 4 [Source:HGNC Symbol;Acc:HGNC:17993]	chr19	49157741	49211836	1	q13.33	TRPM4	50.3	protein_coding	6604
0.0005338	0.134	218.61	350.68	277.04	202476_s_at	(1, 2)	ENSG00000130640	tubulin gamma complex associated protein 2 [Source:HGNC Symbol;Acc:HGNC:18599]	chr10	133278635	133318823	-1	q26.3	TUBGCP2	55.7	protein_coding	14147
0.0058735	0.25	172.37	251.07	231.09	223142_s_at	(1, 2)	ENSG00000130717	uridine-cytidine kinase 1 [Source:HGNC Symbol;Acc:HGNC:14859]	chr9	131523801	131531264	-1	q34.13	UCK1	57.26	protein_coding	2684
0.0007242	0.141	595.9	1039.55	780.46	203109_at	(1, 2)	ENSG00000130725	ubiquitin conjugating enzyme E2 M [Source:HGNC Symbol;Acc:HGNC:12491]	chr19	58555712	58558954	-1	q13.43	UBE2M	61.64	protein_coding	1743
0.0064383	0.256	382.42	316.79	518.75	210785_s_at	(2, 3)	ENSG00000130775	thymocyte selection associated family member 2 [Source:HGNC Symbol;Acc:HGNC:16839]	chr1	27872543	27886685	1	p35.3	THEMIS2	54.04	protein_coding	4621
0.0098249	0.286	369.93	292.52	470.42	207571_x_at	(2, 3)	ENSG00000130775	thymocyte selection associated family member 2 [Source:HGNC Symbol;Acc:HGNC:16839]	chr1	27872543	27886685	1	p35.3	THEMIS2	54.04	protein_coding	4621
0.0031063	0.202	280.52	436.51	342.82	218215_s_at	(1, 2)	ENSG00000131408	nuclear receptor subfamily 1 group H member 2 [Source:HGNC Symbol;Acc:HGNC:7965]	chr19	50329653	50383388	1	q13.33	NR1H2	51.29	protein_coding	5341
0.0045643	0.225	1346.3	928.84	1228.28	203044_at	(2, 1), (2, 3)	ENSG00000131873	chondroitin sulfate synthase 1 [Source:HGNC Symbol;Acc:HGNC:17198]	chr15	101175727	101252048	-1	q26.3	CHSY1	43.4	protein_coding	5667
0.0027579	0.194	381.28	393.2	264.66	204142_at	(3, 2)	ENSG00000132199	enolase superfamily member 1 [Source:HGNC Symbol;Acc:HGNC:30365]	chr18	670318	712662	-1	p11.32	ENOSF1	46.09	protein_coding	11390
0.0069522	0.265	544.72	587.21	412.33	204143_s_at	(3, 2)	ENSG00000132199	enolase superfamily member 1 [Source:HGNC Symbol;Acc:HGNC:30365]	chr18	670318	712662	-1	p11.32	ENOSF1	46.09	protein_coding	11390
0.0006873	0.141	138.58	324.06	198.93	204989_s_at	(1, 2), (3, 2)	ENSG00000132470	integrin subunit beta 4 [Source:HGNC Symbol;Acc:HGNC:6158]	chr17	75721328	75757818	1	q25.1	ITGB4	57.98	protein_coding	6761
0.0092089	0.284	488.72	943.03	659.34	204990_s_at	(1, 2)	ENSG00000132470	integrin subunit beta 4 [Source:HGNC Symbol;Acc:HGNC:6158]	chr17	75721328	75757818	1	q25.1	ITGB4	57.98	protein_coding	6761
0.0087977	0.282	99.12	149.4	118.89	211299_s_at	(1, 2)	ENSG00000132589	flotillin 2 [Source:HGNC Symbol;Acc:HGNC:3758]	chr17	28879335	28897733	-1	q11.2	FLOT2	54.43	protein_coding	3390
6.29e-05	0.0569	348.24	651.5	509.38	207722_s_at	(1, 2), (1, 3)	ENSG00000133243	BTB domain containing 2 [Source:HGNC Symbol;Acc:HGNC:15504]	chr19	1985438	2034881	-1	p13.3	BTBD2	55.3	protein_coding	5934
0.0068349	0.264	70.18	118.82	102.1	231299_at	(1, 2)	ENSG00000133612	ArfGAP with GTPase domain, ankyrin repeat and PH domain 3 [Source:HGNC Symbol;Acc:HGNC:16923]	chr7	151085831	151144436	1	q36.1	AGAP3	57.73	protein_coding	11299
0.0093033	0.284	891.07	421.3	569.17	202554_s_at	(2, 1)	ENSG00000134202	glutathione S-transferase mu 3 [Source:HGNC Symbol;Acc:HGNC:4635]	chr1	109733932	109741038	-1	p13.3	GSTM3	47.16	protein_coding	4750
0.0051367	0.24	389.25	437.82	317	225448_at	(3, 2)	ENSG00000134265	NSF attachment protein gamma [Source:HGNC Symbol;Acc:HGNC:7642]	chr18	10525905	10552764	1	p11.22	NAPG	39.33	protein_coding	5589
0.0056118	0.246	302.07	243.43	200.01	210048_at	(3, 1)	ENSG00000134265	NSF attachment protein gamma [Source:HGNC Symbol;Acc:HGNC:7642]	chr18	10525905	10552764	1	p11.22	NAPG	39.33	protein_coding	5589
0.0023371	0.185	1064.82	798.89	1094.73	212163_at	(2, 3)	ENSG00000134313	kinase D interacting substrate 220 [Source:HGNC Symbol;Acc:HGNC:29508]	chr2	8721081	8837630	-1	p25.1	KIDINS220	38.39	protein_coding	15361
0.0026366	0.192	75.11	127.41	105.26	222508_s_at	(1, 2)	ENSG00000134884	arginine and glutamate rich 1 [Source:HGNC Symbol;Acc:HGNC:25482]	chr13	106541673	106568137	-1	q33.3	ARGLU1	37.63	protein_coding	5783
0.0028795	0.194	380.93	591.14	479.52	228477_at	(1, 2)	ENSG00000134884	arginine and glutamate rich 1 [Source:HGNC Symbol;Acc:HGNC:25482]	chr13	106541673	106568137	-1	q33.3	ARGLU1	37.63	protein_coding	5783
0.0042074	0.219	557.16	353.75	455.05	222989_s_at	(2, 1)	ENSG00000135018	ubiquilin 1 [Source:HGNC Symbol;Acc:HGNC:12508]	chr9	83659968	83707958	-1	q21.32	UBQLN1	38.64	protein_coding	6867
0.0050288	0.239	283.6	533.95	311.5	224189_x_at	(1, 2), (3, 2)	ENSG00000135373	ETS homologous factor [Source:HGNC Symbol;Acc:HGNC:3246]	chr11	34621093	34663288	1	p13	EHF	43.51	protein_coding	6617
0.0043443	0.22	97.49	166.05	99.99	222932_at	(3, 2)	ENSG00000135373	ETS homologous factor [Source:HGNC Symbol;Acc:HGNC:3246]	chr11	34621093	34663288	1	p13	EHF	43.51	protein_coding	6617
0.0049295	0.237	293.9	601.79	322.56	219850_s_at	(3, 2)	ENSG00000135373	ETS homologous factor [Source:HGNC Symbol;Acc:HGNC:3246]	chr11	34621093	34663288	1	p13	EHF	43.51	protein_coding	6617
0.008554	0.282	60.51	108.5	91.49	226289_at	(1, 2)	ENSG00000135387	cell cycle associated protein 1 [Source:HGNC Symbol;Acc:HGNC:6743]	chr11	34051731	34102610	1	p13	CAPRIN1	40.01	protein_coding	9095
0.0085416	0.282	524.75	359.87	426.82	212800_at	(2, 1)	ENSG00000135823	syntaxin 6 [Source:HGNC Symbol;Acc:HGNC:11441]	chr1	180972712	181023121	-1	q25.3	STX6	40.71	protein_coding	6477
0.0021414	0.179	2076.24	1272.42	1410.6	200770_s_at	(2, 1), (3, 1)	ENSG00000135862	laminin subunit gamma 1 [Source:HGNC Symbol;Acc:HGNC:6492]	chr1	183023420	183145592	1	q25.3	LAMC1	40.09	protein_coding	8446
0.0015152	0.169	2035.25	892.38	1470.28	221004_s_at	(2, 1), (2, 3)	ENSG00000135916	integral membrane protein 2C [Source:HGNC Symbol;Acc:HGNC:6175]	chr2	230864639	230879248	1	q37.1	ITM2C	58.43	protein_coding	2569
0.0079252	0.275	1240.83	915.55	1059.68	213571_s_at	(2, 1)	ENSG00000135930	eukaryotic translation initiation factor 4E family member 2 [Source:HGNC Symbol;Acc:HGNC:3293]	chr2	232550674	232583644	1	q37.1	EIF4E2	44.15	protein_coding	6555
0.0089836	0.282	40.6	50.9	58.94	214723_x_at	(1, 3)	ENSG00000135976	ankyrin repeat domain 36 [Source:HGNC Symbol;Acc:HGNC:24079]	chr2	97113153	97264521	1	q11.2	ANKRD36	36	protein_coding	11284
0.00209	0.179	2427.62	1459.08	1683.73	200999_s_at	(2, 1), (3, 1)	ENSG00000136026	cytoskeleton associated protein 4 [Source:HGNC Symbol;Acc:HGNC:16991]	chr12	106237881	106304279	-1	q23.3	CKAP4	44.3	protein_coding	3666
0.0026178	0.192	252.24	452.06	381.45	242722_at	(1, 2)	ENSG00000136153	LIM domain 7 [Source:HGNC Symbol;Acc:HGNC:6646]	chr13	75620434	75859870	1	q22.2	LMO7	38.67	protein_coding	14367
4.13e-05	0.0569	103.07	197.79	151.15	221551_x_at	(1, 2), (1, 3)	ENSG00000136840	ST6 N-acetylgalactosaminide alpha-2,6-sialyltransferase 4 [Source:HGNC Symbol;Acc:HGNC:17846]	chr9	127907886	127917041	-1	q34.11	ST6GALNAC4	56.64	protein_coding	2633
3.95e-05	0.0569	108.04	185.69	157.31	223285_s_at	(1, 2), (1, 3)	ENSG00000136840	ST6 N-acetylgalactosaminide alpha-2,6-sialyltransferase 4 [Source:HGNC Symbol;Acc:HGNC:17846]	chr9	127907886	127917041	-1	q34.11	ST6GALNAC4	56.64	protein_coding	2633
9.35e-05	0.0688	144.68	285.26	215.9	220937_s_at	(1, 2), (1, 3)	ENSG00000136840	ST6 N-acetylgalactosaminide alpha-2,6-sialyltransferase 4 [Source:HGNC Symbol;Acc:HGNC:17846]	chr9	127907886	127917041	-1	q34.11	ST6GALNAC4	56.64	protein_coding	2633
0.0020808	0.179	72.54	90.53	66.28	1568997_at	(3, 2)	ENSG00000137054	RNA polymerase I subunit E [Source:HGNC Symbol;Acc:HGNC:17631]	chr9	37485948	37503697	1	p13.2	POLR1E	46.26	protein_coding	2499
0.0016232	0.169	585.62	390.14	468.49	218816_at	(2, 1)	ENSG00000137269	leucine rich repeat containing 1 [Source:HGNC Symbol;Acc:HGNC:14307]	chr6	53794497	53924125	1	p12.1	LRRC1	39.72	protein_coding	4901
0.0009002	0.149	204.94	124.89	151.43	206377_at	(2, 1)	ENSG00000137273	forkhead box F2 [Source:HGNC Symbol;Acc:HGNC:3810]	chr6	1389576	1395603	1	p25.3	FOXF2	60.68	protein_coding	2451
0.0068201	0.264	189.33	275.45	216.85	210457_x_at	(1, 2)	ENSG00000137309	high mobility group AT-hook 1 [Source:HGNC Symbol;Acc:HGNC:5010]	chr6	34236873	34246231	1	p21.31	HMGA1	57.83	protein_coding	2327
0.0039216	0.214	57.23	95.55	82.64	214250_at	(1, 2)	ENSG00000137497	nuclear mitotic apparatus protein 1 [Source:HGNC Symbol;Acc:HGNC:8059]	chr11	72002864	72080693	-1	q13.4	NUMA1	46.62	protein_coding	15224
0.0061762	0.255	211.18	299.85	301.54	238346_s_at	(1, 2), (1, 3)	ENSG00000137574	trimethylguanosine synthase 1 [Source:HGNC Symbol;Acc:HGNC:17843]	chr8	55773446	55826445	1	q12.1	TGS1	39.78	protein_coding	4562
0.0040511	0.214	272.54	415.87	360.33	217289_s_at	(1, 2)	ENSG00000137700	solute carrier family 37 member 4 [Source:HGNC Symbol;Acc:HGNC:4061]	chr11	119024114	119030906	-1	q23.3	SLC37A4	55.91	protein_coding	6186
0.0083578	0.281	195.61	121.61	114.55	242871_at	(2, 1), (3, 1)	ENSG00000137819	progestin and adipoQ receptor family member 5 [Source:HGNC Symbol;Acc:HGNC:29645]	chr15	69298912	69407780	1	q23	PAQR5	46.87	protein_coding	6259
0.0046323	0.226	389.76	233.62	333.05	1555274_a_at	(2, 1), (2, 3)	ENSG00000138018	selenoprotein I [Source:HGNC Symbol;Acc:HGNC:29361]	chr2	26308547	26395891	1	p23.3	SELENOI	42.63	protein_coding	8552
0.0024124	0.186	1006.11	673.31	882.22	202770_s_at	(2, 1), (2, 3)	ENSG00000138764	cyclin G2 [Source:HGNC Symbol;Acc:HGNC:1593]	chr4	77157207	77433388	1	q21.1	CCNG2	43.18	protein_coding	7416
0.001827	0.174	110.31	185.54	158.18	239364_at	(1, 2), (1, 3)	ENSG00000139083	ETS variant transcription factor 6 [Source:HGNC Symbol;Acc:HGNC:3495]	chr12	11649674	11895377	1	p13.2	ETV6	43.2	protein_coding	7230
0.0047228	0.229	154.67	92.91	95.2	1552306_at	(2, 1), (3, 1)	ENSG00000139133	ALG10 alpha-1,2-glucosyltransferase [Source:HGNC Symbol;Acc:HGNC:23162]	chr12	34022468	34029694	1	p11.1	ALG10	35.91	protein_coding	4202
0.0062958	0.255	459.03	274.98	274.6	228303_at	(2, 1), (3, 1)	ENSG00000139629	polypeptide N-acetylgalactosaminyltransferase 6 [Source:HGNC Symbol;Acc:HGNC:4128]	chr12	51351247	51392867	-1	q13.13	GALNT6	49.89	protein_coding	7347
0.0039199	0.214	88.28	117.97	87.37	232466_at	(3, 2)	ENSG00000139842	cullin 4A [Source:HGNC Symbol;Acc:HGNC:2554]	chr13	113208193	113267108	1	q34	CUL4A	45.97	protein_coding	7813
0.001653	0.169	126.08	196.18	168.28	210362_x_at	(1, 2)	ENSG00000140464	PML nuclear body scaffold [Source:HGNC Symbol;Acc:HGNC:9113]	chr15	73994673	74047827	1	q24.1	PML	47.81	protein_coding	12672
0.0007453	0.141	56.93	110.04	75.45	241755_at	(1, 2), (3, 2)	ENSG00000140740	ubiquinol-cytochrome c reductase core protein 2 [Source:HGNC Symbol;Acc:HGNC:12586]	chr16	21953288	21983660	1	p12.2	UQCRC2	40.09	protein_coding	4589
0.0082181	0.281	96.09	54.24	54.82	237206_at	(2, 1), (3, 1)	ENSG00000141052	myocardin [Source:HGNC Symbol;Acc:HGNC:16067]	chr17	12665890	12768949	1	p12	MYOCD	41.77	protein_coding	8875
0.0004497	0.132	720.06	1625.31	1292.54	228834_at	(1, 2), (1, 3)	ENSG00000141232	transducer of ERBB2, 1 [Source:HGNC Symbol;Acc:HGNC:11979]	chr17	50862223	50867978	-1	q21.33	TOB1	50.17	protein_coding	2521
0.0088816	0.282	2695.77	2717.38	2166.91	1557820_at	(3, 2)	ENSG00000141385	AFG3 like matrix AAA peptidase subunit 2 [Source:HGNC Symbol;Acc:HGNC:315]	chr18	12328944	12377227	-1	p11.21	AFG3L2	44.64	protein_coding	6708
0.0051563	0.24	237.14	357.72	312.67	214958_s_at	(1, 2)	ENSG00000141524	transmembrane channel like 6 [Source:HGNC Symbol;Acc:HGNC:18021]	chr17	78107397	78132407	-1	q25.3	TMC6	60.67	protein_coding	11730
0.0001041	0.0732	194.03	369.51	301.23	229192_s_at	(1, 2), (1, 3)	ENSG00000141556	tubulin folding cofactor D [Source:HGNC Symbol;Acc:HGNC:11581]	chr17	82752042	82945914	1	q25.3	TBCD	52.85	protein_coding	23081
0.0014747	0.169	72.85	128.02	102.08	1555611_s_at	(1, 2)	ENSG00000141644	methyl-CpG binding domain protein 1 [Source:HGNC Symbol;Acc:HGNC:6916]	chr18	50266882	50281774	-1	q21.1	MBD1	49.32	protein_coding	6734
0.0028273	0.194	436.83	241.19	368.97	214933_at	(2, 1), (2, 3)	ENSG00000141837	calcium voltage-gated channel subunit alpha1 A [Source:HGNC Symbol;Acc:HGNC:1388]	chr19	13206442	13633025	-1	p13.13	CACNA1A	47.43	protein_coding	43150
0.0079552	0.275	476.64	710.19	556.63	226377_at	(1, 2)	ENSG00000141905	nuclear factor I C [Source:HGNC Symbol;Acc:HGNC:7786]	chr19	3314403	3469217	1	p13.3	NFIC	55.09	protein_coding	9801
2.95e-05	0.0569	447.22	821.2	645.96	201102_s_at	(1, 2), (1, 3)	ENSG00000141959	phosphofructokinase, liver type [Source:HGNC Symbol;Acc:HGNC:8876]	chr21	44300051	44327376	1	q22.3	PFKL	63.48	protein_coding	8926
0.0045661	0.225	185.23	257.95	216.02	228129_at	(1, 2)	ENSG00000142864	SERPINE1 mRNA binding protein 1 [Source:HGNC Symbol;Acc:HGNC:17860]	chr1	67407810	67430415	-1	p31.3	SERBP1	38.87	protein_coding	7676
0.009349	0.285	118.14	153.1	106	227155_at	(3, 2)	ENSG00000143013	LIM domain only 4 [Source:HGNC Symbol;Acc:HGNC:6644]	chr1	87328880	87348923	1	p22.3	LMO4	41.87	protein_coding	5421
0.002664	0.192	228.87	94.03	142.83	235944_at	(2, 1)	ENSG00000143341	hemicentin 1 [Source:HGNC Symbol;Acc:HGNC:19194]	chr1	185734391	186190949	1	q25.3	HMCN1	35.99	protein_coding	18739
0.0083899	0.281	198.14	240.92	175.44	210085_s_at	(3, 2)	ENSG00000143412	annexin A9 [Source:HGNC Symbol;Acc:HGNC:547]	chr1	150982249	150995634	1	q21.3	ANXA9	49.76	protein_coding	1594
0.0088074	0.282	130.43	177.21	114.2	211712_s_at	(3, 2)	ENSG00000143412	annexin A9 [Source:HGNC Symbol;Acc:HGNC:547]	chr1	150982249	150995634	1	q21.3	ANXA9	49.76	protein_coding	1594
0.0011243	0.16	199.15	354.41	237.65	228851_s_at	(1, 2), (3, 2)	ENSG00000143420	endosulfine alpha [Source:HGNC Symbol;Acc:HGNC:3360]	chr1	150600851	150629612	-1	q21.3	ENSA	45.32	protein_coding	4619
0.0092833	0.284	84.68	50.45	90.33	235343_at	(2, 3)	ENSG00000143494	vasohibin 2 [Source:HGNC Symbol;Acc:HGNC:25723]	chr1	212950520	212992037	1	q32.3	VASH2	48.23	protein_coding	9086
0.0001989	0.0968	179.09	316.27	237.68	217007_s_at	(1, 2), (3, 2)	ENSG00000143537	ADAM metallopeptidase domain 15 [Source:HGNC Symbol;Acc:HGNC:193]	chr1	155050566	155062775	1	q21.3	ADAM15	58.25	protein_coding	6584
0.0013616	0.169	186.18	126.37	189.52	243463_s_at	(2, 3)	ENSG00000143622	Ras like without CAAX 1 [Source:HGNC Symbol;Acc:HGNC:10023]	chr1	155897808	155911404	-1	q22	RIT1	43.8	protein_coding	4038
0.0006343	0.136	439	327.33	519.56	226726_at	(2, 3)	ENSG00000143797	membrane bound O-acyltransferase domain containing 2 [Source:HGNC Symbol;Acc:HGNC:25193]	chr2	8852690	9003709	-1	p25.1	MBOAT2	40.14	protein_coding	8694
0.0040599	0.214	415.4	284.38	349.09	226251_at	(2, 1)	ENSG00000143970	ASXL transcriptional regulator 2 [Source:HGNC Symbol;Acc:HGNC:23805]	chr2	25733753	25878487	-1	p23.3	ASXL2	39.52	protein_coding	13238
0.0002004	0.0968	180.83	73.67	68.98	232327_at	(2, 1), (3, 1)	ENSG00000144229	thrombospondin type 1 domain containing 7B [Source:HGNC Symbol;Acc:HGNC:29348]	chr2	136765545	137677718	1	q22.1	THSD7B	37.67	protein_coding	6762
0.0014846	0.169	390.44	226.94	281.8	235177_at	(2, 1)	ENSG00000144401	methyltransferase like 21A [Source:HGNC Symbol;Acc:HGNC:30476]	chr2	207580631	207625928	-1	q33.3	METTL21A	40.9	protein_coding	6798
0.0056679	0.247	156.3	105.11	113.51	215046_at	(2, 1), (3, 1)	ENSG00000144445	KAT8 regulatory NSL complex subunit 1 like [Source:HGNC Symbol;Acc:HGNC:26310]	chr2	210021421	210171409	-1	q34	KANSL1L	36.36	protein_coding	8519
0.0039269	0.214	555.19	314.71	450.29	204944_at	(2, 1)	ENSG00000144724	protein tyrosine phosphatase receptor type G [Source:HGNC Symbol;Acc:HGNC:9671]	chr3	61561569	62297609	1	p14.2	PTPRG	40.79	protein_coding	14625
0.0058796	0.25	1039.04	1467.69	1095.44	201737_s_at	(3, 2)	ENSG00000145495	membrane associated ring-CH-type finger 6 [Source:HGNC Symbol;Acc:HGNC:30550]	chr5	10353695	10440388	1	p15.2	MARCHF6	39.32	protein_coding	11344
0.0065582	0.258	85.78	153.19	111.57	212249_at	(1, 2)	ENSG00000145675	phosphoinositide-3-kinase regulatory subunit 1 [Source:HGNC Symbol;Acc:HGNC:8979]	chr5	68215756	68301821	1	q13.1	PIK3R1	39.2	protein_coding	10731
0.0083961	0.281	162.99	113.11	165.74	203474_at	(2, 3)	ENSG00000145703	IQ motif containing GTPase activating protein 2 [Source:HGNC Symbol;Acc:HGNC:6111]	chr5	76403285	76708132	1	q13.3	IQGAP2	40.46	protein_coding	7868
0.0015917	0.169	73.7	127.01	97.88	242422_at	(1, 2)	ENSG00000145907	G3BP stress granule assembly factor 1 [Source:HGNC Symbol;Acc:HGNC:30292]	chr5	151771045	151812911	1	q33.1	G3BP1	39.46	protein_coding	20038
0.0013603	0.169	70.1	111.48	89.4	223994_s_at	(1, 2)	ENSG00000146828	solute carrier family 12 member 9 [Source:HGNC Symbol;Acc:HGNC:17435]	chr7	100826820	100867010	1	q22.1	SLC12A9	51.93	protein_coding	8901
0.001048	0.16	333.39	484.83	385.81	1559822_s_at	(1, 2), (3, 2)	ENSG00000147649	metadherin [Source:HGNC Symbol;Acc:HGNC:29608]	chr8	97644184	97730260	1	q22.1	MTDH	40.61	protein_coding	7876
0.0033223	0.204	320.92	522.58	418.22	227277_at	(1, 2)	ENSG00000147649	metadherin [Source:HGNC Symbol;Acc:HGNC:29608]	chr8	97644184	97730260	1	q22.1	MTDH	40.61	protein_coding	7876
0.0070953	0.266	2041.69	2521.16	1890.92	224655_at	(3, 2)	ENSG00000147853	adenylate kinase 3 [Source:HGNC Symbol;Acc:HGNC:17376]	chr9	4709556	4742043	-1	p24.1	AK3	41.46	protein_coding	4395
0.0013485	0.169	199.52	447.02	302.7	214040_s_at	(1, 2)	ENSG00000148180	gelsolin [Source:HGNC Symbol;Acc:HGNC:4620]	chr9	121207794	121332843	1	q33.2	GSN	46.87	protein_coding	11018
0.0017241	0.172	268.31	412.82	330.49	224907_s_at	(1, 2)	ENSG00000148341	SH3 domain containing GRB2 like, endophilin B2 [Source:HGNC Symbol;Acc:HGNC:10834]	chr9	129007036	129028331	-1	q34.11	SH3GLB2	55.79	protein_coding	6842
0.0011166	0.16	103.14	251.12	167.62	218813_s_at	(1, 2)	ENSG00000148341	SH3 domain containing GRB2 like, endophilin B2 [Source:HGNC Symbol;Acc:HGNC:10834]	chr9	129007036	129028331	-1	q34.11	SH3GLB2	55.79	protein_coding	6842
0.002263	0.185	263.99	220.22	184.55	238164_at	(3, 1)	ENSG00000148429	USP6 N-terminal like [Source:HGNC Symbol;Acc:HGNC:16858]	chr10	11453946	11611754	-1	p14	USP6NL	38.22	protein_coding	14202
0.0014269	0.169	332.25	209.15	240.48	204761_at	(2, 1), (3, 1)	ENSG00000148429	USP6 N-terminal like [Source:HGNC Symbol;Acc:HGNC:16858]	chr10	11453946	11611754	-1	p14	USP6NL	38.22	protein_coding	14202
0.0067385	0.263	262.03	829.06	419.52	203571_s_at	(1, 2)	ENSG00000148671	adipogenesis regulatory factor [Source:HGNC Symbol;Acc:HGNC:24043]	chr10	86968432	86983934	1	q23.2	ADIRF	49.56	protein_coding	758
0.0055909	0.246	2258.73	1755.12	2321.5	212614_at	(2, 3)	ENSG00000150347	AT-rich interaction domain 5B [Source:HGNC Symbol;Acc:HGNC:17362]	chr10	61901684	62096944	1	q21.2	ARID5B	40.32	protein_coding	8760
0.0043259	0.22	114.69	173.01	139.9	212404_s_at	(1, 2)	ENSG00000151148	ubiquitin protein ligase E3B [Source:HGNC Symbol;Acc:HGNC:13478]	chr12	109477402	109536705	1	q24.11	UBE3B	46.32	protein_coding	12453
0.0023855	0.185	1975.24	1350.07	1337.83	201745_at	(2, 1), (3, 1)	ENSG00000151239	twinfilin actin binding protein 1 [Source:HGNC Symbol;Acc:HGNC:9620]	chr12	43793723	43806328	-1	q12	TWF1	33.94	protein_coding	3885
0.0065048	0.257	338.74	228.52	293.37	225731_at	(2, 1)	ENSG00000151458	ankyrin repeat domain 50 [Source:HGNC Symbol;Acc:HGNC:29223]	chr4	124664048	124712732	-1	q28.1	ANKRD50	35.15	protein_coding	8798
0.0030337	0.199	1191.25	921.68	1186.01	213532_at	(2, 3)	ENSG00000151694	ADAM metallopeptidase domain 17 [Source:HGNC Symbol;Acc:HGNC:195]	chr2	9488486	9556732	-1	p25.1	ADAM17	41.31	protein_coding	10728
0.0092701	0.284	97.52	77.27	103.13	241985_at	(2, 3)	ENSG00000152409	junction mediating and regulatory protein, p53 cofactor [Source:HGNC Symbol;Acc:HGNC:28916]	chr5	79236131	79327211	1	q14.1	JMY	40.21	protein_coding	9096
0.0019127	0.175	582.83	487.66	688.5	226352_at	(2, 3)	ENSG00000152409	junction mediating and regulatory protein, p53 cofactor [Source:HGNC Symbol;Acc:HGNC:28916]	chr5	79236131	79327211	1	q14.1	JMY	40.21	protein_coding	9096
0.008952	0.282	227.9	171.49	236.35	226651_at	(2, 3)	ENSG00000152413	homer scaffold protein 1 [Source:HGNC Symbol;Acc:HGNC:17512]	chr5	79372636	79514134	-1	q14.1	HOMER1	37.2	protein_coding	6071
0.00224	0.185	453.27	277.01	412.23	213793_s_at	(2, 1), (2, 3)	ENSG00000152413	homer scaffold protein 1 [Source:HGNC Symbol;Acc:HGNC:17512]	chr5	79372636	79514134	-1	q14.1	HOMER1	37.2	protein_coding	6071
0.0011384	0.16	66.99	105.45	91.07	216855_s_at	(1, 2), (1, 3)	ENSG00000153187	heterogeneous nuclear ribonucleoprotein U [Source:HGNC Symbol;Acc:HGNC:5048]	chr1	244840638	244864560	-1	q44	HNRNPU	38.67	protein_coding	22512
0.0084969	0.282	229.21	157.48	243.13	225238_at	(2, 3)	ENSG00000153944	musashi RNA binding protein 2 [Source:HGNC Symbol;Acc:HGNC:18585]	chr17	57255851	57684689	1	q22	MSI2	47.5	protein_coding	22248
0.0014106	0.169	88.99	130.13	110.64	213747_at	(1, 2)	ENSG00000155096	antizyme inhibitor 1 [Source:HGNC Symbol;Acc:HGNC:16432]	chr8	102826111	102893864	-1	q22.3	AZIN1	40.79	protein_coding	6130
0.0087248	0.282	87.35	129.48	106.4	202873_at	(1, 2)	ENSG00000155097	ATPase H+ transporting V1 subunit C1 [Source:HGNC Symbol;Acc:HGNC:856]	chr8	103021063	103073051	1	q22.3	ATP6V1C1	38.39	protein_coding	5851
2.65e-05	0.0569	96.98	153.49	120.28	1555282_a_at	(1, 2), (3, 2)	ENSG00000155846	PPARG coactivator 1 beta [Source:HGNC Symbol;Acc:HGNC:30022]	chr5	149730298	149855022	1	q32	PPARGC1B	49	protein_coding	12889
0.0019712	0.177	171.87	82.1	112.1	203355_s_at	(2, 1)	ENSG00000156011	pleckstrin and Sec7 domain containing 3 [Source:HGNC Symbol;Acc:HGNC:19093]	chr8	18527303	19084730	-1	p22	PSD3	39.94	protein_coding	15228
0.0023778	0.185	245.8	151.31	192.69	218613_at	(2, 1)	ENSG00000156011	pleckstrin and Sec7 domain containing 3 [Source:HGNC Symbol;Acc:HGNC:19093]	chr8	18527303	19084730	-1	p22	PSD3	39.94	protein_coding	15228
0.0039494	0.214	458.57	707.32	549.58	209065_at	(1, 2)	ENSG00000156467	ubiquinol-cytochrome c reductase binding protein [Source:HGNC Symbol;Acc:HGNC:12582]	chr8	96222947	96235546	-1	q22.1	UQCRB	38.71	protein_coding	12600
0.0005436	0.134	82.28	123.93	83.22	220585_at	(1, 2), (3, 2)	ENSG00000156510	hexokinase domain containing 1 [Source:HGNC Symbol;Acc:HGNC:23302]	chr10	69220332	69267552	1	q22.1	HKDC1	47.95	protein_coding	4223
0.003561	0.212	138.22	76.17	88.45	1555963_x_at	(2, 1), (3, 1)	ENSG00000156966	UDP-GlcNAc:betaGal beta-1,3-N-acetylglucosaminyltransferase 7 [Source:HGNC Symbol;Acc:HGNC:18811]	chr2	231395710	231401164	1	q37.1	B3GNT7	62.73	protein_coding	3639
0.0062789	0.255	349.38	217.95	236.8	1555962_at	(2, 1), (3, 1)	ENSG00000156966	UDP-GlcNAc:betaGal beta-1,3-N-acetylglucosaminyltransferase 7 [Source:HGNC Symbol;Acc:HGNC:18811]	chr2	231395710	231401164	1	q37.1	B3GNT7	62.73	protein_coding	3639
0.0089311	0.282	30.29	57.74	44.97	210057_at	(1, 2)	ENSG00000157106	SMG1 nonsense mediated mRNA decay associated PI3K related kinase [Source:HGNC Symbol;Acc:HGNC:30045]	chr16	18804860	18926408	-1	p12.3	SMG1	39.93	protein_coding	25935
0.0062166	0.255	177.77	125.34	144.93	236402_at	(2, 1)	ENSG00000157764	B-Raf proto-oncogene, serine/threonine kinase [Source:HGNC Symbol;Acc:HGNC:1097]	chr7	140719327	140924929	-1	q34	BRAF	38	protein_coding	23433
0.0005674	0.134	101.91	173.62	146.36	224563_at	(1, 2), (1, 3)	ENSG00000158195	WASP family member 2 [Source:HGNC Symbol;Acc:HGNC:12733]	chr1	27404230	27490167	-1	p36.11	WASF2	44.01	protein_coding	5681
0.0026464	0.192	1554.41	1400.24	1877.44	221484_at	(2, 3)	ENSG00000158470	beta-1,4-galactosyltransferase 5 [Source:HGNC Symbol;Acc:HGNC:928]	chr20	49632945	49713878	-1	q13.13	B4GALT5	42.32	protein_coding	4722
0.0012697	0.169	143.8	222.62	158.67	242420_at	(1, 2), (3, 2)	ENSG00000158528	protein phosphatase 1 regulatory subunit 9A [Source:HGNC Symbol;Acc:HGNC:14946]	chr7	94907202	95296415	1	q21.3	PPP1R9A	36.45	protein_coding	11194
0.0036817	0.213	407.82	197.18	281.07	204597_x_at	(2, 1)	ENSG00000159167	stanniocalcin 1 [Source:HGNC Symbol;Acc:HGNC:11373]	chr8	23841929	23854806	-1	p21.2	STC1	43.8	protein_coding	4134
0.002127	0.179	53.52	83.06	73.61	227057_at	(1, 2), (1, 3)	ENSG00000159314	Rho GTPase activating protein 27 [Source:HGNC Symbol;Acc:HGNC:31813]	chr17	45393902	45434421	-1	q21.31	ARHGAP27	54.68	protein_coding	10426
0.0095939	0.286	82.58	117.15	101.08	202046_s_at	(1, 2)	ENSG00000160007	Rho GTPase activating protein 35 [Source:HGNC Symbol;Acc:HGNC:4591]	chr19	46860997	47005077	1	q13.32	ARHGAP35	46.43	protein_coding	11646
0.0001818	0.0937	515.89	1063.51	685.24	223948_s_at	(1, 2), (3, 2)	ENSG00000160183	transmembrane serine protease 3 [Source:HGNC Symbol;Acc:HGNC:11877]	chr21	42371887	42396091	-1	q22.3	TMPRSS3	50.64	protein_coding	4908
0.005124	0.24	181.76	296.99	216.75	223182_s_at	(1, 2)	ENSG00000160216	1-acylglycerol-3-phosphate O-acyltransferase 3 [Source:HGNC Symbol;Acc:HGNC:326]	chr21	43865223	43987592	1	q22.3	AGPAT3	51.65	protein_coding	12315
0.0002157	0.101	364.31	635.33	446.91	210667_s_at	(1, 2), (3, 2)	ENSG00000160221	glutamine amidotransferase like class 1 domain containing 3A [Source:HGNC Symbol;Acc:HGNC:1273]	chr21	44133610	44210114	1	q22.3	GATD3A	56.16	protein_coding	7947
0.0070686	0.266	455.46	610.28	473.84	225467_s_at	(3, 2)	ENSG00000160439	retinol dehydrogenase 13 [Source:HGNC Symbol;Acc:HGNC:19978]	chr19	55039108	55071291	-1	q13.42	RDH13	52.13	protein_coding	8602
0.0019727	0.177	438.13	913.05	669.02	220189_s_at	(1, 2)	ENSG00000161013	alpha-1,3-mannosyl-glycoprotein 4-beta-N-acetylglucosaminyltransferase B [Source:HGNC Symbol;Acc:HGNC:7048]	chr5	179797597	179806952	-1	q35.3	MGAT4B	64.04	protein_coding	5495
0.0045142	0.224	220.98	350.6	268.63	1552476_s_at	(1, 2)	ENSG00000161714	phospholipase C delta 3 [Source:HGNC Symbol;Acc:HGNC:9061]	chr17	45108959	45133354	-1	q21.31	PLCD3	57.79	protein_coding	6748
0.0073799	0.268	77.49	126.89	98.31	214310_s_at	(1, 2)	ENSG00000162300	zinc finger protein like 1 [Source:HGNC Symbol;Acc:HGNC:12868]	chr11	65084210	65088398	1	q13.1	ZFPL1	56.22	protein_coding	3120
0.0095188	0.286	74.51	51.22	49.59	240349_at	(2, 1), (3, 1)	ENSG00000162409	protein kinase AMP-activated catalytic subunit alpha 2 [Source:HGNC Symbol;Acc:HGNC:9377]	chr1	56645314	56715335	1	p32.2	PRKAA2	36.6	protein_coding	9362
0.0006317	0.136	174.41	318.77	243.67	230630_at	(1, 2)	ENSG00000162433	adenylate kinase 4 [Source:HGNC Symbol;Acc:HGNC:363]	chr1	65147549	65232145	1	p31.3	AK4	42.62	protein_coding	7578
0.0066646	0.261	147.94	222.41	190.78	1552611_a_at	(1, 2)	ENSG00000162434	Janus kinase 1 [Source:HGNC Symbol;Acc:HGNC:6190]	chr1	64833229	65067754	-1	p31.3	JAK1	42.71	protein_coding	12620
0.0013124	0.169	149.39	248.23	208.22	1560292_a_at	(1, 2)	ENSG00000162542	transmembrane and coiled-coil domains 4 [Source:HGNC Symbol;Acc:HGNC:27393]	chr1	19682240	19799945	-1	p36.13	TMCO4	48.92	protein_coding	4027
0.0015822	0.169	36.75	57.96	46.46	1558101_at	(1, 2)	ENSG00000162599	nuclear factor I A [Source:HGNC Symbol;Acc:HGNC:7784]	chr1	60865259	61462788	1	p31.3	NFIA	40.05	protein_coding	55886
3.07e-05	0.0569	44.04	133.79	83.12	229994_at	(1, 2), (1, 3), (3, 2)	ENSG00000162599	nuclear factor I A [Source:HGNC Symbol;Acc:HGNC:7784]	chr1	60865259	61462788	1	p31.3	NFIA	40.05	protein_coding	55886
0.0074137	0.268	547.34	626.47	481.23	226019_at	(3, 2)	ENSG00000162600	OMA1 zinc metallopeptidase [Source:HGNC Symbol;Acc:HGNC:29661]	chr1	58415384	58546802	-1	p32.1	OMA1	39.98	protein_coding	3718
0.0096553	0.286	93.87	128.2	107.04	239038_at	(1, 2)	ENSG00000162642	chromosome 1 open reading frame 52 [Source:HGNC Symbol;Acc:HGNC:24871]	chr1	85249953	85259672	-1	p22.3	C1orf52	39.66	protein_coding	3420
0.0027011	0.194	171.99	107.97	143.72	218401_s_at	(2, 1), (2, 3)	ENSG00000162702	zinc finger protein 281 [Source:HGNC Symbol;Acc:HGNC:13075]	chr1	200404940	200410056	-1	q32.1	ZNF281	43.03	protein_coding	4895
0.003665	0.213	201.14	313.81	276.35	213826_s_at	(1, 2)	ENSG00000163041	H3.3 histone A [Source:HGNC Symbol;Acc:HGNC:4764]	chr1	226061851	226072019	1	q42.12	H3-3A	44.55	protein_coding	3826
0.0055335	0.244	52.19	76.52	62.6	222542_x_at	(1, 2)	ENSG00000163050	coenzyme Q8A [Source:HGNC Symbol;Acc:HGNC:16812]	chr1	226940286	226987544	1	q42.13	COQ8A	53.68	protein_coding	4736
0.0032768	0.204	165.22	94.23	136.13	238029_s_at	(2, 1), (2, 3)	ENSG00000163053	solute carrier family 16 member 14 [Source:HGNC Symbol;Acc:HGNC:26417]	chr2	230034982	230068993	-1	q36.3	SLC16A14	42.85	protein_coding	4932
0.0001808	0.0937	100.72	165.86	136.04	219717_at	(1, 2), (1, 3)	ENSG00000163257	DDB1 and CUL4 associated factor 16 [Source:HGNC Symbol;Acc:HGNC:25987]	chr4	17800655	17810758	-1	p15.31	DCAF16	39.37	protein_coding	4816
0.0069207	0.265	284.7	462.1	256.25	205316_at	(3, 2)	ENSG00000163406	solute carrier family 15 member 2 [Source:HGNC Symbol;Acc:HGNC:10921]	chr3	121894401	121944188	1	q13.33	SLC15A2	39.94	protein_coding	5984
0.0003285	0.12	29.46	14.05	14.8	1568603_at	(2, 1), (3, 1)	ENSG00000163618	calcium dependent secretion activator [Source:HGNC Symbol;Acc:HGNC:1426]	chr3	62398346	62875416	-1	p14.2	CADPS	40	protein_coding	14665
0.0007345	0.141	310.99	142.04	149.8	1568604_a_at	(2, 1), (3, 1)	ENSG00000163618	calcium dependent secretion activator [Source:HGNC Symbol;Acc:HGNC:1426]	chr3	62398346	62875416	-1	p14.2	CADPS	40	protein_coding	14665
0.0085752	0.282	408.73	680.03	479.2	224989_at	(1, 2)	ENSG00000163683	small integral membrane protein 14 [Source:HGNC Symbol;Acc:HGNC:27321]	chr4	39546336	39638902	-1	p14	SMIM14	41.4	protein_coding	6527
0.0008121	0.147	111.19	160.8	127.03	243634_at	(1, 2), (3, 2)	ENSG00000163683	small integral membrane protein 14 [Source:HGNC Symbol;Acc:HGNC:27321]	chr4	39546336	39638902	-1	p14	SMIM14	41.4	protein_coding	6527
0.0054605	0.244	373.9	556.04	597.57	228545_at	(1, 2), (1, 3)	ENSG00000163848	zinc finger protein 148 [Source:HGNC Symbol;Acc:HGNC:12933]	chr3	125225669	125375325	-1	q21.2	ZNF148	36.86	protein_coding	10437
0.0007072	0.141	189.85	288.39	242.77	215668_s_at	(1, 2)	ENSG00000164050	plexin B1 [Source:HGNC Symbol;Acc:HGNC:9103]	chr3	48403854	48430086	-1	p21.31	PLXNB1	59.81	protein_coding	9768
0.00109	0.16	570.88	976.25	777.33	215807_s_at	(1, 2)	ENSG00000164050	plexin B1 [Source:HGNC Symbol;Acc:HGNC:9103]	chr3	48403854	48430086	-1	p21.31	PLXNB1	59.81	protein_coding	9768
0.0025309	0.189	751.65	516.58	580.16	213918_s_at	(2, 1)	ENSG00000164190	NIPBL cohesin loading factor [Source:HGNC Symbol;Acc:HGNC:28862]	chr5	36876769	37066413	1	p13.2	NIPBL	35.04	protein_coding	12519
0.0063154	0.255	548.55	427.8	380.78	203629_s_at	(3, 1)	ENSG00000164597	component of oligomeric golgi complex 5 [Source:HGNC Symbol;Acc:HGNC:14857]	chr7	107201372	107564261	-1	q22.3	COG5	37.09	protein_coding	8397
0.0037827	0.214	1389.57	902.09	1005.17	208950_s_at	(2, 1), (3, 1)	ENSG00000164904	aldehyde dehydrogenase 7 family member A1 [Source:HGNC Symbol;Acc:HGNC:877]	chr5	126531200	126595362	-1	q23.2	ALDH7A1	43.04	protein_coding	17914
0.0089943	0.282	210.52	292.16	247.46	214848_at	(1, 2)	ENSG00000164924	tyrosine 3-monooxygenase/tryptophan 5-monooxygenase activation protein zeta [Source:HGNC Symbol;Acc:HGNC:12855]	chr8	100916523	100953388	-1	q22.3	YWHAZ	40.87	protein_coding	8557
0.0022624	0.185	613.94	245.6	312.35	212224_at	(2, 1), (3, 1)	ENSG00000165092	aldehyde dehydrogenase 1 family member A1 [Source:HGNC Symbol;Acc:HGNC:402]	chr9	72900671	73080442	-1	q21.13	ALDH1A1	36.05	protein_coding	2840
0.0037896	0.214	815.4	2140.81	1780.18	203953_s_at	(1, 2), (1, 3)	ENSG00000165215	claudin 3 [Source:HGNC Symbol;Acc:HGNC:2045]	chr7	73768997	73770270	-1	q11.23	CLDN3	69.15	protein_coding	1274
0.007937	0.275	595.73	423.1	486	221547_at	(2, 1)	ENSG00000165630	pre-mRNA processing factor 18 [Source:HGNC Symbol;Acc:HGNC:17351]	chr10	13586939	13630859	1	p13	PRPF18	38.95	protein_coding	1844
0.0033089	0.204	51.66	80.79	72.61	228684_at	(1, 2), (1, 3)	ENSG00000165655	zinc finger protein 503 [Source:HGNC Symbol;Acc:HGNC:23589]	chr10	75397830	75401764	-1	q22.2	ZNF503	61.14	protein_coding	3205
0.000739	0.141	125.73	212.09	186.94	230058_at	(1, 2), (1, 3)	ENSG00000165689	endosome associated trafficking regulator 1 [Source:HGNC Symbol;Acc:HGNC:10667]	chr9	136401922	136410614	-1	q34.3	ENTR1	56.53	protein_coding	3138
0.0015449	0.169	170.09	102.92	120	236249_at	(2, 1), (3, 1)	ENSG00000166130	IKBKB interacting protein [Source:HGNC Symbol;Acc:HGNC:26430]	chr12	98613405	98645113	-1	q23.1	IKBIP	40.95	protein_coding	4163
0.0078353	0.274	719.59	423.39	644.39	236565_s_at	(2, 1), (2, 3)	ENSG00000166173	La ribonucleoprotein 6, translational regulator [Source:HGNC Symbol;Acc:HGNC:24012]	chr15	70829130	70854157	-1	q23	LARP6	44.62	protein_coding	5552
0.007204	0.267	267.68	329.55	419.79	228381_at	(1, 3)	ENSG00000166669	activating transcription factor 7 interacting protein 2 [Source:HGNC Symbol;Acc:HGNC:20397]	chr16	10326434	10483638	1	p13.2	ATF7IP2	41.4	protein_coding	6391
0.002415	0.186	33.39	20.56	21.57	241436_at	(2, 1), (3, 1)	ENSG00000166828	sodium channel epithelial 1 subunit gamma [Source:HGNC Symbol;Acc:HGNC:10602]	chr16	23182745	23216883	1	p12.2	SCNN1G	47.5	protein_coding	3477
0.0097515	0.286	83.63	108.26	87.59	1554501_at	(3, 2)	ENSG00000166925	TSC22 domain family member 4 [Source:HGNC Symbol;Acc:HGNC:21696]	chr7	100463359	100479232	-1	q22.1	TSC22D4	58	protein_coding	3668
0.0016998	0.172	84.91	142.79	105.93	209832_s_at	(1, 2)	ENSG00000167513	chromatin licensing and DNA replication factor 1 [Source:HGNC Symbol;Acc:HGNC:24576]	chr16	88803789	88809258	1	q24.3	CDT1	65.3	protein_coding	2760
0.0008802	0.149	1026.61	1560.96	1035.83	226403_at	(1, 2), (3, 2)	ENSG00000167608	transmembrane channel like 4 [Source:HGNC Symbol;Acc:HGNC:22998]	chr19	54160108	54173250	-1	q13.42	TMC4	56.1	protein_coding	3062
0.0033231	0.204	342.21	472.59	357.47	224673_at	(1, 2), (3, 2)	ENSG00000167615	leukocyte receptor cluster member 8 [Source:HGNC Symbol;Acc:HGNC:15500]	chr19	54448887	54462016	1	q13.42	LENG8	58.96	protein_coding	6448
0.0058143	0.25	222.94	350.35	288.69	236225_at	(1, 2)	ENSG00000167741	gamma-glutamyltransferase 6 [Source:HGNC Symbol;Acc:HGNC:26891]	chr17	4556927	4560818	-1	p13.2	GGT6	60.05	protein_coding	3161
0.00514	0.24	118.23	182.04	153.27	244593_at	(1, 2)	ENSG00000167861	HID1 domain containing [Source:HGNC Symbol;Acc:HGNC:15736]	chr17	74950742	74973166	-1	q25.1	HID1	58.03	protein_coding	6197
0.0062953	0.255	113.22	204.59	163.14	222645_s_at	(1, 2)	ENSG00000167977	potassium channel tetramerization domain containing 5 [Source:HGNC Symbol;Acc:HGNC:21423]	chr16	2682523	2709030	1	p13.3	KCTD5	59.23	protein_coding	3372
0.0027764	0.194	298.66	579.64	335.78	223842_s_at	(1, 2), (3, 2)	ENSG00000168077	scavenger receptor class A member 3 [Source:HGNC Symbol;Acc:HGNC:19000]	chr8	27633868	27676776	1	p21.1	SCARA3	50.25	protein_coding	4029
0.0031657	0.202	1164.41	790.71	1025.92	202265_at	(2, 1), (2, 3)	ENSG00000168283	BMI1 proto-oncogene, polycomb ring finger [Source:HGNC Symbol;Acc:HGNC:1066]	chr10	22321099	22331484	1	p12.2	BMI1	41.91	protein_coding	4395
0.0005732	0.134	327.44	179.33	229.93	225387_at	(2, 1)	ENSG00000168785	tetraspanin 5 [Source:HGNC Symbol;Acc:HGNC:17753]	chr4	98470367	98658611	-1	q23	TSPAN5	41.92	protein_coding	7412
0.002325	0.185	197.39	135.67	160.97	225388_at	(2, 1)	ENSG00000168785	tetraspanin 5 [Source:HGNC Symbol;Acc:HGNC:17753]	chr4	98470367	98658611	-1	q23	TSPAN5	41.92	protein_coding	7412
0.0021356	0.179	213.63	319.22	272.95	225587_at	(1, 2)	ENSG00000168936	transmembrane protein 129, E3 ubiquitin ligase [Source:HGNC Symbol;Acc:HGNC:25137]	chr4	1715952	1721358	-1	p16.3	TMEM129	62.46	protein_coding	3442
0.0053054	0.241	543.64	298.7	380.85	204686_at	(2, 1)	ENSG00000169047	insulin receptor substrate 1 [Source:HGNC Symbol;Acc:HGNC:6125]	chr2	226731312	226799820	-1	q36.3	IRS1	40.92	protein_coding	10019
0.0073392	0.268	3540.3	5566.33	4796.06	209386_at	(1, 2)	ENSG00000169908	transmembrane 4 L six family member 1 [Source:HGNC Symbol;Acc:HGNC:11853]	chr3	149369022	149377692	-1	q25.1	TM4SF1	37.6	protein_coding	3495
0.0006124	0.136	181.76	313.12	270.3	213788_s_at	(1, 2), (1, 3)	ENSG00000169925	bromodomain containing 3 [Source:HGNC Symbol;Acc:HGNC:1104]	chr9	134030305	134068535	-1	q34.2	BRD3	57.61	protein_coding	6885
0.007303	0.268	995.62	1251.76	954.92	208807_s_at	(3, 2)	ENSG00000170004	chromodomain helicase DNA binding protein 3 [Source:HGNC Symbol;Acc:HGNC:1918]	chr17	7884796	7912760	1	p13.1	CHD3	53.17	protein_coding	11016
0.0072011	0.267	342.26	245.49	265.36	203521_s_at	(2, 1)	ENSG00000171467	zinc finger protein 318 [Source:HGNC Symbol;Acc:HGNC:13578]	chr6	43307134	43369647	-1	p21.1	ZNF318	43.02	protein_coding	9728
0.0025824	0.192	1110.13	678.81	772.52	225837_at	(2, 1), (3, 1)	ENSG00000171792	RAD9-HUS1-RAD1 interacting nuclear orphan 1 [Source:HGNC Symbol;Acc:HGNC:28206]	chr12	2876258	2889524	1	p13.33	RHNO1	47.54	protein_coding	2644
3.72e-05	0.0569	16.56	33.76	22.88	244546_at	(1, 2), (3, 2)	ENSG00000172115	cytochrome c, somatic [Source:HGNC Symbol;Acc:HGNC:19986]	chr7	25118656	25125260	-1	p15.3	CYCS	42.41	protein_coding	5791
0.0037702	0.214	150.75	225.1	181.62	229415_at	(1, 2)	ENSG00000172115	cytochrome c, somatic [Source:HGNC Symbol;Acc:HGNC:19986]	chr7	25118656	25125260	-1	p15.3	CYCS	42.41	protein_coding	5791
0.009043	0.282	310.5	208.89	196.8	229893_at	(3, 1)	ENSG00000172159	FERM domain containing 3 [Source:HGNC Symbol;Acc:HGNC:24125]	chr9	83242990	83538546	-1	q21.32	FRMD3	41.56	protein_coding	6486
0.003123	0.202	545.28	1013.89	455.65	209292_at	(3, 2)	ENSG00000172201	inhibitor of DNA binding 4, HLH protein [Source:HGNC Symbol;Acc:HGNC:5363]	chr6	19837370	19842197	1	p22.3	ID4	46.71	protein_coding	3873
0.0029407	0.196	869.26	1403.94	989.24	208677_s_at	(1, 2), (3, 2)	ENSG00000172270	basigin (Ok blood group) [Source:HGNC Symbol;Acc:HGNC:1116]	chr19	571277	583494	1	p13.3	BSG	62.58	protein_coding	4418
0.0072425	0.267	753.83	1003.47	724.38	225861_at	(3, 2)	ENSG00000172366	MAPK regulated corepressor interacting protein 2 [Source:HGNC Symbol;Acc:HGNC:14142]	chr16	636817	648474	1	p13.3	MCRIP2	62.73	protein_coding	5019
0.0076052	0.271	57.31	78.09	73.12	1555450_a_at	(1, 2)	ENSG00000172766	N-alpha-acetyltransferase 16, NatA auxiliary subunit [Source:HGNC Symbol;Acc:HGNC:26164]	chr13	41311267	41377030	1	q14.11	NAA16	37.31	protein_coding	5805
0.0014258	0.169	1412.98	1116.17	1448.17	226996_at	(2, 3)	ENSG00000172954	lysocardiolipin acyltransferase 1 [Source:HGNC Symbol;Acc:HGNC:26756]	chr2	30447226	30644225	1	p23.1	LCLAT1	37.54	protein_coding	7517
0.000229	0.101	331.38	569.73	482.26	209878_s_at	(1, 2), (1, 3)	ENSG00000173039	RELA proto-oncogene, NF-kB subunit [Source:HGNC Symbol;Acc:HGNC:9955]	chr11	65653597	65663090	-1	q13.1	RELA	55.64	protein_coding	5459
0.0098212	0.286	120.86	85.47	87.33	242851_at	(2, 1), (3, 1)	ENSG00000173214	major facilitator superfamily domain containing 4B [Source:HGNC Symbol;Acc:HGNC:21053]	chr6	111259327	111445354	1	q21	MFSD4B	37.91	protein_coding	18075
0.0039446	0.214	132.18	225.38	185.01	221755_at	(1, 2)	ENSG00000173442	EH domain binding protein 1 like 1 [Source:HGNC Symbol;Acc:HGNC:30682]	chr11	65576046	65592650	1	q13.1	EHBP1L1	60.61	protein_coding	6733
0.0036315	0.213	156.95	224.85	206.48	224338_s_at	(1, 2), (1, 3)	ENSG00000173456	ring finger protein 26 [Source:HGNC Symbol;Acc:HGNC:14646]	chr11	119334527	119337309	1	q23.3	RNF26	59.18	protein_coding	2783
0.0094993	0.286	579.05	409.96	445.68	218092_s_at	(2, 1)	ENSG00000173744	ArfGAP with FG repeats 1 [Source:HGNC Symbol;Acc:HGNC:5175]	chr2	227472152	227561217	1	q36.3	AGFG1	37.09	protein_coding	9324
0.0005593	0.134	68.25	124.21	99.11	222814_s_at	(1, 2)	ENSG00000174276	zinc finger HIT-type containing 2 [Source:HGNC Symbol;Acc:HGNC:1177]	chr11	65116403	65117701	-1	q13.1	ZNHIT2	68.13	protein_coding	1299
0.001534	0.169	131.46	188.07	159.23	212362_at	(1, 2)	ENSG00000174437	ATPase sarcoplasmic/endoplasmic reticulum Ca2+ transporting 2 [Source:HGNC Symbol;Acc:HGNC:812]	chr12	110280756	110351093	1	q24.11	ATP2A2	43.42	protein_coding	13745
0.0056476	0.247	349.79	257.18	340.55	235241_at	(2, 3)	ENSG00000177058	solute carrier family 38 member 9 [Source:HGNC Symbol;Acc:HGNC:26907]	chr5	55625845	55773194	-1	q11.2	SLC38A9	38.77	protein_coding	8823
0.0096332	0.286	71.08	112.01	88.08	222546_s_at	(1, 2)	ENSG00000177106	EPS8 like 2 [Source:HGNC Symbol;Acc:HGNC:21296]	chr11	694438	727727	1	p15.5	EPS8L2	59.66	protein_coding	5689
0.0068168	0.264	69.35	75.84	59.08	242149_at	(3, 2)	ENSG00000177150	family with sequence similarity 210 member A [Source:HGNC Symbol;Acc:HGNC:28346]	chr18	13663347	13726663	-1	p11.21	FAM210A	40.65	protein_coding	4681
0.000475	0.134	389.44	576.15	522.82	201373_at	(1, 2), (1, 3)	ENSG00000178209	plectin [Source:HGNC Symbol;Acc:HGNC:9069]	chr8	143915153	143976734	-1	q24.3	PLEC	63.62	protein_coding	16992
0.0061742	0.255	94.24	133.31	106.57	218063_s_at	(1, 2)	ENSG00000179604	CDC42 effector protein 4 [Source:HGNC Symbol;Acc:HGNC:17147]	chr17	73283624	73312005	-1	q25.1	CDC42EP4	52.88	protein_coding	4837
0.0097277	0.286	549.76	377.13	399.65	201962_s_at	(2, 1), (3, 1)	ENSG00000181852	ring finger protein 41 [Source:HGNC Symbol;Acc:HGNC:18401]	chr12	56202179	56221933	-1	q13.3	RNF41	47.86	protein_coding	6533
0.0063929	0.255	377.61	503.64	402.54	226833_at	(1, 2), (3, 2)	ENSG00000182224	cytochrome b5 domain containing 1 [Source:HGNC Symbol;Acc:HGNC:26516]	chr17	7857746	7862282	1	p13.1	CYB5D1	48.18	protein_coding	3980
0.0089757	0.282	111.3	195	151.34	217475_s_at	(1, 2)	ENSG00000182541	LIM domain kinase 2 [Source:HGNC Symbol;Acc:HGNC:6614]	chr22	31212239	31280080	1	q12.2	LIMK2	47.35	protein_coding	6170
0.0051523	0.24	60.68	86.55	71.84	201283_s_at	(1, 2)	ENSG00000182606	trafficking kinesin protein 1 [Source:HGNC Symbol;Acc:HGNC:29947]	chr3	42013802	42225890	1	p22.1	TRAK1	44.94	protein_coding	10799
0.0059359	0.25	1098.41	1863.97	1580.75	208978_at	(1, 2)	ENSG00000182809	cysteine rich protein 2 [Source:HGNC Symbol;Acc:HGNC:2361]	chr14	105472962	105480162	1	q32.33	CRIP2	69.59	protein_coding	4165
0.0007972	0.147	171.95	344.81	275.83	200917_s_at	(1, 2), (1, 3)	ENSG00000182934	SRP receptor subunit alpha [Source:HGNC Symbol;Acc:HGNC:11307]	chr11	126262938	126269144	-1	q24.2	SRPRA	49.57	protein_coding	4148
0.0016485	0.169	99.9	191.85	144.83	234730_s_at	(1, 2)	ENSG00000183421	receptor interacting serine/threonine kinase 4 [Source:HGNC Symbol;Acc:HGNC:496]	chr21	41739369	41767089	-1	q22.3	RIPK4	53.49	protein_coding	4016
0.0087549	0.282	44.86	110.72	73.08	1566764_at	(1, 2)	ENSG00000183742	MET transcriptional regulator MACC1 [Source:HGNC Symbol;Acc:HGNC:30215]	chr7	20134655	20217404	-1	p21.1	MACC1	36.44	protein_coding	9898
0.0037734	0.214	664.5	988.69	867.43	208615_s_at	(1, 2)	ENSG00000184007	protein tyrosine phosphatase 4A2 [Source:HGNC Symbol;Acc:HGNC:9635]	chr1	31906421	31944856	-1	p35.2	PTP4A2	41.84	protein_coding	6708
0.0004536	0.132	146.75	286.6	231.1	1555784_s_at	(1, 2), (1, 3)	ENSG00000184216	interleukin 1 receptor associated kinase 1 [Source:HGNC Symbol;Acc:HGNC:6112]	chrX	154010506	154019902	-1	q28	IRAK1	61.62	protein_coding	3917
0.0002761	0.115	87.85	209.28	142.27	209872_s_at	(1, 2)	ENSG00000184363	plakophilin 3 [Source:HGNC Symbol;Acc:HGNC:9025]	chr11	392614	404908	1	p15.5	PKP3	69.71	protein_coding	3795
0.0001513	0.0916	217.72	353.31	291.45	209041_s_at	(1, 2), (1, 3)	ENSG00000184787	ubiquitin conjugating enzyme E2 G2 [Source:HGNC Symbol;Acc:HGNC:12483]	chr21	44768580	44801826	-1	q22.3	UBE2G2	44.85	protein_coding	7195
0.0016654	0.169	729.37	1135.56	729.44	227782_at	(1, 2), (3, 2)	ENSG00000184828	zinc finger and BTB domain containing 7C [Source:HGNC Symbol;Acc:HGNC:31700]	chr18	48026672	48410752	-1	q21.1	ZBTB7C	46.94	protein_coding	7610
0.0001553	0.0916	29.68	47.03	33.21	217675_at	(1, 2), (3, 2)	ENSG00000184828	zinc finger and BTB domain containing 7C [Source:HGNC Symbol;Acc:HGNC:31700]	chr18	48026672	48410752	-1	q21.1	ZBTB7C	46.94	protein_coding	7610
0.000864	0.149	52.8	101.68	68.89	222511_x_at	(1, 2), (3, 2)	ENSG00000185104	Fas associated factor 1 [Source:HGNC Symbol;Acc:HGNC:3578]	chr1	50437028	50960267	-1	p32.3	FAF1	38.27	protein_coding	7549
0.0052926	0.241	80.66	173.65	134.71	213756_s_at	(1, 2)	ENSG00000185122	heat shock transcription factor 1 [Source:HGNC Symbol;Acc:HGNC:5224]	chr8	144291591	144314720	1	q24.3	HSF1	56.87	protein_coding	5305
0.001863	0.175	73.2	150.96	110.07	34478_at	(1, 2)	ENSG00000185236	RAB11B, member RAS oncogene family [Source:HGNC Symbol;Acc:HGNC:9761]	chr19	8389981	8404434	1	p13.2	RAB11B	59.05	protein_coding	2309
0.0038903	0.214	135.46	238.84	189.81	210622_x_at	(1, 2)	ENSG00000185324	cyclin dependent kinase 10 [Source:HGNC Symbol;Acc:HGNC:1770]	chr16	89680737	89696354	1	q24.3	CDK10	55.37	protein_coding	6779
0.0017206	0.172	92.15	189.54	124.45	224173_s_at	(1, 2), (3, 2)	ENSG00000185414	mitochondrial ribosomal protein L30 [Source:HGNC Symbol;Acc:HGNC:14036]	chr2	99181152	99199561	1	q11.2	MRPL30	40.16	protein_coding	4760
0.0021153	0.179	501.32	1521.78	971.9	1564494_s_at	(1, 2)	ENSG00000185624	prolyl 4-hydroxylase subunit beta [Source:HGNC Symbol;Acc:HGNC:8548]	chr17	81843159	81860856	-1	q25.3	P4HB	55.81	protein_coding	11132
0.0052663	0.241	31	52.47	36.62	244623_at	(1, 2), (3, 2)	ENSG00000185760	potassium voltage-gated channel subfamily Q member 5 [Source:HGNC Symbol;Acc:HGNC:6299]	chr6	72621792	73198853	1	q13	KCNQ5	37.35	protein_coding	8157
0.0032561	0.204	666.65	472.04	448.83	222931_s_at	(2, 1), (3, 1)	ENSG00000185875	threonine synthase like 1 [Source:HGNC Symbol;Acc:HGNC:26160]	chr10	25016612	25026664	1	p12.1	THNSL1	37.78	protein_coding	3834
0.0016021	0.169	196.97	114.79	125.92	219800_s_at	(2, 1), (3, 1)	ENSG00000185875	threonine synthase like 1 [Source:HGNC Symbol;Acc:HGNC:26160]	chr10	25016612	25026664	1	p12.1	THNSL1	37.78	protein_coding	3834
0.0027401	0.194	613.36	1312.94	859.92	201551_s_at	(1, 2)	ENSG00000185896	lysosomal associated membrane protein 1 [Source:HGNC Symbol;Acc:HGNC:6499]	chr13	113297239	113323672	1	q34	LAMP1	50.64	protein_coding	5741
0.004384	0.221	290.45	490.93	369.26	226975_at	(1, 2)	ENSG00000185946	RNA binding region (RNP1, RRM) containing 3 [Source:HGNC Symbol;Acc:HGNC:18666]	chr1	103525691	103555239	1	p21.1	RNPC3	35.03	protein_coding	6867
0.0095704	0.286	42.51	59.4	50.25	223868_s_at	(1, 2)	ENSG00000186153	WW domain containing oxidoreductase [Source:HGNC Symbol;Acc:HGNC:12799]	chr16	78099400	79212667	1	q23.1	WWOX	42.64	protein_coding	17115
7.06e-05	0.0572	44.4	76.21	57.39	239960_x_at	(1, 2), (3, 2)	ENSG00000186687	LYR motif containing 7 [Source:HGNC Symbol;Acc:HGNC:28072]	chr5	131170944	131205428	1	q23.3	LYRM7	38.04	protein_coding	6219
0.0027768	0.194	758.37	475.64	512.12	213779_at	(2, 1), (3, 1)	ENSG00000186998	EMI domain containing 1 [Source:HGNC Symbol;Acc:HGNC:18036]	chr22	29205896	29259597	1	q12.2	EMID1	52.61	protein_coding	4854
0.0051954	0.24	469.27	809.96	620.35	203009_at	(1, 2)	ENSG00000187244	basal cell adhesion molecule (Lutheran blood group) [Source:HGNC Symbol;Acc:HGNC:6722]	chr19	44809071	44821421	1	q13.32	BCAM	58.92	protein_coding	4997
0.0002395	0.103	271.89	245.51	192.15	229693_at	(3, 1), (3, 2)	ENSG00000187824	transmembrane protein 220 [Source:HGNC Symbol;Acc:HGNC:33757]	chr17	10699015	10730023	-1	p13.1	TMEM220	40.19	protein_coding	3215
0.0095463	0.286	79.96	53.94	59.16	204389_at	(2, 1)	ENSG00000189221	monoamine oxidase A [Source:HGNC Symbol;Acc:HGNC:6833]	chrX	43654907	43746824	1	p11.3	MAOA	40.27	protein_coding	5528
0.0077752	0.273	352.93	143.63	134.55	238018_at	(2, 1), (3, 1)	ENSG00000189292	ALK and LTK ligand 2 [Source:HGNC Symbol;Acc:HGNC:27683]	chr2	279558	288851	-1	p25.3	ALKAL2	48.13	protein_coding	1986
0.0095726	0.286	262.65	411.74	331.34	221771_s_at	(1, 2)	ENSG00000196199	M-phase phosphoprotein 8 [Source:HGNC Symbol;Acc:HGNC:29810]	chr13	19633659	19673441	1	q12.11	MPHOSPH8	43.32	protein_coding	4909
0.0029756	0.197	23.75	32.64	26.54	217602_at	(1, 2), (3, 2)	ENSG00000196262	peptidylprolyl isomerase A [Source:HGNC Symbol;Acc:HGNC:9253]	chr7	44796680	44824564	1	p13	PPIA	47.06	protein_coding	6780
0.0096812	0.286	352.57	245.86	237.2	1554470_s_at	(2, 1), (3, 1)	ENSG00000196323	zinc finger and BTB domain containing 44 [Source:HGNC Symbol;Acc:HGNC:25001]	chr11	130226677	130314917	-1	q24.3	ZBTB44	39.22	protein_coding	11032
0.0011509	0.16	217.04	119.14	149.69	213519_s_at	(2, 1)	ENSG00000196569	laminin subunit alpha 2 [Source:HGNC Symbol;Acc:HGNC:6482]	chr6	128883138	129516566	1	q22.33	LAMA2	36.02	protein_coding	10358
0.0039721	0.214	243.15	139.79	160.67	216840_s_at	(2, 1), (3, 1)	ENSG00000196569	laminin subunit alpha 2 [Source:HGNC Symbol;Acc:HGNC:6482]	chr6	128883138	129516566	1	q22.33	LAMA2	36.02	protein_coding	10358
0.0018287	0.174	160.57	93.56	107.11	205116_at	(2, 1), (3, 1)	ENSG00000196569	laminin subunit alpha 2 [Source:HGNC Symbol;Acc:HGNC:6482]	chr6	128883138	129516566	1	q22.33	LAMA2	36.02	protein_coding	10358
0.0088701	0.282	178.1	143.74	209.25	228837_at	(2, 3)	ENSG00000196628	transcription factor 4 [Source:HGNC Symbol;Acc:HGNC:11634]	chr18	55222185	55664787	-1	q21.2	TCF4	37.78	protein_coding	29166
0.0097164	0.286	1380.56	1057.39	1474.1	212386_at	(2, 3)	ENSG00000196628	transcription factor 4 [Source:HGNC Symbol;Acc:HGNC:11634]	chr18	55222185	55664787	-1	q21.2	TCF4	37.78	protein_coding	29166
0.0026591	0.192	219.39	153.63	197.38	236236_at	(2, 1), (2, 3)	ENSG00000196632	WNK lysine deficient protein kinase 3 [Source:HGNC Symbol;Acc:HGNC:14543]	chrX	54192823	54358642	-1	p11.22	WNK3	40.03	protein_coding	11472
0.0025251	0.189	111.21	171.64	138.67	33646_g_at	(1, 2)	ENSG00000196743	GM2 ganglioside activator [Source:HGNC Symbol;Acc:HGNC:4367]	chr5	151212150	151270440	1	q33.1	GM2A	47.41	protein_coding	4186
0.009391	0.285	83.9	135.53	103.02	215891_s_at	(1, 2)	ENSG00000196743	GM2 ganglioside activator [Source:HGNC Symbol;Acc:HGNC:4367]	chr5	151212150	151270440	1	q33.1	GM2A	47.41	protein_coding	4186
0.0029	0.194	2145.89	1439.31	1498.32	203221_at	(2, 1), (3, 1)	ENSG00000196781	TLE family member 1, transcriptional corepressor [Source:HGNC Symbol;Acc:HGNC:11837]	chr9	81583683	81689547	-1	q21.32	TLE1	43.5	protein_coding	5257
0.0045042	0.224	57.99	101.66	99.17	220940_at	(1, 2), (1, 3)	ENSG00000196912	ankyrin repeat domain 36B [Source:HGNC Symbol;Acc:HGNC:29333]	chr2	97492663	97589965	-1	q11.2	ANKRD36B	35.8	protein_coding	6771
0.0076348	0.271	89.66	165.99	131.81	234068_s_at	(1, 2)	ENSG00000196961	adaptor related protein complex 2 subunit alpha 1 [Source:HGNC Symbol;Acc:HGNC:561]	chr19	49767001	49807114	1	q13.33	AP2A1	54.54	protein_coding	8714
0.0071774	0.267	1211.44	856.96	968.34	210266_s_at	(2, 1)	ENSG00000197323	tripartite motif containing 33 [Source:HGNC Symbol;Acc:HGNC:16290]	chr1	114392790	114511203	-1	p13.2	TRIM33	38.21	protein_coding	9604
0.0009632	0.155	107.16	303.01	171.08	204614_at	(1, 2), (3, 2)	ENSG00000197632	serpin family B member 2 [Source:HGNC Symbol;Acc:HGNC:8584]	chr18	63871692	63903888	1	q21.33	SERPINB2	38.08	protein_coding	2741
0.0077004	0.271	434	691.97	430.06	210136_at	(3, 2)	ENSG00000197971	myelin basic protein [Source:HGNC Symbol;Acc:HGNC:6925]	chr18	76978827	77133683	-1	q23	MBP	48.31	protein_coding	18730
0.0028883	0.194	439.16	624.38	450.66	1554544_a_at	(1, 2), (3, 2)	ENSG00000197971	myelin basic protein [Source:HGNC Symbol;Acc:HGNC:6925]	chr18	76978827	77133683	-1	q23	MBP	48.31	protein_coding	18730
0.0075973	0.271	144.85	192.67	155.65	225408_at	(1, 2), (3, 2)	ENSG00000197971	myelin basic protein [Source:HGNC Symbol;Acc:HGNC:6925]	chr18	76978827	77133683	-1	q23	MBP	48.31	protein_coding	18730
0.0063234	0.255	47.34	83.4	65.61	1552737_s_at	(1, 2)	ENSG00000198373	WW domain containing E3 ubiquitin protein ligase 2 [Source:HGNC Symbol;Acc:HGNC:16804]	chr16	69762328	69941741	1	q22.1	WWP2	45.59	protein_coding	8993
0.0013636	0.169	123.4	272.25	219.42	243495_s_at	(1, 2), (1, 3)	ENSG00000198740	zinc finger protein 652 [Source:HGNC Symbol;Acc:HGNC:29147]	chr17	49289206	49362473	-1	q21.33	ZNF652	41.52	protein_coding	11813
0.0011207	0.16	182.89	111.63	191.61	235048_at	(2, 3)	ENSG00000198780	family with sequence similarity 169 member A [Source:HGNC Symbol;Acc:HGNC:29138]	chr5	74777574	74866966	-1	q13.3	FAM169A	38.67	protein_coding	6875
0.0039178	0.214	251.68	462.86	376.02	221764_at	(1, 2)	ENSG00000198858	R3H domain containing 4 [Source:HGNC Symbol;Acc:HGNC:28270]	chr19	896503	913245	-1	p13.3	R3HDM4	58.93	protein_coding	2957
0.0042853	0.22	942.79	621.23	685.72	225399_at	(2, 1), (3, 1)	ENSG00000198860	tRNA splicing endonuclease subunit 15 [Source:HGNC Symbol;Acc:HGNC:16791]	chr1	184051651	184123978	1	q25.3	TSEN15	38.96	protein_coding	10197
0.0072319	0.267	316.99	210.08	156.73	203881_s_at	(3, 1)	ENSG00000198947	dystrophin [Source:HGNC Symbol;Acc:HGNC:2928]	chrX	31097677	33339609	-1	p21.1	DMD	36.42	protein_coding	55038
0.00355	0.212	103.84	220.93	159.41	215099_s_at	(1, 2)	ENSG00000204231	retinoid X receptor beta [Source:HGNC Symbol;Acc:HGNC:10478]	chr6	33193588	33200665	-1	p21.32	RXRB	53.9	protein_coding	3897
0.0093121	0.284	42.3	68.91	54.35	60794_f_at	(1, 2)	ENSG00000204514	zinc finger protein 814 [Source:HGNC Symbol;Acc:HGNC:33258]	chr19	57848731	57889074	-1	q13.43	ZNF814	46.12	protein_coding	13421
0.0010272	0.16	326.51	535.8	398.57	227455_at	(1, 2), (3, 2)	ENSG00000204564	chromosome 6 open reading frame 136 [Source:HGNC Symbol;Acc:HGNC:21301]	chr6	30647039	30653210	1	p21.33	C6orf136	52.14	protein_coding	2118
0.0061965	0.255	561.8	783.38	615.86	208907_s_at	(1, 2), (3, 2)	ENSG00000204568	mitochondrial ribosomal protein S18B [Source:HGNC Symbol;Acc:HGNC:14516]	chr6	30617840	30626395	1	p21.33	MRPS18B	46.12	protein_coding	1757
0.0057464	0.249	60.8	82.38	68.74	1555821_a_at	(1, 2)	ENSG00000204673	AKT1 substrate 1 [Source:HGNC Symbol;Acc:HGNC:28426]	chr19	49869033	49878459	-1	q13.33	AKT1S1	59.67	protein_coding	5737
0.0099978	0.288	26.55	35.55	30.76	1569142_at	(1, 2)	ENSG00000204977	tripartite motif containing 13 [Source:HGNC Symbol;Acc:HGNC:9976]	chr13	49995888	50020481	1	q14.2	TRIM13	41.26	protein_coding	8096
0.0064887	0.257	60.48	88.89	72.26	229739_s_at	(1, 2)	ENSG00000205593	DENN domain containing 6B [Source:HGNC Symbol;Acc:HGNC:32690]	chr22	50309030	50327012	-1	q13.33	DENND6B	60.21	protein_coding	5887
0.0076517	0.271	185.47	235	175.38	227941_at	(3, 2)	ENSG00000212978	novel transcript	chr2	61141592	61144969	-1	p15		45.77	lncRNA	3109
0.0003864	0.127	81.38	147.37	102.39	206480_at	(1, 2), (3, 2)	ENSG00000213316	leukotriene C4 synthase [Source:HGNC Symbol;Acc:HGNC:6719]	chr5	179793980	179796647	1	q35.3	LTC4S	67.09	protein_coding	1192
0.0095105	0.286	59.49	39.01	40.46	214660_at	(2, 1), (3, 1)	ENSG00000213949	integrin subunit alpha 1 [Source:HGNC Symbol;Acc:HGNC:6134]	chr5	52787916	52959209	1	q11.2	ITGA1	36.8	protein_coding	18545
0.0054222	0.243	38.82	90.8	60.64	222501_s_at	(1, 2)	ENSG00000214022	replication initiator 1 [Source:HGNC Symbol;Acc:HGNC:17922]	chr7	150368189	150374044	1	q36.1	REPIN1	62.28	protein_coding	4649
0.0066665	0.261	105.17	64.66	90.37	241710_at	(2, 1)	ENSG00000223658	C1GALT1 specific chaperone 1 like [Source:HGNC Symbol;Acc:HGNC:51617]	chr2	43675151	43676429	-1	p21	C1GALT1C1L	41.52	protein_coding	1279
0.0035773	0.212	265.31	442.99	331.94	1555565_s_at	(1, 2)	ENSG00000231925	TAP binding protein [Source:HGNC Symbol;Acc:HGNC:11566]	chr6	33299694	33314387	-1	p21.32	TAPBP	50.01	protein_coding	5056
0.0088384	0.282	132.74	93.81	86.74	239791_at	(3, 1)	ENSG00000233101	HOXB cluster antisense RNA 3 [Source:HGNC Symbol;Acc:HGNC:40283]	chr17	48549630	48606414	1	q21.32	HOXB-AS3	52.62	lncRNA	1913
0.0042121	0.219	60.32	94.55	83.72	236310_at	(1, 2)	ENSG00000234420	zinc finger protein 37B, pseudogene [Source:HGNC Symbol;Acc:HGNC:13103]	chr10	42513510	42552822	-1	q11.21	ZNF37BP	39.07	transcribed_processed_pseudogene	10256
0.0025296	0.189	38.78	63.79	50.79	232178_at	(1, 2)	ENSG00000237149	ZNF503 antisense RNA 2 [Source:HGNC Symbol;Acc:HGNC:23525]	chr10	75401519	75408982	1	q22.2	ZNF503-AS2	59.66	lncRNA	3348
0.0020993	0.179	171.95	255.86	177.48	236321_at	(1, 2), (3, 2)	ENSG00000237765	family with sequence similarity 200 member B [Source:HGNC Symbol;Acc:HGNC:27740]	chr4	15681662	15690447	1	p15.32	FAM200B	36.56	protein_coding	4766
0.0028912	0.194	67.03	110.76	82.9	1555639_a_at	(1, 2)	ENSG00000239306	RNA binding motif protein 14 [Source:HGNC Symbol;Acc:HGNC:14219]	chr11	66616626	66629934	1	q13.2	RBM14	49.61	protein_coding	6480
0.0008744	0.149	188	116.19	114.56	206286_s_at	(2, 1), (3, 1)	ENSG00000241186	teratocarcinoma-derived growth factor 1 [Source:HGNC Symbol;Acc:HGNC:11701]	chr3	46574534	46582457	1	p21.31	TDGF1	45.44	protein_coding	2489
0.0084078	0.281	303.68	89.82	234.65	242881_x_at	(2, 3)	ENSG00000244306	double homeobox A pseudogene 10 [Source:NCBI gene (formerly Entrezgene);Acc:503639]	chr14	19268853	19337730	-1	q11.2	DUXAP10	40.31	transcribed_processed_pseudogene	12311
0.0074338	0.268	147.2	163.79	127.28	1553396_a_at	(3, 2)	ENSG00000244607	coiled-coil domain containing 13 [Source:HGNC Symbol;Acc:HGNC:26358]	chr3	42705756	42773253	-1	p22.1	CCDC13	47.17	protein_coding	7071
0.0020955	0.179	229.9	154.88	128.73	206777_s_at	(3, 1)	ENSG00000244752	crystallin beta B2 [Source:HGNC Symbol;Acc:HGNC:2398]	chr22	25212564	25231870	1	q11.23	CRYBB2	47.64	protein_coding	1047
4.57e-05	0.0569	18.19	33.47	23.62	235547_at	(1, 2), (3, 2)	ENSG00000244754	NEDD4 binding protein 2 like 2 [Source:HGNC Symbol;Acc:HGNC:26916]	chr13	32432417	32538885	-1	q13.1	N4BP2L2	39.02	protein_coding	21002
0.0059291	0.25	67.11	110.82	84.06	242518_at	(1, 2)	ENSG00000245849	RAD51 antisense RNA 1 [Source:HGNC Symbol;Acc:HGNC:48621]	chr15	40686183	40695107	-1	q15.1	RAD51-AS1	45.04	lncRNA	2820
0.0007505	0.141	313.11	570.57	456.48	223578_x_at	(1, 2)	ENSG00000251562	metastasis associated lung adenocarcinoma transcript 1 [Source:HGNC Symbol;Acc:HGNC:29665]	chr11	65497688	65506516	1	q13.1	MALAT1	40.56	lncRNA	8829
0.0019388	0.176	914.26	2152.14	1715	223940_x_at	(1, 2), (1, 3)	ENSG00000251562	metastasis associated lung adenocarcinoma transcript 1 [Source:HGNC Symbol;Acc:HGNC:29665]	chr11	65497688	65506516	1	q13.1	MALAT1	40.56	lncRNA	8829
0.0049462	0.237	298.32	770.72	543.41	227510_x_at	(1, 2)	ENSG00000251562	metastasis associated lung adenocarcinoma transcript 1 [Source:HGNC Symbol;Acc:HGNC:29665]	chr11	65497688	65506516	1	q13.1	MALAT1	40.56	lncRNA	8829
0.0003319	0.12	386.49	1142.57	851.88	224568_x_at	(1, 2), (1, 3)	ENSG00000251562	metastasis associated lung adenocarcinoma transcript 1 [Source:HGNC Symbol;Acc:HGNC:29665]	chr11	65497688	65506516	1	q13.1	MALAT1	40.56	lncRNA	8829
0.0016209	0.169	1904.87	3644.68	3391.91	1558678_s_at	(1, 2), (1, 3)	ENSG00000251562	metastasis associated lung adenocarcinoma transcript 1 [Source:HGNC Symbol;Acc:HGNC:29665]	chr11	65497688	65506516	1	q13.1	MALAT1	40.56	lncRNA	8829
0.0006152	0.136	602.32	1421.14	1185.41	224567_x_at	(1, 2), (1, 3)	ENSG00000251562	metastasis associated lung adenocarcinoma transcript 1 [Source:HGNC Symbol;Acc:HGNC:29665]	chr11	65497688	65506516	1	q13.1	MALAT1	40.56	lncRNA	8829
0.0018219	0.174	255.56	563.17	449.55	226675_s_at	(1, 2), (1, 3)	ENSG00000251562	metastasis associated lung adenocarcinoma transcript 1 [Source:HGNC Symbol;Acc:HGNC:29665]	chr11	65497688	65506516	1	q13.1	MALAT1	40.56	lncRNA	8829
0.0096799	0.286	1320.13	1033.68	1007.13	223162_s_at	(2, 1), (3, 1)	ENSG00000257093	DENN domain containing 11 [Source:HGNC Symbol;Acc:HGNC:29472]	chr7	141656728	141702166	-1	q34	DENND11	43.52	protein_coding	7369
0.0081266	0.279	179.33	275.02	241.26	217856_at	(1, 2)	ENSG00000265241	RNA binding motif protein 8A [Source:HGNC Symbol;Acc:HGNC:9905]	chr1	145917714	145927678	-1	q21.1	RBM8A	46.78	protein_coding	5544
0.0031729	0.202	941.38	1891.26	1420.51	201008_s_at	(1, 2)	ENSG00000265972	thioredoxin interacting protein [Source:HGNC Symbol;Acc:HGNC:16952]	chr1	145992435	145996579	-1	q21.1	TXNIP	42.39	protein_coding	3604
0.002537	0.189	126.13	194.02	161.7	211973_at	(1, 2)	ENSG00000272325	nudix hydrolase 3 [Source:HGNC Symbol;Acc:HGNC:8050]	chr6	34279679	34392669	-1	p21.31	NUDT3	42.12	protein_coding	9900
0.00626	0.255	252.54	381.33	333.16	1554410_a_at	(1, 2)	ENSG00000274523	RCC1 like [Source:HGNC Symbol;Acc:HGNC:14948]	chr7	75027122	75074228	-1	q11.23	RCC1L	51.13	protein_coding	4196
0.0039064	0.214	273.48	119.17	160.12	214469_at	(2, 1)	ENSG00000277075	H2A clustered histone 8 [Source:HGNC Symbol;Acc:HGNC:4724]	chr6	26216975	26217483	1	p22.2	H2AC8	56.19	protein_coding	509
0.0009181	0.149	167.4	301.58	195.06	218756_s_at	(1, 2), (3, 2)	ENSG00000278535	dehydrogenase/reductase 11 [Source:HGNC Symbol;Acc:HGNC:28639]	chr17	36591879	36600804	1	q12	DHRS11	54.25	protein_coding	5379
0.0055478	0.244	515.43	420.07	549.51	213510_x_at	(2, 3)	ENSG00000290659	novel transcript	chr17	18511262	18521252	-1				lncRNA

## Sheet: GSE30161
Parametric p-value	FDR	Complete response	Partial response	Fold-change	ProbeSet	Ensembl_ID	Gene_description	Chromosome_scaffold_name	Gene_start_bp	Gene_end_bp	Strand	Karyotype_band	Gene_name	Gene_GC_content	Gene_type	Gene_Length
0.002623	0.857	12	8.51	1.41	203746_s_at	ENSG00000004961	holocytochrome c synthase [Source:HGNC Symbol;Acc:HGNC:4837]	chrX	11111301	11123086	1	p22.2	HCCS	42.97	protein_coding	2343
0.0047967	0.857	17.46	22.54	0.77	202590_s_at	ENSG00000005882	pyruvate dehydrogenase kinase 2 [Source:HGNC Symbol;Acc:HGNC:8810]	chr17	50094737	50112152	1	q21.33	PDK2	56.67	protein_coding	5471
0.0011018	0.857	30.27	41.52	0.73	201474_s_at	ENSG00000005884	integrin subunit alpha 3 [Source:HGNC Symbol;Acc:HGNC:6139]	chr17	50055968	50090481	1	q21.33	ITGA3	52.64	protein_coding	9802
0.009012	0.857	5.56	8.31	0.67	216966_at	ENSG00000005961	integrin subunit alpha 2b [Source:HGNC Symbol;Acc:HGNC:6138]	chr17	44372180	44389649	-1	q21.31	ITGA2B	54.81	protein_coding	5695
0.0083946	0.857	41.4	84.28	0.49	208918_s_at	ENSG00000008130	NAD kinase [Source:HGNC Symbol;Acc:HGNC:29831]	chr1	1751232	1780457	-1	p36.33	NADK	53.7	protein_coding	5570
0.0039314	0.857	56.69	89.02	0.64	37408_at	ENSG00000011028	mannose receptor C type 2 [Source:HGNC Symbol;Acc:HGNC:16875]	chr17	62627670	62693597	1	q23.2	MRC2	52.16	protein_coding	6591
0.0081625	0.857	7.84	14.82	0.53	235563_at	ENSG00000013588	G protein-coupled receptor class C group 5 member A [Source:HGNC Symbol;Acc:HGNC:9836]	chr12	12891559	12917937	1	p13.1	GPRC5A	46.32	protein_coding	7663
0.0054644	0.857	20.16	31.46	0.64	203108_at	ENSG00000013588	G protein-coupled receptor class C group 5 member A [Source:HGNC Symbol;Acc:HGNC:9836]	chr12	12891559	12917937	1	p13.1	GPRC5A	46.32	protein_coding	7663
0.0057576	0.857	3.1	4.45	0.7	204393_s_at	ENSG00000014257	acid phosphatase 3 [Source:HGNC Symbol;Acc:HGNC:125]	chr3	132317369	132368298	1	q22.1	ACP3	40.39	protein_coding	4280
0.0067056	0.857	121.14	263.91	0.46	231579_s_at	ENSG00000035862	TIMP metallopeptidase inhibitor 2 [Source:HGNC Symbol;Acc:HGNC:11821]	chr17	78852977	78925387	-1	q25.3	TIMP2	52.6	protein_coding	5633
0.0025102	0.857	34.63	46.79	0.74	203167_at	ENSG00000035862	TIMP metallopeptidase inhibitor 2 [Source:HGNC Symbol;Acc:HGNC:11821]	chr17	78852977	78925387	-1	q25.3	TIMP2	52.6	protein_coding	5633
0.0031494	0.857	19.97	14.59	1.37	204332_s_at	ENSG00000038002	aspartylglucosaminidase [Source:HGNC Symbol;Acc:HGNC:318]	chr4	177430774	177442437	-1	q34.3	AGA	39.69	protein_coding	2605
0.0004597	0.857	13.05	36.36	0.36	221731_x_at	ENSG00000038427	versican [Source:HGNC Symbol;Acc:HGNC:2464]	chr5	83471618	83582303	1	q14.2	VCAN	37.18	protein_coding	14678
0.001024	0.857	11.55	24.87	0.46	204619_s_at	ENSG00000038427	versican [Source:HGNC Symbol;Acc:HGNC:2464]	chr5	83471618	83582303	1	q14.2	VCAN	37.18	protein_coding	14678
0.0019581	0.857	20.88	39.28	0.53	211571_s_at	ENSG00000038427	versican [Source:HGNC Symbol;Acc:HGNC:2464]	chr5	83471618	83582303	1	q14.2	VCAN	37.18	protein_coding	14678
0.0029567	0.857	13.47	32.44	0.42	204620_s_at	ENSG00000038427	versican [Source:HGNC Symbol;Acc:HGNC:2464]	chr5	83471618	83582303	1	q14.2	VCAN	37.18	protein_coding	14678
0.0013486	0.857	6.81	19.86	0.34	215646_s_at	ENSG00000038427	versican [Source:HGNC Symbol;Acc:HGNC:2464]	chr5	83471618	83582303	1	q14.2	VCAN	37.18	protein_coding	14678
0.008448	0.857	18.83	26.36	0.71	1558214_s_at	ENSG00000044115	catenin alpha 1 [Source:HGNC Symbol;Acc:HGNC:2509]	chr5	138610967	138935034	1	q31.2	CTNNA1	44.15	protein_coding	8830
0.0068341	0.857	114.54	223.53	0.51	211936_at	ENSG00000044574	heat shock protein family A (Hsp70) member 5 [Source:HGNC Symbol;Acc:HGNC:5238]	chr9	125234853	125241382	-1	q33.3	HSPA5	44.15	protein_coding	6530
0.0023128	0.857	4.08	2.82	1.45	244370_at	ENSG00000050030	neurite extension and migration factor [Source:HGNC Symbol;Acc:HGNC:29433]	chrX	74732856	74925472	-1	q13.3	NEXMIF	39.49	protein_coding	12338
0.0085133	0.857	16.04	11.74	1.37	214154_s_at	ENSG00000057294	plakophilin 2 [Source:HGNC Symbol;Acc:HGNC:9024]	chr12	32790755	32896777	-1	p11.21	PKP2	40.77	protein_coding	6970
0.0036438	0.857	18.93	26.85	0.7	229856_s_at	ENSG00000057757	PITH domain containing 1 [Source:HGNC Symbol;Acc:HGNC:25022]	chr1	23778418	23788232	1	p36.11	PITHD1	44.53	protein_coding	2173
0.0078236	0.857	11.59	8.48	1.37	220615_s_at	ENSG00000064763	fatty acyl-CoA reductase 2 [Source:HGNC Symbol;Acc:HGNC:25531]	chr12	29149103	29340980	1	p11.22	FAR2	38.9	protein_coding	5411
0.0029311	0.857	17.23	23.91	0.72	203857_s_at	ENSG00000065485	protein disulfide isomerase family A member 5 [Source:HGNC Symbol;Acc:HGNC:24811]	chr3	123067025	123225227	1	q21.1	PDIA5	45.22	protein_coding	4067
0.0024753	0.857	17.22	26.13	0.66	209514_s_at	ENSG00000069974	RAB27A, member RAS oncogene family [Source:HGNC Symbol;Acc:HGNC:9766]	chr15	55202966	55319113	-1	q21.3	RAB27A	41.6	protein_coding	5603
0.003194	0.857	14.64	19.53	0.75	217957_at	ENSG00000070761	cilia and flagella associated protein 20 [Source:HGNC Symbol;Acc:HGNC:29523]	chr16	58113592	58129381	-1	q21	CFAP20	44.82	protein_coding	2302
0.0028173	0.857	19.26	25.89	0.74	232865_at	ENSG00000072364	AF4/FMR2 family member 4 [Source:HGNC Symbol;Acc:HGNC:17869]	chr5	132875395	132963634	-1	q31.1	AFF4	40.42	protein_coding	11281
0.0055229	0.857	22.2	34.22	0.65	204589_at	ENSG00000074590	NUAK family kinase 1 [Source:HGNC Symbol;Acc:HGNC:14311]	chr12	106063345	106138954	-1	q23.3	NUAK1	45.55	protein_coding	5924
0.0094317	0.857	32.22	50.93	0.63	225262_at	ENSG00000075426	FOS like 2, AP-1 transcription factor subunit [Source:HGNC Symbol;Acc:HGNC:3798]	chr2	28392448	28417317	1	p23.2	FOSL2	51.81	protein_coding	7162
0.0014333	0.857	8.75	6.01	1.46	239146_at	ENSG00000080822	claudin domain containing 1 [Source:HGNC Symbol;Acc:HGNC:1322]	chr3	98497912	98523066	-1	q11.2	CLDND1	38.91	protein_coding	5210
0.0064912	0.857	24.04	42.78	0.56	208703_s_at	ENSG00000084234	amyloid beta precursor like protein 2 [Source:HGNC Symbol;Acc:HGNC:598]	chr11	130068147	130144811	1	q24.3	APLP2	43.97	protein_coding	7463
0.0063292	0.857	196.96	367.1	0.54	223748_at	ENSG00000088836	solute carrier family 4 member 11 [Source:HGNC Symbol;Acc:HGNC:16438]	chr20	3227417	3239559	-1	p13	SLC4A11	61.73	protein_coding	4319
0.0015535	0.857	43.75	79.57	0.55	202637_s_at	ENSG00000090339	intercellular adhesion molecule 1 [Source:HGNC Symbol;Acc:HGNC:5344]	chr19	10271093	10286615	1	p13.2	ICAM1	51.86	protein_coding	3448
0.0085088	0.857	19.52	14.73	1.32	238613_at	ENSG00000091436	mitogen-activated protein kinase kinase kinase 20 [Source:HGNC Symbol;Acc:HGNC:17797]	chr2	173075435	173268015	1	q31.1	MAP3K20	38.91	protein_coding	13804
0.0096455	0.857	5.34	4.05	1.32	228771_at	ENSG00000100077	G protein-coupled receptor kinase 3 [Source:HGNC Symbol;Acc:HGNC:290]	chr22	25564675	25729294	1	q12.1	GRK3	40.6	protein_coding	9477
0.0093907	0.857	71.63	131.24	0.55	201147_s_at	ENSG00000100234	TIMP metallopeptidase inhibitor 3 [Source:HGNC Symbol;Acc:HGNC:11822]	chr22	32801705	32863041	1	q12.3	TIMP3	47.17	protein_coding	4597
0.0074045	0.857	12.83	24.4	0.53	201150_s_at	ENSG00000100234	TIMP metallopeptidase inhibitor 3 [Source:HGNC Symbol;Acc:HGNC:11822]	chr22	32801705	32863041	1	q12.3	TIMP3	47.17	protein_coding	4597
0.0074139	0.857	13.84	18.45	0.75	1570210_x_at	ENSG00000100239	protein phosphatase 6 regulatory subunit 2 [Source:HGNC Symbol;Acc:HGNC:19253]	chr22	50343304	50445090	1	q13.33	PPP6R2	51.13	protein_coding	5349
0.0012922	0.857	6.71	4.73	1.42	227728_at	ENSG00000100614	protein phosphatase, Mg2+/Mn2+ dependent 1A [Source:HGNC Symbol;Acc:HGNC:9275]	chr14	60245752	60299087	1	q23.1	PPM1A	36.08	protein_coding	11907
0.0032137	0.857	11.63	15.47	0.75	217935_s_at	ENSG00000101019	ubiquinol-cytochrome c reductase complex assembly factor 1 [Source:HGNC Symbol;Acc:HGNC:15891]	chr20	35302566	35412031	-1	q11.22	UQCC1	43	protein_coding	6672
0.0020993	0.857	13.92	20.04	0.69	224368_s_at	ENSG00000101079	NDRG family member 3 [Source:HGNC Symbol;Acc:HGNC:14462]	chr20	36651766	36746090	-1	q11.23	NDRG3	44.5	protein_coding	3260
0.0003319	0.857	25.28	64.55	0.39	209596_at	ENSG00000101825	matrix remodeling associated 5 [Source:HGNC Symbol;Acc:HGNC:7539]	chrX	3308565	3346652	-1	p22.33	MXRA5	43.18	protein_coding	9804
0.0065251	0.857	11.65	17.19	0.68	212603_at	ENSG00000102738	mitochondrial ribosomal protein S31 [Source:HGNC Symbol;Acc:HGNC:16632]	chr13	40729128	40771190	-1	q14.11	MRPS31	39.2	protein_coding	2148
0.0048292	0.857	11.84	17.21	0.69	205687_at	ENSG00000103353	ubiquitin family domain containing 1 [Source:HGNC Symbol;Acc:HGNC:30565]	chr16	23557721	23574389	1	p12.2	UBFD1	47.04	protein_coding	8260
0.0028577	0.857	4.66	7.49	0.62	215761_at	ENSG00000104093	Dmx like 2 [Source:HGNC Symbol;Acc:HGNC:2938]	chr15	51447711	51622833	-1	q21.2	DMXL2	36.95	protein_coding	13807
0.0041942	0.857	4.52	3.02	1.5	226269_at	ENSG00000104381	ganglioside induced differentiation associated protein 1 [Source:HGNC Symbol;Acc:HGNC:15968]	chr8	74320613	74518007	1	q21.11	GDAP1	37.93	protein_coding	24256
0.0071167	0.857	7.53	5.84	1.29	221279_at	ENSG00000104381	ganglioside induced differentiation associated protein 1 [Source:HGNC Symbol;Acc:HGNC:15968]	chr8	74320613	74518007	1	q21.11	GDAP1	37.93	protein_coding	24256
0.004943	0.857	5.81	4	1.45	235801_at	ENSG00000104723	tumor suppressor candidate 3 [Source:HGNC Symbol;Acc:HGNC:30242]	chr8	15417215	15766649	1	p22	TUSC3	36.98	protein_coding	5190
0.0090003	0.857	43.71	69.8	0.63	232977_x_at	ENSG00000105357	myosin heavy chain 14 [Source:HGNC Symbol;Acc:HGNC:23212]	chr19	50188186	50310542	1	q13.33	MYH14	50.8	protein_coding	10396
0.0061818	0.857	52.59	77.63	0.68	219946_x_at	ENSG00000105357	myosin heavy chain 14 [Source:HGNC Symbol;Acc:HGNC:23212]	chr19	50188186	50310542	1	q13.33	MYH14	50.8	protein_coding	10396
0.0031023	0.857	35.61	79.05	0.45	205816_at	ENSG00000105855	integrin subunit beta 8 [Source:HGNC Symbol;Acc:HGNC:6163]	chr7	20330702	20415754	1	p21.1	ITGB8	37.44	protein_coding	15156
0.0089654	0.857	22.17	16.98	1.31	1553159_at	ENSG00000105877	dynein axonemal heavy chain 11 [Source:HGNC Symbol;Acc:HGNC:2942]	chr7	21543039	21901839	1	p15.3	DNAH11	38.74	protein_coding	16174
0.0013915	0.857	8.98	6.83	1.31	205429_s_at	ENSG00000105926	membrane palmitoylated protein 6 [Source:HGNC Symbol;Acc:HGNC:18167]	chr7	24573268	24694193	1	p15.3	MPP6	35.88	protein_coding	9369
0.0072795	0.857	15.37	11.42	1.35	218008_at	ENSG00000106609	transmembrane protein 248 [Source:HGNC Symbol;Acc:HGNC:25476]	chr7	66921225	66958551	1	q11.21	TMEM248	44.8	protein_coding	5086
0.0036452	0.857	285.03	589.88	0.48	201792_at	ENSG00000106624	AE binding protein 1 [Source:HGNC Symbol;Acc:HGNC:303]	chr7	44104345	44114562	1	p13	AEBP1	62.7	protein_coding	4971
0.0087444	0.857	16.26	12.22	1.33	236561_at	ENSG00000106799	transforming growth factor beta receptor 1 [Source:HGNC Symbol;Acc:HGNC:11772]	chr9	99104038	99154192	1	q22.33	TGFBR1	39.03	protein_coding	6822
0.0027537	0.857	11.22	8.46	1.33	206196_s_at	ENSG00000108309	RUN domain containing 3A [Source:HGNC Symbol;Acc:HGNC:16984]	chr17	44308413	44318670	1	q21.31	RUNDC3A	59.03	protein_coding	4904
0.0012109	0.857	45.41	72.92	0.62	239197_s_at	ENSG00000108799	enhancer of zeste 1 polycomb repressive complex 2 subunit [Source:HGNC Symbol;Acc:HGNC:3526]	chr17	42700275	42745049	-1	q21.2	EZH1	45.44	protein_coding	6988
0.0077932	0.857	42.1	102.33	0.41	202311_s_at	ENSG00000108821	collagen type I alpha 1 chain [Source:HGNC Symbol;Acc:HGNC:2197]	chr17	50184101	50201632	-1	q21.33	COL1A1	58.48	protein_coding	9007
0.0054008	0.857	528.79	1052.56	0.5	202310_s_at	ENSG00000108821	collagen type I alpha 1 chain [Source:HGNC Symbol;Acc:HGNC:2197]	chr17	50184101	50201632	-1	q21.33	COL1A1	58.48	protein_coding	9007
0.0069448	0.857	139.88	276.72	0.51	201296_s_at	ENSG00000109046	WD repeat and SOCS box containing 1 [Source:HGNC Symbol;Acc:HGNC:19221]	chr17	27294076	27315926	1	q11.1	WSB1	39.73	protein_coding	8602
0.0037926	0.857	5.9	4.45	1.33	219502_at	ENSG00000109674	nei like DNA glycosylase 3 [Source:HGNC Symbol;Acc:HGNC:24573]	chr4	177309874	177362936	1	q34.3	NEIL3	37.32	protein_coding	2914
0.0031072	0.857	4.05	2.89	1.4	232297_at	ENSG00000109790	kelch like family member 5 [Source:HGNC Symbol;Acc:HGNC:6356]	chr4	39045039	39126857	1	p14	KLHL5	36.93	protein_coding	9168
0.0001278	0.857	4.18	6.73	0.62	239436_at	ENSG00000110172	cysteine and histidine rich domain containing 1 [Source:HGNC Symbol;Acc:HGNC:14525]	chr11	90200429	90223077	-1	q14.3	CHORDC1	35.44	protein_coding	11099
0.0052475	0.857	24.93	18.76	1.33	231885_at	ENSG00000112200	zinc finger protein 451 [Source:HGNC Symbol;Acc:HGNC:21091]	chr6	57086844	57170305	1	p12.1	ZNF451	36.73	protein_coding	16414
0.0044987	0.857	27.71	21.47	1.29	205231_s_at	ENSG00000112425	EPM2A glucan phosphatase, laforin [Source:HGNC Symbol;Acc:HGNC:3413]	chr6	145382535	145736023	-1	q24.3	EPM2A	37.55	protein_coding	18282
0.0029219	0.857	13.3	22.53	0.59	202202_s_at	ENSG00000112769	laminin subunit alpha 4 [Source:HGNC Symbol;Acc:HGNC:6484]	chr6	112107931	112254939	-1	q21	LAMA4	39.12	protein_coding	11983
0.0061412	0.857	20.52	13.39	1.53	227803_at	ENSG00000112796	ectonucleotide pyrophosphatase/phosphodiesterase family member 5 [Source:HGNC Symbol;Acc:HGNC:13717]	chr6	46159185	46170980	-1	p21.1	ENPP5	38.41	protein_coding	4275
0.0059885	0.857	124.77	239.55	0.52	200665_s_at	ENSG00000113140	secreted protein acidic and cysteine rich [Source:HGNC Symbol;Acc:HGNC:11219]	chr5	151661096	151686975	-1	q33.1	SPARC	47.82	protein_coding	4641
0.0092597	0.857	12.5	16.32	0.77	229260_at	ENSG00000113583	chromosome 5 open reading frame 15 [Source:HGNC Symbol;Acc:HGNC:20656]	chr5	133955510	133968674	-1	q31.1	C5orf15	39.76	protein_coding	2301
0.0011979	0.857	13.47	19.76	0.68	216131_at	ENSG00000114541	FERM domain containing 4B [Source:HGNC Symbol;Acc:HGNC:24886]	chr3	69168782	69542583	-1	p14.1	FRMD4B	41.41	protein_coding	11201
0.0070414	0.857	19.53	14.93	1.31	205019_s_at	ENSG00000114812	vasoactive intestinal peptide receptor 1 [Source:HGNC Symbol;Acc:HGNC:12694]	chr3	42489299	42537573	1	p22.1	VIPR1	52.67	protein_coding	7384
0.0073529	0.857	3.22	5.9	0.55	214702_at	ENSG00000115414	fibronectin 1 [Source:HGNC Symbol;Acc:HGNC:3778]	chr2	215360440	215436073	-1	q35	FN1	39.39	protein_coding	17216
0.0009449	0.857	34.01	75.78	0.45	1558199_at	ENSG00000115414	fibronectin 1 [Source:HGNC Symbol;Acc:HGNC:3778]	chr2	215360440	215436073	-1	q35	FN1	39.39	protein_coding	17216
0.0084746	0.857	4.45	5.86	0.76	211427_s_at	ENSG00000115474	potassium inwardly rectifying channel subfamily J member 13 [Source:HGNC Symbol;Acc:HGNC:6259]	chr2	232765802	232776565	-1	q37.1	KCNJ13	35.62	protein_coding	3636
0.0056497	0.857	66.83	97.49	0.69	221767_x_at	ENSG00000115677	high density lipoprotein binding protein [Source:HGNC Symbol;Acc:HGNC:4857]	chr2	241227264	241317061	-1	q37.3	HDLBP	46.99	protein_coding	12160
0.0054969	0.857	33.27	53.68	0.62	211186_s_at	ENSG00000115977	AP2 associated kinase 1 [Source:HGNC Symbol;Acc:HGNC:19679]	chr2	69457997	69674349	-1	p13.3	AAK1	41.95	protein_coding	24843
0.0098269	0.857	4.04	3.04	1.33	1556919_at	ENSG00000116678	leptin receptor [Source:HGNC Symbol;Acc:HGNC:6554]	chr1	65420652	65641559	1	p31.3	LEPR	37.78	protein_coding	11370
0.0045702	0.857	41.78	68.53	0.61	204363_at	ENSG00000117525	coagulation factor III, tissue factor [Source:HGNC Symbol;Acc:HGNC:3541]	chr1	94529173	94541759	-1	p21.3	F3	43.36	protein_coding	2886
0.0094601	0.857	31.08	47.55	0.65	209006_s_at	ENSG00000117616	arginine and serine rich protein 1 [Source:HGNC Symbol;Acc:HGNC:25234]	chr1	25242249	25338213	-1	p36.11	RSRP1	46.4	protein_coding	6730
0.0088106	0.857	30.35	39.59	0.77	212111_at	ENSG00000117758	syntaxin 12 [Source:HGNC Symbol;Acc:HGNC:11430]	chr1	27773219	27824443	1	p35.3	STX12	41.39	protein_coding	3801
0.0097374	0.857	3.83	2.78	1.38	220129_at	ENSG00000120669	spermatogenesis and oogenesis specific basic helix-loop-helix 2 [Source:HGNC Symbol;Acc:HGNC:26026]	chr13	36168217	36214588	-1	q13.3	SOHLH2	37.68	protein_coding	3363
0.0058487	0.857	32.76	24.42	1.34	202709_at	ENSG00000122176	fibromodulin [Source:HGNC Symbol;Acc:HGNC:3774]	chr1	203340628	203351758	-1	q32.1	FMOD	50.22	protein_coding	3034
0.0015012	0.857	25.66	45.64	0.56	205479_s_at	ENSG00000122861	plasminogen activator, urokinase [Source:HGNC Symbol;Acc:HGNC:9052]	chr10	73909177	73917496	1	q22.2	PLAU	53.5	protein_coding	2949
0.0071365	0.857	24.61	33.49	0.73	209062_x_at	ENSG00000124151	nuclear receptor coactivator 3 [Source:HGNC Symbol;Acc:HGNC:7670]	chr20	47501887	47656877	1	q13.12	NCOA3	41.15	protein_coding	8417
0.0007041	0.857	42.89	95.81	0.45	214827_at	ENSG00000124171	par-6 family cell polarity regulator beta [Source:HGNC Symbol;Acc:HGNC:16245]	chr20	50731580	50756795	1	q13.13	PARD6B	41.04	protein_coding	4690
0.0077145	0.857	14.27	22.29	0.64	222518_at	ENSG00000124198	ADP ribosylation factor guanine nucleotide exchange factor 2 [Source:HGNC Symbol;Acc:HGNC:15853]	chr20	48921711	49036693	1	q13.13	ARFGEF2	43.25	protein_coding	12446
0.0082052	0.857	30.62	43.48	0.7	223440_at	ENSG00000125149	chromosome 16 open reading frame 70 [Source:HGNC Symbol;Acc:HGNC:29564]	chr16	67109941	67148544	1	q22.1	C16orf70	47.87	protein_coding	5987
0.0017604	0.857	16.35	24.75	0.66	210932_s_at	ENSG00000127870	ring finger protein 6 [Source:HGNC Symbol;Acc:HGNC:10069]	chr13	26132115	26222314	-1	q12.13	RNF6	40.13	protein_coding	4442
0.0032403	0.857	12.72	18.39	0.69	205157_s_at	ENSG00000128422	keratin 17 [Source:HGNC Symbol;Acc:HGNC:6427]	chr17	41619442	41624842	-1	q21.2	KRT17	58.67	protein_coding	2996
0.0041737	0.857	85.95	143	0.6	214845_s_at	ENSG00000128595	calumenin [Source:HGNC Symbol;Acc:HGNC:1458]	chr7	128739292	128773400	1	q32.1	CALU	39.93	protein_coding	6342
0.0002301	0.857	65.32	111.6	0.59	200756_x_at	ENSG00000128595	calumenin [Source:HGNC Symbol;Acc:HGNC:1458]	chr7	128739292	128773400	1	q32.1	CALU	39.93	protein_coding	6342
0.0051892	0.857	27.02	43.21	0.63	207571_x_at	ENSG00000130775	thymocyte selection associated family member 2 [Source:HGNC Symbol;Acc:HGNC:16839]	chr1	27872543	27886685	1	p35.3	THEMIS2	54.04	protein_coding	4621
0.0019569	0.857	16.57	11.4	1.45	222843_at	ENSG00000132436	fidgetin like 1 [Source:HGNC Symbol;Acc:HGNC:13286]	chr7	50444128	50542535	-1	p12.1	FIGNL1	43.84	protein_coding	5034
0.0085252	0.857	37.82	63.56	0.6	209684_at	ENSG00000132669	Ras and Rab interactor 2 [Source:HGNC Symbol;Acc:HGNC:18750]	chr20	19757606	20002457	1	p11.23	RIN2	44.28	protein_coding	8271
0.0061382	0.857	7.67	10.89	0.7	206744_s_at	ENSG00000132950	zinc finger MYM-type containing 5 [Source:HGNC Symbol;Acc:HGNC:13029]	chr13	19823482	19863649	-1	q12.11	ZMYM5	42.62	protein_coding	3726
0.0098642	0.857	6.45	13.79	0.47	1555778_a_at	ENSG00000133110	periostin [Source:HGNC Symbol;Acc:HGNC:16953]	chr13	37562583	37598844	-1	q13.3	POSTN	32.94	protein_coding	5464
0.009723	0.857	24.82	41.03	0.6	212472_at	ENSG00000133816	microtubule associated monooxygenase, calponin and LIM domain containing 2 [Source:HGNC Symbol;Acc:HGNC:24693]	chr11	12094008	12359144	1	p15.3	MICAL2	45.98	protein_coding	20192
0.0020442	0.857	33.2	63.92	0.52	201169_s_at	ENSG00000134107	basic helix-loop-helix family member e40 [Source:HGNC Symbol;Acc:HGNC:1046]	chr3	4979437	4985323	1	p26.1	BHLHE40	47.72	protein_coding	3516
0.0087687	0.857	28.29	48.2	0.59	237891_at	ENSG00000135679	MDM2 proto-oncogene [Source:HGNC Symbol;Acc:HGNC:6973]	chr12	68808177	68845544	1	q15	MDM2	39.04	protein_coding	8306
0.0043488	0.857	74.71	125.48	0.6	200770_s_at	ENSG00000135862	laminin subunit gamma 1 [Source:HGNC Symbol;Acc:HGNC:6492]	chr1	183023420	183145592	1	q25.3	LAMC1	40.09	protein_coding	8446
0.0029612	0.857	73.1	151.83	0.48	217732_s_at	ENSG00000136156	integral membrane protein 2B [Source:HGNC Symbol;Acc:HGNC:6174]	chr13	48232612	48270357	1	q14.2	ITM2B	37.65	protein_coding	10661
0.0052683	0.857	20.65	15.28	1.35	218666_s_at	ENSG00000136874	syntaxin 17 [Source:HGNC Symbol;Acc:HGNC:11432]	chr9	99906654	99974534	1	q31.1	STX17	36.39	protein_coding	8912
0.0061221	0.857	5.02	3.99	1.26	222577_at	ENSG00000137500	coiled-coil domain containing 90B [Source:HGNC Symbol;Acc:HGNC:28108]	chr11	83259097	83286407	-1	q14.1	CCDC90B	37.59	protein_coding	6561
0.008396	0.857	32.99	44.48	0.74	218960_at	ENSG00000137648	transmembrane serine protease 4 [Source:HGNC Symbol;Acc:HGNC:11878]	chr11	118077012	118121890	1	q23.3	TMPRSS4	48.55	protein_coding	9948
0.006409	0.857	5.66	4.18	1.35	1563475_s_at	ENSG00000139160	electron transfer flavoprotein subunit beta lysine methyltransferase [Source:HGNC Symbol;Acc:HGNC:28739]	chr12	31647160	31673114	1	p11.21	ETFBKMT	42.44	protein_coding	6868
0.0090113	0.857	181.5	240.58	0.75	217756_x_at	ENSG00000140264	small EDRK-rich factor 2 [Source:HGNC Symbol;Acc:HGNC:10757]	chr15	43777087	43804427	1	q15.3	SERF2	49.05	protein_coding	9185
0.0021725	0.857	32.2	51.76	0.62	211012_s_at	ENSG00000140464	PML nuclear body scaffold [Source:HGNC Symbol;Acc:HGNC:9113]	chr15	73994673	74047827	1	q24.1	PML	47.81	protein_coding	12672
0.0065962	0.857	10.05	13.47	0.75	65438_at	ENSG00000140950	MTOR associated protein, eak-7 homolog [Source:HGNC Symbol;Acc:HGNC:29325]	chr16	84476355	84554033	-1	q24.1	MEAK7	49.63	protein_coding	8157
0.0075259	0.857	6.62	5.1	1.3	219325_s_at	ENSG00000141642	elaC ribonuclease Z 1 [Source:HGNC Symbol;Acc:HGNC:14197]	chr18	50967991	50988121	1	q21.2	ELAC1	41.78	protein_coding	3970
0.0035866	0.857	16.49	22.41	0.74	216904_at	ENSG00000142156	collagen type VI alpha 1 chain [Source:HGNC Symbol;Acc:HGNC:2211]	chr21	45981770	46005050	1	q22.3	COL6A1	64.66	protein_coding	5536
0.0087638	0.857	9.2	13.77	0.67	1557258_a_at	ENSG00000142867	BCL10 immune signaling adaptor [Source:HGNC Symbol;Acc:HGNC:989]	chr1	85265776	85276632	-1	p22.3	BCL10	39.27	protein_coding	4346
0.0031675	0.857	37.3	63.96	0.58	226071_at	ENSG00000143382	ADAMTS like 4 [Source:HGNC Symbol;Acc:HGNC:19706]	chr1	150549369	150560937	1	q21.2	ADAMTSL4	60.13	protein_coding	6432
0.0045236	0.857	8.09	13.58	0.6	223821_s_at	ENSG00000143502	sushi domain containing 4 [Source:HGNC Symbol;Acc:HGNC:25470]	chr1	223220819	223364233	-1	q41	SUSD4	44.24	protein_coding	5336
0.0009971	0.857	21.71	41.77	0.52	223822_at	ENSG00000143502	sushi domain containing 4 [Source:HGNC Symbol;Acc:HGNC:25470]	chr1	223220819	223364233	-1	q41	SUSD4	44.24	protein_coding	5336
0.0035315	0.857	13.71	25.52	0.54	219389_at	ENSG00000143502	sushi domain containing 4 [Source:HGNC Symbol;Acc:HGNC:25470]	chr1	223220819	223364233	-1	q41	SUSD4	44.24	protein_coding	5336
0.0027012	0.857	14.32	10.13	1.41	236104_at	ENSG00000143889	heterogeneous nuclear ribonucleoprotein L like [Source:HGNC Symbol;Acc:HGNC:25127]	chr2	38561969	38603586	-1	p22.1	HNRNPLL	37.07	protein_coding	5932
0.008392	0.857	3.5	2.7	1.29	230060_at	ENSG00000144354	cell division cycle associated 7 [Source:HGNC Symbol;Acc:HGNC:14628]	chr2	173354820	173368997	1	q31.1	CDCA7	43.24	protein_coding	3934
0.0095336	0.857	39.95	55.17	0.72	202655_at	ENSG00000145050	mesencephalic astrocyte derived neurotrophic factor [Source:HGNC Symbol;Acc:HGNC:15461]	chr3	51385291	51389397	1	p21.2	MANF	50.89	protein_coding	2139
0.0076006	0.857	18.91	41.25	0.46	217109_at	ENSG00000145113	mucin 4, cell surface associated [Source:HGNC Symbol;Acc:HGNC:7514]	chr3	195746765	195811973	-1	q29	MUC4	53.71	protein_coding	21021
0.0049521	0.857	177.7	404.67	0.44	235055_x_at	ENSG00000145113	mucin 4, cell surface associated [Source:HGNC Symbol;Acc:HGNC:7514]	chr3	195746765	195811973	-1	q29	MUC4	53.71	protein_coding	21021
0.0093248	0.857	8.91	14.22	0.63	218989_x_at	ENSG00000145740	solute carrier family 30 member 5 [Source:HGNC Symbol;Acc:HGNC:19089]	chr5	69093949	69131069	1	q13.1	SLC30A5	39.23	protein_coding	5481
0.0045456	0.857	20.55	28.26	0.73	206408_at	ENSG00000146006	leucine rich repeat transmembrane neuronal 2 [Source:HGNC Symbol;Acc:HGNC:19409]	chr5	138868921	138875368	-1	q31.2	LRRTM2	38.26	protein_coding	6097
0.0016141	0.857	16.91	26.64	0.63	243047_at	ENSG00000146067	family with sequence similarity 193 member B [Source:HGNC Symbol;Acc:HGNC:25524]	chr5	177519789	177554563	-1	q35.3	FAM193B	49.93	protein_coding	5825
0.008334	0.857	6.95	5.09	1.36	235540_at	ENSG00000147437	gonadotropin releasing hormone 1 [Source:HGNC Symbol;Acc:HGNC:4419]	chr8	25419258	25424654	-1	p21.2	GNRH1	39.76	protein_coding	1764
0.0066136	0.857	8.04	6.02	1.34	219979_s_at	ENSG00000149196	heat shock protein nuclear import factor hikeshi [Source:HGNC Symbol;Acc:HGNC:26938]	chr11	86302211	86345943	1	q14.2	HIKESHI	37.86	protein_coding	3433
0.007438	0.857	22.35	35.17	0.64	212573_at	ENSG00000149218	endonuclease domain containing 1 [Source:HGNC Symbol;Acc:HGNC:29129]	chr11	95089846	95132645	1	q21	ENDOD1	42.67	protein_coding	4651
0.0046711	0.857	55.9	83.36	0.67	212570_at	ENSG00000149218	endonuclease domain containing 1 [Source:HGNC Symbol;Acc:HGNC:29129]	chr11	95089846	95132645	1	q21	ENDOD1	42.67	protein_coding	4651
0.0087792	0.857	15.81	22.4	0.71	223380_s_at	ENSG00000150457	large tumor suppressor kinase 2 [Source:HGNC Symbol;Acc:HGNC:6515]	chr13	20973036	21061586	-1	q12.11	LATS2	45.68	protein_coding	5613
0.0021768	0.857	3.48	4.9	0.71	201963_at	ENSG00000151726	acyl-CoA synthetase long chain family member 1 [Source:HGNC Symbol;Acc:HGNC:3569]	chr4	184755595	184826818	-1	q35.1	ACSL1	44.71	protein_coding	6134
0.0086824	0.857	24.03	46.5	0.52	37079_at	ENSG00000153989	NUS1 dehydrodolichyl diphosphate synthase subunit [Source:HGNC Symbol;Acc:HGNC:21042]	chr6	117675469	117710727	1	q22.1	NUS1	37.38	protein_coding	4796
0.0024263	0.857	9.97	6.94	1.44	227589_at	ENSG00000154217	phosphatidylinositol transfer protein cytoplasmic 1 [Source:HGNC Symbol;Acc:HGNC:21045]	chr17	67377281	67697261	1	q24.2	PITPNC1	44.62	protein_coding	7819
0.0076666	0.857	11.43	8.26	1.38	226303_at	ENSG00000154330	phosphoglucomutase 5 [Source:HGNC Symbol;Acc:HGNC:8908]	chr9	68328308	68531061	1	q21.11	PGM5	40.29	protein_coding	7714
0.0031147	0.857	32.07	42.19	0.76	210248_at	ENSG00000154764	Wnt family member 7A [Source:HGNC Symbol;Acc:HGNC:12786]	chr3	13816258	13880071	-1	p25.1	WNT7A	51.83	protein_coding	4529
0.0082541	0.857	27.08	37.94	0.71	215645_at	ENSG00000154803	folliculin [Source:HGNC Symbol;Acc:HGNC:27310]	chr17	17212212	17237188	-1	p11.2	FLCN	53.29	protein_coding	9786
0.003826	0.857	23.8	37.82	0.63	1562378_s_at	ENSG00000155066	prominin 2 [Source:HGNC Symbol;Acc:HGNC:20685]	chr2	95274449	95291308	1	q11.1	PROM2	58.87	protein_coding	6067
0.0070966	0.857	9.43	13.87	0.68	215134_at	ENSG00000155252	phosphatidylinositol 4-kinase type 2 alpha [Source:HGNC Symbol;Acc:HGNC:30031]	chr10	97640686	97676434	1	q24.2	PI4K2A	44.74	protein_coding	4189
0.0005052	0.857	39.69	55.81	0.71	223095_at	ENSG00000155254	MARVEL domain containing 1 [Source:HGNC Symbol;Acc:HGNC:28674]	chr10	97713173	97718150	1	q24.2	MARVELD1	57.63	protein_coding	3371
0.0024047	0.857	7.63	5.27	1.45	234071_at	ENSG00000155792	DEP domain containing MTOR interacting protein [Source:HGNC Symbol;Acc:HGNC:22953]	chr8	119873717	120050918	1	q24.12	DEPTOR	43.18	protein_coding	2627
0.0013581	0.857	10.39	7.42	1.4	213135_at	ENSG00000156299	TIAM Rac1 associated GEF 1 [Source:HGNC Symbol;Acc:HGNC:11805]	chr21	31118416	31559977	-1	q22.11	TIAM1	43.86	protein_coding	9216
0.0098774	0.857	4.95	3.91	1.27	244293_at	ENSG00000156467	ubiquinol-cytochrome c reductase binding protein [Source:HGNC Symbol;Acc:HGNC:12582]	chr8	96222947	96235546	-1	q22.1	UQCRB	38.71	protein_coding	12600
0.0078524	0.857	3.51	2.76	1.27	1552439_s_at	ENSG00000157890	multiple EGF like domains 11 [Source:HGNC Symbol;Acc:HGNC:29635]	chr15	65895079	66253750	-1	q22.31	MEGF11	48.98	protein_coding	9831
0.0074537	0.857	38.02	30.04	1.27	220643_s_at	ENSG00000158234	Fas apoptotic inhibitory molecule [Source:HGNC Symbol;Acc:HGNC:18703]	chr3	138608606	138633376	1	q22.3	FAIM	40.46	protein_coding	4072
0.001598	0.857	14.36	11	1.31	243364_at	ENSG00000158321	activator of transcription and developmental regulator AUTS2 [Source:HGNC Symbol;Acc:HGNC:14262]	chr7	69598296	70793506	1	q11.22	AUTS2	41.07	protein_coding	24887
0.0043153	0.857	13.1	9.63	1.36	1555033_a_at	ENSG00000159788	regulator of G protein signaling 12 [Source:HGNC Symbol;Acc:HGNC:9994]	chr4	3293028	3439913	1	p16.3	RGS12	50.96	protein_coding	13755
0.0028963	0.857	10.46	7.73	1.35	206186_at	ENSG00000161647	membrane palmitoylated protein 3 [Source:HGNC Symbol;Acc:HGNC:7221]	chr17	43800799	43833170	-1	q21.31	MPP3	48.95	protein_coding	4491
0.0089298	0.857	6.6	9.39	0.7	212230_at	ENSG00000162407	phospholipid phosphatase 3 [Source:HGNC Symbol;Acc:HGNC:9229]	chr1	56494761	56645301	-1	p32.2	PLPP3	41.42	protein_coding	5272
0.0043836	0.857	8.66	6.41	1.35	241825_at	ENSG00000162971	tRNA-yW synthesizing protein 5 [Source:HGNC Symbol;Acc:HGNC:26754]	chr2	199928913	199955736	-1	q33.1	TYW5	37.41	protein_coding	11558
0.0031018	0.857	12.83	9.98	1.29	1554342_s_at	ENSG00000163312	helicase, POLQ like [Source:HGNC Symbol;Acc:HGNC:18536]	chr4	83407343	83455855	-1	q21.23	HELQ	38.46	protein_coding	3712
0.0084421	0.857	48.56	89.38	0.54	1555827_at	ENSG00000163660	cyclin L1 [Source:HGNC Symbol;Acc:HGNC:20569]	chr3	157146508	157160760	-1	q25.31	CCNL1	37.3	protein_coding	8729
0.0071854	0.857	28.6	21.72	1.32	228090_at	ENSG00000163864	nicotinamide nucleotide adenylyltransferase 3 [Source:HGNC Symbol;Acc:HGNC:20989]	chr3	139560180	139678017	-1	q23	NMNAT3	41.66	protein_coding	12983
0.0056379	0.857	11.79	17.52	0.67	208999_at	ENSG00000164402	septin 8 [Source:HGNC Symbol;Acc:HGNC:16511]	chr5	132750819	132807241	-1	q31.1	SEPTIN8	48.12	protein_coding	7709
0.0065629	0.857	9.67	17.39	0.56	226930_at	ENSG00000164694	fibronectin type III domain containing 1 [Source:HGNC Symbol;Acc:HGNC:21184]	chr6	159169400	159272108	1	q25.3	FNDC1	43.39	protein_coding	6850
0.0062561	0.857	111.64	192.24	0.58	200838_at	ENSG00000164733	cathepsin B [Source:HGNC Symbol;Acc:HGNC:2527]	chr8	11842524	11869533	-1	p23.1	CTSB	52.18	protein_coding	10541
0.001138	0.857	19.79	26.59	0.74	223797_at	ENSG00000165006	ubiquitin associated protein 1 [Source:HGNC Symbol;Acc:HGNC:12461]	chr9	34179005	34252523	1	p13.3	UBAP1	42.8	protein_coding	2772
0.0009651	0.857	20.51	14.3	1.43	207540_s_at	ENSG00000165025	spleen associated tyrosine kinase [Source:HGNC Symbol;Acc:HGNC:11491]	chr9	90801787	90898549	1	q22.2	SYK	44.17	protein_coding	5210
0.003986	0.857	18.36	30.07	0.61	203504_s_at	ENSG00000165029	ATP binding cassette subfamily A member 1 [Source:HGNC Symbol;Acc:HGNC:29]	chr9	104781006	104928155	-1	q31.1	ABCA1	43.42	protein_coding	11343
0.0008434	0.857	10.11	18.82	0.54	229004_at	ENSG00000166106	ADAM metallopeptidase with thrombospondin type 1 motif 15 [Source:HGNC Symbol;Acc:HGNC:16305]	chr11	130448645	130476645	1	q24.3	ADAMTS15	51.86	protein_coding	6006
0.0008989	0.857	5.2	8.76	0.59	226834_at	ENSG00000166250	CXADR like membrane protein [Source:HGNC Symbol;Acc:HGNC:24039]	chr11	123069872	123195248	-1	q24.1	CLMP	45.03	protein_coding	5057
0.0070919	0.857	35.96	65.01	0.55	222101_s_at	ENSG00000166341	dachsous cadherin-related 1 [Source:HGNC Symbol;Acc:HGNC:13681]	chr11	6621330	6655809	-1	p15.4	DCHS1	52.61	protein_coding	10783
0.0096001	0.857	14.05	22.63	0.62	228450_at	ENSG00000166689	pleckstrin homology domain containing A7 [Source:HGNC Symbol;Acc:HGNC:27049]	chr11	16777297	17014414	-1	p15.1	PLEKHA7	46.37	protein_coding	10978
0.0091952	0.857	11.07	8.41	1.32	225614_at	ENSG00000166788	serum amyloid A like 1 [Source:HGNC Symbol;Acc:HGNC:25158]	chr11	18069935	18106087	-1	p15.1	SAAL1	39.76	protein_coding	3066
0.0098691	0.857	33.34	46.21	0.72	218284_at	ENSG00000166949	SMAD family member 3 [Source:HGNC Symbol;Acc:HGNC:6769]	chr15	67063763	67195173	1	q22.33	SMAD3	48.33	protein_coding	9981
0.0078703	0.857	9.15	6.92	1.32	228681_x_at	ENSG00000167657	death associated protein kinase 3 [Source:HGNC Symbol;Acc:HGNC:2676]	chr19	3958453	3971123	-1	p13.3	DAPK3	58.44	protein_coding	3549
0.0076836	0.857	9.57	7	1.37	222844_s_at	ENSG00000167720	serine racemase [Source:HGNC Symbol;Acc:HGNC:14398]	chr17	2303383	2325260	1	p13.3	SRR	45.63	protein_coding	3252
0.0068192	0.857	13.02	18.59	0.7	1556053_at	ENSG00000168259	DnaJ heat shock protein family (Hsp40) member C7 [Source:HGNC Symbol;Acc:HGNC:12392]	chr17	41976421	42021376	-1	q21.2	DNAJC7	45.79	protein_coding	12944
0.0060646	0.857	23.04	37.15	0.62	217762_s_at	ENSG00000168461	RAB31, member RAS oncogene family [Source:HGNC Symbol;Acc:HGNC:9771]	chr18	9708275	9862551	1	p11.22	RAB31	43.6	protein_coding	5476
0.0075449	0.857	19.83	27.76	0.71	217763_s_at	ENSG00000168461	RAB31, member RAS oncogene family [Source:HGNC Symbol;Acc:HGNC:9771]	chr18	9708275	9862551	1	p11.22	RAB31	43.6	protein_coding	5476
0.0022697	0.857	105.63	308.19	0.34	201852_x_at	ENSG00000168542	collagen type III alpha 1 chain [Source:HGNC Symbol;Acc:HGNC:2201]	chr2	188974373	189012746	1	q32.2	COL3A1	33.79	protein_coding	6758
0.0040359	0.857	72.88	193.97	0.38	215076_s_at	ENSG00000168542	collagen type III alpha 1 chain [Source:HGNC Symbol;Acc:HGNC:2201]	chr2	188974373	189012746	1	q32.2	COL3A1	33.79	protein_coding	6758
0.0015817	0.857	6.85	10.81	0.63	232458_at	ENSG00000168542	collagen type III alpha 1 chain [Source:HGNC Symbol;Acc:HGNC:2201]	chr2	188974373	189012746	1	q32.2	COL3A1	33.79	protein_coding	6758
0.007961	0.857	34.16	56.49	0.6	1570042_a_at	ENSG00000168615	ADAM metallopeptidase domain 9 [Source:HGNC Symbol;Acc:HGNC:216]	chr8	38996754	39105445	1	p11.22	ADAM9	37.5	protein_coding	17704
0.0096918	0.857	5.98	9.62	0.62	202381_at	ENSG00000168615	ADAM metallopeptidase domain 9 [Source:HGNC Symbol;Acc:HGNC:216]	chr8	38996754	39105445	1	p11.22	ADAM9	37.5	protein_coding	17704
0.0056653	0.857	30.2	22.51	1.34	238886_at	ENSG00000170348	transmembrane p24 trafficking protein 10 [Source:HGNC Symbol;Acc:HGNC:16998]	chr14	75131469	75176612	-1	q24.3	TMED10	42.19	protein_coding	4956
0.004279	0.857	8.6	6.33	1.36	219283_at	ENSG00000171155	C1GALT1 specific chaperone 1 [Source:HGNC Symbol;Acc:HGNC:24338]	chrX	120625674	120630054	-1	q24	C1GALT1C1	39.69	protein_coding	1808
0.00952	0.857	2.72	3.66	0.74	226225_at	ENSG00000171444	MCC regulator of WNT signaling pathway [Source:HGNC Symbol;Acc:HGNC:6935]	chr5	113022099	113488823	-1	q22.2	MCC	41.55	protein_coding	10739
0.0019358	0.857	5	3.28	1.52	229313_at	ENSG00000171714	anoctamin 5 [Source:HGNC Symbol;Acc:HGNC:27337]	chr11	21782659	22283567	1	p15.1	ANO5	36.43	protein_coding	19477
0.0024447	0.857	3.53	2.72	1.3	236917_at	ENSG00000171757	leucine rich repeat containing 34 [Source:HGNC Symbol;Acc:HGNC:28408]	chr3	169793003	169812986	-1	q26.2	LRRC34	38.9	protein_coding	5276
0.0037066	0.857	23.63	57.49	0.41	204777_s_at	ENSG00000172005	mal, T cell differentiation protein [Source:HGNC Symbol;Acc:HGNC:6817]	chr2	95025677	95053992	1	q11.1	MAL	52.06	protein_coding	1453
0.00741	0.857	4.58	3.54	1.29	220829_s_at	ENSG00000172318	beta-1,3-galactosyltransferase 1 [Source:HGNC Symbol;Acc:HGNC:916]	chr2	167868948	167874041	1	q24.3	B3GALT1	39.22	protein_coding	5094
0.0052052	0.857	10.02	14.58	0.69	1555240_s_at	ENSG00000172380	G protein subunit gamma 12 [Source:HGNC Symbol;Acc:HGNC:19663]	chr1	67701475	67833467	-1	p31.3	GNG12	41.55	protein_coding	4715
0.0017782	0.857	11.74	8.4	1.4	226989_at	ENSG00000174136	repulsive guidance molecule BMP co-receptor b [Source:HGNC Symbol;Acc:HGNC:26896]	chr5	98768650	98798643	1	q15	RGMB	43.29	protein_coding	6643
0.0089745	0.857	23.47	31.29	0.75	211043_s_at	ENSG00000175416	clathrin light chain B [Source:HGNC Symbol;Acc:HGNC:2091]	chr5	176392501	176416539	-1	q35.2	CLTB	53.08	protein_coding	1963
0.0035852	0.857	5.39	3.52	1.53	235740_at	ENSG00000175471	multiple C2 and transmembrane domain containing 1 [Source:HGNC Symbol;Acc:HGNC:26183]	chr5	94703741	95284575	-1	q15	MCTP1	37.29	protein_coding	12089
0.0086319	0.857	36.26	56.91	0.64	231941_s_at	ENSG00000176945	mucin 20, cell surface associated [Source:HGNC Symbol;Acc:HGNC:23282]	chr3	195720884	195741123	1	q29	MUC20	50.62	protein_coding	6837
0.0011076	0.857	26.71	40.23	0.66	226622_at	ENSG00000176945	mucin 20, cell surface associated [Source:HGNC Symbol;Acc:HGNC:23282]	chr3	195720884	195741123	1	q29	MUC20	50.62	protein_coding	6837
0.0058405	0.857	5.38	4.1	1.31	236376_at	ENSG00000177181	ribosomal modification protein rimK like family member A [Source:HGNC Symbol;Acc:HGNC:28725]	chr1	42380792	42424232	1	p34.2	RIMKLA	43.65	protein_coding	10638
0.001466	0.857	75.03	105.79	0.71	226722_at	ENSG00000177706	FAM20C golgi associated secretory pathway kinase [Source:HGNC Symbol;Acc:HGNC:22140]	chr7	192571	260772	1	p22.3	FAM20C	60	protein_coding	5054
0.0088788	0.857	23.66	35.57	0.67	1558430_at	ENSG00000179889	pyridoxal dependent decarboxylase domain containing 1 [Source:HGNC Symbol;Acc:HGNC:28995]	chr16	14974591	15139339	1	p13.11	PDXDC1	46.49	protein_coding	9410
0.0005832	0.857	5.11	3.47	1.47	235052_at	ENSG00000180884	zinc finger protein 792 [Source:HGNC Symbol;Acc:HGNC:24751]	chr19	34956354	34964229	-1	q13.11	ZNF792	51.69	protein_coding	4414
0.0040819	0.857	10.37	7.7	1.35	221823_at	ENSG00000181751	macrophage immunometabolism regulator [Source:HGNC Symbol;Acc:HGNC:25052]	chr5	103258763	103278660	1	q21.1	MACIR	37.42	protein_coding	3507
0.0018802	0.857	77.14	127.28	0.61	242123_at	ENSG00000182749	progestin and adipoQ receptor family member 7 [Source:HGNC Symbol;Acc:HGNC:23146]	chr1	25861484	25875708	-1	p36.11	PAQR7	52.5	protein_coding	3244
0.004347	0.857	18.13	27.52	0.66	228865_at	ENSG00000182795	chromosome 1 open reading frame 116 [Source:HGNC Symbol;Acc:HGNC:28667]	chr1	207018522	207032756	-1	q32.1	C1orf116	47.45	protein_coding	5501
0.0018868	0.857	10.15	7.33	1.38	226838_at	ENSG00000183891	tetratricopeptide repeat domain 32 [Source:HGNC Symbol;Acc:HGNC:32954]	chr2	19896631	19901983	-1	p24.1	TTC32	39.38	protein_coding	1995
0.0080092	0.857	7.31	5.66	1.29	239749_at	ENSG00000185104	Fas associated factor 1 [Source:HGNC Symbol;Acc:HGNC:3578]	chr1	50437028	50960267	-1	p32.3	FAF1	38.27	protein_coding	7549
0.0037274	0.857	54.71	95.44	0.57	211965_at	ENSG00000185650	ZFP36 ring finger protein like 1 [Source:HGNC Symbol;Acc:HGNC:1107]	chr14	68787660	68796253	-1	q24.1	ZFP36L1	53.26	protein_coding	5160
0.0033908	0.857	5.73	7.94	0.72	1553668_at	ENSG00000186001	leucine rich repeats and calponin homology domain containing 3 [Source:HGNC Symbol;Acc:HGNC:28637]	chr3	197791226	197888436	1	q29	LRCH3	40.91	protein_coding	12639
0.0083541	0.857	5.73	3.69	1.55	216999_at	ENSG00000187266	erythropoietin receptor [Source:HGNC Symbol;Acc:HGNC:3416]	chr19	11377207	11384342	-1	p13.2	EPOR	57.06	protein_coding	3077
0.0063797	0.857	80.22	141.14	0.57	220983_s_at	ENSG00000187678	sprouty RTK signaling antagonist 4 [Source:HGNC Symbol;Acc:HGNC:15533]	chr5	142310427	142326455	-1	q31.3	SPRY4	51.21	protein_coding	6555
0.0036137	0.857	4.83	10.05	0.48	1555817_s_at	ENSG00000187720	thrombospondin type 1 domain containing 4 [Source:HGNC Symbol;Acc:HGNC:25835]	chr15	71096952	71783383	1	q23	THSD4	42.5	protein_coding	15837
0.0048492	0.857	20.76	42.89	0.48	219153_s_at	ENSG00000187720	thrombospondin type 1 domain containing 4 [Source:HGNC Symbol;Acc:HGNC:25835]	chr15	71096952	71783383	1	q23	THSD4	42.5	protein_coding	15837
0.0055966	0.857	19.78	14.39	1.37	231971_at	ENSG00000187790	FA complementation group M [Source:HGNC Symbol;Acc:HGNC:23168]	chr14	45135930	45200890	1	q21.2	FANCM	37.51	protein_coding	8478
0.0032212	0.857	5.12	3.89	1.32	235043_at	ENSG00000187866	PP2A Aalpha (PPP2R1A) and B55A (PPP2R2A) interacting phosphatase regulator 1 [Source:HGNC Symbol;Acc:HGNC:23490]	chr9	68780065	68785566	1	q21.11	PABIR1	40.6	protein_coding	5502
0.0098668	0.857	8.9	6.97	1.28	244861_at	ENSG00000189164	zinc finger protein 527 [Source:HGNC Symbol;Acc:HGNC:29385]	chr19	37371061	37393066	1	q13.12	ZNF527	40.73	protein_coding	6436
0.0039793	0.857	11.62	22.43	0.52	203139_at	ENSG00000196730	death associated protein kinase 1 [Source:HGNC Symbol;Acc:HGNC:2674]	chr9	87497228	87708634	1	q21.33	DAPK1	45.13	protein_coding	8908
0.0083792	0.857	22.91	40.03	0.57	204268_at	ENSG00000196754	S100 calcium binding protein A2 [Source:HGNC Symbol;Acc:HGNC:10492]	chr1	153561108	153567890	-1	q21.3	S100A2	53.99	protein_coding	1546
0.0040119	0.857	24.25	39.76	0.61	233888_s_at	ENSG00000196935	SLIT-ROBO Rho GTPase activating protein 1 [Source:HGNC Symbol;Acc:HGNC:17382]	chr12	63844700	64162217	1	q14.2	SRGAP1	39.42	protein_coding	26230
0.0009442	0.857	45.46	84.49	0.54	200872_at	ENSG00000197747	S100 calcium binding protein A10 [Source:HGNC Symbol;Acc:HGNC:10487]	chr1	151982915	151993859	-1	q21.3	S100A10	44.94	protein_coding	1012
0.0071903	0.857	20.05	34.85	0.58	235868_at	ENSG00000198408	O-GlcNAcase [Source:HGNC Symbol;Acc:HGNC:7056]	chr10	101784443	101818465	-1	q24.32	OGA	41.92	protein_coding	7247
0.0098842	0.857	57.84	87.41	0.66	210524_x_at	ENSG00000198417	metallothionein 1F [Source:HGNC Symbol;Acc:HGNC:7398]	chr16	56657731	56660698	1	q13	MT1F	51.79	protein_coding	1852
0.002169	0.857	4.41	3.18	1.39	214044_at	ENSG00000198626	ryanodine receptor 2 [Source:HGNC Symbol;Acc:HGNC:10484]	chr1	237042184	237833988	1	q43	RYR2	38.53	protein_coding	17855
0.0034639	0.857	7.67	13.58	0.56	1566340_at	ENSG00000200785	small nucleolar RNA, C/D box 8 [Source:HGNC Symbol;Acc:HGNC:20159]	chr14	21397292	21397401	-1	q11.2	SNORD8	50	snoRNA	110
0.0025064	0.857	3.77	4.93	0.76	219957_at	ENSG00000204130	RUN and FYVE domain containing 2 [Source:HGNC Symbol;Acc:HGNC:19761]	chr10	68341107	68407294	-1	q21.3	RUFY2	40.87	protein_coding	8137
0.007587	0.857	85.62	62.06	1.38	206747_at	ENSG00000204175	G protein regulated inducer of neurite outgrowth 2 [Source:HGNC Symbol;Acc:HGNC:23730]	chr10	46549044	46555530	-1	q11.22	GPRIN2	57.21	protein_coding	1968
0.0060104	0.857	10.71	21.67	0.49	221729_at	ENSG00000204262	collagen type V alpha 2 chain [Source:HGNC Symbol;Acc:HGNC:2210]	chr2	189031898	189225312	-1	q32.2	COL5A2	34.93	protein_coding	7319
0.0073733	0.857	5.02	3.4	1.48	207523_at	ENSG00000204296	testis expressed basic protein 1 [Source:HGNC Symbol;Acc:HGNC:13922]	chr6	32288526	32371912	-1	p21.32	TSBP1	38.14	protein_coding	2445
0.0072838	0.857	4.67	3.47	1.35	239434_at	ENSG00000213066	centrosomal protein 43 [Source:HGNC Symbol;Acc:HGNC:17012]	chr6	166999317	167094789	1	q27	CEP43	40.97	protein_coding	15886
0.0025515	0.857	6.63	9.33	0.71	1559060_a_at	ENSG00000217128	folliculin interacting protein 1 [Source:HGNC Symbol;Acc:HGNC:29418]	chr5	131641714	131797063	-1	q31.1	FNIP1	37.77	protein_coding	7942
0.0007837	0.857	7.22	5.23	1.38	236282_at	ENSG00000224046	novel transcript, antisense to DMTF1	chr7	87151422	87152420	-1	q21.12		47.85	lncRNA	908
0.000521	0.857	7.56	5.37	1.41	227124_at	ENSG00000224531	small integral membrane protein 13 [Source:HGNC Symbol;Acc:HGNC:27356]	chr6	11093834	11138733	1	p24.2	SMIM13	42.31	protein_coding	4887
0.002196	0.857	10.06	6.82	1.47	1561004_at	ENSG00000237943	PRKCQ antisense RNA 1 [Source:HGNC Symbol;Acc:HGNC:44689]	chr10	6580419	6616921	1	p15.1	PRKCQ-AS1	40.55	lncRNA	5834
0.0046999	0.857	5.91	4.46	1.32	1562682_at	ENSG00000245534	RORA antisense RNA 1 [Source:HGNC Symbol;Acc:HGNC:51410]	chr15	60479152	60630637	1	q22.2	RORA-AS1	40.19	lncRNA	2143
0.0095424	0.857	3.16	2.45	1.29	236523_at	ENSG00000248713	chromosome 4 open reading frame 54 [Source:HGNC Symbol;Acc:HGNC:27741]	chr4	99636529	99657828	-1	q23	C4orf54	43.02	protein_coding	10451
0.0083038	0.857	4.42	3.54	1.25	1570226_at	ENSG00000250365	novel transcript, antisense to C14orf126	chr14	31420286	31452883	1	q12		39.7	lncRNA	3752
0.0077378	0.857	8.13	10.56	0.77	214696_at	ENSG00000250365	novel transcript, antisense to C14orf126	chr14	31420286	31452883	1	q12		39.7	lncRNA	3752
0.0073838	0.857	13.83	20.94	0.66	227862_at	ENSG00000253368	TMF1 regulated nuclear protein 1 [Source:HGNC Symbol;Acc:HGNC:34348]	chr1	26993692	27000886	1	p36.11	TRNP1	55.83	protein_coding	1979
0.00319	0.857	3.35	2.57	1.3	1562520_at	ENSG00000255087	novel transcript	chr11	127021736	127172363	1	q24.2		41.75	lncRNA	12587
0.0095636	0.857	33.79	46.25	0.73	203074_at	ENSG00000264230	annexin A8 like 1 [Source:HGNC Symbol;Acc:HGNC:23334]	chr10	46375627	46391784	1	q11.22	ANXA8L1	54.03	protein_coding	2860
0.004613	0.857	5.17	3.68	1.4	1554759_at	ENSG00000277363	SRC kinase signaling inhibitor 1 [Source:HGNC Symbol;Acc:HGNC:29506]	chr17	38530031	38605952	-1	q12	SRCIN1	56.67	protein_coding	11665
0.0066911	0.857	4.71	3.65	1.29	1553435_at	ENSG00000279020	chromosome 18 putative open reading frame 15 [Source:HGNC Symbol;Acc:HGNC:26447]	chr18	13239543	13242076	1	p11.21	C18orf15	54.7	TEC	2534
0.0090274	0.857	163.13	355.77	0.46	211458_s_at	ENSG00000279980	GABA type A receptor associated protein like 3 pseudogene [Source:NCBI gene (formerly Entrezgene);Acc:23766]	chr15	90347587	90349437	1	q26.1	GABARAPL3	49	TEC	1851
0.0065698	0.857	79.37	182.47	0.44	207276_at	ENSG00000288642	cerebellar degeneration related protein 1 [Source:HGNC Symbol;Acc:HGNC:1798]	chrX	140783578	140784366	-1	q27.1	CDR1	44.11	protein_coding	789
0.0074302	0.857	33.97	47.12	0.72	1558504_at	ENSG00000291202	Novel transcript	chr4	119405523	119454655	-1				lncRNA
0.000777	0.857	27.42	76.93	0.36	215078_at	ENSG00000291237	superoxide dismutase 2	chr6	159669069	159762529	-1		SOD2		protein_coding
