# Supplementary material for: Identification of lncRNAs Deregulated in Epithelial Ovarian Cancer Based on a Gene Expression Profiling Meta-Analysis
Source: Int J Mol Sci. 2023 Jun 28;24(13):10798. doi: 10.3390/ijms241310798 (PMC10341812; doi:10.3390/ijms241310798)
Supplement: Supplementary file 1 [file ijms-24-10798-s001.zip › Supplementary Table S10.xlsx]

## Sheet: STS10 Title
	Supplementary Table S10.- LncRNAs that are upregulated or downregulated in patients with therapy resistance versus partially or complete responders, including information regarding previous references related with EOC.

## Sheet: lncRNA up
Series	Gene_ID	Previous references in EOC	Gene_description	Chromosome_scaffold_name	Gene_start_bp	Gene_end_bp	Strand	Karyotype_band	Gene_name	Gene_GC_content	Gene_type	Gene_Length
GSE51373	ENSG00000180769	[188]	WDFY3 antisense RNA 2 [Source:HGNC Symbol;Acc:HGNC:21603]	chr4	84965534	85011277	1	q21.23	WDFY3-AS2	38.3	lncRNA	9357
GSE30161	ENSG00000224046	-	novel transcript, antisense to DMTF1	chr7	87151422	87152420	-1	q21.12	DMTF1-AS1	47.85	lncRNA	908
GSE63885	ENSG00000237149	[34]	ZNF503 antisense RNA 2 [Source:HGNC Symbol;Acc:HGNC:23525]	chr10	75401519	75408982	1	q22.2	ZNF503-AS2	59.66	lncRNA	3348
GSE30161	ENSG00000237943	[146]	PRKCQ antisense RNA 1 [Source:HGNC Symbol;Acc:HGNC:44689]	chr10	6580419	6616921	1	p15.1	PRKCQ-AS1	40.55	lncRNA	5834
GSE30161	ENSG00000245534	-	RORA antisense RNA 1 [Source:HGNC Symbol;Acc:HGNC:51410]	chr15	60479152	60630637	1	q22.2	RORA-AS1	40.19	lncRNA	2143
GSE63885	ENSG00000245849	[24]	RAD51 antisense RNA 1 [Source:HGNC Symbol;Acc:HGNC:48621]	chr15	40686183	40695107	-1	q15.1	RAD51-AS1	45.04	lncRNA	2820
GSE30161	ENSG00000250365	-	novel transcript, antisense to C14orf126	chr14	31420286	31452883	1	q12	HEATR5A-DT	39.7	lncRNA	3752
GSE63885	ENSG00000251562	[22]	metastasis associated lung adenocarcinoma transcript 1 [Source:HGNC Symbol;Acc:HGNC:29665]	chr11	65497688	65506516	1	q13.1	MALAT1	40.56	lncRNA	8829
GSE30161	ENSG00000255087	-	novel transcript	chr11	127021736	127172363	1	q24.2	ENSG00000255087	41.75	lncRNA	12587

## Sheet: lncRNA down
Series	Gene_ID	Previous references in EOC	Gene_description	Chromosome_scaffold_name	Gene_start_bp	Gene_end_bp	Strand	Karyotype_band	Gene_name	Gene_GC_content	Gene_type	Gene_Length
GSE51373	ENSG00000231607	-	deleted in lymphocytic leukemia 2 [Source:HGNC Symbol;Acc:HGNC:13748]	chr13	49956670	50125720	-1	q14.2	DLEU2	38.87	lncRNA	11574
GSE63885	ENSG00000233101	[279]	HOXB cluster antisense RNA 3 [Source:HGNC Symbol;Acc:HGNC:40283]	chr17	48549630	48606414	1	q21.32	HOXB-AS3	52.62	lncRNA	1913
GSE51373	ENSG00000263753	[12]	long intergenic non-protein coding RNA 667 [Source:HGNC Symbol;Acc:HGNC:27906]	chr18	5237826	5290608	1	p11.31	LINC00667	38.71	lncRNA	10094
GSE51373	ENSG00000225377	[23]	NRSN2 antisense RNA 1 [Source:HGNC Symbol;Acc:HGNC:51222]	chr20	316860	348490	-1	p13	NRSN2-AS1	51.6	lncRNA	6273
GSE63885	ENSG00000212978	-	novel transcript	chr2	61141592	61144969	-1	p15	C2orf74-DT	45.77	lncRNA	3109
GSE30161	ENSG00000291202	-	novel transcript	chr4	119405523	119454655	-1		ENSG00000291202		lncRNA
