# Supplementary material for: Identification of lncRNAs Deregulated in Epithelial Ovarian Cancer Based on a Gene Expression Profiling Meta-Analysis
Source: Int J Mol Sci. 2023 Jun 28;24(13):10798. doi: 10.3390/ijms241310798 (PMC10341812; doi:10.3390/ijms241310798)
Supplement: Supplementary file 1 [file ijms-24-10798-s001.zip › Supplementary Table S11.xlsx]

## Sheet: STS11 Title
	Supplementary Table S11.- List of studies used in the “Subtype” meta analysis with study information, and results from the individual analyses.

## Sheet: STS11 Study information
Series	Country	Year	Platform	Sample source	Clear cell	Endometrioid	Mucinous	Serous	Reference
GSE19539	Australia	2009	Affymetrix Human Gene 1.0 ST Array	Tissue	9	14	7	37	[280]
GSE26193	France	2010	Affymetrix Human Genome U133 Plus 2.0 Array	Tissue	6	8	8	79	[199]
GSE63885	Poland	2014	Affymetrix Human Genome U133 Plus 2.0 Array	Tissue	9	12	0	73	[200]
GSE6008	USA	2006	Affymetrix Human Genome U133A Array	Tissue	8	37	13	41	[135]
GSE121103	USA	2018	Illumina NextSeq 500	Tissue	5	4	5	5	[34]
GSE189553	Japan	2021	Illumina HiSeq 2500	Tissue	11	4	0	8 (HG)	[281]

## Sheet: GSE19539
Parametric p-value	FDR	Clear cell (1)	Endometrioid (2)	Mucinous (3)	Serous (4)	ProbeSet	Pairwise significant	Gene_name	Gene_ID	Gene_description	Chromosome_scaffold_name	Gene_start_bp	Gene_end_bp	Strand	Karyotype_band	Gene_GC_content	Gene_type	Gene_Length
0.0002559	0.00808	305.17	166.3	236.96	147.51	8137271	(2, 1), (4, 1)	AOC1	ENSG00000002726	amine oxidase copper containing 1 [Source:HGNC Symbol;Acc:HGNC:80]	chr7	150824627	150861504	1	q36.1	47.8	protein_coding	3786
0.0048968	0.0544	585.93	507.7	304.3	541.81	7960933	(3, 1), (3, 2), (3, 4)	M6PR	ENSG00000003056	mannose-6-phosphate receptor, cation dependent [Source:HGNC Symbol;Acc:HGNC:6752]	chr12	8940361	8949761	-1	p13.31	42.37	protein_coding	3585
0.0018732	0.0297	71.12	56.85	57.72	43.98	8174654	(4, 1)	KLHL13	ENSG00000003096	kelch like family member 13 [Source:HGNC Symbol;Acc:HGNC:22931]	chrX	117897813	118117340	-1	q24	36.56	protein_coding	6983
1.21e-05	0.000882	55.37	24.8	33.91	18.93	8057599	(2, 1), (4, 1)	TFPI	ENSG00000003436	tissue factor pathway inhibitor [Source:HGNC Symbol;Acc:HGNC:11760]	chr2	187464230	187565760	-1	q32.1	36.6	protein_coding	11714
5.47e-05	0.00265	240.05	180.08	231.14	111.76	8141094	(4, 1), (4, 2), (4, 3)	PDK4	ENSG00000004799	pyruvate dehydrogenase kinase 4 [Source:HGNC Symbol;Acc:HGNC:8812]	chr7	95583499	95596516	-1	q21.3	36.08	protein_coding	4544
0.0019387	0.0302	161.06	98.95	100.61	77.45	8138231	(4, 1)	THSD7A	ENSG00000005108	thrombospondin type 1 domain containing 7A [Source:HGNC Symbol;Acc:HGNC:22207]	chr7	11370365	11832198	-1	p21.3	35.51	protein_coding	10921
0.0088607	0.0766	310.11	210.15	216.99	191.81	8127787	(4, 1)	IBTK	ENSG00000005700	inhibitor of Bruton tyrosine kinase [Source:HGNC Symbol;Acc:HGNC:17853]	chr6	82169986	82247754	-1	q14.1	36.07	protein_coding	8719
0.0073898	0.0685	376.47	193.18	224.19	321.68	8008237	(2, 1), (2, 4)	ITGA3	ENSG00000005884	integrin subunit alpha 3 [Source:HGNC Symbol;Acc:HGNC:6139]	chr17	50055968	50090481	1	q21.33	52.64	protein_coding	9802
0.00665	0.0648	432	391.31	193.53	315.93	8174779	(3, 1), (3, 2)	LAMP2	ENSG00000005893	lysosomal associated membrane protein 2 [Source:HGNC Symbol;Acc:HGNC:6501]	chrX	120426148	120469365	-1	q24	38.61	protein_coding	9404
0.0058184	0.0605	281.59	217.78	265.86	186.31	8171148	(4, 1)	ARSD	ENSG00000006756	arylsulfatase D [Source:HGNC Symbol;Acc:HGNC:717]	chrX	2903972	2929349	-1	p22.33	48.88	protein_coding	7026
0.0016082	0.0272	418.64	183.68	181.99	86.88	8099476	(4, 1)	PROM1	ENSG00000007062	prominin 1 [Source:HGNC Symbol;Acc:HGNC:9454]	chr4	15963076	16084378	-1	p15.32	43.17	protein_coding	7457
0.0027493	0.0378	301.38	203.64	151.68	238.01	8117020	(3, 1), (3, 4)	MYLIP	ENSG00000007944	myosin regulatory light chain interacting protein [Source:HGNC Symbol;Acc:HGNC:21155]	chr6	16129086	16148248	1	p22.3	40.25	protein_coding	3072
0.0002388	0.0077	369.58	248.44	236.85	211.3	8016745	(2, 1), (3, 1), (4, 1)	SPAG9	ENSG00000008294	sperm associated antigen 9 [Source:HGNC Symbol;Acc:HGNC:14524]	chr17	50962174	51120868	-1	q21.33	40	protein_coding	11966
7.56e-05	0.00332	166.56	193.64	267.79	323.32	8026139	(1, 4), (2, 4)	NFIX	ENSG00000008441	nuclear factor I X [Source:HGNC Symbol;Acc:HGNC:7788]	chr19	12995475	13098796	1	p13.13	55.31	protein_coding	6435
0.0004172	0.011	1151.6	1185.26	570.34	1611.91	7953291	(3, 2), (3, 4)	CD9	ENSG00000010278	CD9 molecule [Source:HGNC Symbol;Acc:HGNC:1709]	chr12	6199715	6238271	1	p13.31	51.04	protein_coding	5829
0.0061538	0.062	250.35	260.5	178.09	322.74	7953351	(3, 4)	NCAPD2	ENSG00000010292	non-SMC condensin I complex subunit D2 [Source:HGNC Symbol;Acc:HGNC:24305]	chr12	6493356	6531955	1	p13.31	46.34	protein_coding	6470
0.0015034	0.026	307.38	144.87	217.12	136.43	7954065	(2, 1), (4, 1)	GPRC5A	ENSG00000013588	G protein-coupled receptor class C group 5 member A [Source:HGNC Symbol;Acc:HGNC:9836]	chr12	12891559	12917937	1	p13.1	46.32	protein_coding	7663
0.0011443	0.0221	349.72	205.1	173.49	221.68	8091422	(2, 1), (3, 1), (4, 1)	WWTR1	ENSG00000018408	WW domain containing transcription regulator 1 [Source:HGNC Symbol;Acc:HGNC:24042]	chr3	149517235	149736714	-1	q25.1	41.07	protein_coding	8353
0.0052733	0.0568	40.39	56.78	82.08	60.19	7947590	(1, 3), (1, 4)	SYT13	ENSG00000019505	synaptotagmin 13 [Source:HGNC Symbol;Acc:HGNC:14962]	chr11	45240302	45286341	-1	p11.2	46.29	protein_coding	5445
0.0007457	0.0164	237.53	150.64	117.45	149.24	7974870	(2, 1), (3, 1), (4, 1)	SNAPC1	ENSG00000023608	small nuclear RNA activating complex polypeptide 1 [Source:HGNC Symbol;Acc:HGNC:11134]	chr14	61762420	61796428	1	q23.2	39.55	protein_coding	2593
0.0009138	0.0192	176.83	223.95	152.69	267.86	8066461	(1, 4), (3, 4)	TOMM34	ENSG00000025772	translocase of outer mitochondrial membrane 34 [Source:HGNC Symbol;Acc:HGNC:15746]	chr20	44942130	44960397	-1	q13.12	44.95	protein_coding	1973
0.0061822	0.0622	342.9	251.23	184.99	283.03	7899688	(3, 1), (3, 4)	KPNA6	ENSG00000025800	karyopherin subunit alpha 6 [Source:HGNC Symbol;Acc:HGNC:6399]	chr1	32108056	32176563	1	p35.2	44.21	protein_coding	7457
0.0031913	0.0412	396.3	187.25	184.65	209.76	8130768	(2, 1), (3, 1), (4, 1)	RNASET2	ENSG00000026297	ribonuclease T2 [Source:HGNC Symbol;Acc:HGNC:21686]	chr6	166922113	166957191	-1	q27	48.85	protein_coding	19532
0.0002437	0.00781	113.59	69.26	60.62	71.52	8058670	(2, 1), (3, 1), (4, 1)	IKZF2	ENSG00000030419	IKAROS family zinc finger 2 [Source:HGNC Symbol;Acc:HGNC:13177]	chr2	212999691	213152427	-1	q34	34.84	protein_coding	12243
0.0001305	0.00501	165.72	217.65	193.99	342.72	7975136	(1, 4), (2, 4), (3, 4)	FUT8	ENSG00000033170	fucosyltransferase 8 [Source:HGNC Symbol;Acc:HGNC:4019]	chr14	65410592	65744121	1	q23.3	37.41	protein_coding	6976
0.0012121	0.0229	115.05	162.38	137.77	230.93	7950671	(1, 4)	GAB2	ENSG00000033327	GRB2 associated binding protein 2 [Source:HGNC Symbol;Acc:HGNC:14458]	chr11	78215293	78418348	-1	q14.1	41.71	protein_coding	6775
0.0017204	0.0281	401	284.57	311.54	232.07	8007228	(4, 1)	ATP6V0A1	ENSG00000033627	ATPase H+ transporting V0 subunit a1 [Source:HGNC Symbol;Acc:HGNC:865]	chr17	42458844	42522582	1	q21.2	45.46	protein_coding	10926
0.0024973	0.0358	552.31	321.65	239.31	417.88	8152041	(3, 1), (3, 4)	RNF19A	ENSG00000034677	ring finger protein 19A, RBR E3 ubiquitin protein ligase [Source:HGNC Symbol;Acc:HGNC:13432]	chr8	100257060	100336218	-1	q22.2	38.61	protein_coding	5852
0.0002222	0.00728	1056.05	204.17	135.27	215.1	8106743	(2, 1), (3, 1), (4, 1)	VCAN	ENSG00000038427	versican [Source:HGNC Symbol;Acc:HGNC:2464]	chr5	83471618	83582303	1	q14.2	37.18	protein_coding	14678
0.0021269	0.0322	171.02	118.05	102.19	89.93	8106602	(4, 1)	ZFYVE16	ENSG00000039319	zinc finger FYVE-type containing 16 [Source:HGNC Symbol;Acc:HGNC:20756]	chr5	80408013	80483379	1	q14.1	37.74	protein_coding	15490
0.0001104	0.00435	206.01	87.95	70.67	108.54	8104788	(2, 1), (3, 1), (4, 1)	RAI14	ENSG00000039560	retinoic acid induced 14 [Source:HGNC Symbol;Acc:HGNC:14873]	chr5	34656328	34832612	1	p13.2	42.11	protein_coding	7581
0.0044481	0.0511	189.12	115.93	68.73	110.92	8109830	(3, 1)	SPDL1	ENSG00000040275	spindle apparatus coiled-coil protein 1 [Source:HGNC Symbol;Acc:HGNC:26010]	chr5	169583636	169604778	1	q35.1	37.27	protein_coding	4775
0.0095867	0.0797	382.36	379.82	220.35	362.67	8092321	(3, 1), (3, 2), (3, 4)	DCUN1D1	ENSG00000043093	defective in cullin neddylation 1 domain containing 1 [Source:HGNC Symbol;Acc:HGNC:18184]	chr3	182938074	182985953	-1	q26.33	39.56	protein_coding	8307
0.0092624	0.0779	361.28	216.53	186.76	258.44	8150797	(2, 1), (3, 1)	ATP6V1H	ENSG00000047249	ATPase H+ transporting V1 subunit H [Source:HGNC Symbol;Acc:HGNC:18303]	chr8	53715543	53843558	-1	q11.23	39.2	protein_coding	5104
1.7e-06	0.000227	2135.98	374.35	89.46	1068.11	8091385	(2, 1), (3, 1), (2, 4), (3, 4)	CP	ENSG00000047457	ceruloplasmin [Source:HGNC Symbol;Acc:HGNC:2295]	chr3	149162410	149221829	-1	q25.1	37.36	protein_coding	7072
0.0031155	0.0409	211.35	145.12	103.29	149.19	8152133	(3, 1)	RRM2B	ENSG00000048392	ribonucleotide reductase regulatory TP53 inducible subunit M2B [Source:HGNC Symbol;Acc:HGNC:17296]	chr8	102204502	102238961	-1	q22.3	37.81	protein_coding	5391
3.7e-06	0.0004	54.76	44.83	71.29	30.23	7965322	(4, 1), (4, 2), (4, 3)	KITLG	ENSG00000049130	KIT ligand [Source:HGNC Symbol;Acc:HGNC:6343]	chr12	88492793	88580851	-1	q21.32	36.84	protein_coding	6205
0.0001986	0.00683	38.01	59.45	87.92	49.6	8112342	(1, 2), (1, 3), (4, 3)	ADAMTS6	ENSG00000049192	ADAM metallopeptidase with thrombospondin type 1 motif 6 [Source:HGNC Symbol;Acc:HGNC:222]	chr5	65148738	65481920	-1	q12.3	35.91	protein_coding	8565
0.0059491	0.0611	639.32	606.74	300.46	477.7	7939120	(3, 1), (3, 2)	RCN1	ENSG00000049449	reticulocalbin 1 [Source:HGNC Symbol;Acc:HGNC:9934]	chr11	32091074	32105722	1	p13	46.64	protein_coding	4472
3.7e-06	0.0004	338.66	254	483.42	183.93	7963187	(4, 1), (2, 3), (4, 3)	LIMA1	ENSG00000050405	LIM domain and actin binding 1 [Source:HGNC Symbol;Acc:HGNC:24636]	chr12	50175788	50283546	-1	q13.12	42.32	protein_coding	6317
0.0097128	0.0803	453.71	341.01	212.35	350.75	8115886	(3, 1), (3, 4)	THOC3	ENSG00000051596	THO complex 3 [Source:HGNC Symbol;Acc:HGNC:19072]	chr5	175917873	176034680	-1	q35.2	43.01	protein_coding	3449
0.0003658	0.0101	240.08	250.61	249.45	150.61	7954245	(4, 1), (4, 2), (4, 3)	PLEKHA5	ENSG00000052126	pleckstrin homology domain containing A5 [Source:HGNC Symbol;Acc:HGNC:30036]	chr12	19129733	19376400	1	p12.3	38.1	protein_coding	12577
1.2e-06	0.000169	149.96	107.27	166.16	91.37	8098103	(4, 1), (2, 3), (4, 3)	FNIP2	ENSG00000052795	folliculin interacting protein 2 [Source:HGNC Symbol;Acc:HGNC:29280]	chr4	158769026	158908050	1	q32.1	40.58	protein_coding	10981
0.0003178	0.0091	736.45	363.24	430.58	302.13	7974920	(2, 1), (4, 1)	SYNE2	ENSG00000054654	spectrin repeat containing nuclear envelope protein 2 [Source:HGNC Symbol;Acc:HGNC:17084]	chr14	63761899	64226433	1	q23.2	41.08	protein_coding	32377
0.0089048	0.0767	78.09	78.51	49.84	59.52	8175076	(3, 2)	ZNF280C	ENSG00000056277	zinc finger protein 280C [Source:HGNC Symbol;Acc:HGNC:25955]	chrX	130202707	130268899	-1	q26.1	38.03	protein_coding	4638
0.0001525	0.00552	377.99	490.34	203.46	526.37	8089082	(3, 2), (3, 4)	DCBLD2	ENSG00000057019	discoidin, CUB and LCCL domain containing 2 [Source:HGNC Symbol;Acc:HGNC:24627]	chr3	98795941	98901695	-1	q12.1	38.59	protein_coding	11280
0.0005207	0.0127	192.25	104.14	111.97	100.71	7907702	(2, 1), (3, 1), (4, 1)	SOAT1	ENSG00000057252	sterol O-acyltransferase 1 [Source:HGNC Symbol;Acc:HGNC:11177]	chr1	179293714	179358680	1	q25.2	39.63	protein_coding	7005
0.0040392	0.0482	325.77	220.17	213.66	182.38	8128592	(4, 1)	ATG5	ENSG00000057663	autophagy related 5 [Source:HGNC Symbol;Acc:HGNC:589]	chr6	106045423	106325791	-1	q21	39.61	protein_coding	5655
3.32e-05	0.00187	458.03	423.02	244.67	655.29	7908940	(2, 4), (3, 4)	ATP2B4	ENSG00000058668	ATPase plasma membrane Ca2+ transporting 4 [Source:HGNC Symbol;Acc:HGNC:817]	chr1	203626787	203744081	1	q32.1	46.48	protein_coding	9495
0.0003651	0.0101	183.51	217.92	124.89	233	7916316	(3, 2), (3, 4)	NDC1	ENSG00000058804	NDC1 transmembrane nucleoporin [Source:HGNC Symbol;Acc:HGNC:25525]	chr1	53765478	53838463	-1	p32.3	40.2	protein_coding	4720
0.0014751	0.0257	87.63	69.88	46.61	71.72	7965652	(3, 1), (3, 2), (3, 4)	CDK17	ENSG00000059758	cyclin dependent kinase 17 [Source:HGNC Symbol;Acc:HGNC:8750]	chr12	96278261	96400480	-1	q23.1	37.8	protein_coding	6467
0.0016948	0.0279	610.85	382.27	298.93	450.11	7952953	(2, 1), (3, 1)	WNK1	ENSG00000060237	WNK lysine deficient protein kinase 1 [Source:HGNC Symbol;Acc:HGNC:14540]	chr12	752579	911452	1	p13.33	38.73	protein_coding	17280
0.0001731	0.00618	247.66	188.21	131.87	242.39	7899562	(3, 1), (3, 4)	PTPRU	ENSG00000060656	protein tyrosine phosphatase receptor type U [Source:HGNC Symbol;Acc:HGNC:9683]	chr1	29236516	29326813	1	p35.3	51.58	protein_coding	6682
0.0067307	0.0652	257.12	271.16	153.89	268.03	7939158	(3, 2), (3, 4)	QSER1	ENSG00000060749	glutamine and serine rich 1 [Source:HGNC Symbol;Acc:HGNC:26154]	chr11	32892811	32993316	1	p13	38.69	protein_coding	10908
0.0038502	0.0468	307.9	204.63	151.91	196.09	8017235	(3, 1), (4, 1)	APPBP2	ENSG00000062725	amyloid beta precursor protein binding protein 2 [Source:HGNC Symbol;Acc:HGNC:622]	chr17	60443158	60526242	-1	q23.2	39.71	protein_coding	9890
1.17e-05	0.000873	102.1	113.56	216.52	92.05	7997593	(1, 3), (2, 3), (4, 3)	ATP2C2	ENSG00000064270	ATPase secretory pathway Ca2+ transporting 2 [Source:HGNC Symbol;Acc:HGNC:29103]	chr16	84368527	84464187	1	q24.1	48.83	protein_coding	7352
1.18e-05	0.000873	254.67	280.56	790.8	251.53	8107769	(1, 3), (2, 3), (4, 3)	SLC12A2	ENSG00000064651	solute carrier family 12 member 2 [Source:HGNC Symbol;Acc:HGNC:10911]	chr5	128083766	128189677	1	q23.3	35.24	protein_coding	10653
0.0074862	0.069	105.71	66.4	62.66	70.88	8107632	(2, 1), (3, 1), (4, 1)	SNX24	ENSG00000064652	sorting nexin 24 [Source:HGNC Symbol;Acc:HGNC:21533]	chr5	122843439	123029354	1	q23.2	40.32	protein_coding	3474
0.0013832	0.0246	99.18	198.04	127.79	234.7	8063187	(1, 4)	EYA2	ENSG00000064655	EYA transcriptional coactivator and phosphatase 2 [Source:HGNC Symbol;Acc:HGNC:3520]	chr20	46894624	47188844	1	q13.12	45.44	protein_coding	3618
0.0041088	0.0487	503.6	263.45	343.43	272.46	8024111	(2, 1), (4, 1)	CNN2	ENSG00000064666	calponin 2 [Source:HGNC Symbol;Acc:HGNC:2156]	chr19	1026586	1039068	1	p13.3	59.72	protein_coding	3640
0.006118	0.0619	97.83	104.94	68	114.88	7904364	(3, 4)	WDR3	ENSG00000065183	WD repeat domain 3 [Source:HGNC Symbol;Acc:HGNC:12755]	chr1	117929720	117966543	1	p12	36.95	protein_coding	10276
0.0009169	0.0192	94.12	170.96	92.29	137.78	7931930	(1, 2), (3, 2)	PRKCQ	ENSG00000065675	protein kinase C theta [Source:HGNC Symbol;Acc:HGNC:9410]	chr10	6427143	6580301	-1	p15.1	43.1	protein_coding	3295
2.69e-05	0.00154	89.52	59.52	72.87	39.34	8127854	(4, 1), (4, 2), (4, 3)	ME1	ENSG00000065833	malic enzyme 1 [Source:HGNC Symbol;Acc:HGNC:6983]	chr6	83210402	83431051	-1	q14.2	36.91	protein_coding	3338
0.0019321	0.0302	170.14	208.46	120.29	260.27	8084064	(3, 4)	MTHFD2	ENSG00000065911	methylenetetrahydrofolate dehydrogenase (NADP+ dependent) 2, methenyltetrahydrofolate cyclohydrolase [Source:HGNC Symbol;Acc:HGNC:7434]	chr2	74186172	74217565	1	p13.1	43.85	protein_coding	11443
0.0020744	0.0316	204.73	261.52	128.58	336.77	8042830	(3, 4)	MTHFD2	ENSG00000065911	methylenetetrahydrofolate dehydrogenase (NADP+ dependent) 2, methenyltetrahydrofolate cyclohydrolase [Source:HGNC Symbol;Acc:HGNC:7434]	chr2	74186172	74217565	1	p13.1	43.85	protein_coding	11443
1.08e-05	0.000841	49.94	178.32	86.51	163.3	7947274	(1, 2), (1, 4)	MPPED2	ENSG00000066382	metallophosphoesterase domain containing 2 [Source:HGNC Symbol;Acc:HGNC:1180]	chr11	30384493	30586872	-1	p14.1	40.01	protein_coding	8114
0.0002318	0.00754	164.28	290.12	149.65	315.3	7936734	(1, 4), (3, 2), (3, 4)	FGFR2	ENSG00000066468	fibroblast growth factor receptor 2 [Source:HGNC Symbol;Acc:HGNC:3689]	chr10	121478332	121598458	-1	q26.13	45.41	protein_coding	18813
0.0057316	0.0598	307.95	146.27	201.43	225.89	7925876	(2, 1), (2, 4)	PFKP	ENSG00000067057	phosphofructokinase, platelet [Source:HGNC Symbol;Acc:HGNC:8878]	chr10	3066333	3137718	1	p15.2	51.45	protein_coding	7728
0.0003514	0.00987	68.99	52.21	42.61	37.77	8112107	(4, 1)	PLPP1	ENSG00000067113	phospholipid phosphatase 1 [Source:HGNC Symbol;Acc:HGNC:9228]	chr5	55424854	55534969	-1	q11.2	39.6	protein_coding	1935
0.0074018	0.0685	190.33	276.15	184.85	319.83	7984704	(1, 4)	NEO1	ENSG00000067141	neogenin 1 [Source:HGNC Symbol;Acc:HGNC:7754]	chr15	73051710	73305205	1	q24.1	38.73	protein_coding	8137
0.0011071	0.0218	1073.79	946.02	525.8	961.96	8151281	(3, 1), (3, 2), (3, 4)	TRAM1	ENSG00000067167	translocation associated membrane protein 1 [Source:HGNC Symbol;Acc:HGNC:20568]	chr8	70573218	70608416	-1	q13.3	38.27	protein_coding	4131
0.0073822	0.0685	71.18	65.02	67.37	50.01	8166511	(4, 1)	PDK3	ENSG00000067992	pyruvate dehydrogenase kinase 3 [Source:HGNC Symbol;Acc:HGNC:8811]	chrX	24465270	24550466	1	p22.11	40.79	protein_coding	13506
4.92e-05	0.00246	443.24	174.25	208.7	168.36	7970162	(2, 1), (3, 1), (4, 1)	ATP11A	ENSG00000068650	ATPase phospholipid transporting 11A [Source:HGNC Symbol;Acc:HGNC:13552]	chr13	112690038	112887168	1	q34	50.37	protein_coding	14024
0.002347	0.0345	312.34	401.9	195.09	301.65	8105523	(3, 2)	KIF2A	ENSG00000068796	kinesin family member 2A [Source:HGNC Symbol;Acc:HGNC:6318]	chr5	62306162	62391025	1	q12.1	38.5	protein_coding	13050
0.0070546	0.067	893.95	917.81	608.26	1038.39	7923798	(3, 4)	NUCKS1	ENSG00000069275	nuclear casein kinase and cyclin dependent kinase substrate 1 [Source:HGNC Symbol;Acc:HGNC:29923]	chr1	205712822	205750182	-1	q32.1	39.53	protein_coding	6449
0.000279	0.00849	73.76	84.88	203.62	69.92	8172204	(1, 3), (2, 3), (4, 3)	MAOB	ENSG00000069535	monoamine oxidase B [Source:HGNC Symbol;Acc:HGNC:6834]	chrX	43766610	43882450	-1	p11.3	39.31	protein_coding	2895
1e-07	2.57e-05	30.17	46.3	101.72	38.05	7999588	(1, 3), (2, 3), (4, 3)	PLA2G10	ENSG00000069764	phospholipase A2 group X [Source:HGNC Symbol;Acc:HGNC:9029]	chr16	14672548	14694308	-1	p13.12	47.68	protein_coding	752
0.0020583	0.0315	249.52	215.09	215.1	165.75	8017850	(4, 1)	WIPI1	ENSG00000070540	WD repeat domain, phosphoinositide interacting 1 [Source:HGNC Symbol;Acc:HGNC:25471]	chr17	68420948	68457513	-1	q24.2	46.58	protein_coding	3403
0.0045002	0.0514	192.45	188.56	108.82	310.96	8180372	(3, 4)	ST6GALNAC2	ENSG00000070731	ST6 N-acetylgalactosaminide alpha-2,6-sialyltransferase 2 [Source:HGNC Symbol;Acc:HGNC:10867]	chr17	76565377	76586956	-1	q25.1	54.09	protein_coding	3002
0.0047732	0.0536	154.48	195.69	165.01	220.44	8085145	(1, 4)	RAD18	ENSG00000070950	RAD18 E3 ubiquitin protein ligase [Source:HGNC Symbol;Acc:HGNC:18278]	chr3	8775402	8963773	-1	p25.3	40.44	protein_coding	6984
0.0091058	0.0772	267.35	320.41	234.76	387.3	7965359	(3, 4)	ATP2B1	ENSG00000070961	ATPase plasma membrane Ca2+ transporting 1 [Source:HGNC Symbol;Acc:HGNC:814]	chr12	89588049	89709300	-1	q21.33	36.37	protein_coding	9500
0.0037	0.0456	189.51	106.77	98.11	104.89	8054135	(2, 1), (3, 1), (4, 1)	MGAT4A	ENSG00000071073	alpha-1,3-mannosyl-glycoprotein 4-beta-N-acetylglucosaminyltransferase A [Source:HGNC Symbol;Acc:HGNC:7047]	chr2	98619106	98731132	-1	q11.2	40.02	protein_coding	9636
0.0070158	0.0668	120.49	141.06	106.21	164.91	8104234	(3, 4)	TRIP13	ENSG00000071539	thyroid hormone receptor interactor 13 [Source:HGNC Symbol;Acc:HGNC:12307]	chr5	892884	919357	1	p15.33	50.22	protein_coding	3319
0.0042215	0.0494	597.29	383	294.26	418.73	8170882	(2, 1), (3, 1)	ATP6AP1	ENSG00000071553	ATPase H+ transporting accessory protein 1 [Source:HGNC Symbol;Acc:HGNC:868]	chrX	154428633	154436516	1	q28	56.77	protein_coding	5683
0.002371	0.0347	200.4	205.69	112.7	246.88	8091354	(3, 4)	HLTF	ENSG00000071794	helicase like transcription factor [Source:HGNC Symbol;Acc:HGNC:11099]	chr3	149030127	149086554	-1	q24	35.95	protein_coding	6024
0.0058282	0.0605	192.65	180.8	151.5	235.93	8034783	(3, 4)	ADGRL1	ENSG00000072071	adhesion G protein-coupled receptor L1 [Source:HGNC Symbol;Acc:HGNC:20973]	chr19	14147743	14206187	-1	p13.12	56.42	protein_coding	8487
0.0076926	0.0701	157.41	290.7	228.94	219.82	8005638	(1, 2)	ALDH3A2	ENSG00000072210	aldehyde dehydrogenase 3 family member A2 [Source:HGNC Symbol;Acc:HGNC:403]	chr17	19648136	19685760	1	p11.2	45.09	protein_coding	15331
0.0058687	0.0607	154.32	130.56	78.7	106.14	7927658	(3, 1)	UBE2D1	ENSG00000072401	ubiquitin conjugating enzyme E2 D1 [Source:HGNC Symbol;Acc:HGNC:12474]	chr10	58334979	58370751	1	q21.1	36.06	protein_coding	3480
0.0020299	0.0311	181.01	115.08	156.06	116.33	7985662	(2, 1), (4, 1)	PDE8A	ENSG00000073417	phosphodiesterase 8A [Source:HGNC Symbol;Acc:HGNC:8793]	chr15	84980440	85139145	1	q25.3	41.8	protein_coding	8004
2.58e-05	0.00152	88.51	85.85	278.59	81.15	8014903	(1, 3), (2, 3), (4, 3)	GSDMB	ENSG00000073605	gasdermin B [Source:HGNC Symbol;Acc:HGNC:23690]	chr17	39904595	39919854	-1	q21.1	48.85	protein_coding	5905
0.0008896	0.0188	132.01	88.47	63.43	103.93	8082869	(3, 1), (3, 4)	PPP2R3A	ENSG00000073711	protein phosphatase 2 regulatory subunit B''alpha [Source:HGNC Symbol;Acc:HGNC:9307]	chr3	135965728	136147894	1	q22.2	39.06	protein_coding	7785
0.0016669	0.0277	195.77	323.63	151.36	378.13	8084717	(1, 4), (3, 4)	ST6GAL1	ENSG00000073849	ST6 beta-galactoside alpha-2,6-sialyltransferase 1 [Source:HGNC Symbol;Acc:HGNC:10860]	chr3	186930325	187078553	1	q27.3	44.4	protein_coding	11142
0.0013013	0.0236	72.98	73.36	113.14	68.67	7968417	(1, 3), (2, 3), (4, 3)	FRY	ENSG00000073910	FRY microtubule binding protein [Source:HGNC Symbol;Acc:HGNC:20367]	chr13	31846713	32299125	1	q13.1	39.24	protein_coding	18852
0.0016285	0.0274	179.97	239.85	123.24	234.12	7950597	(3, 2), (3, 4)	CLNS1A	ENSG00000074201	chloride nucleotide-sensitive channel 1A [Source:HGNC Symbol;Acc:HGNC:2080]	chr11	77514936	77637794	-1	q14.1	41.76	protein_coding	4581
0.0001339	0.00506	211.09	117.37	200.56	136.56	8090433	(2, 1), (4, 1), (2, 3), (4, 3)	MGLL	ENSG00000074416	monoglyceride lipase [Source:HGNC Symbol;Acc:HGNC:17038]	chr3	127689062	128052190	-1	q21.3	44.86	protein_coding	11849
0.0055099	0.0588	764.47	640.29	332.73	532.42	8023561	(3, 1), (3, 2)	LMAN1	ENSG00000074695	lectin, mannose binding 1 [Source:HGNC Symbol;Acc:HGNC:6631]	chr18	59327823	59359265	-1	q21.32	36.9	protein_coding	6070
0.0051942	0.0564	3690.23	2213.49	1493.11	2643.58	7912198	(3, 1), (3, 4)	ENO1	ENSG00000074800	enolase 1 [Source:HGNC Symbol;Acc:HGNC:3350]	chr1	8861000	8879190	-1	p36.23	50.15	protein_coding	5216
0.0001298	0.00501	50.21	150.08	50.14	103.04	8140668	(1, 2), (1, 4), (3, 2), (3, 4)	SEMA3A	ENSG00000075213	semaphorin 3A [Source:HGNC Symbol;Acc:HGNC:10723]	chr7	83955777	84492724	-1	q21.11	34.35	protein_coding	9259
0.0006225	0.0144	235.13	155.14	209.23	158.41	8073890	(2, 1), (4, 1)	GRAMD4	ENSG00000075240	GRAM domain containing 4 [Source:HGNC Symbol;Acc:HGNC:29113]	chr22	46576012	46679790	1	q13.31	57.68	protein_coding	4901
0.0003888	0.0106	751.03	468.92	320.3	383.24	8083901	(3, 1), (4, 1)	FNDC3B	ENSG00000075420	fibronectin type III domain containing 3B [Source:HGNC Symbol;Acc:HGNC:24670]	chr3	172039578	172401669	1	q26.31	39.76	protein_coding	13324
0.0042403	0.0494	271.25	217.67	206.46	157.69	8100292	(4, 1)	FRYL	ENSG00000075539	FRY like transcription coactivator [Source:HGNC Symbol;Acc:HGNC:29127]	chr4	48497357	48780322	-1	p11	36.94	protein_coding	18165
2e-06	0.000251	132.3	90.06	218.73	79.58	8092134	(4, 1), (2, 3), (4, 3)	PLD1	ENSG00000075651	phospholipase D1 [Source:HGNC Symbol;Acc:HGNC:9067]	chr3	171600404	171810950	-1	q26.31	38.86	protein_coding	12860
0.0005416	0.013	946.59	687.39	404.75	728.6	8082431	(3, 1), (3, 2), (3, 4)	RAB7A	ENSG00000075785	RAB7A, member RAS oncogene family [Source:HGNC Symbol;Acc:HGNC:9788]	chr3	128693669	128825942	1	q21.3	45.18	protein_coding	7194
0.0008754	0.0186	88.69	104.49	147.41	122.01	7923991	(1, 3), (1, 4), (2, 3)	PLXNA2	ENSG00000076356	plexin A2 [Source:HGNC Symbol;Acc:HGNC:9100]	chr1	208022242	208244384	-1	q32.2	47.99	protein_coding	13845
0.00189	0.0299	259.03	158.2	174.5	156.3	7994280	(2, 1), (4, 1)	IL4R	ENSG00000077238	interleukin 4 receptor [Source:HGNC Symbol;Acc:HGNC:6015]	chr16	27313668	27364778	1	p12.1	49.92	protein_coding	5884
8e-05	0.00346	427.05	242.12	111.04	175.86	8073775	(3, 1), (4, 1), (3, 2)	FBLN1	ENSG00000077942	fibulin 1 [Source:HGNC Symbol;Acc:HGNC:3600]	chr22	45502238	45601135	1	q13.31	53.13	protein_coding	7285
0.0052684	0.0568	90.91	103.77	72.94	135.4	8092348	(3, 4)	LAMP3	ENSG00000078081	lysosomal associated membrane protein 3 [Source:HGNC Symbol;Acc:HGNC:14582]	chr3	183122215	183163839	-1	q27.1	44.17	protein_coding	3785
0.0037661	0.046	97.52	84.98	49.06	61.51	8094719	(3, 1), (4, 1)	N4BP2	ENSG00000078177	NEDD4 binding protein 2 [Source:HGNC Symbol;Acc:HGNC:29851]	chr4	40056850	40158252	1	p14	40.51	protein_coding	9811
0.0046114	0.0521	607.05	401.46	365.26	451.15	8061986	(2, 1), (3, 1)	ITCH	ENSG00000078747	itchy E3 ubiquitin protein ligase [Source:HGNC Symbol;Acc:HGNC:13890]	chr20	34363241	34540748	1	q11.22	41.77	protein_coding	10639
3.6e-06	0.0004	37.35	43.75	133.97	39.74	8151795	(1, 3), (2, 3), (4, 3)	CDH17	ENSG00000079112	cadherin 17 [Source:HGNC Symbol;Acc:HGNC:1756]	chr8	94127162	94217303	-1	q22.1	40.61	protein_coding	3878
0.0009523	0.0197	134.35	133.94	80.73	179.49	8104930	(3, 4)	SLC1A3	ENSG00000079215	solute carrier family 1 member 3 [Source:HGNC Symbol;Acc:HGNC:10941]	chr5	36596588	36688334	1	p13.2	40.39	protein_coding	21227
0.0014385	0.0252	72.53	100.53	91.5	62.61	8037205	(4, 2)	CEACAM1	ENSG00000079385	CEA cell adhesion molecule 1 [Source:HGNC Symbol;Acc:HGNC:1814]	chr19	42507304	42561234	-1	q13.2	47.52	protein_coding	5527
0.0002661	0.00827	404.62	219.26	271.72	241.58	7901951	(2, 1), (4, 1)	PGM1	ENSG00000079739	phosphoglucomutase 1 [Source:HGNC Symbol;Acc:HGNC:8905]	chr1	63593411	63660245	1	p31.3	42.35	protein_coding	4077
0.0033843	0.0428	394.47	253.84	413.01	332.88	8025741	(2, 1), (2, 3)	DNM2	ENSG00000079805	dynamin 2 [Source:HGNC Symbol;Acc:HGNC:2974]	chr19	10718055	10833488	1	p13.2	53.08	protein_coding	17565
0.0002845	0.00863	100.97	112.19	58.49	50.69	8129573	(4, 1), (4, 2)	MOXD1	ENSG00000079931	monooxygenase DBH like 1 [Source:HGNC Symbol;Acc:HGNC:21063]	chr6	132296055	132401475	-1	q23.2	37.05	protein_coding	5223
1.2e-06	0.000169	82.64	58.04	154.41	54.84	8095585	(1, 3), (2, 3), (4, 3)	SLC4A4	ENSG00000080493	solute carrier family 4 member 4 [Source:HGNC Symbol;Acc:HGNC:11030]	chr4	71062667	71572087	1	q13.3	37.95	protein_coding	9153
7.54e-05	0.00332	108.95	104.13	122.31	76.54	8128698	(4, 1), (4, 2), (4, 3)	SESN1	ENSG00000080546	sestrin 1 [Source:HGNC Symbol;Acc:HGNC:21595]	chr6	108986437	109094819	-1	q21	37.66	protein_coding	5121
0.0048467	0.054	118.27	83.04	68.66	77.69	8169249	(3, 1), (4, 1)	MID2	ENSG00000080561	midline 2 [Source:HGNC Symbol;Acc:HGNC:7096]	chrX	107825755	107931637	1	q22.3	39.96	protein_coding	7554
0.0002531	0.00806	141.89	114.72	181.66	88.68	8120552	(4, 1), (4, 3)	FAM135A	ENSG00000082269	family with sequence similarity 135 member A [Source:HGNC Symbol;Acc:HGNC:21084]	chr6	70412941	70561174	1	q13	36.09	protein_coding	10476
< 1e-07	< 1e-07	196.16	76.44	110.06	68.68	8056343	(2, 1), (3, 1), (4, 1), (4, 3)	COBLL1	ENSG00000082438	cordon-bleu WH2 repeat protein like 1 [Source:HGNC Symbol;Acc:HGNC:23571]	chr2	164653624	164843679	-1	q24.3	36.27	protein_coding	17176
0.0006028	0.0141	538.6	566.63	297.62	638.71	8052526	(3, 1), (3, 2), (3, 4)	XPO1	ENSG00000082898	exportin 1 [Source:HGNC Symbol;Acc:HGNC:12825]	chr2	61476032	61538741	-1	p15	41.09	protein_coding	23843
0.0003098	0.00902	394.93	201.95	188.57	185.35	8162147	(2, 1), (3, 1), (4, 1)	TUT7	ENSG00000083223	terminal uridylyl transferase 7 [Source:HGNC Symbol;Acc:HGNC:25817]	chr9	86287733	86354454	-1	q21.33	37.99	protein_coding	6707
7e-07	0.000106	523.11	242.83	206.31	196.34	7897803	(2, 1), (3, 1), (4, 1)	PLOD1	ENSG00000083444	procollagen-lysine,2-oxoglutarate 5-dioxygenase 1 [Source:HGNC Symbol;Acc:HGNC:9081]	chr1	11934205	11975538	1	p36.22	53.54	protein_coding	5320
0.0011507	0.0221	484.95	523.79	399.89	655.37	8053890	(3, 4)	STARD7	ENSG00000084090	StAR related lipid transfer domain containing 7 [Source:HGNC Symbol;Acc:HGNC:18063]	chr2	96184859	96208827	-1	q11.2	42.97	protein_coding	4416
0.0063	0.0628	316.65	315.4	211.87	332.89	8095262	(3, 2), (3, 4)	REST	ENSG00000084093	RE1 silencing transcription factor [Source:HGNC Symbol;Acc:HGNC:9966]	chr4	56907876	56966808	1	q12	43.58	protein_coding	9408
0.0003136	0.00906	218.05	226.22	124.85	228.76	7961489	(3, 1), (3, 2), (3, 4)	WBP11	ENSG00000084463	WW domain binding protein 11 [Source:HGNC Symbol;Acc:HGNC:16461]	chr12	14784582	14803486	-1	p12.3	37.11	protein_coding	5258
0.0089717	0.0768	126.4	153.1	169.13	110.1	8128572	(4, 2), (4, 3)	PREP	ENSG00000085377	prolyl endopeptidase [Source:HGNC Symbol;Acc:HGNC:9358]	chr6	105273218	105454062	-1	q21	40.86	protein_coding	8917
0.0041867	0.0491	161.98	111.76	160.37	121.16	7916024	(2, 1), (4, 1), (2, 3)	TTC39A	ENSG00000085831	tetratricopeptide repeat domain 39A [Source:HGNC Symbol;Acc:HGNC:18657]	chr1	51287258	51345116	-1	p32.3	51.4	protein_coding	9491
0.0001388	0.00515	607.64	354	178.79	318.67	8160637	(3, 1), (4, 1), (3, 2), (3, 4)	B4GALT1	ENSG00000086062	beta-1,4-galactosyltransferase 1 [Source:HGNC Symbol;Acc:HGNC:924]	chr9	33104082	33167356	-1	p21.1	47.1	protein_coding	4896
0.0039978	0.0477	168.25	113.66	76.02	102.78	8131957	(3, 1), (4, 1)	SNX10	ENSG00000086300	sorting nexin 10 [Source:HGNC Symbol;Acc:HGNC:14974]	chr7	26291862	26374383	1	p15.2	42.67	protein_coding	3605
< 1e-07	< 1e-07	68.79	81.5	579.5	61.56	8029098	(1, 3), (2, 3), (4, 3)	CEACAM6	ENSG00000086548	CEA cell adhesion molecule 6 [Source:HGNC Symbol;Acc:HGNC:1818]	chr19	41750977	41772211	1	q13.2	45.91	protein_coding	2956
2.9e-05	0.00165	64.21	65.28	58.82	109.12	8115302	(1, 4), (2, 4), (3, 4)	FAT2	ENSG00000086570	FAT atypical cadherin 2 [Source:HGNC Symbol;Acc:HGNC:3596]	chr5	151504092	151591331	-1	q33.1	46.28	protein_coding	14712
0.0089274	0.0768	1169.56	1025.55	619.41	912.9	7959597	(3, 1), (3, 2)	TMED2	ENSG00000086598	transmembrane p24 trafficking protein 2 [Source:HGNC Symbol;Acc:HGNC:16996]	chr12	123584533	123598582	1	q24.31	42.26	protein_coding	3833
0.0061802	0.0622	236.44	172.42	142.08	150.38	8166230	(3, 1), (4, 1)	TXLNG	ENSG00000086712	taxilin gamma [Source:HGNC Symbol;Acc:HGNC:18578]	chrX	16786432	16844519	1	p22.2	42.93	protein_coding	4455
4.72e-05	0.00239	324.75	98.91	170.65	103.65	7979133	(2, 1), (4, 1)	NID2	ENSG00000087303	nidogen 2 [Source:HGNC Symbol;Acc:HGNC:13389]	chr14	52004803	52069228	-1	q22.1	43.25	protein_coding	6392
0.0004407	0.0115	138.01	133.29	75.6	192.43	8063536	(3, 4)	TFAP2C	ENSG00000087510	transcription factor AP-2 gamma [Source:HGNC Symbol;Acc:HGNC:11744]	chr20	56629306	56639283	1	q13.31	48.95	protein_coding	3001
0.0030784	0.0405	144.19	135.02	114.59	98.25	8171435	(4, 1), (4, 2)	PIR	ENSG00000087842	pirin [Source:HGNC Symbol;Acc:HGNC:30048]	chrX	15384799	15493564	-1	p22.2	38.99	protein_coding	2512
0.0032961	0.0421	212.09	146.67	235.25	168.43	8065948	(2, 1), (2, 3)	FER1L4	ENSG00000088340	fer-1 like family member 4 (pseudogene) [Source:HGNC Symbol;Acc:HGNC:15801]	chr20	35558737	35607562	-1	q11.22	49.6	transcribed_unitary_pseudogene	10228
0.0067857	0.0656	87.8	58.2	70.83	52.84	7972461	(4, 1)	SLC15A1	ENSG00000088386	solute carrier family 15 member 1 [Source:HGNC Symbol;Acc:HGNC:10920]	chr13	98683801	98752672	-1	q32.3	44.52	protein_coding	4210
0.0002122	0.00706	118.3	213.05	102.59	98.65	8061305	(3, 2), (4, 2)	KIZ	ENSG00000088970	kizuna centrosomal protein [Source:HGNC Symbol;Acc:HGNC:15865]	chr20	21125983	21246622	1	p11.23	41.17	protein_coding	5207
4.3e-06	0.000447	109.26	113.85	221.97	93.47	7966749	(1, 3), (2, 3), (4, 3)	TESC	ENSG00000088992	tescalcin [Source:HGNC Symbol;Acc:HGNC:26065]	chr12	117038923	117099479	-1	q24.22	51.4	protein_coding	1926
0.0050517	0.0555	114.82	103.21	127.27	86.19	8065089	(4, 3)	KIF16B	ENSG00000089177	kinesin family member 16B [Source:HGNC Symbol;Acc:HGNC:15869]	chr20	16272104	16573448	-1	p12.1	40.7	protein_coding	7735
2.6e-06	0.000318	55.52	45.39	115.14	43.63	8167973	(1, 3), (2, 3), (4, 3)	HEPH	ENSG00000089472	hephaestin [Source:HGNC Symbol;Acc:HGNC:4866]	chrX	66162671	66268867	1	q12	38.49	protein_coding	9888
0.0061366	0.0619	696.99	463.12	343.93	437.63	7976598	(3, 1), (4, 1)	PAPOLA	ENSG00000090060	poly(A) polymerase alpha [Source:HGNC Symbol;Acc:HGNC:14981]	chr14	96501433	96567116	1	q32.2	36.57	protein_coding	13609
0.0065507	0.0643	205.22	146.91	133.89	231.64	8025601	(2, 4)	ICAM1	ENSG00000090339	intercellular adhesion molecule 1 [Source:HGNC Symbol;Acc:HGNC:5344]	chr19	10271093	10286615	1	p13.2	51.86	protein_coding	3448
0.0028142	0.0382	121.6	152.85	795.54	109.78	7957023	(1, 3), (2, 3), (4, 3)	LYZ	ENSG00000090382	lysozyme [Source:HGNC Symbol;Acc:HGNC:6740]	chr12	69348381	69354234	1	q15	36.54	protein_coding	1724
7.2e-06	0.000627	175.45	93.18	107.45	82.3	8092707	(2, 1), (4, 1)	P3H2	ENSG00000090530	prolyl 3-hydroxylase 2 [Source:HGNC Symbol;Acc:HGNC:19317]	chr3	189956728	190122437	-1	q28	38.18	protein_coding	5573
0.006715	0.0651	375.83	328.48	249.51	414.65	7915207	(3, 4)	PABPC4	ENSG00000090621	poly(A) binding protein cytoplasmic 4 [Source:HGNC Symbol;Acc:HGNC:8557]	chr1	39560709	39576790	-1	p34.3	47.21	protein_coding	10274
0.002974	0.0398	64.68	96.95	41.53	98.77	8142270	(3, 2), (3, 4)	NRCAM	ENSG00000091129	neuronal cell adhesion molecule [Source:HGNC Symbol;Acc:HGNC:7994]	chr7	108147623	108456717	-1	q31.1	39	protein_coding	8232
5.4e-06	0.000529	986	449.45	549.37	282.41	8142194	(2, 1), (4, 1)	LAMB1	ENSG00000091136	laminin subunit beta 1 [Source:HGNC Symbol;Acc:HGNC:6486]	chr7	107923799	108003213	-1	q31.1	42.41	protein_coding	18592
0.0035612	0.0444	336.29	280.84	170.45	399.13	8085999	(3, 4)	CMTM6	ENSG00000091317	CKLF like MARVEL transmembrane domain containing 6 [Source:HGNC Symbol;Acc:HGNC:19177]	chr3	32481312	32502852	-1	p22.3	38.52	protein_coding	3857
0.0089611	0.0768	482.1	347.56	574.65	288.63	8046380	(4, 3)	ITGA6	ENSG00000091409	integrin subunit alpha 6 [Source:HGNC Symbol;Acc:HGNC:6142]	chr2	172427354	172506459	1	q31.1	41.78	protein_coding	6679
1.9e-06	0.000244	66.55	266.44	121.78	283.28	8122843	(1, 2), (1, 4), (3, 4)	ESR1	ENSG00000091831	estrogen receptor 1 [Source:HGNC Symbol;Acc:HGNC:3467]	chr6	151656691	152129619	1	q25.1	39.66	protein_coding	13726
0.0071188	0.0673	102.85	117.27	88.81	178.9	8081657	(3, 4)	CD200	ENSG00000091972	CD200 molecule [Source:HGNC Symbol;Acc:HGNC:7203]	chr3	112332347	112362812	1	q13.2	38.61	protein_coding	2991
5.02e-05	0.00248	289.1	118.36	88.94	76.08	8113666	(2, 1), (3, 1), (4, 1)	SEMA6A	ENSG00000092421	semaphorin 6A [Source:HGNC Symbol;Acc:HGNC:10738]	chr5	116443555	116574823	-1	q23.1	40.55	protein_coding	10906
0.0031959	0.0412	164.63	196.91	106.26	213.09	8041867	(3, 2), (3, 4)	MSH2	ENSG00000095002	mutS homolog 2 [Source:HGNC Symbol;Acc:HGNC:7325]	chr2	47403067	47663146	1	p21	45.38	protein_coding	13674
< 1e-07	< 1e-07	181.76	155.83	98.23	432.68	8157650	(1, 4), (2, 4), (3, 4)	PTGS1	ENSG00000095303	prostaglandin-endoperoxide synthase 1 [Source:HGNC Symbol;Acc:HGNC:9604]	chr9	122370530	122395703	1	q33.2	50.08	protein_coding	5784
5.7e-05	0.00271	116.02	82.82	107.18	62.58	7935270	(4, 1), (4, 3)	BLNK	ENSG00000095585	B cell linker [Source:HGNC Symbol;Acc:HGNC:14211]	chr10	96189171	96271587	-1	q24.1	42.63	protein_coding	6186
0.0002725	0.00836	148.75	190.13	100.38	80.03	7926875	(4, 2)	BAMBI	ENSG00000095739	BMP and activin membrane bound inhibitor [Source:HGNC Symbol;Acc:HGNC:30251]	chr10	28677510	28682932	1	p12.1	46.04	protein_coding	2139
0.00572	0.0598	345.58	190.79	298.75	265.45	8118734	(2, 1)	ITPR3	ENSG00000096433	inositol 1,4,5-trisphosphate receptor type 3 [Source:HGNC Symbol;Acc:HGNC:6182]	chr6	33620365	33696574	1	p21.31	55.13	protein_coding	9870
0.0018042	0.0291	130.04	128.04	180.21	97.32	8155898	(4, 3)	PCSK5	ENSG00000099139	proprotein convertase subtilisin/kexin type 5 [Source:HGNC Symbol;Acc:HGNC:8747]	chr9	75890644	76362975	1	q21.13	40.15	protein_coding	13341
0.0064687	0.0638	275.87	159.68	204.85	157.45	7932985	(2, 1), (4, 1)	NRP1	ENSG00000099250	neuropilin 1 [Source:HGNC Symbol;Acc:HGNC:8004]	chr10	33177492	33336262	-1	p11.22	41.34	protein_coding	11522
0.0036202	0.045	376.93	244.51	271.02	245.34	8032392	(2, 1), (4, 1)	MKNK2	ENSG00000099875	MAPK interacting serine/threonine kinase 2 [Source:HGNC Symbol;Acc:HGNC:7111]	chr19	2037465	2051244	-1	p13.3	64.23	protein_coding	5221
0.0044506	0.0511	392.27	297.71	271.98	256.77	8076465	(4, 1)	POLDIP3	ENSG00000100227	DNA polymerase delta interacting protein 3 [Source:HGNC Symbol;Acc:HGNC:23782]	chr22	42583721	42614962	-1	q13.2	49.1	protein_coding	3650
0.0002651	0.00826	411.28	237.53	282.65	232.25	8076481	(2, 1), (4, 1)	CYB5R3	ENSG00000100243	cytochrome b5 reductase 3 [Source:HGNC Symbol;Acc:HGNC:2873]	chr22	42617840	42649392	-1	q13.2	55.85	protein_coding	5797
0.0005634	0.0134	976.95	808.93	603.44	659.15	8076272	(3, 1), (4, 1)	ST13	ENSG00000100380	ST13 Hsp70 interacting protein [Source:HGNC Symbol;Acc:HGNC:11343]	chr22	40824535	40856639	-1	q13.2	38.21	protein_coding	3764
0.0061354	0.0619	245.27	234.01	140.58	187.39	8073334	(3, 1), (3, 2)	RBX1	ENSG00000100387	ring-box 1 [Source:HGNC Symbol;Acc:HGNC:9928]	chr22	40951347	40973309	1	q13.2	44.92	protein_coding	3092
0.0013036	0.0236	367.66	274.83	208.16	236.69	8073345	(3, 1), (4, 1)	EP300	ENSG00000100393	E1A binding protein p300 [Source:HGNC Symbol;Acc:HGNC:3373]	chr22	41092592	41180077	1	q13.2	42.02	protein_coding	11692
0.0082501	0.0733	392.69	216.28	172.06	253.29	7979085	(2, 1), (3, 1)	PYGL	ENSG00000100504	glycogen phosphorylase L [Source:HGNC Symbol;Acc:HGNC:9725]	chr14	50857891	50944483	-1	q22.1	42.37	protein_coding	4546
0.0002694	0.00829	245.92	152.47	156.52	115.7	7979473	(4, 1)	DHRS7	ENSG00000100612	dehydrogenase/reductase 7 [Source:HGNC Symbol;Acc:HGNC:21524]	chr14	60144119	60169856	-1	q23.1	39.65	protein_coding	3249
0.0060318	0.0615	789.56	930.02	524.93	685.69	7979864	(3, 2)	ERH	ENSG00000100632	ERH mRNA splicing and mitosis factor [Source:HGNC Symbol;Acc:HGNC:3447]	chr14	69380128	69398299	-1	q24.1	40.2	protein_coding	1113
2e-07	4.2e-05	981.74	414.6	320.82	435.3	7974851	(2, 1), (3, 1), (4, 1)	HIF1A	ENSG00000100644	hypoxia inducible factor 1 subunit alpha [Source:HGNC Symbol;Acc:HGNC:4910]	chr14	61695513	61748259	1	q23.2	37.25	protein_coding	5151
0.00171	0.028	122.77	178.6	87.39	170.04	7976621	(3, 2), (3, 4)	VRK1	ENSG00000100749	VRK serine/threonine kinase 1 [Source:HGNC Symbol;Acc:HGNC:12718]	chr14	96797304	96954846	1	q32.2	40.26	protein_coding	31679
0.0011619	0.0222	767.77	524.14	305.84	584.59	7978644	(3, 1), (3, 4)	NFKBIA	ENSG00000100906	NFKB inhibitor alpha [Source:HGNC Symbol;Acc:HGNC:7797]	chr14	35401513	35404749	-1	q13.2	56.53	protein_coding	2371
3.66e-05	0.00198	147.68	242.29	221.46	303.65	7973629	(1, 2), (1, 4)	REC8	ENSG00000100918	REC8 meiotic recombination protein [Source:HGNC Symbol;Acc:HGNC:16879]	chr14	24171853	24180257	1	q12	55.21	protein_coding	3844
0.0022591	0.0338	427.18	320.06	179.78	404.53	8066619	(3, 1), (3, 4)	PLTP	ENSG00000100979	phospholipid transfer protein [Source:HGNC Symbol;Acc:HGNC:9093]	chr20	45898621	45912155	-1	q13.12	51.86	protein_coding	2541
0.0005196	0.0127	275.89	224.87	405.95	261.03	8061447	(2, 3), (4, 3)	PYGB	ENSG00000100994	glycogen phosphorylase B [Source:HGNC Symbol;Acc:HGNC:9723]	chr20	25248085	25298012	1	p11.21	52.16	protein_coding	4456
0.0012361	0.0231	145.93	89.11	146.25	94.4	8062728	(2, 1), (4, 1), (2, 3), (4, 3)	SGK2	ENSG00000101049	serum/glucocorticoid regulated kinase 2 [Source:HGNC Symbol;Acc:HGNC:13900]	chr20	43558968	43588237	1	q13.12	49.23	protein_coding	5140
6.24e-05	0.00289	83.59	112	81.55	187.07	8063458	(1, 4), (2, 4), (3, 4)	DOK5	ENSG00000101134	docking protein 5 [Source:HGNC Symbol;Acc:HGNC:16173]	chr20	54475593	54651169	1	q13.2	39.92	protein_coding	2606
0.0005021	0.0125	539.24	342.55	258.54	385.76	8061542	(2, 1), (3, 1), (3, 4)	HM13	ENSG00000101294	histocompatibility minor 13 [Source:HGNC Symbol;Acc:HGNC:16435]	chr20	31514410	31577923	1	q11.21	49.85	protein_coding	8766
0.0069077	0.066	204.36	191.89	162.32	243.99	8061706	(3, 4)	POFUT1	ENSG00000101346	protein O-fucosyltransferase 1 [Source:HGNC Symbol;Acc:HGNC:14988]	chr20	32207880	32238658	1	q11.21	47.66	protein_coding	6417
0.008515	0.0747	195.67	256.33	162.93	390.11	8066117	(3, 4)	SAMHD1	ENSG00000101347	SAM and HD domain containing deoxynucleoside triphosphate triphosphohydrolase 1 [Source:HGNC Symbol;Acc:HGNC:15925]	chr20	36890229	36951893	-1	q11.23	43.83	protein_coding	10835
0.000416	0.011	191.33	356.65	231.72	479.15	8063000	(1, 4), (3, 4)	WFDC2	ENSG00000101443	WAP four-disulfide core domain 2 [Source:HGNC Symbol;Acc:HGNC:15939]	chr20	45469753	45481532	1	q13.12	46.72	protein_coding	1335
0.0098557	0.0812	46.48	45.77	71.62	44.77	8020806	(2, 3), (4, 3)	RNF125	ENSG00000101695	ring finger protein 125 [Source:HGNC Symbol;Acc:HGNC:21150]	chr18	32018825	32073219	1	q12.1	42.32	protein_coding	6061
0.0033725	0.0427	247.09	228.38	182.25	166.28	8021275	(4, 1), (4, 2)	POLI	ENSG00000101751	DNA polymerase iota [Source:HGNC Symbol;Acc:HGNC:9182]	chr18	54269517	54321266	1	q21.2	36.4	protein_coding	9358
0.0079478	0.0716	167.08	211.25	96.61	204.8	8020468	(3, 2), (3, 4)	RBBP8	ENSG00000101773	RB binding protein 8, endonuclease [Source:HGNC Symbol;Acc:HGNC:9891]	chr18	22798261	23026488	1	q11.2	37.83	protein_coding	5078
0.0007745	0.0169	205.16	202.38	151.53	344.36	8171172	(2, 4), (3, 4)	MXRA5	ENSG00000101825	matrix remodeling associated 5 [Source:HGNC Symbol;Acc:HGNC:7539]	chrX	3308565	3346652	-1	p22.33	43.18	protein_coding	9804
0.0006415	0.0148	160.55	91.71	83.98	90.45	8165911	(2, 1), (3, 1), (4, 1)	TBL1X	ENSG00000101849	transducin beta like 1 X-linked [Source:HGNC Symbol;Acc:HGNC:11585]	chrX	9463320	9741037	1	p22.31	45.27	protein_coding	13858
0.0001324	0.00504	169.25	116.08	91.19	94.19	8175492	(3, 1), (4, 1)	ATP11C	ENSG00000101974	ATPase phospholipid transporting 11C [Source:HGNC Symbol;Acc:HGNC:13554]	chrX	139726346	139945276	-1	q27.1	39.51	protein_coding	7407
1.36e-05	0.000951	419.05	116.27	186.62	109.9	8169473	(2, 1), (4, 1)	PLS3	ENSG00000102024	plastin 3 [Source:HGNC Symbol;Acc:HGNC:9091]	chrX	115561174	115650861	1	q23	38.9	protein_coding	4099
0.0070484	0.067	292.58	248.65	155.62	269.03	8170326	(3, 1), (3, 4)	FMR1	ENSG00000102081	FMRP translational regulator 1 [Source:HGNC Symbol;Acc:HGNC:3775]	chrX	147911919	147951125	1	q27.3	36.37	protein_coding	8951
0.0080234	0.0719	369.18	339.47	186.33	277.31	8173713	(3, 1), (3, 2)	MAGT1	ENSG00000102158	magnesium transporter 1 [Source:HGNC Symbol;Acc:HGNC:28880]	chrX	77825747	77895593	-1	q21.1	40.86	protein_coding	5479
7e-05	0.00316	62.83	54.58	74.16	40.47	8166408	(4, 1), (4, 3)	PHEX	ENSG00000102174	phosphate regulating endopeptidase homolog X-linked [Source:HGNC Symbol;Acc:HGNC:8918]	chrX	22032325	22494713	1	p22.11	39.58	protein_coding	10399
0.0055627	0.059	321.7	220.58	152.84	276.1	8167103	(3, 1), (3, 4)	CDK16	ENSG00000102225	cyclin dependent kinase 16 [Source:HGNC Symbol;Acc:HGNC:8749]	chrX	47217860	47229997	1	p11.3	54.42	protein_coding	6531
0.0065872	0.0646	324.16	319.79	215.14	389.3	8167125	(3, 4)	USP11	ENSG00000102226	ubiquitin specific peptidase 11 [Source:HGNC Symbol;Acc:HGNC:12609]	chrX	47232866	47248328	1	p11.3	48.29	protein_coding	5093
0.0078752	0.0711	133.56	100.87	103.12	88.32	8168447	(4, 1)	PBDC1	ENSG00000102390	polysaccharide biosynthesis domain containing 1 [Source:HGNC Symbol;Acc:HGNC:28790]	chrX	76173040	76178314	1	q13.3	42.16	protein_coding	1207
1.1e-06	0.000159	171.89	282.69	108.79	284.29	8169009	(1, 2), (1, 4), (3, 2), (3, 4)	BEX4	ENSG00000102409	brain expressed X-linked 4 [Source:HGNC Symbol;Acc:HGNC:25475]	chrX	103215108	103217246	1	q22.1	51.94	protein_coding	1312
2e-07	4.2e-05	188.46	166.55	150.13	552.82	7992071	(1, 4), (2, 4), (3, 4)	MSLN	ENSG00000102854	mesothelin [Source:HGNC Symbol;Acc:HGNC:7371]	chr16	760734	768865	1	p13.3	66.92	protein_coding	2588
3.59e-05	0.00196	424.04	256.51	164.66	212.93	8003298	(2, 1), (3, 1), (4, 1)	SLC7A5	ENSG00000103257	solute carrier family 7 member 5 [Source:HGNC Symbol;Acc:HGNC:11063]	chr16	87830023	87869507	-1	q24.2	58.42	protein_coding	4764
0.001453	0.0254	81.29	84.85	156.13	75.04	8001394	(1, 3), (2, 3), (4, 3)	TOX3	ENSG00000103460	TOX high mobility group box family member 3 [Source:HGNC Symbol;Acc:HGNC:11972]	chr16	52436417	52547802	-1	q12.1	38.66	protein_coding	6754
0.0001471	0.00534	120.75	123.82	364.92	101.54	7993638	(1, 3), (2, 3), (4, 3)	TMC5	ENSG00000103534	transmembrane channel like 5 [Source:HGNC Symbol;Acc:HGNC:22999]	chr16	19410496	19499113	1	p12.3	45.06	protein_coding	6206
2e-07	4.2e-05	141.61	241.33	71.81	247.16	7988444	(3, 1), (1, 4), (3, 2), (3, 4)	MYEF2	ENSG00000104177	myelin expression factor 2 [Source:HGNC Symbol;Acc:HGNC:17940]	chr15	48134632	48178353	-1	q21.1	33.78	protein_coding	13902
0.0033385	0.0424	142.85	106.89	196.75	103.27	8147132	(2, 3), (4, 3)	CA2	ENSG00000104267	carbonic anhydrase 2 [Source:HGNC Symbol;Acc:HGNC:1373]	chr8	85463968	85481493	1	q21.2	38.44	protein_coding	2007
0.0001855	0.00653	136.16	228.14	113.59	258.86	8145611	(1, 4), (3, 2), (3, 4)	FZD3	ENSG00000104290	frizzled class receptor 3 [Source:HGNC Symbol;Acc:HGNC:4041]	chr8	28494205	28574267	1	p21.1	36.28	protein_coding	13786
0.0033291	0.0424	260.34	157.86	87.61	145.42	8147206	(3, 1), (4, 1)	RIPK2	ENSG00000104312	receptor interacting serine/threonine kinase 2 [Source:HGNC Symbol;Acc:HGNC:10020]	chr8	89757806	89791064	1	q21.3	35.92	protein_coding	3059
0.003047	0.0403	206.16	108.52	65.39	116.25	8150906	(3, 1)	BPNT2	ENSG00000104331	3'(2'), 5'-bisphosphate nucleotidase 2 [Source:HGNC Symbol;Acc:HGNC:26019]	chr8	56957931	56993867	-1	q12.1	38.23	protein_coding	7619
0.0089337	0.0768	364.52	219.5	138.78	253.61	8150908	(3, 1)	BPNT2	ENSG00000104331	3'(2'), 5'-bisphosphate nucleotidase 2 [Source:HGNC Symbol;Acc:HGNC:26019]	chr8	56957931	56993867	-1	q12.1	38.23	protein_coding	7619
0.0010824	0.0214	671.99	728.58	309.47	957.31	8147503	(3, 2), (3, 4)	LAPTM4B	ENSG00000104341	lysosomal protein transmembrane 4 beta [Source:HGNC Symbol;Acc:HGNC:13646]	chr8	97775057	97853013	1	q22.1	44	protein_coding	3197
0.001229	0.0231	804.58	384.89	292.56	503.26	8146564	(2, 1), (3, 1)	RAB2A	ENSG00000104388	RAB2A, member RAS oncogene family [Source:HGNC Symbol;Acc:HGNC:9763]	chr8	60516936	60623644	1	q12.1	39.15	protein_coding	5592
1.44e-05	0.00098	2147.64	578.26	822.94	709.06	8153002	(2, 1), (3, 1), (4, 1)	NDRG1	ENSG00000104419	N-myc downstream regulated 1 [Source:HGNC Symbol;Acc:HGNC:7679]	chr8	133237175	133302022	-1	q24.22	50.32	protein_coding	12002
5.3e-06	0.000524	141.46	70.07	51.24	61.23	8144516	(2, 1), (3, 1), (4, 1)	ERI1	ENSG00000104626	exoribonuclease 1 [Source:HGNC Symbol;Acc:HGNC:23994]	chr8	9002147	9116746	1	p23.1	41.64	protein_coding	6382
0.002727	0.0376	78.4	61.09	118.92	59.64	8145691	(2, 3), (4, 3)	UBXN8	ENSG00000104691	UBX domain protein 8 [Source:HGNC Symbol;Acc:HGNC:30307]	chr8	30729131	30767006	1	p12	44.55	protein_coding	4151
0.0003734	0.0102	489.75	485.43	139.67	471.19	8144726	(3, 1), (3, 2), (3, 4)	TUSC3	ENSG00000104723	tumor suppressor candidate 3 [Source:HGNC Symbol;Acc:HGNC:30242]	chr8	15417215	15766649	1	p22	36.98	protein_coding	5190
0.009949	0.0817	168.69	174.92	129.99	229.47	8039340	(3, 4)	TNNT1	ENSG00000105048	troponin T1, slow skeletal type [Source:HGNC Symbol;Acc:HGNC:11948]	chr19	55132698	55149206	-1	q13.42	55.48	protein_coding	2119
0.0075918	0.0695	339.12	381.64	238.16	440.68	8027416	(3, 4)	URI1	ENSG00000105176	URI1 prefoldin like chaperone [Source:HGNC Symbol;Acc:HGNC:13236]	chr19	29923644	30016612	1	q12	37.88	protein_coding	5448
0.0004712	0.0121	283.98	237.15	156.69	303.72	8032926	(3, 1), (3, 4)	PTPRS	ENSG00000105426	protein tyrosine phosphatase receptor type S [Source:HGNC Symbol;Acc:HGNC:9681]	chr19	5158495	5340803	-1	p13.3	52.47	protein_coding	8565
0.0001084	0.00434	241.03	210.04	168.66	368.5	8035465	(2, 4), (3, 4)	ISYNA1	ENSG00000105655	inositol-3-phosphate synthase 1 [Source:HGNC Symbol;Acc:HGNC:29821]	chr19	18434388	18438167	-1	p13.11	66.22	protein_coding	3150
0.0058872	0.0607	76.78	106.29	90.74	116.63	8037103	(1, 4)	GRIK5	ENSG00000105737	glutamate ionotropic receptor kainate type subunit 5 [Source:HGNC Symbol;Acc:HGNC:4583]	chr19	41998321	42069498	-1	q13.2	51.51	protein_coding	5014
0.0009884	0.0202	268.31	96.6	48.91	82.85	8141016	(2, 1), (3, 1), (4, 1)	TFPI2	ENSG00000105825	tissue factor pathway inhibitor 2 [Source:HGNC Symbol;Acc:HGNC:11761]	chr7	93885396	93890753	-1	q21.3	38.19	protein_coding	2444
3.46e-05	0.00192	543.3	348.63	229.53	754.24	8131666	(2, 4), (3, 4)	ITGB8	ENSG00000105855	integrin subunit beta 8 [Source:HGNC Symbol;Acc:HGNC:6163]	chr7	20330702	20415754	1	p21.1	37.44	protein_coding	15156
3.5e-06	0.0004	403.24	170.98	159.79	269.01	8143070	(2, 1), (3, 1), (2, 4), (3, 4)	WDR91	ENSG00000105875	WD repeat domain 91 [Source:HGNC Symbol;Acc:HGNC:24997]	chr7	135183839	135211555	-1	q33	47.4	protein_coding	16225
0.0048395	0.054	170.24	126.02	107.38	74.28	8141140	(4, 1)	DLX5	ENSG00000105880	distal-less homeobox 5 [Source:HGNC Symbol;Acc:HGNC:2918]	chr7	97020396	97024950	-1	q21.3	55.68	protein_coding	1744
0.0028553	0.0386	388.63	238.64	181.58	269.69	8143279	(2, 1), (3, 1)	ZC3HAV1	ENSG00000105939	zinc finger CCCH-type containing, antiviral 1 [Source:HGNC Symbol;Acc:HGNC:23721]	chr7	139043515	139132122	-1	q34	43.39	protein_coding	8466
7e-06	0.000626	448.93	181.46	292.06	105.18	8135601	(2, 1), (4, 1), (4, 3)	MET	ENSG00000105976	MET proto-oncogene, receptor tyrosine kinase [Source:HGNC Symbol;Acc:HGNC:7029]	chr7	116672196	116798377	1	q31.2	39.1	protein_coding	7224
0.009303	0.078	1251.24	912.43	646.65	1277.12	8133721	(3, 4)	HSPB1	ENSG00000106211	heat shock protein family B (small) member 1 [Source:HGNC Symbol;Acc:HGNC:5246]	chr7	76302673	76304295	1	q11.23	63.65	protein_coding	1623
5.2e-06	0.000519	46.15	56.97	215.71	58.1	8141328	(1, 3), (2, 3), (4, 3)	CYP3A5	ENSG00000106258	cytochrome P450 family 3 subfamily A member 5 [Source:HGNC Symbol;Acc:HGNC:2638]	chr7	99648194	99679998	-1	q22.1	40.47	protein_coding	9817
0.0080756	0.0722	165.97	221.19	170.98	143.96	8131496	(4, 2)	GLCCI1	ENSG00000106415	glucocorticoid induced 1 [Source:HGNC Symbol;Acc:HGNC:18713]	chr7	7968796	8094272	1	p21.3	36.7	protein_coding	6883
< 1e-07	< 1e-07	362.31	97.09	996.8	51.02	8138381	(2, 1), (4, 1), (2, 3), (4, 3)	AGR2	ENSG00000106541	anterior gradient 2, protein disulphide isomerase family member [Source:HGNC Symbol;Acc:HGNC:328]	chr7	16791811	16833433	-1	p21.1	38.42	protein_coding	2764
0.0082636	0.0734	141.4	190.88	103.57	167.79	8143957	(3, 2), (3, 4)	RHEB	ENSG00000106615	Ras homolog, mTORC1 binding [Source:HGNC Symbol;Acc:HGNC:10011]	chr7	151466012	151520120	-1	q36.1	42	protein_coding	3533
0.0002037	0.00691	58.06	71.57	117.54	58.63	8154135	(1, 3), (2, 3), (4, 3)	SLC1A1	ENSG00000106688	solute carrier family 1 member 1 [Source:HGNC Symbol;Acc:HGNC:10939]	chr9	4490468	4587469	1	p24.2	42.11	protein_coding	3974
0.0015993	0.0272	484.19	509.68	314.39	610.5	8156263	(3, 4)	SPIN1	ENSG00000106723	spindlin 1 [Source:HGNC Symbol;Acc:HGNC:11243]	chr9	88388430	88478694	1	q22.1	41.25	protein_coding	4903
0.0078822	0.0711	112	105.35	63.06	156.66	8160559	(3, 4)	DDX58	ENSG00000107201	DExD/H-box helicase 58 [Source:HGNC Symbol;Acc:HGNC:19102]	chr9	32455302	32526208	-1	p21.1	39.59	protein_coding	10345
< 1e-07	< 1e-07	32.42	49.98	80.71	28.69	8155673	(1, 2), (1, 3), (2, 3), (4, 2), (4, 3)	PIP5K1B	ENSG00000107242	phosphatidylinositol-4-phosphate 5-kinase type 1 beta [Source:HGNC Symbol;Acc:HGNC:8995]	chr9	68705240	69009176	1	q21.11	40.24	protein_coding	5092
0.0007189	0.016	605.78	451.08	274.32	502.03	8161747	(3, 1), (3, 2), (3, 4)	ZFAND5	ENSG00000107372	zinc finger AN1-type containing 5 [Source:HGNC Symbol;Acc:HGNC:13008]	chr9	72351413	72365235	-1	q21.13	39.89	protein_coding	7065
0.0004025	0.0108	71.07	50.38	88.03	35.79	7930714	(4, 1), (4, 3)	ATRNL1	ENSG00000107518	attractin like 1 [Source:HGNC Symbol;Acc:HGNC:29063]	chr10	115093365	115948999	1	q25.3	35.41	protein_coding	9957
0.0012132	0.0229	137.33	114.66	162.49	98.21	7935660	(4, 1), (4, 3)	DNMBP	ENSG00000107554	dynamin binding protein [Source:HGNC Symbol;Acc:HGNC:30373]	chr10	99875577	100009947	-1	q24.2	43.71	protein_coding	8489
0.0012495	0.0232	125.82	150.47	128.36	217.45	7934215	(1, 4), (3, 4)	SPOCK2	ENSG00000107742	SPARC (osteonectin), cwcv and kazal like domains proteoglycan 2 [Source:HGNC Symbol;Acc:HGNC:13564]	chr10	72059034	72089032	-1	q22.1	55.97	protein_coding	6411
4.52e-05	0.00232	410.14	439.78	279.24	722.1	7933760	(1, 4), (2, 4), (3, 4)	CCDC6	ENSG00000108091	coiled-coil domain containing 6 [Source:HGNC Symbol;Acc:HGNC:18782]	chr10	59788747	59906556	-1	q21.2	40.9	protein_coding	7261
0.00496	0.0549	515.22	319.24	533.69	315.34	8006984	(4, 1), (4, 3)	PSMD3	ENSG00000108344	proteasome 26S subunit, non-ATPase 3 [Source:HGNC Symbol;Acc:HGNC:9560]	chr17	39980807	39997959	1	q21.1	49.73	protein_coding	4953
3e-06	0.000363	90.23	87.55	257.61	81.32	8007043	(1, 3), (2, 3), (4, 3)	RAPGEFL1	ENSG00000108352	Rap guanine nucleotide exchange factor like 1 [Source:HGNC Symbol;Acc:HGNC:17428]	chr17	40177010	40195656	1	q21.1	54.16	protein_coding	5736
0.0026938	0.0374	115.62	237.96	186.11	174.07	8016994	(1, 2)	RNF43	ENSG00000108375	ring finger protein 43 [Source:HGNC Symbol;Acc:HGNC:18505]	chr17	58353676	58417595	-1	q22	43.02	protein_coding	6329
0.0004852	0.0123	220.25	191.42	297.21	130.8	8016463	(4, 3)	HOXB6	ENSG00000108511	homeobox B6 [Source:HGNC Symbol;Acc:HGNC:5117]	chr17	48595751	48604992	-1	q21.32	54.06	protein_coding	2604
2.34e-05	0.00142	153.34	108.13	132.29	90.09	8013112	(2, 1), (4, 1), (4, 3)	RASD1	ENSG00000108551	ras related dexamethasone induced 1 [Source:HGNC Symbol;Acc:HGNC:15828]	chr17	17494437	17496395	-1	p11.2	62.89	protein_coding	1748
0.0068519	0.0657	520.98	314.32	277.71	336	8017421	(2, 1), (3, 1), (4, 1)	CCDC47	ENSG00000108588	coiled-coil domain containing 47 [Source:HGNC Symbol;Acc:HGNC:24856]	chr17	63745255	63776351	-1	q23.3	42.02	protein_coding	4354
4e-07	6.97e-05	225.28	129.72	346.97	119.26	8008454	(2, 1), (4, 1), (2, 3), (4, 3)	ABCC3	ENSG00000108846	ATP binding cassette subfamily C member 3 [Source:HGNC Symbol;Acc:HGNC:54]	chr17	50634777	50692253	1	q21.33	51.95	protein_coding	9615
0.0001035	0.00427	247.69	99.31	83.25	129.09	8017867	(2, 1), (3, 1), (4, 1)	FAM20A	ENSG00000108950	FAM20A golgi associated secretory pathway pseudokinase [Source:HGNC Symbol;Acc:HGNC:23015]	chr17	68535113	68601367	-1	q24.2	44.82	protein_coding	6181
0.0096194	0.0798	1605.35	1807.74	949.17	1689.97	8011011	(3, 2), (3, 4)	YWHAE	ENSG00000108953	tyrosine 3-monooxygenase/tryptophan 5-monooxygenase activation protein epsilon [Source:HGNC Symbol;Acc:HGNC:12851]	chr17	1344275	1400222	-1	p13.3	44.73	protein_coding	3688
0.0049372	0.0547	128.67	166.11	182.96	97.4	8009476	(4, 2), (4, 3)	MAP2K6	ENSG00000108984	mitogen-activated protein kinase kinase 6 [Source:HGNC Symbol;Acc:HGNC:6846]	chr17	69414697	69553865	1	q24.3	40.75	protein_coding	16660
0.0015264	0.0263	718.95	327.94	342.49	333.13	8005765	(2, 1), (3, 1), (4, 1)	WSB1	ENSG00000109046	WD repeat and SOCS box containing 1 [Source:HGNC Symbol;Acc:HGNC:19221]	chr17	27294076	27315926	1	q11.1	39.73	protein_coding	8602
0.0063051	0.0628	66.48	50.69	64.8	39.7	8101587	(4, 1)	MAPK10	ENSG00000109339	mitogen-activated protein kinase 10 [Source:HGNC Symbol;Acc:HGNC:6872]	chr4	85990007	86594625	-1	q21.3	37.37	protein_coding	42623
6.3e-06	0.000573	184.41	135.04	332.51	142.89	8103166	(1, 3), (2, 3), (4, 3)	SH3D19	ENSG00000109686	SH3 domain containing 19 [Source:HGNC Symbol;Acc:HGNC:30418]	chr4	151102751	151325605	-1	q31.3	40.78	protein_coding	7762
0.0007257	0.0161	535.1	309.8	287.51	208.93	8099897	(4, 1)	UGDH	ENSG00000109814	UDP-glucose 6-dehydrogenase [Source:HGNC Symbol;Acc:HGNC:12525]	chr4	39498755	39528311	-1	p14	41.86	protein_coding	4025
0.0089446	0.0768	198.99	99.22	81.18	105.16	7944656	(2, 1), (3, 1), (4, 1)	SC5D	ENSG00000109929	sterol-C5-desaturase [Source:HGNC Symbol;Acc:HGNC:10547]	chr11	121292681	121313410	1	q23.3	38.3	protein_coding	10054
0.0002119	0.00706	133.6	160.52	123.3	298.79	7942332	(1, 4), (2, 4), (3, 4)	FOLR1	ENSG00000110195	folate receptor alpha [Source:HGNC Symbol;Acc:HGNC:3791]	chr11	72189558	72196323	1	q13.4	50.62	protein_coding	1601
0.0016728	0.0278	564.15	589.74	313.62	511.63	7952103	(3, 1), (3, 2), (3, 4)	DDX6	ENSG00000110367	DEAD-box helicase 6 [Source:HGNC Symbol;Acc:HGNC:2747]	chr11	118747763	118791164	-1	q23.3	41.56	protein_coding	11462
0.0056577	0.0596	117.08	128.65	117.28	188.27	7948493		SLC15A3	ENSG00000110446	solute carrier family 15 member 3 [Source:HGNC Symbol;Acc:HGNC:18068]	chr11	60937060	60952653	-1	q12.2	52.91	protein_coding	6949
0.0004152	0.011	1148.91	829.78	503.59	1162.95	7937802	(3, 1), (3, 4)	CD81	ENSG00000110651	CD81 molecule [Source:HGNC Symbol;Acc:HGNC:1701]	chr11	2376177	2397397	1	p15.5	63.43	protein_coding	7356
0.0042758	0.0496	251.25	195.75	140.73	173.16	7963235	(3, 1), (4, 1)	CSRNP2	ENSG00000110925	cysteine and serine rich nuclear protein 2 [Source:HGNC Symbol;Acc:HGNC:16006]	chr12	51061205	51083664	-1	q13.12	46.64	protein_coding	5230
0.0068205	0.0656	314.2	286.8	158.15	317.67	7965627	(3, 1), (3, 2), (3, 4)	LTA4H	ENSG00000111144	leukotriene A4 hydrolase [Source:HGNC Symbol;Acc:HGNC:6710]	chr12	96000753	96043520	-1	q23.1	39.07	protein_coding	7405
0.0026825	0.0373	344.97	390.53	276.1	450.56	7967412	(3, 4)	CDK2AP1	ENSG00000111328	cyclin dependent kinase 2 associated protein 1 [Source:HGNC Symbol;Acc:HGNC:14002]	chr12	123250112	123272334	-1	q24.31	53.31	protein_coding	6027
0.0068618	0.0657	938.14	715.05	372.54	847.03	7962516	(3, 1), (3, 4)	SLC38A1	ENSG00000111371	solute carrier family 38 member 1 [Source:HGNC Symbol;Acc:HGNC:13447]	chr12	46183063	46270017	-1	q13.11	39.96	protein_coding	10015
0.0090111	0.0769	484.5	450.99	302.55	497.99	7956088	(3, 1), (3, 4)	RAB5B	ENSG00000111540	RAB5B, member RAS oncogene family [Source:HGNC Symbol;Acc:HGNC:9784]	chr12	55973913	55996683	1	q13.2	46.01	protein_coding	6525
0.0039724	0.0477	182.09	184.13	96.07	198.01	7956949	(3, 1), (3, 2), (3, 4)	NUP107	ENSG00000111581	nucleoporin 107 [Source:HGNC Symbol;Acc:HGNC:29914]	chr12	68686951	68745809	1	q15	39.25	protein_coding	8103
0.0035375	0.0442	5430.03	3876.98	2853.24	5021.27	7953385	(3, 1), (3, 4)	GAPDH	ENSG00000111640	glyceraldehyde-3-phosphate dehydrogenase [Source:HGNC Symbol;Acc:HGNC:4141]	chr12	6534512	6538374	1	p13.31	59.98	protein_coding	2396
0.0010478	0.0211	1457.53	1229.37	388.35	966.48	7961693	(3, 1), (3, 2), (3, 4)	LDHB	ENSG00000111716	lactate dehydrogenase B [Source:HGNC Symbol;Acc:HGNC:6541]	chr12	21635342	21757857	-1	p12.1	38.01	protein_coding	2983
0.0039144	0.0472	148.56	82.98	72.01	66.15	8116835	(4, 1)	GCNT2	ENSG00000111846	glucosaminyl (N-acetyl) transferase 2 (I blood group) [Source:HGNC Symbol;Acc:HGNC:4204]	chr6	10492223	10629368	1	p24.3	43.51	protein_coding	9230
0.0096693	0.08	161.13	97.43	104.46	98.82	8121861	(2, 1), (4, 1)	NCOA7	ENSG00000111912	nuclear receptor coactivator 7 [Source:HGNC Symbol;Acc:HGNC:21081]	chr6	125781161	125932034	1	q22.31	39.05	protein_coding	7647
1.07e-05	0.00084	278.31	139.1	141.88	136.86	8122637	(2, 1), (3, 1), (4, 1)	SASH1	ENSG00000111961	SAM and SH3 domain containing 1 [Source:HGNC Symbol;Acc:HGNC:19182]	chr6	148272304	148552048	1	q24.3	43.29	protein_coding	10896
0.0080394	0.072	181.74	122.89	89.35	123.11	8119000	(3, 1)	MAPK14	ENSG00000112062	mitogen-activated protein kinase 14 [Source:HGNC Symbol;Acc:HGNC:6876]	chr6	36027677	36111236	1	p21.31	39.88	protein_coding	6860
0.0005223	0.0127	140.37	140.52	140.14	88.44	8120402	(4, 1), (4, 2)	BAG2	ENSG00000112208	BAG cochaperone 2 [Source:HGNC Symbol;Acc:HGNC:938]	chr6	57172326	57189833	1	p12.1	38.77	protein_coding	6651
2.44e-05	0.00148	480.91	288.59	251	218.7	8120431	(2, 1), (3, 1), (4, 1)	PTP4A1	ENSG00000112245	protein tyrosine phosphatase 4A1 [Source:HGNC Symbol;Acc:HGNC:9634]	chr6	63521746	63583588	1	q12	39.41	protein_coding	5914
0.0059537	0.0611	175.9	149.95	188.62	105.47	8121277		CRYBG1	ENSG00000112297	crystallin beta-gamma domain containing 1 [Source:HGNC Symbol;Acc:HGNC:356]	chr6	106360717	106572017	1	q21	40.14	protein_coding	10981
8.5e-06	0.000705	125.84	110.51	218.56	99.93	8122279	(1, 3), (2, 3), (4, 3)	ARFGEF3	ENSG00000112379	ARFGEF family member 3 [Source:HGNC Symbol;Acc:HGNC:21213]	chr6	138161939	138344663	1	q23.3	41.61	protein_coding	14859
0.0017117	0.028	74.07	78.02	169.98	98.53	8122365	(1, 3), (2, 3), (4, 3)	ADGRG6	ENSG00000112414	adhesion G protein-coupled receptor G6 [Source:HGNC Symbol;Acc:HGNC:13841]	chr6	142301854	142446266	1	q24.2	35.7	protein_coding	8473
0.0010146	0.0206	139.98	103.96	161.99	93.51	8122426	(4, 1), (4, 3)	PHACTR2	ENSG00000112419	phosphatase and actin regulator 2 [Source:HGNC Symbol;Acc:HGNC:20956]	chr6	143536845	143831185	1	q24.2	40.02	protein_coding	11224
0.0018656	0.0296	109.04	111.93	180.84	91.46	8123446	(4, 3)	SMOC2	ENSG00000112562	SPARC related modular calcium binding 2 [Source:HGNC Symbol;Acc:HGNC:20323]	chr6	168441151	168673445	1	q27	47.27	protein_coding	4032
1.52e-05	0.00101	183.84	182.36	432.75	176.2	8123562	(1, 3), (2, 3), (4, 3)	GMDS	ENSG00000112699	GDP-mannose 4,6-dehydratase [Source:HGNC Symbol;Acc:HGNC:4369]	chr6	1623806	2245605	-1	p25.3	40.77	protein_coding	4217
2.2e-06	0.000273	45.61	72.27	58.44	119.23	8126729	(1, 4), (2, 4), (3, 4)	CLIC5	ENSG00000112782	chloride intracellular channel 5 [Source:HGNC Symbol;Acc:HGNC:13517]	chr6	45880827	46080348	-1	p21.1	41.87	protein_coding	10432
0.0055251	0.0588	123.66	119.46	122.65	48.8	8105084	(4, 2)	C7	ENSG00000112936	complement C7 [Source:HGNC Symbol;Acc:HGNC:1346]	chr5	40909497	40984643	1	p13.1	38.19	protein_coding	6682
0.0063804	0.0633	166.75	63.9	48.89	76.38	8113709	(2, 1), (3, 1), (4, 1)	LOX	ENSG00000113083	lysyl oxidase [Source:HGNC Symbol;Acc:HGNC:6664]	chr5	122063195	122078413	-1	q23.1	38.02	protein_coding	5596
3.55e-05	0.00195	466.64	178.41	194.92	164.76	8106280	(2, 1), (3, 1), (4, 1)	HMGCR	ENSG00000113161	3-hydroxy-3-methylglutaryl-CoA reductase [Source:HGNC Symbol;Acc:HGNC:5006]	chr5	75336329	75364001	1	q13.3	38.36	protein_coding	10125
0.0004218	0.0111	131.59	90.73	83.12	79.06	8112807	(2, 1), (3, 1), (4, 1)	ARSB	ENSG00000113273	arylsulfatase B [Source:HGNC Symbol;Acc:HGNC:714]	chr5	78777209	78986087	-1	q14.1	41.01	protein_coding	8899
4.04e-05	0.00213	38.93	39.01	71.96	33.37	8110606	(1, 3), (2, 3), (4, 3)	BTNL8	ENSG00000113303	butyrophilin like 8 [Source:HGNC Symbol;Acc:HGNC:26131]	chr5	180899077	180950906	1	q35.3	40.46	protein_coding	3924
0.0016922	0.0279	167.64	214.96	142.11	239.47	8111286	(3, 4)	DROSHA	ENSG00000113360	drosha ribonuclease III [Source:HGNC Symbol;Acc:HGNC:17904]	chr5	31400494	31532196	-1	p13.3	39.75	protein_coding	7782
< 1e-07	< 1e-07	79.26	127.96	74.25	356.12	8104663	(1, 4), (2, 4), (3, 4)	CDH6	ENSG00000113361	cadherin 6 [Source:HGNC Symbol;Acc:HGNC:1765]	chr5	31193686	31329146	1	p13.3	38.31	protein_coding	12443
0.0056302	0.0595	847.32	544.86	356.08	478.96	8113073	(3, 1), (4, 1)	ARRDC3	ENSG00000113369	arrestin domain containing 3 [Source:HGNC Symbol;Acc:HGNC:29263]	chr5	91368631	91383317	-1	q14.3	35.7	protein_coding	4985
0.0046749	0.0528	220.13	261.94	146.7	270	8111629	(3, 2), (3, 4)	NUP155	ENSG00000113569	nucleoporin 155 [Source:HGNC Symbol;Acc:HGNC:8063]	chr5	37288137	37371106	-1	p13.2	41.74	protein_coding	9158
0.004349	0.0503	240.14	262.93	142.26	325.04	8083709	(3, 4)	SMC4	ENSG00000113810	structural maintenance of chromosomes 4 [Source:HGNC Symbol;Acc:HGNC:14013]	chr3	160399274	160434954	1	q25.33	36.23	protein_coding	8164
0.0031603	0.0412	440.29	391.78	225.85	457.48	8081867	(3, 1), (3, 4)	TIMMDC1	ENSG00000113845	translocase of inner mitochondrial membrane domain containing 1 [Source:HGNC Symbol;Acc:HGNC:1321]	chr3	119498547	119525090	1	q13.33	38.47	protein_coding	2715
4.35e-05	0.00226	186.09	257.53	140.37	298.71	8092691	(1, 4), (3, 2), (3, 4)	BCL6	ENSG00000113916	BCL6 transcription repressor [Source:HGNC Symbol;Acc:HGNC:1001]	chr3	187721377	187745725	-1	q27.3	47.68	protein_coding	5936
3e-07	5.51e-05	271.96	88.29	209.78	61.61	8093278	(2, 1), (4, 1), (4, 3)	HGD	ENSG00000113924	homogentisate 1,2-dioxygenase [Source:HGNC Symbol;Acc:HGNC:4892]	chr3	120628172	120682269	-1	q13.33	41.25	protein_coding	2682
0.0021759	0.0328	102.03	142.15	77.66	262.02	8084788	(1, 4), (3, 4)	CLDN16	ENSG00000113946	claudin 16 [Source:HGNC Symbol;Acc:HGNC:2037]	chr3	190322541	190412138	1	q28	37.26	protein_coding	3330
0.0076516	0.0698	219.13	152.32	145.49	141.56	8090737	(4, 1)	NPHP3	ENSG00000113971	nephrocystin 3 [Source:HGNC Symbol;Acc:HGNC:7907]	chr3	132680609	132722432	-1	q22.1	36.77	protein_coding	11488
0.0006932	0.0157	235.28	165.96	123.97	183.56	8089999	(2, 1), (3, 1), (3, 4)	KPNA1	ENSG00000114030	karyopherin subunit alpha 1 [Source:HGNC Symbol;Acc:HGNC:6394]	chr3	122421902	122514945	-1	q21.1	38.26	protein_coding	8498
0.0037653	0.046	183.9	158.96	87.31	162.69	8090988	(3, 1), (3, 2), (3, 4)	CEP70	ENSG00000114107	centrosomal protein 70 [Source:HGNC Symbol;Acc:HGNC:29972]	chr3	138494344	138594538	-1	q22.3	39.55	protein_coding	4409
0.0056395	0.0595	183.76	223.93	123.63	200.56	8083063	(3, 2), (3, 4)	SLC25A36	ENSG00000114120	solute carrier family 25 member 36 [Source:HGNC Symbol;Acc:HGNC:25554]	chr3	140941830	140980995	1	q23	35.48	protein_coding	10339
0.0026176	0.0368	304.64	249.05	134.03	231.48	8081316	(3, 1), (3, 2), (3, 4)	TFG	ENSG00000114354	trafficking from ER to golgi regulator [Source:HGNC Symbol;Acc:HGNC:11758]	chr3	100709295	100748964	1	q12.2	36.42	protein_coding	12709
0.0041694	0.0491	878.54	823.65	513.07	916.69	8084146	(3, 1), (3, 2), (3, 4)	FXR1	ENSG00000114416	FMR1 autosomal homolog 1 [Source:HGNC Symbol;Acc:HGNC:4023]	chr3	180868141	180982753	1	q26.33	38.94	protein_coding	11874
0.0056163	0.0594	190.43	215.88	101.92	180.47	8089314	(3, 1), (3, 2), (3, 4)	IFT57	ENSG00000114446	intraflagellar transport 57 [Source:HGNC Symbol;Acc:HGNC:17367]	chr3	108160812	108222435	-1	q13.13	35.23	protein_coding	3631
8.23e-05	0.00354	437.09	235.24	163.45	257.5	8081740	(2, 1), (3, 1), (4, 1), (3, 4)	ATP6V1A	ENSG00000114573	ATPase H+ transporting V1 subunit A [Source:HGNC Symbol;Acc:HGNC:851]	chr3	113747033	113812056	1	q13.31	38.21	protein_coding	5116
0.0012634	0.0233	432.15	446.92	275.39	481.21	8090678	(3, 1), (3, 2), (3, 4)	MRPL3	ENSG00000114686	mitochondrial ribosomal protein L3 [Source:HGNC Symbol;Acc:HGNC:10379]	chr3	131462212	131502983	-1	q22.1	35.94	protein_coding	2715
0.0064139	0.0635	248.84	200.42	293.82	205.26	8088776	(2, 3), (4, 3)	FOXP1	ENSG00000114861	forkhead box P1 [Source:HGNC Symbol;Acc:HGNC:3823]	chr3	70954708	71583989	-1	p13	41.11	protein_coding	34819
0.0050472	0.0555	445.26	543.69	293.08	564.7	8053064	(3, 2), (3, 4)	MOB1A	ENSG00000114978	MOB kinase activator 1A [Source:HGNC Symbol;Acc:HGNC:16015]	chr2	74152528	74178898	-1	p13.1	41.02	protein_coding	6440
0.0002	0.00684	816.19	384.23	294.11	370.39	8054771	(2, 1), (3, 1), (4, 1)	SLC35F5	ENSG00000115084	solute carrier family 35 member F5 [Source:HGNC Symbol;Acc:HGNC:23617]	chr2	113705011	113756693	-1	q14.1	36.65	protein_coding	13398
0.0025208	0.0359	229.32	157.2	169.41	117.64	8054872	(4, 1)	TFCP2L1	ENSG00000115112	transcription factor CP2 like 1 [Source:HGNC Symbol;Acc:HGNC:17925]	chr2	121216587	121285202	-1	q14.2	48.53	protein_coding	9367
0.007588	0.0695	188.64	191.19	160.62	265.47	8045816	(3, 4)	GPD2	ENSG00000115159	glycerol-3-phosphate dehydrogenase 2 [Source:HGNC Symbol;Acc:HGNC:4456]	chr2	156435290	156613735	1	q24.1	37.9	protein_coding	7165
0.0037883	0.0462	128.22	59	39.92	51.25	8055980	(3, 1), (4, 1)	CYTIP	ENSG00000115165	cytohesin 1 interacting protein [Source:HGNC Symbol;Acc:HGNC:9506]	chr2	157414619	157488961	-1	q24.1	37.75	protein_coding	3384
0.0037663	0.046	196.98	73.26	108.98	97.95	8056184	(2, 1), (4, 1)	ITGB6	ENSG00000115221	integrin subunit beta 6 [Source:HGNC Symbol;Acc:HGNC:6161]	chr2	160099667	160200313	-1	q24.2	39.26	protein_coding	5785
1.9e-06	0.000244	79.55	53.12	97.7	38.69	8056327	(4, 1), (2, 3), (4, 3)	GRB14	ENSG00000115290	growth factor receptor bound protein 14 [Source:HGNC Symbol;Acc:HGNC:4565]	chr2	164492417	164621482	-1	q24.3	37.01	protein_coding	2987
0.0054213	0.058	263.95	146.25	109.14	170.49	8041179	(2, 1), (3, 1)	CLIP4	ENSG00000115295	CAP-Gly domain containing linker protein family member 4 [Source:HGNC Symbol;Acc:HGNC:26108]	chr2	29097705	29189643	1	p23.2	38.44	protein_coding	7781
0.0001427	0.00522	533.69	507.56	946.78	473.52	8041995	(1, 3), (2, 3), (4, 3)	SPTBN1	ENSG00000115306	spectrin beta, non-erythrocytic 1 [Source:HGNC Symbol;Acc:HGNC:11275]	chr2	54456317	54671446	1	p16.2	42.78	protein_coding	18473
4.64e-05	0.00237	134.27	171.13	323.85	158.47	8049487	(1, 3), (2, 3), (4, 3)	MLPH	ENSG00000115648	melanophilin [Source:HGNC Symbol;Acc:HGNC:29643]	chr2	237485428	237555322	1	q37.3	51.32	protein_coding	7435
0.0070932	0.0672	606.51	801.02	384.93	790.93	8050240	(3, 2), (3, 4)	ODC1	ENSG00000115758	ornithine decarboxylase 1 [Source:HGNC Symbol;Acc:HGNC:8109]	chr2	10439968	10448327	-1	p25.1	45.53	protein_coding	2791
0.0056774	0.0597	166.98	116.24	85.12	125.21	8052798	(3, 1)	AAK1	ENSG00000115977	AP2 associated kinase 1 [Source:HGNC Symbol;Acc:HGNC:19679]	chr2	69457997	69674349	-1	p13.3	41.95	protein_coding	24843
6e-07	9.35e-05	609.57	202.58	344.26	245.93	8041781	(2, 1), (4, 1)	EPAS1	ENSG00000116016	endothelial PAS domain protein 1 [Source:HGNC Symbol;Acc:HGNC:3374]	chr2	46293667	46386697	1	p21	46.71	protein_coding	7291
0.0003217	0.00918	190.35	260.46	184.9	423.86	8042537	(1, 4), (3, 4)	ATP6V1B1	ENSG00000116039	ATPase H+ transporting V1 subunit B1 [Source:HGNC Symbol;Acc:HGNC:853]	chr2	70935900	70965431	1	p13.3	50.19	protein_coding	2656
0.0005134	0.0127	771.54	398.38	450.17	925.67	7916432	(2, 4)	DHCR24	ENSG00000116133	24-dehydrocholesterol reductase [Source:HGNC Symbol;Acc:HGNC:2859]	chr1	54849627	54887195	-1	p32.3	47.67	protein_coding	6214
0.0073231	0.0683	663.35	345.41	430.75	367.92	7907830	(2, 1), (4, 1)	QSOX1	ENSG00000116260	quiescin sulfhydryl oxidase 1 [Source:HGNC Symbol;Acc:HGNC:9756]	chr1	180154869	180204030	1	q25.2	51.85	protein_coding	9276
0.0040964	0.0486	230.58	210.93	190.32	139	7925062	(4, 1), (4, 2)	SIPA1L2	ENSG00000116991	signal induced proliferation associated 1 like 2 [Source:HGNC Symbol;Acc:HGNC:23800]	chr1	232397965	232630571	-1	q42.2	41.29	protein_coding	8552
0.0001804	0.00637	67.12	76.04	81.58	133.67	8180266	(1, 4), (2, 4)	ST6GALNAC5	ENSG00000117069	ST6 N-acetylgalactosaminide alpha-2,6-sialyltransferase 5 [Source:HGNC Symbol;Acc:HGNC:19342]	chr1	76867480	77067546	1	p31.1	39.92	protein_coding	6059
0.0072133	0.0677	208.34	154.16	217.27	163.53	7906863	(2, 3)	UAP1	ENSG00000117143	UDP-N-acetylglucosamine pyrophosphorylase 1 [Source:HGNC Symbol;Acc:HGNC:12457]	chr1	162561506	162599842	1	q23.3	39.68	protein_coding	3437
0.0018221	0.0292	436.87	278.12	310.84	282.24	7913357	(2, 1), (4, 1)	ECE1	ENSG00000117298	endothelin converting enzyme 1 [Source:HGNC Symbol;Acc:HGNC:3146]	chr1	21217247	21345572	-1	p36.12	52.21	protein_coding	7308
0.0077914	0.0707	204.33	179.01	145.72	230.16	7915485	(3, 4)	EBNA1BP2	ENSG00000117395	EBNA1 binding protein 2 [Source:HGNC Symbol;Acc:HGNC:15531]	chr1	43164175	43270936	-1	p34.2	44.38	protein_coding	3561
0.0012804	0.0234	505.94	218.29	634.71	204.77	7901175	(4, 1), (2, 3), (4, 3)	TSPAN1	ENSG00000117472	tetraspanin 1 [Source:HGNC Symbol;Acc:HGNC:20657]	chr1	46175073	46185962	1	p34.1	50.7	protein_coding	2370
0.0025164	0.0359	295.73	206.36	164.73	190.03	7917741	(3, 1), (4, 1)	TMED5	ENSG00000117500	transmembrane p24 trafficking protein 5 [Source:HGNC Symbol;Acc:HGNC:24251]	chr1	93149742	93180516	-1	p22.1	38	protein_coding	9211
< 1e-07	< 1e-07	199.61	88.92	195.4	90.63	7917875	(2, 1), (4, 1), (2, 3), (4, 3)	F3	ENSG00000117525	coagulation factor III, tissue factor [Source:HGNC Symbol;Acc:HGNC:3541]	chr1	94529173	94541759	-1	p21.3	43.36	protein_coding	2886
0.0002953	0.00885	639.31	624.36	326.77	717.54	7907439	(3, 1), (3, 2), (3, 4)	PRDX6	ENSG00000117592	peroxiredoxin 6 [Source:HGNC Symbol;Acc:HGNC:16753]	chr1	173477330	173488815	1	q25.1	40.51	protein_coding	2311
6.3e-06	0.000573	153.64	146.62	230.45	117.91	7909866	(1, 3), (2, 3), (4, 3)	MTARC2	ENSG00000117791	mitochondrial amidoxime reducing component 2 [Source:HGNC Symbol;Acc:HGNC:26064]	chr1	220748225	220784815	1	q41	44.02	protein_coding	2597
0.0026339	0.0369	371.18	530.82	236.06	548.44	7985089	(3, 2), (3, 4)	RCN2	ENSG00000117906	reticulocalbin 2 [Source:HGNC Symbol;Acc:HGNC:9935]	chr15	76931738	76954393	1	q24.3	38.81	protein_coding	9901
0.0051767	0.0564	109.45	94.9	59.53	89.33	8058824	(3, 1), (3, 2), (3, 4)	MREG	ENSG00000118242	melanoregulin [Source:HGNC Symbol;Acc:HGNC:25478]	chr2	215942584	216034096	-1	q35	42.54	protein_coding	3638
0.0038634	0.0468	239.97	135.94	166.48	143.17	8129985	(2, 1), (4, 1)	PLAGL1	ENSG00000118495	PLAG1 like zinc finger 1 [Source:HGNC Symbol;Acc:HGNC:9046]	chr6	143940300	144064599	-1	q24.2	40.32	protein_coding	8733
0.0007576	0.0166	185.62	99.76	105.22	96.44	8129677	(2, 1), (3, 1), (4, 1)	SGK1	ENSG00000118515	serum/glucocorticoid regulated kinase 1 [Source:HGNC Symbol;Acc:HGNC:10810]	chr6	134169248	134318112	-1	q23.2	42.27	protein_coding	9990
1.13e-05	0.000854	85.17	82.95	167.38	65.49	8122176	(1, 3), (2, 3), (4, 3)	TCF21	ENSG00000118526	transcription factor 21 [Source:HGNC Symbol;Acc:HGNC:11632]	chr6	133889113	133895553	1	q23.2	47.65	protein_coding	3679
0.0007452	0.0164	88.77	54.63	53.92	49.11	7956658	(2, 1), (3, 1), (4, 1)	SLC16A7	ENSG00000118596	solute carrier family 16 member 7 [Source:HGNC Symbol;Acc:HGNC:10928]	chr12	59596029	59789855	1	q14.1	35.79	protein_coding	13703
9.78e-05	0.00413	142.93	75.25	90.48	72.66	8113220	(2, 1), (4, 1)	ELL2	ENSG00000118985	elongation factor for RNA polymerase II 2 [Source:HGNC Symbol;Acc:HGNC:17064]	chr5	95885098	95961851	-1	q15	38.08	protein_coding	7108
< 1e-07	< 1e-07	286.25	83.62	225.01	58.08	8155802	(2, 1), (4, 1), (2, 3), (4, 3)	GDA	ENSG00000119125	guanine deaminase [Source:HGNC Symbol;Acc:HGNC:4212]	chr9	72114595	72257193	1	q21.13	40.49	protein_coding	7904
0.0034571	0.0436	366.36	334.96	203.48	380.61	8084971	(3, 1), (3, 2), (3, 4)	SENP5	ENSG00000119231	SUMO specific peptidase 5 [Source:HGNC Symbol;Acc:HGNC:28407]	chr3	196867856	196934714	1	q29	42.03	protein_coding	7035
0.0018592	0.0296	641.78	827.09	405.04	740.91	8158372	(3, 2), (3, 4)	SET	ENSG00000119335	SET nuclear proto-oncogene [Source:HGNC Symbol;Acc:HGNC:10760]	chr9	128683424	128696400	1	q34.11	49.47	protein_coding	4359
0.0027117	0.0375	89.85	116.33	182.35	143.86	8156770	(1, 3), (1, 4)	GALNT12	ENSG00000119514	polypeptide N-acetylgalactosaminyltransferase 12 [Source:HGNC Symbol;Acc:HGNC:19877]	chr9	98807670	98850081	1	q22.33	45.52	protein_coding	3166
0.0051693	0.0564	702.34	764.46	365.18	774.91	7980146	(3, 2), (3, 4)	NPC2	ENSG00000119655	NPC intracellular cholesterol transporter 2 [Source:HGNC Symbol;Acc:HGNC:14537]	chr14	74476192	74494177	-1	q24.3	43.65	protein_coding	2584
0.0001452	0.00529	272.12	217.87	181.5	309.48	7980338	(2, 4), (3, 4)	IRF2BPL	ENSG00000119669	interferon regulatory factor 2 binding protein like [Source:HGNC Symbol;Acc:HGNC:14282]	chr14	77024543	77028708	-1	q24.3	62.84	protein_coding	4166
0.0071182	0.0673	324.19	336.7	239.19	402.57	8051589	(3, 4)	ATL2	ENSG00000119787	atlastin GTPase 2 [Source:HGNC Symbol;Acc:HGNC:24047]	chr2	38293954	38377285	-1	p22.1	39.46	protein_coding	5810
0.0058954	0.0607	95.64	145.09	87	137.65	8052399	(3, 2), (3, 4)	BCL11A	ENSG00000119866	BAF chromatin remodeling complex subunit BCL11A [Source:HGNC Symbol;Acc:HGNC:13221]	chr2	60450520	60554467	-1	p16.1	44.77	protein_coding	24514
0.0060658	0.0616	70.92	80.26	63.48	135.2	7929052		IFIT3	ENSG00000119917	interferon induced protein with tetratricopeptide repeats 3 [Source:HGNC Symbol;Acc:HGNC:5411]	chr10	89327307	89377473	1	q23.31	42.34	protein_coding	5067
0.0001102	0.00435	348.02	210.12	151.98	194.97	8017711	(2, 1), (3, 1), (4, 1)	GNA13	ENSG00000120063	G protein subunit alpha 13 [Source:HGNC Symbol;Acc:HGNC:4381]	chr17	65009289	65056740	-1	q24.1	40.06	protein_coding	6431
0.001926	0.0302	107.93	106.37	132.7	73.1	8016457	(4, 3)	HOXB5	ENSG00000120075	homeobox B5 [Source:HGNC Symbol;Acc:HGNC:5116]	chr17	48591257	48593779	-1	q21.32	54.66	protein_coding	1859
0.0023118	0.0341	247.77	179.92	138.96	295.33	7926545	(2, 4), (3, 4)	PLXDC2	ENSG00000120594	plexin domain containing 2 [Source:HGNC Symbol;Acc:HGNC:21013]	chr10	19816239	20289856	1	p12.31	37.34	protein_coding	12567
0.0086331	0.0756	211.74	153.33	102.96	90.76	7968872	(4, 1)	DNAJC15	ENSG00000120675	DnaJ heat shock protein family (Hsp40) member C15 [Source:HGNC Symbol;Acc:HGNC:20325]	chr13	43023203	43114213	1	q14.11	38.12	protein_coding	8031
6.12e-05	0.00286	521.25	514.3	213.24	971.19	8149927	(3, 4)	CLU	ENSG00000120885	clusterin [Source:HGNC Symbol;Acc:HGNC:2095]	chr8	27596917	27614700	-1	p21.1	49.61	protein_coding	6285
< 1e-07	< 1e-07	1066.2	217.47	226.16	148.62	8146921	(2, 1), (3, 1), (4, 1)	RDH10	ENSG00000121039	retinol dehydrogenase 10 [Source:HGNC Symbol;Acc:HGNC:19975]	chr8	73294602	73325281	1	q21.11	41.69	protein_coding	5331
0.0003115	0.00902	182.54	171.5	286.95	158.48	8008664	(1, 3), (2, 3), (4, 3)	AKAP1	ENSG00000121057	A-kinase anchoring protein 1 [Source:HGNC Symbol;Acc:HGNC:367]	chr17	57085092	57121346	1	q22	49.96	protein_coding	5340
0.0003641	0.0101	663.89	273.36	248.97	239.89	8008646	(2, 1), (3, 1), (4, 1)	SCPEP1	ENSG00000121064	serine carboxypeptidase 1 [Source:HGNC Symbol;Acc:HGNC:29507]	chr17	56978129	57006768	1	q22	45.28	protein_coding	3829
0.0091561	0.0773	155.58	139.78	90.3	133.22	7908169	(3, 1), (3, 2), (3, 4)	RNF2	ENSG00000121481	ring finger protein 2 [Source:HGNC Symbol;Acc:HGNC:10061]	chr1	185045526	185102603	1	q25.3	39.29	protein_coding	3906
0.0008394	0.018	1562.56	1171.83	639.81	1267.17	8089652	(3, 1), (3, 2), (3, 4)	NAA50	ENSG00000121579	N-alpha-acetyltransferase 50, NatE catalytic subunit [Source:HGNC Symbol;Acc:HGNC:29533]	chr3	113716458	113746300	-1	q13.31	37.41	protein_coding	6438
0.0052368	0.0567	211.46	210.46	110.72	202.98	8084016	(3, 1), (3, 2), (3, 4)	PIK3CA	ENSG00000121879	phosphatidylinositol-4,5-bisphosphate 3-kinase catalytic subunit alpha [Source:HGNC Symbol;Acc:HGNC:8975]	chr3	179148114	179240093	1	q26.32	35.78	protein_coding	17189
0.0031942	0.0412	91.27	85.68	47.7	82.86	7918467	(3, 1), (3, 2), (3, 4)	LRIF1	ENSG00000121931	ligand dependent nuclear receptor interacting factor 1 [Source:HGNC Symbol;Acc:HGNC:30299]	chr1	110947190	110963965	-1	p13.3	36.39	protein_coding	3502
0.0075942	0.0695	234.74	340.61	122.94	290.73	8055465	(3, 2), (3, 4)	CXCR4	ENSG00000121966	C-X-C motif chemokine receptor 4 [Source:HGNC Symbol;Acc:HGNC:2561]	chr2	136114349	136118149	-1	q22.1	52.01	protein_coding	2208
0.0041455	0.049	107.54	73.89	81.98	61.52	8106303	(4, 1)	POLK	ENSG00000122008	DNA polymerase kappa [Source:HGNC Symbol;Acc:HGNC:9183]	chr5	75511756	75601144	1	q13.3	36.45	protein_coding	9105
0.001034	0.0209	251.95	253.41	123.37	263.54	8084986	(3, 1), (3, 2), (3, 4)	FYTTD1	ENSG00000122068	forty-two-three domain containing 1 [Source:HGNC Symbol;Acc:HGNC:25407]	chr3	197737179	197787596	1	q29	42.18	protein_coding	7897
0.0032019	0.0413	758.65	471.08	543.84	696.13	7934733	(2, 1), (2, 4)	ANXA11	ENSG00000122359	annexin A11 [Source:HGNC Symbol;Acc:HGNC:535]	chr10	80150889	80205572	-1	q22.3	50.39	protein_coding	8513
0.0027646	0.0379	163.27	186.13	95.25	179.07	7917604	(3, 2), (3, 4)	ZNF644	ENSG00000122482	zinc finger protein 644 [Source:HGNC Symbol;Acc:HGNC:29222]	chr1	90915298	91022272	-1	p22.2	36.39	protein_coding	7604
0.0029899	0.0398	427.3	267.96	233.83	338.45	8143065	(2, 1), (3, 1)	CYREN	ENSG00000122783	cell cycle regulator of NHEJ [Source:HGNC Symbol;Acc:HGNC:22432]	chr7	135092363	135170795	-1	q33	40.03	protein_coding	5321
0.0028031	0.0382	249.94	128.4	119.4	171.7	7928429	(2, 1), (3, 1)	PLAU	ENSG00000122861	plasminogen activator, urokinase [Source:HGNC Symbol;Acc:HGNC:9052]	chr10	73909177	73917496	1	q22.2	53.5	protein_coding	2949
1.44e-05	0.00098	210.28	69.44	71.6	63.49	7927681	(2, 1), (3, 1), (4, 1)	BICC1	ENSG00000122870	BicC family RNA binding protein 1 [Source:HGNC Symbol;Acc:HGNC:19351]	chr10	58512872	58831435	1	q21.1	38	protein_coding	6835
0.0047956	0.0538	153.21	85.59	93.99	101.69	7934050	(2, 1), (4, 1)	SLC25A16	ENSG00000122912	solute carrier family 25 member 16 [Source:HGNC Symbol;Acc:HGNC:10986]	chr10	68477998	68527523	-1	q21.3	43.38	protein_coding	7865
< 1e-07	2.57e-05	142.76	225.12	208.65	561.31	7961891	(1, 4), (2, 4), (3, 4)	BHLHE41	ENSG00000123095	basic helix-loop-helix family member e41 [Source:HGNC Symbol;Acc:HGNC:16617]	chr12	26120030	26125037	-1	p12.1	48.58	protein_coding	3854
0.002077	0.0316	166.84	176.94	188.77	249.94	7954481	(1, 4), (2, 4)	SSPN	ENSG00000123096	sarcospan [Source:HGNC Symbol;Acc:HGNC:11322]	chr12	26121991	26299290	1	p12.1	41.2	protein_coding	6780
0.0001021	0.00425	124.63	149.42	315.69	128.99	7971731	(1, 3), (2, 3), (4, 3)	ATP7B	ENSG00000123191	ATPase copper transporting beta [Source:HGNC Symbol;Acc:HGNC:870]	chr13	51930436	52012125	-1	q14.3	44.7	protein_coding	18808
0.0062355	0.0624	48.82	42.71	49.59	34.8	8169115	(4, 1)	NRK	ENSG00000123572	Nik related kinase [Source:HGNC Symbol;Acc:HGNC:25391]	chrX	105822539	105958610	1	q22.3	35.79	protein_coding	9577
8.3e-06	0.000694	194.22	133.95	115.81	111.59	8166098	(2, 1), (3, 1), (4, 1)	RAB9A	ENSG00000123595	RAB9A, member RAS oncogene family [Source:HGNC Symbol;Acc:HGNC:9792]	chrX	13689128	13710504	1	p22.2	41.6	protein_coding	2113
0.0050227	0.0554	58.41	129.21	67.08	138.19	8067208	(1, 4)	CTCFL	ENSG00000124092	CCCTC-binding factor like [Source:HGNC Symbol;Acc:HGNC:16234]	chr20	57495966	57525652	-1	q13.31	45.43	protein_coding	8928
7.27e-05	0.00325	563.65	327.22	222.76	332.01	8063211	(2, 1), (3, 1), (4, 1)	NCOA3	ENSG00000124151	nuclear receptor coactivator 3 [Source:HGNC Symbol;Acc:HGNC:7670]	chr20	47501887	47656877	1	q13.12	41.15	protein_coding	8417
0.0003938	0.0107	396.66	312.03	278.88	486.95	8063410	(2, 4), (3, 4)	PARD6B	ENSG00000124171	par-6 family cell polarity regulator beta [Source:HGNC Symbol;Acc:HGNC:16245]	chr20	50731580	50756795	1	q13.13	41.04	protein_coding	4690
0.0017405	0.0283	383.85	380.66	178.67	415.32	8063283	(3, 1), (3, 2), (3, 4)	CSE1L	ENSG00000124207	chromosome segregation 1 like [Source:HGNC Symbol;Acc:HGNC:2431]	chr20	49046246	49096960	1	q13.13	41.33	protein_coding	3800
6e-07	9.35e-05	15.95	21.05	79.63	20.58	8173869	(1, 3), (2, 3), (4, 3)	POF1B	ENSG00000124429	POF1B actin binding protein [Source:HGNC Symbol;Acc:HGNC:13711]	chrX	85277396	85379717	-1	q21.1	35.73	protein_coding	4003
0.0072126	0.0677	580.12	502.73	309.37	480.76	8166826	(3, 1), (3, 2), (3, 4)	USP9X	ENSG00000124486	ubiquitin specific peptidase 9 X-linked [Source:HGNC Symbol;Acc:HGNC:12632]	chrX	41085445	41236579	1	p11.4	38.54	protein_coding	14152
0.0012411	0.0231	246.12	240.49	414.83	256.22	8123621	(1, 3), (2, 3), (4, 3)	SERPINB6	ENSG00000124570	serpin family B member 6 [Source:HGNC Symbol;Acc:HGNC:8950]	chr6	2948159	2972165	-1	p25.2	47.23	protein_coding	13201
0.0025226	0.0359	87.85	127.09	88.24	158.24	8124380	(1, 4), (3, 4)	H1-1	ENSG00000124610	H1.1 linker histone, cluster member [Source:HGNC Symbol;Acc:HGNC:4715]	chr6	26017032	26017787	-1	p22.2	51.72	protein_coding	756
0.0013268	0.0238	132.34	91.9	74.09	83.76	8123819	(3, 1), (4, 1)	EEF1E1	ENSG00000124802	eukaryotic translation elongation factor 1 epsilon 1 [Source:HGNC Symbol;Acc:HGNC:3212]	chr6	8073360	8102559	-1	p24.3	39.63	protein_coding	2088
0.0013984	0.0247	883.47	986.27	861.9	1357.61	7948667	(1, 4), (3, 4)	AHNAK	ENSG00000124942	AHNAK nucleoprotein [Source:HGNC Symbol;Acc:HGNC:347]	chr11	62433542	62556235	-1	q12.3	50.05	protein_coding	19466
0.0058923	0.0607	511.35	822.95	139.66	920.77	8033257	(3, 2), (3, 4)	C3	ENSG00000125730	complement C3 [Source:HGNC Symbol;Acc:HGNC:1318]	chr19	6677704	6730562	-1	p13.3	51.26	protein_coding	8296
0.0016589	0.0277	196.82	283.01	126.03	213.16	8060736	(3, 2), (3, 4)	PANK2	ENSG00000125779	pantothenate kinase 2 [Source:HGNC Symbol;Acc:HGNC:15894]	chr20	3888839	3929887	1	p13	45.01	protein_coding	9125
0.0071882	0.0677	126.02	84.99	54.94	63.95	8065071	(3, 1), (4, 1)	FLRT3	ENSG00000125848	fibronectin leucine rich transmembrane protein 3 [Source:HGNC Symbol;Acc:HGNC:3762]	chr20	14322985	14337614	-1	p12.1	35.11	protein_coding	5191
0.002264	0.0338	186.11	201.6	120.98	224.8	8065607	(3, 2), (3, 4)	PLAGL2	ENSG00000126003	PLAG1 like zinc finger 2 [Source:HGNC Symbol;Acc:HGNC:9047]	chr20	32192504	32207743	-1	q11.21	48.45	protein_coding	5656
0.005206	0.0565	93.84	172.54	118.32	163.43	8174576	(1, 2), (1, 4)	AMOT	ENSG00000126016	angiomotin [Source:HGNC Symbol;Acc:HGNC:17810]	chrX	112774503	112840831	-1	q23	41.97	protein_coding	8518
0.0063824	0.0633	282.19	196.87	138.12	221.47	8158771	(3, 1), (3, 4)	AIF1L	ENSG00000126878	allograft inflammatory factor 1 like [Source:HGNC Symbol;Acc:HGNC:28904]	chr9	131096476	131123152	1	q34.12	53.82	protein_coding	5299
< 1e-07	< 1e-07	50.81	57.75	412.62	28.82	7964927	(1, 3), (2, 3), (4, 2), (4, 3)	TSPAN8	ENSG00000127324	tetraspanin 8 [Source:HGNC Symbol;Acc:HGNC:11855]	chr12	71125085	71441898	-1	q21.1	37.02	protein_coding	2419
0.002447	0.0355	92.78	196.84	90.75	121.42	7968015	(1, 2), (3, 2), (4, 2)	TNFRSF19	ENSG00000127863	TNF receptor superfamily member 19 [Source:HGNC Symbol;Acc:HGNC:11915]	chr13	23570370	23676104	1	q12.12	40.19	protein_coding	5113
0.0006801	0.0154	124.3	77.82	95.4	58.45	8133860	(4, 1)	GNAI1	ENSG00000127955	G protein subunit alpha i1 [Source:HGNC Symbol;Acc:HGNC:4384]	chr7	79768028	80226181	1	q21.11	35.95	protein_coding	24192
0.0078133	0.0707	325.8	245.13	337.33	238.83	8075857	(4, 3)	TST	ENSG00000128311	thiosulfate sulfurtransferase [Source:HGNC Symbol;Acc:HGNC:12388]	chr22	37010859	37020183	-1	q12.3	57.04	protein_coding	1877
0.0001048	0.0043	199.8	323.05	191.41	478.37	8142981	(1, 4), (3, 4)	PODXL	ENSG00000128567	podocalyxin like [Source:HGNC Symbol;Acc:HGNC:9171]	chr7	131500262	131558217	-1	q32.3	50.47	protein_coding	6893
0.0001891	0.00657	92.05	98.06	172.21	96.45	7989968	(1, 3), (2, 3), (4, 3)	CALML4	ENSG00000129007	calmodulin like 4 [Source:HGNC Symbol;Acc:HGNC:18445]	chr15	68190705	68206079	-1	q23	50.67	protein_coding	5007
0.0082895	0.0735	586.29	557.26	422.89	773.39	8025672	(3, 4)	SLC44A2	ENSG00000129353	solute carrier family 44 member 2 [Source:HGNC Symbol;Acc:HGNC:17292]	chr19	10602457	10644557	1	p13.2	51.73	protein_coding	4952
0.0021088	0.032	109.27	90.76	126.29	75.55	8149500	(4, 1), (4, 3)	MTUS1	ENSG00000129422	microtubule associated scaffold protein 1 [Source:HGNC Symbol;Acc:HGNC:29789]	chr8	17643795	17800917	-1	p22	40.89	protein_coding	12010
0.0001238	0.00482	154.61	187.06	183.48	259.44	8038725	(1, 4), (2, 4)	KLK10	ENSG00000129451	kallikrein related peptidase 10 [Source:HGNC Symbol;Acc:HGNC:6358]	chr19	51012739	51020175	-1	q13.41	56.29	protein_coding	3798
0.0066535	0.0648	134.71	159.61	123.81	186.77	8038707	(3, 4)	KLK8	ENSG00000129455	kallikrein related peptidase 8 [Source:HGNC Symbol;Acc:HGNC:6369]	chr19	50996007	51002711	-1	q13.41	53.21	protein_coding	1865
0.0017669	0.0287	312.92	241.07	165.52	276.44	7978570	(3, 1), (3, 4)	SNX6	ENSG00000129515	sorting nexin 6 [Source:HGNC Symbol;Acc:HGNC:14970]	chr14	34561093	34630160	-1	q13.1	44.32	protein_coding	4083
0.0011647	0.0222	273.37	132.7	174.11	147.53	7978544	(2, 1), (4, 1)	EGLN3	ENSG00000129521	egl-9 family hypoxia inducible factor 3 [Source:HGNC Symbol;Acc:HGNC:14661]	chr14	33924227	34462774	-1	q13.1	41.68	protein_coding	7363
2e-07	4.2e-05	347.22	86.61	88.69	89.02	8062461	(2, 1), (3, 1), (4, 1)	LBP	ENSG00000129988	lipopolysaccharide binding protein [Source:HGNC Symbol;Acc:HGNC:6517]	chr20	38346482	38377013	1	q11.23	47.03	protein_coding	1825
0.0020701	0.0316	133.66	138.09	151.75	199.69	8156274	(1, 4), (2, 4)	NXNL2	ENSG00000130045	nucleoredoxin like 2 [Source:HGNC Symbol;Acc:HGNC:30482]	chr9	88534033	88584274	1	q22.1	47.83	protein_coding	2498
4.2e-06	0.000441	64.28	45.63	89.66	41.73	8171449	(4, 1), (2, 3), (4, 3)	ACE2	ENSG00000130234	angiotensin I converting enzyme 2 [Source:HGNC Symbol;Acc:HGNC:13557]	chrX	15494566	15607236	-1	p22.2	38.66	protein_coding	9739
0.0016054	0.0272	124.17	146.88	97.37	292.5	8035304	(3, 4)	BST2	ENSG00000130303	bone marrow stromal cell antigen 2 [Source:HGNC Symbol;Acc:HGNC:1119]	chr19	17402939	17405630	-1	p13.11	58.4	protein_coding	1101
0.0006136	0.0143	364.32	228.79	294.65	231.13	8122986	(2, 1), (4, 1)	SNX9	ENSG00000130340	sorting nexin 9 [Source:HGNC Symbol;Acc:HGNC:14973]	chr6	157700387	157945077	1	q25.3	42.45	protein_coding	15256
0.0001796	0.00637	268.23	176.65	194.72	337	8050007	(2, 4), (3, 4)	PXDN	ENSG00000130508	peroxidasin [Source:HGNC Symbol;Acc:HGNC:14966]	chr2	1631887	1744852	-1	p25.3	49.9	protein_coding	11266
0.0001102	0.00435	261.31	153.02	211.51	133.96	8027002	(2, 1), (4, 1), (4, 3)	GDF15	ENSG00000130513	growth differentiation factor 15 [Source:HGNC Symbol;Acc:HGNC:30142]	chr19	18374731	18389176	1	p13.11	51.93	protein_coding	2087
0.0019985	0.0308	350.43	269.65	186.66	232.08	8073799	(3, 1), (4, 1)	ATXN10	ENSG00000130638	ataxin 10 [Source:HGNC Symbol;Acc:HGNC:10549]	chr22	45671798	45845307	1	q13.31	40.57	protein_coding	5127
0.0053433	0.0573	531.94	376.93	268.96	464.23	8067409	(3, 1), (3, 4)	LAMA5	ENSG00000130702	laminin subunit alpha 5 [Source:HGNC Symbol;Acc:HGNC:6485]	chr20	62307955	62367312	-1	q13.33	61.89	protein_coding	14291
1.9e-06	0.000244	778.79	528.09	459.75	1218.53	8158671	(2, 4), (3, 4)	ASS1	ENSG00000130707	argininosuccinate synthase 1 [Source:HGNC Symbol;Acc:HGNC:758]	chr9	130444961	130501274	1	q34.11	55.65	protein_coding	3018
0.0045028	0.0514	141.34	85.85	78.77	87.92	8166705	(2, 1), (3, 1), (4, 1)	PRRG1	ENSG00000130962	proline rich and Gla domain 1 [Source:HGNC Symbol;Acc:HGNC:9469]	chrX	37349309	37457292	1	p21.1	37.91	protein_coding	6143
0.0012756	0.0234	989.36	671.1	512.34	892.45	8167069	(3, 1), (3, 4)	UBA1	ENSG00000130985	ubiquitin like modifier activating enzyme 1 [Source:HGNC Symbol;Acc:HGNC:12469]	chrX	47190861	47215128	1	p11.3	51.31	protein_coding	6437
0.0009378	0.0195	134.5	122.33	130.18	171.77	8031414	(2, 4)	EPS8L1	ENSG00000131037	EPS8 like 1 [Source:HGNC Symbol;Acc:HGNC:21295]	chr19	55072020	55087923	1	q13.42	58.26	protein_coding	5341
0.0048109	0.0538	408.6	395.07	218.44	459.24	7915286	(3, 4)	PPT1	ENSG00000131238	palmitoyl-protein thioesterase 1 [Source:HGNC Symbol;Acc:HGNC:9325]	chr1	40072710	40097260	-1	p34.2	43.84	protein_coding	3372
0.0011407	0.0221	474.26	360.19	206.99	370.91	8108435	(3, 1), (3, 2), (3, 4)	UBE2D2	ENSG00000131508	ubiquitin conjugating enzyme E2 D2 [Source:HGNC Symbol;Acc:HGNC:12475]	chr5	139526431	139628434	1	q31.2	44.35	protein_coding	3556
0.000653	0.015	162.94	150.25	314.61	141.34	8015016	(1, 3), (2, 3), (4, 3)	TNS4	ENSG00000131746	tensin 4 [Source:HGNC Symbol;Acc:HGNC:24352]	chr17	40475828	40501623	-1	q21.2	52.87	protein_coding	4873
1.38e-05	0.000959	166.76	179.23	552.11	172.09	8006865	(1, 3), (2, 3), (4, 3)	PPP1R1B	ENSG00000131771	protein phosphatase 1 regulatory inhibitor subunit 1B [Source:HGNC Symbol;Acc:HGNC:9287]	chr17	39626740	39636626	1	q12	57.94	protein_coding	4543
0.0012599	0.0233	279.7	153.23	218.73	164.43	7974461	(2, 1), (4, 1)	LGALS3	ENSG00000131981	galectin 3 [Source:HGNC Symbol;Acc:HGNC:6563]	chr14	55124110	55145423	1	q22.3	44.62	protein_coding	2199
3.49e-05	0.00193	517.58	213.11	176.53	304.13	7915827	(2, 1), (3, 1), (4, 1), (3, 4)	LRRC41	ENSG00000132128	leucine rich repeat containing 41 [Source:HGNC Symbol;Acc:HGNC:16917]	chr1	46261196	46303616	-1	p33	47.42	protein_coding	8614
< 1e-07	< 1e-07	75.9	46.58	98.41	35.69	8077899	(2, 1), (4, 1), (2, 3), (4, 3)	PPARG	ENSG00000132170	peroxisome proliferator activated receptor gamma [Source:HGNC Symbol;Acc:HGNC:9236]	chr3	12287368	12434356	1	p25.2	38.71	protein_coding	11981
0.0009631	0.0198	272.25	175.24	295.86	156.8	8021966	(4, 1), (4, 3)	ENOSF1	ENSG00000132199	enolase superfamily member 1 [Source:HGNC Symbol;Acc:HGNC:30365]	chr18	670318	712662	-1	p11.32	46.09	protein_coding	11390
0.0006999	0.0157	815.58	467.54	299.48	497.12	8148333	(2, 1), (3, 1), (4, 1)	EFR3A	ENSG00000132294	EFR3 homolog A [Source:HGNC Symbol;Acc:HGNC:28970]	chr8	131904093	132013642	1	q24.22	35.32	protein_coding	6192
2.19e-05	0.00137	52.02	62.59	46.79	92.47	8059878	(1, 4), (2, 4), (3, 4)	IQCA1	ENSG00000132321	IQ motif containing with AAA domain 1 [Source:HGNC Symbol;Acc:HGNC:26195]	chr2	236324147	236507535	-1	q37.3	42.77	protein_coding	5968
0.0038603	0.0468	276.22	172.66	171.43	212.9	8011293	(2, 1), (3, 1)	CLUH	ENSG00000132361	clustered mitochondria homolog [Source:HGNC Symbol;Acc:HGNC:29094]	chr17	2689386	2712663	-1	p13.3	62.54	protein_coding	6900
0.0021646	0.0327	370.55	292.5	173.04	238.09	8011626	(3, 1), (4, 1), (3, 2)	UBE2G1	ENSG00000132388	ubiquitin conjugating enzyme E2 G1 [Source:HGNC Symbol;Acc:HGNC:12482]	chr17	4269259	4366675	-1	p13.2	41.79	protein_coding	4586
0.000924	0.0193	85.55	146.37	90.64	164.11	7906061	(1, 4), (3, 4)	SYT11	ENSG00000132718	synaptotagmin 11 [Source:HGNC Symbol;Acc:HGNC:19239]	chr1	155859567	155885199	1	q22	46.48	protein_coding	5182
0.0001004	0.0042	256.75	248.12	122.7	597.16	7923547	(2, 4), (3, 4)	CHI3L1	ENSG00000133048	chitinase 3 like 1 [Source:HGNC Symbol;Acc:HGNC:1932]	chr1	203178931	203186704	-1	q32.1	54.8	protein_coding	3363
0.0063751	0.0633	66.06	138.12	74.94	120.73	7968637	(1, 2), (1, 4)	CCNA1	ENSG00000133101	cyclin A1 [Source:HGNC Symbol;Acc:HGNC:1577]	chr13	36431520	36442870	1	q13.3	42.94	protein_coding	2251
0.0026227	0.0368	513.89	288.83	289.17	295.97	8021727	(2, 1), (3, 1), (4, 1)	CNDP2	ENSG00000133313	carnosine dipeptidase 2 [Source:HGNC Symbol;Acc:HGNC:24437]	chr18	74495816	74523454	1	q22.3	51.18	protein_coding	11822
0.0060495	0.0616	534.12	523.11	430.31	370.44	7965423	(4, 1), (4, 2)	BTG1	ENSG00000133639	BTG anti-proliferation factor 1 [Source:HGNC Symbol;Acc:HGNC:1130]	chr12	92140278	92145846	-1	q21.33	42.38	protein_coding	4855
7.9e-06	0.000671	65.72	103.53	73.26	184.41	7962058	(1, 4), (2, 4), (3, 4)	TMTC1	ENSG00000133687	transmembrane O-mannosyltransferase targeting cadherins 1 [Source:HGNC Symbol;Acc:HGNC:24099]	chr12	29500840	29784759	-1	p11.22	39.27	protein_coding	14681
0.0004809	0.0123	113.24	115.36	50.86	105.95	8147101	(3, 1), (3, 2), (3, 4)	E2F5	ENSG00000133740	E2F transcription factor 5 [Source:HGNC Symbol;Acc:HGNC:3119]	chr8	85177154	85217158	1	q21.2	39.54	protein_coding	5999
0.0043646	0.0504	73.33	96.6	46.07	79.44	7965200	(3, 2), (3, 4)	CCDC59	ENSG00000133773	coiled-coil domain containing 59 [Source:HGNC Symbol;Acc:HGNC:25005]	chr12	82223681	82358805	-1	q21.31	35.35	protein_coding	3518
0.000278	0.00848	319.09	216.57	232.05	203.55	7980005	(2, 1), (4, 1)	NUMB	ENSG00000133961	NUMB endocytic adaptor protein [Source:HGNC Symbol;Acc:HGNC:8060]	chr14	73275107	73458617	-1	q24.3	40.48	protein_coding	9546
0.0002633	0.00823	708.36	290.75	243.6	340.82	8077441	(2, 1), (3, 1), (4, 1)	BHLHE40	ENSG00000134107	basic helix-loop-helix family member e40 [Source:HGNC Symbol;Acc:HGNC:1046]	chr3	4979437	4985323	1	p26.1	47.72	protein_coding	3516
0.002007	0.0308	206.58	123.54	117.03	141.14	8077458	(2, 1), (3, 1), (4, 1)	EDEM1	ENSG00000134109	ER degradation enhancing alpha-mannosidase like protein 1 [Source:HGNC Symbol;Acc:HGNC:18967]	chr3	5187646	5219958	1	p26.1	43.38	protein_coding	6737
6.67e-05	0.00303	140.06	73.34	88.85	64.2	7918379	(2, 1), (4, 1)	GSTM3	ENSG00000134202	glutathione S-transferase mu 3 [Source:HGNC Symbol;Acc:HGNC:4635]	chr1	109733932	109741038	-1	p13.3	47.16	protein_coding	4750
0.002965	0.0397	75.43	63.15	47.14	43.36	7918157	(4, 1)	VAV3	ENSG00000134215	vav guanine nucleotide exchange factor 3 [Source:HGNC Symbol;Acc:HGNC:12659]	chr1	107571161	107965180	-1	p13.3	37.54	protein_coding	7306
0.0069282	0.0661	59.45	64.35	127.32	58.93	7919055	(1, 3), (2, 3), (4, 3)	HMGCS2	ENSG00000134240	3-hydroxy-3-methylglutaryl-CoA synthase 2 [Source:HGNC Symbol;Acc:HGNC:5008]	chr1	119748002	119768905	-1	p12	41.87	protein_coding	2565
4.2e-06	0.000441	314.37	494.85	357.39	698.93	7918323	(1, 4), (3, 4)	SORT1	ENSG00000134243	sortilin 1 [Source:HGNC Symbol;Acc:HGNC:11186]	chr1	109309568	109397918	-1	p13.3	42.26	protein_coding	9127
0.0053014	0.0571	500.5	187	105.42	295.01	7918936	(3, 1)	VTCN1	ENSG00000134258	V-set domain containing T cell activation inhibitor 1 [Source:HGNC Symbol;Acc:HGNC:28873]	chr1	117143587	117210960	-1	p12	42.41	protein_coding	3027
0.0036334	0.0451	75.87	85.67	61.66	141.56	8040080	(3, 4)	RSAD2	ENSG00000134321	radical S-adenosyl methionine domain containing 2 [Source:HGNC Symbol;Acc:HGNC:30908]	chr2	6865557	6898239	1	p25.2	40.27	protein_coding	5659
2.63e-05	0.00152	119.54	252.42	242.57	129.93	7947744	(1, 2), (1, 3), (4, 2), (4, 3)	LRP4	ENSG00000134569	LDL receptor related protein 4 [Source:HGNC Symbol;Acc:HGNC:6696]	chr11	46856717	46918642	-1	p11.2	48.69	protein_coding	8748
0.0031721	0.0412	51.26	52.49	90.17	51.66	7943240	(1, 3), (2, 3), (4, 3)	PIWIL4	ENSG00000134627	piwi like RNA-mediated gene silencing 4 [Source:HGNC Symbol;Acc:HGNC:18444]	chr11	94543840	94621421	1	q21	40.25	protein_coding	4498
0.0040997	0.0486	337.7	329.8	230.1	404.15	7915015	(3, 4)	GNL2	ENSG00000134697	G protein nucleolar 2 [Source:HGNC Symbol;Acc:HGNC:29925]	chr1	37566816	37595937	-1	p34.3	42.78	protein_coding	5747
0.000999	0.0204	168.92	133.72	62.88	108.15	7901765	(3, 1), (3, 2)	HOOK1	ENSG00000134709	hook microtubule tethering protein 1 [Source:HGNC Symbol;Acc:HGNC:19884]	chr1	59814786	59876322	1	p32.1	34.38	protein_coding	6614
0.0068674	0.0657	213.61	209.49	118.16	180.25	7916185	(3, 1), (3, 2), (3, 4)	TUT4	ENSG00000134744	terminal uridylyl transferase 4 [Source:HGNC Symbol;Acc:HGNC:28981]	chr1	52408282	52553487	-1	p32.3	38.59	protein_coding	16199
0.0001782	0.00634	533.99	275.1	268.75	282.34	7970033	(2, 1), (3, 1), (4, 1)	COL4A2	ENSG00000134871	collagen type IV alpha 2 chain [Source:HGNC Symbol;Acc:HGNC:2203]	chr13	110305812	110513209	1	q34	47.83	protein_coding	19271
0.0078473	0.071	581.01	402.71	240.79	409.17	8156228	(3, 1)	CTSL	ENSG00000135047	cathepsin L [Source:HGNC Symbol;Acc:HGNC:2537]	chr9	87724051	87731469	1	q21.33	45.11	protein_coding	6113
3e-07	5.51e-05	609.76	478.26	1071.69	379.93	8162117	(1, 3), (4, 1), (2, 3), (4, 3)	GOLM1	ENSG00000135052	golgi membrane protein 1 [Source:HGNC Symbol;Acc:HGNC:15451]	chr9	86026146	86100173	-1	q21.33	45.43	protein_coding	4233
5.17e-05	0.00254	522.53	248.77	90.18	325.38	8156043	(3, 1), (3, 2), (3, 4)	PSAT1	ENSG00000135069	phosphoserine aminotransferase 1 [Source:HGNC Symbol;Acc:HGNC:19129]	chr9	78297125	78330093	1	q21.2	45.6	protein_coding	2206
0.000539	0.013	230.47	145.31	187.81	126.63	7966851	(2, 1), (4, 1)	TAOK3	ENSG00000135090	TAO kinase 3 [Source:HGNC Symbol;Acc:HGNC:18133]	chr12	118149801	118372907	-1	q24.23	39.71	protein_coding	10532
2.46e-05	0.00148	316.73	301.71	227.12	508.31	7966760	(1, 4), (2, 4), (3, 4)	FBXO21	ENSG00000135108	F-box protein 21 [Source:HGNC Symbol;Acc:HGNC:13592]	chr12	117141991	117190471	-1	q24.22	44.32	protein_coding	6886
0.0065268	0.0643	154.03	124.5	110.5	107.37	7959267	(4, 1)	P2RX4	ENSG00000135124	purinergic receptor P2X 4 [Source:HGNC Symbol;Acc:HGNC:8535]	chr12	121209861	121234106	1	q24.31	50.39	protein_coding	8155
0.0042623	0.0496	65.19	65.95	216.6	73.86	8120967	(1, 3), (2, 3), (4, 3)	NT5E	ENSG00000135318	5'-nucleotidase ecto [Source:HGNC Symbol;Acc:HGNC:8021]	chr6	85449584	85495791	1	q14.3	43.07	protein_coding	4533
0.000254	0.00806	959.33	330.37	280.75	668.43	7955613	(2, 1), (3, 1), (2, 4), (3, 4)	KRT7	ENSG00000135480	keratin 7 [Source:HGNC Symbol;Acc:HGNC:6445]	chr12	52232520	52252186	1	q13.13	54.34	protein_coding	3999
0.0002074	0.00701	66.22	122.08	127.35	175.55	8121850	(1, 4)	HEY2	ENSG00000135547	hes related family bHLH transcription factor with YRPW motif 2 [Source:HGNC Symbol;Acc:HGNC:4881]	chr6	125747664	125761269	1	q22.31	43.64	protein_coding	2689
0.0056101	0.0594	85.93	154.97	84.44	93.98	7957126	(1, 2), (4, 2)	KCNMB4	ENSG00000135643	potassium calcium-activated channel subfamily M regulatory beta subunit 4 [Source:HGNC Symbol;Acc:HGNC:6289]	chr12	70366290	70434292	1	q15	39.68	protein_coding	4860
0.0003163	0.00908	945.25	451.67	338.82	412.44	7964701	(2, 1), (3, 1), (4, 1)	GNS	ENSG00000135677	glucosamine (N-acetyl)-6-sulfatase [Source:HGNC Symbol;Acc:HGNC:4422]	chr12	64713445	64759431	-1	q14.3	42.19	protein_coding	6268
0.0066256	0.0647	194.07	97.74	113.51	90.52	7964834	(2, 1), (4, 1)	CPM	ENSG00000135678	carboxypeptidase M [Source:HGNC Symbol;Acc:HGNC:2311]	chr12	68842197	68971570	-1	q15	41.46	protein_coding	7535
8.7e-06	0.000716	631.83	374.85	266.93	265.84	7956989	(2, 1), (3, 1), (4, 1)	MDM2	ENSG00000135679	MDM2 proto-oncogene [Source:HGNC Symbol;Acc:HGNC:6973]	chr12	68808177	68845544	1	q15	39.04	protein_coding	8306
4.07e-05	0.00213	1379.02	629.97	343.54	549.82	7908041	(2, 1), (3, 1), (4, 1)	LAMC1	ENSG00000135862	laminin subunit gamma 1 [Source:HGNC Symbol;Acc:HGNC:6492]	chr1	183023420	183145592	1	q25.3	40.09	protein_coding	8446
0.0016828	0.0279	143.41	91.77	70.19	81.07	7958019	(3, 1), (4, 1)	DRAM1	ENSG00000136048	DNA damage regulated autophagy modulator 1 [Source:HGNC Symbol;Acc:HGNC:25645]	chr12	101877580	102012130	1	q23.2	41.4	protein_coding	3940
0.0040841	0.0485	719.22	390.33	565.39	485.05	8080714	(2, 1), (4, 1)	FLNB	ENSG00000136068	filamin B [Source:HGNC Symbol;Acc:HGNC:3755]	chr3	58008398	58172251	1	p14.3	46.61	protein_coding	29144
1.04e-05	0.000822	150.67	123.57	194.3	104.25	7972021	(4, 1), (2, 3), (4, 3)	TBC1D4	ENSG00000136111	TBC1 domain family member 4 [Source:HGNC Symbol;Acc:HGNC:19165]	chr13	75283503	75482169	-1	q22.2	38.11	protein_coding	8032
0.0085088	0.0747	97.26	104.59	153.25	82.46	7968976	(4, 3)	LRCH1	ENSG00000136141	leucine rich repeats and calponin homology domain containing 1 [Source:HGNC Symbol;Acc:HGNC:20309]	chr13	46553168	46753040	1	q14.13	40.02	protein_coding	8610
0.0006602	0.0151	1413.28	1000.75	648.56	827.73	7969003	(3, 1), (4, 1)	ITM2B	ENSG00000136156	integral membrane protein 2B [Source:HGNC Symbol;Acc:HGNC:6174]	chr13	48232612	48270357	1	q14.2	37.65	protein_coding	10661
0.0047234	0.0532	429.84	370.17	251.2	491.06	8138824	(3, 4)	SCRN1	ENSG00000136193	secernin 1 [Source:HGNC Symbol;Acc:HGNC:22192]	chr7	29920104	29990289	-1	p14.3	43.91	protein_coding	6048
0.0018411	0.0294	219.42	164.38	205.02	137.46	8008113	(4, 1)	CALCOCO2	ENSG00000136436	calcium binding and coiled-coil domain 2 [Source:HGNC Symbol;Acc:HGNC:29912]	chr17	48831018	48866522	1	q21.32	43.96	protein_coding	8303
3.93e-05	0.00209	49.89	55.18	136.96	58.3	8045835	(1, 3), (2, 3), (4, 3)	GALNT5	ENSG00000136542	polypeptide N-acetylgalactosaminyltransferase 5 [Source:HGNC Symbol;Acc:HGNC:4127]	chr2	157257705	157318491	1	q24.1	39.11	protein_coding	10991
0.0032252	0.0415	323.03	230.8	124.31	249.13	8083876	(3, 1), (3, 4)	SKIL	ENSG00000136603	SKI like proto-oncogene [Source:HGNC Symbol;Acc:HGNC:10897]	chr3	170357678	170396835	1	q26.2	39.63	protein_coding	7782
0.0073253	0.0683	238.29	164.01	105.6	210.7	7898677	(3, 1), (3, 4)	HS6ST1	ENSG00000136720	heparan sulfate 6-O-sulfotransferase 1 [Source:HGNC Symbol;Acc:HGNC:5201]	chr2	128236716	128318868	-1	q14.3	53.2	protein_coding	4974
7.48e-05	0.00331	237.53	200.93	163.36	415.39	8156706	(2, 4), (3, 4)	TMOD1	ENSG00000136842	tropomodulin 1 [Source:HGNC Symbol;Acc:HGNC:11871]	chr9	97501180	97601743	1	q22.33	46.76	protein_coding	3676
0.0001317	0.00503	169.27	119.68	190.93	116.19	8163548	(4, 1), (2, 3), (4, 3)	KIF12	ENSG00000136883	kinesin family member 12 [Source:HGNC Symbol;Acc:HGNC:21495]	chr9	114086126	114099292	-1	q32	55.29	protein_coding	3037
0.0003029	0.0089	160.98	181.34	104.73	205.43	8162850	(3, 2), (3, 4)	TEX10	ENSG00000136891	testis expressed 10 [Source:HGNC Symbol;Acc:HGNC:25988]	chr9	100302077	100352942	-1	q31.1	37.95	protein_coding	7264
0.0004537	0.0117	558.37	339.31	214.56	425.31	8152628	(3, 1), (3, 4)	DERL1	ENSG00000136986	derlin 1 [Source:HGNC Symbol;Acc:HGNC:28454]	chr8	123013170	123042302	-1	q24.13	41.15	protein_coding	6954
0.0009191	0.0192	83.73	133.85	123.56	169.05	8117034	(1, 4)	GMPR	ENSG00000137198	guanosine monophosphate reductase [Source:HGNC Symbol;Acc:HGNC:4376]	chr6	16238587	16295549	1	p22.3	47.82	protein_coding	2225
0.0029394	0.0394	137.84	209.37	114.88	180.97	7950544	(3, 2), (3, 4)	THAP12	ENSG00000137492	THAP domain containing 12 [Source:HGNC Symbol;Acc:HGNC:9440]	chr11	76349898	76381132	-1	q13.5	40.28	protein_coding	8802
6.85e-05	0.0031	58.26	59.83	156.62	52.04	7950810	(1, 3), (2, 3), (4, 3)	SYTL2	ENSG00000137501	synaptotagmin like 2 [Source:HGNC Symbol;Acc:HGNC:15585]	chr11	85694224	85811159	-1	q14.1	40.22	protein_coding	11258
0.0016111	0.0272	219.14	213.42	85.97	180.62	7950731	(3, 1), (3, 2), (3, 4)	PRCP	ENSG00000137509	prolylcarboxypeptidase [Source:HGNC Symbol;Acc:HGNC:9344]	chr11	82822936	82970584	-1	q14.1	39.33	protein_coding	23408
0.0082905	0.0735	146.99	115.25	79.03	253.71	8146863	(3, 4)	SULF1	ENSG00000137573	sulfatase 1 [Source:HGNC Symbol;Acc:HGNC:20391]	chr8	69466624	69660915	1	q13.2	40.34	protein_coding	9372
0.0083389	0.0737	697.73	425.65	265.56	397.1	8146550	(3, 1), (4, 1)	SDCBP	ENSG00000137575	syndecan binding protein [Source:HGNC Symbol;Acc:HGNC:10662]	chr8	58552924	58582859	1	q12.1	35.86	protein_coding	4777
0.0036875	0.0456	196.2	171.04	90.39	195.64	7951554	(3, 1), (3, 2), (3, 4)	RDX	ENSG00000137710	radixin [Source:HGNC Symbol;Acc:HGNC:9944]	chr11	109864295	110296712	-1	q22.3	39.02	protein_coding	8518
0.0055006	0.0587	31.07	51.82	49.78	36.32	7917199	(1, 2), (4, 2)	TTLL7	ENSG00000137941	tubulin tyrosine ligase like 7 [Source:HGNC Symbol;Acc:HGNC:26242]	chr1	83865024	83999150	-1	p31.1	35.53	protein_coding	10547
6.2e-06	0.000573	58.07	72.01	133.33	56.85	7902518	(1, 3), (2, 3), (4, 3)	GIPC2	ENSG00000137960	GIPC PDZ domain containing family member 2 [Source:HGNC Symbol;Acc:HGNC:18177]	chr1	77979542	78138444	1	p31.1	38.79	protein_coding	3904
1.53e-05	0.00101	249.32	116.59	84.11	244.39	7917850	(2, 1), (3, 1), (2, 4), (3, 4)	ARHGAP29	ENSG00000137962	Rho GTPase activating protein 29 [Source:HGNC Symbol;Acc:HGNC:30207]	chr1	94148988	94275068	-1	p22.1	38.07	protein_coding	18370
0.0019436	0.0302	201.36	74.23	61.26	94.99	8051583	(2, 1), (3, 1), (4, 1)	CYP1B1	ENSG00000138061	cytochrome P450 family 1 subfamily B member 1 [Source:HGNC Symbol;Acc:HGNC:2597]	chr2	38066973	38109902	-1	p22.2	44.41	protein_coding	5985
0.000965	0.0198	50.46	33.77	61.51	33.01	8041727	(4, 1), (2, 3), (4, 3)	SLC3A1	ENSG00000138079	solute carrier family 3 member 1 [Source:HGNC Symbol;Acc:HGNC:11025]	chr2	44275458	44321494	1	p21	41.62	protein_coding	6541
0.0017034	0.028	865.86	376.01	342.9	558.57	7935058	(2, 1), (3, 1)	MYOF	ENSG00000138119	myoferlin [Source:HGNC Symbol;Acc:HGNC:3656]	chr10	93306429	93482334	-1	q23.33	44.36	protein_coding	8490
0.0057337	0.0598	338.84	260.94	181.22	297.43	8082688	(3, 1), (3, 4)	DNAJC13	ENSG00000138246	DnaJ heat shock protein family (Hsp40) member C13 [Source:HGNC Symbol;Acc:HGNC:30343]	chr3	132417502	132539032	1	q22.1	36.8	protein_coding	9630
0.0016213	0.0274	71.74	69.92	65.17	106.28	8047086	(2, 4), (3, 4)	NAB1	ENSG00000138386	NGFI-A binding protein 1 [Source:HGNC Symbol;Acc:HGNC:7626]	chr2	190646746	190692766	1	q32.2	37.7	protein_coding	4887
0.0017955	0.029	552.93	357.55	227.1	473.47	8046861	(3, 1), (3, 4)	ITGAV	ENSG00000138448	integrin subunit alpha V [Source:HGNC Symbol;Acc:HGNC:6150]	chr2	186590056	186680901	1	q32.1	35.78	protein_coding	8220
0.001693	0.0279	200.3	138.7	103.38	142.38	8082120	(3, 1), (4, 1)	SLC49A4	ENSG00000138463	solute carrier family 49 member 4 [Source:HGNC Symbol;Acc:HGNC:16628]	chr3	122795069	122881139	1	q21.1	38.04	protein_coding	3322
0.0052722	0.0568	173.19	163.1	88.62	224.29	8090018	(3, 4)	PARP9	ENSG00000138496	poly(ADP-ribose) polymerase family member 9 [Source:HGNC Symbol;Acc:HGNC:24118]	chr3	122527924	122564577	-1	q21.1	42.46	protein_coding	8938
0.0089036	0.0767	185.17	128	150.18	125.91	8096385	(2, 1), (4, 1)	HERC3	ENSG00000138641	HECT and RLD domain containing E3 ubiquitin protein ligase 3 [Source:HGNC Symbol;Acc:HGNC:4876]	chr4	88592434	88708541	1	q22.1	39.04	protein_coding	6969
0.0055296	0.0588	85.63	108.83	60.57	107.4	8101304	(3, 2), (3, 4)	RASGEF1B	ENSG00000138670	RasGEF domain family member 1B [Source:HGNC Symbol;Acc:HGNC:24881]	chr4	81426393	82044244	-1	q21.22	39.05	protein_coding	10183
2.25e-05	0.00139	76.48	63.28	142.52	42.22	8102532	(2, 3), (4, 3)	PDE5A	ENSG00000138735	phosphodiesterase 5A [Source:HGNC Symbol;Acc:HGNC:8784]	chr4	119494397	119628804	-1	q26	36.4	protein_coding	9586
0.0008634	0.0184	122.76	323.87	82.8	191.03	8102232	(1, 2), (3, 2)	LEF1	ENSG00000138795	lymphoid enhancer binding factor 1 [Source:HGNC Symbol;Acc:HGNC:6551]	chr4	108047545	108168956	-1	q25	40.02	protein_coding	5361
0.0057017	0.0598	466.81	439.84	301.37	357.48	8096781	(3, 1), (3, 2)	SEC24B	ENSG00000138802	SEC24 homolog B, COPII coat complex component [Source:HGNC Symbol;Acc:HGNC:10704]	chr4	109433772	109540896	1	q25	37.89	protein_coding	5219
0.0013432	0.0241	148.36	92.9	79.37	87.88	8072454	(2, 1), (3, 1), (4, 1)	RNF185	ENSG00000138942	ring finger protein 185 [Source:HGNC Symbol;Acc:HGNC:26783]	chr22	31160182	31207019	1	q12.2	44.97	protein_coding	3448
< 1e-07	< 1e-07	185.96	55.99	58.53	48.38	7962250	(2, 1), (3, 1), (4, 1)	CPNE8	ENSG00000139117	copine 8 [Source:HGNC Symbol;Acc:HGNC:23498]	chr12	38646822	38907430	-1	q12	36.06	protein_coding	5120
0.0014779	0.0257	290.55	429.62	193.46	404.6	8180256	(3, 2), (3, 4)	SINHCAF	ENSG00000139146	SIN3-HDAC complex associated factor [Source:HGNC Symbol;Acc:HGNC:30702]	chr12	31280584	31327058	-1	p11.21	41.46	protein_coding	5575
0.0001054	0.0043	153.44	80.34	95.2	83.73	7962579	(2, 1), (3, 1), (4, 1)	AMIGO2	ENSG00000139211	adhesion molecule with Ig like domain 2 [Source:HGNC Symbol;Acc:HGNC:24073]	chr12	47075707	47079959	-1	q13.11	44.65	protein_coding	3964
0.001326	0.0238	210.28	210.85	114.72	205.32	7957715	(3, 1), (3, 2), (3, 4)	NEDD1	ENSG00000139350	NEDD1 gamma-tubulin ring complex targeting factor [Source:HGNC Symbol;Acc:HGNC:7723]	chr12	96907224	96953780	1	q23.1	35.02	protein_coding	4465
0.0003025	0.0089	57.38	105.17	59.04	135.92	7969533	(1, 4), (3, 4)	SLAIN1	ENSG00000139737	SLAIN motif family member 1 [Source:HGNC Symbol;Acc:HGNC:26387]	chr13	77697687	77764242	1	q22.3	36.87	protein_coding	4300
0.004754	0.0534	77.27	61.99	62.55	94.65	7980537	(2, 4)	STON2	ENSG00000140022	stonin 2 [Source:HGNC Symbol;Acc:HGNC:30652]	chr14	81260656	81436465	-1	q31.1	41.03	protein_coding	7812
6.53e-05	0.00301	475.08	223.1	124.83	269.7	7981290	(2, 1), (3, 1), (4, 1), (3, 4)	WARS1	ENSG00000140105	tryptophanyl-tRNA synthetase 1 [Source:HGNC Symbol;Acc:HGNC:12729]	chr14	100333790	100376805	-1	q32.2	46.89	protein_coding	6356
< 1e-07	< 1e-07	64.69	84.38	317.33	87.35	7984001	(1, 3), (2, 3), (4, 3)	GCNT3	ENSG00000140297	glucosaminyl (N-acetyl) transferase 3, mucin type [Source:HGNC Symbol;Acc:HGNC:4205]	chr15	59594875	59640239	1	q22.2	43.27	protein_coding	6476
0.0012777	0.0234	462.71	275.45	219.24	309.8	8151254	(2, 1), (3, 1), (4, 1)	NCOA2	ENSG00000140396	nuclear receptor coactivator 2 [Source:HGNC Symbol;Acc:HGNC:7669]	chr8	70109782	70403808	-1	q13.3	38.24	protein_coding	10009
0.0053155	0.0571	314.65	225.45	433.71	229.35	7984079	(2, 3), (4, 3)	TPM1	ENSG00000140416	tropomyosin 1 [Source:HGNC Symbol;Acc:HGNC:12010]	chr15	63042632	63071915	1	q22.2	45.06	protein_coding	13765
6.58e-05	0.00302	382.07	277.57	158.62	416.69	7991234	(3, 1), (3, 4)	MFGE8	ENSG00000140545	milk fat globule EGF and factor V/VIII domain containing [Source:HGNC Symbol;Acc:HGNC:7036]	chr15	88898683	88913381	-1	q26.1	55.57	protein_coding	6807
2.14e-05	0.00135	793.58	333.83	347.7	347.86	8016739	(2, 1), (3, 1), (4, 1)	TOB1	ENSG00000141232	transducer of ERBB2, 1 [Source:HGNC Symbol;Acc:HGNC:11979]	chr17	50862223	50867978	-1	q21.33	50.17	protein_coding	2521
0.0009199	0.0192	639.75	409.39	372.86	424.58	8007976	(2, 1), (3, 1), (4, 1)	NPEPPS	ENSG00000141279	aminopeptidase puromycin sensitive [Source:HGNC Symbol;Acc:HGNC:7900]	chr17	47522942	47624665	1	q21.32	41.3	protein_coding	12881
6.62e-05	0.00302	228.69	138.38	151.51	117.55	8013965	(2, 1), (4, 1)	SSH2	ENSG00000141298	slingshot protein phosphatase 2 [Source:HGNC Symbol;Acc:HGNC:30580]	chr17	29625938	29930276	-1	q11.2	40.66	protein_coding	12696
5.46e-05	0.00265	241.1	150.88	243.49	143.48	8020183	(2, 1), (4, 1), (2, 3), (4, 3)	IMPA2	ENSG00000141401	inositol monophosphatase 2 [Source:HGNC Symbol;Acc:HGNC:6051]	chr18	11981025	12030877	1	p11.21	49.27	protein_coding	3819
0.0074425	0.0688	168.83	159.69	250.75	202.83	8020455	(2, 3)	GATA6	ENSG00000141448	GATA binding protein 6 [Source:HGNC Symbol;Acc:HGNC:4174]	chr18	22169589	22202528	1	q11.2	44.68	protein_coding	3799
0.0040638	0.0484	296.93	208.52	177.73	253.54	8019046	(3, 1), (3, 4)	EIF4A3	ENSG00000141543	eukaryotic translation initiation factor 4A3 [Source:HGNC Symbol;Acc:HGNC:18683]	chr17	80134369	80147151	-1	q25.3	46.23	protein_coding	5780
5.49e-05	0.00265	399.02	220.3	337.57	356.34	8069057	(2, 1), (2, 3), (2, 4)	PFKL	ENSG00000141959	phosphofructokinase, liver type [Source:HGNC Symbol;Acc:HGNC:8876]	chr21	44300051	44327376	1	q22.3	63.48	protein_coding	8926
4.9e-06	0.000499	549.1	481.97	276.45	841.93	7945371	(2, 4), (3, 4)	IFITM3	ENSG00000142089	interferon induced transmembrane protein 3 [Source:HGNC Symbol;Acc:HGNC:5414]	chr11	319676	329475	-1	p15.5	52.94	protein_coding	2844
0.0009412	0.0195	784.87	457.3	291.16	390.07	7897620	(3, 1), (4, 1)	PGD	ENSG00000142657	phosphogluconate dehydrogenase [Source:HGNC Symbol;Acc:HGNC:8891]	chr1	10398592	10420511	1	p36.22	47.54	protein_coding	3333
0.0044457	0.0511	369.97	335.71	285.36	451.43	7900792	(3, 4)	PTPRF	ENSG00000142949	protein tyrosine phosphatase receptor type F [Source:HGNC Symbol;Acc:HGNC:9670]	chr1	43525187	43623666	1	p34.2	55.69	protein_coding	10712
0.0068565	0.0657	101.38	125.54	121.86	195.2	7901256	(1, 4)	CYP4B1	ENSG00000142973	cytochrome P450 family 4 subfamily B member 1 [Source:HGNC Symbol;Acc:HGNC:2644]	chr1	46757838	46819413	1	p33	43.78	protein_coding	3466
0.0001074	0.00434	224.75	132.24	216.37	126.71	7903144	(2, 1), (4, 1), (2, 3), (4, 3)	SLC44A3	ENSG00000143036	solute carrier family 44 member 3 [Source:HGNC Symbol;Acc:HGNC:28689]	chr1	94820342	94895246	1	p21.3	43.92	protein_coding	2869
2e-07	4.2e-05	220.2	261.16	209.57	354.31	7903632	(1, 4), (2, 4), (3, 4)	CELSR2	ENSG00000143126	cadherin EGF LAG seven-pass G-type receptor 2 [Source:HGNC Symbol;Acc:HGNC:3231]	chr1	109249539	109275751	1	p13.3	60.19	protein_coding	12830
0.0009687	0.0199	742.28	720.18	1141.82	375.89	7907160	(4, 3)	ATP1B1	ENSG00000143153	ATPase Na+/K+ transporting subunit beta 1 [Source:HGNC Symbol;Acc:HGNC:804]	chr1	169105697	169132722	1	q24.2	43.48	protein_coding	2865
0.0016243	0.0274	250.99	176.44	220.72	151.32	7922095	(4, 1)	MPC2	ENSG00000143158	mitochondrial pyruvate carrier 2 [Source:HGNC Symbol;Acc:HGNC:24515]	chr1	167916675	167937072	-1	q24.2	37.94	protein_coding	2638
0.0045656	0.0519	428.04	306.15	209.62	307.16	7922051	(3, 1)	CREG1	ENSG00000143162	cellular repressor of E1A stimulated genes 1 [Source:HGNC Symbol;Acc:HGNC:2351]	chr1	167529117	167553805	-1	q24.2	44.5	protein_coding	3286
0.0005173	0.0127	186.17	243.35	306.69	143.66	7921916	(4, 2), (4, 3)	RGS5	ENSG00000143248	regulator of G protein signaling 5 [Source:HGNC Symbol;Acc:HGNC:10001]	chr1	163111121	163321791	-1	q23.3	37.67	protein_coding	6624
2.06e-05	0.00132	110.44	220.08	73.71	311.89	7921099	(1, 4), (3, 2), (3, 4)	CRABP2	ENSG00000143320	cellular retinoic acid binding protein 2 [Source:HGNC Symbol;Acc:HGNC:2339]	chr1	156699606	156705816	-1	q23.1	55.42	protein_coding	1082
1.13e-05	0.000854	266.18	345.79	161.25	504.74	7907861	(1, 4), (3, 2), (3, 4)	XPR1	ENSG00000143324	xenotropic and polytropic retrovirus receptor 1 [Source:HGNC Symbol;Acc:HGNC:12827]	chr1	180632022	180890279	1	q25.3	36.94	protein_coding	8913
0.0019427	0.0302	1142.28	677.52	515.5	779.06	7919751	(2, 1), (3, 1)	MCL1	ENSG00000143384	MCL1 apoptosis regulator, BCL2 family member [Source:HGNC Symbol;Acc:HGNC:6943]	chr1	150560895	150579738	-1	q21.2	47.56	protein_coding	6222
0.0050901	0.0558	421.27	321.63	209.3	366.54	7905365	(3, 1), (3, 4)	PIP5K1A	ENSG00000143398	phosphatidylinositol-4-phosphate 5-kinase type 1 alpha [Source:HGNC Symbol;Acc:HGNC:8994]	chr1	151197949	151249536	1	q21.3	45.21	protein_coding	5405
0.0006179	0.0143	63.9	33.01	28.31	23.29	7919787	(4, 1)	HORMAD1	ENSG00000143452	HORMA domain containing 1 [Source:HGNC Symbol;Acc:HGNC:25245]	chr1	150698060	150720895	-1	q21.3	36.72	protein_coding	2412
9.81e-05	0.00413	123.19	59.64	48.68	46.26	7909494	(2, 1), (3, 1), (4, 1)	SYT14	ENSG00000143469	synaptotagmin 14 [Source:HGNC Symbol;Acc:HGNC:23143]	chr1	209900923	210171389	1	q32.2	36.77	protein_coding	13977
0.0039077	0.0472	680.75	568.49	389.26	624.85	7905700	(3, 1), (3, 4)	UBAP2L	ENSG00000143569	ubiquitin associated protein 2 like [Source:HGNC Symbol;Acc:HGNC:29877]	chr1	154220179	154271510	1	q21.3	43.58	protein_coding	7503
0.0051754	0.0564	1014.51	978.17	511.48	944.99	7920317	(3, 1), (3, 2), (3, 4)	ILF2	ENSG00000143621	interleukin enhancer binding factor 2 [Source:HGNC Symbol;Acc:HGNC:6037]	chr1	153661788	153671028	-1	q21.3	44.32	protein_coding	2261
0.0003113	0.00902	186.84	135.61	50.81	118.08	7925525	(3, 1), (3, 2), (3, 4)	CEP170	ENSG00000143702	centrosomal protein 170 [Source:HGNC Symbol;Acc:HGNC:28920]	chr1	243124428	243255348	-1	q43	36.28	protein_coding	10939
0.0001367	0.00515	292.34	128.07	81.99	128.12	7910001	(2, 1), (3, 1), (4, 1)	DEGS1	ENSG00000143753	delta 4-desaturase, sphingolipid 1 [Source:HGNC Symbol;Acc:HGNC:13709]	chr1	224175756	224193441	1	q42.11	46.06	protein_coding	2446
0.000269	0.00829	195.74	169.11	312	205.14	7923635	(1, 3), (2, 3), (4, 3)	PLEKHA6	ENSG00000143850	pleckstrin homology domain containing A6 [Source:HGNC Symbol;Acc:HGNC:17053]	chr1	204218853	204377665	-1	q32.1	48.91	protein_coding	9656
2.61e-05	0.00152	583.99	317.96	368.56	289.6	8040473	(2, 1), (4, 1)	RHOB	ENSG00000143878	ras homolog family member B [Source:HGNC Symbol;Acc:HGNC:668]	chr2	20447074	20449440	1	p24.1	57.46	protein_coding	2367
< 1e-07	< 1e-07	141.86	437.3	208.84	888.12	8042356	(1, 2), (1, 4), (2, 4), (3, 4)	MEIS1	ENSG00000143995	Meis homeobox 1 [Source:HGNC Symbol;Acc:HGNC:7000]	chr2	66433452	66573869	1	p14	39.2	protein_coding	10942
1.11e-05	0.000854	161.92	140.72	303.94	138.41	8054479	(1, 3), (2, 3), (4, 3)	MALL	ENSG00000144063	mal, T cell differentiation protein like [Source:HGNC Symbol;Acc:HGNC:6818]	chr2	110083870	110116022	-1	q13	47.13	protein_coding	2623
0.0096333	0.0798	119.97	119.14	165.04	95.38	8046488	(4, 3)	CDCA7	ENSG00000144354	cell division cycle associated 7 [Source:HGNC Symbol;Acc:HGNC:14628]	chr2	173354820	173368997	1	q31.1	43.24	protein_coding	3934
0.0004929	0.0125	113.85	96.16	132.11	78.63	8058570	(4, 1), (4, 3)	KANSL1L	ENSG00000144445	KAT8 regulatory NSL complex subunit 1 like [Source:HGNC Symbol;Acc:HGNC:26310]	chr2	210021421	210171409	-1	q34	36.36	protein_coding	8519
0.0031194	0.0409	189.9	85.15	81.53	108.96	8079117	(2, 1), (3, 1), (4, 1)	ACKR2	ENSG00000144648	atypical chemokine receptor 2 [Source:HGNC Symbol;Acc:HGNC:1565]	chr3	42804752	42887974	1	p22.1	44.24	protein_coding	5460
4.84e-05	0.00243	303.52	138.65	241.9	136.2	8081386	(2, 1), (4, 1), (4, 3)	NFKBIZ	ENSG00000144802	NFKB inhibitor zeta [Source:HGNC Symbol;Acc:HGNC:29805]	chr3	101827991	101861022	1	q12.3	40.23	protein_coding	5902
0.0005407	0.013	93.3	127.14	139.08	160.24	8081686	(1, 4)	BOC	ENSG00000144857	BOC cell adhesion associated, oncogene regulated [Source:HGNC Symbol;Acc:HGNC:17173]	chr3	113211003	113287459	1	q13.2	47.04	protein_coding	10330
5.86e-05	0.00276	81.49	56.28	35.11	60.29	8090277	(3, 1), (3, 2), (3, 4)	OSBPL11	ENSG00000144909	oxysterol binding protein like 11 [Source:HGNC Symbol;Acc:HGNC:16397]	chr3	125528858	125595497	-1	q21.2	39.36	protein_coding	4598
0.0013887	0.0246	88.32	125.36	138.46	133.15	8101366	(1, 2), (1, 3), (1, 4)	SCD5	ENSG00000145284	stearoyl-CoA desaturase 5 [Source:HGNC Symbol;Acc:HGNC:21088]	chr4	82629539	82798796	-1	q21.22	43.56	protein_coding	4231
0.0032501	0.0418	141.75	104.05	82.87	87.82	8101624	(3, 1), (4, 1)	KLHL8	ENSG00000145332	kelch like family member 8 [Source:HGNC Symbol;Acc:HGNC:18644]	chr4	87160103	87240314	-1	q22.1	38.23	protein_coding	7354
0.0015142	0.0261	103.39	80.96	111.54	66.09	8102415	(4, 1), (4, 3)	CAMK2D	ENSG00000145349	calcium/calmodulin dependent protein kinase II delta [Source:HGNC Symbol;Acc:HGNC:1462]	chr4	113418054	113761927	-1	q26	36.23	protein_coding	8824
0.0016621	0.0277	299.78	145.09	86.49	180.46	8105040	(2, 1), (3, 1), (3, 4)	OSMR	ENSG00000145623	oncostatin M receptor [Source:HGNC Symbol;Acc:HGNC:8507]	chr5	38845858	38945596	1	p13.1	40.64	protein_coding	7174
5.7e-06	0.000548	72.53	93.63	262.66	73.8	8106354	(1, 3), (2, 3), (4, 3)	IQGAP2	ENSG00000145703	IQ motif containing GTPase activating protein 2 [Source:HGNC Symbol;Acc:HGNC:6111]	chr5	76403285	76708132	1	q13.3	40.46	protein_coding	7868
0.0051444	0.0564	321.76	230.03	159.78	204.2	8117140	(3, 1), (4, 1)	CDKAL1	ENSG00000145996	CDK5 regulatory subunit associated protein 1 like 1 [Source:HGNC Symbol;Acc:HGNC:21050]	chr6	20534457	21232404	1	p22.3	38.04	protein_coding	4602
0.0041627	0.0491	54.86	126.02	46.55	63.39	8126784	(1, 2), (3, 2), (4, 2)	PLA2G7	ENSG00000146070	phospholipase A2 group VII [Source:HGNC Symbol;Acc:HGNC:9040]	chr6	46704201	46735693	-1	p12.3	40.97	protein_coding	2059
0.0099651	0.0818	244.82	184.03	261.79	184.43	8123062	(4, 3)	TMEM181	ENSG00000146433	transmembrane protein 181 [Source:HGNC Symbol;Acc:HGNC:20958]	chr6	158536436	158635429	1	q25.3	47.37	protein_coding	5533
1e-07	2.57e-05	582.47	200.14	208.75	170.92	8139488	(2, 1), (3, 1), (4, 1)	IGFBP3	ENSG00000146674	insulin like growth factor binding protein 3 [Source:HGNC Symbol;Acc:HGNC:5472]	chr7	45912245	45921874	-1	p12.3	49.16	protein_coding	4569
4e-07	6.97e-05	34.67	41.39	92.78	32.36	8166747	(1, 3), (2, 3), (4, 3)	SYTL5	ENSG00000147041	synaptotagmin like 5 [Source:HGNC Symbol;Acc:HGNC:15589]	chrX	38006553	38128819	1	p11.4	37.6	protein_coding	4820
2.96e-05	0.00167	721.21	442.63	188.66	510.78	8167965	(3, 1), (3, 2), (3, 4)	MSN	ENSG00000147065	moesin [Source:HGNC Symbol;Acc:HGNC:7373]	chrX	65588377	65741931	1	q12	44.63	protein_coding	5987
0.0003961	0.0107	99.66	59.62	66.89	56.27	8149574	(2, 1), (4, 1)	CSGALNACT1	ENSG00000147408	chondroitin sulfate N-acetylgalactosaminyltransferase 1 [Source:HGNC Symbol;Acc:HGNC:24290]	chr8	19404161	19758029	-1	p21.3	41.74	protein_coding	6580
0.0016914	0.0279	513.29	367.4	233.39	352.35	8144931	(3, 1)	ATP6V1B2	ENSG00000147416	ATPase H+ transporting V1 subunit B2 [Source:HGNC Symbol;Acc:HGNC:854]	chr8	20197381	20226819	1	p21.3	39.5	protein_coding	7797
0.00593	0.061	190.53	125.37	217.94	143.02	8145291	(2, 3)	SLC25A37	ENSG00000147454	solute carrier family 25 member 37 [Source:HGNC Symbol;Acc:HGNC:29786]	chr8	23528956	23575463	1	p21.2	48.38	protein_coding	7996
0.0006977	0.0157	239.79	144.87	246.25	159.8	8145281	(2, 1), (4, 1), (2, 3), (4, 3)	SLC25A37	ENSG00000147454	solute carrier family 25 member 37 [Source:HGNC Symbol;Acc:HGNC:29786]	chr8	23528956	23575463	1	p21.2	48.38	protein_coding	7996
0.002937	0.0394	142.96	118.22	187.32	86.8	8145365	(4, 3)	DOCK5	ENSG00000147459	dedicator of cytokinesis 5 [Source:HGNC Symbol;Acc:HGNC:23476]	chr8	25184689	25418082	1	p21.2	42.37	protein_coding	15989
0.0068141	0.0656	285.62	268.72	156.3	262.57	8146914	(3, 1), (3, 2), (3, 4)	TERF1	ENSG00000147601	telomeric repeat binding factor 1 [Source:HGNC Symbol;Acc:HGNC:11728]	chr8	73008856	73048123	1	q21.11	36.99	protein_coding	15706
0.0066179	0.0647	290.51	390.05	201.94	349	8147654	(3, 2), (3, 4)	POLR2K	ENSG00000147669	RNA polymerase II, I and III subunit K [Source:HGNC Symbol;Acc:HGNC:9198]	chr8	100150623	100154003	1	q22.2	37.24	protein_coding	1673
0.0031499	0.0411	1054.46	1117.95	584.9	1655.75	8148040	(3, 4)	MAL2	ENSG00000147676	mal, T cell differentiation protein 2 [Source:HGNC Symbol;Acc:HGNC:13634]	chr8	119165034	119245673	1	q24.12	39.64	protein_coding	3438
0.0018146	0.0291	177.25	178.45	108.11	200.41	8180269	(3, 2), (3, 4)	TATDN1	ENSG00000147687	TatD DNase domain containing 1 [Source:HGNC Symbol;Acc:HGNC:24220]	chr8	124488485	124539458	-1	q24.13	40.76	protein_coding	4778
4.75e-05	0.00239	95.04	180.67	205.58	298.34	8160138	(1, 4)	NFIB	ENSG00000147862	nuclear factor I B [Source:HGNC Symbol;Acc:HGNC:7785]	chr9	14081843	14398983	-1	p22.3	38.29	protein_coding	12765
0.0090267	0.0769	320.95	217.23	129.56	158.79	8160297	(3, 1), (4, 1)	PLIN2	ENSG00000147872	perilipin 2 [Source:HGNC Symbol;Acc:HGNC:248]	chr9	19108375	19149290	-1	p22.1	44.99	protein_coding	5011
0.0073569	0.0684	276.02	222.08	167.65	215.74	8158597	(3, 1)	GPR107	ENSG00000148358	G protein-coupled receptor 107 [Source:HGNC Symbol;Acc:HGNC:17830]	chr9	130053426	130140169	1	q34.11	46.73	protein_coding	9139
0.0031837	0.0412	167.18	211.78	323.12	255.24	7930537	(1, 3), (1, 4)	TCF7L2	ENSG00000148737	transcription factor 7 like 2 [Source:HGNC Symbol;Acc:HGNC:11641]	chr10	112950247	113167678	1	q25.2	44.6	protein_coding	6739
0.0001089	0.00434	419.49	246.94	306.52	220.55	7938390	(2, 1), (4, 1)	ADM	ENSG00000148926	adrenomedullin [Source:HGNC Symbol;Acc:HGNC:259]	chr11	10305073	10307397	1	p15.4	58.97	protein_coding	2325
1.28e-05	0.000927	366.41	413.59	126.03	509.23	7940028	(3, 1), (3, 2), (3, 4)	SERPING1	ENSG00000149131	serpin family G member 1 [Source:HGNC Symbol;Acc:HGNC:1228]	chr11	57597387	57619171	1	q12.1	47.09	protein_coding	7231
0.009609	0.0798	134.29	287.33	114.03	221.02	7951077	(3, 2)	SESN3	ENSG00000149212	sestrin 3 [Source:HGNC Symbol;Acc:HGNC:23060]	chr11	95165513	95232541	-1	q21	35.27	protein_coding	10578
0.001155	0.0221	89.74	116.91	112.28	145.15	7950701	(1, 4)	TENM4	ENSG00000149256	teneurin transmembrane protein 4 [Source:HGNC Symbol;Acc:HGNC:29945]	chr11	78652829	79441030	-1	q14.1	44.45	protein_coding	16414
1.36e-05	0.000951	97.55	173.86	101.64	228.75	7932765	(1, 4), (3, 4)	MPP7	ENSG00000150054	membrane palmitoylated protein 7 [Source:HGNC Symbol;Acc:HGNC:26542]	chr10	28050993	28334486	-1	p12.1	38.78	protein_coding	6371
0.0004575	0.0118	69	61.37	98.92	54.39	8045499	(2, 3), (4, 3)	HNMT	ENSG00000150540	histamine N-methyltransferase [Source:HGNC Symbol;Acc:HGNC:5028]	chr2	137964020	138016364	1	q22.1	36.83	protein_coding	4756
2e-07	4.2e-05	100.25	263.05	91.29	398.97	8055314	(1, 2), (1, 4), (3, 2), (3, 4)	LYPD1	ENSG00000150551	LY6/PLAUR domain containing 1 [Source:HGNC Symbol;Acc:HGNC:28431]	chr2	132643286	132671579	-1	q21.2	45.08	protein_coding	3979
0.0004115	0.011	146	159.47	136.29	265.71	8045664	(1, 4), (2, 4), (3, 4)	LYPD6B	ENSG00000150556	LY6/PLAUR domain containing 6B [Source:HGNC Symbol;Acc:HGNC:27018]	chr2	149038107	149215262	1	q23.2	39.95	protein_coding	3539
2.06e-05	0.00132	88.44	109.99	49.5	28.26	7968678	(4, 1), (4, 2)	FREM2	ENSG00000150893	FRAS1 related extracellular matrix 2 [Source:HGNC Symbol;Acc:HGNC:25396]	chr13	38687077	38887131	1	q13.3	37.64	protein_coding	16275
4.5e-05	0.00232	206.02	89.52	102.01	105.66	8085797	(2, 1), (3, 1), (4, 1)	THRB	ENSG00000151090	thyroid hormone receptor beta [Source:HGNC Symbol;Acc:HGNC:11799]	chr3	24117153	24495756	-1	p24.2	38.87	protein_coding	10968
3.3e-06	0.000386	38.7	58.93	66.39	104.71	7973875	(1, 4), (2, 4)	NPAS3	ENSG00000151322	neuronal PAS domain protein 3 [Source:HGNC Symbol;Acc:HGNC:19311]	chr14	32934396	33820863	1	q13.1	38.3	protein_coding	10811
< 1e-07	2.57e-05	282.94	199.53	441.04	138.21	7961546	(4, 1), (2, 3), (4, 3)	EPS8	ENSG00000151491	epidermal growth factor receptor pathway substrate 8 [Source:HGNC Symbol;Acc:HGNC:3420]	chr12	15620134	15882329	-1	p12.3	37.25	protein_coding	8540
1.34e-05	0.00095	336.08	246.5	154.09	314.48	8050190	(3, 1), (3, 2), (3, 4)	ADAM17	ENSG00000151694	ADAM metallopeptidase domain 17 [Source:HGNC Symbol;Acc:HGNC:195]	chr2	9488486	9556732	-1	p25.1	41.31	protein_coding	10728
0.0001398	0.00515	133.67	179.59	382.93	142.37	7945169	(1, 3), (2, 3), (4, 3)	TMEM45B	ENSG00000151715	transmembrane protein 45B [Source:HGNC Symbol;Acc:HGNC:25194]	chr11	129815848	129860003	1	q24.3	44.32	protein_coding	2998
0.0082952	0.0735	211.7	123.52	117.18	126.2	8098470	(2, 1), (3, 1), (4, 1)	WWC2	ENSG00000151718	WW and C2 domain containing 2 [Source:HGNC Symbol;Acc:HGNC:24148]	chr4	183099257	183320777	1	q35.1	39.32	protein_coding	10002
7.2e-06	0.000627	370.1	134.02	118.08	126.96	8103951	(2, 1), (3, 1), (4, 1)	ACSL1	ENSG00000151726	acyl-CoA synthetase long chain family member 1 [Source:HGNC Symbol;Acc:HGNC:3569]	chr4	184755595	184826818	-1	q35.1	44.71	protein_coding	6134
0.0029887	0.0398	88.79	113.43	70.55	129.48	7962185	(3, 4)	AMN1	ENSG00000151743	antagonist of mitotic exit network 1 homolog [Source:HGNC Symbol;Acc:HGNC:27281]	chr12	31671142	31729121	-1	p11.21	40.53	protein_coding	3137
0.0082512	0.0733	364.1	466.07	318.62	542.81	7954717	(3, 4)	BICD1	ENSG00000151746	BICD cargo adaptor 1 [Source:HGNC Symbol;Acc:HGNC:1049]	chr12	32106835	32383633	1	p11.21	40.45	protein_coding	12868
0.0016054	0.0272	241.36	152.49	116.04	181.49	7979033	(2, 1), (3, 1), (3, 4)	SAV1	ENSG00000151748	salvador family WW domain containing protein 1 [Source:HGNC Symbol;Acc:HGNC:17795]	chr14	50632058	50668306	-1	q22.1	37.87	protein_coding	5605
< 1e-07	< 1e-07	183.54	126.78	265.39	93.37	8127234	(4, 1), (2, 3), (4, 3)	DST	ENSG00000151914	dystonin [Source:HGNC Symbol;Acc:HGNC:1090]	chr6	56457987	56954830	-1	p12.1	38.08	protein_coding	48142
0.0012865	0.0235	185.73	108.06	62.32	85.36	8023043	(3, 1), (4, 1)	PSTPIP2	ENSG00000152229	proline-serine-threonine phosphatase interacting protein 2 [Source:HGNC Symbol;Acc:HGNC:9581]	chr18	45983536	46072272	-1	q21.1	42.75	protein_coding	4120
0.0067164	0.0651	192.88	152.43	110.29	111.78	8106516	(4, 1)	JMY	ENSG00000152409	junction mediating and regulatory protein, p53 cofactor [Source:HGNC Symbol;Acc:HGNC:28916]	chr5	79236131	79327211	1	q14.1	40.21	protein_coding	9096
0.000368	0.0101	109.08	60.88	45.99	53.01	8112841	(2, 1), (3, 1), (4, 1)	HOMER1	ENSG00000152413	homer scaffold protein 1 [Source:HGNC Symbol;Acc:HGNC:17512]	chr5	79372636	79514134	-1	q14.1	37.2	protein_coding	6071
0.0026624	0.0371	54.84	53.59	118.81	55.9	8041644	(1, 3), (2, 3), (4, 3)	PLEKHH2	ENSG00000152527	pleckstrin homology, MyTH4 and FERM domain containing H2 [Source:HGNC Symbol;Acc:HGNC:30506]	chr2	43637260	43767987	1	p21	38.98	protein_coding	9848
0.0096577	0.0799	114.16	193.91	113.31	154.64	7954503	(1, 2), (3, 2)	MED21	ENSG00000152944	mediator complex subunit 21 [Source:HGNC Symbol;Acc:HGNC:11473]	chr12	27022546	27066343	1	p11.23	39.33	protein_coding	3632
0.0056586	0.0596	114.81	94.63	176.89	110.08	8056151	(2, 3), (4, 3)	PLA2R1	ENSG00000153246	phospholipase A2 receptor 1 [Source:HGNC Symbol;Acc:HGNC:9042]	chr2	159932006	160062615	-1	q24.2	39.22	protein_coding	15362
1.52e-05	0.00101	170.81	114.11	59.99	151.84	8056201	(3, 1), (3, 2), (3, 4)	RBMS1	ENSG00000153250	RNA binding motif single stranded interacting protein 1 [Source:HGNC Symbol;Acc:HGNC:9907]	chr2	160272151	160493807	-1	q24.2	39.2	protein_coding	11778
8.1e-06	0.000683	353.16	218.93	118.1	215.14	8152845	(2, 1), (3, 1), (4, 1), (3, 2), (3, 4)	CYRIB	ENSG00000153310	CYFIP related Rac1 interactor B [Source:HGNC Symbol;Acc:HGNC:25216]	chr8	129839593	130017129	-1	q24.21	42.04	protein_coding	9132
6.05e-05	0.00284	367.44	311.93	160.49	312.82	8152867	(3, 1), (3, 2), (3, 4)	ASAP1	ENSG00000153317	ArfGAP with SH3 domain, ankyrin repeat and PH domain 1 [Source:HGNC Symbol;Acc:HGNC:2720]	chr8	130052104	130443674	-1	q24.22	42.15	protein_coding	8294
0.0078028	0.0707	317.99	365.82	191.02	377.44	8078405	(3, 2), (3, 4)	CMTM7	ENSG00000153551	CKLF like MARVEL transmembrane domain containing 7 [Source:HGNC Symbol;Acc:HGNC:19178]	chr3	32391698	32483067	1	p22.3	45.15	protein_coding	3724
5e-07	8.16e-05	198.36	124.5	172.08	88.32	8130422	(2, 1), (4, 1), (4, 2), (4, 3)	CNKSR3	ENSG00000153721	CNKSR family member 3 [Source:HGNC Symbol;Acc:HGNC:23034]	chr6	154387515	154510685	-1	q25.2	42.74	protein_coding	21579
1.13e-05	0.000854	201.72	167.99	89.85	137.03	8081953	(3, 1), (4, 1), (3, 2), (3, 4)	GTF2E1	ENSG00000153767	general transcription factor IIE subunit 1 [Source:HGNC Symbol;Acc:HGNC:4650]	chr3	120742637	120783069	1	q13.33	38.04	protein_coding	3370
0.0031648	0.0412	295.87	213.01	173.37	173.61	8113305	(3, 1), (4, 1)	CHD1	ENSG00000153922	chromodomain helicase DNA binding protein 1 [Source:HGNC Symbol;Acc:HGNC:1915]	chr5	98853985	98929007	-1	q21.1	35.18	protein_coding	10487
0.0002344	0.00759	30.53	72.63	36.74	36.43	8140686	(1, 2), (3, 2), (4, 2)	SEMA3D	ENSG00000153993	semaphorin 3D [Source:HGNC Symbol;Acc:HGNC:10726]	chr7	84995553	85187056	-1	q21.11	34.17	protein_coding	8259
0.0031429	0.0411	91.02	96.33	190.3	104.82	8009301	(1, 3), (2, 3), (4, 3)	PRKCA	ENSG00000154229	protein kinase C alpha [Source:HGNC Symbol;Acc:HGNC:9393]	chr17	66302613	66810743	1	q24.2	43.87	protein_coding	11175
4.33e-05	0.00226	44.28	42.07	61.91	29.99	8017927	(4, 1), (4, 2), (4, 3)	ABCA9	ENSG00000154258	ATP binding cassette subfamily A member 9 [Source:HGNC Symbol;Acc:HGNC:39]	chr17	68974488	69060949	-1	q24.2	37.68	protein_coding	9024
0.0012595	0.0233	122.2	109.47	129.78	74.63	8018038	(4, 1), (4, 3)	ABCA5	ENSG00000154265	ATP binding cassette subfamily A member 5 [Source:HGNC Symbol;Acc:HGNC:35]	chr17	69244311	69327244	-1	q24.3	34.61	protein_coding	13158
0.0021122	0.032	86.85	57.1	87.24	52.67	8094550	(4, 1), (4, 3)	C4orf19	ENSG00000154274	chromosome 4 open reading frame 19 [Source:HGNC Symbol;Acc:HGNC:25618]	chr4	37453925	37623495	1	p14	41.01	protein_coding	4470
0.0057918	0.0603	302.36	538.58	310.37	541.95	8067955	(1, 4)	CXADR	ENSG00000154639	CXADR Ig-like cell adhesion molecule [Source:HGNC Symbol;Acc:HGNC:2559]	chr21	17513043	17593579	1	q21.1	39.97	protein_coding	6021
3.2e-06	0.000378	121.14	170.95	100.34	264.78	8069565	(1, 4), (2, 4), (3, 4)	BTG3	ENSG00000154640	BTG anti-proliferation factor 3 [Source:HGNC Symbol;Acc:HGNC:1132]	chr21	17593653	17612945	-1	q21.1	37.73	protein_coding	2304
0.0010683	0.0212	73.72	74.98	50.95	95.21	8069574	(3, 4)	C21orf91	ENSG00000154642	chromosome 21 open reading frame 91 [Source:HGNC Symbol;Acc:HGNC:16459]	chr21	17788974	17819386	-1	q21.1	37.16	protein_coding	6228
0.0001893	0.00657	58.24	68.2	61.59	95.98	8067969	(1, 4), (2, 4), (3, 4)	CHODL	ENSG00000154645	chondrolectin [Source:HGNC Symbol;Acc:HGNC:17807]	chr21	17901263	18267373	1	q21.1	37.04	protein_coding	3093
1.2e-05	0.000881	480.33	143.5	115.82	326.62	8069676	(2, 1), (3, 1), (2, 4), (3, 4)	ADAMTS1	ENSG00000154734	ADAM metallopeptidase with thrombospondin type 1 motif 1 [Source:HGNC Symbol;Acc:HGNC:217]	chr21	26835755	26845409	-1	q21.3	45.12	protein_coding	7303
0.0007585	0.0166	288.98	200.9	114.27	247.68	8147724	(3, 1), (3, 4)	ATP6V1C1	ENSG00000155097	ATPase H+ transporting V1 subunit C1 [Source:HGNC Symbol;Acc:HGNC:856]	chr8	103021063	103073051	1	q22.3	38.39	protein_coding	5851
0.0039084	0.0472	286.2	277	189.77	340.87	8067903	(3, 4)	USP25	ENSG00000155313	ubiquitin specific peptidase 25 [Source:HGNC Symbol;Acc:HGNC:12624]	chr21	15729982	15880064	1	q21.1	35.42	protein_coding	7861
0.0066631	0.0648	238.39	241.4	182.75	307.64	8136401	(3, 4)	NUP205	ENSG00000155561	nucleoporin 205 [Source:HGNC Symbol;Acc:HGNC:18658]	chr7	135557917	135648757	1	q33	38.99	protein_coding	7621
4.1e-06	0.000439	181.44	141.99	254.69	104.31	8149555	(4, 1), (2, 3), (4, 3)	PSD3	ENSG00000156011	pleckstrin and Sec7 domain containing 3 [Source:HGNC Symbol;Acc:HGNC:19093]	chr8	18527303	19084730	-1	p22	39.94	protein_coding	15228
0.0017405	0.0283	114.97	109.9	145.29	81.29	8149551	(4, 3)	PSD3	ENSG00000156011	pleckstrin and Sec7 domain containing 3 [Source:HGNC Symbol;Acc:HGNC:19093]	chr8	18527303	19084730	-1	p22	39.94	protein_coding	15228
0.0044042	0.0508	567.02	331.73	331.5	351.94	8180344	(2, 1), (3, 1), (4, 1)	GNAQ	ENSG00000156052	G protein subunit alpha q [Source:HGNC Symbol;Acc:HGNC:4390]	chr9	77716097	78031811	-1	q21.2	39.18	protein_coding	6972
0.0058717	0.0607	224.65	165.17	137.68	152.1	8068105	(3, 1), (4, 1)	BACH1	ENSG00000156273	BTB domain and CNC homolog 1 [Source:HGNC Symbol;Acc:HGNC:935]	chr21	29194071	29630751	1	q21.3	39.61	protein_coding	7666
0.0019147	0.0301	68.56	64.85	46.65	114.85	8120719	(2, 4), (3, 4)	CD109	ENSG00000156535	CD109 molecule [Source:HGNC Symbol;Acc:HGNC:21685]	chr6	73695785	73828316	1	q13	38.58	protein_coding	9782
0.0088136	0.0764	313.94	345.62	256.62	408.58	7948274	(3, 4)	UBE2L6	ENSG00000156587	ubiquitin conjugating enzyme E2 L6 [Source:HGNC Symbol;Acc:HGNC:12490]	chr11	57551656	57568284	-1	q12.1	48.66	protein_coding	2062
0.0043978	0.0507	269.72	160.96	115.32	252.28	8152703	(3, 1), (3, 4)	FBXO32	ENSG00000156804	F-box protein 32 [Source:HGNC Symbol;Acc:HGNC:16731]	chr8	123497889	123541206	-1	q24.13	44.08	protein_coding	7395
0.0008749	0.0186	227.59	112.6	169.51	104.59	8145669	(2, 1), (4, 1)	RBPMS	ENSG00000157110	RNA binding protein, mRNA processing factor [Source:HGNC Symbol;Acc:HGNC:19097]	chr8	30384511	30572256	1	p12	42.18	protein_coding	8894
0.0024152	0.0352	164.62	204.36	163.36	241.47	7916282	(1, 4), (3, 4)	LRP8	ENSG00000157193	LDL receptor related protein 8 [Source:HGNC Symbol;Acc:HGNC:6700]	chr1	53242364	53328469	-1	p32.3	51.87	protein_coding	19668
0.0029359	0.0394	85.55	92.97	154.46	93.01	8080511	(1, 3), (2, 3), (4, 3)	CACNA1D	ENSG00000157388	calcium voltage-gated channel subunit alpha1 D [Source:HGNC Symbol;Acc:HGNC:1391]	chr3	53328963	53813733	1	p21.1	43.72	protein_coding	19199
0.0027195	0.0376	54.2	94.71	68.06	46.63	8095110	(4, 2)	KIT	ENSG00000157404	KIT proto-oncogene, receptor tyrosine kinase [Source:HGNC Symbol;Acc:HGNC:6342]	chr4	54657918	54740715	1	q12	40.87	protein_coding	5563
0.0003025	0.0089	171.57	174.41	114.57	408.93	8068713	(2, 4), (3, 4)	MX1	ENSG00000157601	MX dynamin like GTPase 1 [Source:HGNC Symbol;Acc:HGNC:7532]	chr21	41420020	41470071	1	q22.3	47.98	protein_coding	17984
7.2e-06	0.000627	115.81	135.41	300.26	128.9	7939642	(1, 3), (2, 3), (4, 3)	CREB3L1	ENSG00000157613	cAMP responsive element binding protein 3 like 1 [Source:HGNC Symbol;Acc:HGNC:18856]	chr11	46277662	46321409	1	p11.2	52.83	protein_coding	4023
2.25e-05	0.00139	487.69	390.18	135.84	966.27	8094441	(2, 4), (3, 4)	SLC34A2	ENSG00000157765	solute carrier family 34 member 2 [Source:HGNC Symbol;Acc:HGNC:11020]	chr4	25648011	25678748	1	p15.2	47.92	protein_coding	5045
0.0029802	0.0398	189.99	151.4	86.74	176.45	8082911	(3, 1), (3, 4)	NCK1	ENSG00000158092	NCK adaptor protein 1 [Source:HGNC Symbol;Acc:HGNC:7664]	chr3	136862208	136951606	1	q22.3	39.32	protein_coding	5510
0.0001192	0.00466	240.36	102.29	102.52	96.46	8051322	(2, 1), (3, 1), (4, 1)	XDH	ENSG00000158125	xanthine dehydrogenase [Source:HGNC Symbol;Acc:HGNC:12805]	chr2	31334321	31414742	-1	p23.1	42.92	protein_coding	6064
0.0004981	0.0125	487.4	306.22	280.52	280.34	8043937	(2, 1), (3, 1), (4, 1)	CNOT11	ENSG00000158435	CCR4-NOT transcription complex subunit 11 [Source:HGNC Symbol;Acc:HGNC:25217]	chr2	101252886	101270316	1	q11.2	43.2	protein_coding	2702
0.0076538	0.0698	584.79	429.03	314.47	541.17	8066939	(3, 1), (3, 4)	B4GALT5	ENSG00000158470	beta-1,4-galactosyltransferase 5 [Source:HGNC Symbol;Acc:HGNC:928]	chr20	49632945	49713878	-1	q13.13	42.32	protein_coding	4722
0.0089044	0.0767	109.2	145.11	90.53	136.41	7942650	(3, 2), (3, 4)	EMSY	ENSG00000158636	EMSY transcriptional repressor, BRCA2 interacting [Source:HGNC Symbol;Acc:HGNC:18071]	chr11	76444923	76553025	1	q13.5	37.68	protein_coding	11783
0.0006179	0.0143	111.45	178.87	104.51	194.39	7901993	(1, 4), (3, 4)	CACHD1	ENSG00000158966	cache domain containing 1 [Source:HGNC Symbol;Acc:HGNC:29314]	chr1	64470129	64693058	1	p31.3	40.03	protein_coding	7022
0.0013108	0.0237	115.97	125.17	101.3	160.97	8069933	(3, 4)	MIS18A	ENSG00000159055	MIS18 kinetochore protein A [Source:HGNC Symbol;Acc:HGNC:1286]	chr21	32268228	32279049	-1	q22.11	40.71	protein_coding	1694
0.0092069	0.0775	132.58	141.67	77.16	152.07	7950654	(3, 2), (3, 4)	ALG8	ENSG00000159063	ALG8 alpha-1,3-glucosyltransferase [Source:HGNC Symbol;Acc:HGNC:23161]	chr11	78095244	78139660	-1	q14.1	42.08	protein_coding	9465
0.0055218	0.0588	585.52	433.34	315.43	436.93	8008139	(3, 1)	UBE2Z	ENSG00000159202	ubiquitin conjugating enzyme E2 Z [Source:HGNC Symbol;Acc:HGNC:25847]	chr17	48908407	48929056	1	q21.32	47.4	protein_coding	5715
0.004176	0.0491	333.8	200.33	223.79	220.91	8002041	(2, 1), (4, 1)	ATP6V0D1	ENSG00000159720	ATPase H+ transporting V0 subunit d1 [Source:HGNC Symbol;Acc:HGNC:13724]	chr16	67438014	67481181	-1	q22.1	53.77	protein_coding	8156
0.0025967	0.0366	278.32	252.33	236.5	345.97	8136918	(2, 4), (3, 4)	ZYX	ENSG00000159840	zyxin [Source:HGNC Symbol;Acc:HGNC:13200]	chr7	143381295	143391111	1	q34	57.96	protein_coding	3267
5.5e-06	0.000533	324.54	239.7	144.97	183.1	8072153	(3, 1), (4, 1), (3, 2)	CCDC117	ENSG00000159873	coiled-coil domain containing 117 [Source:HGNC Symbol;Acc:HGNC:26599]	chr22	28772674	28789301	1	q12.1	44.33	protein_coding	4326
0.0005995	0.0141	150.63	99.73	132.55	87.75	8161174	(4, 1), (4, 3)	GNE	ENSG00000159921	glucosamine (UDP-N-acetyl)-2-epimerase/N-acetylmannosamine kinase [Source:HGNC Symbol;Acc:HGNC:23657]	chr9	36214441	36277042	-1	p13.3	43.82	protein_coding	5856
< 1e-07	< 1e-07	74.34	92.76	239.53	82.36	8070567	(1, 3), (2, 3), (4, 3)	TFF3	ENSG00000160180	trefoil factor 3 [Source:HGNC Symbol;Acc:HGNC:11757]	chr21	42311667	42315409	-1	q22.3	54.29	protein_coding	922
6e-07	9.35e-05	132.07	156.84	176.04	326.87	8070584	(1, 4), (2, 4), (3, 4)	TMPRSS3	ENSG00000160183	transmembrane serine protease 3 [Source:HGNC Symbol;Acc:HGNC:11877]	chr21	42371887	42396091	-1	q22.3	50.64	protein_coding	4908
0.0062359	0.0624	224.84	158.27	166.22	214.75	8068833	(2, 4)	PDE9A	ENSG00000160191	phosphodiesterase 9A [Source:HGNC Symbol;Acc:HGNC:8795]	chr21	42653621	42775509	1	q22.3	51.29	protein_coding	5281
2e-07	4.2e-05	216.51	135.95	155.45	271.02	8070632	(2, 1), (2, 4), (3, 4)	CBS	ENSG00000160200	cystathionine beta-synthase [Source:HGNC Symbol;Acc:HGNC:1550]	chr21	43053191	43076943	-1	q22.3	59.18	protein_coding	6786
0.0007976	0.0172	1767.04	995.49	742.95	1080.57	8070701	(2, 1), (3, 1), (4, 1)	CSTB	ENSG00000160213	cystatin B [Source:HGNC Symbol;Acc:HGNC:2482]	chr21	43772511	43776330	-1	q22.3	53.64	protein_coding	3820
0.0006693	0.0153	203.08	111.83	129.68	114.4	8164967	(2, 1), (4, 1)	VAV2	ENSG00000160293	vav guanine nucleotide exchange factor 2 [Source:HGNC Symbol;Acc:HGNC:12658]	chr9	133761894	133992604	-1	q34.2	56.31	protein_coding	5682
0.0011914	0.0226	68.96	62.3	62.82	90.1	7905581	(2, 4)	S100A1	ENSG00000160678	S100 calcium binding protein A1 [Source:HGNC Symbol;Acc:HGNC:10486]	chr1	153627926	153632039	1	q21.3	55.61	protein_coding	3030
0.0010825	0.0214	216.29	141.37	212.76	205.33	7906085	(2, 1), (2, 3), (2, 4)	LMNA	ENSG00000160789	lamin A/C [Source:HGNC Symbol;Acc:HGNC:6636]	chr1	156082573	156140081	1	q22	53.03	protein_coding	8141
0.0004009	0.0108	114.12	113.13	225.23	111	8141374	(1, 3), (2, 3), (4, 3)	AZGP1	ENSG00000160862	alpha-2-glycoprotein 1, zinc-binding [Source:HGNC Symbol;Acc:HGNC:910]	chr7	99966720	99976042	-1	q22.1	48.33	protein_coding	2584
0.0053821	0.0576	18.02	22.32	31.77	21.79	8141317	(1, 3), (4, 3)	CYP3A4	ENSG00000160868	cytochrome P450 family 3 subfamily A member 4 [Source:HGNC Symbol;Acc:HGNC:2637]	chr7	99756960	99784248	-1	q22.1	39.6	protein_coding	3384
0.0002769	0.00847	688.49	459.81	212.64	696.23	8148572	(3, 1), (3, 4)	LY6E	ENSG00000160932	lymphocyte antigen 6 family member E [Source:HGNC Symbol;Acc:HGNC:6727]	chr8	143017982	143023832	1	q24.3	63.58	protein_coding	2638
0.0065099	0.0642	38.48	46.7	25.02	48.36	8028194	(3, 2), (3, 4)	ZNF382	ENSG00000161298	zinc finger protein 382 [Source:HGNC Symbol;Acc:HGNC:17409]	chr19	36604817	36634114	1	q13.12	41.92	protein_coding	11319
0.0016739	0.0278	238.76	131.59	127.98	155.72	7963786	(2, 1), (3, 1), (4, 1)	ITGA5	ENSG00000161638	integrin subunit alpha 5 [Source:HGNC Symbol;Acc:HGNC:6141]	chr12	54395261	54419266	-1	q13.13	52.45	protein_coding	7383
0.0010942	0.0216	235.23	220	439.65	168.73	7913237	(4, 3)	CAMK2N1	ENSG00000162545	calcium/calmodulin dependent protein kinase II inhibitor 1 [Source:HGNC Symbol;Acc:HGNC:24190]	chr1	20482391	20486210	-1	p36.12	57.49	protein_coding	2605
0.0051503	0.0564	81.07	158.81	141.51	177.51	7901788	(1, 2), (1, 4)	NFIA	ENSG00000162599	nuclear factor I A [Source:HGNC Symbol;Acc:HGNC:7784]	chr1	60865259	61462788	1	p31.3	40.05	protein_coding	55886
0.0031423	0.0411	142.76	169.41	106.36	207.85	7901867	(3, 4)	USP1	ENSG00000162607	ubiquitin specific peptidase 1 [Source:HGNC Symbol;Acc:HGNC:12607]	chr1	62436297	62451804	1	p31.3	39.48	protein_coding	3869
1e-07	2.57e-05	257.3	289.67	166.96	477.77	7906564	(1, 4), (2, 4), (3, 4)	PEA15	ENSG00000162734	proliferation and apoptosis adaptor protein 15 [Source:HGNC Symbol;Acc:HGNC:8822]	chr1	160205380	160215376	1	q23.2	51.75	protein_coding	2763
< 1e-07	< 1e-07	216.1	102.28	878.42	91.05	7923929	(1, 3), (4, 1), (2, 3), (4, 3)	PIGR	ENSG00000162896	polymeric immunoglobulin receptor [Source:HGNC Symbol;Acc:HGNC:8968]	chr1	206928522	206946466	-1	q32.1	49.28	protein_coding	4372
0.0024994	0.0358	393.85	271.26	428.88	437.13	7909967	(2, 4)	CAPN2	ENSG00000162909	calpain 2 [Source:HGNC Symbol;Acc:HGNC:1479]	chr1	223701593	223776018	1	q41	48.73	protein_coding	8585
0.0075905	0.0695	400.42	304.23	217.2	354.67	7924582	(3, 1), (3, 4)	WDR26	ENSG00000162923	WD repeat domain 26 [Source:HGNC Symbol;Acc:HGNC:21208]	chr1	224385146	224437033	-1	q42.12	38.39	protein_coding	11146
0.0029162	0.0393	244.73	166.41	132.89	153.25	8042144	(3, 1), (4, 1)	REL	ENSG00000162924	REL proto-oncogene, NF-kB subunit [Source:HGNC Symbol;Acc:HGNC:9954]	chr2	60881521	60931612	1	p16.1	37.61	protein_coding	13172
5.46e-05	0.00265	71.75	143	87.22	160.46	8053349	(1, 2), (1, 4), (3, 4)	LRRTM1	ENSG00000162951	leucine rich repeat transmembrane neuronal 1 [Source:HGNC Symbol;Acc:HGNC:19408]	chr2	80288351	80304752	-1	p12	44.28	protein_coding	5047
0.0004168	0.011	177.31	123	122.85	107.45	8040374	(2, 1), (4, 1)	LRATD1	ENSG00000162981	LRAT domain containing 1 [Source:HGNC Symbol;Acc:HGNC:20743]	chr2	14632700	14650814	1	p24.3	41.55	protein_coding	8365
< 1e-07	< 1e-07	38.47	40.42	132.39	40.76	8046099	(1, 3), (2, 3), (4, 3)	NOSTRIN	ENSG00000163072	nitric oxide synthase trafficking [Source:HGNC Symbol;Acc:HGNC:20203]	chr2	168786539	168865514	1	q24.3	41.13	protein_coding	5248
0.0065523	0.0643	393.1	223.02	315.61	231.22	8096489	(2, 1), (4, 1)	PDLIM5	ENSG00000163110	PDZ and LIM domain 5 [Source:HGNC Symbol;Acc:HGNC:17468]	chr4	94451857	94668227	1	q22.3	36.89	protein_coding	11090
0.0023898	0.0349	111.79	72.47	59.45	69.66	8047854	(2, 1), (3, 1), (4, 1)	CCNYL1	ENSG00000163249	cyclin Y like 1 [Source:HGNC Symbol;Acc:HGNC:26868]	chr2	207711540	207761839	1	q33.3	41.55	protein_coding	4707
< 1e-07	< 1e-07	182.42	128.73	401.11	95.44	8101260	(1, 3), (4, 1), (2, 3), (4, 3)	ANTXR2	ENSG00000163297	ANTXR cell adhesion molecule 2 [Source:HGNC Symbol;Acc:HGNC:21732]	chr4	79901146	80125454	-1	q21.21	35.81	protein_coding	10149
0.0089564	0.0768	273.14	194.58	357.92	318.05	7908793	(2, 3), (2, 4)	ELF3	ENSG00000163435	E74 like ETS transcription factor 3 [Source:HGNC Symbol;Acc:HGNC:3318]	chr1	202007945	202017183	1	q32.1	54.8	protein_coding	7186
0.0087683	0.0763	663.46	370.83	465.36	360.23	8100541	(2, 1), (4, 1)	IGFBP7	ENSG00000163453	insulin like growth factor binding protein 7 [Source:HGNC Symbol;Acc:HGNC:5476]	chr4	57030773	57110385	-1	q12	42.44	protein_coding	1930
0.0002914	0.00879	186.79	147.48	109.64	205.24	7923753	(3, 1), (2, 4), (3, 4)	NUAK2	ENSG00000163545	NUAK family kinase 2 [Source:HGNC Symbol;Acc:HGNC:29558]	chr1	205302063	205321745	-1	q32.1	51.29	protein_coding	3391
7.13e-05	0.0032	363.04	432.33	243.9	695.8	8083854	(1, 4), (3, 4)	PRKCI	ENSG00000163558	protein kinase C iota [Source:HGNC Symbol;Acc:HGNC:9404]	chr3	170222424	170305977	1	q26.2	39.8	protein_coding	5778
0.0072727	0.0681	149.2	76.48	108.62	65.5	8088491	(4, 1)	CADPS	ENSG00000163618	calcium dependent secretion activator [Source:HGNC Symbol;Acc:HGNC:1426]	chr3	62398346	62875416	-1	p14.2	40	protein_coding	14665
0.0003542	0.0099	292.29	164.44	159.8	168.1	8101511	(2, 1), (3, 1), (4, 1)	WDFY3	ENSG00000163625	WD repeat and FYVE domain containing 3 [Source:HGNC Symbol;Acc:HGNC:20751]	chr4	84669597	84966690	-1	q21.23	36.91	protein_coding	17168
0.0045303	0.0516	391.8	195.55	213.77	170.29	8088560	(2, 1), (4, 1)	ADAMTS9	ENSG00000163638	ADAM metallopeptidase with thrombospondin type 1 motif 9 [Source:HGNC Symbol;Acc:HGNC:13202]	chr3	64515654	64688000	-1	p14.1	40.09	protein_coding	10680
0.0036986	0.0456	304.61	260.82	163.13	289.42	8083523	(3, 1), (3, 4)	GMPS	ENSG00000163655	guanine monophosphate synthase [Source:HGNC Symbol;Acc:HGNC:4378]	chr3	155870650	155944020	1	q25.31	38.82	protein_coding	8765
0.0049634	0.0549	468	346.89	270.18	414.76	8091658	(3, 1), (3, 4)	CCNL1	ENSG00000163660	cyclin L1 [Source:HGNC Symbol;Acc:HGNC:20569]	chr3	157146508	157160760	-1	q25.31	37.3	protein_coding	8729
0.0071975	0.0677	628.98	578.12	356.75	567.27	8083183	(3, 1), (3, 2), (3, 4)	U2SURP	ENSG00000163714	U2 snRNP associated SURP domain containing [Source:HGNC Symbol;Acc:HGNC:30855]	chr3	142964497	143060725	1	q23	38.44	protein_coding	11297
0.0033347	0.0424	259.96	216.47	123.12	211.97	8083282	(3, 1), (3, 2), (3, 4)	HPS3	ENSG00000163755	HPS3 biogenesis of lysosomal organelles complex 2 subunit 1 [Source:HGNC Symbol;Acc:HGNC:15597]	chr3	149129638	149173732	1	q24	38.65	protein_coding	6202
0.0066588	0.0648	241.19	295.94	174.53	298.24	8090772	(3, 2), (3, 4)	TOPBP1	ENSG00000163781	DNA topoisomerase II binding protein 1 [Source:HGNC Symbol;Acc:HGNC:17008]	chr3	133598175	133662380	-1	q22.1	37.94	protein_coding	7337
0.0091049	0.0772	323.99	332.82	197.03	313.76	8041149	(3, 1), (3, 2), (3, 4)	WDR43	ENSG00000163811	WD repeat domain 43 [Source:HGNC Symbol;Acc:HGNC:28945]	chr2	28894667	28948219	1	p23.2	39.27	protein_coding	4103
0.0019196	0.0301	293.67	240.89	127.01	325.87	8082075	(3, 1), (3, 4)	DTX3L	ENSG00000163840	deltex E3 ubiquitin ligase 3L [Source:HGNC Symbol;Acc:HGNC:30323]	chr3	122564338	122575203	1	q21.1	44.22	protein_coding	5768
0.0062041	0.0622	201.79	190.73	124.26	194.97	8090237	(3, 1), (3, 2), (3, 4)	ZNF148	ENSG00000163848	zinc finger protein 148 [Source:HGNC Symbol;Acc:HGNC:12933]	chr3	125225669	125375325	-1	q21.2	36.86	protein_coding	10437
7.7e-06	0.00066	58.06	53.16	183.1	59.81	8092541	(1, 3), (2, 3), (4, 3)	LIPH	ENSG00000163898	lipase H [Source:HGNC Symbol;Acc:HGNC:18483]	chr3	185506262	185552588	-1	q27.2	43.66	protein_coding	4097
0.0083862	0.0739	363.53	350.07	233.97	407.24	8092534	(3, 4)	TMEM41A	ENSG00000163900	transmembrane protein 41A [Source:HGNC Symbol;Acc:HGNC:30544]	chr3	185476496	185499057	-1	q27.2	44.99	protein_coding	8668
0.0024977	0.0358	709.12	603.57	346.17	638.08	8090490	(3, 1), (3, 2), (3, 4)	RPN1	ENSG00000163902	ribophorin I [Source:HGNC Symbol;Acc:HGNC:10381]	chr3	128619969	128681075	-1	q21.3	46.98	protein_coding	3965
0.0035231	0.0442	162.42	211.09	125.31	223.63	8092640	(3, 2), (3, 4)	RFC4	ENSG00000163918	replication factor C subunit 4 [Source:HGNC Symbol;Acc:HGNC:9972]	chr3	186789880	186807058	-1	q27.3	40.5	protein_coding	2997
0.0051838	0.0564	77.82	105.47	64.07	111.55	8092654	(3, 4)	RPL39L	ENSG00000163923	ribosomal protein L39 like [Source:HGNC Symbol;Acc:HGNC:17094]	chr3	187120948	187180908	-1	q27.3	41.84	protein_coding	1033
0.0023225	0.0342	242.51	248.8	247.27	362.38	8080487	(1, 4), (2, 4)	PRKCD	ENSG00000163932	protein kinase C delta [Source:HGNC Symbol;Acc:HGNC:9399]	chr3	53156009	53192717	1	p21.1	56.58	protein_coding	3619
0.0068064	0.0656	181.97	172.89	145.67	215.48	8088092	(3, 4)	RFT1	ENSG00000163933	RFT1 homolog [Source:HGNC Symbol;Acc:HGNC:30220]	chr3	53088483	53130453	-1	p21.1	45.76	protein_coding	5479
0.0041684	0.0491	148.56	199.31	99.39	198.04	8088247	(3, 2), (3, 4)	ARHGEF3	ENSG00000163947	Rho guanine nucleotide exchange factor 3 [Source:HGNC Symbol;Acc:HGNC:683]	chr3	56727418	57079329	-1	p14.3	43.62	protein_coding	6576
0.0097865	0.0808	294.36	316.17	178.88	301.4	8093112	(3, 2), (3, 4)	UBXN7	ENSG00000163960	UBX domain protein 7 [Source:HGNC Symbol;Acc:HGNC:29119]	chr3	196347662	196432430	-1	q29	42.27	protein_coding	11247
0.0039913	0.0477	119.83	107.93	186.31	102.71	8093950	(2, 3), (4, 3)	S100P	ENSG00000163993	S100 calcium binding protein P [Source:HGNC Symbol;Acc:HGNC:10504]	chr4	6693878	6697170	1	p16.1	53.54	protein_coding	471
0.0055927	0.0593	258.01	245.35	231.01	329.62	8086908	(2, 4)	PLXNB1	ENSG00000164050	plexin B1 [Source:HGNC Symbol;Acc:HGNC:9103]	chr3	48403854	48430086	-1	p21.31	59.81	protein_coding	9768
0.0045909	0.052	108.94	48.58	47.2	46.62	8097335	(2, 1), (4, 1)	HSPA4L	ENSG00000164070	heat shock protein family A (Hsp70) member 4 like [Source:HGNC Symbol;Acc:HGNC:17041]	chr4	127781821	127840733	1	q28.1	35.4	protein_coding	11439
0.0090636	0.077	140.21	112.72	88.69	98.65	8102730	(3, 1), (4, 1)	MFSD8	ENSG00000164073	major facilitator superfamily domain containing 8 [Source:HGNC Symbol;Acc:HGNC:28486]	chr4	127917799	127966034	-1	q28.2	39.23	protein_coding	8849
1.33e-05	0.00095	88.44	91.61	240.66	94.41	8102468	(1, 3), (2, 3), (4, 3)	PRSS12	ENSG00000164099	serine protease 12 [Source:HGNC Symbol;Acc:HGNC:9477]	chr4	118280038	118353003	-1	q26	36.51	protein_coding	5725
< 1e-07	2.57e-05	182.57	46.06	42.92	47.46	8098348	(2, 1), (3, 1), (4, 1)	CEP44	ENSG00000164118	centrosomal protein 44 [Source:HGNC Symbol;Acc:HGNC:29356]	chr4	174283730	174333380	1	q34.1	35.65	protein_coding	7079
0.0001249	0.00485	104.29	54.07	81.45	50.94	8098041	(2, 1), (4, 1)	TMEM144	ENSG00000164124	transmembrane protein 144 [Source:HGNC Symbol;Acc:HGNC:25633]	chr4	158201604	158255416	1	q32.1	37.8	protein_coding	9248
0.0060643	0.0616	129.34	99.25	71.39	124.61	8103011	(3, 1), (3, 4)	OTUD4	ENSG00000164164	OTU deubiquitinase 4 [Source:HGNC Symbol;Acc:HGNC:24949]	chr4	145110838	145180589	-1	q31.21	37.6	protein_coding	9513
0.0017924	0.029	109.99	79.31	66	69.53	8103079	(3, 1), (4, 1)	PRMT9	ENSG00000164169	protein arginine methyltransferase 9 [Source:HGNC Symbol;Acc:HGNC:25099]	chr4	147637785	147684163	-1	q31.23	39.64	protein_coding	3952
0.0001132	0.00444	201.67	122.43	245.39	101.45	8105267	(4, 1), (2, 3), (4, 3)	ITGA2	ENSG00000164171	integrin subunit alpha 2 [Source:HGNC Symbol;Acc:HGNC:6137]	chr5	52989340	53094779	1	q11.2	38.01	protein_coding	7896
0.0001382	0.00515	217.41	138.85	126.33	71.14	8106986	(4, 1), (4, 2)	RHOBTB3	ENSG00000164292	Rho related BTB domain containing 3 [Source:HGNC Symbol;Acc:HGNC:18757]	chr5	95713522	95824383	1	q15	40.56	protein_coding	8827
0.0081388	0.0727	156.32	173.68	107.69	153.11	8111698	(3, 2), (3, 4)	RICTOR	ENSG00000164327	RPTOR independent companion of MTOR complex 2 [Source:HGNC Symbol;Acc:HGNC:28611]	chr5	38937920	39074399	-1	p13.1	35.53	protein_coding	13540
2.33e-05	0.00142	434.34	180.33	214.6	196.23	8129937	(2, 1), (3, 1), (4, 1)	CITED2	ENSG00000164442	Cbp/p300 interacting transactivator with Glu/Asp rich carboxy-terminal domain 2 [Source:HGNC Symbol;Acc:HGNC:1987]	chr6	139371807	139374648	-1	q24.1	50.46	protein_coding	2563
0.0013508	0.0241	222.77	161.48	132.14	150.88	8110032	(2, 1), (3, 1), (4, 1)	CREBRF	ENSG00000164463	CREB3 regulatory factor [Source:HGNC Symbol;Acc:HGNC:24050]	chr5	173056352	173139284	1	q35.1	41.07	protein_coding	12333
0.0001898	0.00657	90.65	212.52	144.57	242.85	8138489	(1, 2), (1, 4)	CDCA7L	ENSG00000164649	cell division cycle associated 7 like [Source:HGNC Symbol;Acc:HGNC:30777]	chr7	21900899	21945903	-1	p15.3	41.36	protein_coding	3894
0.0005	0.0125	164.9	97.81	97.19	85.78	8123080	(2, 1), (4, 1)	SYTL3	ENSG00000164674	synaptotagmin like 3 [Source:HGNC Symbol;Acc:HGNC:15587]	chr6	158650014	158764876	1	q25.3	46.02	protein_coding	2896
0.0008405	0.018	1160.13	1070.73	493.63	1325.51	8149330	(3, 1), (3, 2), (3, 4)	CTSB	ENSG00000164733	cathepsin B [Source:HGNC Symbol;Acc:HGNC:2527]	chr8	11842524	11869533	-1	p23.1	52.18	protein_coding	10541
0.000528	0.0128	250.19	301.98	222.15	387.59	8146462	(1, 4), (3, 4)	SOX17	ENSG00000164736	SRY-box transcription factor 17 [Source:HGNC Symbol;Acc:HGNC:18122]	chr8	54457935	54460892	1	q11.23	59.36	protein_coding	2346
0.0002869	0.00868	49.76	43.36	94	39.64	8146986	(1, 3), (2, 3), (4, 3)	HNF4G	ENSG00000164749	hepatocyte nuclear factor 4 gamma [Source:HGNC Symbol;Acc:HGNC:5026]	chr8	75407914	75566834	1	q21.13	35.5	protein_coding	4797
0.0075049	0.069	581.44	562.33	322.91	651.38	8152477	(3, 4)	RAD21	ENSG00000164754	RAD21 cohesin complex component [Source:HGNC Symbol;Acc:HGNC:9811]	chr8	116845934	116874776	-1	q24.11	35.95	protein_coding	6103
0.0003024	0.0089	138.97	61.73	41.54	65.56	8149097	(2, 1), (3, 1), (4, 1)	DEFB1	ENSG00000164825	defensin beta 1 [Source:HGNC Symbol;Acc:HGNC:2766]	chr8	6870592	6877936	-1	p23.1	44.41	protein_coding	375
0.0012959	0.0236	285.73	233.63	112.9	278.95	8147766	(3, 1), (3, 2), (3, 4)	FZD6	ENSG00000164930	frizzled class receptor 6 [Source:HGNC Symbol;Acc:HGNC:4044]	chr8	103298433	103332866	1	q22.3	37.65	protein_coding	4065
0.0064338	0.0635	186.15	152.71	113.61	192.55	8151842	(3, 4)	VIRMA	ENSG00000164944	vir like m6A methyltransferase associated [Source:HGNC Symbol;Acc:HGNC:24500]	chr8	94487689	94553529	-1	q22.1	38.74	protein_coding	10775
0.006599	0.0646	143.05	120.82	68.74	138.91	8147313	(3, 1), (3, 4)	TMEM67	ENSG00000164953	transmembrane protein 67 [Source:HGNC Symbol;Acc:HGNC:28396]	chr8	93754844	93819234	1	q22.1	37.38	protein_coding	11732
0.0022043	0.0331	56.57	90.96	53.91	92.54	8160238	(1, 4), (3, 4)	PSIP1	ENSG00000164985	PC4 and SFRS1 interacting protein 1 [Source:HGNC Symbol;Acc:HGNC:9527]	chr9	15464066	15510995	-1	p22.3	37.86	protein_coding	6744
0.0014141	0.0249	189.22	330.51	199.67	318.52	8180299	(1, 2), (1, 4)	PSIP1	ENSG00000164985	PC4 and SFRS1 interacting protein 1 [Source:HGNC Symbol;Acc:HGNC:9527]	chr9	15464066	15510995	-1	p22.3	37.86	protein_coding	6744
0.0018077	0.0291	228.42	154.33	121.46	197.69	8162940	(3, 1), (3, 4)	ABCA1	ENSG00000165029	ATP binding cassette subfamily A member 1 [Source:HGNC Symbol;Acc:HGNC:29]	chr9	104781006	104928155	-1	q31.1	43.42	protein_coding	11343
3e-07	5.51e-05	147.02	71.19	62.12	76.04	8162276	(2, 1), (3, 1), (4, 1)	NFIL3	ENSG00000165030	nuclear factor, interleukin 3 regulated [Source:HGNC Symbol;Acc:HGNC:7787]	chr9	91409045	91423832	-1	q22.31	41.89	protein_coding	2055
2e-06	0.000251	221.14	284.72	430.12	100.48	8161755	(4, 1), (4, 2), (4, 3)	ALDH1A1	ENSG00000165092	aldehyde dehydrogenase 1 family member A1 [Source:HGNC Symbol;Acc:HGNC:402]	chr9	72900671	73080442	-1	q21.13	36.05	protein_coding	2840
0.0003233	0.00918	542.53	286.86	233.31	327.75	8146285	(2, 1), (3, 1), (4, 1)	HGSNAT	ENSG00000165102	heparan-alpha-glucosaminide N-acetyltransferase [Source:HGNC Symbol;Acc:HGNC:26527]	chr8	43140464	43202855	1	p11.21	44.1	protein_coding	8934
0.0002189	0.00721	141.44	98.43	223.31	103.96	8162502	(2, 3), (4, 3)	FBP1	ENSG00000165140	fructose-bisphosphatase 1 [Source:HGNC Symbol;Acc:HGNC:3606]	chr9	94603133	94640249	-1	q22.32	48.66	protein_coding	1910
5.1e-06	0.000514	46.8	112.06	59.52	100.75	8173933	(1, 2), (1, 4), (3, 2), (3, 4)	PCDH19	ENSG00000165194	protocadherin 19 [Source:HGNC Symbol;Acc:HGNC:14270]	chrX	100291644	100410273	-1	q22.1	40.09	protein_coding	9756
0.0035053	0.044	140.22	134.41	96.15	97.8	8171418	(4, 1), (4, 2)	PIGA	ENSG00000165195	phosphatidylinositol glycan anchor biosynthesis class A [Source:HGNC Symbol;Acc:HGNC:8957]	chrX	15319452	15335554	-1	p22.2	39.52	protein_coding	6294
0.003792	0.0462	94.98	101.03	82.58	126.56	7926677	(3, 4)	OTUD1	ENSG00000165312	OTU deubiquitinase 1 [Source:HGNC Symbol;Acc:HGNC:27346]	chr10	23439075	23442377	1	p12.2	53.28	protein_coding	3303
0.0034726	0.0437	263.06	268.69	242.81	368.29	7942342	(2, 4), (3, 4)	INPPL1	ENSG00000165458	inositol polyphosphate phosphatase like 1 [Source:HGNC Symbol;Acc:HGNC:6080]	chr11	72223701	72239147	1	q13.4	58.53	protein_coding	6574
3e-07	5.51e-05	150.99	104.49	219.57	97.28	7970455	(4, 1), (2, 3), (4, 3)	CRYL1	ENSG00000165475	crystallin lambda 1 [Source:HGNC Symbol;Acc:HGNC:18246]	chr13	20403666	20525873	-1	q12.11	44.52	protein_coding	4327
1.3e-06	0.000181	190.22	171.98	150.39	265.13	7934553	(1, 4), (2, 4), (3, 4)	ZNF503	ENSG00000165655	zinc finger protein 503 [Source:HGNC Symbol;Acc:HGNC:23589]	chr10	75397830	75401764	-1	q22.2	61.14	protein_coding	3205
0.0014711	0.0256	186.04	305.2	228.88	508.44	7976443	(1, 4)	IFI27	ENSG00000165949	interferon alpha inducible protein 27 [Source:HGNC Symbol;Acc:HGNC:5397]	chr14	94104836	94116698	1	q32.12	48.7	protein_coding	4147
0.0045829	0.052	441.28	547.91	271.14	560.56	7928171	(3, 2), (3, 4)	SGPL1	ENSG00000166224	sphingosine-1-phosphate lyase 1 [Source:HGNC Symbol;Acc:HGNC:10817]	chr10	70815948	70881184	1	q22.1	41.07	protein_coding	7510
0.0002997	0.0089	109.58	96.03	78.53	68.52	8008566	(4, 1), (4, 2)	STXBP4	ENSG00000166263	syntaxin binding protein 4 [Source:HGNC Symbol;Acc:HGNC:19694]	chr17	54968727	55173632	1	q22	36.22	protein_coding	18055
0.0062911	0.0628	105.89	134.59	100.64	186.9	8179331	(1, 4)	C2	ENSG00000166278	complement C2 [Source:HGNC Symbol;Acc:HGNC:1248]	chr6	31897785	31945672	1	p21.33	49.87	protein_coding	5517
0.0002963	0.00886	435.37	302.07	500.02	228.38	8023855	(4, 1), (4, 3)	CYB5A	ENSG00000166347	cytochrome b5 type A [Source:HGNC Symbol;Acc:HGNC:2570]	chr18	74250846	74291973	-1	q22.3	44.27	protein_coding	9271
0.0056866	0.0597	106.71	125.67	91.82	142.65	7946292	(3, 4)	CYB5R2	ENSG00000166394	cytochrome b5 reductase 2 [Source:HGNC Symbol;Acc:HGNC:24376]	chr11	7665100	7677222	-1	p15.4	49.61	protein_coding	8595
0.0007765	0.0169	47.66	63.61	52.94	82.44	7946340	(1, 4), (3, 4)	RIC3	ENSG00000166405	RIC3 acetylcholine receptor chaperone [Source:HGNC Symbol;Acc:HGNC:30338]	chr11	8106056	8169055	-1	p15.4	39.92	protein_coding	7694
0.0001066	0.00433	110.77	37.21	81.92	30.03	7988990	(2, 1), (4, 1), (4, 3)	WDR72	ENSG00000166415	WD repeat domain 72 [Source:HGNC Symbol;Acc:HGNC:26790]	chr15	53513741	53762878	-1	q21.3	36.62	protein_coding	8573
0.0021021	0.032	146.13	182.65	85.09	160.42	7991070	(3, 2), (3, 4)	HDGFL3	ENSG00000166503	HDGF like 3 [Source:HGNC Symbol;Acc:HGNC:24937]	chr15	83112738	83207823	-1	q25.2	39.55	protein_coding	16058
0.0004385	0.0115	20.52	26.86	49.65	22.86	8023401	(1, 3), (2, 3), (4, 3)	CCDC68	ENSG00000166510	coiled-coil domain containing 68 [Source:HGNC Symbol;Acc:HGNC:24350]	chr18	54901509	54959461	-1	q21.2	39.73	protein_coding	5133
9e-05	0.00384	446.71	165.5	112.95	186.1	7953765	(2, 1), (3, 1), (4, 1)	RIMKLB	ENSG00000166532	ribosomal modification protein rimK like family member B [Source:HGNC Symbol;Acc:HGNC:29228]	chr12	8681600	8783095	1	p13.31	41.05	protein_coding	8597
0.0088239	0.0764	471.76	290.12	261.05	298.49	8002592	(2, 1), (3, 1), (4, 1)	AP1G1	ENSG00000166747	adaptor related protein complex 1 subunit gamma 1 [Source:HGNC Symbol;Acc:HGNC:555]	chr16	71729000	71809201	-1	q22.2	40.73	protein_coding	10980
0.0005115	0.0127	112.53	154.41	74.03	148.66	8031646	(3, 2), (3, 4)	ZNF667-AS1	ENSG00000166770	ZNF667 antisense RNA 1 (head to head) [Source:HGNC Symbol;Acc:HGNC:44321]	chr19	56477250	56504362	1	q13.43	43.23	lncRNA	12170
0.0077875	0.0707	88.63	108.68	288.75	143.23	7991335	(1, 3), (2, 3)	ANPEP	ENSG00000166825	alanyl aminopeptidase, membrane [Source:HGNC Symbol;Acc:HGNC:500]	chr15	89784895	89815401	-1	q26.1	53.35	protein_coding	5046
0.0001389	0.00515	167.12	174.05	179.54	283.47	8068202	(1, 4), (2, 4)	EVA1C	ENSG00000166979	eva-1 homolog C [Source:HGNC Symbol;Acc:HGNC:13239]	chr21	32412006	32515397	1	q22.11	46.51	protein_coding	4353
0.0001396	0.00515	73.09	108.64	151.57	80.54	8016387	(1, 3), (4, 3)	PRR15L	ENSG00000167183	proline rich 15 like [Source:HGNC Symbol;Acc:HGNC:28149]	chr17	47951967	47957883	-1	q21.32	52	protein_coding	1524
0.0002005	0.00684	387.45	356.95	180.8	515.78	7999909	(3, 1), (3, 4)	GPRC5B	ENSG00000167191	G protein-coupled receptor class C group 5 member B [Source:HGNC Symbol;Acc:HGNC:13308]	chr16	19856691	19886167	-1	p12.3	51.08	protein_coding	6654
2.12e-05	0.00135	260.09	309.6	475.52	574.46	8026513	(1, 4), (2, 4)	TPM4	ENSG00000167460	tropomyosin 4 [Source:HGNC Symbol;Acc:HGNC:12013]	chr19	16067021	16103002	1	p13.12	50.92	protein_coding	12375
0.0061039	0.0618	948.85	925.91	784.63	1393.75	8180349	(3, 4)	TPM4	ENSG00000167460	tropomyosin 4 [Source:HGNC Symbol;Acc:HGNC:12013]	chr19	16067021	16103002	1	p13.12	50.92	protein_coding	12375
0.0087484	0.0762	998.09	581.34	489.71	620.9	8024194	(2, 1), (3, 1), (4, 1)	GPX4	ENSG00000167468	glutathione peroxidase 4 [Source:HGNC Symbol;Acc:HGNC:4556]	chr19	1103926	1106791	1	p13.3	69.47	protein_coding	2019
0.0055578	0.059	366.16	275.23	163.04	292.84	7955179	(3, 1), (3, 4)	TUBA1C	ENSG00000167553	tubulin alpha 1c [Source:HGNC Symbol;Acc:HGNC:20768]	chr12	49188736	49274600	1	q13.12	45.2	protein_coding	4454
0.0030005	0.0398	313.2	407.35	482.53	466.52	8028325	(1, 3), (1, 4)	C19orf33	ENSG00000167644	chromosome 19 open reading frame 33 [Source:HGNC Symbol;Acc:HGNC:16668]	chr19	38304164	38305006	1	q13.2	65.48	protein_coding	611
1.67e-05	0.00109	148.76	148.98	88.51	296.15	8038683	(1, 4), (2, 4), (3, 4)	KLK6	ENSG00000167755	kallikrein related peptidase 6 [Source:HGNC Symbol;Acc:HGNC:6367]	chr19	50958631	50969673	-1	q13.41	53.29	protein_coding	1976
0.0005171	0.0127	112.2	166.77	152.48	195.15	8038735	(1, 2), (1, 4)	KLK11	ENSG00000167757	kallikrein related peptidase 11 [Source:HGNC Symbol;Acc:HGNC:6359]	chr19	51022216	51028039	-1	q13.41	56.97	protein_coding	3113
0.0016046	0.0272	348.5	305.69	288.89	433.04	7941946	(2, 4), (3, 4)	NDUFV1	ENSG00000167792	NADH:ubiquinone oxidoreductase core subunit V1 [Source:HGNC Symbol;Acc:HGNC:7716]	chr11	67605653	67612554	1	q13.2	56.2	protein_coding	5057
0.0002924	0.00879	406.83	373.34	203.53	392.3	7940717	(3, 1), (3, 2), (3, 4)	SLC3A2	ENSG00000168003	solute carrier family 3 member 2 [Source:HGNC Symbol;Acc:HGNC:11026]	chr11	62856004	62888880	1	q12.3	48.31	protein_coding	6392
1.63e-05	0.00107	152.32	162.81	169.82	259.71	8145555	(1, 4), (2, 4), (3, 4)	SCARA3	ENSG00000168077	scavenger receptor class A member 3 [Source:HGNC Symbol;Acc:HGNC:19000]	chr8	27633868	27676776	1	p21.1	50.25	protein_coding	4029
1.7e-06	0.000227	205.42	83.44	151.88	75.02	8120335	(2, 1), (4, 1), (4, 3)	FAM83B	ENSG00000168143	family with sequence similarity 83 member B [Source:HGNC Symbol;Acc:HGNC:21357]	chr6	54846771	54945099	1	p12.1	35.84	protein_coding	6244
0.0001054	0.0043	344.17	150.41	157	142.65	7928308	(2, 1), (3, 1), (4, 1)	DDIT4	ENSG00000168209	DNA damage inducible transcript 4 [Source:HGNC Symbol;Acc:HGNC:24944]	chr10	72273919	72276036	1	q22.1	58.69	protein_coding	2118
0.0037522	0.046	471.62	389.65	263.64	442.2	7940857	(3, 1), (3, 4)	STIP1	ENSG00000168439	stress induced phosphoprotein 1 [Source:HGNC Symbol;Acc:HGNC:11387]	chr11	64185272	64204543	1	q13.1	50.06	protein_coding	4601
0.0010621	0.0212	445.91	289.71	486.05	268.94	7899615	(4, 1), (4, 3)	SERINC2	ENSG00000168528	serine incorporator 2 [Source:HGNC Symbol;Acc:HGNC:23231]	chr1	31409565	31434680	1	p35.2	52.8	protein_coding	3452
3e-07	5.51e-05	216.32	102.9	95.86	91.86	8098500	(2, 1), (3, 1), (4, 1)	CDKN2AIP	ENSG00000168564	CDKN2A interacting protein [Source:HGNC Symbol;Acc:HGNC:24325]	chr4	183444635	183449064	1	q35.1	41.2	protein_coding	4015
5e-07	8.16e-05	153.06	156.57	188.28	91.57	8101828	(4, 1), (4, 2), (4, 3)	TSPAN5	ENSG00000168785	tetraspanin 5 [Source:HGNC Symbol;Acc:HGNC:17753]	chr4	98470367	98658611	-1	q23	41.92	protein_coding	7412
0.0074911	0.069	212.75	121.82	130.96	147.14	8123678	(2, 1)	PXDC1	ENSG00000168994	PX domain containing 1 [Source:HGNC Symbol;Acc:HGNC:21361]	chr6	3722614	3751713	-1	p25.2	52.35	protein_coding	2161
9.5e-06	0.000763	160.17	243.45	167.41	401.76	8038695	(1, 4), (2, 4), (3, 4)	KLK7	ENSG00000169035	kallikrein related peptidase 7 [Source:HGNC Symbol;Acc:HGNC:6368]	chr19	50976468	50984099	-1	q13.41	55.8	protein_coding	2448
0.0024499	0.0355	112.04	124.58	146	158.81	7915032	(1, 4), (2, 4)	RSPO1	ENSG00000169218	R-spondin 1 [Source:HGNC Symbol;Acc:HGNC:21679]	chr1	37611350	37634892	-1	p34.3	52.57	protein_coding	3058
0.0008046	0.0173	365.88	173.84	180.18	173.48	7905929	(2, 1), (3, 1), (4, 1)	EFNA1	ENSG00000169242	ephrin A1 [Source:HGNC Symbol;Acc:HGNC:3221]	chr1	155127876	155134899	1	q22	53.76	protein_coding	2165
0.0096308	0.0798	63.45	114.28	30.72	170.33	8101126	(3, 4)	CXCL10	ENSG00000169245	C-X-C motif chemokine ligand 10 [Source:HGNC Symbol;Acc:HGNC:10637]	chr4	76021118	76023497	-1	q21.1	36.85	protein_coding	1175
0.0003947	0.0107	113.13	88.53	65.2	116.36	8091780	(3, 1), (3, 4)	B3GALNT1	ENSG00000169255	beta-1,3-N-acetylgalactosaminyltransferase 1 (globoside blood group) [Source:HGNC Symbol;Acc:HGNC:918]	chr3	161083883	161105411	-1	q26.1	40.34	protein_coding	7816
0.0013402	0.024	316.54	251.73	149.04	256.2	8091637	(3, 1), (3, 2), (3, 4)	SLC33A1	ENSG00000169359	solute carrier family 33 member 1 [Source:HGNC Symbol;Acc:HGNC:95]	chr3	155821024	155854456	-1	q25.31	39.66	protein_coding	10040
5.73e-05	0.00271	140.32	173.81	136.74	236.72	8081115	(1, 4), (2, 4), (3, 4)	ARL13B	ENSG00000169379	ADP ribosylation factor like GTPase 13B [Source:HGNC Symbol;Acc:HGNC:25419]	chr3	93980139	94055678	1	q11.1	36.2	protein_coding	6841
1.58e-05	0.00104	96.55	96.82	71.98	203.7	7905606	(1, 4), (2, 4), (3, 4)	NPR1	ENSG00000169418	natriuretic peptide receptor 1 [Source:HGNC Symbol;Acc:HGNC:7943]	chr1	153678688	153693992	1	q21.3	55.39	protein_coding	4952
2e-07	4.2e-05	40.38	42.05	65.55	26.67	8100943	(4, 1), (4, 2), (4, 3)	RASSF6	ENSG00000169435	Ras association domain family member 6 [Source:HGNC Symbol;Acc:HGNC:20796]	chr4	73571550	73620631	-1	q13.3	37.08	protein_coding	6630
0.0004464	0.0116	492.29	238.45	290.99	226.06	8147461	(2, 1), (4, 1)	SDC2	ENSG00000169439	syndecan 2 [Source:HGNC Symbol;Acc:HGNC:10659]	chr8	96493813	96611790	1	q22.1	41.32	protein_coding	4084
0.0059579	0.0611	339.58	192.88	175.2	228.84	8019392	(2, 1), (3, 1)	FASN	ENSG00000169710	fatty acid synthase [Source:HGNC Symbol;Acc:HGNC:3594]	chr17	82078338	82098294	-1	q25.3	66.65	protein_coding	9321
0.00166	0.0277	718.76	718.64	400.32	735.79	8090546	(3, 1), (3, 2), (3, 4)	CNBP	ENSG00000169714	CCHC-type zinc finger nucleic acid binding protein [Source:HGNC Symbol;Acc:HGNC:13164]	chr3	129167827	129183922	-1	q21.3	42.65	protein_coding	3584
0.0099537	0.0817	144.23	226.82	136.74	153.9	8088919	(3, 2), (4, 2)	ROBO1	ENSG00000169855	roundabout guidance receptor 1 [Source:HGNC Symbol;Acc:HGNC:10249]	chr3	78597239	79767998	-1	p12.3	35.1	protein_coding	11059
3e-07	5.51e-05	64.32	78.31	239.18	77.21	8135048	(1, 3), (2, 3), (4, 3)	MUC17	ENSG00000169876	mucin 17, cell surface associated [Source:HGNC Symbol;Acc:HGNC:16800]	chr7	101020072	101058859	1	q22.1	48.13	protein_coding	14693
0.0095381	0.0793	105.27	132.08	148.27	92.63	8166243	(4, 2), (4, 3)	REPS2	ENSG00000169891	RALBP1 associated Eps domain containing 2 [Source:HGNC Symbol;Acc:HGNC:9963]	chrX	16946658	17153272	1	p22.2	40.94	protein_coding	11336
0.0023508	0.0345	398.57	230.87	181.33	196.24	8166219	(3, 1), (4, 1)	SYAP1	ENSG00000169895	synapse associated protein 1 [Source:HGNC Symbol;Acc:HGNC:16273]	chrX	16719612	16765340	1	p22.2	43.75	protein_coding	6442
0.0002112	0.00706	43.92	59.09	147.68	51.37	8083301	(1, 3), (2, 3), (4, 3)	TM4SF4	ENSG00000169903	transmembrane 4 L six family member 4 [Source:HGNC Symbol;Acc:HGNC:11856]	chr3	149474697	149503394	1	q25.1	41.63	protein_coding	1530
0.0034483	0.0435	399.41	361.13	413.89	846.04	8091411	(2, 4)	TM4SF1	ENSG00000169908	transmembrane 4 L six family member 1 [Source:HGNC Symbol;Acc:HGNC:11853]	chr3	149369022	149377692	-1	q25.1	37.6	protein_coding	3495
0.0003085	0.00901	73.17	176.08	68.05	156.15	7930857	(1, 2), (1, 4), (3, 2), (3, 4)	EMX2	ENSG00000170370	empty spiracles homeobox 2 [Source:HGNC Symbol;Acc:HGNC:3341]	chr10	117542445	117549546	1	q26.11	56.25	protein_coding	3261
0.0019636	0.0304	125.31	338.75	160.62	151.45	8065412	(1, 2), (4, 2)	CST1	ENSG00000170373	cystatin SN [Source:HGNC Symbol;Acc:HGNC:2473]	chr20	23747562	23751268	-1	p11.21	56.78	protein_coding	861
0.0005646	0.0134	125.69	162.81	126.9	240.65	8054281	(1, 4), (3, 4)	LONRF2	ENSG00000170500	LON peptidase N-terminal domain and ring finger 2 [Source:HGNC Symbol;Acc:HGNC:24788]	chr2	100271875	100322501	-1	q11.2	41.33	protein_coding	15117
0.0005157	0.0127	85.8	186.15	82.22	244.02	8022674	(1, 4), (3, 4)	CDH2	ENSG00000170558	cadherin 2 [Source:HGNC Symbol;Acc:HGNC:1759]	chr18	27932879	28177946	-1	q12.1	37.17	protein_coding	8583
0.003359	0.0426	349.56	281.26	212.61	366.38	7964119	(3, 4)	STAT2	ENSG00000170581	signal transducer and activator of transcription 2 [Source:HGNC Symbol;Acc:HGNC:11363]	chr12	56341597	56360167	-1	q13.3	47.76	protein_coding	6198
0.0024257	0.0353	282.05	168.66	146.09	179.92	8017212	(2, 1), (3, 1), (4, 1)	USP32	ENSG00000170832	ubiquitin specific peptidase 32 [Source:HGNC Symbol;Acc:HGNC:19143]	chr17	60177327	60422470	-1	q23.2	40.15	protein_coding	9522
0.0010384	0.021	174.89	149.87	103.15	170.54	8148265	(3, 1), (3, 2), (3, 4)	RNF139	ENSG00000170881	ring finger protein 139 [Source:HGNC Symbol;Acc:HGNC:17023]	chr8	124474880	124488618	1	q24.13	38.42	protein_coding	3262
0.0095261	0.0793	69.67	57.08	52.3	42.94	7989069	(4, 1)	PYGO1	ENSG00000171016	pygopus family PHD finger 1 [Source:HGNC Symbol;Acc:HGNC:30256]	chr15	55538884	55588947	-1	q21.3	39.31	protein_coding	9005
2.55e-05	0.00152	189.94	138.9	290.15	159.64	8033362	(2, 3), (4, 3)	INSR	ENSG00000171105	insulin receptor [Source:HGNC Symbol;Acc:HGNC:6091]	chr19	7112255	7294414	-1	p13.2	47.51	protein_coding	10831
0.0088018	0.0764	298.05	264.61	189.49	377.8	8146579	(3, 4)	CHD7	ENSG00000171316	chromodomain helicase DNA binding protein 7 [Source:HGNC Symbol;Acc:HGNC:20626]	chr8	60678740	60868028	1	q12.2	39.99	protein_coding	17020
0.0010677	0.0212	119.69	69.58	119.19	75.11	8098084	(2, 1), (4, 1), (2, 3), (4, 3)	ETFDH	ENSG00000171503	electron transfer flavoprotein dehydrogenase [Source:HGNC Symbol;Acc:HGNC:3483]	chr4	158671968	158710742	1	q32.1	38.11	protein_coding	23865
1.6e-06	0.000219	111.99	216.41	122.85	474.68	7917276	(1, 4), (2, 4), (3, 4)	LPAR3	ENSG00000171517	lysophosphatidic acid receptor 3 [Source:HGNC Symbol;Acc:HGNC:14298]	chr1	84811602	84893206	-1	p22.3	41.6	protein_coding	3536
0.0058216	0.0605	500.5	458.86	276.22	324.44	8180212		TBCA	ENSG00000171530	tubulin folding cofactor A [Source:HGNC Symbol;Acc:HGNC:11579]	chr5	77691166	77868780	-1	q14.1	39.32	protein_coding	3114
0.0058381	0.0605	606.21	401.61	369.66	449.76	7912257	(2, 1), (3, 1)	CLSTN1	ENSG00000171603	calsyntenin 1 [Source:HGNC Symbol;Acc:HGNC:17447]	chr1	9728926	9823984	-1	p36.22	47.19	protein_coding	5241
9.9e-06	0.000789	518.72	566.94	366.08	763.53	8108447	(1, 4), (3, 4)	CXXC5	ENSG00000171604	CXXC finger protein 5 [Source:HGNC Symbol;Acc:HGNC:26943]	chr5	139647299	139683882	1	q31.2	58.2	protein_coding	3795
0.0063764	0.0633	164.17	118.55	154.67	113.37	7975167	(4, 1)	GPHN	ENSG00000171723	gephyrin [Source:HGNC Symbol;Acc:HGNC:15465]	chr14	66507407	67181803	1	q23.3	36.43	protein_coding	6007
< 1e-07	< 1e-07	112.17	107.89	352.63	75.09	7988414	(1, 3), (2, 3), (4, 3)	GATM	ENSG00000171766	glycine amidinotransferase [Source:HGNC Symbol;Acc:HGNC:4175]	chr15	45361124	45402327	-1	q21.1	40.25	protein_coding	9260
0.0093314	0.0781	278.39	307.84	383.72	399.95	8013450	(1, 4)	LGALS9C	ENSG00000171916	galectin 9C [Source:HGNC Symbol;Acc:HGNC:33874]	chr17	18476737	18494945	1	p11.2	52.98	protein_coding	4754
3.42e-05	0.00191	442.88	290.82	166.79	403.41	8067113	(3, 1), (3, 4)	ZNF217	ENSG00000171940	zinc finger protein 217 [Source:HGNC Symbol;Acc:HGNC:13009]	chr20	53567071	53609907	-1	q13.2	44.05	protein_coding	6175
0.0036655	0.0454	39.36	41.56	23.63	49.11	8148124	(3, 4)	MTBP	ENSG00000172167	MDM2 binding protein [Source:HGNC Symbol;Acc:HGNC:7417]	chr8	120445400	120542133	1	q24.12	35.31	protein_coding	8327
0.0028206	0.0383	192.51	275.96	260.67	414.87	8124166	(1, 4)	MBOAT1	ENSG00000172197	membrane bound O-acyltransferase domain containing 1 [Source:HGNC Symbol;Acc:HGNC:21579]	chr6	20099684	20212469	-1	p22.3	42.04	protein_coding	4325
0.0089624	0.0768	209.11	221.95	203.99	352.07	8117120		ID4	ENSG00000172201	inhibitor of DNA binding 4, HLH protein [Source:HGNC Symbol;Acc:HGNC:5363]	chr6	19837370	19842197	1	p22.3	46.71	protein_coding	3873
2.03e-05	0.00131	255.83	178.17	139.64	235.2	8063386	(2, 1), (3, 1), (2, 4), (3, 4)	CEBPB	ENSG00000172216	CCAAT enhancer binding protein beta [Source:HGNC Symbol;Acc:HGNC:1834]	chr20	50190830	50192668	1	q13.13	66.23	protein_coding	1839
0.0026449	0.037	258.56	341.6	193.52	291.18	8111974	(3, 2), (3, 4)	PAIP1	ENSG00000172239	poly(A) binding protein interacting protein 1 [Source:HGNC Symbol;Acc:HGNC:16945]	chr5	43526267	43557758	-1	p12	38.36	protein_coding	3391
0.0002498	0.00798	128.74	109.68	222.31	86.64	8097080	(2, 3), (4, 3)	SYNPO2	ENSG00000172403	synaptopodin 2 [Source:HGNC Symbol;Acc:HGNC:17732]	chr4	118850688	119061247	1	q26	38.36	protein_coding	19530
2.55e-05	0.00152	70.11	124.99	74.08	193.66	7954293	(1, 4), (3, 4)	PDE3A	ENSG00000172572	phosphodiesterase 3A [Source:HGNC Symbol;Acc:HGNC:8778]	chr12	20368537	20688583	1	p12.2	35.94	protein_coding	13308
0.0078027	0.0707	75.14	65.19	37.98	50.57	7987405	(3, 1)	RASGRP1	ENSG00000172575	RAS guanyl releasing protein 1 [Source:HGNC Symbol;Acc:HGNC:9878]	chr15	38488103	38565575	-1	q14	41.82	protein_coding	6105
0.0002563	0.00808	66.3	43.79	73.5	39.46	8121794	(4, 1), (2, 3), (4, 3)	SMPDL3A	ENSG00000172594	sphingomyelin phosphodiesterase acid like 3A [Source:HGNC Symbol;Acc:HGNC:17389]	chr6	122789049	122809720	1	q22.31	40.47	protein_coding	2349
0.0060123	0.0614	483.59	299.94	254.45	290.3	8173009	(2, 1), (3, 1), (4, 1)	PHF8	ENSG00000172943	PHD finger protein 8 [Source:HGNC Symbol;Acc:HGNC:20672]	chrX	53936676	54048958	-1	p11.22	43.07	protein_coding	9314
0.0072834	0.0681	279.72	222.15	184.91	283.06	7941769	(3, 4)	KDM2A	ENSG00000173120	lysine demethylase 2A [Source:HGNC Symbol;Acc:HGNC:13606]	chr11	67119263	67258082	1	q13.2	42.99	protein_coding	10381
< 1e-07	2.57e-05	198.27	123.43	144.09	87.33	8058390	(2, 1), (4, 1), (4, 2), (4, 3)	RAPH1	ENSG00000173166	Ras association (RalGDS/AF-6) and pleckstrin homology domains 1 [Source:HGNC Symbol;Acc:HGNC:14436]	chr2	203394345	203535335	-1	q33.2	39.14	protein_coding	11622
1e-07	2.57e-05	332.03	90.96	89.26	57.21	8113214	(2, 1), (3, 1), (4, 1)	GLRX	ENSG00000173221	glutaredoxin [Source:HGNC Symbol;Acc:HGNC:4330]	chr5	95751319	95822726	-1	q15	41.08	protein_coding	6229
< 1e-07	< 1e-07	328.1	137.6	156.85	121.45	8149264	(2, 1), (3, 1), (4, 1)	PPP1R3B	ENSG00000173281	protein phosphatase 1 regulatory subunit 3B [Source:HGNC Symbol;Acc:HGNC:14942]	chr8	9136255	9151574	-1	p23.1	46.01	protein_coding	5738
3.7e-06	0.0004	25.76	19.35	53.14	20.1	8138392	(1, 3), (2, 3), (4, 3)	AGR3	ENSG00000173467	anterior gradient 3, protein disulphide isomerase family member [Source:HGNC Symbol;Acc:HGNC:24167]	chr7	16859412	16881987	-1	p21.1	35.18	protein_coding	1153
0.0007844	0.017	417.46	186.74	139.58	189.24	8019988	(2, 1), (3, 1), (4, 1)	PTPRM	ENSG00000173482	protein tyrosine phosphatase receptor type M [Source:HGNC Symbol;Acc:HGNC:9675]	chr18	7566782	8406861	1	p11.23	40.1	protein_coding	9900
0.0070377	0.0669	279.91	222.96	207.02	189.38	8149749	(4, 1)	TNFRSF10D	ENSG00000173530	TNF receptor superfamily member 10d [Source:HGNC Symbol;Acc:HGNC:11907]	chr8	23135588	23164027	-1	p21.3	45.29	protein_coding	3535
0.0083913	0.0739	197.67	113.65	76.6	118.18	8095566	(3, 1)	MOB1B	ENSG00000173542	MOB kinase activator 1B [Source:HGNC Symbol;Acc:HGNC:29801]	chr4	70902326	71022449	1	q13.3	40.16	protein_coding	8801
6.2e-06	0.000573	537.88	188.98	131.64	197.86	8047161	(2, 1), (3, 1), (4, 1)	NABP1	ENSG00000173559	nucleic acid binding protein 1 [Source:HGNC Symbol;Acc:HGNC:26232]	chr2	191678068	191741097	1	q32.3	38.45	protein_coding	17426
0.0001646	0.00594	1206.23	1054.43	1132.38	670.73	7919193	(4, 1), (4, 2), (4, 3)	NUDT4	ENSG00000173598	nudix hydrolase 4 [Source:HGNC Symbol;Acc:HGNC:8051]	chr12	93377883	93408146	1	q22	41.97	protein_coding	10078
0.0004851	0.0123	50.63	178.53	59.63	132.6	8171624	(1, 2), (1, 4), (3, 2)	ADGRG2	ENSG00000173698	adhesion G protein-coupled receptor G2 [Source:HGNC Symbol;Acc:HGNC:4516]	chrX	18989307	19122637	-1	p22.13	42.96	protein_coding	10157
0.0002289	0.00747	85.26	63.05	62.3	34.48	8083839	(4, 1), (4, 2)	GPR160	ENSG00000173890	G protein-coupled receptor 160 [Source:HGNC Symbol;Acc:HGNC:23693]	chr3	170037995	170085392	1	q26.2	42.34	protein_coding	4381
0.0023087	0.0341	129.08	140.16	112.26	187.04	7949679	(3, 4)	SPTBN2	ENSG00000173898	spectrin beta, non-erythrocytic 2 [Source:HGNC Symbol;Acc:HGNC:11276]	chr11	66682497	66744670	-1	q13.2	52.41	protein_coding	12609
0.0065384	0.0643	582.07	613.69	383.58	643.09	8090893	(3, 2), (3, 4)	MSL2	ENSG00000174579	MSL complex subunit 2 [Source:HGNC Symbol;Acc:HGNC:25544]	chr3	136148917	136197241	-1	q22.3	42.35	protein_coding	5411
0.0028538	0.0386	67.61	121.07	151.14	96.34	8097017	(1, 2), (1, 3)	UGT8	ENSG00000174607	UDP glycosyltransferase 8 [Source:HGNC Symbol;Acc:HGNC:12555]	chr4	114598770	114678225	1	q26	36.06	protein_coding	4385
0.0024987	0.0358	116.55	151.17	137.07	208.11	7950885	(1, 4)	FZD4	ENSG00000174804	frizzled class receptor 4 [Source:HGNC Symbol;Acc:HGNC:4042]	chr11	86945679	86955395	-1	q14.2	45.44	protein_coding	7387
0.009156	0.0773	185.26	165.58	95.06	154.26	8091562	(3, 1), (3, 2), (3, 4)	DHX36	ENSG00000174953	DEAH-box helicase 36 [Source:HGNC Symbol;Acc:HGNC:14410]	chr3	154272546	154324487	-1	q25.2	35.49	protein_coding	10552
0.0072123	0.0677	469.4	276.55	287.67	316	7947681	(2, 1), (4, 1)	ARHGAP1	ENSG00000175220	Rho GTPase activating protein 1 [Source:HGNC Symbol;Acc:HGNC:673]	chr11	46677080	46700619	-1	p11.2	53.08	protein_coding	6142
1.44e-05	0.00098	88.88	99.32	193.85	89.88	7993815	(1, 3), (2, 3), (4, 3)	ANKS4B	ENSG00000175311	ankyrin repeat and sterile alpha motif domain containing 4B [Source:HGNC Symbol;Acc:HGNC:26795]	chr16	21233699	21253850	1	p12.2	42.41	protein_coding	4323
0.0010258	0.0208	436.69	483.45	336.93	541.22	8180260	(3, 2), (3, 4)	BANF1	ENSG00000175334	BAF nuclear assembly factor 1 [Source:HGNC Symbol;Acc:HGNC:17397]	chr11	66002228	66004149	1	q13.1	57.86	protein_coding	1496
0.0013616	0.0243	226.35	214.94	148.61	252.23	8090448	(3, 4)	RUVBL1	ENSG00000175792	RuvB like AAA ATPase 1 [Source:HGNC Symbol;Acc:HGNC:10474]	chr3	128064778	128153914	-1	q21.3	45.86	protein_coding	6998
0.0016096	0.0272	410.68	302.78	332.95	233.52	7899265	(4, 1)	SFN	ENSG00000175793	stratifin [Source:HGNC Symbol;Acc:HGNC:10773]	chr1	26863149	26864456	1	p36.11	62.77	protein_coding	1308
0.0035992	0.0447	347.45	296.68	199.92	292.95	8089759	(3, 1), (3, 2), (3, 4)	TMEM39A	ENSG00000176142	transmembrane protein 39A [Source:HGNC Symbol;Acc:HGNC:25600]	chr3	119428949	119468830	-1	q13.33	39.07	protein_coding	5867
0.000517	0.0127	171.36	117.36	86.52	97.12	8014037	(3, 1), (4, 1)	CRLF3	ENSG00000176390	cytokine receptor like factor 3 [Source:HGNC Symbol;Acc:HGNC:17177]	chr17	30769388	30824692	-1	q11.2	42.4	protein_coding	4388
0.0010654	0.0212	70.24	79.64	111.63	126.37	8023598	(1, 4), (2, 4)	RNF152	ENSG00000176641	ring finger protein 152 [Source:HGNC Symbol;Acc:HGNC:26811]	chr18	61808067	61894247	-1	q21.33	42.43	protein_coding	10213
0.0016499	0.0277	191.48	173.28	306.85	166.53	8014115	(2, 3), (4, 3)	MYO1D	ENSG00000176658	myosin ID [Source:HGNC Symbol;Acc:HGNC:7598]	chr17	32492522	32877177	-1	q11.2	40.83	protein_coding	8188
0.0024434	0.0355	433.22	329.23	196.3	400.44	8148208	(3, 1), (3, 4)	FAM91A1	ENSG00000176853	family with sequence similarity 91 member A1 [Source:HGNC Symbol;Acc:HGNC:26306]	chr8	123768439	123815452	1	q24.13	36.92	protein_coding	7263
0.0039264	0.0473	97.58	83.93	113.89	74.67	8030094	(4, 3)	FUT2	ENSG00000176920	fucosyltransferase 2 [Source:HGNC Symbol;Acc:HGNC:4013]	chr19	48695971	48705951	1	q13.33	51.56	protein_coding	3381
0.0002189	0.00721	55.42	36.14	56.95	31.55	8112668	(4, 1), (4, 3)	GCNT4	ENSG00000176928	glucosaminyl (N-acetyl) transferase 4 [Source:HGNC Symbol;Acc:HGNC:17973]	chr5	75025346	75052558	-1	q13.3	41.8	protein_coding	5884
0.0083323	0.0737	189.28	241.23	159.94	277.5	7938816	(3, 4)	ZDHHC13	ENSG00000177054	zinc finger DHHC-type palmitoyltransferase 13 [Source:HGNC Symbol;Acc:HGNC:18413]	chr11	19117099	19176422	1	p15.1	37.99	protein_coding	7759
0.0024897	0.0358	111.27	133.36	125.84	174	8089467	(1, 4)	ZBED2	ENSG00000177494	zinc finger BED-type containing 2 [Source:HGNC Symbol;Acc:HGNC:20710]	chr3	111592900	111595346	-1	q13.13	47.49	protein_coding	2214
0.0001378	0.00515	942.79	746.7	362.61	811.95	8092201	(3, 1), (3, 2), (3, 4)	TBL1XR1	ENSG00000177565	TBL1X receptor 1 [Source:HGNC Symbol;Acc:HGNC:29529]	chr3	177019340	177228000	-1	q26.32	39.31	protein_coding	11689
0.001162	0.0222	283.51	201.6	173.68	269.65	8082444	(3, 1), (2, 4), (3, 4)	ACAD9	ENSG00000177646	acyl-CoA dehydrogenase family member 9 [Source:HGNC Symbol;Acc:HGNC:21497]	chr3	128879596	128924003	1	q21.3	48.09	protein_coding	11841
0.0020125	0.0309	84.02	63.3	37.47	81.07	8083616	(3, 1), (3, 4)	MLF1	ENSG00000178053	myeloid leukemia factor 1 [Source:HGNC Symbol;Acc:HGNC:7125]	chr3	158571163	158607252	1	q25.32	37.51	protein_coding	3735
0.008744	0.0762	368.62	235.49	315.06	347.13	8153568	(2, 1), (2, 4)	PLEC	ENSG00000178209	plectin [Source:HGNC Symbol;Acc:HGNC:9069]	chr8	143915153	143976734	-1	q24.3	63.62	protein_coding	16992
0.000493	0.0125	434.86	235.07	205.03	233.76	8137448	(2, 1), (3, 1), (4, 1)	GALNT11	ENSG00000178234	polypeptide N-acetylgalactosaminyltransferase 11 [Source:HGNC Symbol;Acc:HGNC:19875]	chr7	152025674	152122340	1	q36.1	41.23	protein_coding	8288
0.0002349	0.00759	59.71	32.96	34.15	32.74	8007949	(2, 1), (3, 1), (4, 1)	EFCAB13	ENSG00000178852	EF-hand calcium binding domain 13 [Source:HGNC Symbol;Acc:HGNC:26864]	chr17	47323290	47441312	1	q21.32	37.82	protein_coding	6678
0.0093196	0.078	386.18	333.06	543.27	339.02	8029969	(2, 3), (4, 3)	SELENOW	ENSG00000178980	selenoprotein W [Source:HGNC Symbol;Acc:HGNC:10752]	chr19	47778585	47784686	1	q13.33	54.38	protein_coding	5248
0.0030668	0.0405	448.7	428.58	321.62	535.77	8153536	(3, 4)	PUF60	ENSG00000179950	poly(U) binding splicing factor 60 [Source:HGNC Symbol;Acc:HGNC:17042]	chr8	143816344	143829352	-1	q24.3	61.8	protein_coding	4917
0.0060436	0.0616	56.75	75.88	102.2	72.82	8044067	(1, 3)	SLC9A4	ENSG00000180251	solute carrier family 9 member A4 [Source:HGNC Symbol;Acc:HGNC:11077]	chr2	102473226	102533972	1	q12.1	40.97	protein_coding	4555
7.67e-05	0.00336	150.37	112.4	138.9	85.95	7965541	(4, 1), (4, 3)	FGD6	ENSG00000180263	FYVE, RhoGEF and PH domain containing 6 [Source:HGNC Symbol;Acc:HGNC:21740]	chr12	95076749	95217482	-1	q22	41.01	protein_coding	10044
0.0038619	0.0468	75.04	48.98	50.77	47.19	8096411	(2, 1), (4, 1)	TIGD2	ENSG00000180346	tigger transposable element derived 2 [Source:HGNC Symbol;Acc:HGNC:18333]	chr4	89111533	89114901	1	q22.1	42.86	protein_coding	3186
4e-07	6.97e-05	216.37	281.15	163.26	883.64	8033674	(1, 4), (2, 4), (3, 4)	MUC16	ENSG00000181143	mucin 16, cell surface associated [Source:HGNC Symbol;Acc:HGNC:15582]	chr19	8848844	8981342	-1	p13.2	45.91	protein_coding	43830
6e-06	0.000566	365.21	214.13	165.93	223.55	8083457	(2, 1), (3, 1), (4, 1)	RAP2B	ENSG00000181467	RAP2B, member of RAS oncogene family [Source:HGNC Symbol;Acc:HGNC:9862]	chr3	153162226	153170627	1	q25.2	41.26	protein_coding	8402
0.0011245	0.022	176.66	188.65	227.91	274.78	8087485	(1, 4), (2, 4)	UBA7	ENSG00000182179	ubiquitin like modifier activating enzyme 7 [Source:HGNC Symbol;Acc:HGNC:12471]	chr3	49805209	49813953	-1	p21.31	58.1	protein_coding	4550
3.94e-05	0.00209	186.85	175.99	96.11	252.44	8175539	(3, 1), (3, 2), (3, 4)	LDOC1	ENSG00000182195	LDOC1 regulator of NFKB signaling [Source:HGNC Symbol;Acc:HGNC:6548]	chrX	141111605	141177129	-1	q27.1	38.91	protein_coding	4983
0.0027998	0.0382	719.36	506.75	296.34	454.55	8166805	(3, 1)	ATP6AP2	ENSG00000182220	ATPase H+ transporting accessory protein 2 [Source:HGNC Symbol;Acc:HGNC:18305]	chrX	40579372	40606848	1	p11.4	41.77	protein_coding	9541
0.0003994	0.0108	233.67	168.21	118	216.3	8078252	(3, 1), (3, 4)	UBE2E2	ENSG00000182247	ubiquitin conjugating enzyme E2 E2 [Source:HGNC Symbol;Acc:HGNC:12478]	chr3	23203020	23591794	1	p24.3	37.68	protein_coding	3241
0.001407	0.0248	567.8	337.39	280.6	375.67	8019211	(2, 1), (3, 1), (4, 1)	NPLOC4	ENSG00000182446	NPL4 homolog, ubiquitin recognition factor [Source:HGNC Symbol;Acc:HGNC:18261]	chr17	81556887	81648465	-1	q25.3	50.06	protein_coding	9540
0.0080098	0.0719	164.47	174.22	76.31	138.13	8060854	(3, 1), (3, 2), (3, 4)	PLCB1	ENSG00000182621	phospholipase C beta 1 [Source:HGNC Symbol;Acc:HGNC:15917]	chr20	8077251	8968360	1	p12.3	38.19	protein_coding	17412
0.0053188	0.0571	94.74	98.53	153.81	100.18	7923958	(1, 3), (2, 3), (4, 3)	C1orf116	ENSG00000182795	chromosome 1 open reading frame 116 [Source:HGNC Symbol;Acc:HGNC:28667]	chr1	207018522	207032756	-1	q32.1	47.45	protein_coding	5501
0.0019375	0.0302	384.68	361.2	284.3	586.52	7977397	(2, 4), (3, 4)	CRIP2	ENSG00000182809	cysteine rich protein 2 [Source:HGNC Symbol;Acc:HGNC:2361]	chr14	105472962	105480162	1	q32.33	69.59	protein_coding	4165
0.0011111	0.0218	2285.47	2826.24	1446.52	2404.9	8085026	(3, 2), (3, 4)	RPL35A	ENSG00000182899	ribosomal protein L35a [Source:HGNC Symbol;Acc:HGNC:10345]	chr3	197950190	197956610	1	q29	44.87	protein_coding	2899
0.0019316	0.0302	108.75	167.21	86.83	129.44	7951807	(3, 2)	CADM1	ENSG00000182985	cell adhesion molecule 1 [Source:HGNC Symbol;Acc:HGNC:5951]	chr11	115169218	115504957	-1	q23.3	38.54	protein_coding	10975
5e-07	8.16e-05	422.54	118.81	108.57	118.41	8051762	(2, 1), (3, 1), (4, 1)	SLC8A1	ENSG00000183023	solute carrier family 8 member A1 [Source:HGNC Symbol;Acc:HGNC:11068]	chr2	40097270	40611053	-1	p22.1	37.43	protein_coding	21922
5.8e-06	0.000552	147.06	156.68	182.97	318.98	7970329	(1, 4), (2, 4)	GAS6	ENSG00000183087	growth arrest specific 6 [Source:HGNC Symbol;Acc:HGNC:4168]	chr13	113820549	113864076	-1	q34	57.6	protein_coding	6015
< 1e-07	2.57e-05	64.62	96.46	67.84	158.07	7939131	(1, 4), (2, 4), (3, 4)	WT1-AS	ENSG00000183242	WT1 antisense RNA [Source:HGNC Symbol;Acc:HGNC:18135]	chr11	32435518	32458769	1	p13	44.72	lncRNA	5561
0.0027309	0.0376	1150.59	643.39	634.35	931.64	8070819	(2, 1), (3, 1), (2, 4)	PTTG1IP	ENSG00000183255	PTTG1 interacting protein [Source:HGNC Symbol;Acc:HGNC:13524]	chr21	44849585	44873903	-1	q22.3	51	protein_coding	3537
0.0090408	0.0769	222.16	199.96	127.27	220.41	8148658	(3, 1), (3, 4)	ZNF623	ENSG00000183309	zinc finger protein 623 [Source:HGNC Symbol;Acc:HGNC:29084]	chr8	143636019	143656418	1	q24.3	47.93	protein_coding	7140
0.0033297	0.0424	112.05	173.87	101.14	222.07	8068697	(1, 4), (3, 4)	MX2	ENSG00000183486	MX dynamin like GTPase 2 [Source:HGNC Symbol;Acc:HGNC:7533]	chr21	41361999	41409393	1	q22.3	49.7	protein_coding	14562
< 1e-07	< 1e-07	42.07	43.07	105.73	49.95	8068633	(1, 3), (2, 3), (4, 3)	B3GALT5	ENSG00000183778	beta-1,3-galactosyltransferase 5 [Source:HGNC Symbol;Acc:HGNC:920]	chr21	39556442	39673137	1	q22.2	44.29	protein_coding	14602
0.0012416	0.0231	181.3	174.71	110.41	193.72	8151788	(3, 1), (3, 2), (3, 4)	RBM12B	ENSG00000183808	RNA binding motif protein 12B [Source:HGNC Symbol;Acc:HGNC:32310]	chr8	93728155	93741017	-1	q22.1	38.14	protein_coding	8819
0.0002092	0.00703	53.83	74.28	130.08	99.69	8068684	(1, 3), (1, 4), (2, 3)	FAM3B	ENSG00000183844	FAM3 metabolism regulating signaling molecule B [Source:HGNC Symbol;Acc:HGNC:1253]	chr21	41304212	41357727	1	q22.3	44.37	protein_coding	3828
< 1e-07	2.57e-05	82.16	72.78	185.67	64.46	8070467	(1, 3), (2, 3), (4, 3)	TMPRSS2	ENSG00000184012	transmembrane serine protease 2 [Source:HGNC Symbol;Acc:HGNC:11876]	chr21	41464300	41531116	-1	q22.3	49.1	protein_coding	6589
0.001914	0.0301	136.81	180.32	109.59	178.22	8081241	(3, 2), (3, 4)	CMSS1	ENSG00000184220	cms1 ribosomal small subunit homolog [Source:HGNC Symbol;Acc:HGNC:28666]	chr3	99817837	100181732	1	q12.1	38.77	protein_coding	7207
0.0022619	0.0338	138.12	158.76	120.37	208.15	7951133	(3, 4)	MAML2	ENSG00000184384	mastermind like transcriptional coactivator 2 [Source:HGNC Symbol;Acc:HGNC:16259]	chr11	95976598	96343195	-1	q21	40.05	protein_coding	7124
5.58e-05	0.00267	256.47	260.94	168.53	345.11	8148501	(3, 4)	PTP4A3	ENSG00000184489	protein tyrosine phosphatase 4A3 [Source:HGNC Symbol;Acc:HGNC:9636]	chr8	141391995	141432454	1	q24.3	62.4	protein_coding	3692
0.0074033	0.0685	200.62	126.35	122.61	156.57	8018864	(2, 1), (3, 1)	SOCS3	ENSG00000184557	suppressor of cytokine signaling 3 [Source:HGNC Symbol;Acc:HGNC:19391]	chr17	78356778	78360077	-1	q25.3	62.24	protein_coding	2734
< 1e-07	< 1e-07	130.05	250.26	160.32	667.8	7947363	(1, 4), (2, 4), (3, 4)	WT1	ENSG00000184937	WT1 transcription factor [Source:HGNC Symbol;Acc:HGNC:12796]	chr11	32387775	32435564	-1	p13	46.42	protein_coding	8133
0.006195	0.0622	61.14	103.93	113.42	72.83	8081001	(1, 2)	ROBO2	ENSG00000185008	roundabout guidance receptor 2 [Source:HGNC Symbol;Acc:HGNC:10250]	chr3	75906695	77649964	1	p12.3	35.65	protein_coding	16663
0.0003514	0.00987	441.95	376.65	283.77	537.45	7937330	(2, 4), (3, 4)	IFITM2	ENSG00000185201	interferon induced transmembrane protein 2 [Source:HGNC Symbol;Acc:HGNC:5413]	chr11	303655	309397	1	p15.5	55.22	protein_coding	1507
4.68e-05	0.00238	567.85	231.18	164.39	410.29	7977046	(2, 1), (3, 1), (2, 4), (3, 4)	TNFAIP2	ENSG00000185215	TNF alpha induced protein 2 [Source:HGNC Symbol;Acc:HGNC:11895]	chr14	103121476	103137439	1	q32.32	61.66	protein_coding	5058
9.93e-05	0.00417	59.74	52.25	65.07	40.05	8112033	(4, 1), (4, 2), (4, 3)	ARL15	ENSG00000185305	ADP ribosylation factor like GTPase 15 [Source:HGNC Symbol;Acc:HGNC:25945]	chr5	53883942	54310582	-1	q11.2	38.5	protein_coding	3800
2.29e-05	0.00141	430.81	247.92	344.2	254.55	7986329	(2, 1), (4, 1)	NR2F2	ENSG00000185551	nuclear receptor subfamily 2 group F member 2 [Source:HGNC Symbol;Acc:HGNC:7976]	chr15	96325938	96340263	1	q26.2	48.74	protein_coding	6476
0.0001304	0.00501	141.19	112.49	107.52	252.76	7981514	(2, 4), (3, 4)	AHNAK2	ENSG00000185567	AHNAK nucleoprotein 2 [Source:HGNC Symbol;Acc:HGNC:20125]	chr14	104937244	104978374	-1	q32.33	57.29	protein_coding	18788
0.0006776	0.0154	259.59	386.66	311.53	519.93	7906954	(1, 4)	PBX1	ENSG00000185630	PBX homeobox 1 [Source:HGNC Symbol;Acc:HGNC:8632]	chr1	164555584	164899296	1	q23.3	41.67	protein_coding	21370
0.0005823	0.0137	772.79	548.3	398.4	594.62	7979813	(3, 1), (3, 4)	ZFP36L1	ENSG00000185650	ZFP36 ring finger protein like 1 [Source:HGNC Symbol;Acc:HGNC:1107]	chr14	68787660	68796253	-1	q24.1	53.26	protein_coding	5160
0.005734	0.0598	161.61	147.34	98.87	117.36	8072488	(3, 1)	DRG1	ENSG00000185721	developmentally regulated GTP binding protein 1 [Source:HGNC Symbol;Acc:HGNC:3029]	chr22	31399604	31530634	1	q12.2	44.4	protein_coding	2198
0.0085385	0.0748	35.69	45.09	21.02	35.4	7910030	(3, 2), (3, 4)	DNAH14	ENSG00000185842	dynein axonemal heavy chain 14 [Source:HGNC Symbol;Acc:HGNC:2945]	chr1	224896262	225399292	1	q42.12	37.4	protein_coding	19693
1.45e-05	0.000981	413.61	638.71	143.68	917.82	7937335	(3, 2), (3, 4)	IFITM1	ENSG00000185885	interferon induced transmembrane protein 1 [Source:HGNC Symbol;Acc:HGNC:5412]	chr11	310041	315272	1	p15.5	58.01	protein_coding	1666
0.0045302	0.0516	119.43	159.44	243.59	126.37	8162533	(1, 3), (4, 3)	PTCH1	ENSG00000185920	patched 1 [Source:HGNC Symbol;Acc:HGNC:9585]	chr9	95442980	95517057	-1	q22.32	47.49	protein_coding	17196
0.0031878	0.0412	221.73	173.21	109.55	186.21	8091764	(3, 1), (3, 4)	KPNA4	ENSG00000186432	karyopherin subunit alpha 4 [Source:HGNC Symbol;Acc:HGNC:6397]	chr3	160495007	160565571	-1	q25.33	37.19	protein_coding	13643
0.0011555	0.0221	41.57	74.7	83.95	48.75	8105596	(1, 2), (1, 3), (4, 2), (4, 3)	RGS7BP	ENSG00000186479	regulator of G protein signaling 7 binding protein [Source:HGNC Symbol;Acc:HGNC:23271]	chr5	64506015	64612319	1	q12.3	39.06	protein_coding	4628
0.005194	0.0564	937.57	708.34	546.91	921.74	8142886	(3, 1), (3, 4)	UBE2H	ENSG00000186591	ubiquitin conjugating enzyme E2 H [Source:HGNC Symbol;Acc:HGNC:12484]	chr7	129830732	129952960	-1	q32.2	41.85	protein_coding	6514
0.0049087	0.0545	654.73	859.92	441.42	713.05	7965048	(3, 2), (3, 4)	NAP1L1	ENSG00000187109	nucleosome assembly protein 1 like 1 [Source:HGNC Symbol;Acc:HGNC:7637]	chr12	76036585	76084735	-1	q21.2	37.01	protein_coding	17059
6.16e-05	0.00287	427.84	252.87	192.24	176.27	8057394	(3, 1), (4, 1)	SESTD1	ENSG00000187231	SEC14 and spectrin domain containing 1 [Source:HGNC Symbol;Acc:HGNC:18379]	chr2	179101678	179264832	-1	q31.2	36.91	protein_coding	11405
0.0027578	0.0379	311.88	196.15	134.18	213.2	8164607	(3, 1)	FNBP1	ENSG00000187239	formin binding protein 1 [Source:HGNC Symbol;Acc:HGNC:17069]	chr9	129887187	130043194	-1	q34.11	43.76	protein_coding	6600
1e-07	2.57e-05	264.98	299.66	134.67	596.65	8029489	(1, 4), (3, 2), (2, 4), (3, 4)	BCAM	ENSG00000187244	basal cell adhesion molecule (Lutheran blood group) [Source:HGNC Symbol;Acc:HGNC:6722]	chr19	44809071	44821421	1	q13.32	58.92	protein_coding	4997
0.0003267	0.00925	543.89	246.22	234.32	244.2	7972750	(2, 1), (3, 1), (4, 1)	COL4A1	ENSG00000187498	collagen type IV alpha 1 chain [Source:HGNC Symbol;Acc:HGNC:2202]	chr13	110148963	110307157	-1	q34	44.9	protein_coding	14662
0.0005521	0.0131	1146.82	846.26	633.43	673.92	8054676	(3, 1), (4, 1)	RGPD1	ENSG00000187627	RANBP2 like and GRIP domain containing 1 [Source:HGNC Symbol;Acc:HGNC:32414]	chr2	86907953	87013976	1	p11.2	40.42	protein_coding	7285
0.0025882	0.0366	754.92	640.36	488.39	513.14	8054414	(3, 1), (4, 1)	RGPD1	ENSG00000187627	RANBP2 like and GRIP domain containing 1 [Source:HGNC Symbol;Acc:HGNC:32414]	chr2	86907953	87013976	1	p11.2	40.42	protein_coding	7285
0.0060306	0.0615	226.88	169.44	130.93	119.88	8054532	(4, 1)	RGPD1	ENSG00000187627	RANBP2 like and GRIP domain containing 1 [Source:HGNC Symbol;Acc:HGNC:32414]	chr2	86907953	87013976	1	p11.2	40.42	protein_coding	7285
9e-06	0.000734	125.24	186.32	138.59	380.93	7984588	(1, 4), (2, 4), (3, 4)	THSD4	ENSG00000187720	thrombospondin type 1 domain containing 4 [Source:HGNC Symbol;Acc:HGNC:25835]	chr15	71096952	71783383	1	q23	42.5	protein_coding	15837
0.0060099	0.0614	181.6	119.51	99.6	153.24	8153819	(3, 1)	CYHR1	ENSG00000187954	cysteine and histidine rich 1 [Source:HGNC Symbol;Acc:HGNC:17806]	chr8	144449582	144465667	-1	q24.3	61.95	protein_coding	9787
7.7e-06	0.00066	222.46	231.63	150.94	361.24	8059854	(1, 4), (2, 4), (3, 4)	ARL4C	ENSG00000188042	ADP ribosylation factor like GTPase 4C [Source:HGNC Symbol;Acc:HGNC:698]	chr2	234493041	234497081	-1	q37.1	50.41	protein_coding	4041
0.0039974	0.0477	393.4	300.29	248.1	388.22	7896822	(3, 1), (3, 4)	AGRN	ENSG00000188157	agrin [Source:HGNC Symbol;Acc:HGNC:329]	chr1	1020120	1056118	1	p36.33	65.71	protein_coding	10761
0.0064213	0.0635	422.01	288.84	385.74	265.79	8065280	(4, 1)	RALGAPA2	ENSG00000188559	Ral GTPase activating protein catalytic subunit alpha 2 [Source:HGNC Symbol;Acc:HGNC:16207]	chr20	20389530	20712644	-1	p11.23	40.43	protein_coding	11649
0.0094926	0.0791	57.99	57.49	99.51	54.18	7918694	(2, 3), (4, 3)	BCL2L15	ENSG00000188761	BCL2 like 15 [Source:HGNC Symbol;Acc:HGNC:33624]	chr1	113876816	113887581	-1	p13.2	41.52	protein_coding	9095
0.003402	0.043	32.13	34.1	73.88	30.05	8180400	(1, 3), (2, 3), (4, 3)	BCL2L15	ENSG00000188761	BCL2 like 15 [Source:HGNC Symbol;Acc:HGNC:33624]	chr1	113876816	113887581	-1	p13.2	41.52	protein_coding	9095
7e-07	0.000106	23.44	36.22	81.93	27.48	8163181	(1, 3), (2, 3), (4, 3)	C9orf152	ENSG00000188959	chromosome 9 open reading frame 152 [Source:HGNC Symbol;Acc:HGNC:31455]	chr9	110190048	110208159	-1	q31.3	47.51	protein_coding	2917
0.0004306	0.0113	229.14	134.58	115.58	113.79	8017162	(2, 1), (3, 1), (4, 1)	RNFT1	ENSG00000189050	ring finger protein, transmembrane 1 [Source:HGNC Symbol;Acc:HGNC:30206]	chr17	59952240	59964761	-1	q23.1	38.09	protein_coding	3399
2.62e-05	0.00152	736.96	319.14	327.08	382	7999468	(2, 1), (3, 1), (4, 1)	LITAF	ENSG00000189067	lipopolysaccharide induced TNF factor [Source:HGNC Symbol;Acc:HGNC:16841]	chr16	11547722	11636381	-1	p13.13	49.14	protein_coding	5058
< 1e-07	2.57e-05	130.35	94.51	178.28	57.83	8166925	(4, 1), (2, 3), (4, 2), (4, 3)	MAOA	ENSG00000189221	monoamine oxidase A [Source:HGNC Symbol;Acc:HGNC:6833]	chrX	43654907	43746824	1	p11.3	40.27	protein_coding	5528
5e-07	8.16e-05	149.02	134.34	121.44	285.36	8084794	(1, 4), (2, 4), (3, 4)	IL1RAP	ENSG00000196083	interleukin 1 receptor accessory protein [Source:HGNC Symbol;Acc:HGNC:5995]	chr3	190514051	190659750	1	q28	37.94	protein_coding	11558
0.0022932	0.0341	188.73	122.62	208.27	79.06	7925929	(4, 1), (4, 3)	AKR1C3	ENSG00000196139	aldo-keto reductase family 1 member C3 [Source:HGNC Symbol;Acc:HGNC:386]	chr10	5035354	5107686	1	p15.1	40.4	protein_coding	3911
0.0062034	0.0622	156.79	170.08	124.42	193.09	8153920	(3, 4)	ZNF250	ENSG00000196150	zinc finger protein 250 [Source:HGNC Symbol;Acc:HGNC:13044]	chr8	144876497	144902168	-1	q24.3	47.13	protein_coding	7357
0.0039524	0.0475	543.76	324.74	454.86	330.99	7924636	(2, 1), (4, 1)	TMEM63A	ENSG00000196187	transmembrane protein 63A [Source:HGNC Symbol;Acc:HGNC:29118]	chr1	225845536	225882380	-1	q42.12	51.62	protein_coding	10350
0.000268	0.00829	126.31	142.44	127.59	201.21	8085164	(1, 4), (2, 4), (3, 4)	SRGAP3	ENSG00000196220	SLIT-ROBO Rho GTPase activating protein 3 [Source:HGNC Symbol;Acc:HGNC:19744]	chr3	8980591	9363053	-1	p25.3	45.29	protein_coding	18924
0.002643	0.037	131.67	87.94	111.72	80.37	8179709	(4, 1)	SFTA2	ENSG00000196260	surfactant associated 2 [Source:HGNC Symbol;Acc:HGNC:18386]	chr6	30931353	30955636	-1	p21.33	50.01	protein_coding	1199
0.0028041	0.0382	216.47	132.7	163.07	145.99	8033002	(2, 1), (4, 1)	LONP1	ENSG00000196365	lon peptidase 1, mitochondrial [Source:HGNC Symbol;Acc:HGNC:9479]	chr19	5691834	5720572	-1	p13.3	57.82	protein_coding	5032
0.0002418	0.00777	281.84	200.51	295.99	150.16	8066822	(4, 1), (4, 3)	SULF2	ENSG00000196562	sulfatase 2 [Source:HGNC Symbol;Acc:HGNC:20392]	chr20	47656348	47786616	-1	q13.12	50.48	protein_coding	6657
0.0025389	0.036	798.35	415.21	380.19	463.41	8076998	(2, 1), (3, 1), (4, 1)	PLXNB2	ENSG00000196576	plexin B2 [Source:HGNC Symbol;Acc:HGNC:9104]	chr22	50274979	50307646	-1	q13.33	64.97	protein_coding	7271
0.0048197	0.0538	349.17	244.87	426.57	216	8120783	(4, 3)	MYO6	ENSG00000196586	myosin VI [Source:HGNC Symbol;Acc:HGNC:7605]	chr6	75749192	75919537	1	q14.1	37.66	protein_coding	10727
0.0019768	0.0306	419.33	286.28	500.68	284.6	8002322	(2, 3), (4, 3)	PDXDC2P-NPIPB14P	ENSG00000196696	nuclear pore complex-interacting protein [Source:NCBI gene (formerly Entrezgene);Acc:283970]	chr16	69976297	70065948	-1	q22.1	44.73	lncRNA	6223
3.6e-06	0.0004	808.09	263.99	575.65	289.22	8156199	(2, 1), (4, 1), (2, 3), (4, 3)	DAPK1	ENSG00000196730	death associated protein kinase 1 [Source:HGNC Symbol;Acc:HGNC:2674]	chr9	87497228	87708634	1	q21.33	45.13	protein_coding	8908
3.1e-06	0.000371	956.33	1190.2	485.53	1544.66	8089299	(3, 1), (3, 2), (3, 4)	CD47	ENSG00000196776	CD47 molecule [Source:HGNC Symbol;Acc:HGNC:1682]	chr3	108043091	108091862	-1	q13.12	37.38	protein_coding	8234
0.0091854	0.0774	45.77	57.44	50.15	67.68	7967325	(1, 4)	HCAR1	ENSG00000196917	hydroxycarboxylic acid receptor 1 [Source:HGNC Symbol;Acc:HGNC:4532]	chr12	122726076	122730844	-1	q24.31	48.94	protein_coding	4769
0.004227	0.0494	94.01	106.62	61.56	124.86	8153935	(3, 4)	ZNF252P	ENSG00000196922	zinc finger protein 252, pseudogene [Source:HGNC Symbol;Acc:HGNC:13046]	chr8	144973589	145002895	-1	q24.3	41.65	transcribed_unprocessed_pseudogene	9148
0.00251	0.0358	250.28	205.35	99.93	231.09	8047174	(3, 1), (3, 2), (3, 4)	SLC39A10	ENSG00000196950	solute carrier family 39 member 10 [Source:HGNC Symbol;Acc:HGNC:20861]	chr2	195575977	195737702	1	q32.3	38.48	protein_coding	6917
1.1e-06	0.000159	1069.56	304.38	697.33	244.6	8042468	(2, 1), (4, 1), (4, 3)	ANXA4	ENSG00000196975	annexin A4 [Source:HGNC Symbol;Acc:HGNC:542]	chr2	69644425	69827112	1	p13.3	41.93	protein_coding	11060
0.004743	0.0534	459.64	354.97	380.3	305.04	8123181	(4, 1)	IGF2R	ENSG00000197081	insulin like growth factor 2 receptor [Source:HGNC Symbol;Acc:HGNC:5467]	chr6	159969082	160113507	1	q25.3	45.56	protein_coding	22613
0.0008015	0.0173	34.04	40.45	17.15	53.57	8027323	(3, 2), (3, 4)	ZNF257	ENSG00000197134	zinc finger protein 257 [Source:HGNC Symbol;Acc:HGNC:13498]	chr19	22052430	22091480	1	p12	38.1	protein_coding	5168
0.0018416	0.0294	125.14	266.26	384.88	172.51	7930498	(1, 2), (1, 3), (4, 3)	ACSL5	ENSG00000197142	acyl-CoA synthetase long chain family member 5 [Source:HGNC Symbol;Acc:HGNC:16526]	chr10	112374116	112428379	1	q25.2	42.88	protein_coding	4137
0.009915	0.0816	255.42	176.94	195.87	230.27	8116348	(2, 1), (2, 4)	TBC1D9B	ENSG00000197226	TBC1 domain family member 9B [Source:HGNC Symbol;Acc:HGNC:29097]	chr5	179862066	179907897	-1	q35.3	54.24	protein_coding	11511
0.0062667	0.0627	146.08	78.6	62.7	83.02	8151824	(2, 1), (3, 1), (4, 1)	RAD54B	ENSG00000197275	RAD54 homolog B [Source:HGNC Symbol;Acc:HGNC:17228]	chr8	94371960	94475115	-1	q22.1	36.72	protein_coding	5319
0.0039403	0.0474	259.57	170.06	269.19	204.28	7932796	(2, 1), (2, 3)	SVIL	ENSG00000197321	supervillin [Source:HGNC Symbol;Acc:HGNC:11480]	chr10	29457338	29736959	-1	p11.23	43.63	protein_coding	12536
< 1e-07	< 1e-07	297.43	126.45	243.51	122.12	8129804	(2, 1), (4, 1), (2, 3), (4, 3)	MAP3K5	ENSG00000197442	mitogen-activated protein kinase kinase kinase 5 [Source:HGNC Symbol;Acc:HGNC:6857]	chr6	136557046	136792477	-1	q23.3	39.89	protein_coding	5263
0.0054429	0.0582	144.29	132.81	85.64	148.51	8111584	(3, 1), (3, 4)	CPLANE1	ENSG00000197603	ciliogenesis and planar polarity effector 1 [Source:HGNC Symbol;Acc:HGNC:25801]	chr5	37106228	37249376	-1	p13.2	38.92	protein_coding	21307
0.0011021	0.0217	281.99	182.14	138.27	174.48	7919888	(2, 1), (3, 1), (4, 1)	CDC42SE1	ENSG00000197622	CDC42 small effector 1 [Source:HGNC Symbol;Acc:HGNC:17719]	chr1	151050971	151070325	-1	q21.3	46.96	protein_coding	4184
0.0026462	0.037	127.6	68.96	260.97	62.56	8056222	(2, 3), (4, 3)	DPP4	ENSG00000197635	dipeptidyl peptidase 4 [Source:HGNC Symbol;Acc:HGNC:3009]	chr2	161992245	162074394	-1	q24.2	39.64	protein_coding	14432
0.0011446	0.0221	364.56	381.56	400.23	512.87	8158317	(1, 4), (2, 4)	SPTAN1	ENSG00000197694	spectrin alpha, non-erythrocytic 1 [Source:HGNC Symbol;Acc:HGNC:11273]	chr9	128552558	128633662	1	q34.11	46.82	protein_coding	16305
8e-07	0.000119	49.79	103.06	51.6	134.16	8022817	(1, 2), (1, 4), (3, 2), (3, 4)	KLHL14	ENSG00000197705	kelch like family member 14 [Source:HGNC Symbol;Acc:HGNC:29266]	chr18	32672673	32773023	-1	q12.1	38.99	protein_coding	4951
0.0087504	0.0762	73.05	124.16	110.78	100.11	8180360	(1, 2)	OR8G1	ENSG00000197849	olfactory receptor family 8 subfamily G member 1 [Source:HGNC Symbol;Acc:HGNC:8484]	chr11	124241095	124254364	1	q24.2	34.26	protein_coding	5055
0.0003303	0.00933	253.81	165.7	275.67	144.99	8150036	(4, 1), (4, 3)	KIF13B	ENSG00000197892	kinesin family member 13B [Source:HGNC Symbol;Acc:HGNC:14405]	chr8	29067278	29263124	-1	p12	41.92	protein_coding	11113
0.0010484	0.0211	630.53	249.64	238.88	256.01	7979179	(2, 1), (3, 1), (4, 1)	ERO1A	ENSG00000197930	endoplasmic reticulum oxidoreductase 1 alpha [Source:HGNC Symbol;Acc:HGNC:13280]	chr14	52639915	52695900	-1	q22.1	37.59	protein_coding	7549
0.0007545	0.0166	399.03	202.15	218.48	230.91	7914202	(2, 1), (3, 1), (4, 1)	SNHG12	ENSG00000197989	small nucleolar RNA host gene 12 [Source:HGNC Symbol;Acc:HGNC:30062]	chr1	28578538	28583132	-1	p35.3	50.99	lncRNA	4266
0.0007019	0.0157	59.91	68.25	186.98	56.09	8044212	(1, 3), (2, 3), (4, 3)	SULT1C2	ENSG00000198203	sulfotransferase family 1C member 2 [Source:HGNC Symbol;Acc:HGNC:11456]	chr2	108288639	108309915	1	q12.3	44.42	protein_coding	8399
0.0005327	0.0129	128.18	112.3	210.35	103.4	8039607	(2, 3), (4, 3)	PEG3	ENSG00000198300	paternally expressed 3 [Source:HGNC Symbol;Acc:HGNC:8826]	chr19	56810077	56840728	-1	q13.43	45.74	protein_coding	9769
0.0093176	0.078	280.67	144.27	210.62	149.5	8150988	(2, 1), (4, 1)	ASPH	ENSG00000198363	aspartate beta-hydroxylase [Source:HGNC Symbol;Acc:HGNC:757]	chr8	61500556	61714640	-1	q12.3	38.17	protein_coding	20047
0.0065771	0.0645	110.51	147.89	100.54	103.77	8030908	(4, 2)	ZNF480	ENSG00000198464	zinc finger protein 480 [Source:HGNC Symbol;Acc:HGNC:23305]	chr19	52297169	52325922	1	q13.41	42.41	protein_coding	4844
4.6e-06	0.000473	133.8	160.03	442.68	150.62	8120833	(1, 3), (2, 3), (4, 3)	SH3BGRL2	ENSG00000198478	SH3 domain binding glutamate rich protein like 2 [Source:HGNC Symbol;Acc:HGNC:15567]	chr6	79631329	79703655	1	q14.1	38.81	protein_coding	4603
2e-07	4.2e-05	328.09	282.04	497.39	178.09	8056545	(4, 1), (2, 3), (4, 2), (4, 3)	STK39	ENSG00000198648	serine/threonine kinase 39 [Source:HGNC Symbol;Acc:HGNC:17717]	chr2	167954020	168247595	-1	q24.3	40.12	protein_coding	3701
0.0011116	0.0218	160.6	122.21	192.28	103.89	7928944	(4, 1), (4, 3)	PAPSS2	ENSG00000198682	3'-phosphoadenosine 5'-phosphosulfate synthase 2 [Source:HGNC Symbol;Acc:HGNC:8604]	chr10	87659613	87747705	1	q23.2	40.41	protein_coding	4083
0.0001663	0.00598	361.1	394.16	294	606.52	8068361	(1, 4), (2, 4), (3, 4)	SLC5A3	ENSG00000198743	solute carrier family 5 member 3 [Source:HGNC Symbol;Acc:HGNC:11038]	chr21	34073578	34106260	1	q22.11	39.02	protein_coding	11566
0.0035878	0.0447	190.7	206.86	161.71	250.39	8068353	(3, 4)	SLC5A3	ENSG00000198743	solute carrier family 5 member 3 [Source:HGNC Symbol;Acc:HGNC:11038]	chr21	34073578	34106260	1	q22.11	39.02	protein_coding	11566
1.18e-05	0.000873	55.54	133.38	92.77	151.64	7965226	(1, 2), (1, 4)	RASSF9	ENSG00000198774	Ras association domain family member 9 [Source:HGNC Symbol;Acc:HGNC:15739]	chr12	85800703	85836409	-1	q21.31	34.15	protein_coding	5515
0.000298	0.00888	367.64	170.08	176.89	154.65	7973067	(2, 1), (3, 1), (4, 1)	PNP	ENSG00000198805	purine nucleoside phosphorylase [Source:HGNC Symbol;Acc:HGNC:7892]	chr14	20468954	20477089	1	q11.2	47.12	protein_coding	4134
0.0086589	0.0758	514.35	491.05	222.62	453.1	8154305	(3, 1), (3, 2), (3, 4)	SELENOT	ENSG00000198843	selenoprotein T [Source:HGNC Symbol;Acc:HGNC:18136]	chr3	150602875	150630445	1	q25.1	37.86	protein_coding	4135
0.0073527	0.0684	442.78	288.71	196.83	246.3	8135625	(3, 1), (4, 1)	CAPZA2	ENSG00000198898	capping actin protein of muscle Z-line subunit alpha 2 [Source:HGNC Symbol;Acc:HGNC:1490]	chr7	116811070	116922049	1	q31.2	38.99	protein_coding	8368
0.0082341	0.0733	148.24	131.83	95.7	93.7	8122013	(4, 1)	L3MBTL3	ENSG00000198945	L3MBTL histone methyl-lysine binding protein 3 [Source:HGNC Symbol;Acc:HGNC:23035]	chr6	130013699	130141449	1	q23.1	38.41	protein_coding	5111
0.0005822	0.0137	446.96	199.64	161.84	269.36	8066214	(2, 1), (3, 1)	TGM2	ENSG00000198959	transglutaminase 2 [Source:HGNC Symbol;Acc:HGNC:11778]	chr20	38127385	38166578	-1	q11.23	52.67	protein_coding	7948
2.57e-05	0.00152	96.64	48.8	47.89	45.91	8127498	(2, 1), (3, 1), (4, 1)	MIR30C2	ENSG00000199094	microRNA 30c-2 [Source:HGNC Symbol;Acc:HGNC:31627]	chr6	71376960	71377031	-1	q13	41.67	miRNA	72
0.0083176	0.0736	42.62	30.96	63.17	31.38	7976816	(2, 3), (4, 3)	SNORD114-3	ENSG00000201839	small nucleolar RNA, C/D box 114-3 [Source:HGNC Symbol;Acc:HGNC:32991]	chr14	100953349	100953423	1	q32.31	48	snoRNA	75
0.0085147	0.0747	219.51	382.56	591.68	427.16	8179861	(1, 3), (1, 4)	NEU1	ENSG00000204386	neuraminidase 1 [Source:HGNC Symbol;Acc:HGNC:7758]	chr6	31857659	31862905	-1	p21.33	52.85	protein_coding	4821
0.0025025	0.0358	599.6	660.81	320.52	748.83	8118174	(3, 2), (3, 4)	PRRC2A	ENSG00000204469	proline rich coiled-coil 2A [Source:HGNC Symbol;Acc:HGNC:13918]	chr6	31620715	31637771	1	p21.33	53.44	protein_coding	9120
4.95e-05	0.00246	288.99	194.25	133	245.68	8147040	(2, 1), (3, 1), (3, 4)	ZBTB10	ENSG00000205189	zinc finger and BTB domain containing 10 [Source:HGNC Symbol;Acc:HGNC:30953]	chr8	80485619	80526265	1	q21.13	38.89	protein_coding	10216
0.0029869	0.0398	296.84	208.68	114.31	184.23	8107613	(3, 1)	SNX2	ENSG00000205302	sorting nexin 2 [Source:HGNC Symbol;Acc:HGNC:11173]	chr5	122775079	122834543	1	q23.2	35.79	protein_coding	8606
0.0091328	0.0773	255.99	298.74	166.94	286.91	8105104	(3, 2), (3, 4)	C5orf51	ENSG00000205765	chromosome 5 open reading frame 51 [Source:HGNC Symbol;Acc:HGNC:27750]	chr5	41904188	41921636	1	p13.1	36.01	protein_coding	5577
0.0001087	0.00434	106.77	125.4	125.27	178.77	7973724	(1, 4), (2, 4)	NYNRIN	ENSG00000205978	NYN domain and retroviral integrase containing [Source:HGNC Symbol;Acc:HGNC:20165]	chr14	24399003	24419283	1	q12	52.76	protein_coding	7733
0.0053767	0.0576	268.21	180.22	170.28	173.98	7992337	(2, 1), (3, 1), (4, 1)	JPT2	ENSG00000206053	Jupiter microtubule associated homolog 2 [Source:HGNC Symbol;Acc:HGNC:14137]	chr16	1678256	1702280	1	p13.3	47.78	protein_coding	4768
0.0011818	0.0225	351.61	236.95	472.45	209.05	8130578	(2, 3), (4, 3)	SNORA20	ENSG00000207392	small nucleolar RNA, H/ACA box 20 [Source:HGNC Symbol;Acc:HGNC:32610]	chr6	159780250	159780381	-1	q25.3	40.15	snoRNA	132
0.0004486	0.0117	648.1	175.68	130.77	221.85	8109333	(2, 1), (3, 1), (4, 1)	GPX3	ENSG00000211445	glutathione peroxidase 3 [Source:HGNC Symbol;Acc:HGNC:4555]	chr5	151020438	151028992	1	q33.1	53.03	protein_coding	3162
0.0029246	0.0394	106.51	73.44	62.69	62.14	7923141	(3, 1), (4, 1)	DENND1B	ENSG00000213047	DENN domain containing 1B [Source:HGNC Symbol;Acc:HGNC:28404]	chr1	197504748	197775696	-1	q31.3	34.32	protein_coding	13203
0.0090361	0.0769	326.47	231.5	165.04	293.59	7907135	(3, 1), (3, 4)	SFT2D2	ENSG00000213064	SFT2 domain containing 2 [Source:HGNC Symbol;Acc:HGNC:25140]	chr1	168225938	168253021	1	q24.2	43.38	protein_coding	11217
0.0013021	0.0236	150.03	157.64	125.41	205.76	8041206	(3, 4)	LBH	ENSG00000213626	LBH regulator of WNT signaling pathway [Source:HGNC Symbol;Acc:HGNC:29532]	chr2	30231534	30323730	1	p23.1	46.96	protein_coding	4532
0.0070932	0.0672	640.8	832.26	433.07	770.87	8041122	(3, 2), (3, 4)	PPP1CB	ENSG00000213639	protein phosphatase 1 catalytic subunit beta [Source:HGNC Symbol;Acc:HGNC:9282]	chr2	28751640	28802940	1	p23.2	38.98	protein_coding	5760
0.0050288	0.0554	153.82	84.97	61.08	96.9	8027254	(2, 1), (3, 1)	ZNF90	ENSG00000213988	zinc finger protein 90 [Source:HGNC Symbol;Acc:HGNC:13165]	chr19	20077994	20127076	1	p12	41	protein_coding	6088
< 1e-07	2.57e-05	55.2	66.26	145.08	64.98	7973084	(1, 3), (2, 3), (4, 3)	ANG	ENSG00000214274	angiogenin [Source:HGNC Symbol;Acc:HGNC:483]	chr14	20684177	20698971	1	q11.2	43.52	protein_coding	1439
0.000373	0.0102	196.43	130.37	278.43	139.09	7976795	(2, 3), (4, 3)	MEG3	ENSG00000214548	maternally expressed 3 [Source:HGNC Symbol;Acc:HGNC:14575]	chr14	100779410	100861031	1	q32.2	51.68	lncRNA	23224
0.0030757	0.0405	1062	815.05	620.1	721.81	8166876	(3, 1), (4, 1)	DDX3X	ENSG00000215301	DEAD-box helicase 3 X-linked [Source:HGNC Symbol;Acc:HGNC:2745]	chrX	41333348	41364472	1	p11.4	42.68	protein_coding	15828
0.0044631	0.0511	292.55	210.29	184.24	193.05	7898211	(3, 1), (4, 1)	RSC1A1	ENSG00000215695	regulator of solute carriers 1 [Source:HGNC Symbol;Acc:HGNC:10458]	chr1	15659869	15661722	1	p36.21	42.83	protein_coding	1854
0.0010466	0.0211	317.69	203.89	210.35	210.06	8150592	(2, 1), (3, 1), (4, 1)	CEBPD	ENSG00000221869	CCAAT enhancer binding protein delta [Source:HGNC Symbol;Acc:HGNC:1835]	chr8	47736913	47738164	-1	q11.21	65.97	protein_coding	1252
0.0047226	0.0532	29.87	44.32	50.67	46.34	8136961	(1, 2), (1, 3), (1, 4)	OR2F2	ENSG00000221910	olfactory receptor family 2 subfamily F member 2 [Source:HGNC Symbol;Acc:HGNC:8247]	chr7	143935233	143936186	1	q35	49.9	protein_coding	954
0.0015345	0.0263	304.28	427.82	227.61	358.09	7917674	(3, 2), (3, 4)	SETSIP	ENSG00000230667	SET like protein [Source:HGNC Symbol;Acc:HGNC:42937]	chr1	92074533	92075441	-1	p22.1	41.14	protein_coding	909
2.69e-05	0.00154	185.26	86.2	72.18	84.13	8127502	(2, 1), (3, 1), (4, 1)	LINC00472	ENSG00000233237	long intergenic non-protein coding RNA 472 [Source:HGNC Symbol;Acc:HGNC:21380]	chr6	71343427	71420745	-1	q13	37.13	lncRNA	19875
0.0080028	0.0719	822.18	502.34	449.39	668.95	8180346	(2, 1), (3, 1)	GPX1	ENSG00000233276	glutathione peroxidase 1 [Source:HGNC Symbol;Acc:HGNC:4553]	chr3	49357176	49358353	-1	p21.31	62.31	protein_coding	1178
0.0021729	0.0328	47.97	53.06	55.22	39.22	8165945	(4, 2), (4, 3)	CLDN34	ENSG00000234469	claudin 34 [Source:HGNC Symbol;Acc:HGNC:51259]	chrX	9967358	9968352	1	p22.2	44.82	protein_coding	995
0.0001411	0.00518	611.16	215.96	281.69	168.41	7958253	(2, 1), (4, 1)	C12orf75	ENSG00000235162	chromosome 12 open reading frame 75 [Source:HGNC Symbol;Acc:HGNC:35164]	chr12	105235290	105396097	1	q23.3	41.95	protein_coding	2693
< 1e-07	< 1e-07	46.54	41.49	105.42	27.78	8096682	(1, 3), (4, 1), (2, 3), (4, 2), (4, 3)	ARHGEF38	ENSG00000236699	Rho guanine nucleotide exchange factor 38 [Source:HGNC Symbol;Acc:HGNC:25968]	chr4	105552620	105708093	1	q24	36.36	protein_coding	7580
0.0046052	0.0521	76.91	109.4	109.41	74.49	8005957	(4, 2)	SNORD4B	ENSG00000238597	small nucleolar RNA, C/D box 4B [Source:HGNC Symbol;Acc:HGNC:10098]	chr17	28723682	28723753	1	q11.2	41.67	snoRNA	72
0.0078777	0.0711	382.15	379.3	213.6	419.18	7951036	(3, 2), (3, 4)	SNORD5	ENSG00000239195	small nucleolar RNA, C/D box 5 [Source:HGNC Symbol;Acc:HGNC:32702]	chr11	93733228	93733300	-1	q21	35.62	snoRNA	73
0.0011304	0.0221	243.44	132.41	135.44	134.06	8090715	(2, 1), (3, 1), (4, 1)	ACAD11	ENSG00000240303	acyl-CoA dehydrogenase family member 11 [Source:HGNC Symbol;Acc:HGNC:30211]	chr3	132558138	132660082	-1	q22.1	37.44	protein_coding	5033
1.33e-05	0.00095	244.25	170.14	508.29	104.57	7967107	(4, 1), (2, 3), (4, 3)	HNF1A-AS1	ENSG00000241388	HNF1A antisense RNA 1 [Source:HGNC Symbol;Acc:HGNC:26785]	chr12	120941728	120980965	-1	q24.31	49.08	lncRNA	4671
0.0001035	0.00427	191.1	154.77	103.33	104.66	8076515	(3, 1), (4, 1), (4, 2)	ARFGAP3	ENSG00000242247	ADP ribosylation factor GTPase activating protein 3 [Source:HGNC Symbol;Acc:HGNC:661]	chr22	42796502	42858106	-1	q13.2	45	protein_coding	3273
0.0007658	0.0167	203.7	447.03	176.96	693.63	8178115	(1, 4), (3, 4)	CFB	ENSG00000243649	complement factor B [Source:HGNC Symbol;Acc:HGNC:1037]	chr6	31945650	31952084	1	p21.33	52.62	protein_coding	4731
0.0011458	0.0221	343.78	550.55	257.63	852.94	8179351	(1, 4), (3, 4)	CFB	ENSG00000243649	complement factor B [Source:HGNC Symbol;Acc:HGNC:1037]	chr6	31945650	31952084	1	p21.33	52.62	protein_coding	4731
0.0087591	0.0763	82.14	88.28	134.35	78.37	8127072	(4, 3)	GSTA1	ENSG00000243955	glutathione S-transferase alpha 1 [Source:HGNC Symbol;Acc:HGNC:4626]	chr6	52791371	52803860	-1	p12.2	40.45	protein_coding	1262
0.0001861	0.00653	88.11	62.29	126.81	53.53	8056102	(4, 1), (2, 3), (4, 3)	LY75-CD302	ENSG00000248672	LY75-CD302 readthrough [Source:HGNC Symbol;Acc:HGNC:38828]	chr2	159771851	159904710	-1	q24.2	38.37	protein_coding	5650
0.001907	0.0301	740.64	555.98	281.08	617.14	8054519	(3, 1), (3, 2), (3, 4)	LIMS4	ENSG00000256671	LIM zinc finger domain containing 4 [Source:HGNC Symbol;Acc:HGNC:39941]	chr2	110446640	110473075	-1	q13	41.78	protein_coding	2553
0.0005308	0.0128	455.32	122.33	138.36	157.67	8007931	(2, 1), (3, 1), (4, 1)	ITGB3	ENSG00000259207	integrin subunit beta 3 [Source:HGNC Symbol;Acc:HGNC:6156]	chr17	47253827	47313743	1	q21.32	46.53	protein_coding	6340
< 1e-07	< 1e-07	208.98	255.89	124.78	1042.28	7938608	(1, 4), (2, 4), (3, 4)	SPON1	ENSG00000262655	spondin 1 [Source:HGNC Symbol;Acc:HGNC:11252]	chr11	13962723	14268133	1	p15.2	41.98	protein_coding	5317
0.0072845	0.0681	415.51	423.41	583.7	380.05	8076223	(4, 3)	SNORD43	ENSG00000263764	small nucleolar RNA, C/D box 43 [Source:HGNC Symbol;Acc:HGNC:10182]	chr22	39319050	39319113	-1	q13.1	45.31	snoRNA	64
0.0025835	0.0365	221.45	158.68	96.38	296.92	7923875	(3, 4)	RHEX	ENSG00000263961	regulator of hemoglobinization and erythroid cell expansion [Source:HGNC Symbol;Acc:HGNC:25341]	chr1	206053173	206102449	1	q32.1	44.16	protein_coding	1721
0.0044213	0.0509	22.21	31.68	25.83	17.05	8169504	(4, 2)	SLC6A14	ENSG00000268104	solute carrier family 6 member 14 [Source:HGNC Symbol;Acc:HGNC:11047]	chrX	116436606	116461458	1	q23	33.32	protein_coding	4536
0.0001728	0.00618	406.47	597.6	259.38	467.83	7948904	(3, 2), (3, 4)	SNORD28	ENSG00000274544	small nucleolar RNA, C/D box 28 [Source:HGNC Symbol;Acc:HGNC:10150]	chr11	62854621	62854695	-1	q12.3	36	snoRNA	75
0.0009449	0.0195	292.4	207.63	192.3	178.23	8014551	(4, 1)	SYNRG	ENSG00000275066	synergin gamma [Source:HGNC Symbol;Acc:HGNC:557]	chr17	37514807	37609472	-1	q12	40.77	protein_coding	14243
0.0088017	0.0764	102.19	107.46	202.34	147.2	8036787	(1, 3), (2, 3)	FCGBP	ENSG00000275395	Fc fragment of IgG binding protein [Source:HGNC Symbol;Acc:HGNC:13572]	chr19	39863323	39934626	-1	q13.2	51.41	protein_coding	12961
3e-07	5.51e-05	175.17	71.2	113.82	59.94	8014591	(2, 1), (4, 1), (4, 3)	HNF1B	ENSG00000275410	HNF1 homeobox B [Source:HGNC Symbol;Acc:HGNC:11630]	chr17	37686431	37745059	-1	q12	48.08	protein_coding	5774
0.0017634	0.0286	75.71	100.34	120.06	138.42	8136790	(1, 4)	PRSS2	ENSG00000275896	serine protease 2 [Source:HGNC Symbol;Acc:HGNC:9483]	chr7	142760398	142774564	1	q34	49.02	protein_coding	1259
0.0012114	0.0229	127.44	184.71	298.54	242.67	8136807	(1, 3), (1, 4)	PRSS2	ENSG00000275896	serine protease 2 [Source:HGNC Symbol;Acc:HGNC:9483]	chr7	142760398	142774564	1	q34	49.02	protein_coding	1259
0.0035372	0.0442	42.5	40.92	19.84	43.44	7948906	(3, 1), (3, 2), (3, 4)	SNORD27	ENSG00000275996	small nucleolar RNA, C/D box 27 [Source:HGNC Symbol;Acc:HGNC:10149]	chr11	62855012	62855083	-1	q12.3	37.5	snoRNA	72
0.0005753	0.0136	256.15	368.17	207.54	356.47	7948908	(3, 2), (3, 4)	SNORD26	ENSG00000276788	small nucleolar RNA, C/D box 26 [Source:HGNC Symbol;Acc:HGNC:10148]	chr11	62855292	62855366	-1	q12.3	40	snoRNA	75
9.5e-06	0.000763	313.68	148.94	127.04	125.04	8014574	(2, 1), (3, 1), (4, 1)	DDX52	ENSG00000278053	DExD-box helicase 52 [Source:HGNC Symbol;Acc:HGNC:20038]	chr17	37609739	37643446	-1	q12	39.55	protein_coding	9528
0.0088554	0.0766	734.95	544.02	833.21	545.17	8014603	(4, 3)	TBC1D3C	ENSG00000278299	TBC1 domain family member 3C [Source:HGNC Symbol;Acc:HGNC:24889]	chr17	38057693	38068634	-1	q12	60.14	protein_coding	2105
0.00234	0.0344	300.61	143.19	167.24	167.19	7914216	(2, 1), (4, 1)	SNORA16A	ENSG00000280498	small nucleolar RNA, H/ACA box 16A [Source:HGNC Symbol;Acc:HGNC:32605]	chr1	28580920	28581054	-1	p35.3	48.15	snoRNA	135
0.0025256	0.0359	478.14	138.95	179.61	253.09	8008885	(2, 1)	MIR21	ENSG00000284190	microRNA 21 [Source:HGNC Symbol;Acc:HGNC:31586]	chr17	59841266	59841337	1	q23.1	48.61	miRNA	72
0.0023013	0.0341	354.75	103.81	73.68	126.71	8065084	(2, 1), (3, 1), (4, 1)		ENSG00000286546	novel transcript, antisense to MACROD2	chr20	15892355	15985876	-1	p12.1	38.94	lncRNA	2297
0.0002186	0.00721	92.52	110.41	86.32	143.8	8004201	(1, 4), (3, 4)	ALOX12P2	ENSG00000291084	arachidonate 12-lipoxygenase pseudogene 2	chr17	6853861	6954107	1			lncRNA
0.0006521	0.015	890.65	337.72	202.53	303.36	8130556	(2, 1), (3, 1), (4, 1)	SOD2	ENSG00000291237	superoxide dismutase 2	chr6	159669069	159762529	-1			protein_coding

## Sheet: GSE26193
Parametric p-value	FDR	Adenocarcinoma (1)	Clear cell (2)	Endometrioid (3)	Mucinous (4)	Serous (5)	ProbeSet	Pairwise significant	Gene_ID	Gene_description	Chromosome_scaffold_name	Gene_start_bp	Gene_end_bp	Strand	Karyotype_band	Gene_name	Gene_GC_content	Gene_type	Gene_Length
0.0025767	0.0169	80.56	116.51	135.74	138.1	100.44	205607_s_at	(1, 4), (5, 3), (5, 4)	ENSG00000000457	SCY1 like pseudokinase 3 [Source:HGNC Symbol;Acc:HGNC:19285]	chr1	169849631	169894267	-1	q24.2	SCYL3	40.14	protein_coding	6883
0.0021106	0.0147	123.13	58.1	122.72	166.04	136.3	225876_at	(2, 3), (2, 4), (2, 5)	ENSG00000001461	NIPA like domain containing 3 [Source:HGNC Symbol;Acc:HGNC:25233]	chr1	24415802	24472976	1	p36.11	NIPAL3	44.99	protein_coding	9396
0.004151	0.0242	81.21	48.5	85.18	113.78	96.1	225875_s_at	(2, 4), (2, 5)	ENSG00000001461	NIPA like domain containing 3 [Source:HGNC Symbol;Acc:HGNC:25233]	chr1	24415802	24472976	1	p36.11	NIPAL3	44.99	protein_coding	9396
0.0001635	0.00219	136.19	79.91	53.27	75.49	107.85	212173_at	(3, 1), (3, 5)	ENSG00000004455	adenylate kinase 2 [Source:HGNC Symbol;Acc:HGNC:362]	chr1	33007940	33080996	-1	p35.1	AK2	46.32	protein_coding	9625
0.0018352	0.0132	69.37	51.46	58.43	62.11	100.94	212172_at	(2, 5), (3, 5)	ENSG00000004455	adenylate kinase 2 [Source:HGNC Symbol;Acc:HGNC:362]	chr1	33007940	33080996	-1	p35.1	AK2	46.32	protein_coding	9625
5.55e-05	0.000964	121.88	71.91	53.22	94.99	116.37	205996_s_at	(3, 1), (3, 5)	ENSG00000004455	adenylate kinase 2 [Source:HGNC Symbol;Acc:HGNC:362]	chr1	33007940	33080996	-1	p35.1	AK2	46.32	protein_coding	9625
0.0007783	0.00711	262.23	144.65	86.54	187.45	202.1	212174_at	(3, 1), (3, 4), (3, 5)	ENSG00000004455	adenylate kinase 2 [Source:HGNC Symbol;Acc:HGNC:362]	chr1	33007940	33080996	-1	p35.1	AK2	46.32	protein_coding	9625
0.0020371	0.0143	63.94	59.58	81.11	263.79	138.17	235651_at	(1, 4), (2, 4), (3, 4)	ENSG00000006555	tetratricopeptide repeat domain 22 [Source:HGNC Symbol;Acc:HGNC:26067]	chr1	54779712	54801323	-1	p32.3	TTC22	52.34	protein_coding	6111
3.5e-06	0.000112	70.22	59.77	73.66	149.16	63.75	1556034_s_at	(1, 4), (2, 4), (3, 4), (5, 4)	ENSG00000014914	myotubularin related protein 11 [Source:HGNC Symbol;Acc:HGNC:24307]	chr1	149928651	149936879	-1	q21.2	MTMR11	49.97	protein_coding	4572
0.0016573	0.0123	40.63	45.8	58.16	110.24	42.69	205076_s_at	(2, 4), (5, 4)	ENSG00000014914	myotubularin related protein 11 [Source:HGNC Symbol;Acc:HGNC:24307]	chr1	149928651	149936879	-1	q21.2	MTMR11	49.97	protein_coding	4572
0.0068688	0.0342	10.14	15.91	32.11	11.27	11.82	203296_s_at	(4, 3), (5, 3)	ENSG00000018625	ATPase Na+/K+ transporting subunit alpha 2 [Source:HGNC Symbol;Acc:HGNC:800]	chr1	160115759	160143591	1	q23.2	ATP1A2	50.38	protein_coding	6298
0.0052508	0.0284	424.31	271.78	192.18	226.6	252.33	212101_at	(3, 1), (4, 1), (5, 1)	ENSG00000025800	karyopherin subunit alpha 6 [Source:HGNC Symbol;Acc:HGNC:6399]	chr1	32108056	32176563	1	p35.2	KPNA6	44.21	protein_coding	7457
0.0048289	0.0268	91.35	45.87	87.71	94.86	108.83	221045_s_at	(2, 5)	ENSG00000049246	period circadian regulator 3 [Source:HGNC Symbol;Acc:HGNC:8847]	chr1	7784291	7845177	1	p36.23	PER3	40.55	protein_coding	8128
0.00376	0.0224	99.33	158.02	88.73	124.78	69.88	221561_at	(5, 2)	ENSG00000057252	sterol O-acyltransferase 1 [Source:HGNC Symbol;Acc:HGNC:11177]	chr1	179293714	179358680	1	q25.2	SOAT1	39.63	protein_coding	7005
3.9e-06	0.000121	264.57	302.86	365.18	222.07	504.04	212136_at	(2, 5), (4, 5)	ENSG00000058668	ATPase plasma membrane Ca2+ transporting 4 [Source:HGNC Symbol;Acc:HGNC:817]	chr1	203626787	203744081	1	q32.1	ATP2B4	46.48	protein_coding	9495
1.76e-05	0.000395	388.96	466.63	562.46	318.71	733	212135_s_at	(4, 5)	ENSG00000058668	ATPase plasma membrane Ca2+ transporting 4 [Source:HGNC Symbol;Acc:HGNC:817]	chr1	203626787	203744081	1	q32.1	ATP2B4	46.48	protein_coding	9495
0.0023049	0.0156	29.5	33.72	45.2	25.99	52.29	205410_s_at	(4, 5)	ENSG00000058668	ATPase plasma membrane Ca2+ transporting 4 [Source:HGNC Symbol;Acc:HGNC:817]	chr1	203626787	203744081	1	q32.1	ATP2B4	46.48	protein_coding	9495
0.0032051	0.0199	436.47	136.51	234.26	216.5	272.72	201996_s_at	(2, 1), (2, 5)	ENSG00000065526	spen family transcriptional repressor [Source:HGNC Symbol;Acc:HGNC:17575]	chr1	15836095	15940456	1	p36.21	SPEN	43.57	protein_coding	14336
0.0009486	0.00828	133.41	60.11	108	95.67	121.52	1556059_s_at	(2, 1), (2, 3), (2, 5)	ENSG00000065526	spen family transcriptional repressor [Source:HGNC Symbol;Acc:HGNC:17575]	chr1	15836095	15940456	1	p36.21	SPEN	43.57	protein_coding	14336
0.0022795	0.0155	253.05	128.76	165.13	89.33	102	222752_s_at	(4, 1), (5, 1), (5, 3)	ENSG00000065600	proton activated chloride channel 1 [Source:HGNC Symbol;Acc:HGNC:25593]	chr1	212363928	212414901	-1	q32.3	PACC1	44.57	protein_coding	2917
0.0001402	0.00193	200.04	185.53	162.38	274.58	143.08	209717_at	(3, 4), (5, 4)	ENSG00000067208	ecotropic viral integration site 5 [Source:HGNC Symbol;Acc:HGNC:3501]	chr1	92508696	92792404	-1	p22.1	EVI5	38.19	protein_coding	8277
0.0025798	0.0169	37.71	35.43	23.59	20.61	53.56	210889_s_at	(3, 5), (4, 5)	ENSG00000072694	Fc fragment of IgG receptor IIb [Source:HGNC Symbol;Acc:HGNC:3618]	chr1	161663147	161678654	1	q23.3	FCGR2B	47.24	protein_coding	6651
0.0016458	0.0123	68.71	48.24	148.21	147.99	123.42	213030_s_at	(2, 3), (2, 4), (2, 5)	ENSG00000076356	plexin A2 [Source:HGNC Symbol;Acc:HGNC:9100]	chr1	208022242	208244384	-1	q32.2	PLXNA2	47.99	protein_coding	13845
3e-07	1.49e-05	294.01	719.62	346.21	305.53	233.44	200827_at	(1, 2), (3, 2), (4, 2), (5, 2)	ENSG00000083444	procollagen-lysine,2-oxoglutarate 5-dioxygenase 1 [Source:HGNC Symbol;Acc:HGNC:9081]	chr1	11934205	11975538	1	p36.22	PLOD1	53.54	protein_coding	5320
0.0002426	0.00297	72.58	72.41	61.55	194.32	45.06	210652_s_at	(3, 4), (5, 4)	ENSG00000085831	tetratricopeptide repeat domain 39A [Source:HGNC Symbol;Acc:HGNC:18657]	chr1	51287258	51345116	-1	p32.3	TTC39A	51.4	protein_coding	9491
0.0008939	0.0079	39.95	18.68	37.07	20.67	16.48	231944_at	(5, 3)	ENSG00000086619	endoplasmic reticulum oxidoreductase 1 beta [Source:HGNC Symbol;Acc:HGNC:14355]	chr1	236215101	236281958	-1	q42.3	ERO1B	37.44	protein_coding	5788
0.0020195	0.0142	21.77	11.01	21.73	10.13	11.53	220012_at	(4, 3), (5, 3)	ENSG00000086619	endoplasmic reticulum oxidoreductase 1 beta [Source:HGNC Symbol;Acc:HGNC:14355]	chr1	236215101	236281958	-1	q42.3	ERO1B	37.44	protein_coding	5788
8e-05	0.00127	102.35	127.52	93.87	191.71	104.7	209453_at	(1, 4), (3, 4), (5, 4)	ENSG00000090020	solute carrier family 9 member A1 [Source:HGNC Symbol;Acc:HGNC:11071]	chr1	27098809	27166981	-1	p36.11	SLC9A1	51.7	protein_coding	6195
0.0042358	0.0245	38.21	38.28	25.19	26.37	77.88	202988_s_at	(3, 5), (4, 5)	ENSG00000090104	regulator of G protein signaling 1 [Source:HGNC Symbol;Acc:HGNC:9991]	chr1	192575763	192580024	1	q31.2	RGS1	33.81	protein_coding	4074
0.0019049	0.0136	240.13	184.43	109.56	104.66	341.13	216834_at	(3, 5), (4, 5)	ENSG00000090104	regulator of G protein signaling 1 [Source:HGNC Symbol;Acc:HGNC:9991]	chr1	192575763	192580024	1	q31.2	RGS1	33.81	protein_coding	4074
1e-07	5.91e-06	10.36	14.99	36.71	15.15	14.21	226653_at	(1, 3), (2, 3), (4, 3), (5, 3)	ENSG00000116141	microtubule affinity regulating kinase 1 [Source:HGNC Symbol;Acc:HGNC:6896]	chr1	220528136	220664461	1	q41	MARK1	37.11	protein_coding	15255
1.83e-05	0.000407	20.34	34.09	71.93	35.01	31.5	221047_s_at	(1, 3), (2, 3), (4, 3), (5, 3)	ENSG00000116141	microtubule affinity regulating kinase 1 [Source:HGNC Symbol;Acc:HGNC:6896]	chr1	220528136	220664461	1	q41	MARK1	37.11	protein_coding	15255
0.001442	0.0111	143.66	153.05	158.49	150.5	109.68	201611_s_at	(5, 3)	ENSG00000116237	isoprenylcysteine carboxyl methyltransferase [Source:HGNC Symbol;Acc:HGNC:5350]	chr1	6221193	6235972	-1	p36.31	ICMT	49.59	protein_coding	4910
2.8e-06	9.33e-05	144.41	457.59	224.94	440.48	190.13	201482_at	(1, 2), (1, 4), (5, 2), (3, 4), (5, 4)	ENSG00000116260	quiescin sulfhydryl oxidase 1 [Source:HGNC Symbol;Acc:HGNC:9756]	chr1	180154869	180204030	1	q25.2	QSOX1	51.85	protein_coding	9276
1e-06	4.02e-05	17.42	13.11	87.11	53.44	17.95	221874_at	(1, 3), (2, 3), (2, 4), (5, 3), (5, 4)	ENSG00000116299	endosome-lysosome associated apoptosis and autophagy regulator 1 [Source:HGNC Symbol;Acc:HGNC:29618]	chr1	109113679	109206781	1	p13.3	ELAPOR1	45.89	protein_coding	9194
4e-07	1.89e-05	41.02	49.77	588.01	288.27	56.59	226248_s_at	(1, 3), (2, 3), (2, 4), (5, 3), (5, 4)	ENSG00000116299	endosome-lysosome associated apoptosis and autophagy regulator 1 [Source:HGNC Symbol;Acc:HGNC:29618]	chr1	109113679	109206781	1	p13.3	ELAPOR1	45.89	protein_coding	9194
1.6e-06	5.95e-05	22.49	22.89	79.28	46.96	23.17	243349_at	(1, 3), (2, 3), (5, 3), (5, 4)	ENSG00000116299	endosome-lysosome associated apoptosis and autophagy regulator 1 [Source:HGNC Symbol;Acc:HGNC:29618]	chr1	109113679	109206781	1	p13.3	ELAPOR1	45.89	protein_coding	9194
< 1e-07	< 1e-07	408.78	349.81	404.91	744.09	328.36	223243_s_at	(1, 4), (2, 4), (3, 4), (5, 4)	ENSG00000116406	ER degradation enhancing alpha-mannosidase like protein 3 [Source:HGNC Symbol;Acc:HGNC:16787]	chr1	184690237	184754907	-1	q25.3	EDEM3	34.39	protein_coding	7792
8e-07	3.37e-05	132	93.75	137.85	227.55	94.4	220342_x_at	(2, 4), (5, 4)	ENSG00000116406	ER degradation enhancing alpha-mannosidase like protein 3 [Source:HGNC Symbol;Acc:HGNC:16787]	chr1	184690237	184754907	-1	q25.3	EDEM3	34.39	protein_coding	7792
1.1e-06	4.38e-05	112.83	95.32	110.45	220.98	91.76	220926_s_at	(2, 4), (3, 4), (5, 4)	ENSG00000116406	ER degradation enhancing alpha-mannosidase like protein 3 [Source:HGNC Symbol;Acc:HGNC:16787]	chr1	184690237	184754907	-1	q25.3	EDEM3	34.39	protein_coding	7792
0.0010001	0.00856	96.96	30.6	38.43	45.16	39.76	228548_at	(2, 1), (3, 1), (4, 1), (5, 1)	ENSG00000116473	RAP1A, member of RAS oncogene family [Source:HGNC Symbol;Acc:HGNC:9855]	chr1	111542218	111716691	1	p13.2	RAP1A	39.31	protein_coding	5532
0.0005945	0.00585	81.26	61.55	65.44	94.21	110.64	213038_at	(2, 5), (3, 5)	ENSG00000116514	ring finger protein 19B [Source:HGNC Symbol;Acc:HGNC:26886]	chr1	32936445	32964809	-1	p35.1	RNF19B	44.5	protein_coding	2734
0.0044302	0.0253	75.15	62.67	58.23	73.8	93.39	36564_at	(3, 5)	ENSG00000116514	ring finger protein 19B [Source:HGNC Symbol;Acc:HGNC:26886]	chr1	32936445	32964809	-1	p35.1	RNF19B	44.5	protein_coding	2734
0.0020872	0.0145	125.63	156.39	96.97	99.22	138.36	223555_at	(3, 2), (4, 2), (3, 5), (4, 5)	ENSG00000116580	gon-4 like [Source:HGNC Symbol;Acc:HGNC:25973]	chr1	155749659	155859400	-1	q22	GON4L	44.03	protein_coding	11970
0.0012301	0.00989	20.37	18.86	24.57	21.69	29.31	1554783_s_at	(2, 5)	ENSG00000116584	Rho/Rac guanine nucleotide exchange factor 2 [Source:HGNC Symbol;Acc:HGNC:682]	chr1	155946851	156007070	-1	q22	ARHGEF2	50.95	protein_coding	9155
2.38e-05	0.000502	405.73	353.98	373.05	354.79	570.37	209435_s_at	(2, 5), (3, 5), (4, 5)	ENSG00000116584	Rho/Rac guanine nucleotide exchange factor 2 [Source:HGNC Symbol;Acc:HGNC:682]	chr1	155946851	156007070	-1	q22	ARHGEF2	50.95	protein_coding	9155
8.06e-05	0.00127	84.7	76.27	89.53	80.66	131.56	207629_s_at	(2, 5), (3, 5), (4, 5)	ENSG00000116584	Rho/Rac guanine nucleotide exchange factor 2 [Source:HGNC Symbol;Acc:HGNC:682]	chr1	155946851	156007070	-1	q22	ARHGEF2	50.95	protein_coding	9155
0.0092013	0.042	387.25	600.48	388.16	340.71	361.51	218291_at	(4, 2), (5, 2)	ENSG00000116586	late endosomal/lysosomal adaptor, MAPK and MTOR activator 2 [Source:HGNC Symbol;Acc:HGNC:29796]	chr1	156054782	156058506	1	q22	LAMTOR2	50.95	protein_coding	1404
0.004179	0.0242	420.29	218.11	199.02	197.93	183.81	201516_at	(3, 1), (4, 1), (5, 1)	ENSG00000116649	spermidine synthase [Source:HGNC Symbol;Acc:HGNC:11296]	chr1	11054584	11060020	-1	p36.22	SRM	59.85	protein_coding	1894
9.1e-05	0.0014	259.15	516.23	504.13	372.21	280.87	201363_s_at	(5, 2), (5, 3)	ENSG00000116679	influenza virus NS1A binding protein [Source:HGNC Symbol;Acc:HGNC:16951]	chr1	185296388	185317273	-1	q25.3	IVNS1ABP	37.25	protein_coding	7873
0.0001278	0.00181	319.44	697.47	565.55	440.9	330.3	201362_at	(5, 2), (5, 3)	ENSG00000116679	influenza virus NS1A binding protein [Source:HGNC Symbol;Acc:HGNC:16951]	chr1	185296388	185317273	-1	q25.3	IVNS1ABP	37.25	protein_coding	7873
0.0092138	0.042	638.43	1164.37	1077.07	864.53	698.17	206245_s_at	(5, 2)	ENSG00000116679	influenza virus NS1A binding protein [Source:HGNC Symbol;Acc:HGNC:16951]	chr1	185296388	185317273	-1	q25.3	IVNS1ABP	37.25	protein_coding	7873
< 1e-07	< 1e-07	32.18	273.26	57.89	38.58	34.52	217127_at	(1, 2), (3, 2), (4, 2), (5, 2)	ENSG00000116761	cystathionine gamma-lyase [Source:HGNC Symbol;Acc:HGNC:2501]	chr1	70411218	70439851	1	p31.1	CTH	39.51	protein_coding	2414
< 1e-07	< 1e-07	16.92	96.34	31.25	19.95	18.19	206085_s_at	(1, 2), (3, 2), (4, 2), (5, 2), (5, 3)	ENSG00000116761	cystathionine gamma-lyase [Source:HGNC Symbol;Acc:HGNC:2501]	chr1	70411218	70439851	1	p31.1	CTH	39.51	protein_coding	2414
0.0038629	0.0229	63.12	37.8	49.65	81.7	29.54	221648_s_at	(5, 4)	ENSG00000116771	agmatinase [Source:HGNC Symbol;Acc:HGNC:18407]	chr1	15571699	15585051	-1	p36.21	AGMAT	49.29	protein_coding	3095
0.0001396	0.00193	795.14	1260.29	620.18	874.54	482.22	202950_at	(5, 2), (5, 4)	ENSG00000116791	crystallin zeta [Source:HGNC Symbol;Acc:HGNC:2419]	chr1	74705482	74733408	-1	p31.1	CRYZ	39.61	protein_coding	4085
0.0008379	0.00752	83.9	214.45	133.43	252.8	115.01	211744_s_at	(1, 4), (5, 4)	ENSG00000116815	CD58 molecule [Source:HGNC Symbol;Acc:HGNC:1688]	chr1	116514534	116571039	-1	p13.1	CD58	41.62	protein_coding	1784
0.0007344	0.00684	51.64	116.41	77.83	145.09	64.37	216942_s_at	(1, 4), (5, 4)	ENSG00000116815	CD58 molecule [Source:HGNC Symbol;Acc:HGNC:1688]	chr1	116514534	116571039	-1	p13.1	CD58	41.62	protein_coding	1784
0.0006747	0.00645	112.99	284.49	176.57	373.8	158.22	205173_x_at	(1, 4), (5, 4)	ENSG00000116815	CD58 molecule [Source:HGNC Symbol;Acc:HGNC:1688]	chr1	116514534	116571039	-1	p13.1	CD58	41.62	protein_coding	1784
0.0005758	0.0057	823.77	866.92	859.99	510.36	582.96	222988_s_at	(4, 2), (5, 2), (4, 3), (5, 3)	ENSG00000116857	transmembrane protein 9 [Source:HGNC Symbol;Acc:HGNC:18823]	chr1	201134772	201171574	-1	q32.1	TMEM9	48.53	protein_coding	3919
0.0064635	0.0328	537.79	561.2	551.6	329.96	402.08	222987_s_at	(4, 2), (4, 3)	ENSG00000116857	transmembrane protein 9 [Source:HGNC Symbol;Acc:HGNC:18823]	chr1	201134772	201171574	-1	q32.1	TMEM9	48.53	protein_coding	3919
0.0084648	0.0397	192.9	116.88	148.99	128.36	184.97	217943_s_at	(2, 5)	ENSG00000116871	MAP7 domain containing 1 [Source:HGNC Symbol;Acc:HGNC:25514]	chr1	36155579	36180849	1	p34.3	MAP7D1	54.66	protein_coding	5271
0.0012373	0.00994	216.14	228.55	219.77	221.4	108.29	202007_at	(5, 3), (5, 4)	ENSG00000116962	nidogen 1 [Source:HGNC Symbol;Acc:HGNC:7821]	chr1	235975830	236065109	-1	q42.3	NID1	44.97	protein_coding	5811
0.0019138	0.0137	85.15	79.82	72.74	74.65	45.5	202008_s_at		ENSG00000116962	nidogen 1 [Source:HGNC Symbol;Acc:HGNC:7821]	chr1	235975830	236065109	-1	q42.3	NID1	44.97	protein_coding	5811
0.0019261	0.0137	113.03	61.7	73.33	55.06	146.59	214058_at	(4, 5)	ENSG00000116990	MYCL proto-oncogene, bHLH transcription factor [Source:HGNC Symbol;Acc:HGNC:7555]	chr1	39895426	39902256	-1	p34.2	MYCL	53.68	protein_coding	5063
5.9e-06	0.000166	20.62	22.35	15.98	13.72	57.96	230482_at	(3, 5), (4, 5)	ENSG00000117069	ST6 N-acetylgalactosaminide alpha-2,6-sialyltransferase 5 [Source:HGNC Symbol;Acc:HGNC:19342]	chr1	76867480	77067546	1	p31.1	ST6GALNAC5	39.92	protein_coding	6059
3e-07	1.49e-05	17.25	13.85	11.28	7.62	77.91	220979_s_at	(2, 5), (3, 5), (4, 5)	ENSG00000117069	ST6 N-acetylgalactosaminide alpha-2,6-sialyltransferase 5 [Source:HGNC Symbol;Acc:HGNC:19342]	chr1	76867480	77067546	1	p31.1	ST6GALNAC5	39.92	protein_coding	6059
0.0044608	0.0254	44.17	78.09	58.96	45.82	89.84	204118_at	(4, 5)	ENSG00000117091	CD48 molecule [Source:HGNC Symbol;Acc:HGNC:1683]	chr1	160678746	160711831	-1	q23.3	CD48	42.19	protein_coding	3254
0.0002154	0.00269	466.16	417.65	430.51	793.09	408.51	209340_at	(2, 4), (3, 4), (5, 4)	ENSG00000117143	UDP-N-acetylglucosamine pyrophosphorylase 1 [Source:HGNC Symbol;Acc:HGNC:12457]	chr1	162561506	162599842	1	q23.3	UAP1	39.68	protein_coding	3437
0.0084382	0.0396	221.87	92.57	197.51	148.61	183.26	203016_s_at	(2, 1), (2, 3), (2, 5)	ENSG00000117155	SSX family member 2 interacting protein [Source:HGNC Symbol;Acc:HGNC:16509]	chr1	84643706	84690803	-1	p22.3	SSX2IP	37.23	protein_coding	8563
0.0066008	0.0333	40.04	22.91	52.43	35.29	43.93	210871_x_at	(2, 3), (2, 5)	ENSG00000117155	SSX family member 2 interacting protein [Source:HGNC Symbol;Acc:HGNC:16509]	chr1	84643706	84690803	-1	p22.3	SSX2IP	37.23	protein_coding	8563
2.01e-05	0.000436	338.09	513.68	227.45	313.16	796.32	231577_s_at	(3, 5), (4, 5)	ENSG00000117228	guanylate binding protein 1 [Source:HGNC Symbol;Acc:HGNC:4182]	chr1	89051882	89065360	-1	p22.2	GBP1	37.94	protein_coding	6103
4.39e-05	0.000808	23.98	36.04	21.29	18.44	52.27	231578_at	(3, 5), (4, 5)	ENSG00000117228	guanylate binding protein 1 [Source:HGNC Symbol;Acc:HGNC:4182]	chr1	89051882	89065360	-1	p22.2	GBP1	37.94	protein_coding	6103
1.22e-05	0.000297	220.92	365.02	158.3	227.86	566.09	202269_x_at	(3, 5), (4, 5)	ENSG00000117228	guanylate binding protein 1 [Source:HGNC Symbol;Acc:HGNC:4182]	chr1	89051882	89065360	-1	p22.2	GBP1	37.94	protein_coding	6103
0.0001535	0.00207	204.8	374	196.48	230.77	575.04	202270_at	(3, 5), (4, 5)	ENSG00000117228	guanylate binding protein 1 [Source:HGNC Symbol;Acc:HGNC:4182]	chr1	89051882	89065360	-1	p22.2	GBP1	37.94	protein_coding	6103
1.81e-05	0.000404	237.51	385.14	219.38	540.81	202.88	202528_at	(5, 2), (3, 4), (5, 4)	ENSG00000117308	UDP-galactose-4-epimerase [Source:HGNC Symbol;Acc:HGNC:4116]	chr1	23795599	23800781	-1	p36.11	GALE	60.06	protein_coding	3955
< 1e-07	5.91e-06	86.6	1625.89	461.31	1150.17	226.71	209114_at	(1, 2), (1, 4), (5, 2), (5, 4)	ENSG00000117472	tetraspanin 1 [Source:HGNC Symbol;Acc:HGNC:20657]	chr1	46175073	46185962	1	p34.1	TSPAN1	50.7	protein_coding	2370
0.0098844	0.0443	34.03	54.24	49.72	70	49.93	203840_at	(1, 4), (5, 4)	ENSG00000117475	basic leucine zipper nuclear factor 1 [Source:HGNC Symbol;Acc:HGNC:1065]	chr1	169367970	169396540	1	q24.2	BLZF1	35.78	protein_coding	3820
0.0007264	0.00678	97.75	96.21	97.68	156.82	61.61	209681_at	(5, 4)	ENSG00000117479	solute carrier family 19 member 2 [Source:HGNC Symbol;Acc:HGNC:10938]	chr1	169463909	169485944	-1	q24.2	SLC19A2	38.65	protein_coding	4364
0.0032156	0.0199	47.24	117.52	80.92	64.07	83.37	226351_at	(1, 2), (1, 5), (4, 2)	ENSG00000117481	NOP2/Sun RNA methyltransferase 4 [Source:HGNC Symbol;Acc:HGNC:31802]	chr1	46340789	46365152	1	p33	NSUN4	47.09	protein_coding	7856
2.46e-05	0.000515	837.18	1136.94	764.24	848.85	554.46	202194_at	(5, 2), (5, 4)	ENSG00000117500	transmembrane p24 trafficking protein 5 [Source:HGNC Symbol;Acc:HGNC:24251]	chr1	93149742	93180516	-1	p22.1	TMED5	38	protein_coding	9211
1.42e-05	0.000333	120.31	146.17	83.33	115.22	60.82	242263_at	(5, 2), (5, 4)	ENSG00000117500	transmembrane p24 trafficking protein 5 [Source:HGNC Symbol;Acc:HGNC:24251]	chr1	93149742	93180516	-1	p22.1	TMED5	38	protein_coding	9211
9e-07	3.73e-05	73.07	223.45	100.51	99.04	67.03	202195_s_at	(1, 2), (3, 2), (4, 2), (5, 2)	ENSG00000117500	transmembrane p24 trafficking protein 5 [Source:HGNC Symbol;Acc:HGNC:24251]	chr1	93149742	93180516	-1	p22.1	TMED5	38	protein_coding	9211
5e-07	2.26e-05	121.98	205.08	93.05	368.7	71.47	204363_at	(5, 2), (3, 4), (5, 4)	ENSG00000117525	coagulation factor III, tissue factor [Source:HGNC Symbol;Acc:HGNC:3541]	chr1	94529173	94541759	-1	p21.3	F3	43.36	protein_coding	2886
1.69e-05	0.000383	54.36	69.88	83.9	112.62	46.34	1554878_a_at	(5, 3), (5, 4)	ENSG00000117528	ATP binding cassette subfamily D member 3 [Source:HGNC Symbol;Acc:HGNC:67]	chr1	94418389	94518666	1	p21.3	ABCD3	37.07	protein_coding	7655
< 1e-07	< 1e-07	535.18	662.58	586.01	1024.59	395.03	202850_at	(5, 2), (3, 4), (5, 3), (5, 4)	ENSG00000117528	ATP binding cassette subfamily D member 3 [Source:HGNC Symbol;Acc:HGNC:67]	chr1	94418389	94518666	1	p21.3	ABCD3	37.07	protein_coding	7655
0.0001318	0.00185	1642.27	1001.95	1173.84	1196.35	1577.12	200845_s_at	(2, 5), (3, 5)	ENSG00000117592	peroxiredoxin 6 [Source:HGNC Symbol;Acc:HGNC:16753]	chr1	173477330	173488815	1	q25.1	PRDX6	40.51	protein_coding	2311
0.0051265	0.028	29.44	18.64	38.58	43.66	29.87	229064_s_at	(2, 3), (2, 4)	ENSG00000117602	RCAN family member 3 [Source:HGNC Symbol;Acc:HGNC:3042]	chr1	24502351	24541040	1	p36.11	RCAN3	42.26	protein_coding	7138
4.67e-05	0.000844	305.77	54.92	345.49	292.48	238.4	226272_at	(2, 1), (2, 3), (2, 4), (2, 5)	ENSG00000117602	RCAN family member 3 [Source:HGNC Symbol;Acc:HGNC:3042]	chr1	24502351	24541040	1	p36.11	RCAN3	42.26	protein_coding	7138
0.0002719	0.00322	227.22	468.62	401.04	582.86	291.33	206770_s_at	(1, 4), (5, 4)	ENSG00000117620	solute carrier family 35 member A3 [Source:HGNC Symbol;Acc:HGNC:11023]	chr1	99969351	100035634	1	p21.2	SLC35A3	37.43	protein_coding	18235
< 1e-07	5.91e-06	323.04	279.05	334.35	241.68	648.39	200787_s_at	(2, 5), (3, 5), (4, 5)	ENSG00000162734	proliferation and apoptosis adaptor protein 15 [Source:HGNC Symbol;Acc:HGNC:8822]	chr1	160205380	160215376	1	q23.2	PEA15	51.75	protein_coding	2763
0.0072808	0.0357	204.21	82.21	106.11	91.84	84.74	214075_at	(2, 1), (4, 1), (5, 1)	ENSG00000117691	neudesin neurotrophic factor [Source:HGNC Symbol;Acc:HGNC:30384]	chr1	212432920	212446379	1	q32.3	NENF	47.62	protein_coding	1264
1e-07	5.91e-06	84.17	26.97	97.58	35.81	20.83	228656_at	(5, 1), (2, 3), (4, 3), (5, 3)	ENSG00000117707	prospero homeobox 1 [Source:HGNC Symbol;Acc:HGNC:9459]	chr1	213983181	214041510	1	q32.3	PROX1	41.17	protein_coding	8936
0.0010585	0.00888	230.96	194.84	234.99	332.79	188.83	212111_at	(2, 4), (5, 4)	ENSG00000117758	syntaxin 12 [Source:HGNC Symbol;Acc:HGNC:11430]	chr1	27773219	27824443	1	p35.3	STX12	41.39	protein_coding	3801
0.0022878	0.0155	334.87	416.64	380.17	510.91	315.76	212112_s_at	(5, 4)	ENSG00000117758	syntaxin 12 [Source:HGNC Symbol;Acc:HGNC:11430]	chr1	27773219	27824443	1	p35.3	STX12	41.39	protein_coding	3801
< 1e-07	< 1e-07	60.26	67.71	112.38	202.71	57.14	221636_s_at	(1, 4), (2, 4), (5, 3), (5, 4)	ENSG00000117791	mitochondrial amidoxime reducing component 2 [Source:HGNC Symbol;Acc:HGNC:26064]	chr1	220748225	220784815	1	q41	MTARC2	44.02	protein_coding	2597
1.3e-06	5.01e-05	26.39	28.74	54.17	100.84	23.7	227417_at	(1, 4), (2, 4), (5, 3), (5, 4)	ENSG00000117791	mitochondrial amidoxime reducing component 2 [Source:HGNC Symbol;Acc:HGNC:26064]	chr1	220748225	220784815	1	q41	MTARC2	44.02	protein_coding	2597
< 1e-07	< 1e-07	31.49	40.69	67.47	106.19	36.03	219527_at	(1, 4), (2, 4), (5, 3), (5, 4)	ENSG00000117791	mitochondrial amidoxime reducing component 2 [Source:HGNC Symbol;Acc:HGNC:26064]	chr1	220748225	220784815	1	q41	MTARC2	44.02	protein_coding	2597
0.0019524	0.0139	23.16	51.59	18.45	24.78	22.53	203591_s_at	(3, 2), (4, 2), (5, 2)	ENSG00000119535	colony stimulating factor 3 receptor [Source:HGNC Symbol;Acc:HGNC:2439]	chr1	36466043	36483278	-1	p34.3	CSF3R	53.16	protein_coding	8429
0.0013702	0.0107	106.57	204.74	86.78	101.78	103.33	1553297_a_at	(3, 2), (4, 2), (5, 2)	ENSG00000119535	colony stimulating factor 3 receptor [Source:HGNC Symbol;Acc:HGNC:2439]	chr1	36466043	36483278	-1	p34.3	CSF3R	53.16	protein_coding	8429
0.0093254	0.0424	41.38	42.24	39.51	26.25	47.21	1554271_a_at	(4, 5)	ENSG00000120334	centromere protein L [Source:HGNC Symbol;Acc:HGNC:17879]	chr1	173799550	173824883	-1	q25.1	CENPL	40.79	protein_coding	5165
0.0056439	0.0298	299.72	234.41	203.08	193.03	287.54	222158_s_at	(4, 5)	ENSG00000121644	desumoylating isopeptidase 2 [Source:HGNC Symbol;Acc:HGNC:24264]	chr1	244653103	244709033	1	q44	DESI2	40.31	protein_coding	4936
6.94e-05	0.00114	133.43	150.94	122.95	310.88	102.22	225536_at	(3, 4), (5, 4)	ENSG00000121900	transmembrane protein 54 [Source:HGNC Symbol;Acc:HGNC:24143]	chr1	32894594	32901438	-1	p35.1	TMEM54	57.33	protein_coding	1417
0.0078898	0.0377	430.5	139.8	589.06	231.65	358.55	202709_at	(2, 3), (2, 5)	ENSG00000122176	fibromodulin [Source:HGNC Symbol;Acc:HGNC:3774]	chr1	203340628	203351758	-1	q32.1	FMOD	50.22	protein_coding	3034
0.0064443	0.0328	149.39	130.27	122.11	154	93.35	227476_at	(5, 4)	ENSG00000123684	lysophosphatidylglycerol acyltransferase 1 [Source:HGNC Symbol;Acc:HGNC:28985]	chr1	211743457	211830763	-1	q32.3	LPGAT1	38.29	protein_coding	8790
5.77e-05	0.000997	96.11	132.13	56.28	84	48.83	1555058_a_at	(3, 2), (5, 2), (5, 4)	ENSG00000123684	lysophosphatidylglycerol acyltransferase 1 [Source:HGNC Symbol;Acc:HGNC:28985]	chr1	211743457	211830763	-1	q32.3	LPGAT1	38.29	protein_coding	8790
0.0012473	0.01	273.16	392.09	276.62	388.22	195.45	202651_at	(5, 2), (5, 4)	ENSG00000123684	lysophosphatidylglycerol acyltransferase 1 [Source:HGNC Symbol;Acc:HGNC:28985]	chr1	211743457	211830763	-1	q32.3	LPGAT1	38.29	protein_coding	8790
0.0003582	0.00399	23.97	37.41	65.75	76.61	37.13	226733_at	(1, 3), (1, 4), (5, 3), (5, 4)	ENSG00000123836	6-phosphofructo-2-kinase/fructose-2,6-biphosphatase 2 [Source:HGNC Symbol;Acc:HGNC:8873]	chr1	207034366	207081024	1	q32.1	PFKFB2	42.36	protein_coding	10176
0.0040318	0.0236	42.63	14.61	24.43	37.53	22.87	235782_at	(2, 1), (2, 4), (5, 4)	ENSG00000126070	argonaute RISC catalytic component 3 [Source:HGNC Symbol;Acc:HGNC:18421]	chr1	35930718	36072500	1	p34.3	2023-08-03	38.75	protein_coding	21153
3.19e-05	0.000636	60.5	98.75	71.71	110.74	69.5	208009_s_at	(1, 4), (5, 2), (3, 4), (5, 4)	ENSG00000130762	Rho guanine nucleotide exchange factor 16 [Source:HGNC Symbol;Acc:HGNC:15515]	chr1	3454665	3481113	1	p36.32	ARHGEF16	62.91	protein_coding	5324
0.002144	0.0148	83.09	156.39	95.57	133.36	92.09	223196_s_at	(5, 2), (5, 4)	ENSG00000130766	sestrin 2 [Source:HGNC Symbol;Acc:HGNC:20746]	chr1	28259518	28282491	1	p35.3	SESN2	50.07	protein_coding	3462
0.0053832	0.0289	68.16	160.81	54.46	43.43	104.12	210785_s_at	(4, 2), (4, 5)	ENSG00000130775	thymocyte selection associated family member 2 [Source:HGNC Symbol;Acc:HGNC:16839]	chr1	27872543	27886685	1	p35.3	THEMIS2	54.04	protein_coding	4621
0.0016054	0.0121	111.22	318.87	244.87	172.76	173.64	203035_s_at	(1, 2), (1, 3), (4, 2), (5, 2)	ENSG00000131788	protein inhibitor of activated STAT 3 [Source:HGNC Symbol;Acc:HGNC:16861]	chr1	145848522	145859836	-1	q21.1	PIAS3	52.28	protein_coding	4806
0.0052785	0.0285	1199.53	680.36	906.93	990.52	1088.35	223716_s_at	(2, 5)	ENSG00000132485	zinc finger RANBP2-type containing 2 [Source:HGNC Symbol;Acc:HGNC:13058]	chr1	71063291	71081289	-1	p31.1	ZRANB2	34.19	protein_coding	4985
0.0046498	0.0261	494.09	315.55	386.65	385.09	493.03	223016_x_at	(2, 5)	ENSG00000132485	zinc finger RANBP2-type containing 2 [Source:HGNC Symbol;Acc:HGNC:13058]	chr1	71063291	71081289	-1	p31.1	ZRANB2	34.19	protein_coding	4985
0.0061697	0.0318	67.45	305.28	614.77	989.14	252.87	218186_at	(1, 4), (5, 4)	ENSG00000132698	RAB25, member RAS oncogene family [Source:HGNC Symbol;Acc:HGNC:18238]	chr1	156061160	156070504	1	q22	RAB25	51.24	protein_coding	1689
0.0043237	0.0249	92.31	86.16	73.44	91.91	113.23	202250_s_at	(3, 5)	ENSG00000132716	DDB1 and CUL4 associated factor 8 [Source:HGNC Symbol;Acc:HGNC:24891]	chr1	160215715	160262549	-1	q23.2	DCAF8	42.25	protein_coding	7605
0.0005388	0.00542	22.46	15.44	38.91	22.77	20.51	1564339_a_at	(2, 3), (5, 3)	ENSG00000133019	cholinergic receptor muscarinic 3 [Source:HGNC Symbol;Acc:HGNC:1952]	chr1	239386565	239915452	1	q43	CHRM3	38.67	protein_coding	15173
0.0002689	0.0032	15.79	12.91	36.22	18.84	16.71	1553705_a_at	(1, 3), (2, 3), (4, 3), (5, 3)	ENSG00000133019	cholinergic receptor muscarinic 3 [Source:HGNC Symbol;Acc:HGNC:1952]	chr1	239386565	239915452	1	q43	CHRM3	38.67	protein_coding	15173
3.45e-05	0.000673	22.33	14.46	45.15	22.7	17	242488_at	(2, 3), (4, 3), (5, 3)	ENSG00000133019	cholinergic receptor muscarinic 3 [Source:HGNC Symbol;Acc:HGNC:1952]	chr1	239386565	239915452	1	q43	CHRM3	38.67	protein_coding	15173
9.83e-05	0.00147	18.74	12.68	47.01	18.9	16.33	214596_at	(2, 3), (4, 3), (5, 3)	ENSG00000133019	cholinergic receptor muscarinic 3 [Source:HGNC Symbol;Acc:HGNC:1952]	chr1	239386565	239915452	1	q43	CHRM3	38.67	protein_coding	15173
< 1e-07	< 1e-07	39.79	73.09	125.68	35.74	777.14	209395_at	(1, 5), (2, 5), (3, 5), (4, 5)	ENSG00000133048	chitinase 3 like 1 [Source:HGNC Symbol;Acc:HGNC:1932]	chr1	203178931	203186704	-1	q32.1	CHI3L1	54.8	protein_coding	3363
< 1e-07	< 1e-07	45.24	63.58	111.59	37.19	639.17	209396_s_at	(1, 5), (2, 5), (3, 5), (4, 5)	ENSG00000133048	chitinase 3 like 1 [Source:HGNC Symbol;Acc:HGNC:1932]	chr1	203178931	203186704	-1	q32.1	CHI3L1	54.8	protein_coding	3363
0.002069	0.0145	48.9	27.27	45.66	26.94	77.06	227819_at	(2, 5), (4, 5)	ENSG00000133067	leucine rich repeat containing G protein-coupled receptor 6 [Source:HGNC Symbol;Acc:HGNC:19719]	chr1	202193799	202319781	1	q32.1	LGR6	49.62	protein_coding	4685
0.004468	0.0254	53.14	53.55	44.13	39.05	70.54	209589_s_at	(4, 5)	ENSG00000133216	EPH receptor B2 [Source:HGNC Symbol;Acc:HGNC:3393]	chr1	22710839	22921500	1	p36.12	EPHB2	51.95	protein_coding	12516
2e-07	1.08e-05	393.93	1348.61	316.99	407.28	149.63	202554_s_at	(3, 2), (5, 2), (5, 4)	ENSG00000134202	glutathione S-transferase mu 3 [Source:HGNC Symbol;Acc:HGNC:4635]	chr1	109733932	109741038	-1	p13.3	GSTM3	47.16	protein_coding	4750
0.0002249	0.00279	117.14	27.46	61.58	189.18	26.1	204607_at	(2, 4), (5, 4)	ENSG00000134240	3-hydroxy-3-methylglutaryl-CoA synthase 2 [Source:HGNC Symbol;Acc:HGNC:5008]	chr1	119748002	119768905	-1	p12	HMGCS2	41.87	protein_coding	2565
0.0009612	0.00832	385.4	271.88	468.24	542.24	629.65	224818_at	(2, 5)	ENSG00000134243	sortilin 1 [Source:HGNC Symbol;Acc:HGNC:11186]	chr1	109309568	109397918	-1	p13.3	SORT1	42.26	protein_coding	9127
0.005262	0.0284	22.39	19.86	32.71	28.61	42.65	212797_at	(2, 5)	ENSG00000134243	sortilin 1 [Source:HGNC Symbol;Acc:HGNC:11186]	chr1	109309568	109397918	-1	p13.3	SORT1	42.26	protein_coding	9127
0.0014753	0.0113	124.56	148.99	164.47	145.42	254.5	212807_s_at	(4, 5)	ENSG00000134243	sortilin 1 [Source:HGNC Symbol;Acc:HGNC:11186]	chr1	109309568	109397918	-1	p13.3	SORT1	42.26	protein_coding	9127
0.0007168	0.00672	51.08	868.08	138.5	83.35	378.37	219768_at	(1, 2), (4, 2), (4, 5)	ENSG00000134258	V-set domain containing T cell activation inhibitor 1 [Source:HGNC Symbol;Acc:HGNC:28873]	chr1	117143587	117210960	-1	p12	VTCN1	42.41	protein_coding	3027
0.0030652	0.0192	48.14	54.32	88.89	45.02	52.07	227584_at	(4, 3), (5, 3)	ENSG00000134369	neuron navigator 1 [Source:HGNC Symbol;Acc:HGNC:15989]	chr1	201622885	201826969	1	q32.1	NAV1	47.44	protein_coding	22453
0.0086599	0.0403	51.83	102.08	116.96	55.48	64.49	224773_at	(4, 3), (5, 3)	ENSG00000134369	neuron navigator 1 [Source:HGNC Symbol;Acc:HGNC:15989]	chr1	201622885	201826969	1	q32.1	NAV1	47.44	protein_coding	22453
0.0080869	0.0383	341.36	232.34	149.2	268.67	177.79	227930_at	(3, 1)	ENSG00000134698	argonaute RISC component 4 [Source:HGNC Symbol;Acc:HGNC:18424]	chr1	35808016	35857890	1	p34.3	2023-08-04	41.67	protein_coding	7423
0.0082297	0.0388	132.22	76.4	102.42	95.06	114.45	235819_at	(2, 1), (2, 5)	ENSG00000134717	basic transcription factor 3 like 4 [Source:HGNC Symbol;Acc:HGNC:30547]	chr1	52056199	52090716	1	p32.3	BTF3L4	41.13	protein_coding	5948
0.0030719	0.0192	524.59	281.8	374.69	294.48	417.81	225976_at	(2, 1), (2, 5), (4, 5)	ENSG00000134717	basic transcription factor 3 like 4 [Source:HGNC Symbol;Acc:HGNC:30547]	chr1	52056199	52090716	1	p32.3	BTF3L4	41.13	protein_coding	5948
0.0001746	0.0023	70.48	21.7	28.29	34.84	16.87	202834_at	(5, 1), (5, 4)	ENSG00000135744	angiotensinogen [Source:HGNC Symbol;Acc:HGNC:333]	chr1	230690776	230745576	-1	q42.2	AGT	46.85	protein_coding	12703
0.0037535	0.0224	9.97	23.62	25.43	38.21	20.3	1566465_at	(1, 4), (5, 4)	ENSG00000135750	potassium two pore domain channel subfamily K member 1 [Source:HGNC Symbol;Acc:HGNC:6272]	chr1	233614106	233672514	1	q42.2	KCNK1	42.07	protein_coding	3527
0.001099	0.00913	95.64	243.38	477.42	506.37	241.34	204679_at	(1, 3), (1, 4), (5, 4)	ENSG00000135750	potassium two pore domain channel subfamily K member 1 [Source:HGNC Symbol;Acc:HGNC:6272]	chr1	233614106	233672514	1	q42.2	KCNK1	42.07	protein_coding	3527
0.0008497	0.00759	45.14	88.36	174.63	183.77	101.35	204678_s_at	(1, 3), (1, 4), (5, 4)	ENSG00000135750	potassium two pore domain channel subfamily K member 1 [Source:HGNC Symbol;Acc:HGNC:6272]	chr1	233614106	233672514	1	q42.2	KCNK1	42.07	protein_coding	3527
0.0066786	0.0336	22.26	26.17	30.04	77.12	30.61	208063_s_at	(1, 4), (2, 4), (3, 4), (5, 4)	ENSG00000135773	calpain 9 [Source:HGNC Symbol;Acc:HGNC:1486]	chr1	230747384	230802003	1	q42.2	CAPN9	47.85	protein_coding	2593
1.9e-05	0.000416	36.73	96.69	41.8	113.95	42.16	229285_at	(1, 4), (3, 2), (5, 2), (3, 4), (5, 4)	ENSG00000135828	ribonuclease L [Source:HGNC Symbol;Acc:HGNC:10050]	chr1	182573634	182589256	-1	q25.3	RNASEL	41.52	protein_coding	6125
1.2e-06	4.72e-05	347.3	1715.41	406.21	314.31	505.19	200770_s_at	(1, 2), (3, 2), (4, 2), (5, 2)	ENSG00000135862	laminin subunit gamma 1 [Source:HGNC Symbol;Acc:HGNC:6492]	chr1	183023420	183145592	1	q25.3	LAMC1	40.09	protein_coding	8446
0.0030536	0.0192	946.88	1922.18	841.89	838.52	841.4	200771_at	(3, 2), (4, 2), (5, 2)	ENSG00000135862	laminin subunit gamma 1 [Source:HGNC Symbol;Acc:HGNC:6492]	chr1	183023420	183145592	1	q25.3	LAMC1	40.09	protein_coding	8446
0.0001199	0.00173	210	782.66	291.1	361.93	637.75	203910_at	(1, 2), (1, 5), (3, 2), (3, 5)	ENSG00000137962	Rho GTPase activating protein 29 [Source:HGNC Symbol;Acc:HGNC:30207]	chr1	94148988	94275068	-1	p22.1	ARHGAP29	38.07	protein_coding	18370
0.0007496	0.00692	32.03	43.08	32.47	35.86	58.85	204429_s_at	(3, 5), (4, 5)	ENSG00000142583	solute carrier family 2 member 5 [Source:HGNC Symbol;Acc:HGNC:11010]	chr1	9035106	9088478	-1	p36.23	SLC2A5	47.92	protein_coding	6632
0.0001733	0.00228	30.46	37.95	20.77	21.68	53.88	204430_s_at	(3, 5), (4, 5)	ENSG00000142583	solute carrier family 2 member 5 [Source:HGNC Symbol;Acc:HGNC:11010]	chr1	9035106	9088478	-1	p36.23	SLC2A5	47.92	protein_coding	6632
6.63e-05	0.00111	85.76	158.76	96.7	186.17	99.17	222483_at	(1, 4), (5, 2), (3, 4), (5, 4)	ENSG00000142634	EF-hand domain family member D2 [Source:HGNC Symbol;Acc:HGNC:28670]	chr1	15409888	15430339	1	p36.21	EFHD2	56.77	protein_coding	2534
0.0001267	0.0018	189.82	211.75	159.96	384.36	171.17	217992_s_at	(3, 4), (5, 4)	ENSG00000142634	EF-hand domain family member D2 [Source:HGNC Symbol;Acc:HGNC:28670]	chr1	15409888	15430339	1	p36.21	EFHD2	56.77	protein_coding	2534
3.8e-06	0.000119	39.63	343.08	124.51	391.15	172.99	227134_at	(1, 2), (1, 4), (1, 5), (3, 2), (3, 4), (5, 4)	ENSG00000142765	synaptotagmin like 1 [Source:HGNC Symbol;Acc:HGNC:15584]	chr1	27342020	27353937	1	p36.11	SYTL1	58.24	protein_coding	5584
1.25e-05	0.000302	377.42	238.22	472.38	685.62	233.68	202741_at	(2, 4), (5, 3), (5, 4)	ENSG00000142875	protein kinase cAMP-activated catalytic subunit beta [Source:HGNC Symbol;Acc:HGNC:9381]	chr1	84078062	84238498	1	p31.1	PRKACB	34.7	protein_coding	6730
4.99e-05	0.000889	80.39	44.74	112.76	156.07	52.07	202742_s_at	(2, 4), (5, 3), (5, 4)	ENSG00000142875	protein kinase cAMP-activated catalytic subunit beta [Source:HGNC Symbol;Acc:HGNC:9381]	chr1	84078062	84238498	1	p31.1	PRKACB	34.7	protein_coding	6730
0.0088345	0.0408	136.59	299.53	212.96	169.73	145.3	209707_at	(5, 2)	ENSG00000142892	phosphatidylinositol glycan anchor biosynthesis class K [Source:HGNC Symbol;Acc:HGNC:8965]	chr1	77088989	77219430	-1	p31.1	PIGK	35.84	protein_coding	5514
0.0070333	0.0348	22.66	22.48	41.03	33.63	142.47	210096_at		ENSG00000142973	cytochrome P450 family 4 subfamily B member 1 [Source:HGNC Symbol;Acc:HGNC:2644]	chr1	46757838	46819413	1	p33	CYP4B1	43.78	protein_coding	3466
8.18e-05	0.00129	22.83	74.06	109.56	43.83	34.42	230822_at	(1, 3), (5, 3)	ENSG00000143001	transmembrane protein 61 [Source:HGNC Symbol;Acc:HGNC:27296]	chr1	54980628	54992288	1	p32.3	TMEM61	53.31	protein_coding	1256
0.0045129	0.0255	257.01	371.11	456.35	500.76	707.24	209205_s_at	(1, 5)	ENSG00000143013	LIM domain only 4 [Source:HGNC Symbol;Acc:HGNC:6644]	chr1	87328880	87348923	1	p22.3	LMO4	41.87	protein_coding	5421
< 1e-07	< 1e-07	42.62	194.62	63.51	255.37	37.59	228221_at	(1, 2), (1, 4), (5, 2), (3, 4), (5, 4)	ENSG00000143036	solute carrier family 44 member 3 [Source:HGNC Symbol;Acc:HGNC:28689]	chr1	94820342	94895246	1	p21.3	SLC44A3	43.92	protein_coding	2869
6e-07	2.63e-05	130.4	439.36	118.62	137.55	98.07	202421_at	(1, 2), (3, 2), (4, 2), (5, 2)	ENSG00000143061	immunoglobulin superfamily member 3 [Source:HGNC Symbol;Acc:HGNC:5950]	chr1	116574399	116667755	-1	p13.1	IGSF3	46.14	protein_coding	7400
0.0069139	0.0344	105.22	85.4	111.95	83.29	58.72	227080_at	(5, 3)	ENSG00000143067	zinc finger protein 697 [Source:HGNC Symbol;Acc:HGNC:32034]	chr1	119619377	119648266	-1	p12	ZNF697	44.79	protein_coding	5579
0.0017719	0.0129	70.86	66.91	40.31	47.75	92.51	228532_at	(3, 5), (4, 5)	ENSG00000143110	chromosome 1 open reading frame 162 [Source:HGNC Symbol;Acc:HGNC:28344]	chr1	111473792	111478512	1	p13.2	C1orf162	41.83	protein_coding	2768
5e-07	2.26e-05	158.14	188.23	197.18	75.94	265.49	36499_at	(4, 2), (4, 3), (4, 5)	ENSG00000143126	cadherin EGF LAG seven-pass G-type receptor 2 [Source:HGNC Symbol;Acc:HGNC:3231]	chr1	109249539	109275751	1	p13.3	CELSR2	60.19	protein_coding	12830
1.5e-06	5.65e-05	142.07	157.73	175.53	65.23	238.89	204029_at	(4, 2), (4, 3), (4, 5)	ENSG00000143126	cadherin EGF LAG seven-pass G-type receptor 2 [Source:HGNC Symbol;Acc:HGNC:3231]	chr1	109249539	109275751	1	p13.3	CELSR2	60.19	protein_coding	12830
0.0005041	0.00515	263.9	47.9	96.55	55.9	105.44	214104_at	(2, 1), (4, 1), (2, 5), (4, 5)	ENSG00000143147	G protein-coupled receptor 161 [Source:HGNC Symbol;Acc:HGNC:23694]	chr1	168079542	168137667	-1	q24.2	GPR161	46.83	protein_coding	11417
0.001293	0.0103	129.01	22.12	47.79	23.54	44.25	230369_at	(2, 1), (4, 1), (5, 1)	ENSG00000143147	G protein-coupled receptor 161 [Source:HGNC Symbol;Acc:HGNC:23694]	chr1	168079542	168137667	-1	q24.2	GPR161	46.83	protein_coding	11417
0.0041284	0.0241	87.23	27.92	46.86	35.3	48.65	235961_at	(2, 1), (4, 1), (2, 5)	ENSG00000143147	G protein-coupled receptor 161 [Source:HGNC Symbol;Acc:HGNC:23694]	chr1	168079542	168137667	-1	q24.2	GPR161	46.83	protein_coding	11417
0.0036707	0.022	110.43	43.92	53.61	37.68	55.62	206972_s_at	(2, 1), (4, 1), (5, 1)	ENSG00000143147	G protein-coupled receptor 161 [Source:HGNC Symbol;Acc:HGNC:23694]	chr1	168079542	168137667	-1	q24.2	GPR161	46.83	protein_coding	11417
< 1e-07	5.91e-06	683.91	3028.87	2812.42	4442.18	1396.63	201242_s_at	(1, 2), (1, 3), (1, 4), (5, 2), (5, 3), (5, 4)	ENSG00000143153	ATPase Na+/K+ transporting subunit beta 1 [Source:HGNC Symbol;Acc:HGNC:804]	chr1	169105697	169132722	1	q24.2	ATP1B1	43.48	protein_coding	2865
3e-07	1.49e-05	331.85	985.47	1162.31	1930.21	615.39	201243_s_at	(1, 2), (1, 3), (1, 4), (5, 3), (5, 4)	ENSG00000143153	ATPase Na+/K+ transporting subunit beta 1 [Source:HGNC Symbol;Acc:HGNC:804]	chr1	169105697	169132722	1	q24.2	ATP1B1	43.48	protein_coding	2865
5e-07	2.26e-05	79.52	56.52	55.27	91.93	33.06	227669_at	(5, 1), (5, 3), (5, 4)	ENSG00000143158	mitochondrial pyruvate carrier 2 [Source:HGNC Symbol;Acc:HGNC:24515]	chr1	167916675	167937072	-1	q24.2	MPC2	37.94	protein_coding	2638
1.3e-06	5.01e-05	982.1	929.13	659.89	904.51	470.72	202427_s_at	(5, 1), (5, 2), (5, 4)	ENSG00000143158	mitochondrial pyruvate carrier 2 [Source:HGNC Symbol;Acc:HGNC:24515]	chr1	167916675	167937072	-1	q24.2	MPC2	37.94	protein_coding	2638
0.0018455	0.0133	1571.65	2531.36	1578.32	2004.33	1422.65	201403_s_at	(5, 2)	ENSG00000143198	microsomal glutathione S-transferase 3 [Source:HGNC Symbol;Acc:HGNC:7064]	chr1	165631213	165661796	1	q24.1	MGST3	43.33	protein_coding	8052
0.0009112	0.00802	514.51	650.03	666.23	951.97	405.89	209071_s_at	(5, 4)	ENSG00000143248	regulator of G protein signaling 5 [Source:HGNC Symbol;Acc:HGNC:10001]	chr1	163111121	163321791	-1	q23.3	RGS5	37.67	protein_coding	6624
0.0026211	0.0171	119.2	124.74	155.18	193.47	87.73	1555725_a_at	(5, 4)	ENSG00000143248	regulator of G protein signaling 5 [Source:HGNC Symbol;Acc:HGNC:10001]	chr1	163111121	163321791	-1	q23.3	RGS5	37.67	protein_coding	6624
0.0061576	0.0318	246.2	309.88	351.08	436.44	210.16	209070_s_at	(5, 4)	ENSG00000143248	regulator of G protein signaling 5 [Source:HGNC Symbol;Acc:HGNC:10001]	chr1	163111121	163321791	-1	q23.3	RGS5	37.67	protein_coding	6624
0.0009934	0.00853	162	200.58	196.63	312.01	123.79	218353_at	(5, 4)	ENSG00000143248	regulator of G protein signaling 5 [Source:HGNC Symbol;Acc:HGNC:10001]	chr1	163111121	163321791	-1	q23.3	RGS5	37.67	protein_coding	6624
5e-07	2.26e-05	216.01	194.78	391.03	138.5	1024.54	202575_at	(2, 5), (4, 5)	ENSG00000143320	cellular retinoic acid binding protein 2 [Source:HGNC Symbol;Acc:HGNC:2339]	chr1	156699606	156705816	-1	q23.1	CRABP2	55.42	protein_coding	1082
0.004734	0.0264	135.42	58.03	170.52	79.88	173.41	226615_at	(2, 5)	ENSG00000143324	xenotropic and polytropic retrovirus receptor 1 [Source:HGNC Symbol;Acc:HGNC:12827]	chr1	180632022	180890279	1	q25.3	XPR1	36.94	protein_coding	8913
0.0039273	0.0232	103.61	142.01	113.11	79.11	136.41	210988_s_at	(4, 2), (4, 5)	ENSG00000143363	prune exopolyphosphatase 1 [Source:HGNC Symbol;Acc:HGNC:13420]	chr1	151008420	151035713	1	q21.3	PRUNE1	46.61	protein_coding	3156
0.001055	0.00886	227.75	358.79	284.87	216.8	351.44	209586_s_at	(4, 2), (4, 5)	ENSG00000143363	prune exopolyphosphatase 1 [Source:HGNC Symbol;Acc:HGNC:13420]	chr1	151008420	151035713	1	q21.3	PRUNE1	46.61	protein_coding	3156
0.000824	0.00741	11.93	73.54	36.11	55.78	33.09	228806_at	(1, 2), (1, 4), (1, 5), (5, 2)	ENSG00000143365	RAR related orphan receptor C [Source:HGNC Symbol;Acc:HGNC:10260]	chr1	151806071	151831845	-1	q21.3	RORC	53.06	protein_coding	6517
1.24e-05	0.0003	299.74	236.05	455.43	208.94	220.73	213410_at	(2, 3), (4, 3), (5, 3)	ENSG00000107938	erythroid differentiation regulatory factor 1 [Source:HGNC Symbol;Acc:HGNC:24640]	chr10	125719515	125764143	1	q26.2	EDRF1	39.09	protein_coding	7741
0.001521	0.0116	12.6	11.1	25.21	12.17	15.1	235150_at	(2, 3), (4, 3), (5, 3)	ENSG00000149212	sestrin 3 [Source:HGNC Symbol;Acc:HGNC:23060]	chr11	95165513	95232541	-1	q21	SESN3	35.27	protein_coding	10578
0.0024257	0.0162	595.62	1300.67	789.42	788.23	1059.76	200798_x_at	(1, 2), (1, 5)	ENSG00000143384	MCL1 apoptosis regulator, BCL2 family member [Source:HGNC Symbol;Acc:HGNC:6943]	chr1	150560895	150579738	-1	q21.2	MCL1	47.56	protein_coding	6222
0.0030511	0.0192	58.93	240.99	110.6	72.29	123.28	208103_s_at	(1, 2), (4, 2)	ENSG00000143401	acidic nuclear phosphoprotein 32 family member E [Source:HGNC Symbol;Acc:HGNC:16673]	chr1	150218417	150236156	-1	q21.2	ANP32E	42.62	protein_coding	3605
0.0074831	0.0363	125.62	135.43	226.1	314.9	402.22	214433_s_at	(2, 5)	ENSG00000143416	selenium binding protein 1 [Source:HGNC Symbol;Acc:HGNC:10719]	chr1	151364304	151372707	-1	q21.3	SELENBP1	54.97	protein_coding	3476
0.0003744	0.00413	118.42	47.53	79.15	58.49	87.95	238076_at	(2, 1), (4, 1), (2, 5), (4, 5)	ENSG00000143614	GATA zinc finger domain containing 2B [Source:HGNC Symbol;Acc:HGNC:30778]	chr1	153789030	153923360	-1	q21.3	GATAD2B	45.03	protein_coding	9244
0.0004446	0.00469	269.23	387.74	355.54	332.87	472.6	202809_s_at	(1, 5), (4, 5)	ENSG00000143624	integrator complex subunit 3 [Source:HGNC Symbol;Acc:HGNC:26153]	chr1	153728050	153774808	1	q21.3	INTS3	48.34	protein_coding	10467
3.35e-05	0.000661	39.7	73.24	126.97	71.26	119.48	235213_at	(1, 3), (1, 5), (4, 5)	ENSG00000143772	inositol-trisphosphate 3-kinase B [Source:HGNC Symbol;Acc:HGNC:6179]	chr1	226631690	226739323	-1	q42.12	ITPKB	49.82	protein_coding	7036
0.0001209	0.00174	52.17	102.97	143.91	76.87	124.81	203723_at	(1, 3), (1, 5), (4, 3), (4, 5)	ENSG00000143772	inositol-trisphosphate 3-kinase B [Source:HGNC Symbol;Acc:HGNC:6179]	chr1	226631690	226739323	-1	q42.12	ITPKB	49.82	protein_coding	7036
2.48e-05	0.000518	37.32	32.33	54.23	133	42.43	229245_at	(1, 4), (2, 4), (3, 4), (5, 4)	ENSG00000143850	pleckstrin homology domain containing A6 [Source:HGNC Symbol;Acc:HGNC:17053]	chr1	204218853	204377665	-1	q32.1	PLEKHA6	48.91	protein_coding	9656
0.0006496	0.00626	91.86	51.48	80.38	154.14	65.09	215342_s_at	(2, 4), (5, 4)	ENSG00000152061	RAB GTPase activating protein 1 like [Source:HGNC Symbol;Acc:HGNC:24663]	chr1	174159410	174995308	1	q25.1	RABGAP1L	37.91	protein_coding	16071
5.6e-06	0.00016	256.56	141.62	279.67	456.92	212.23	203020_at	(2, 3), (2, 4), (5, 4)	ENSG00000152061	RAB GTPase activating protein 1 like [Source:HGNC Symbol;Acc:HGNC:24663]	chr1	174159410	174995308	1	q25.1	RABGAP1L	37.91	protein_coding	16071
0.0078037	0.0373	15.83	15.94	22.06	16.16	12.53	237515_at	(5, 3)	ENSG00000152078	TLC domain containing 4 [Source:HGNC Symbol;Acc:HGNC:26477]	chr1	95117355	95197607	1	p21.3	TLCD4	38.99	protein_coding	7385
0.0026442	0.0172	45.28	76.23	88.07	53.64	36.72	234980_at	(5, 3)	ENSG00000152078	TLC domain containing 4 [Source:HGNC Symbol;Acc:HGNC:26477]	chr1	95117355	95197607	1	p21.3	TLCD4	38.99	protein_coding	7385
0.000647	0.00624	735.58	608.2	522.17	374.82	727.57	226282_at	(4, 5)	ENSG00000152104	protein tyrosine phosphatase non-receptor type 14 [Source:HGNC Symbol;Acc:HGNC:9647]	chr1	214348700	214552449	-1	q41	PTPN14	41.3	protein_coding	18752
4.2e-05	0.000778	237.19	244.51	147.85	121.63	240.97	244533_at	(4, 2), (3, 5), (4, 5)	ENSG00000152104	protein tyrosine phosphatase non-receptor type 14 [Source:HGNC Symbol;Acc:HGNC:9647]	chr1	214348700	214552449	-1	q41	PTPN14	41.3	protein_coding	18752
0.0010979	0.00913	39.45	32.34	36.2	38.42	76.52	230110_at	(2, 5), (3, 5)	ENSG00000153898	mucolipin TRP cation channel 2 [Source:HGNC Symbol;Acc:HGNC:13357]	chr1	84925583	84997113	-1	p22.3	MCOLN2	40.38	protein_coding	3442
0.0065397	0.0331	744.84	709.34	805.51	1486.8	593.62	209094_at	(5, 4)	ENSG00000153904	dimethylarginine dimethylaminohydrolase 1 [Source:HGNC Symbol;Acc:HGNC:2715]	chr1	85318481	85578363	-1	p22.3	DDAH1	39.19	protein_coding	4587
0.0068225	0.0341	59.22	44	78.17	73.34	46.05	212310_at	(5, 3)	ENSG00000154305	MIA SH3 domain ER export factor 3 [Source:HGNC Symbol;Acc:HGNC:24008]	chr1	222618097	222668007	1	q41	MIA3	39.14	protein_coding	10155
0.0021811	0.015	47.89	75.84	34.48	39.86	52.61	229854_at	(3, 2), (4, 2), (3, 5)	ENSG00000154358	obscurin, cytoskeletal calmodulin and titin-interacting RhoGEF [Source:HGNC Symbol;Acc:HGNC:15719]	chr1	228208044	228378876	1	q42.13	OBSCN	53.88	protein_coding	39568
5.33e-05	0.000933	254.5	237.21	186.48	94.17	168.86	225904_at	(4, 1), (4, 2), (4, 3), (4, 5)	ENSG00000154429	centriole, cilia and spindle associated protein [Source:HGNC Symbol;Acc:HGNC:29578]	chr1	229321011	229343294	-1	q42.13	CCSAP	43.58	protein_coding	6257
0.0003356	0.00381	32.63	28.65	31.36	27.05	45.63	229484_at	(2, 5), (4, 5)	ENSG00000155367	protein phosphatase, Mg2+/Mn2+ dependent 1J [Source:HGNC Symbol;Acc:HGNC:20785]	chr1	112709994	112715477	-1	p13.2	PPM1J	58.3	protein_coding	2874
0.0007267	0.00678	67.45	33.39	60.93	36.09	110.14	228955_at	(2, 5), (4, 5)	ENSG00000157193	LDL receptor related protein 8 [Source:HGNC Symbol;Acc:HGNC:6700]	chr1	53242364	53328469	-1	p32.3	LRP8	51.87	protein_coding	19668
0.0028918	0.0184	34.27	22.54	29.4	27.48	53.55	205282_at	(2, 5)	ENSG00000157193	LDL receptor related protein 8 [Source:HGNC Symbol;Acc:HGNC:6700]	chr1	53242364	53328469	-1	p32.3	LRP8	51.87	protein_coding	19668
0.0022912	0.0156	83.53	64.42	80.96	67.76	150.23	208433_s_at	(2, 5), (4, 5)	ENSG00000157193	LDL receptor related protein 8 [Source:HGNC Symbol;Acc:HGNC:6700]	chr1	53242364	53328469	-1	p32.3	LRP8	51.87	protein_coding	19668
0.000807	0.0073	205.53	355.58	218.39	536.09	241.49	231835_at	(1, 4), (3, 4), (5, 4)	ENSG00000157870	peroxiredoxin like 2B [Source:HGNC Symbol;Acc:HGNC:28390]	chr1	2586491	2591469	1	p36.32	PRXL2B	64.59	protein_coding	3371
0.0081106	0.0384	158.02	100.6	100.4	160.72	107.86	213296_at	(3, 4), (5, 4)	ENSG00000157916	retention in endoplasmic reticulum sorting receptor 1 [Source:HGNC Symbol;Acc:HGNC:30309]	chr1	2391775	2405442	1	p36.32	RER1	53.96	protein_coding	5689
< 1e-07	< 1e-07	78.84	166.55	87.06	136.81	74.65	205233_s_at	(1, 2), (3, 2), (5, 2), (3, 4), (5, 4)	ENSG00000158006	platelet activating factor acetylhydrolase 2 [Source:HGNC Symbol;Acc:HGNC:8579]	chr1	25959767	25998117	-1	p36.11	PAFAH2	45.67	protein_coding	3795
< 1e-07	5.91e-06	66	127.12	71	113.2	60.26	205232_s_at	(1, 2), (3, 2), (5, 2), (3, 4), (5, 4)	ENSG00000158006	platelet activating factor acetylhydrolase 2 [Source:HGNC Symbol;Acc:HGNC:8579]	chr1	25959767	25998117	-1	p36.11	PAFAH2	45.67	protein_coding	3795
0.002208	0.0152	34.1	76.72	42.12	25.1	35.34	229518_at	(4, 2), (5, 2)	ENSG00000158246	terminal nucleotidyltransferase 5B [Source:HGNC Symbol;Acc:HGNC:28273]	chr1	27005020	27012850	-1	p36.11	TENT5B	55.52	protein_coding	2382
9.1e-05	0.0014	21.33	35.01	25.14	51.32	30.72	1554895_a_at	(1, 4), (3, 4), (5, 4)	ENSG00000158315	rhomboid like 2 [Source:HGNC Symbol;Acc:HGNC:16083]	chr1	38885807	38941830	-1	p34.3	RHBDL2	44.61	protein_coding	2826
0.0014082	0.0109	20.8	46.01	29.82	78.52	37.58	1554897_s_at	(1, 4), (3, 4), (5, 4)	ENSG00000158315	rhomboid like 2 [Source:HGNC Symbol;Acc:HGNC:16083]	chr1	38885807	38941830	-1	p34.3	RHBDL2	44.61	protein_coding	2826
0.00059	0.00581	8.06	17.4	11.4	30.41	13.49	1552502_s_at	(1, 4), (3, 4), (5, 4)	ENSG00000158315	rhomboid like 2 [Source:HGNC Symbol;Acc:HGNC:16083]	chr1	38885807	38941830	-1	p34.3	RHBDL2	44.61	protein_coding	2826
0.003303	0.0203	324.22	663.95	777.49	531.9	915.37	219489_s_at	(1, 5)	ENSG00000158315	rhomboid like 2 [Source:HGNC Symbol;Acc:HGNC:16083]	chr1	38885807	38941830	-1	p34.3	RHBDL2	44.61	protein_coding	2826
0.0075644	0.0366	827	1756.15	1080.16	1721.64	1391.8	200916_at	(1, 2), (1, 4)	ENSG00000158710	transgelin 2 [Source:HGNC Symbol;Acc:HGNC:11554]	chr1	159918107	159925507	-1	q23.2	TAGLN2	56.34	protein_coding	2262
< 1e-07	5.91e-06	35.04	33.4	31	87.94	33.11	228696_at	(1, 4), (2, 4), (3, 4), (5, 4)	ENSG00000158715	solute carrier family 45 member 3 [Source:HGNC Symbol;Acc:HGNC:8642]	chr1	205657851	205680509	-1	q32.1	SLC45A3	54.44	protein_coding	3752
0.0039204	0.0232	210.71	508.82	259.66	422.35	335.51	221664_s_at	(1, 2), (3, 2)	ENSG00000158769	F11 receptor [Source:HGNC Symbol;Acc:HGNC:14685]	chr1	160995211	161021343	-1	q23.3	F11R	47.23	protein_coding	5061
0.0010882	0.00908	950.48	2241.01	1289.38	2146.06	1529.68	223000_s_at	(1, 2), (1, 4), (3, 2), (3, 4)	ENSG00000158769	F11 receptor [Source:HGNC Symbol;Acc:HGNC:14685]	chr1	160995211	161021343	-1	q23.3	F11R	47.23	protein_coding	5061
0.0012817	0.0102	160.23	515	218.62	331.21	259.44	224097_s_at	(1, 2), (3, 2), (5, 2)	ENSG00000158769	F11 receptor [Source:HGNC Symbol;Acc:HGNC:14685]	chr1	160995211	161021343	-1	q23.3	F11R	47.23	protein_coding	5061
0.0001874	0.00242	20.67	79.92	28.61	38.65	25.66	205627_at	(1, 2), (3, 2), (5, 2)	ENSG00000158825	cytidine deaminase [Source:HGNC Symbol;Acc:HGNC:1712]	chr1	20589086	20618903	1	p36.12	CDA	48.46	protein_coding	820
0.0001893	0.00243	127.16	102.61	203.71	146.51	272.49	225627_s_at	(2, 5), (4, 5)	ENSG00000158966	cache domain containing 1 [Source:HGNC Symbol;Acc:HGNC:29314]	chr1	64470129	64693058	1	p31.3	CACHD1	40.03	protein_coding	7022
0.0065562	0.0331	57.47	38.1	82.89	45.78	45.03	203069_at	(2, 3), (5, 3)	ENSG00000159164	synaptic vesicle glycoprotein 2A [Source:HGNC Symbol;Acc:HGNC:20566]	chr1	149903318	149917844	-1	q21.2	SV2A	52.16	protein_coding	4786
1.2e-06	4.72e-05	77.17	232.54	109.37	357.71	108.4	203287_at	(1, 2), (1, 4), (5, 2), (3, 4), (5, 4)	ENSG00000159166	ladinin 1 [Source:HGNC Symbol;Acc:HGNC:6472]	chr1	201380833	201399915	-1	q32.1	LAD1	54.89	protein_coding	3261
4e-06	0.000123	76.49	190.84	111.29	314.33	102.86	216641_s_at	(1, 4), (3, 4), (5, 4)	ENSG00000159166	ladinin 1 [Source:HGNC Symbol;Acc:HGNC:6472]	chr1	201380833	201399915	-1	q32.1	LAD1	54.89	protein_coding	3261
0.0024218	0.0162	62.27	53.19	101.48	39.11	83.96	227285_at	(4, 3), (4, 5)	ENSG00000159208	circadian associated repressor of transcription [Source:HGNC Symbol;Acc:HGNC:25200]	chr1	150282543	150287093	1	q21.2	CIART	47.53	protein_coding	2849
0.0034091	0.0208	80.14	90.36	80.74	86.62	62.77	218608_at	(5, 2), (5, 4)	ENSG00000159363	ATPase cation transporting 13A2 [Source:HGNC Symbol;Acc:HGNC:30213]	chr1	16985958	17011928	-1	p36.13	ATP13A2	57.23	protein_coding	5253
0.0010066	0.0086	98.14	45.49	61.23	36.5	47.43	203722_at	(2, 1), (4, 1), (5, 1), (4, 3)	ENSG00000159423	aldehyde dehydrogenase 4 family member A1 [Source:HGNC Symbol;Acc:HGNC:406]	chr1	18871430	18902724	-1	p36.13	ALDH4A1	55.04	protein_coding	3632
< 1e-07	< 1e-07	67.6	73.22	36.32	27.09	182.12	205334_at	(3, 5), (4, 5)	ENSG00000160678	S100 calcium binding protein A1 [Source:HGNC Symbol;Acc:HGNC:10486]	chr1	153627926	153632039	1	q21.3	S100A1	55.61	protein_coding	3030
0.0030165	0.019	65.95	132.07	68.37	93.42	147.58	226333_at	(3, 5)	ENSG00000160712	interleukin 6 receptor [Source:HGNC Symbol;Acc:HGNC:6019]	chr1	154405193	154469450	1	q21.3	IL6R	49.12	protein_coding	6453
0.0049272	0.0272	31.58	81.15	33.16	50.86	82.29	205945_at	(3, 5)	ENSG00000160712	interleukin 6 receptor [Source:HGNC Symbol;Acc:HGNC:6019]	chr1	154405193	154469450	1	q21.3	IL6R	49.12	protein_coding	6453
0.0032154	0.0199	35.8	20.29	51.73	21.25	21.98	203999_at	(2, 3), (4, 3), (5, 3)	ENSG00000067715	synaptotagmin 1 [Source:HGNC Symbol;Acc:HGNC:11509]	chr12	78863993	79452008	1	q21.2	SYT1	35.61	protein_coding	6389
0.0007495	0.00692	251.13	440.7	252.38	453.41	453.07	1554600_s_at	(3, 4), (3, 5)	ENSG00000160789	lamin A/C [Source:HGNC Symbol;Acc:HGNC:6636]	chr1	156082573	156140081	1	q22	LMNA	53.03	protein_coding	8141
0.0044525	0.0253	7.34	6.55	32.45	8.18	10.7	239178_at	(2, 3), (4, 3), (5, 3)	ENSG00000102678	fibroblast growth factor 9 [Source:HGNC Symbol;Acc:HGNC:3687]	chr13	21671073	21704498	1	q12.11	FGF9	42.92	protein_coding	4849
0.003711	0.0222	20.81	193.56	88.83	340.76	185.37	1553589_a_at	(1, 2), (1, 4), (1, 5)	ENSG00000162366	PDZK1 interacting protein 1 [Source:HGNC Symbol;Acc:HGNC:16887]	chr1	47183582	47191044	-1	p33	PDZK1IP1	57.9	protein_coding	1430
0.0049189	0.0272	21.33	213.84	94.94	388.54	209.87	219630_at	(1, 2), (1, 4), (1, 5)	ENSG00000162366	PDZK1 interacting protein 1 [Source:HGNC Symbol;Acc:HGNC:16887]	chr1	47183582	47191044	-1	p33	PDZK1IP1	57.9	protein_coding	1430
4.46e-05	0.000815	316.97	410.11	339.62	643.53	303.59	222448_s_at	(1, 4), (3, 4), (5, 4)	ENSG00000162368	cytidine/uridine monophosphate kinase 1 [Source:HGNC Symbol;Acc:HGNC:18170]	chr1	47333790	47378839	1	p33	CMPK1	42.2	protein_coding	3851
5.22e-05	0.00092	459.14	536.34	466.6	997.4	394.09	217870_s_at	(3, 4), (5, 4)	ENSG00000162368	cytidine/uridine monophosphate kinase 1 [Source:HGNC Symbol;Acc:HGNC:18170]	chr1	47333790	47378839	1	p33	CMPK1	42.2	protein_coding	3851
0.0084627	0.0396	109.88	101.36	96.15	73.84	113.14	227348_at	(4, 5)	ENSG00000162396	prolyl-tRNA synthetase 2, mitochondrial [Source:HGNC Symbol;Acc:HGNC:30563]	chr1	54756898	54764523	-1	p32.3	PARS2	49.79	protein_coding	2356
4e-05	0.000752	51.06	23.46	42.12	63.61	28.38	231851_at	(2, 4), (5, 4)	ENSG00000162437	ribonucleoprotein, PTB binding 2 [Source:HGNC Symbol;Acc:HGNC:25577]	chr1	64745095	64833232	1	p31.3	RAVER2	37.2	protein_coding	6070
0.0001378	0.00191	132.94	127.43	94.36	94.9	47.25	238066_at	(5, 2), (5, 4)	ENSG00000162444	retinol binding protein 7 [Source:HGNC Symbol;Acc:HGNC:30316]	chr1	9997206	10016021	1	p36.22	RBP7	48.33	protein_coding	862
0.0016849	0.0125	713	414.99	458.25	736.9	354.3	225258_at	(5, 4)	ENSG00000162458	filamin binding LIM protein 1 [Source:HGNC Symbol;Acc:HGNC:24686]	chr1	15756607	15786594	1	p36.21	FBLIM1	53.53	protein_coding	4351
2.8e-06	9.33e-05	90.83	67.45	72.22	158.9	70.9	206469_x_at	(2, 4), (3, 4), (5, 4)	ENSG00000162482	aldo-keto reductase family 7 member A3 [Source:HGNC Symbol;Acc:HGNC:390]	chr1	19282573	19288770	-1	p36.13	AKR7A3	54.24	protein_coding	1215
9.81e-05	0.00147	109.56	96.88	102.38	339.6	177.25	202481_at	(1, 4), (2, 4), (3, 4), (5, 4)	ENSG00000162496	dehydrogenase/reductase 3 [Source:HGNC Symbol;Acc:HGNC:17693]	chr1	12567910	12618210	-1	p36.21	DHRS3	51.33	protein_coding	3515
0.0007368	0.00685	271.06	70.3	91.64	87.48	109.86	225396_at	(2, 1), (3, 1), (4, 1), (5, 1)	ENSG00000162521	RB binding protein 4, chromatin remodeling factor [Source:HGNC Symbol;Acc:HGNC:9887]	chr1	32651142	32686211	1	p35.1	RBBP4	42.94	protein_coding	9470
< 1e-07	< 1e-07	26.56	16.26	38.92	80.4	14.79	228302_x_at	(2, 4), (5, 3), (5, 4)	ENSG00000162545	calcium/calmodulin dependent protein kinase II inhibitor 1 [Source:HGNC Symbol;Acc:HGNC:24190]	chr1	20482391	20486210	-1	p36.12	CAMK2N1	57.49	protein_coding	2605
< 1e-07	< 1e-07	199.72	132.95	516.9	907.55	102.51	218309_at	(2, 4), (5, 3), (5, 4)	ENSG00000162545	calcium/calmodulin dependent protein kinase II inhibitor 1 [Source:HGNC Symbol;Acc:HGNC:24190]	chr1	20482391	20486210	-1	p36.12	CAMK2N1	57.49	protein_coding	2605
0.0059466	0.031	41.33	121.53	39.51	43.33	67.17	226869_at	(3, 2), (4, 2)	ENSG00000162591	multiple EGF like domains 6 [Source:HGNC Symbol;Acc:HGNC:3232]	chr1	3487951	3611508	-1	p36.32	MEGF6	62.43	protein_coding	9021
0.0004043	0.00437	69.66	54.48	129.5	50.68	29.63	215506_s_at	(5, 3)	ENSG00000162595	DIRAS family GTPase 3 [Source:HGNC Symbol;Acc:HGNC:687]	chr1	68045886	68051631	-1	p31.3	DIRAS3	43.82	protein_coding	2049
0.0001974	0.00251	250.43	142.77	547.52	522.56	514.39	224970_at	(2, 3), (2, 4), (2, 5)	ENSG00000162599	nuclear factor I A [Source:HGNC Symbol;Acc:HGNC:7784]	chr1	60865259	61462788	1	p31.3	NFIA	40.05	protein_coding	55886
6.76e-05	0.00112	122.53	61.86	273.82	248.57	245.88	224975_at	(2, 3), (2, 4), (2, 5)	ENSG00000162599	nuclear factor I A [Source:HGNC Symbol;Acc:HGNC:7784]	chr1	60865259	61462788	1	p31.3	NFIA	40.05	protein_coding	55886
0.0001076	0.00158	137.16	69.22	292.3	287.56	273.08	226806_s_at	(2, 3), (2, 4), (2, 5)	ENSG00000162599	nuclear factor I A [Source:HGNC Symbol;Acc:HGNC:7784]	chr1	60865259	61462788	1	p31.3	NFIA	40.05	protein_coding	55886
0.0001274	0.00181	108.03	66.56	258.53	214.48	226.86	224976_at	(2, 3), (2, 4), (2, 5)	ENSG00000162599	nuclear factor I A [Source:HGNC Symbol;Acc:HGNC:7784]	chr1	60865259	61462788	1	p31.3	NFIA	40.05	protein_coding	55886
0.0001802	0.00235	633.17	220.16	217.71	150.35	305.23	202412_s_at	(2, 1), (3, 1), (4, 1), (4, 5)	ENSG00000162607	ubiquitin specific peptidase 1 [Source:HGNC Symbol;Acc:HGNC:12607]	chr1	62436297	62451804	1	p31.3	USP1	39.48	protein_coding	3869
0.0001909	0.00245	1559.4	652.16	801.64	565.19	991.74	202413_s_at	(2, 1), (4, 1), (4, 5)	ENSG00000162607	ubiquitin specific peptidase 1 [Source:HGNC Symbol;Acc:HGNC:12607]	chr1	62436297	62451804	1	p31.3	USP1	39.48	protein_coding	3869
0.003829	0.0228	44.67	79.38	74.24	77.25	50.77	219134_at		ENSG00000162618	adhesion G protein-coupled receptor L4 [Source:HGNC Symbol;Acc:HGNC:20822]	chr1	78889764	79282124	-1	p31.1	ADGRL4	35.25	protein_coding	5798
0.0018954	0.0136	120.11	229.26	124.44	358.16	309.48	202748_at	(3, 4), (3, 5)	ENSG00000162645	guanylate binding protein 2 [Source:HGNC Symbol;Acc:HGNC:4183]	chr1	89106132	89150456	-1	p22.2	GBP2	38	protein_coding	7223
2.75e-05	0.000562	179.45	70.8	193.98	168.38	161.6	209537_at	(2, 1), (2, 3), (2, 4), (2, 5)	ENSG00000162694	exostosin like glycosyltransferase 2 [Source:HGNC Symbol;Acc:HGNC:3516]	chr1	100872372	100895179	-1	p21.2	EXTL2	38.14	protein_coding	4015
< 1e-07	5.91e-06	831.18	774.36	860.53	683.02	1556.04	200788_s_at	(2, 5), (3, 5), (4, 5)	ENSG00000162734	proliferation and apoptosis adaptor protein 15 [Source:HGNC Symbol;Acc:HGNC:8822]	chr1	160205380	160215376	1	q23.2	PEA15	51.75	protein_coding	2763
0.0001401	0.00193	284.91	335.84	372.01	382.31	787.67	208966_x_at	(2, 5), (3, 5), (4, 5)	ENSG00000163565	interferon gamma inducible protein 16 [Source:HGNC Symbol;Acc:HGNC:5395]	chr1	158999968	159055155	1	q23.1	IFI16	38.34	protein_coding	5294
0.0002908	0.0034	271.1	252.7	205.14	152.91	122.56	228191_at	(5, 1), (5, 2), (5, 3)	ENSG00000162769	FLVCR heme transporter 1 [Source:HGNC Symbol;Acc:HGNC:24682]	chr1	212858275	212899363	1	q32.3	FLVCR1	40.24	protein_coding	6422
0.0065333	0.033	209.86	205.16	147.58	125.89	97.88	222906_at	(5, 2)	ENSG00000162769	FLVCR heme transporter 1 [Source:HGNC Symbol;Acc:HGNC:24682]	chr1	212858275	212899363	1	q32.3	FLVCR1	40.24	protein_coding	6422
0.0004564	0.00477	33.01	90.11	23.53	30.17	36.24	1554420_at	(3, 2), (4, 2), (5, 2)	ENSG00000162772	activating transcription factor 3 [Source:HGNC Symbol;Acc:HGNC:785]	chr1	212565334	212620777	1	q32.3	ATF3	43.16	protein_coding	4040
0.0019181	0.0137	155.32	462.46	81.34	157.51	246.23	202672_s_at	(3, 2), (3, 5)	ENSG00000162772	activating transcription factor 3 [Source:HGNC Symbol;Acc:HGNC:785]	chr1	212565334	212620777	1	q32.3	ATF3	43.16	protein_coding	4040
0.0020111	0.0142	76.55	124.96	77.28	149	77.71	232103_at	(3, 4), (5, 4)	ENSG00000162813	3'(2'), 5'-bisphosphate nucleotidase 1 [Source:HGNC Symbol;Acc:HGNC:1096]	chr1	220057482	220090462	-1	q41	BPNT1	40.42	protein_coding	3113
0.0060173	0.0313	56.4	51.86	36.4	37.56	36.11	227927_at	(5, 1), (5, 2)	ENSG00000162825	NBPF member 20 [Source:HGNC Symbol;Acc:HGNC:32000]	chr1	145289900	145405778	-1	q21.1	NBPF20	44.12	protein_coding	18995
0.0010854	0.00906	258.31	122.3	264.48	428.67	130.59	222871_at	(2, 4), (5, 4)	ENSG00000162873	kelch domain containing 8A [Source:HGNC Symbol;Acc:HGNC:25573]	chr1	205336061	205357090	-1	q32.1	KLHDC8A	50.87	protein_coding	3666
0.0023345	0.0157	88.27	49.95	90.43	156.14	44.14	219331_s_at	(5, 4)	ENSG00000162873	kelch domain containing 8A [Source:HGNC Symbol;Acc:HGNC:25573]	chr1	205336061	205357090	-1	q32.1	KLHDC8A	50.87	protein_coding	3666
1e-07	5.91e-06	36.37	806.92	312.57	912.62	68.14	226147_s_at	(1, 2), (1, 4), (5, 2), (5, 3), (5, 4)	ENSG00000162896	polymeric immunoglobulin receptor [Source:HGNC Symbol;Acc:HGNC:8968]	chr1	206928522	206946466	-1	q32.1	PIGR	49.28	protein_coding	4372
< 1e-07	< 1e-07	42.47	1250.08	183.84	1510.72	79.27	229659_s_at	(1, 2), (1, 4), (3, 2), (5, 2), (3, 4), (5, 4)	ENSG00000162896	polymeric immunoglobulin receptor [Source:HGNC Symbol;Acc:HGNC:8968]	chr1	206928522	206946466	-1	q32.1	PIGR	49.28	protein_coding	4372
0.0050894	0.0279	1336.94	1180.95	1855.25	2800.67	1982.34	208683_at	(2, 4), (2, 5)	ENSG00000162909	calpain 2 [Source:HGNC Symbol;Acc:HGNC:1479]	chr1	223701593	223776018	1	q41	CAPN2	48.73	protein_coding	8585
0.0007118	0.00669	23.62	38.88	25.92	22.27	40.46	220279_at	(3, 5), (4, 5)	ENSG00000162931	tripartite motif containing 17 [Source:HGNC Symbol;Acc:HGNC:13430]	chr1	228407935	228416861	-1	q42.13	TRIM17	56.74	protein_coding	3553
0.000186	0.0024	47.75	62.34	104.46	55.65	48.01	206090_s_at	(1, 3), (4, 3), (5, 3)	ENSG00000162946	DISC1 scaffold protein [Source:HGNC Symbol;Acc:HGNC:2888]	chr1	231626790	232041272	1	q42.2	DISC1	42.18	protein_coding	12931
0.0042974	0.0248	30.27	17.13	19.41	31.41	26.3	222542_x_at	(2, 4), (2, 5), (3, 4)	ENSG00000163050	coenzyme Q8A [Source:HGNC Symbol;Acc:HGNC:16812]	chr1	226940286	226987544	1	q42.13	COQ8A	53.68	protein_coding	4736
0.0025377	0.0167	232.96	121.11	156.16	296.76	231.54	218168_s_at	(2, 4), (2, 5), (3, 4)	ENSG00000163050	coenzyme Q8A [Source:HGNC Symbol;Acc:HGNC:16812]	chr1	226940286	226987544	1	q42.13	COQ8A	53.68	protein_coding	4736
0.0027036	0.0175	13.54	28.42	13.63	34.11	23.11	202901_x_at	(1, 4), (3, 2), (3, 4), (3, 5)	ENSG00000163131	cathepsin S [Source:HGNC Symbol;Acc:HGNC:2545]	chr1	150730079	150765957	-1	q21.3	CTSS	39.37	protein_coding	6888
3.11e-05	0.000626	240.87	460.35	111.89	815.2	378.49	219010_at	(3, 2), (3, 4), (3, 5), (5, 4)	ENSG00000163362	innate immunity activator [Source:HGNC Symbol;Acc:HGNC:25599]	chr1	200891048	200915742	1	q32.1	INAVA	53.23	protein_coding	5341
0.0037418	0.0223	13.6	37.35	29.32	40.32	24.13	228497_at	(1, 2), (1, 4), (5, 4)	ENSG00000163393	solute carrier family 22 member 15 [Source:HGNC Symbol;Acc:HGNC:20301]	chr1	115976513	116070054	1	p13.1	SLC22A15	39.49	protein_coding	5277
0.0001852	0.0024	878.77	519.33	1121.41	1474.52	872.01	220948_s_at	(2, 3), (2, 4), (2, 5), (5, 4)	ENSG00000163399	ATPase Na+/K+ transporting subunit alpha 1 [Source:HGNC Symbol;Acc:HGNC:799]	chr1	116372668	116410261	1	p13.1	ATP1A1	44.46	protein_coding	7277
0.0018392	0.0133	220.16	833.26	382.87	1001.08	684.09	210827_s_at	(1, 2), (1, 4), (1, 5), (3, 4)	ENSG00000163435	E74 like ETS transcription factor 3 [Source:HGNC Symbol;Acc:HGNC:3318]	chr1	202007945	202017183	1	q32.1	ELF3	54.8	protein_coding	7186
< 1e-07	< 1e-07	128.22	549.39	267.97	84.98	393.14	220987_s_at	(1, 2), (1, 5), (4, 2), (4, 3), (4, 5)	ENSG00000163545	NUAK family kinase 2 [Source:HGNC Symbol;Acc:HGNC:29558]	chr1	205302063	205321745	-1	q32.1	NUAK2	51.29	protein_coding	3391
< 1e-07	5.91e-06	85.61	17.01	32.09	29.57	278.26	231192_at	(2, 5), (3, 5), (4, 5)	ENSG00000171517	lysophosphatidic acid receptor 3 [Source:HGNC Symbol;Acc:HGNC:14298]	chr1	84811602	84893206	-1	p22.3	LPAR3	41.6	protein_coding	3536
7.97e-05	0.00127	87.2	112.61	126.52	128.99	277.93	208965_s_at	(1, 5), (2, 5), (3, 5), (4, 5)	ENSG00000163565	interferon gamma inducible protein 16 [Source:HGNC Symbol;Acc:HGNC:5395]	chr1	158999968	159055155	1	q23.1	IFI16	38.34	protein_coding	5294
0.0001549	0.00209	276.8	363.6	384.68	417.78	793.89	206332_s_at	(1, 5), (2, 5), (3, 5)	ENSG00000163565	interferon gamma inducible protein 16 [Source:HGNC Symbol;Acc:HGNC:5395]	chr1	158999968	159055155	1	q23.1	IFI16	38.34	protein_coding	5294
0.0006259	0.00609	51.81	192.05	69.82	145.57	95.11	218810_at	(1, 2), (1, 4), (3, 2), (5, 2), (3, 4)	ENSG00000163874	zinc finger CCCH-type containing 12A [Source:HGNC Symbol;Acc:HGNC:26259]	chr1	37474580	37484377	1	p34.3	ZC3H12A	59.32	protein_coding	3091
3e-07	1.49e-05	163.01	84.92	92.77	129.17	52.14	226828_s_at	(5, 1), (5, 3), (5, 4)	ENSG00000163909	hes related family bHLH transcription factor with YRPW motif like [Source:HGNC Symbol;Acc:HGNC:4882]	chr1	39623435	39639643	-1	p34.2	HEYL	51.58	protein_coding	4077
1.02e-05	0.000257	42.46	172.58	102.89	57.91	58.98	225316_at	(1, 2), (4, 2), (5, 2), (5, 3)	ENSG00000168389	major facilitator superfamily domain containing 2A [Source:HGNC Symbol;Acc:HGNC:25897]	chr1	39955112	39969968	1	p34.2	MFSD2A	53.7	protein_coding	4007
2.64e-05	0.000546	48.44	170.88	96.01	267.91	90.68	224762_at	(1, 2), (1, 4), (3, 4), (5, 4)	ENSG00000168528	serine incorporator 2 [Source:HGNC Symbol;Acc:HGNC:23231]	chr1	31409565	31434680	1	p35.2	SERINC2	52.8	protein_coding	3452
< 1e-07	< 1e-07	76.87	12.87	25.54	42.54	13.52	227123_at	(2, 1), (3, 1), (5, 1), (2, 4), (5, 3), (5, 4)	ENSG00000169213	RAB3B, member RAS oncogene family [Source:HGNC Symbol;Acc:HGNC:9778]	chr1	51907956	51990700	-1	p32.3	RAB3B	44.35	protein_coding	12780
3.75e-05	0.000718	70.74	31.99	35.36	76.7	26.03	205924_at	(5, 1), (5, 4)	ENSG00000169213	RAB3B, member RAS oncogene family [Source:HGNC Symbol;Acc:HGNC:9778]	chr1	51907956	51990700	-1	p32.3	RAB3B	44.35	protein_coding	12780
0.0016698	0.0124	247.72	938.49	329.1	509.79	411.68	202023_at	(1, 2), (3, 2), (5, 2)	ENSG00000169242	ephrin A1 [Source:HGNC Symbol;Acc:HGNC:3221]	chr1	155127876	155134899	1	q22	EFNA1	53.76	protein_coding	2165
0.0061904	0.0319	86.29	160.85	101	172.79	167.12	227184_at	(3, 5)	ENSG00000169403	platelet activating factor receptor [Source:HGNC Symbol;Acc:HGNC:9582]	chr1	28147166	28193936	-1	p35.3	PTAFR	48	protein_coding	4208
0.0039897	0.0235	42.32	86.04	49.38	84.78	76.74	211661_x_at	(3, 4), (3, 5)	ENSG00000169403	platelet activating factor receptor [Source:HGNC Symbol;Acc:HGNC:9582]	chr1	28147166	28193936	-1	p35.3	PTAFR	48	protein_coding	4208
2e-07	1.08e-05	151.07	137.91	79.69	77.47	215.85	204648_at	(3, 5), (4, 5)	ENSG00000169418	natriuretic peptide receptor 1 [Source:HGNC Symbol;Acc:HGNC:7943]	chr1	153678688	153693992	1	q21.3	NPR1	55.39	protein_coding	4952
< 1e-07	< 1e-07	153.27	157.94	67.32	46.61	335.16	32625_at	(4, 2), (3, 5), (4, 5)	ENSG00000169418	natriuretic peptide receptor 1 [Source:HGNC Symbol;Acc:HGNC:7943]	chr1	153678688	153693992	1	q21.3	NPR1	55.39	protein_coding	4952
0.0029958	0.0189	27.73	105.64	20.29	22.97	43.02	34210_at	(3, 2), (4, 2)	ENSG00000169442	CD52 molecule [Source:HGNC Symbol;Acc:HGNC:1804]	chr1	26317958	26320523	1	p36.11	CD52	54.56	protein_coding	934
0.0024978	0.0166	49.56	134.67	32.47	37.92	64.38	204661_at	(3, 2), (4, 2)	ENSG00000169442	CD52 molecule [Source:HGNC Symbol;Acc:HGNC:1804]	chr1	26317958	26320523	1	p36.11	CD52	54.56	protein_coding	934
0.0030209	0.019	54.88	68.06	67.49	42.23	91.23	221881_s_at	(4, 5)	ENSG00000169504	chloride intracellular channel 4 [Source:HGNC Symbol;Acc:HGNC:13518]	chr1	24745382	24844321	1	p36.11	CLIC4	41.66	protein_coding	4467
0.004273	0.0247	688.59	645.38	714.83	540.45	906.17	201560_at	(4, 5)	ENSG00000169504	chloride intracellular channel 4 [Source:HGNC Symbol;Acc:HGNC:13518]	chr1	24745382	24844321	1	p36.11	CLIC4	41.66	protein_coding	4467
3.44e-05	0.000673	81.01	25.68	43.45	43.6	149.05	220816_at	(2, 5), (3, 5), (4, 5)	ENSG00000171517	lysophosphatidic acid receptor 3 [Source:HGNC Symbol;Acc:HGNC:14298]	chr1	84811602	84893206	-1	p22.3	LPAR3	41.6	protein_coding	3536
6e-07	2.63e-05	147.07	61.41	50.95	52.37	166.47	202524_s_at	(2, 5), (3, 5), (4, 5)	ENSG00000107742	SPARC (osteonectin), cwcv and kazal like domains proteoglycan 2 [Source:HGNC Symbol;Acc:HGNC:13564]	chr10	72059034	72089032	-1	q22.1	SPOCK2	55.97	protein_coding	6411
0.0004543	0.00477	783.04	1217.28	608.77	719.38	643.13	201561_s_at	(3, 2), (4, 2), (5, 2)	ENSG00000171603	calsyntenin 1 [Source:HGNC Symbol;Acc:HGNC:17447]	chr1	9728926	9823984	-1	p36.22	CLSTN1	47.19	protein_coding	5241
0.0027303	0.0176	77.84	64.04	43.49	53.37	81.47	203879_at	(3, 5)	ENSG00000171608	phosphatidylinositol-4,5-bisphosphate 3-kinase catalytic subunit delta [Source:HGNC Symbol;Acc:HGNC:8977]	chr1	9651731	9729114	1	p36.22	PIK3CD	51.33	protein_coding	6333
0.0086046	0.0401	61.73	83.22	77.46	79.09	116.68	226075_at		ENSG00000171621	splA/ryanodine receptor domain and SOCS box containing 1 [Source:HGNC Symbol;Acc:HGNC:30628]	chr1	9292894	9369532	1	p36.22	SPSB1	54.29	protein_coding	3389
0.0076718	0.0369	52.98	81.84	56.57	56.16	93.77	219677_at		ENSG00000171621	splA/ryanodine receptor domain and SOCS box containing 1 [Source:HGNC Symbol;Acc:HGNC:30628]	chr1	9292894	9369532	1	p36.22	SPSB1	54.29	protein_coding	3389
0.0029751	0.0188	56.79	85.44	64.15	130.29	76.38	218815_s_at	(1, 4), (3, 4), (5, 4)	ENSG00000171729	transmembrane protein 51 [Source:HGNC Symbol;Acc:HGNC:25488]	chr1	15152532	15220478	1	p36.21	TMEM51	48.41	protein_coding	2238
0.0053974	0.0289	20.09	22.98	22.93	24.26	54.92	221900_at		ENSG00000171812	collagen type VIII alpha 2 chain [Source:HGNC Symbol;Acc:HGNC:2216]	chr1	36095239	36125222	-1	p34.3	COL8A2	55.63	protein_coding	4669
0.000124	0.00177	14.27	13.21	24.05	55.65	51.25	239579_at	(2, 4), (2, 5)	ENSG00000172031	epoxide hydrolase 4 [Source:HGNC Symbol;Acc:HGNC:23758]	chr1	92029985	92063538	1	p22.1	EPHX4	38.34	protein_coding	2250
0.0004905	0.00505	109.83	135.43	177.08	211.74	108.44	1553954_at	(5, 3), (5, 4)	ENSG00000172339	ALG14 UDP-N-acetylglucosaminyltransferase subunit [Source:HGNC Symbol;Acc:HGNC:28287]	chr1	94974405	95072951	-1	p21.3	ALG14	40.49	protein_coding	9641
0.0016246	0.0122	25.03	28.17	33.47	49.77	34.04	1555240_s_at	(1, 4), (2, 4), (3, 4), (5, 4)	ENSG00000172380	G protein subunit gamma 12 [Source:HGNC Symbol;Acc:HGNC:19663]	chr1	67701475	67833467	-1	p31.3	GNG12	41.55	protein_coding	4715
0.0019135	0.0137	395.57	496.64	657.85	976.23	562.5	212294_at	(1, 4), (2, 4), (5, 4)	ENSG00000172380	G protein subunit gamma 12 [Source:HGNC Symbol;Acc:HGNC:19663]	chr1	67701475	67833467	-1	p31.3	GNG12	41.55	protein_coding	4715
0.0032202	0.0199	40.87	71.78	75.73	120	75.27	222834_s_at	(1, 4), (5, 4)	ENSG00000172380	G protein subunit gamma 12 [Source:HGNC Symbol;Acc:HGNC:19663]	chr1	67701475	67833467	-1	p31.3	GNG12	41.55	protein_coding	4715
0.0071449	0.0352	1031.68	649.19	601.12	424.87	779.19	201897_s_at	(4, 1), (4, 5)	ENSG00000173207	CDC28 protein kinase regulatory subunit 1B [Source:HGNC Symbol;Acc:HGNC:19083]	chr1	154974653	154979251	1	q21.3	CKS1B	44.4	protein_coding	2340
0.002417	0.0162	358.58	505.17	592.81	405.71	646.12	229997_at	(4, 5)	ENSG00000173218	VANGL planar cell polarity protein 1 [Source:HGNC Symbol;Acc:HGNC:15512]	chr1	115641970	115698224	1	p13.1	VANGL1	45.32	protein_coding	9045
0.0035401	0.0214	47.07	57.09	103.93	56.01	89.82	229134_at	(4, 5)	ENSG00000173218	VANGL planar cell polarity protein 1 [Source:HGNC Symbol;Acc:HGNC:15512]	chr1	115641970	115698224	1	p13.1	VANGL1	45.32	protein_coding	9045
0.0012176	0.00982	87.09	106.85	121.91	73.36	153.64	219330_at	(4, 5)	ENSG00000173218	VANGL planar cell polarity protein 1 [Source:HGNC Symbol;Acc:HGNC:15512]	chr1	115641970	115698224	1	p13.1	VANGL1	45.32	protein_coding	9045
6e-07	2.63e-05	445.52	380.67	1558.58	2475.25	2407.96	202233_s_at	(1, 4), (1, 5), (2, 3), (2, 4), (2, 5)	ENSG00000173660	ubiquinol-cytochrome c reductase hinge protein [Source:HGNC Symbol;Acc:HGNC:12590]	chr1	46303698	46316776	1	p33	UQCRH	46.23	protein_coding	1341
0.0002583	0.00311	15.67	20.86	56.29	114.88	29.66	229254_at	(1, 4), (2, 4), (5, 4)	ENSG00000174514	major facilitator superfamily domain containing 4A [Source:HGNC Symbol;Acc:HGNC:25433]	chr1	205568885	205602918	1	q32.1	MFSD4A	50.98	protein_coding	5790
0.0047901	0.0267	37.82	38.59	13.09	40.76	14.11	205380_at	(5, 4)	ENSG00000174827	PDZ domain containing 1 [Source:HGNC Symbol;Acc:HGNC:8821]	chr1	145670852	145708148	-1	q21.1	PDZK1	44.57	protein_coding	2480
0.0001005	0.00149	35.46	219.6	156.97	187.04	89.56	209260_at	(1, 2), (1, 3), (1, 4), (5, 2), (5, 4)	ENSG00000175793	stratifin [Source:HGNC Symbol;Acc:HGNC:10773]	chr1	26863149	26864456	1	p36.11	SFN	62.77	protein_coding	1308
0.00109	0.00908	211.43	1796.09	1075.86	1328.96	697.05	33322_i_at	(1, 2), (1, 3), (1, 4), (5, 2)	ENSG00000175793	stratifin [Source:HGNC Symbol;Acc:HGNC:10773]	chr1	26863149	26864456	1	p36.11	SFN	62.77	protein_coding	1308
0.00261	0.0171	112.52	1343.99	632.94	916.09	432.42	33323_r_at	(1, 2), (1, 4), (5, 2)	ENSG00000175793	stratifin [Source:HGNC Symbol;Acc:HGNC:10773]	chr1	26863149	26864456	1	p36.11	SFN	62.77	protein_coding	1308
0.009469	0.0429	79.86	80.73	71.95	85.61	126.51	201465_s_at	(3, 5)	ENSG00000177606	Jun proto-oncogene, AP-1 transcription factor subunit [Source:HGNC Symbol;Acc:HGNC:6204]	chr1	58776845	58784048	-1	p32.1	JUN	47.04	protein_coding	3624
3.93e-05	0.000743	41.53	180.57	27.29	24.44	30.45	219225_at	(3, 2), (4, 2), (5, 2)	ENSG00000177614	piggyBac transposable element derived 5 [Source:HGNC Symbol;Acc:HGNC:19405]	chr1	230314490	230426332	-1	q42.13	PGBD5	48.33	protein_coding	11257
1e-07	5.91e-06	14.6	66.22	36.55	43.09	19.33	1556012_at	(1, 2), (1, 4), (5, 2), (5, 3), (5, 4)	ENSG00000179023	kelch domain containing 7A [Source:HGNC Symbol;Acc:HGNC:26791]	chr1	18480930	18485974	1	p36.13	KLHDC7A	58.2	protein_coding	5045
0.0026094	0.0171	332.23	696.84	480.33	779.5	428.98	202838_at	(1, 4), (5, 4)	ENSG00000179163	alpha-L-fucosidase 1 [Source:HGNC Symbol;Acc:HGNC:4006]	chr1	23845077	23868290	-1	p36.11	FUCA1	45.7	protein_coding	2043
0.0074611	0.0363	69.47	35.66	83.97	60.29	73.15	227593_at	(2, 3), (2, 5)	ENSG00000179743	uncharacterized LOC729614 [Source:NCBI gene (formerly Entrezgene);Acc:729614]	chr1	15834474	15848147	-1	p36.21	FLJ37453	50.48	lncRNA	2473
0.0004431	0.00468	63.25	52.22	63.86	244.85	52.75	228865_at	(2, 4), (3, 4), (5, 4)	ENSG00000182795	chromosome 1 open reading frame 116 [Source:HGNC Symbol;Acc:HGNC:28667]	chr1	207018522	207032756	-1	q32.1	C1orf116	47.45	protein_coding	5501
0.0002727	0.00323	37.82	30.9	30.87	91.06	28.88	219856_at	(2, 4), (3, 4), (5, 4)	ENSG00000182795	chromosome 1 open reading frame 116 [Source:HGNC Symbol;Acc:HGNC:28667]	chr1	207018522	207032756	-1	q32.1	C1orf116	47.45	protein_coding	5501
0.000256	0.0031	73.13	39.2	63.35	252.87	41.99	219476_at	(2, 4), (3, 4), (5, 4)	ENSG00000182795	chromosome 1 open reading frame 116 [Source:HGNC Symbol;Acc:HGNC:28667]	chr1	207018522	207032756	-1	q32.1	C1orf116	47.45	protein_coding	5501
0.0011016	0.00914	93.35	70.29	59.73	58.03	115.15	225303_at	(3, 5), (4, 5)	ENSG00000183853	kirre like nephrin family adhesion molecule 1 [Source:HGNC Symbol;Acc:HGNC:15734]	chr1	157993273	158100262	1	q23.1	KIRREL1	49.16	protein_coding	7872
0.0063501	0.0324	60.57	88.56	80.96	72.8	115.23	209716_at	(4, 5)	ENSG00000184371	colony stimulating factor 1 [Source:HGNC Symbol;Acc:HGNC:2432]	chr1	109910242	109930992	1	p13.3	CSF1	54.81	protein_coding	5238
0.0049909	0.0275	139.08	48.17	96.03	56.53	41.82	226132_s_at	(5, 1), (5, 3)	ENSG00000185090	mannosidase endo-alpha like [Source:HGNC Symbol;Acc:HGNC:26452]	chr1	37793847	37801137	1	p34.3	MANEAL	54.59	protein_coding	2973
0.0012277	0.00988	45.13	175.62	66.04	217.81	177.35	211695_x_at	(1, 4), (1, 5), (3, 4), (3, 5)	ENSG00000185499	mucin 1, cell surface associated [Source:HGNC Symbol;Acc:HGNC:7508]	chr1	155185824	155192916	-1	q22	MUC1	68.01	protein_coding	4717
0.000274	0.00324	400.99	2372.25	932.06	3064.11	2291.55	213693_s_at	(1, 2), (1, 4), (1, 5), (3, 4), (3, 5)	ENSG00000185499	mucin 1, cell surface associated [Source:HGNC Symbol;Acc:HGNC:7508]	chr1	155185824	155192916	-1	q22	MUC1	68.01	protein_coding	4717
0.000523	0.0053	207.93	1528.56	497.71	2020.6	1419.26	207847_s_at	(1, 2), (1, 4), (1, 5), (3, 4), (3, 5)	ENSG00000185499	mucin 1, cell surface associated [Source:HGNC Symbol;Acc:HGNC:7508]	chr1	155185824	155192916	-1	q22	MUC1	68.01	protein_coding	4717
2.07e-05	0.000446	395.36	215.79	659.64	423.59	780.25	212148_at	(2, 3), (2, 5)	ENSG00000185630	PBX homeobox 1 [Source:HGNC Symbol;Acc:HGNC:8632]	chr1	164555584	164899296	1	q23.3	PBX1	41.67	protein_coding	21370
3.42e-05	0.000669	553.69	338.62	866.21	583.89	1028.03	212151_at	(2, 3), (2, 5), (4, 5)	ENSG00000185630	PBX homeobox 1 [Source:HGNC Symbol;Acc:HGNC:8632]	chr1	164555584	164899296	1	q23.3	PBX1	41.67	protein_coding	21370
7.1e-06	0.000191	67.28	54.97	112.22	68.91	165.88	205253_at	(2, 5), (4, 5)	ENSG00000185630	PBX homeobox 1 [Source:HGNC Symbol;Acc:HGNC:8632]	chr1	164555584	164899296	1	q23.3	PBX1	41.67	protein_coding	21370
0.0060942	0.0315	110.62	79.01	119.84	94.24	146.75	229903_x_at	(2, 5)	ENSG00000185946	RNA binding region (RNP1, RRM) containing 3 [Source:HGNC Symbol;Acc:HGNC:18666]	chr1	103525691	103555239	1	p21.1	RNPC3	35.03	protein_coding	6867
0.002936	0.0186	172.08	122.09	163.44	185.15	272.57	226975_at	(2, 5)	ENSG00000185946	RNA binding region (RNP1, RRM) containing 3 [Source:HGNC Symbol;Acc:HGNC:18666]	chr1	103525691	103555239	1	p21.1	RNPC3	35.03	protein_coding	6867
0.0001449	0.00198	56.2	49.43	44.55	57.75	34.73	228618_at	(5, 4)	ENSG00000187800	platelet endothelial aggregation receptor 1 [Source:HGNC Symbol;Acc:HGNC:33631]	chr1	156893698	156916429	1	q23.1	PEAR1	57.04	protein_coding	5525
6.6e-06	0.000181	68.86	246.92	58.15	48.07	74.27	1552846_s_at	(1, 2), (3, 2), (4, 2), (5, 2)	ENSG00000188060	RAB42, member RAS oncogene family [Source:HGNC Symbol;Acc:HGNC:28702]	chr1	28592200	28595449	1	p35.3	RAB42	58.15	protein_coding	2301
0.0074102	0.0361	159.96	344	168.31	250.62	280.85	217419_x_at	(3, 2), (3, 5)	ENSG00000188157	agrin [Source:HGNC Symbol;Acc:HGNC:329]	chr1	1020120	1056118	1	p36.33	AGRN	65.71	protein_coding	10761
0.0039463	0.0233	185.75	452.31	219.1	332.26	373.45	212285_s_at	(1, 2), (3, 2), (3, 5)	ENSG00000188157	agrin [Source:HGNC Symbol;Acc:HGNC:329]	chr1	1020120	1056118	1	p36.33	AGRN	65.71	protein_coding	10761
2.55e-05	0.00053	607.71	520.13	914.65	1634.53	1450.49	227998_at	(1, 4), (1, 5), (2, 4), (2, 5)	ENSG00000188643	S100 calcium binding protein A16 [Source:HGNC Symbol;Acc:HGNC:20441]	chr1	153606886	153613145	-1	q21.3	S100A16	57.24	protein_coding	1701
1.2e-06	4.72e-05	20.08	20.14	37.34	74.8	24.11	236083_at	(1, 4), (2, 4), (5, 4)	ENSG00000188761	BCL2 like 15 [Source:HGNC Symbol;Acc:HGNC:33624]	chr1	113876816	113887581	-1	p13.2	BCL2L15	41.52	protein_coding	9095
0.0004764	0.00493	26.08	34.75	48.97	84.99	34.11	236979_at	(1, 4), (2, 4), (5, 4)	ENSG00000188761	BCL2 like 15 [Source:HGNC Symbol;Acc:HGNC:33624]	chr1	113876816	113887581	-1	p13.2	BCL2L15	41.52	protein_coding	9095
1.4e-06	5.35e-05	7.61	9.26	14.82	31.23	10.09	242013_at	(1, 4), (2, 4), (3, 4), (5, 4)	ENSG00000188761	BCL2 like 15 [Source:HGNC Symbol;Acc:HGNC:33624]	chr1	113876816	113887581	-1	p13.2	BCL2L15	41.52	protein_coding	9095
2e-07	1.08e-05	387.69	644.51	599.44	613.78	1167.33	202598_at	(1, 5), (2, 5), (3, 5), (4, 5)	ENSG00000189171	S100 calcium binding protein A13 [Source:HGNC Symbol;Acc:HGNC:10490]	chr1	153618787	153631360	-1	q21.3	S100A13	50.76	protein_coding	2216
1.8e-06	6.51e-05	66.86	49.22	147.11	435.22	220.51	218677_at	(1, 4), (1, 5), (2, 3), (2, 4), (2, 5), (3, 4)	ENSG00000189334	S100 calcium binding protein A14 [Source:HGNC Symbol;Acc:HGNC:18901]	chr1	153614255	153616986	-1	q21.3	S100A14	57.25	protein_coding	1277
0.0012277	0.00988	143.73	174.57	139.19	231.32	118.49	202699_s_at	(5, 4)	ENSG00000196187	transmembrane protein 63A [Source:HGNC Symbol;Acc:HGNC:29118]	chr1	225845536	225882380	-1	q42.12	TMEM63A	51.62	protein_coding	10350
1.86e-05	0.00041	61.5	84.01	57.05	97.37	56.64	202700_s_at	(5, 2), (3, 4), (5, 4)	ENSG00000196187	transmembrane protein 63A [Source:HGNC Symbol;Acc:HGNC:29118]	chr1	225845536	225882380	-1	q42.12	TMEM63A	51.62	protein_coding	10350
< 1e-07	5.91e-06	48.1	15.12	36.57	295.6	23.16	205927_s_at	(2, 4), (3, 4), (5, 4)	ENSG00000196188	cathepsin E [Source:HGNC Symbol;Acc:HGNC:2530]	chr1	206008535	206023909	-1	q32.1	CTSE	43.82	protein_coding	3562
0.0014653	0.0112	19.99	46.06	26.38	21.91	31.35	234072_at	(1, 2), (3, 2), (4, 2)	ENSG00000196189	semaphorin 4A [Source:HGNC Symbol;Acc:HGNC:10729]	chr1	156147366	156177752	1	q22	SEMA4A	51.59	protein_coding	6771
0.0044953	0.0255	143.99	622.52	310.59	760.88	477.09	201926_s_at	(1, 2), (1, 4), (1, 5)	ENSG00000196352	CD55 molecule (Cromer blood group) [Source:HGNC Symbol;Acc:HGNC:2665]	chr1	207321532	207386804	1	q32.2	CD55	36.31	protein_coding	5752
0.0057724	0.0303	198.26	807.44	404.76	1010.17	630.17	1555950_a_at	(1, 2), (1, 4), (1, 5)	ENSG00000196352	CD55 molecule (Cromer blood group) [Source:HGNC Symbol;Acc:HGNC:2665]	chr1	207321532	207386804	1	q32.2	CD55	36.31	protein_coding	5752
0.0025286	0.0167	120.54	396.38	253.79	703.41	383.24	201925_s_at	(1, 4), (1, 5), (3, 4)	ENSG00000196352	CD55 molecule (Cromer blood group) [Source:HGNC Symbol;Acc:HGNC:2665]	chr1	207321532	207386804	1	q32.2	CD55	36.31	protein_coding	5752
0.0016445	0.0123	143.05	99.53	170.52	224.02	121.77	212978_at	(2, 4), (5, 4)	ENSG00000197147	leucine rich repeat containing 8 VRAC subunit B [Source:HGNC Symbol;Acc:HGNC:30692]	chr1	89524829	89597861	1	p22.2	LRRC8B	38.63	protein_coding	8267
0.0076529	0.0368	17.36	9.88	16.08	17.51	12.08	212976_at	(2, 4), (5, 4)	ENSG00000197147	leucine rich repeat containing 8 VRAC subunit B [Source:HGNC Symbol;Acc:HGNC:30692]	chr1	89524829	89597861	1	p22.2	LRRC8B	38.63	protein_coding	8267
0.0046398	0.0261	89.72	167.84	144.54	75.54	128.28	222537_s_at	(4, 2), (4, 3), (4, 5)	ENSG00000197622	CDC42 small effector 1 [Source:HGNC Symbol;Acc:HGNC:17719]	chr1	151050971	151070325	-1	q21.3	CDC42SE1	46.96	protein_coding	4184
5.32e-05	0.000933	15.63	23.43	19.26	81.54	30.55	228923_at	(1, 4), (2, 4), (3, 4), (5, 4)	ENSG00000197956	S100 calcium binding protein A6 [Source:HGNC Symbol;Acc:HGNC:10496]	chr1	153534599	153536244	-1	q21.3	S100A6	58.51	protein_coding	971
9.44e-05	0.00144	1131.41	2455.07	2004.92	4586.44	3478.66	217728_at	(1, 4), (1, 5), (3, 4), (3, 5)	ENSG00000197956	S100 calcium binding protein A6 [Source:HGNC Symbol;Acc:HGNC:10496]	chr1	153534599	153536244	-1	q21.3	S100A6	58.51	protein_coding	971
0.0016759	0.0124	313.07	203.44	240.4	285.02	192.6	201875_s_at	(5, 4)	ENSG00000197965	myelin protein zero like 1 [Source:HGNC Symbol;Acc:HGNC:7226]	chr1	167721192	167791919	1	q24.2	MPZL1	41.24	protein_coding	7069
0.0037518	0.0224	9.94	21.22	15.55	11.65	13.56	1552481_s_at	(1, 2), (4, 2), (5, 2)	ENSG00000198162	mannosidase alpha class 1A member 2 [Source:HGNC Symbol;Acc:HGNC:6822]	chr1	117367449	117528872	1	p12	MAN1A2	35.34	protein_coding	9667
0.0010067	0.0086	72.57	46.19	33.74	39.51	29.82	235126_at	(3, 1), (5, 1)	ENSG00000198468	FLVCR1 divergent transcript [Source:HGNC Symbol;Acc:HGNC:39077]	chr1	212852105	212858126	-1	q32.3	FLVCR1-DT	46.05	lncRNA	4270
0.0027855	0.0179	17.7	34.29	51.96	44.29	26	231118_at	(1, 3), (5, 3)	ENSG00000198483	ankyrin repeat domain 35 [Source:HGNC Symbol;Acc:HGNC:26323]	chr1	145866560	145885866	-1	q21.1	ANKRD35	48.17	protein_coding	3363
< 1e-07	< 1e-07	27.52	19.83	36.14	225.88	21	204714_s_at	(1, 4), (2, 4), (3, 4), (5, 4)	ENSG00000198734	coagulation factor V [Source:HGNC Symbol;Acc:HGNC:3542]	chr1	169511951	169586588	-1	q24.2	F5	38.05	protein_coding	9373
0.0019425	0.0138	28.91	16.55	21.77	16.74	25.2	217310_s_at	(2, 5), (4, 5)	ENSG00000198815	forkhead box J3 [Source:HGNC Symbol;Acc:HGNC:29178]	chr1	42176539	42335877	-1	p34.2	FOXJ3	38.57	protein_coding	6896
0.0022584	0.0154	37.82	13.41	18.67	16.39	25.25	1565951_s_at	(2, 1), (2, 5)	ENSG00000203668	CHM like Rab escort protein [Source:HGNC Symbol;Acc:HGNC:1941]	chr1	241628851	241640369	-1	q43	CHML	38.23	protein_coding	7778
0.0031814	0.0198	355.53	97.91	164.61	146.1	215.89	226350_at	(2, 1), (2, 5)	ENSG00000203668	CHM like Rab escort protein [Source:HGNC Symbol;Acc:HGNC:1941]	chr1	241628851	241640369	-1	q43	CHML	38.23	protein_coding	7778
< 1e-07	< 1e-07	20.13	13.39	32.92	392.19	19.61	229030_at	(1, 4), (2, 4), (3, 4), (5, 4)	ENSG00000203697	calpain 8 [Source:HGNC Symbol;Acc:HGNC:1485]	chr1	223538007	223665723	-1	q41	CAPN8	46.64	protein_coding	5174
0.0005281	0.00534	45.08	135.72	65.97	55.33	43.99	1558508_a_at	(4, 2), (5, 2)	ENSG00000203724	chromosome 1 open reading frame 53 [Source:HGNC Symbol;Acc:HGNC:30003]	chr1	197902630	197907367	1	q31.3	C1orf53	40.5	protein_coding	628
0.0086398	0.0402	41.78	19.21	33.09	48.28	27.25	229402_at	(2, 4), (5, 4)	ENSG00000203943	sterile alpha motif domain containing 13 [Source:HGNC Symbol;Acc:HGNC:24582]	chr1	84298366	84389957	1	p31.1	SAMD13	39.5	protein_coding	3405
0.0065069	0.0329	27.19	34.32	36.36	32.95	25.29	238787_at	(5, 3)	ENSG00000213047	DENN domain containing 1B [Source:HGNC Symbol;Acc:HGNC:28404]	chr1	197504748	197775696	-1	q31.3	DENND1B	34.32	protein_coding	13203
0.0020834	0.0145	73.11	79.54	116.89	105.38	67.48	228032_s_at	(5, 3), (5, 4)	ENSG00000213047	DENN domain containing 1B [Source:HGNC Symbol;Acc:HGNC:28404]	chr1	197504748	197775696	-1	q31.3	DENND1B	34.32	protein_coding	13203
0.0001609	0.00216	185.21	288.48	338.57	305.29	194.95	219696_at	(5, 3), (5, 4)	ENSG00000213047	DENN domain containing 1B [Source:HGNC Symbol;Acc:HGNC:28404]	chr1	197504748	197775696	-1	q31.3	DENND1B	34.32	protein_coding	13203
0.0022108	0.0152	34.63	127.37	42.7	49.03	53.69	220308_at	(1, 2), (3, 2), (4, 2), (5, 2)	ENSG00000213085	cilia and flagella associated protein 45 [Source:HGNC Symbol;Acc:HGNC:17229]	chr1	159872364	159900165	-1	q23.2	CFAP45	46.23	protein_coding	2627
0.0004311	0.00459	19.83	10.34	16.08	11.85	24.77	235599_at	(2, 5), (4, 5)	ENSG00000215808	long intergenic non-protein coding RNA 1139 [Source:HGNC Symbol;Acc:HGNC:27924]	chr1	238476542	238486060	-1	q43	LINC01139	38.21	lncRNA	5965
0.0057933	0.0304	36.32	15.81	13.85	96.42	31.04	239370_at	(2, 4), (3, 4), (5, 4)	ENSG00000224259	long intergenic non-protein coding RNA 1133 [Source:HGNC Symbol;Acc:HGNC:49447]	chr1	159958035	159984750	1	q23.2	LINC01133	45.81	lncRNA	3676
0.0004732	0.00491	94.28	56.08	73.86	71.83	120.61	1556181_at	(2, 5), (4, 5)	ENSG00000235098	ankyrin repeat domain 65 [Source:HGNC Symbol;Acc:HGNC:42950]	chr1	1418420	1421769	-1	p36.33	ANKRD65	66.51	protein_coding	2644
0.0014175	0.011	90.61	56.93	71.31	69.88	128.74	1556182_x_at	(2, 5)	ENSG00000235098	ankyrin repeat domain 65 [Source:HGNC Symbol;Acc:HGNC:42950]	chr1	1418420	1421769	-1	p36.33	ANKRD65	66.51	protein_coding	2644
< 1e-07	< 1e-07	116.41	891.62	48.19	70.44	19.25	206268_at	(5, 1), (3, 2), (4, 2), (5, 2), (5, 4)	ENSG00000243709	left-right determination factor 1 [Source:HGNC Symbol;Acc:HGNC:6552]	chr1	225886282	225911382	-1	q42.12	LEFTY1	50.49	protein_coding	1891
0.0024916	0.0165	2019.76	1564.05	775.1	563.25	1347.02	211456_x_at	(4, 1), (4, 2), (4, 5)	ENSG00000244020	metallothionein 1H like 1 [Source:HGNC Symbol;Acc:HGNC:31864]	chr1	237004103	237004441	-1	q43	MT1HL1	59	protein_coding	339
0.0006177	0.00603	108.04	106.88	68.81	512.13	133.77	227862_at	(2, 4), (3, 4), (5, 4)	ENSG00000253368	TMF1 regulated nuclear protein 1 [Source:HGNC Symbol;Acc:HGNC:34348]	chr1	26993692	27000886	1	p36.11	TRNP1	55.83	protein_coding	1979
0.0046734	0.0262	20.5	18.37	16.73	14.89	22.26	238094_at	(4, 5)	ENSG00000260063	novel transcript, antisense to ARID1A	chr1	26692132	26694131	-1	p36.11		50.95	lncRNA	2000
0.0053049	0.0286	757.25	2066.66	1296.3	1940.78	985.4	201008_s_at	(5, 2), (5, 4)	ENSG00000265972	thioredoxin interacting protein [Source:HGNC Symbol;Acc:HGNC:16952]	chr1	145992435	145996579	-1	q21.1	TXNIP	42.39	protein_coding	3604
0.0064724	0.0329	1052.08	2720.48	1580.23	2475.86	1266.82	201009_s_at	(5, 2), (5, 4)	ENSG00000265972	thioredoxin interacting protein [Source:HGNC Symbol;Acc:HGNC:16952]	chr1	145992435	145996579	-1	q21.1	TXNIP	42.39	protein_coding	3604
0.0035801	0.0216	1100.76	2820.84	1868.38	2585.61	1360.45	201010_s_at	(5, 2), (5, 4)	ENSG00000265972	thioredoxin interacting protein [Source:HGNC Symbol;Acc:HGNC:16952]	chr1	145992435	145996579	-1	q21.1	TXNIP	42.39	protein_coding	3604
0.0003807	0.00416	128.97	86.17	68.53	63.35	117.25	1556203_a_at	(3, 5), (4, 5)	ENSG00000266028	SLIT-ROBO Rho GTPase activating protein 2 [Source:HGNC Symbol;Acc:HGNC:19751]	chr1	206203346	206464436	1	q32.1	SRGAP2	42.75	protein_coding	15609
0.0008158	0.00736	60.34	41.83	34.49	34.35	63.82	1556202_at	(3, 5), (4, 5)	ENSG00000266028	SLIT-ROBO Rho GTPase activating protein 2 [Source:HGNC Symbol;Acc:HGNC:19751]	chr1	206203346	206464436	1	q32.1	SRGAP2	42.75	protein_coding	15609
0.000362	0.00402	66.72	90.47	80.54	121.98	67.13	235571_at	(5, 4)	ENSG00000284357	microRNA 34a [Source:HGNC Symbol;Acc:HGNC:31635]	chr1	9151668	9151777	-1	p36.22	MIR34A	50.91	miRNA	110
0.0076697	0.0369	391.85	924.65	751.75	733.49	924.14	200931_s_at	(1, 2), (1, 5)	ENSG00000035403	vinculin [Source:HGNC Symbol;Acc:HGNC:12665]	chr10	73995193	74121363	1	q22.2	VCL	41.45	protein_coding	9992
0.0026319	0.0171	493.96	806.92	477.77	468.14	440.8	217791_s_at	(3, 2), (4, 2), (5, 2)	ENSG00000059573	aldehyde dehydrogenase 18 family member A1 [Source:HGNC Symbol;Acc:HGNC:9722]	chr10	95605941	95656711	-1	q24.1	ALDH18A1	43.15	protein_coding	3759
0.0003076	0.00356	505.19	868.99	514.17	495.53	445.16	222416_at	(3, 2), (4, 2), (5, 2)	ENSG00000059573	aldehyde dehydrogenase 18 family member A1 [Source:HGNC Symbol;Acc:HGNC:9722]	chr10	95605941	95656711	-1	q24.1	ALDH18A1	43.15	protein_coding	3759
0.0002053	0.0026	92.43	20.7	65.54	29.54	81.68	210038_at	(2, 5), (4, 5)	ENSG00000065675	protein kinase C theta [Source:HGNC Symbol;Acc:HGNC:9410]	chr10	6427143	6580301	-1	p15.1	PRKCQ	43.1	protein_coding	3295
0.0014295	0.011	60.51	22.86	48.28	24.84	56.64	210039_s_at	(2, 5), (4, 5)	ENSG00000065675	protein kinase C theta [Source:HGNC Symbol;Acc:HGNC:9410]	chr10	6427143	6580301	-1	p15.1	PRKCQ	43.1	protein_coding	3295
0.0006939	0.00658	138.56	375.52	324.34	431.45	190.76	223058_at	(5, 4)	ENSG00000065809	family with sequence similarity 107 member B [Source:HGNC Symbol;Acc:HGNC:23726]	chr10	14518557	14774897	-1	p13	FAM107B	43.19	protein_coding	7019
0.0004841	0.00499	238.01	663.88	506.54	819.35	325.5	223059_s_at	(1, 4), (5, 4)	ENSG00000065809	family with sequence similarity 107 member B [Source:HGNC Symbol;Acc:HGNC:23726]	chr10	14518557	14774897	-1	p13	FAM107B	43.19	protein_coding	7019
0.0092624	0.0422	92.8	155.27	79.79	136.36	211.06	208228_s_at	(3, 5)	ENSG00000066468	fibroblast growth factor receptor 2 [Source:HGNC Symbol;Acc:HGNC:3689]	chr10	121478332	121598458	-1	q26.13	FGFR2	45.41	protein_coding	18813
0.0066189	0.0334	196.84	341.33	187.29	325.47	468.54	203638_s_at	(3, 5)	ENSG00000066468	fibroblast growth factor receptor 2 [Source:HGNC Symbol;Acc:HGNC:3689]	chr10	121478332	121598458	-1	q26.13	FGFR2	45.41	protein_coding	18813
0.0097903	0.044	21.22	23.48	24.21	20.38	32.74	240913_at	(4, 5)	ENSG00000066468	fibroblast growth factor receptor 2 [Source:HGNC Symbol;Acc:HGNC:3689]	chr10	121478332	121598458	-1	q26.13	FGFR2	45.41	protein_coding	18813
0.0011213	0.00925	78.97	49.64	116.21	138.61	59	212651_at	(2, 4), (5, 3), (5, 4)	ENSG00000072422	Rho related BTB domain containing 1 [Source:HGNC Symbol;Acc:HGNC:18738]	chr10	60869438	61001440	-1	q21.2	RHOBTB1	38.94	protein_coding	4779
0.0003272	0.00373	441.61	268.25	437.76	689.48	310.21	224755_at	(2, 4), (5, 4)	ENSG00000077147	transmembrane 9 superfamily member 3 [Source:HGNC Symbol;Acc:HGNC:21529]	chr10	96518110	96587452	-1	q24.1	TM9SF3	37.03	protein_coding	7494
3.11e-05	0.000626	872.59	1315.85	1372.51	1872.58	1016.64	222399_s_at	(1, 4), (5, 4)	ENSG00000077147	transmembrane 9 superfamily member 3 [Source:HGNC Symbol;Acc:HGNC:21529]	chr10	96518110	96587452	-1	q24.1	TM9SF3	37.03	protein_coding	7494
1.9e-06	6.78e-05	576.79	896.86	894.87	1292.73	687.88	217758_s_at	(1, 4), (5, 4)	ENSG00000077147	transmembrane 9 superfamily member 3 [Source:HGNC Symbol;Acc:HGNC:21529]	chr10	96518110	96587452	-1	q24.1	TM9SF3	37.03	protein_coding	7494
7.9e-06	0.000208	51.29	127	68.85	91.69	112.24	207535_s_at	(1, 2), (1, 5), (3, 2), (3, 5)	ENSG00000077150	nuclear factor kappa B subunit 2 [Source:HGNC Symbol;Acc:HGNC:7795]	chr10	102394110	102402524	1	q24.32	NFKB2	61.37	protein_coding	4714
0.0019853	0.014	201.64	110	83.09	73.1	107.29	1563321_s_at	(3, 1), (4, 1), (5, 1), (4, 5)	ENSG00000078403	MLLT10 histone lysine methyltransferase DOT1L cofactor [Source:HGNC Symbol;Acc:HGNC:16063]	chr10	21524646	21743630	1	p12.31	MLLT10	39.77	protein_coding	9130
0.0040043	0.0235	398.92	218.13	197.14	161.4	223.39	225992_at	(3, 1), (4, 1), (5, 1)	ENSG00000078403	MLLT10 histone lysine methyltransferase DOT1L cofactor [Source:HGNC Symbol;Acc:HGNC:16063]	chr10	21524646	21743630	1	p12.31	MLLT10	39.77	protein_coding	9130
0.0064762	0.0329	127.47	69.78	63.63	51.55	78.07	205408_at	(4, 1), (4, 5)	ENSG00000078403	MLLT10 histone lysine methyltransferase DOT1L cofactor [Source:HGNC Symbol;Acc:HGNC:16063]	chr10	21524646	21743630	1	p12.31	MLLT10	39.77	protein_coding	9130
2.7e-06	9.07e-05	67.03	57.56	37.15	96.69	37.06	219194_at	(3, 4), (5, 4)	ENSG00000095539	semaphorin 4G [Source:HGNC Symbol;Acc:HGNC:10735]	chr10	100969518	100985871	1	q24.31	SEMA4G	52.88	protein_coding	5253
5.1e-06	0.000149	28.77	329.99	109.9	215.49	70.59	207655_s_at	(1, 2), (1, 4), (5, 2), (5, 4)	ENSG00000095585	B cell linker [Source:HGNC Symbol;Acc:HGNC:14211]	chr10	96189171	96271587	-1	q24.1	BLNK	42.63	protein_coding	6186
0.0006884	0.00654	103.61	98.55	305.95	123.24	56.74	203304_at	(5, 3)	ENSG00000095739	BMP and activin membrane bound inhibitor [Source:HGNC Symbol;Acc:HGNC:30251]	chr10	28677510	28682932	1	p12.1	BAMBI	46.04	protein_coding	2139
0.0054648	0.0291	331.45	287.92	365.08	196.56	321.66	219679_s_at	(4, 3), (4, 5)	ENSG00000095787	WW domain containing adaptor with coiled-coil [Source:HGNC Symbol;Acc:HGNC:17327]	chr10	28532493	28623112	1	p12.1	WAC	37.79	protein_coding	12780
0.0002365	0.0029	480.29	399.82	1011.74	1384.49	900.09	200965_s_at	(1, 4), (2, 3), (2, 4), (2, 5)	ENSG00000099204	actin binding LIM protein 1 [Source:HGNC Symbol;Acc:HGNC:78]	chr10	114431113	114768061	-1	q25.3	ABLIM1	42.03	protein_coding	10231
0.0034404	0.021	57.69	141.38	40.61	55.55	48.32	210510_s_at	(3, 2), (4, 2), (5, 2)	ENSG00000099250	neuropilin 1 [Source:HGNC Symbol;Acc:HGNC:8004]	chr10	33177492	33336262	-1	p11.22	NRP1	41.34	protein_coding	11522
0.0033654	0.0206	168.43	336.28	140.14	178.04	123	212298_at	(5, 2)	ENSG00000099250	neuropilin 1 [Source:HGNC Symbol;Acc:HGNC:8004]	chr10	33177492	33336262	-1	p11.22	NRP1	41.34	protein_coding	11522
0.0027732	0.0179	61.54	121.07	79.35	197.02	108.68	218693_at	(1, 4), (3, 4), (5, 4)	ENSG00000099282	tetraspanin 15 [Source:HGNC Symbol;Acc:HGNC:23298]	chr10	69451465	69507666	1	q22.1	TSPAN15	51.45	protein_coding	2651
0.0077551	0.0372	70.43	69.97	65.13	41.44	40.84	229091_s_at		ENSG00000107443	cyclin J [Source:HGNC Symbol;Acc:HGNC:23434]	chr10	96043394	96060870	1	q24.1	CCNJ	39.76	protein_coding	4148
0.0004396	0.00466	17.37	26.63	23.02	19.54	14.53	213744_at	(5, 2), (5, 3)	ENSG00000107518	attractin like 1 [Source:HGNC Symbol;Acc:HGNC:29063]	chr10	115093365	115948999	1	q25.3	ATRNL1	35.41	protein_coding	9957
1.05e-05	0.000264	1192.58	1134.48	1107.73	966.33	1857.86	225010_at	(2, 5), (3, 5), (4, 5)	ENSG00000108091	coiled-coil domain containing 6 [Source:HGNC Symbol;Acc:HGNC:18782]	chr10	59788747	59906556	-1	q21.2	CCDC6	40.9	protein_coding	7261
6.79e-05	0.00113	509.73	1224.67	547.14	443.21	280.13	203335_at	(5, 2)	ENSG00000107537	phytanoyl-CoA 2-hydroxylase [Source:HGNC Symbol;Acc:HGNC:8940]	chr10	13277796	13302412	-1	p13	PHYH	46.07	protein_coding	3377
4e-07	1.89e-05	100.99	203.34	188.53	239.87	99.48	212838_at	(1, 4), (5, 2), (5, 3), (5, 4)	ENSG00000107554	dynamin binding protein [Source:HGNC Symbol;Acc:HGNC:30373]	chr10	99875577	100009947	-1	q24.2	DNMBP	43.71	protein_coding	8489
1.5e-05	0.000348	249.33	230.48	256.53	183.64	440.38	204716_at	(2, 5), (3, 5), (4, 5)	ENSG00000108091	coiled-coil domain containing 6 [Source:HGNC Symbol;Acc:HGNC:18782]	chr10	59788747	59906556	-1	q21.2	CCDC6	40.9	protein_coding	7261
0.0036846	0.0221	99.19	160.72	135.32	131.76	87.09	202444_s_at	(5, 2)	ENSG00000107566	ER lipid raft associated 1 [Source:HGNC Symbol;Acc:HGNC:16947]	chr10	100150094	100186033	-1	q24.31	ERLIN1	38.15	protein_coding	3491
6.4e-06	0.000176	135.09	128.88	165.71	168.72	101.29	225497_at	(5, 3), (5, 4)	ENSG00000107669	arginyltransferase 1 [Source:HGNC Symbol;Acc:HGNC:782]	chr10	121740424	121928492	-1	q26.13	ATE1	39.06	protein_coding	5385
0.0015464	0.0117	292.21	138.68	221.76	180.64	160.02	211376_s_at	(2, 1), (5, 1), (2, 3), (5, 3)	ENSG00000107672	NSE4 homolog A, SMC5-SMC6 complex component [Source:HGNC Symbol;Acc:HGNC:25935]	chr10	121957091	121975217	-1	q26.13	NSMCE4A	43.85	protein_coding	3543
0.0065141	0.033	256.97	140.03	201.63	173.16	144.05	219067_s_at	(5, 1)	ENSG00000107672	NSE4 homolog A, SMC5-SMC6 complex component [Source:HGNC Symbol;Acc:HGNC:25935]	chr10	121957091	121975217	-1	q26.13	NSMCE4A	43.85	protein_coding	3543
1e-07	5.91e-06	464.02	446.7	768.33	508.43	317.57	226247_at	(5, 3), (5, 4)	ENSG00000107679	pleckstrin homology domain containing A1 [Source:HGNC Symbol;Acc:HGNC:14335]	chr10	122374696	122442602	1	q26.13	PLEKHA1	37.12	protein_coding	23986
< 1e-07	< 1e-07	277.6	246.98	427.52	255.13	159.67	219024_at	(5, 3), (5, 4)	ENSG00000107679	pleckstrin homology domain containing A1 [Source:HGNC Symbol;Acc:HGNC:14335]	chr10	122374696	122442602	1	q26.13	PLEKHA1	37.12	protein_coding	23986
0.00041	0.00441	47.42	40.32	36.69	36.83	56.67	202523_s_at	(3, 5), (4, 5)	ENSG00000107742	SPARC (osteonectin), cwcv and kazal like domains proteoglycan 2 [Source:HGNC Symbol;Acc:HGNC:13564]	chr10	72059034	72089032	-1	q22.1	SPOCK2	55.97	protein_coding	6411
9.2e-06	0.000236	96.29	49.39	72.03	54.91	134.14	227276_at	(2, 5), (3, 5), (4, 5)	ENSG00000120594	plexin domain containing 2 [Source:HGNC Symbol;Acc:HGNC:21013]	chr10	19816239	20289856	1	p12.31	PLXDC2	37.34	protein_coding	12567
0.001262	0.0101	91.99	165.13	110.61	76.79	99.18	209378_s_at	(4, 2), (5, 2)	ENSG00000107771	coiled-coil serine rich protein 2 [Source:HGNC Symbol;Acc:HGNC:29197]	chr10	84328586	84518521	1	q23.1	CCSER2	37.56	protein_coding	8424
0.0061659	0.0318	111.29	120.11	158.05	145.48	88.46	209585_s_at	(5, 3)	ENSG00000107789	multiple inositol-polyphosphate phosphatase 1 [Source:HGNC Symbol;Acc:HGNC:7102]	chr10	87504875	87553461	1	q23.2	MINPP1	38.05	protein_coding	3017
0.007144	0.0352	41.48	29.17	45.23	39.03	31.71	221000_s_at	(2, 3), (5, 3)	ENSG00000107821	Kazal type serine peptidase inhibitor domain 1 [Source:HGNC Symbol;Acc:HGNC:25460]	chr10	101061989	101068131	1	q24.31	KAZALD1	58.72	protein_coding	4171
0.0050444	0.0277	216.71	436.88	291.34	342.58	246.54	225663_at	(5, 2)	ENSG00000107897	acyl-CoA binding domain containing 5 [Source:HGNC Symbol;Acc:HGNC:23338]	chr10	27168135	27243046	-1	p12.1	ACBD5	41.24	protein_coding	11794
0.0038705	0.0229	1399.39	1116.99	2767.21	1540.77	1740.38	215111_s_at	(2, 3), (4, 3), (5, 3)	ENSG00000102804	TSC22 domain family member 1 [Source:HGNC Symbol;Acc:HGNC:16826]	chr13	44432143	44577147	-1	q14.11	TSC22D1	38.08	protein_coding	8586
0.0022348	0.0153	150.4	161.19	172.51	107.44	177.78	218947_s_at	(4, 3), (4, 5)	ENSG00000107951	mitochondrial poly(A) polymerase [Source:HGNC Symbol;Acc:HGNC:25532]	chr10	30309801	30374448	-1	p11.23	MTPAP	43.36	protein_coding	8341
< 1e-07	< 1e-07	44.88	207.21	41.95	38.84	99.65	235421_at	(1, 2), (3, 2), (4, 2), (5, 2), (3, 5), (4, 5)	ENSG00000107968	mitogen-activated protein kinase kinase kinase 8 [Source:HGNC Symbol;Acc:HGNC:6860]	chr10	30434021	30461833	1	p11.23	MAP3K8	42.62	protein_coding	3517
0.0002645	0.00316	25.84	78.39	35.22	25.9	56.19	205027_s_at	(1, 2), (4, 2), (4, 5)	ENSG00000107968	mitogen-activated protein kinase kinase kinase 8 [Source:HGNC Symbol;Acc:HGNC:6860]	chr10	30434021	30461833	1	p11.23	MAP3K8	42.62	protein_coding	3517
0.0068387	0.0341	302.85	287.01	286.3	381.42	243.39	208453_s_at	(5, 4)	ENSG00000108039	X-prolyl aminopeptidase 1 [Source:HGNC Symbol;Acc:HGNC:12822]	chr10	109864766	109923553	-1	q25.1	XPNPEP1	44.62	protein_coding	6691
4.6e-05	0.000834	83.5	84.79	85.03	88.5	159.08	221565_s_at	(2, 5), (3, 5), (4, 5)	ENSG00000138172	calcium homeostasis modulator family member 2 [Source:HGNC Symbol;Acc:HGNC:23493]	chr10	103446786	103452402	-1	q24.33	CALHM2	55.67	protein_coding	3108
1.69e-05	0.000383	77.73	73.04	73.67	77.77	141.24	57715_at	(2, 5), (3, 5), (4, 5)	ENSG00000138172	calcium homeostasis modulator family member 2 [Source:HGNC Symbol;Acc:HGNC:23493]	chr10	103446786	103452402	-1	q24.33	CALHM2	55.67	protein_coding	3108
3.56e-05	0.000689	32.4	127.24	77.82	139.32	43.07	219543_at	(1, 4), (5, 2), (5, 4)	ENSG00000108187	phenazine biosynthesis like protein domain containing [Source:HGNC Symbol;Acc:HGNC:23301]	chr10	68282660	68333049	-1	q21.3	PBLD	43.3	protein_coding	5172
0.0057298	0.0301	175.26	239.19	242.36	223.05	164.58	203327_at	(5, 3)	ENSG00000119912	insulin degrading enzyme [Source:HGNC Symbol;Acc:HGNC:5381]	chr10	92451684	92574096	-1	q23.33	IDE	40.71	protein_coding	16811
0.0034957	0.0212	118.4	205.48	161.54	126.19	114.81	203328_x_at	(5, 2)	ENSG00000119912	insulin degrading enzyme [Source:HGNC Symbol;Acc:HGNC:5381]	chr10	92451684	92574096	-1	q23.33	IDE	40.71	protein_coding	16811
0.0016032	0.0121	303.46	353.17	161.77	262.39	552.94	229450_at	(3, 5)	ENSG00000119917	interferon induced protein with tetratricopeptide repeats 3 [Source:HGNC Symbol;Acc:HGNC:5411]	chr10	89327307	89377473	1	q23.31	IFIT3	42.34	protein_coding	5067
0.0028001	0.018	88.83	128.02	78.22	95.16	195.47	226757_at	(3, 5)	ENSG00000119922	interferon induced protein with tetratricopeptide repeats 2 [Source:HGNC Symbol;Acc:HGNC:5409]	chr10	89283694	89309271	1	q23.31	IFIT2	42.26	protein_coding	4326
0.007023	0.0348	33.2	46.13	38.67	37.86	66.75	217502_at		ENSG00000119922	interferon induced protein with tetratricopeptide repeats 2 [Source:HGNC Symbol;Acc:HGNC:5409]	chr10	89283694	89309271	1	q23.31	IFIT2	42.26	protein_coding	4326
5.29e-05	0.000929	66.03	74.87	78.75	47.12	45.3	219240_s_at	(5, 2), (4, 3), (5, 3)	ENSG00000119965	chromosome 10 open reading frame 88 [Source:HGNC Symbol;Acc:HGNC:25822]	chr10	122930901	122954311	-1	q26.13	C10orf88	36.12	protein_coding	3083
0.0007092	0.00668	210.69	344.85	271.82	209.37	206.1	212123_at	(4, 2), (5, 2)	ENSG00000119977	tectonic family member 3 [Source:HGNC Symbol;Acc:HGNC:24519]	chr10	95659823	95694143	-1	q24.1	TCTN3	39.92	protein_coding	9465
0.0010216	0.00869	331.5	520.14	429.87	300.37	299.93	212121_at	(4, 2), (5, 2), (5, 3)	ENSG00000119977	tectonic family member 3 [Source:HGNC Symbol;Acc:HGNC:24519]	chr10	95659823	95694143	-1	q24.1	TCTN3	39.92	protein_coding	9465
0.0004077	0.0044	146.22	323.75	117.91	161.34	122.01	218631_at	(3, 2), (5, 2)	ENSG00000119986	arginine vasopressin induced 1 [Source:HGNC Symbol;Acc:HGNC:30898]	chr10	97677424	97687241	-1	q24.2	AVPI1	48.89	protein_coding	1375
0.0061994	0.0319	42.85	62.11	48.21	49.57	40.54	55662_at	(5, 2)	ENSG00000120029	armadillo like helical domain containing 3 [Source:HGNC Symbol;Acc:HGNC:25788]	chr10	101845599	102056193	-1	q24.32	ARMH3	42.35	protein_coding	4747
0.0026393	0.0172	53.01	83.71	54.51	30.64	63.65	228468_at	(4, 2), (4, 5)	ENSG00000120539	microtubule associated serine/threonine kinase like [Source:HGNC Symbol;Acc:HGNC:19042]	chr10	27154824	27187953	1	p12.1	MASTL	41.56	protein_coding	4660
0.0058662	0.0306	95.08	146.63	159.53	172.76	213.13	232046_at	(1, 5)	ENSG00000120549	KIAA1217 [Source:HGNC Symbol;Acc:HGNC:25428]	chr10	23694746	24547848	1	p12.2	KIAA1217	40.56	protein_coding	10807
0.0007977	0.00724	36.36	23.09	32.38	19.56	48.36	238455_at	(2, 5), (4, 5)	ENSG00000120594	plexin domain containing 2 [Source:HGNC Symbol;Acc:HGNC:21013]	chr10	19816239	20289856	1	p12.31	PLXDC2	37.34	protein_coding	12567
0.0005202	0.00528	42.89	31.96	47.73	33.66	68.6	227995_at	(2, 5), (4, 5)	ENSG00000120594	plexin domain containing 2 [Source:HGNC Symbol;Acc:HGNC:21013]	chr10	19816239	20289856	1	p12.31	PLXDC2	37.34	protein_coding	12567
1.88e-05	0.000414	57.93	47.33	54.83	62.19	107.59	223703_at	(2, 5), (3, 5), (4, 5)	ENSG00000148655	leucine rich melanocyte differentiation associated [Source:HGNC Symbol;Acc:HGNC:23405]	chr10	75431624	76560168	1	q22.2	LRMDA	41.11	protein_coding	6390
0.0004919	0.00505	61.47	37.4	57.13	47.54	87.24	214807_at	(2, 5), (4, 5)	ENSG00000120594	plexin domain containing 2 [Source:HGNC Symbol;Acc:HGNC:21013]	chr10	19816239	20289856	1	p12.31	PLXDC2	37.34	protein_coding	12567
0.0005965	0.00586	24.01	18.95	21.96	16.76	35.26	236297_at	(4, 5)	ENSG00000120594	plexin domain containing 2 [Source:HGNC Symbol;Acc:HGNC:21013]	chr10	19816239	20289856	1	p12.31	PLXDC2	37.34	protein_coding	12567
0.0009872	0.00849	130.63	87.59	156.65	109.16	223.38	226865_at	(2, 5), (4, 5)	ENSG00000120594	plexin domain containing 2 [Source:HGNC Symbol;Acc:HGNC:21013]	chr10	19816239	20289856	1	p12.31	PLXDC2	37.34	protein_coding	12567
0.0029974	0.0189	141.39	148.9	104.01	223.16	193.4	214783_s_at	(3, 4), (3, 5)	ENSG00000122359	annexin A11 [Source:HGNC Symbol;Acc:HGNC:535]	chr10	80150889	80205572	-1	q22.3	ANXA11	50.39	protein_coding	8513
0.0056826	0.03	77.52	113.35	66.68	60.49	63.48	32094_at	(3, 2), (4, 2), (5, 2)	ENSG00000122863	carbohydrate sulfotransferase 3 [Source:HGNC Symbol;Acc:HGNC:1971]	chr10	71964395	72013558	1	q22.1	CHST3	51.37	protein_coding	6934
0.0085499	0.0399	75	121.49	65.7	60.11	63.33	209834_at	(3, 2), (4, 2), (5, 2)	ENSG00000122863	carbohydrate sulfotransferase 3 [Source:HGNC Symbol;Acc:HGNC:1971]	chr10	71964395	72013558	1	q22.1	CHST3	51.37	protein_coding	6934
6.53e-05	0.00109	16.54	53.06	16.9	19.29	20.02	220580_at	(1, 2), (3, 2), (4, 2), (5, 2)	ENSG00000122870	BicC family RNA binding protein 1 [Source:HGNC Symbol;Acc:HGNC:19351]	chr10	58512872	58831435	1	q21.1	BICC1	38	protein_coding	6835
0.0007383	0.00685	188.42	110.57	109.33	239.64	239.27	202073_at	(2, 5), (3, 4), (3, 5)	ENSG00000123240	optineurin [Source:HGNC Symbol;Acc:HGNC:17142]	chr10	13099449	13138308	1	p13	OPTN	42.4	protein_coding	5138
8.1e-06	0.000212	263.87	232.68	137.95	344.13	360.16	202074_s_at	(3, 4), (3, 5)	ENSG00000123240	optineurin [Source:HGNC Symbol;Acc:HGNC:17142]	chr10	13099449	13138308	1	p13	OPTN	42.4	protein_coding	5138
0.0074052	0.0361	33.01	85.53	44.63	26.19	68.1	219064_at	(4, 2), (4, 5)	ENSG00000123243	inter-alpha-trypsin inhibitor heavy chain 5 [Source:HGNC Symbol;Acc:HGNC:21449]	chr10	7559270	7666998	-1	p14	ITIH5	43.72	protein_coding	14628
0.0025052	0.0166	93.3	70.08	187.68	133.5	84.66	221840_at	(2, 3), (5, 3)	ENSG00000132334	protein tyrosine phosphatase receptor type E [Source:HGNC Symbol;Acc:HGNC:9669]	chr10	127907103	128085855	1	q26.2	PTPRE	47.88	protein_coding	11193
0.0040383	0.0237	256.44	97.29	191.89	167.56	174.25	224780_at	(2, 1), (2, 3), (2, 5)	ENSG00000134453	RNA binding motif protein 17 [Source:HGNC Symbol;Acc:HGNC:16944]	chr10	6089034	6117457	1	p15.1	RBM17	41.2	protein_coding	6372
3.04e-05	0.000615	391.44	199.14	129.04	70.7	222.53	219298_at	(4, 1), (4, 2), (4, 5)	ENSG00000134463	enoyl-CoA hydratase domain containing 3 [Source:HGNC Symbol;Acc:HGNC:23489]	chr10	11742366	11764070	1	p14	ECHDC3	47.51	protein_coding	2185
0.002301	0.0156	535.9	604.28	532.91	740.58	422.09	222620_s_at	(5, 4)	ENSG00000136770	DnaJ heat shock protein family (Hsp40) member C1 [Source:HGNC Symbol;Acc:HGNC:20090]	chr10	21756548	22003769	-1	p12.31	DNAJC1	37.73	protein_coding	2490
0.0077981	0.0373	193.17	229.11	198.64	280.92	163.43	222621_at	(5, 4)	ENSG00000136770	DnaJ heat shock protein family (Hsp40) member C1 [Source:HGNC Symbol;Acc:HGNC:20090]	chr10	21756548	22003769	-1	p12.31	DNAJC1	37.73	protein_coding	2490
0.0001906	0.00244	143.97	845.34	331.73	301.45	550.34	211864_s_at	(1, 2), (1, 5), (3, 2), (4, 2)	ENSG00000138119	myoferlin [Source:HGNC Symbol;Acc:HGNC:3656]	chr10	93306429	93482334	-1	q23.33	MYOF	44.36	protein_coding	8490
0.000136	0.00189	41.27	155.71	69.98	75.93	118.65	217518_at	(1, 2), (1, 5), (3, 2), (3, 5)	ENSG00000138119	myoferlin [Source:HGNC Symbol;Acc:HGNC:3656]	chr10	93306429	93482334	-1	q23.33	MYOF	44.36	protein_coding	8490
0.0001174	0.0017	285.41	1607.15	649.14	634.32	1042.55	201798_s_at	(1, 2), (1, 5), (3, 2), (4, 2)	ENSG00000138119	myoferlin [Source:HGNC Symbol;Acc:HGNC:3656]	chr10	93306429	93482334	-1	q23.33	MYOF	44.36	protein_coding	8490
0.0027491	0.0177	59.85	54.03	77.68	78.74	122.09	227145_at	(2, 5)	ENSG00000138131	lysyl oxidase like 4 [Source:HGNC Symbol;Acc:HGNC:17171]	chr10	98247690	98268194	-1	q24.2	LOXL4	53.19	protein_coding	3597
0.0054232	0.029	38.81	34.3	37.77	47.09	27.8	227606_s_at	(5, 4)	ENSG00000138134	STAM binding protein like 1 [Source:HGNC Symbol;Acc:HGNC:24105]	chr10	88879734	88975153	1	q23.31	STAMBPL1	39.34	protein_coding	6323
0.0017204	0.0126	80.21	110.63	170.07	173.25	86.94	211382_s_at	(5, 3), (5, 4)	ENSG00000138162	transforming acidic coiled-coil containing protein 2 [Source:HGNC Symbol;Acc:HGNC:11523]	chr10	121989163	122254545	1	q26.13	TACC2	48.29	protein_coding	18855
0.0002831	0.00332	115.95	158.65	260.55	262.08	113.33	202289_s_at	(5, 3), (5, 4)	ENSG00000138162	transforming acidic coiled-coil containing protein 2 [Source:HGNC Symbol;Acc:HGNC:11523]	chr10	121989163	122254545	1	q26.13	TACC2	48.29	protein_coding	18855
5.7e-05	0.000987	17.65	15.64	19.39	20.81	79.65	205363_at	(2, 5), (3, 5), (4, 5)	ENSG00000129151	gamma-butyrobetaine hydroxylase 1 [Source:HGNC Symbol;Acc:HGNC:964]	chr11	27040725	27127809	1	p14.2	BBOX1	37.38	protein_coding	2464
3e-07	1.49e-05	180.48	156.85	146.8	124.47	247.79	203620_s_at	(2, 5), (3, 5), (4, 5)	ENSG00000137478	FCH and double SH3 domains 2 [Source:HGNC Symbol;Acc:HGNC:29114]	chr11	72836745	73142318	-1	q13.4	FCHSD2	38.88	protein_coding	5245
0.0032583	0.0201	107.29	156.86	151.32	198.3	116.1	226259_at	(5, 4)	ENSG00000138190	exocyst complex component 6 [Source:HGNC Symbol;Acc:HGNC:23196]	chr10	92826831	93059493	1	q23.33	EXOC6	37.57	protein_coding	6487
0.0084432	0.0396	34.19	12.88	37.38	67.3	34.03	205111_s_at	(2, 4), (2, 5)	ENSG00000138193	phospholipase C epsilon 1 [Source:HGNC Symbol;Acc:HGNC:17175]	chr10	93993931	94332823	1	q23.33	PLCE1	41.12	protein_coding	13679
< 1e-07	< 1e-07	14.32	627.03	20.09	38.33	14.84	219140_s_at	(1, 2), (3, 2), (4, 2), (5, 2), (5, 4)	ENSG00000138207	retinol binding protein 4 [Source:HGNC Symbol;Acc:HGNC:9922]	chr10	93591687	93601744	-1	q23.33	RBP4	49.28	protein_coding	1458
0.0029194	0.0185	317.27	280.08	162.99	259.76	290.83	210094_s_at	(3, 5)	ENSG00000148498	par-3 family cell polarity regulator [Source:HGNC Symbol;Acc:HGNC:16051]	chr10	34109560	34815325	-1	p11.21	PARD3	40.01	protein_coding	6513
0.0090738	0.0416	315.52	270.55	171.76	239.31	284.02	221526_x_at	(3, 5)	ENSG00000148498	par-3 family cell polarity regulator [Source:HGNC Symbol;Acc:HGNC:16051]	chr10	34109560	34815325	-1	p11.21	PARD3	40.01	protein_coding	6513
0.0021178	0.0147	63.19	47.18	35.02	46.6	63.71	221280_s_at	(3, 5)	ENSG00000148498	par-3 family cell polarity regulator [Source:HGNC Symbol;Acc:HGNC:16051]	chr10	34109560	34815325	-1	p11.21	PARD3	40.01	protein_coding	6513
0.0091445	0.0418	122.4	417.93	137	110.63	139.05	208078_s_at	(3, 2), (4, 2), (5, 2)	ENSG00000148516	zinc finger E-box binding homeobox 1 [Source:HGNC Symbol;Acc:HGNC:11642]	chr10	31318495	31529814	1	p11.22	ZEB1	36.04	protein_coding	8650
8.18e-05	0.00129	145.36	62.16	76.43	83.23	145.58	218665_at	(2, 5), (3, 5), (4, 5)	ENSG00000174804	frizzled class receptor 4 [Source:HGNC Symbol;Acc:HGNC:4042]	chr11	86945679	86955395	-1	q14.2	FZD4	45.44	protein_coding	7387
0.0028317	0.0181	145.67	35.67	66.5	95.52	200.08	203571_s_at	(2, 5)	ENSG00000148671	adipogenesis regulatory factor [Source:HGNC Symbol;Acc:HGNC:24043]	chr10	86968432	86983934	1	q23.2	ADIRF	49.56	protein_coding	758
0.0041629	0.0242	1558.97	694.18	1392.64	1674.1	1165.88	201034_at	(2, 3), (2, 4), (2, 5)	ENSG00000148700	adducin 3 [Source:HGNC Symbol;Acc:HGNC:245]	chr10	109996368	110135565	1	q25.1	ADD3	38.65	protein_coding	6539
0.0069857	0.0346	1587.76	788.71	1479.6	1838.5	1212.7	201753_s_at	(2, 3), (2, 4)	ENSG00000148700	adducin 3 [Source:HGNC Symbol;Acc:HGNC:245]	chr10	109996368	110135565	1	q25.1	ADD3	38.65	protein_coding	6539
2.45e-05	0.000514	45.84	24.87	24.8	110.46	18.02	206010_at	(2, 4), (3, 4), (5, 4)	ENSG00000148702	hyaluronan binding protein 2 [Source:HGNC Symbol;Acc:HGNC:4798]	chr10	113550837	113589602	1	q25.3	HABP2	46.71	protein_coding	3630
< 1e-07	< 1e-07	481.36	92.57	236.92	440.58	252.51	216037_x_at	(2, 1), (5, 1), (2, 3), (2, 4), (2, 5), (3, 4), (5, 4)	ENSG00000148737	transcription factor 7 like 2 [Source:HGNC Symbol;Acc:HGNC:11641]	chr10	112950247	113167678	1	q25.2	TCF7L2	44.6	protein_coding	6739
2e-07	1.08e-05	457.98	85.23	217.05	411.41	240.16	212762_s_at	(2, 1), (2, 3), (2, 4), (2, 5), (3, 4), (5, 4)	ENSG00000148737	transcription factor 7 like 2 [Source:HGNC Symbol;Acc:HGNC:11641]	chr10	112950247	113167678	1	q25.2	TCF7L2	44.6	protein_coding	6739
< 1e-07	< 1e-07	1630.73	314.22	854.45	1536.42	896.3	212761_at	(2, 1), (2, 3), (2, 4), (2, 5), (3, 4), (5, 4)	ENSG00000148737	transcription factor 7 like 2 [Source:HGNC Symbol;Acc:HGNC:11641]	chr10	112950247	113167678	1	q25.2	TCF7L2	44.6	protein_coding	6739
< 1e-07	< 1e-07	492.83	71.66	224.47	433.13	249.09	216511_s_at	(2, 1), (2, 3), (2, 4), (2, 5), (3, 4), (5, 4)	ENSG00000148737	transcription factor 7 like 2 [Source:HGNC Symbol;Acc:HGNC:11641]	chr10	112950247	113167678	1	q25.2	TCF7L2	44.6	protein_coding	6739
< 1e-07	< 1e-07	544.31	102.79	270.32	498.05	294.82	216035_x_at	(2, 1), (2, 3), (2, 4), (2, 5), (3, 4), (5, 4)	ENSG00000148737	transcription factor 7 like 2 [Source:HGNC Symbol;Acc:HGNC:11641]	chr10	112950247	113167678	1	q25.2	TCF7L2	44.6	protein_coding	6739
6.6e-06	0.000181	263	65.12	117.97	255.3	147.01	236094_at	(2, 1), (2, 4), (2, 5), (3, 4), (5, 4)	ENSG00000148737	transcription factor 7 like 2 [Source:HGNC Symbol;Acc:HGNC:11641]	chr10	112950247	113167678	1	q25.2	TCF7L2	44.6	protein_coding	6739
0.0004343	0.00461	30.35	32.73	57.98	61.25	22.22	205502_at	(5, 3), (5, 4)	ENSG00000148795	cytochrome P450 family 17 subfamily A member 1 [Source:HGNC Symbol;Acc:HGNC:2593]	chr10	102830531	102837472	-1	q24.32	CYP17A1	52.49	protein_coding	3384
< 1e-07	< 1e-07	23.78	15.22	23.66	29.89	94.27	238778_at	(1, 5), (2, 5), (3, 5), (4, 5)	ENSG00000150054	membrane palmitoylated protein 7 [Source:HGNC Symbol;Acc:HGNC:26542]	chr10	28050993	28334486	-1	p12.1	MPP7	38.78	protein_coding	6371
1e-07	5.91e-06	45.9	43.15	55.61	50.32	96.85	1564308_a_at	(1, 5), (2, 5), (3, 5), (4, 5)	ENSG00000150054	membrane palmitoylated protein 7 [Source:HGNC Symbol;Acc:HGNC:26542]	chr10	28050993	28334486	-1	p12.1	MPP7	38.78	protein_coding	6371
< 1e-07	< 1e-07	23.29	19.3	25.01	27.51	62.55	238451_at	(1, 5), (2, 5), (3, 5), (4, 5)	ENSG00000150054	membrane palmitoylated protein 7 [Source:HGNC Symbol;Acc:HGNC:26542]	chr10	28050993	28334486	-1	p12.1	MPP7	38.78	protein_coding	6371
0.0001871	0.00241	484.79	1104.95	622.5	428.24	722.42	212614_at	(1, 2), (3, 2), (4, 2), (4, 5)	ENSG00000150347	AT-rich interaction domain 5B [Source:HGNC Symbol;Acc:HGNC:17362]	chr10	61901684	62096944	1	q21.2	ARID5B	40.32	protein_coding	8760
0.0067704	0.0339	138.64	62.41	143.21	114.59	112.42	202730_s_at	(2, 1), (2, 3), (2, 4), (2, 5)	ENSG00000150593	programmed cell death 4 [Source:HGNC Symbol;Acc:HGNC:8763]	chr10	110871795	110900006	1	q25.2	PDCD4	34.69	protein_coding	4547
0.0009155	0.00805	51.19	54.92	47.13	138.33	32.22	209869_at	(5, 4)	ENSG00000150594	adrenoceptor alpha 2A [Source:HGNC Symbol;Acc:HGNC:281]	chr10	111077029	111080907	1	q25.2	ADRA2A	59.71	protein_coding	3879
0.0017106	0.0126	117.01	433.34	524.43	474.31	297.41	206385_s_at	(1, 2), (1, 3), (1, 4)	ENSG00000151150	ankyrin 3 [Source:HGNC Symbol;Acc:HGNC:494]	chr10	60026298	60733490	-1	q21.2	ANK3	37.75	protein_coding	25759
< 1e-07	< 1e-07	29.37	128.37	78.33	133.98	45.04	239196_at	(1, 2), (1, 3), (1, 4), (5, 2), (5, 3), (5, 4)	ENSG00000152766	ankyrin repeat domain 22 [Source:HGNC Symbol;Acc:HGNC:28321]	chr10	88819896	88851844	-1	q23.31	ANKRD22	37.87	protein_coding	3995
< 1e-07	< 1e-07	16.78	204.78	89.98	218.21	41.21	238439_at	(1, 2), (1, 3), (1, 4), (5, 2), (5, 4)	ENSG00000152766	ankyrin repeat domain 22 [Source:HGNC Symbol;Acc:HGNC:28321]	chr10	88819896	88851844	-1	q23.31	ANKRD22	37.87	protein_coding	3995
1.9e-05	0.000416	58.65	24.8	26.85	90.8	34.03	204689_at	(2, 4), (3, 4), (5, 4)	ENSG00000152804	hematopoietically expressed homeobox [Source:HGNC Symbol;Acc:HGNC:4901]	chr10	92689955	92695647	1	q23.33	HHEX	46.36	protein_coding	2522
0.0003332	0.00379	59.03	21.83	17.39	86.55	29.29	215933_s_at	(2, 4), (3, 4), (5, 4)	ENSG00000152804	hematopoietically expressed homeobox [Source:HGNC Symbol;Acc:HGNC:4901]	chr10	92689955	92695647	1	q23.33	HHEX	46.36	protein_coding	2522
0.0074822	0.0363	425.93	422.6	678.22	474.11	433.8	201458_s_at	(2, 3), (5, 3)	ENSG00000154473	BUB3 mitotic checkpoint protein [Source:HGNC Symbol;Acc:HGNC:1151]	chr10	123154402	123170467	1	q26.13	BUB3	39.16	protein_coding	8175
2.9e-06	9.61e-05	118.28	152.82	115.6	305.54	147	225320_at	(1, 4), (2, 4), (3, 4), (5, 4)	ENSG00000156026	mitochondrial calcium uniporter [Source:HGNC Symbol;Acc:HGNC:23526]	chr10	72692131	72887694	1	q22.1	MCU	38.8	protein_coding	4533
0.0045065	0.0255	19.83	167.84	35.21	85.42	56.91	227614_at	(1, 2), (3, 2), (5, 2)	ENSG00000156510	hexokinase domain containing 1 [Source:HGNC Symbol;Acc:HGNC:23302]	chr10	69220332	69267552	1	q22.1	HKDC1	47.95	protein_coding	4223
0.0016995	0.0125	436.22	1210.87	701.31	751.61	669.03	200697_at	(1, 2), (3, 2), (5, 2)	ENSG00000156515	hexokinase 1 [Source:HGNC Symbol;Acc:HGNC:4922]	chr10	69269984	69401884	1	q22.1	HK1	47.64	protein_coding	6293
0.0029614	0.0187	33.36	22.07	29.58	33.62	43.96	231035_s_at	(2, 5)	ENSG00000165312	OTU deubiquitinase 1 [Source:HGNC Symbol;Acc:HGNC:27346]	chr10	23439075	23442377	1	p12.2	OTUD1	53.28	protein_coding	3303
3.79e-05	0.000723	269.33	208.14	263.69	297.27	451.4	226140_s_at	(2, 5), (3, 5)	ENSG00000165312	OTU deubiquitinase 1 [Source:HGNC Symbol;Acc:HGNC:27346]	chr10	23439075	23442377	1	p12.2	OTUD1	53.28	protein_coding	3303
0.0013426	0.0105	169.55	137.61	162.76	221.48	126.37	207606_s_at	(5, 4)	ENSG00000165322	Rho GTPase activating protein 12 [Source:HGNC Symbol;Acc:HGNC:16348]	chr10	31805398	31928876	-1	p11.22	ARHGAP12	36.94	protein_coding	5944
0.003203	0.0199	343.31	240.99	247.88	342.02	216.75	225785_at	(5, 4)	ENSG00000165476	receptor accessory protein 3 [Source:HGNC Symbol;Acc:HGNC:23711]	chr10	63521401	63625128	1	q21.3	REEP3	38.33	protein_coding	5215
0.0005373	0.00541	503.24	332.12	537.66	253.49	447.18	218005_at	(4, 1), (4, 3), (4, 5)	ENSG00000165512	zinc finger protein 22 [Source:HGNC Symbol;Acc:HGNC:13012]	chr10	45000923	45005326	1	q11.21	ZNF22	40.76	protein_coding	2103
0.0013155	0.0104	155.66	91.93	150.65	69.71	124.34	218006_s_at	(4, 1), (4, 3), (4, 5)	ENSG00000165512	zinc finger protein 22 [Source:HGNC Symbol;Acc:HGNC:13012]	chr10	45000923	45005326	1	q11.21	ZNF22	40.76	protein_coding	2103
0.0057712	0.0303	34.89	41.86	58.6	49.88	28.97	235471_at	(5, 3)	ENSG00000165633	V-set and transmembrane domain containing 4 [Source:HGNC Symbol;Acc:HGNC:26470]	chr10	49014236	49115522	-1	q11.23	VSTM4	44.89	protein_coding	8655
0.0036937	0.0221	37.5	29.98	48.02	46.97	27.26	213381_at	(5, 3), (5, 4)	ENSG00000165633	V-set and transmembrane domain containing 4 [Source:HGNC Symbol;Acc:HGNC:26470]	chr10	49014236	49115522	-1	q11.23	VSTM4	44.89	protein_coding	8655
2e-07	1.08e-05	19.68	36.21	60.59	36.2	23.49	225830_at	(1, 3), (5, 3), (5, 4)	ENSG00000165650	PDZ domain containing 8 [Source:HGNC Symbol;Acc:HGNC:26974]	chr10	117277274	117375440	-1	q26.11	PDZD8	37.49	protein_coding	9854
2.9e-06	9.61e-05	116.76	151.49	369.42	232.76	116.84	230416_at	(1, 3), (2, 3), (5, 3), (5, 4)	ENSG00000165650	PDZ domain containing 8 [Source:HGNC Symbol;Acc:HGNC:26974]	chr10	117277274	117375440	-1	q26.11	PDZD8	37.49	protein_coding	9854
7.87e-05	0.00125	121.15	170.6	347.68	203.28	143.73	213549_at	(1, 3), (2, 3), (5, 3)	ENSG00000165650	PDZ domain containing 8 [Source:HGNC Symbol;Acc:HGNC:26974]	chr10	117277274	117375440	-1	q26.11	PDZD8	37.49	protein_coding	9854
2e-06	7.06e-05	41.96	68.83	113.06	66.89	47.21	225829_at	(1, 3), (5, 3)	ENSG00000165650	PDZ domain containing 8 [Source:HGNC Symbol;Acc:HGNC:26974]	chr10	117277274	117375440	-1	q26.11	PDZD8	37.49	protein_coding	9854
< 1e-07	< 1e-07	255.44	740	499.03	268.69	1222.32	227195_at	(1, 2), (1, 5), (4, 2), (3, 5), (4, 5)	ENSG00000165655	zinc finger protein 503 [Source:HGNC Symbol;Acc:HGNC:23589]	chr10	75397830	75401764	-1	q22.2	ZNF503	61.14	protein_coding	3205
6.11e-05	0.00104	14.11	18.57	15.81	15.78	24.67	228684_at	(1, 5), (3, 5), (4, 5)	ENSG00000165655	zinc finger protein 503 [Source:HGNC Symbol;Acc:HGNC:23589]	chr10	75397830	75401764	-1	q22.2	ZNF503	61.14	protein_coding	3205
0.0072033	0.0354	18.85	40.09	20.42	18.27	24.55	229378_at	(3, 2), (4, 2), (5, 2)	ENSG00000165730	storkhead box 1 [Source:HGNC Symbol;Acc:HGNC:23508]	chr10	68827531	68895432	1	q22.1	STOX1	45.18	protein_coding	3914
0.0036906	0.0221	206.1	188.61	214.14	328.3	180.06	207181_s_at	(5, 4)	ENSG00000165806	caspase 7 [Source:HGNC Symbol;Acc:HGNC:1508]	chr10	113679162	113730907	1	q25.3	CASP7	42.96	protein_coding	3612
0.0042074	0.0244	115.81	147.04	225.19	231.76	146.69	227701_at	(5, 3), (5, 4)	ENSG00000165813	coiled-coil domain containing 186 [Source:HGNC Symbol;Acc:HGNC:24349]	chr10	114120862	114174232	-1	q25.3	CCDC186	37.12	protein_coding	9003
0.0014479	0.0111	253.07	490	652.38	306.29	516.53	212322_at	(1, 3), (1, 5), (4, 3), (4, 5)	ENSG00000166224	sphingosine-1-phosphate lyase 1 [Source:HGNC Symbol;Acc:HGNC:10817]	chr10	70815948	70881184	1	q22.1	SGPL1	41.07	protein_coding	7510
0.0001324	0.00185	43.91	43.94	193.19	32.02	310.47	221950_at	(2, 5), (4, 5)	ENSG00000170370	empty spiracles homeobox 2 [Source:HGNC Symbol;Acc:HGNC:3341]	chr10	117542445	117549546	1	q26.11	EMX2	56.25	protein_coding	3261
0.0086294	0.0402	80.8	73.88	71.11	49.98	80.37	226313_at	(4, 5)	ENSG00000171224	family with sequence similarity 241 member B [Source:HGNC Symbol;Acc:HGNC:23519]	chr10	69630247	69633596	1	q22.1	FAM241B	56.18	protein_coding	1350
0.0084082	0.0395	50.51	31.45	45.11	43.98	67.24	209877_at	(2, 5)	ENSG00000173267	synuclein gamma [Source:HGNC Symbol;Acc:HGNC:11141]	chr10	86958599	86963258	1	q23.2	SNCG	61.44	protein_coding	1264
0.0029061	0.0185	356.94	289.98	624.02	888.39	500.52	201829_at	(2, 4), (5, 4)	ENSG00000173848	neuroepithelial cell transforming 1 [Source:HGNC Symbol;Acc:HGNC:14592]	chr10	5412557	5459056	1	p15.1	NET1	37	protein_coding	4762
0.0041201	0.024	411.14	194.13	576.03	710.85	436.34	201830_s_at	(2, 3), (2, 4), (2, 5)	ENSG00000173848	neuroepithelial cell transforming 1 [Source:HGNC Symbol;Acc:HGNC:14592]	chr10	5412557	5459056	1	p15.1	NET1	37	protein_coding	4762
0.0010365	0.00876	2882.79	1480.18	2705.68	1972.96	1709.69	210835_s_at	(2, 1), (2, 3), (5, 3)	ENSG00000175029	C-terminal binding protein 2 [Source:HGNC Symbol;Acc:HGNC:2495]	chr10	124984317	125161170	-1	q26.13	CTBP2	50.11	protein_coding	11056
0.0081221	0.0385	312.42	195.15	376.69	281.19	216.05	201219_at	(2, 3), (5, 3)	ENSG00000175029	C-terminal binding protein 2 [Source:HGNC Symbol;Acc:HGNC:2495]	chr10	124984317	125161170	-1	q26.13	CTBP2	50.11	protein_coding	11056
0.0007387	0.00685	2225.47	1238.55	2151.15	1635.81	1437.64	210554_s_at	(2, 1), (2, 3), (5, 3)	ENSG00000175029	C-terminal binding protein 2 [Source:HGNC Symbol;Acc:HGNC:2495]	chr10	124984317	125161170	-1	q26.13	CTBP2	50.11	protein_coding	11056
0.0009265	0.00812	1987.65	983.36	2103.94	1419.85	1248.43	201218_at	(2, 3), (5, 3)	ENSG00000175029	C-terminal binding protein 2 [Source:HGNC Symbol;Acc:HGNC:2495]	chr10	124984317	125161170	-1	q26.13	CTBP2	50.11	protein_coding	11056
0.0012835	0.0102	2852.7	1668.26	2947.73	2215.17	1875.74	201220_x_at	(2, 3), (5, 3)	ENSG00000175029	C-terminal binding protein 2 [Source:HGNC Symbol;Acc:HGNC:2495]	chr10	124984317	125161170	-1	q26.13	CTBP2	50.11	protein_coding	11056
0.0073308	0.0359	1201.54	1239.81	1049.46	347.91	770.85	201849_at	(4, 2), (4, 3), (4, 5)	ENSG00000176171	BCL2 interacting protein 3 [Source:HGNC Symbol;Acc:HGNC:1084]	chr10	131966455	131982013	-1	q26.3	BNIP3	49.42	protein_coding	5325
0.0030625	0.0192	367.01	414.28	297.33	105.02	239.56	201848_s_at	(4, 1), (4, 2), (4, 3), (4, 5)	ENSG00000176171	BCL2 interacting protein 3 [Source:HGNC Symbol;Acc:HGNC:1084]	chr10	131966455	131982013	-1	q26.3	BNIP3	49.42	protein_coding	5325
0.0076594	0.0369	19.25	18.05	51.94	11.45	26.82	228523_at	(4, 3), (4, 5)	ENSG00000188613	nanos C2HC-type zinc finger 1 [Source:HGNC Symbol;Acc:HGNC:23044]	chr10	119029714	119033730	1	q26.11	NANOS1	50.91	protein_coding	4017
0.0078894	0.0377	393.96	653.39	457.39	410.42	364.18	225049_at	(5, 2)	ENSG00000196072	biogenesis of lysosomal organelles complex 1 subunit 2 [Source:HGNC Symbol;Acc:HGNC:20984]	chr10	100273280	100286680	-1	q24.31	BLOC1S2	47.31	protein_coding	2911
0.0007019	0.00663	136.07	284.66	501.76	622.8	116.27	209160_at	(5, 3), (5, 4)	ENSG00000196139	aldo-keto reductase family 1 member C3 [Source:HGNC Symbol;Acc:HGNC:386]	chr10	5035354	5107686	1	p15.1	AKR1C3	40.4	protein_coding	3911
0.0071641	0.0353	77.97	37.54	70.61	48.5	41.2	226030_at	(5, 3)	ENSG00000196177	acyl-CoA dehydrogenase short/branched chain [Source:HGNC Symbol;Acc:HGNC:91]	chr10	123008979	123058290	1	q26.13	ACADSB	40.73	protein_coding	6234
0.0064988	0.0329	185.1	252.63	191.07	345.08	189.93	226520_at	(3, 4), (5, 4)	ENSG00000196233	ligand dependent nuclear receptor corepressor [Source:HGNC Symbol;Acc:HGNC:29503]	chr10	96832254	96995956	1	q24.1	LCOR	39.59	protein_coding	29854
0.0009477	0.00827	199.21	64.62	96.64	76.68	125.55	206261_at	(2, 1), (4, 1), (2, 5), (4, 5)	ENSG00000196793	zinc finger protein 239 [Source:HGNC Symbol;Acc:HGNC:13031]	chr10	43556344	43574618	-1	q11.21	ZNF239	42.81	protein_coding	2509
0.006655	0.0335	114.97	51.63	226.47	279.06	102.3	218322_s_at	(2, 3), (2, 4), (5, 4)	ENSG00000197142	acyl-CoA synthetase long chain family member 5 [Source:HGNC Symbol;Acc:HGNC:16526]	chr10	112374116	112428379	1	q25.2	ACSL5	42.88	protein_coding	4137
5.2e-06	0.000151	69.72	134.2	84.74	24.37	95.84	219277_s_at	(4, 2), (4, 3), (4, 5)	ENSG00000197444	oxoglutarate dehydrogenase L [Source:HGNC Symbol;Acc:HGNC:25590]	chr10	49734641	49762379	-1	q11.23	OGDHL	55.46	protein_coding	5726
0.0014165	0.011	65.14	47.15	38.54	24.95	112.21	211343_s_at	(4, 5)	ENSG00000197467	collagen type XIII alpha 1 chain [Source:HGNC Symbol;Acc:HGNC:2190]	chr10	69801880	69964275	1	q22.1	COL13A1	51.91	protein_coding	11509
9.6e-06	0.000246	42.42	94.03	47.27	48.45	38.78	220153_at	(1, 2), (3, 2), (4, 2), (5, 2)	ENSG00000198018	ectonucleoside triphosphate diphosphohydrolase 7 [Source:HGNC Symbol;Acc:HGNC:19745]	chr10	99659509	99711241	1	q24.2	ENTPD7	39.77	protein_coding	8655
0.0033956	0.0208	181.27	99.52	103.88	130.72	146.43	219344_at	(2, 5), (3, 5)	ENSG00000198246	solute carrier family 29 member 3 [Source:HGNC Symbol;Acc:HGNC:23096]	chr10	71319259	71381423	1	q22.1	SLC29A3	50.65	protein_coding	5438
0.0004403	0.00466	418.72	370.1	400.79	998.29	277.98	203060_s_at	(5, 4)	ENSG00000198682	3'-phosphoadenosine 5'-phosphosulfate synthase 2 [Source:HGNC Symbol;Acc:HGNC:8604]	chr10	87659613	87747705	1	q23.2	PAPSS2	40.41	protein_coding	4083
0.0004797	0.00495	207.12	144.46	168.47	443.04	120.5	203058_s_at	(2, 4), (5, 4)	ENSG00000198682	3'-phosphoadenosine 5'-phosphosulfate synthase 2 [Source:HGNC Symbol;Acc:HGNC:8604]	chr10	87659613	87747705	1	q23.2	PAPSS2	40.41	protein_coding	4083
5.44e-05	0.000948	80.5	67.15	63.13	126.45	57.34	203059_s_at	(2, 4), (3, 4), (5, 4)	ENSG00000198682	3'-phosphoadenosine 5'-phosphosulfate synthase 2 [Source:HGNC Symbol;Acc:HGNC:8604]	chr10	87659613	87747705	1	q23.2	PAPSS2	40.41	protein_coding	4083
0.0003751	0.00413	134.85	107.68	61.09	19.04	123.88	230563_at	(4, 2), (4, 5)	ENSG00000198915	RasGEF domain family member 1A [Source:HGNC Symbol;Acc:HGNC:24246]	chr10	43194535	43267065	-1	q11.21	RASGEF1A	56.42	protein_coding	6219
0.0045912	0.0258	22.7	34.13	22.32	19.09	51.16	236044_at	(4, 5)	ENSG00000203805	phospholipid phosphatase 4 [Source:HGNC Symbol;Acc:HGNC:23531]	chr10	120457227	120592065	1	q26.12	PLPP4	42.25	protein_coding	3722
0.0010605	0.00889	28.56	97.96	47.97	39.14	37.32	228372_at	(1, 2), (4, 2), (5, 2)	ENSG00000204161	transmembrane protein 273 [Source:HGNC Symbol;Acc:HGNC:27274]	chr10	49154725	49188585	-1	q11.23	TMEM273	47.39	protein_coding	4123
0.0021969	0.0151	106.08	83.73	151.45	85.1	296.24	232531_at	(2, 5), (4, 5)	ENSG00000229847	EMX2 opposite strand/antisense RNA [Source:HGNC Symbol;Acc:HGNC:18511]	chr10	117473215	117545068	-1	q26.11	EMX2OS	47.72	lncRNA	8918
3.4e-06	0.00011	28.08	31.2	33.35	27.14	44.87	228048_at	(1, 5), (2, 5), (3, 5), (4, 5)	ENSG00000237149	ZNF503 antisense RNA 2 [Source:HGNC Symbol;Acc:HGNC:23525]	chr10	75401519	75408982	1	q22.2	ZNF503-AS2	59.66	lncRNA	3348
0.0006491	0.00625	59.88	65.95	64.96	61.3	88.73	237044_s_at	(4, 5)	ENSG00000237149	ZNF503 antisense RNA 2 [Source:HGNC Symbol;Acc:HGNC:23525]	chr10	75401519	75408982	1	q22.2	ZNF503-AS2	59.66	lncRNA	3348
4.55e-05	0.000827	14.64	19.33	16.31	14.67	23.31	232178_at	(3, 5), (4, 5)	ENSG00000237149	ZNF503 antisense RNA 2 [Source:HGNC Symbol;Acc:HGNC:23525]	chr10	75401519	75408982	1	q22.2	ZNF503-AS2	59.66	lncRNA	3348
0.0069067	0.0343	23.17	12.26	13.86	18.77	27.56	239136_at	(2, 5), (3, 5)	ENSG00000237512	UNC5B antisense RNA 1 [Source:HGNC Symbol;Acc:HGNC:45096]	chr10	71217224	71218228	-1	q22.1	UNC5B-AS1	61.29	lncRNA	707
0.0005122	0.00522	36.57	17.73	36.27	21.7	41.32	232001_at	(2, 5), (4, 5)	ENSG00000237943	PRKCQ antisense RNA 1 [Source:HGNC Symbol;Acc:HGNC:44689]	chr10	6580419	6616921	1	p15.1	PRKCQ-AS1	40.55	lncRNA	5834
0.0044998	0.0255	40.28	61.62	23.92	19.08	24.5	239093_at	(3, 2), (4, 2), (5, 2)	ENSG00000241935	4-hydroxy-2-oxoglutarate aldolase 1 [Source:HGNC Symbol;Acc:HGNC:25155]	chr10	97584323	97612802	1	q24.2	HOGA1	48.67	protein_coding	4148
0.0029171	0.0185	47.29	41.61	62.38	53.56	77.7	214857_at	(2, 5)	ENSG00000269609	C10orf95 antisense RNA 1 [Source:HGNC Symbol;Acc:HGNC:45238]	chr10	102449816	102461106	1	q24.32	C10orf95-AS1	51.6	lncRNA	6160
< 1e-07	< 1e-07	52.93	84.57	33.83	107.79	23.22	205137_x_at	(3, 2), (5, 2), (3, 4), (5, 4)	ENSG00000006611	USH1 protein network component harmonin [Source:HGNC Symbol;Acc:HGNC:12597]	chr11	17493895	17544416	-1	p15.1	USH1C	51.78	protein_coding	4904
< 1e-07	< 1e-07	37.72	117.48	33.75	101.33	17.46	221173_at	(3, 2), (5, 2), (3, 4), (5, 4)	ENSG00000006611	USH1 protein network component harmonin [Source:HGNC Symbol;Acc:HGNC:12597]	chr11	17493895	17544416	-1	p15.1	USH1C	51.78	protein_coding	4904
6.5e-06	0.000178	42.3	28.15	33.38	89.43	43.1	229369_at	(1, 4), (2, 4), (3, 4), (5, 4)	ENSG00000019102	V-set and immunoglobulin domain containing 2 [Source:HGNC Symbol;Acc:HGNC:17149]	chr11	124747474	124752255	-1	q24.2	VSIG2	53.76	protein_coding	1447
5.48e-05	0.000954	56.28	23.09	28.28	146.17	41.68	228232_s_at	(2, 4), (3, 4), (5, 4)	ENSG00000019102	V-set and immunoglobulin domain containing 2 [Source:HGNC Symbol;Acc:HGNC:17149]	chr11	124747474	124752255	-1	q24.2	VSIG2	53.76	protein_coding	1447
0.0038445	0.0228	31.92	135.9	118.4	246.07	98.7	212014_x_at	(1, 4), (5, 4)	ENSG00000026508	CD44 molecule (Indian blood group) [Source:HGNC Symbol;Acc:HGNC:1681]	chr11	35138882	35232402	1	p13	CD44	41.56	protein_coding	9992
0.0001677	0.00222	17.57	93.97	123.09	171.57	63.59	217523_at	(1, 2), (1, 3), (1, 4), (1, 5), (5, 4)	ENSG00000026508	CD44 molecule (Indian blood group) [Source:HGNC Symbol;Acc:HGNC:1681]	chr11	35138882	35232402	1	p13	CD44	41.56	protein_coding	9992
0.0023502	0.0158	31.25	165.12	136.86	266.55	112.47	209835_x_at	(1, 2), (1, 3), (1, 4), (1, 5), (5, 4)	ENSG00000026508	CD44 molecule (Indian blood group) [Source:HGNC Symbol;Acc:HGNC:1681]	chr11	35138882	35232402	1	p13	CD44	41.56	protein_coding	9992
0.0063777	0.0325	14.82	33.25	26.31	36.32	22.37	229221_at	(1, 4), (5, 4)	ENSG00000026508	CD44 molecule (Indian blood group) [Source:HGNC Symbol;Acc:HGNC:1681]	chr11	35138882	35232402	1	p13	CD44	41.56	protein_coding	9992
0.0006594	0.00632	140	591.13	747.55	1123.92	466.99	212063_at	(1, 2), (1, 3), (1, 4), (1, 5), (5, 4)	ENSG00000026508	CD44 molecule (Indian blood group) [Source:HGNC Symbol;Acc:HGNC:1681]	chr11	35138882	35232402	1	p13	CD44	41.56	protein_coding	9992
0.00533	0.0287	29	114.26	107.57	181.02	84.07	204490_s_at	(1, 4), (5, 4)	ENSG00000026508	CD44 molecule (Indian blood group) [Source:HGNC Symbol;Acc:HGNC:1681]	chr11	35138882	35232402	1	p13	CD44	41.56	protein_coding	9992
0.0010444	0.0088	57.46	204.77	224.89	378.62	162.98	204489_s_at	(1, 3), (1, 4), (5, 4)	ENSG00000026508	CD44 molecule (Indian blood group) [Source:HGNC Symbol;Acc:HGNC:1681]	chr11	35138882	35232402	1	p13	CD44	41.56	protein_coding	9992
0.0020077	0.0142	311.71	111.65	125.08	105.9	124.15	212709_at	(2, 1), (3, 1), (4, 1), (5, 1)	ENSG00000030066	nucleoporin 160 [Source:HGNC Symbol;Acc:HGNC:18017]	chr11	47778087	47848555	-1	p11.2	NUP160	41.86	protein_coding	8576
< 1e-07	< 1e-07	405.18	95.29	142.17	145.31	348.61	203853_s_at	(2, 1), (2, 5), (3, 5), (4, 5)	ENSG00000033327	GRB2 associated binding protein 2 [Source:HGNC Symbol;Acc:HGNC:14458]	chr11	78215293	78418348	-1	q14.1	GAB2	41.71	protein_coding	6775
0.0018333	0.0132	74.23	86.98	58.59	50.68	82.94	231837_at	(4, 2), (4, 5)	ENSG00000048028	ubiquitin specific peptidase 28 [Source:HGNC Symbol;Acc:HGNC:12625]	chr11	113797874	113875570	-1	q23.2	USP28	41.45	protein_coding	5719
0.0004937	0.00506	77.38	78.5	54.02	45.66	82.54	1552678_a_at	(3, 5), (4, 5)	ENSG00000048028	ubiquitin specific peptidase 28 [Source:HGNC Symbol;Acc:HGNC:12625]	chr11	113797874	113875570	-1	q23.2	USP28	41.45	protein_coding	5719
4.4e-06	0.000132	76.12	130	176.54	227.34	91.41	204487_s_at	(1, 4), (5, 3), (5, 4)	ENSG00000053918	potassium voltage-gated channel subfamily Q member 1 [Source:HGNC Symbol;Acc:HGNC:6294]	chr11	2444684	2849105	1	p15.5	KCNQ1	51.55	protein_coding	4420
0.0078485	0.0375	485.06	193.21	248.5	249.91	327.81	229982_at	(2, 1), (2, 5)	ENSG00000060749	glutamine and serine rich 1 [Source:HGNC Symbol;Acc:HGNC:26154]	chr11	32892811	32993316	1	p13	QSER1	38.69	protein_coding	10908
0.0003357	0.00381	960.14	400.41	667.84	626.4	785.37	226265_at	(2, 1), (2, 5)	ENSG00000060749	glutamine and serine rich 1 [Source:HGNC Symbol;Acc:HGNC:26154]	chr11	32892811	32993316	1	p13	QSER1	38.69	protein_coding	10908
0.0016102	0.0121	10.85	36.77	126.83	37.7	127.67	205413_at	(1, 3), (1, 5)	ENSG00000066382	metallophosphoesterase domain containing 2 [Source:HGNC Symbol;Acc:HGNC:1180]	chr11	30384493	30586872	-1	p14.1	MPPED2	40.01	protein_coding	8114
5.15e-05	0.000911	189.84	113.99	146.26	119.02	227.17	242492_at	(2, 5), (4, 5)	ENSG00000074201	chloride nucleotide-sensitive channel 1A [Source:HGNC Symbol;Acc:HGNC:2080]	chr11	77514936	77637794	-1	q14.1	CLNS1A	41.76	protein_coding	4581
3.69e-05	0.000709	48.75	38.23	51.22	69.21	38.29	222469_s_at	(2, 4), (5, 4)	ENSG00000078902	toll interacting protein [Source:HGNC Symbol;Acc:HGNC:16476]	chr11	1274371	1309654	-1	p15.5	TOLLIP	57.49	protein_coding	5983
0.0046807	0.0262	60.27	41.39	367.74	98.97	59.02	228554_at	(2, 3), (5, 3)	ENSG00000082175	progesterone receptor [Source:HGNC Symbol;Acc:HGNC:8910]	chr11	101029624	101129813	-1	q22.1	PGR	37.72	protein_coding	14693
0.0001648	0.0022	34.6	54.61	52.59	82.53	78.47	228910_at	(1, 4), (1, 5), (3, 5)	ENSG00000085117	CD82 molecule [Source:HGNC Symbol;Acc:HGNC:6210]	chr11	44564427	44620358	1	p11.2	CD82	53.56	protein_coding	4039
0.0040444	0.0237	170.51	215.78	234.66	305.59	305.32	203904_x_at	(1, 5)	ENSG00000085117	CD82 molecule [Source:HGNC Symbol;Acc:HGNC:6210]	chr11	44564427	44620358	1	p11.2	CD82	53.56	protein_coding	4039
0.0086798	0.0403	97.39	69.76	102.67	104.47	115.45	214074_s_at	(2, 5)	ENSG00000085733	cortactin [Source:HGNC Symbol;Acc:HGNC:3338]	chr11	70398404	70436584	1	q13.3	CTTN	52.81	protein_coding	6949
0.0074562	0.0363	104.05	140.75	103.28	202.92	161.31	204927_at	(3, 4), (3, 5)	ENSG00000099849	Ras association domain family member 7 [Source:HGNC Symbol;Acc:HGNC:1166]	chr11	560404	564025	1	p15.5	RASSF7	69.11	protein_coding	2514
0.0008902	0.00788	145.4	386.44	118.9	72.66	284.08	209283_at	(4, 2), (4, 5)	ENSG00000109846	crystallin alpha B [Source:HGNC Symbol;Acc:HGNC:2389]	chr11	111908564	111923722	-1	q23.1	CRYAB	46.12	protein_coding	4388
0.0087778	0.0407	344.34	847.43	494.72	424.29	391.81	211423_s_at	(5, 2)	ENSG00000109929	sterol-C5-desaturase [Source:HGNC Symbol;Acc:HGNC:10547]	chr11	121292681	121313410	1	q23.3	SC5D	38.3	protein_coding	10054
0.0010883	0.00908	72.58	83.19	67.83	54.44	101.67	216250_s_at	(4, 5)	ENSG00000110031	leupaxin [Source:HGNC Symbol;Acc:HGNC:14061]	chr11	58526871	58578220	-1	q12.1	LPXN	38.55	protein_coding	2467
0.000643	0.00622	1079.02	621.42	789.89	1050.83	1100.44	211074_at	(2, 4), (2, 5), (3, 5)	ENSG00000110195	folate receptor alpha [Source:HGNC Symbol;Acc:HGNC:3791]	chr11	72189558	72196323	1	q13.4	FOLR1	50.62	protein_coding	1601
< 1e-07	< 1e-07	172.13	617.15	222.17	110.83	1571.55	204437_s_at	(1, 5), (3, 5), (4, 5)	ENSG00000110195	folate receptor alpha [Source:HGNC Symbol;Acc:HGNC:3791]	chr11	72189558	72196323	1	q13.4	FOLR1	50.62	protein_coding	1601
0.0027929	0.018	38.5	61.92	17.65	16.19	33.9	206371_at	(3, 2), (4, 2), (4, 5)	ENSG00000110203	folate receptor gamma [Source:HGNC Symbol;Acc:HGNC:3795]	chr11	72114869	72139892	1	q13.4	FOLR3	45.32	protein_coding	1396
0.0022699	0.0155	101.88	35.62	56.47	41.99	51.55	235295_at	(2, 1), (4, 1), (5, 1)	ENSG00000110218	pannexin 1 [Source:HGNC Symbol;Acc:HGNC:8599]	chr11	94128841	94181968	1	q21	PANX1	43.15	protein_coding	2852
0.0002122	0.00266	599.97	273.34	263.69	302.53	432.98	1558953_s_at	(2, 1), (3, 1), (2, 5), (3, 5)	ENSG00000110274	centrosomal protein 164 [Source:HGNC Symbol;Acc:HGNC:29182]	chr11	117314557	117413266	1	q23.3	CEP164	47.97	protein_coding	12896
7.4e-06	0.000198	63.65	33.11	36.53	40.79	53.97	204251_s_at	(2, 1), (3, 1), (2, 5), (3, 5)	ENSG00000110274	centrosomal protein 164 [Source:HGNC Symbol;Acc:HGNC:29182]	chr11	117314557	117413266	1	q23.3	CEP164	47.97	protein_coding	12896
0.0017548	0.0128	241.05	307.55	397.93	479.99	285.46	226106_at	(1, 4), (5, 4)	ENSG00000110315	ring finger protein 141 [Source:HGNC Symbol;Acc:HGNC:21159]	chr11	10511673	10541230	-1	p15.4	RNF141	36.1	protein_coding	7825
0.0055034	0.0293	24.02	17.29	44.69	70.15	29.24	235956_at	(2, 4), (5, 4)	ENSG00000110318	centrosomal protein 126 [Source:HGNC Symbol;Acc:HGNC:29264]	chr11	101915010	102001062	1	q22.1	CEP126	36.41	protein_coding	8200
0.0091303	0.0418	41.43	93.46	58.09	100.38	74.65	1554079_at	(1, 2), (1, 4)	ENSG00000110328	polypeptide N-acetylgalactosaminyltransferase 18 [Source:HGNC Symbol;Acc:HGNC:30488]	chr11	11270877	11622005	-1	p15.4	GALNT18	46.35	protein_coding	3626
0.0037949	0.0226	67.04	31.17	36.78	33.76	48.72	229010_at	(2, 1)	ENSG00000110395	Cbl proto-oncogene [Source:HGNC Symbol;Acc:HGNC:1541]	chr11	119206298	119313926	1	q23.3	CBL	42.19	protein_coding	11718
0.0004177	0.00448	265.34	119.62	148.72	134.54	193.13	225231_at	(2, 1), (4, 1), (2, 5), (4, 5)	ENSG00000110395	Cbl proto-oncogene [Source:HGNC Symbol;Acc:HGNC:1541]	chr11	119206298	119313926	1	q23.3	CBL	42.19	protein_coding	11718
0.002162	0.0149	293.45	158.73	157.45	165.64	214.43	225234_at	(2, 1), (3, 1), (4, 1)	ENSG00000110395	Cbl proto-oncogene [Source:HGNC Symbol;Acc:HGNC:1541]	chr11	119206298	119313926	1	q23.3	CBL	42.19	protein_coding	11718
0.0008713	0.00775	1107.07	852.84	799.13	1062.67	1245.82	226297_at	(2, 5), (3, 5)	ENSG00000110422	homeodomain interacting protein kinase 3 [Source:HGNC Symbol;Acc:HGNC:4915]	chr11	33256672	33357023	1	p13	HIPK3	38.83	protein_coding	8164
0.0071631	0.0353	42.41	31.34	54.54	60.94	59.34	238686_at	(2, 4), (2, 5)	ENSG00000110429	F-box protein 3 [Source:HGNC Symbol;Acc:HGNC:13582]	chr11	33740939	33774543	-1	p13	FBXO3	37.03	protein_coding	12446
0.000371	0.0041	90.6	91.85	74.93	77.88	147.42	219593_at	(3, 5), (4, 5)	ENSG00000110446	solute carrier family 15 member 3 [Source:HGNC Symbol;Acc:HGNC:18068]	chr11	60937060	60952653	-1	q12.2	SLC15A3	52.91	protein_coding	6949
3.36e-05	0.000662	66.58	91.07	157.52	351.43	167.12	204981_at	(1, 4), (1, 5), (2, 4), (3, 4), (5, 4)	ENSG00000110628	solute carrier family 22 member 18 [Source:HGNC Symbol;Acc:HGNC:10964]	chr11	2899721	2925246	1	p15.4	SLC22A18	61.48	protein_coding	5231
8e-07	3.37e-05	1174.55	2300.38	1746.26	970.55	2072.91	200675_at	(1, 2), (1, 5), (4, 2), (4, 3), (4, 5)	ENSG00000110651	CD81 molecule [Source:HGNC Symbol;Acc:HGNC:1701]	chr11	2376177	2397397	1	p15.5	CD81	63.43	protein_coding	7356
< 1e-07	< 1e-07	30.73	88.35	98.55	607.57	35.71	213432_at	(1, 4), (2, 4), (3, 4), (5, 4)	ENSG00000117983	mucin 5B, oligomeric mucus/gel-forming [Source:HGNC Symbol;Acc:HGNC:7516]	chr11	1223066	1262172	1	p15.5	MUC5B	65.56	protein_coding	18598
0.000319	0.00365	613.77	29.18	39.48	60.76	126.98	204450_x_at	(2, 1), (3, 1), (4, 1), (2, 5), (3, 5)	ENSG00000118137	apolipoprotein A1 [Source:HGNC Symbol;Acc:HGNC:600]	chr11	116835751	116837622	-1	q23.3	APOA1	62.61	protein_coding	1096
0.0002313	0.00285	611.29	34.07	34.67	63.42	130.96	217073_x_at	(2, 1), (3, 1), (4, 1), (2, 5), (3, 5)	ENSG00000118137	apolipoprotein A1 [Source:HGNC Symbol;Acc:HGNC:600]	chr11	116835751	116837622	-1	q23.3	APOA1	62.61	protein_coding	1096
0.0088234	0.0408	91.6	54.02	55.03	264.02	104.98	204073_s_at	(2, 4), (3, 4), (5, 4)	ENSG00000124920	myelin regulatory factor [Source:HGNC Symbol;Acc:HGNC:1181]	chr11	61752636	61788518	1	q12.2	MYRF	59.94	protein_coding	10773
0.0006742	0.00644	86.68	2922.57	3452.19	179.31	827.29	205979_at	(1, 2), (1, 3), (4, 2), (4, 3)	ENSG00000124939	secretoglobin family 2A member 1 [Source:HGNC Symbol;Acc:HGNC:7051]	chr11	62208673	62213943	1	q12.3	SCGB2A1	44.24	protein_coding	520
9e-05	0.00139	767.37	486.12	553.72	807.67	1005.82	211986_at	(2, 5), (3, 5)	ENSG00000124942	AHNAK nucleoprotein [Source:HGNC Symbol;Acc:HGNC:347]	chr11	62433542	62556235	-1	q12.3	AHNAK	50.05	protein_coding	19466
0.0040586	0.0238	488.32	630.62	748.79	740.45	875.44	222994_at	(1, 5)	ENSG00000126432	peroxiredoxin 5 [Source:HGNC Symbol;Acc:HGNC:9355]	chr11	64318121	64321811	1	q13.1	PRDX5	57.3	protein_coding	860
0.0006912	0.00656	779.02	1005.8	1263.23	1309.11	1497.86	1560587_s_at	(1, 5), (2, 5)	ENSG00000126432	peroxiredoxin 5 [Source:HGNC Symbol;Acc:HGNC:9355]	chr11	64318121	64321811	1	q13.1	PRDX5	57.3	protein_coding	860
< 1e-07	< 1e-07	86.78	38.4	37.49	46.13	157.66	206954_at	(2, 5), (3, 5), (4, 5)	ENSG00000183242	WT1 antisense RNA [Source:HGNC Symbol;Acc:HGNC:18135]	chr11	32435518	32458769	1	p13	WT1-AS	44.72	lncRNA	5561
0.0016162	0.0121	65.23	48.67	89.2	84.39	61.28	232983_s_at	(2, 3), (2, 4), (5, 3)	ENSG00000129158	secretion regulating guanine nucleotide exchange factor [Source:HGNC Symbol;Acc:HGNC:17499]	chr11	17788048	18013047	-1	p15.1	SERGEF	42.65	protein_coding	3387
0.004246	0.0245	37.02	37.93	86.94	58.21	43.71	1555269_a_at	(2, 3), (5, 3)	ENSG00000131620	anoctamin 1 [Source:HGNC Symbol;Acc:HGNC:21625]	chr11	70078302	70189528	1	q13.3	ANO1	54.71	protein_coding	6021
0.008655	0.0403	98.13	107.91	164.82	162.88	124.25	222481_at		ENSG00000132286	translocase of inner mitochondrial membrane 10B [Source:HGNC Symbol;Acc:HGNC:4022]	chr11	6481501	6484681	1	p15.4	TIMM10B	47.31	protein_coding	2989
0.0002929	0.00342	32.67	19.59	25.83	18.2	38.67	219786_at	(2, 5), (4, 5)	ENSG00000132749	testis expressed metallothionein like protein [Source:HGNC Symbol;Acc:HGNC:7446]	chr11	68707440	68751520	-1	q13.3	TESMIN	45.07	protein_coding	5789
0.0003829	0.00418	156.07	164.04	86.2	217.34	367.77	204070_at	(3, 5)	ENSG00000133321	phospholipase A and acyltransferase 4 [Source:HGNC Symbol;Acc:HGNC:9869]	chr11	63536808	63546462	1	q12.3	PLAAT4	48.53	protein_coding	1300
0.0018481	0.0133	56.35	52.09	40.99	45.99	29.7	219059_s_at	(5, 2)	ENSG00000133800	lymphatic vessel endothelial hyaluronan receptor 1 [Source:HGNC Symbol;Acc:HGNC:14687]	chr11	10556966	10611689	-1	p15.4	LYVE1	43.43	protein_coding	3515
0.0043461	0.025	22.23	18.58	17.58	16.7	12.32	220037_s_at		ENSG00000133800	lymphatic vessel endothelial hyaluronan receptor 1 [Source:HGNC Symbol;Acc:HGNC:14687]	chr11	10556966	10611689	-1	p15.4	LYVE1	43.43	protein_coding	3515
0.0002573	0.00311	65.44	36.54	185.25	75.46	38.51	212850_s_at	(2, 3), (5, 3)	ENSG00000134569	LDL receptor related protein 4 [Source:HGNC Symbol;Acc:HGNC:6696]	chr11	46856717	46918642	-1	p11.2	LRP4	48.69	protein_coding	8748
0.006822	0.0341	73.88	45.47	22.85	41.07	26.43	230480_at	(3, 1), (5, 1)	ENSG00000134627	piwi like RNA-mediated gene silencing 4 [Source:HGNC Symbol;Acc:HGNC:18444]	chr11	94543840	94621421	1	q21	PIWIL4	40.25	protein_coding	4498
1.59e-05	0.000365	238.81	415.89	105.11	124.86	241.92	213113_s_at	(3, 2), (4, 2), (3, 5), (4, 5)	ENSG00000134802	solute carrier family 43 member 3 [Source:HGNC Symbol;Acc:HGNC:17466]	chr11	57406954	57427580	-1	q12.1	SLC43A3	48.17	protein_coding	4517
0.0001603	0.00215	161.22	313.5	93.12	92.69	180.48	210692_s_at	(3, 2), (4, 2), (3, 5), (4, 5)	ENSG00000134802	solute carrier family 43 member 3 [Source:HGNC Symbol;Acc:HGNC:17466]	chr11	57406954	57427580	-1	q12.1	SLC43A3	48.17	protein_coding	4517
< 1e-07	< 1e-07	14.97	18.24	17.62	205.55	18.29	205513_at	(1, 4), (2, 4), (3, 4), (5, 4)	ENSG00000134827	transcobalamin 1 [Source:HGNC Symbol;Acc:HGNC:11652]	chr11	59852800	59866489	-1	q12.1	TCN1	39.57	protein_coding	1500
7.24e-05	0.00118	17.2	14.28	24.98	27.75	15.91	242196_at	(2, 3), (2, 4), (5, 3), (5, 4)	ENSG00000134909	Rho GTPase activating protein 32 [Source:HGNC Symbol;Acc:HGNC:17399]	chr11	128965060	129279324	-1	q24.3	ARHGAP32	36.86	protein_coding	12968
0.0004111	0.00442	26.02	20.63	39.57	40.37	23.48	229648_at	(2, 3), (2, 4), (5, 3), (5, 4)	ENSG00000134909	Rho GTPase activating protein 32 [Source:HGNC Symbol;Acc:HGNC:17399]	chr11	128965060	129279324	-1	q24.3	ARHGAP32	36.86	protein_coding	12968
0.0021758	0.015	40.67	37.56	54.44	72.61	40.6	210791_s_at	(2, 4), (5, 4)	ENSG00000134909	Rho GTPase activating protein 32 [Source:HGNC Symbol;Acc:HGNC:17399]	chr11	128965060	129279324	-1	q24.3	ARHGAP32	36.86	protein_coding	12968
0.0056258	0.0298	92.46	76.57	132.45	136.02	75.89	203431_s_at	(5, 3), (5, 4)	ENSG00000134909	Rho GTPase activating protein 32 [Source:HGNC Symbol;Acc:HGNC:17399]	chr11	128965060	129279324	-1	q24.3	ARHGAP32	36.86	protein_coding	12968
< 1e-07	< 1e-07	392.49	81.47	88.65	80.8	1450.61	206067_s_at	(2, 5), (3, 5), (4, 5)	ENSG00000184937	WT1 transcription factor [Source:HGNC Symbol;Acc:HGNC:12796]	chr11	32387775	32435564	-1	p13	WT1	46.42	protein_coding	8133
0.0003624	0.00402	39.47	28.59	25.63	58.76	32.22	222756_s_at	(2, 4), (3, 4), (5, 4)	ENSG00000137486	arrestin beta 1 [Source:HGNC Symbol;Acc:HGNC:711]	chr11	75260122	75351705	-1	q13.4	ARRB1	52.02	protein_coding	9888
0.0017934	0.013	26.51	21.31	20.59	51.35	27.55	222912_at	(2, 4), (3, 4), (5, 4)	ENSG00000137486	arrestin beta 1 [Source:HGNC Symbol;Acc:HGNC:711]	chr11	75260122	75351705	-1	q13.4	ARRB1	52.02	protein_coding	9888
0.0003231	0.00369	524.5	288.22	544.13	387.76	519	209323_at	(2, 3), (2, 5)	ENSG00000137492	THAP domain containing 12 [Source:HGNC Symbol;Acc:HGNC:9440]	chr11	76349898	76381132	-1	q13.5	THAP12	40.28	protein_coding	8802
0.0029074	0.0185	83.06	96.72	139.07	105	160.46	214251_s_at	(2, 5)	ENSG00000137497	nuclear mitotic apparatus protein 1 [Source:HGNC Symbol;Acc:HGNC:8059]	chr11	72002864	72080693	-1	q13.4	NUMA1	46.62	protein_coding	15224
0.0043589	0.025	78.75	58.69	97.46	72.21	106.41	214250_at	(2, 5)	ENSG00000137497	nuclear mitotic apparatus protein 1 [Source:HGNC Symbol;Acc:HGNC:8059]	chr11	72002864	72080693	-1	q13.4	NUMA1	46.62	protein_coding	15224
0.0001436	0.00196	415.62	381.76	546.5	432.06	606.69	200747_s_at	(2, 5), (4, 5)	ENSG00000137497	nuclear mitotic apparatus protein 1 [Source:HGNC Symbol;Acc:HGNC:8059]	chr11	72002864	72080693	-1	q13.4	NUMA1	46.62	protein_coding	15224
0.0027762	0.0179	125.6	63.76	71.74	354.19	112.99	232914_s_at	(2, 4), (3, 4), (5, 4)	ENSG00000137501	synaptotagmin like 2 [Source:HGNC Symbol;Acc:HGNC:15585]	chr11	85694224	85811159	-1	q14.1	SYTL2	40.22	protein_coding	11258
0.0007093	0.00668	114.74	70.27	59.67	328.76	103.76	225496_s_at	(2, 4), (3, 4), (5, 4)	ENSG00000137501	synaptotagmin like 2 [Source:HGNC Symbol;Acc:HGNC:15585]	chr11	85694224	85811159	-1	q14.1	SYTL2	40.22	protein_coding	11258
0.0012218	0.00985	401.08	672.42	638.54	354.62	517.81	201494_at	(4, 2), (4, 3), (4, 5)	ENSG00000137509	prolylcarboxypeptidase [Source:HGNC Symbol;Acc:HGNC:9344]	chr11	82822936	82970584	-1	q14.1	PRCP	39.33	protein_coding	23408
0.0039947	0.0235	575.09	308.63	374.33	261.81	453.99	219217_at	(4, 5)	ENSG00000137513	asparaginyl-tRNA synthetase 2, mitochondrial [Source:HGNC Symbol;Acc:HGNC:26274]	chr11	78435968	78574874	-1	q14.1	NARS2	38.77	protein_coding	3146
0.0004509	0.00474	45.43	74.48	106.37	75.44	141.57	230707_at	(1, 5), (4, 5)	ENSG00000137642	sortilin related receptor 1 [Source:HGNC Symbol;Acc:HGNC:11185]	chr11	121452314	121633763	1	q24.1	SORL1	43.54	protein_coding	19408
0.0002498	0.00304	200.23	609.56	1011.77	710.52	1149.6	212560_at	(1, 3), (1, 4), (1, 5)	ENSG00000137642	sortilin related receptor 1 [Source:HGNC Symbol;Acc:HGNC:11185]	chr11	121452314	121633763	1	q24.1	SORL1	43.54	protein_coding	19408
0.0005891	0.0058	310.58	769.76	1173.45	782.64	1357.48	203509_at	(1, 3), (1, 5)	ENSG00000137642	sortilin related receptor 1 [Source:HGNC Symbol;Acc:HGNC:11185]	chr11	121452314	121633763	1	q24.1	SORL1	43.54	protein_coding	19408
0.0077181	0.0371	711.21	348	404.3	360.89	489.11	223151_at	(2, 1), (4, 1)	ENSG00000137692	defective in cullin neddylation 1 domain containing 5 [Source:HGNC Symbol;Acc:HGNC:28409]	chr11	103050686	103092194	-1	q22.3	DCUN1D5	35.6	protein_coding	13069
0.0008206	0.00739	425	207.99	181.91	145.07	218.7	212398_at	(2, 1), (3, 1), (4, 1), (5, 1), (4, 5)	ENSG00000137710	radixin [Source:HGNC Symbol;Acc:HGNC:9944]	chr11	109864295	110296712	-1	q22.3	RDX	39.02	protein_coding	8518
0.0064564	0.0328	1084.83	549.04	514.75	409.1	573.6	212397_at	(3, 1), (4, 1), (5, 1)	ENSG00000137710	radixin [Source:HGNC Symbol;Acc:HGNC:9944]	chr11	109864295	110296712	-1	q22.3	RDX	39.02	protein_coding	8518
0.0069392	0.0344	75.57	41.93	43.51	28.05	46.3	204969_s_at	(4, 1), (4, 5)	ENSG00000137710	radixin [Source:HGNC Symbol;Acc:HGNC:9944]	chr11	109864295	110296712	-1	q22.3	RDX	39.02	protein_coding	8518
0.0007601	0.00699	76.69	35.47	34.26	41.82	32.54	239161_at	(2, 1), (3, 1), (5, 1)	ENSG00000137714	ferredoxin 1 [Source:HGNC Symbol;Acc:HGNC:3638]	chr11	110429948	110464884	1	q22.3	FDX1	39.76	protein_coding	3144
4.09e-05	0.000764	749.98	442.78	332.53	459.93	285.18	203647_s_at	(3, 1), (5, 1), (5, 4)	ENSG00000137714	ferredoxin 1 [Source:HGNC Symbol;Acc:HGNC:3638]	chr11	110429948	110464884	1	q22.3	FDX1	39.76	protein_coding	3144
6.5e-05	0.00109	387.47	250.96	223.87	333.49	191.07	203646_at	(5, 1), (5, 4)	ENSG00000137714	ferredoxin 1 [Source:HGNC Symbol;Acc:HGNC:3638]	chr11	110429948	110464884	1	q22.3	FDX1	39.76	protein_coding	3144
0.0055316	0.0294	103.2	141.01	81.62	145.74	192.16	209970_x_at	(3, 5)	ENSG00000137752	caspase 1 [Source:HGNC Symbol;Acc:HGNC:1499]	chr11	105025443	105035250	-1	q22.3	CASP1	36.98	protein_coding	3698
3.73e-05	0.000715	2522.48	4379.37	2915.54	2208.94	4190.91	212203_x_at	(4, 2), (4, 5)	ENSG00000142089	interferon induced transmembrane protein 3 [Source:HGNC Symbol;Acc:HGNC:5414]	chr11	319676	329475	-1	p15.5	IFITM3	52.94	protein_coding	2844
0.0004687	0.00487	75.19	24.14	30.17	30.8	45.77	215190_at	(2, 1), (3, 1), (4, 1), (2, 5)	ENSG00000149100	eukaryotic translation initiation factor 3 subunit M [Source:HGNC Symbol;Acc:HGNC:24460]	chr11	32583798	32606264	1	p13	EIF3M	37.78	protein_coding	7430
0.0031986	0.0199	58.63	17.78	24.03	24.83	32.63	239848_at	(2, 1), (3, 1), (2, 5)	ENSG00000149100	eukaryotic translation initiation factor 3 subunit M [Source:HGNC Symbol;Acc:HGNC:24460]	chr11	32583798	32606264	1	p13	EIF3M	37.78	protein_coding	7430
1.28e-05	0.000307	1023.26	486.01	592.25	699.84	934.16	202232_s_at	(2, 1), (2, 5), (3, 5)	ENSG00000149100	eukaryotic translation initiation factor 3 subunit M [Source:HGNC Symbol;Acc:HGNC:24460]	chr11	32583798	32606264	1	p13	EIF3M	37.78	protein_coding	7430
2.23e-05	0.000479	1800.26	855.94	1052.13	1273.63	1523.6	202231_at	(2, 1), (2, 5), (3, 5)	ENSG00000149100	eukaryotic translation initiation factor 3 subunit M [Source:HGNC Symbol;Acc:HGNC:24460]	chr11	32583798	32606264	1	p13	EIF3M	37.78	protein_coding	7430
< 1e-07	5.91e-06	741.38	757.68	296.59	228.16	877.58	200986_at	(4, 1), (3, 2), (4, 2), (3, 5), (4, 5)	ENSG00000149131	serpin family G member 1 [Source:HGNC Symbol;Acc:HGNC:1228]	chr11	57597387	57619171	1	q12.1	SERPING1	47.09	protein_coding	7231
< 1e-07	< 1e-07	102.41	168.88	66.7	132.44	46.21	204394_at	(3, 2), (5, 2), (3, 4), (5, 4)	ENSG00000149150	solute carrier family 43 member 1 [Source:HGNC Symbol;Acc:HGNC:9225]	chr11	57484534	57515780	-1	q12.1	SLC43A1	50.69	protein_coding	3526
0.0001436	0.00196	612.69	320.92	547.08	343.91	529.33	230326_s_at	(2, 1), (2, 3), (2, 5), (4, 3), (4, 5)	ENSG00000149196	heat shock protein nuclear import factor hikeshi [Source:HGNC Symbol;Acc:HGNC:26938]	chr11	86302211	86345943	1	q14.2	HIKESHI	37.86	protein_coding	3433
0.0014568	0.0112	99.28	50.56	84.94	51.26	83.84	219979_s_at	(2, 5), (4, 5)	ENSG00000149196	heat shock protein nuclear import factor hikeshi [Source:HGNC Symbol;Acc:HGNC:26938]	chr11	86302211	86345943	1	q14.2	HIKESHI	37.86	protein_coding	3433
3.97e-05	0.000747	112.9	57.81	134.63	73.59	63.15	226479_at	(2, 3), (4, 3), (5, 3)	ENSG00000165572	kelch repeat and BTB domain containing 6 [Source:HGNC Symbol;Acc:HGNC:25340]	chr13	41127569	41132802	-1	q14.11	KBTBD6	43.14	protein_coding	5234
0.0073632	0.036	145.44	92.21	314.96	157.91	166.82	225123_at	(2, 3), (5, 3)	ENSG00000149212	sestrin 3 [Source:HGNC Symbol;Acc:HGNC:23060]	chr11	95165513	95232541	-1	q21	SESN3	35.27	protein_coding	10578
0.0033676	0.0206	65.46	25.02	82.08	37.82	87.01	213273_at	(2, 5)	ENSG00000149256	teneurin transmembrane protein 4 [Source:HGNC Symbol;Acc:HGNC:29945]	chr11	78652829	79441030	-1	q14.1	TENM4	44.45	protein_coding	16414
1.7e-06	6.23e-05	66.35	61.96	64.49	307.84	99.63	226292_at	(1, 4), (2, 4), (3, 4), (5, 4)	ENSG00000149260	calpain 5 [Source:HGNC Symbol;Acc:HGNC:1482]	chr11	77066961	77126155	1	q13.5	CAPN5	55.95	protein_coding	6137
9.59e-05	0.00145	36.13	29.78	32.8	95.11	46.93	205166_at	(1, 4), (2, 4), (3, 4), (5, 4)	ENSG00000149260	calpain 5 [Source:HGNC Symbol;Acc:HGNC:1482]	chr11	77066961	77126155	1	q13.5	CAPN5	55.95	protein_coding	6137
0.000793	0.00721	102.66	29.64	69.58	110.32	52.86	230100_x_at	(2, 1), (2, 4), (5, 4)	ENSG00000149269	p21 (RAC1) activated kinase 1 [Source:HGNC Symbol;Acc:HGNC:8590]	chr11	77322017	77474635	-1	q14.1	PAK1	39.9	protein_coding	6021
0.0002258	0.0028	313.18	148.62	319.63	434.12	316.34	226507_at	(2, 3), (2, 4), (2, 5)	ENSG00000149269	p21 (RAC1) activated kinase 1 [Source:HGNC Symbol;Acc:HGNC:8590]	chr11	77322017	77474635	-1	q14.1	PAK1	39.9	protein_coding	6021
0.0072208	0.0355	88.9	48.59	63.26	34.24	61.94	238075_at	(4, 1), (4, 5)	ENSG00000149554	checkpoint kinase 1 [Source:HGNC Symbol;Acc:HGNC:1925]	chr11	125625163	125676255	1	q24.2	CHEK1	37.73	protein_coding	5600
0.0049188	0.0272	20.97	18.79	23.44	20.28	28.47	243531_at	(2, 5)	ENSG00000149716	LTO1 maturation factor of ABCE1 [Source:HGNC Symbol;Acc:HGNC:17589]	chr11	69653076	69675416	-1	q13.3	LTO1	53.52	protein_coding	7872
0.0013518	0.0106	24.09	19.76	21.44	21.09	32.64	1565677_at	(2, 5), (4, 5)	ENSG00000150687	serine protease 23 [Source:HGNC Symbol;Acc:HGNC:14370]	chr11	86791059	86952910	1	q14.2	PRSS23	42.16	protein_coding	11444
0.0020344	0.0143	1676.01	1236.57	1801.53	1306.66	1909.82	218101_s_at	(2, 5), (4, 5)	ENSG00000151366	NADH:ubiquinone oxidoreductase subunit C2 [Source:HGNC Symbol;Acc:HGNC:7706]	chr11	78068297	78079862	-1	q14.1	NDUFC2	44.35	protein_coding	2302
0.0047621	0.0265	98.35	62.03	103.86	132.17	126.43	204663_at	(2, 4), (2, 5)	ENSG00000151376	malic enzyme 3 [Source:HGNC Symbol;Acc:HGNC:6985]	chr11	86441108	86672636	-1	q14.2	ME3	42.88	protein_coding	3838
0.0024123	0.0162	272.23	131.99	247.61	212.75	235.77	223711_s_at	(2, 1), (2, 3), (2, 5)	ENSG00000151500	thymocyte nuclear protein 1 [Source:HGNC Symbol;Acc:HGNC:29560]	chr11	134248279	134253370	-1	q25	THYN1	43.95	protein_coding	2119
0.0065506	0.0331	336.3	160.15	311	263.12	281.67	218491_s_at	(2, 1), (2, 3), (2, 5)	ENSG00000151500	thymocyte nuclear protein 1 [Source:HGNC Symbol;Acc:HGNC:29560]	chr11	134248279	134253370	-1	q25	THYN1	43.95	protein_coding	2119
4.53e-05	0.000825	69.21	126.94	112.59	305.52	83.81	226226_at	(1, 4), (3, 4), (5, 4)	ENSG00000151715	transmembrane protein 45B [Source:HGNC Symbol;Acc:HGNC:25194]	chr11	129815848	129860003	1	q24.3	TMEM45B	44.32	protein_coding	2998
2.58e-05	0.000535	18.62	50.25	37.67	140.92	25.64	230323_s_at	(1, 4), (3, 4), (5, 4)	ENSG00000151715	transmembrane protein 45B [Source:HGNC Symbol;Acc:HGNC:25194]	chr11	129815848	129860003	1	q24.3	TMEM45B	44.32	protein_coding	2998
0.0088165	0.0408	127.79	99.95	176.58	155.49	164.45	226383_at	(2, 3), (2, 5)	ENSG00000152219	ADP ribosylation factor like GTPase 14 effector protein [Source:HGNC Symbol;Acc:HGNC:26798]	chr11	30323104	30338223	1	p14.1	ARL14EP	36.4	protein_coding	5408
0.0016445	0.0123	475.88	447.34	285.65	348.27	631.92	201649_at	(3, 5), (4, 5)	ENSG00000156587	ubiquitin conjugating enzyme E2 L6 [Source:HGNC Symbol;Acc:HGNC:12490]	chr11	57551656	57568284	-1	q12.1	UBE2L6	48.66	protein_coding	2062
< 1e-07	< 1e-07	133.85	136	223.46	813.58	117.04	213059_at	(1, 4), (2, 4), (3, 4), (5, 4)	ENSG00000157613	cAMP responsive element binding protein 3 like 1 [Source:HGNC Symbol;Acc:HGNC:18856]	chr11	46277662	46321409	1	p11.2	CREB3L1	52.83	protein_coding	4023
2e-07	1.08e-05	21.28	22.21	25.61	44.48	21.35	213498_at	(1, 4), (2, 4), (3, 4), (5, 4)	ENSG00000157613	cAMP responsive element binding protein 3 like 1 [Source:HGNC Symbol;Acc:HGNC:18856]	chr11	46277662	46321409	1	p11.2	CREB3L1	52.83	protein_coding	4023
0.0035541	0.0214	117.23	72.3	119.36	71.42	105.04	222806_s_at	(2, 3), (4, 3), (4, 5)	ENSG00000158636	EMSY transcriptional repressor, BRCA2 interacting [Source:HGNC Symbol;Acc:HGNC:18071]	chr11	76444923	76553025	1	q13.5	EMSY	37.68	protein_coding	11783
0.0030375	0.0191	144.99	118.37	175.53	112.49	168.03	222807_at	(4, 3), (4, 5)	ENSG00000158636	EMSY transcriptional repressor, BRCA2 interacting [Source:HGNC Symbol;Acc:HGNC:18071]	chr11	76444923	76553025	1	q13.5	EMSY	37.68	protein_coding	11783
0.0041639	0.0242	118.33	77.12	106.63	172.25	95.54	209468_at	(2, 4), (5, 4)	ENSG00000162337	LDL receptor related protein 5 [Source:HGNC Symbol;Acc:HGNC:6697]	chr11	68312591	68449275	1	q13.2	LRP5	54.62	protein_coding	6182
0.0041553	0.0242	32.27	11.83	14.99	14.2	15.73	231978_at	(2, 1), (3, 1), (4, 1), (5, 1)	ENSG00000162341	two pore segment channel 2 [Source:HGNC Symbol;Acc:HGNC:20820]	chr11	69048932	69136316	1	q13.3	TPCN2	56.48	protein_coding	7253
0.0097378	0.0438	26.95	50.45	34.77	26.49	34.98	229250_at	(4, 2)	ENSG00000162341	two pore segment channel 2 [Source:HGNC Symbol;Acc:HGNC:20820]	chr11	69048932	69136316	1	q13.3	TPCN2	56.48	protein_coding	7253
2.65e-05	0.000547	177.4	127.93	184.77	127.4	219.43	201598_s_at	(2, 5), (4, 5)	ENSG00000165458	inositol polyphosphate phosphatase like 1 [Source:HGNC Symbol;Acc:HGNC:6080]	chr11	72223701	72239147	1	q13.4	INPPL1	58.53	protein_coding	6574
0.0011943	0.00972	10.26	18.84	19.61	29.18	14.57	230047_at	(1, 4), (5, 4)	ENSG00000165895	Rho GTPase activating protein 42 [Source:HGNC Symbol;Acc:HGNC:26545]	chr11	100687288	100993941	1	q22.1	ARHGAP42	38.07	protein_coding	9313
0.0006647	0.00637	21.3	34.49	36.17	69.06	26.02	223595_at	(1, 4), (5, 4)	ENSG00000165895	Rho GTPase activating protein 42 [Source:HGNC Symbol;Acc:HGNC:26545]	chr11	100687288	100993941	1	q22.1	ARHGAP42	38.07	protein_coding	9313
0.0001541	0.00208	66.55	93.13	144.42	51.37	79.66	227829_at	(1, 3), (4, 3), (5, 3), (4, 5)	ENSG00000165905	LARGE xylosyl- and glucuronyltransferase 2 [Source:HGNC Symbol;Acc:HGNC:16522]	chr11	45921621	45929096	1	p11.2	LARGE2	61.4	protein_coding	3151
7.26e-05	0.00118	227.91	604.69	166.36	409.71	224.9	219806_s_at	(3, 2), (5, 2), (3, 4), (5, 4)	ENSG00000166002	single-pass membrane protein with coiled-coil domains 4 [Source:HGNC Symbol;Acc:HGNC:24810]	chr11	93478472	93543391	-1	q21	SMCO4	45.14	protein_coding	1106
8.13e-05	0.00128	47.19	205.07	32.16	22.19	77.68	229004_at	(3, 2), (4, 2), (4, 5)	ENSG00000166106	ADAM metallopeptidase with thrombospondin type 1 motif 15 [Source:HGNC Symbol;Acc:HGNC:16305]	chr11	130448645	130476645	1	q24.3	ADAMTS15	51.86	protein_coding	6006
2e-06	7.06e-05	124.21	55.75	82.26	98.21	117.03	226127_at	(2, 1), (2, 4), (2, 5), (3, 5)	ENSG00000166199	alkB homolog 3, alpha-ketoglutarate dependent dioxygenase [Source:HGNC Symbol;Acc:HGNC:30141]	chr11	43880811	43920274	1	p11.2	ALKBH3	40.8	protein_coding	2380
0.0092544	0.0422	137.24	75.54	95.04	78.21	103.35	204327_s_at	(2, 1), (4, 1)	ENSG00000166261	zinc finger protein 202 [Source:HGNC Symbol;Acc:HGNC:12994]	chr11	123723914	123741675	-1	q24.1	ZNF202	44.44	protein_coding	5071
9.91e-05	0.00148	59.86	176.14	115.13	259.25	152.23	212841_s_at	(1, 2), (1, 4), (1, 5), (3, 4), (5, 4)	ENSG00000166387	PPFIA binding protein 2 [Source:HGNC Symbol;Acc:HGNC:9250]	chr11	7513298	7657127	1	p15.4	PPFIBP2	45.46	protein_coding	9800
0.0037726	0.0225	260.14	201.99	248.94	328.31	338.24	202440_s_at	(2, 5)	ENSG00000166444	DENN domain containing 2B [Source:HGNC Symbol;Acc:HGNC:11350]	chr11	8693351	8910951	-1	p15.4	DENND2B	45.03	protein_coding	14262
0.006228	0.032	259.29	309.08	290.95	356.99	229.13	212623_at	(5, 4)	ENSG00000166471	transmembrane protein 41B [Source:HGNC Symbol;Acc:HGNC:28948]	chr11	9280654	9314636	-1	p15.4	TMEM41B	42.34	protein_coding	4278
0.001103	0.00914	393.42	405.07	406.28	509.01	319.95	212622_at	(5, 4)	ENSG00000166471	transmembrane protein 41B [Source:HGNC Symbol;Acc:HGNC:28948]	chr11	9280654	9314636	-1	p15.4	TMEM41B	42.34	protein_coding	4278
0.0018404	0.0133	44.38	53.46	52.42	110.91	54.53	228450_at	(1, 4), (2, 4), (3, 4), (5, 4)	ENSG00000166689	pleckstrin homology domain containing A7 [Source:HGNC Symbol;Acc:HGNC:27049]	chr11	16777297	17014414	-1	p15.1	PLEKHA7	46.37	protein_coding	10978
0.0043444	0.025	13.19	14.75	13.67	13.55	35.22	217002_s_at		ENSG00000166736	5-hydroxytryptamine receptor 3A [Source:HGNC Symbol;Acc:HGNC:5297]	chr11	113975075	113990313	1	q23.2	HTR3A	50.57	protein_coding	2578
0.0031823	0.0198	23.41	35.92	27.73	23.52	85.21	216615_s_at	(4, 5)	ENSG00000166736	5-hydroxytryptamine receptor 3A [Source:HGNC Symbol;Acc:HGNC:5297]	chr11	113975075	113990313	1	q23.2	HTR3A	50.57	protein_coding	2578
3.64e-05	0.000701	578.88	527.22	84.07	137.16	668.46	202237_at	(3, 2), (3, 5), (4, 5)	ENSG00000166741	nicotinamide N-methyltransferase [Source:HGNC Symbol;Acc:HGNC:7861]	chr11	114257787	114313536	1	q23.2	NNMT	43.32	protein_coding	2596
6.88e-05	0.00114	330.91	263.93	56.01	96.35	392.64	202238_s_at	(3, 5), (4, 5)	ENSG00000166741	nicotinamide N-methyltransferase [Source:HGNC Symbol;Acc:HGNC:7861]	chr11	114257787	114313536	1	q23.2	NNMT	43.32	protein_coding	2596
0.0001424	0.00196	107.72	94.48	446.38	172.74	231.64	218330_s_at	(1, 3), (2, 3), (2, 5), (4, 3), (5, 3)	ENSG00000166833	neuron navigator 2 [Source:HGNC Symbol;Acc:HGNC:15997]	chr11	19350724	20121601	1	p15.1	NAV2	44.51	protein_coding	15174
0.0064395	0.0327	25.86	69.04	38.73	43.39	32.2	216985_s_at	(1, 2), (5, 2)	ENSG00000166900	syntaxin 3 [Source:HGNC Symbol;Acc:HGNC:11438]	chr11	59713456	59805882	1	q12.1	STX3	43.39	protein_coding	7308
2.16e-05	0.000464	199.46	527.82	357.55	394.68	258.06	209238_at	(1, 2), (5, 2), (5, 4)	ENSG00000166900	syntaxin 3 [Source:HGNC Symbol;Acc:HGNC:11438]	chr11	59713456	59805882	1	q12.1	STX3	43.39	protein_coding	7308
< 1e-07	< 1e-07	30.16	22.89	51.22	208.7	28.44	224355_s_at	(1, 4), (2, 4), (3, 4), (5, 4)	ENSG00000166959	membrane spanning 4-domains A8 [Source:HGNC Symbol;Acc:HGNC:13380]	chr11	60699585	60715807	1	q12.2	MS4A8	45.71	protein_coding	2568
1.05e-05	0.000264	42.17	76.68	41.77	71.36	47.83	202764_at	(1, 2), (1, 4), (3, 2), (5, 2), (3, 4), (5, 4)	ENSG00000167323	stromal interaction molecule 1 [Source:HGNC Symbol;Acc:HGNC:11386]	chr11	3854527	4093210	1	p15.4	STIM1	42.52	protein_coding	7168
9.9e-06	0.000251	76.1	119.06	184.92	135.86	85.44	219405_at	(1, 3), (5, 3), (5, 4)	ENSG00000167333	tripartite motif containing 68 [Source:HGNC Symbol;Acc:HGNC:21161]	chr11	4598672	4608231	-1	p15.4	TRIM68	46.45	protein_coding	4254
0.0003785	0.00415	935.02	760.47	840.31	765.72	1151.86	208714_at	(2, 5), (4, 5)	ENSG00000167792	NADH:ubiquinone oxidoreductase core subunit V1 [Source:HGNC Symbol;Acc:HGNC:7716]	chr11	67605653	67612554	1	q13.2	NDUFV1	56.2	protein_coding	5057
0.0043341	0.0249	5086.2	7859.57	8325.34	7647.97	9922.81	200748_s_at	(1, 5)	ENSG00000167996	ferritin heavy chain 1 [Source:HGNC Symbol;Acc:HGNC:3976]	chr11	61959718	61967634	-1	q12.3	FTH1	50.4	protein_coding	2004
0.0044004	0.0252	189.14	285.53	283.96	187.31	284.12	200924_s_at	(4, 5)	ENSG00000168003	solute carrier family 3 member 2 [Source:HGNC Symbol;Acc:HGNC:11026]	chr11	62856004	62888880	1	q12.3	SLC3A2	48.31	protein_coding	6392
0.0058874	0.0307	120.01	107.95	149.5	115.19	159.82	36552_at	(2, 5), (4, 5)	ENSG00000168014	C2 domain containing 3 centriole elongation regulator [Source:HGNC Symbol;Acc:HGNC:24564]	chr11	74012718	74171210	-1	q13.4	C2CD3	40.35	protein_coding	27209
9.45e-05	0.00144	300.47	216.64	378.77	224.72	436.28	219922_s_at	(2, 5), (4, 5)	ENSG00000168056	latent transforming growth factor beta binding protein 3 [Source:HGNC Symbol;Acc:HGNC:6716]	chr11	65538559	65558930	-1	q13.1	LTBP3	60.23	protein_coding	10675
0.0017516	0.0128	141.72	218.83	169.29	164.55	124.18	223701_s_at	(5, 2)	ENSG00000170242	ubiquitin specific peptidase 47 [Source:HGNC Symbol;Acc:HGNC:20076]	chr11	11841423	11961887	1	p15.3	USP47	35.56	protein_coding	13722
0.0010185	0.00868	103.39	104.04	138.74	117.26	81.75	223118_s_at	(5, 3)	ENSG00000170242	ubiquitin specific peptidase 47 [Source:HGNC Symbol;Acc:HGNC:20076]	chr11	11841423	11961887	1	p15.3	USP47	35.56	protein_coding	13722
6.2e-05	0.00105	147.37	242.73	195.35	208.85	143.67	223117_s_at	(5, 2), (5, 4)	ENSG00000170242	ubiquitin specific peptidase 47 [Source:HGNC Symbol;Acc:HGNC:20076]	chr11	11841423	11961887	1	p15.3	USP47	35.56	protein_coding	13722
0.0012172	0.00982	109.37	74.91	94.68	105.92	63.51	223119_s_at	(5, 4)	ENSG00000170242	ubiquitin specific peptidase 47 [Source:HGNC Symbol;Acc:HGNC:20076]	chr11	11841423	11961887	1	p15.3	USP47	35.56	protein_coding	13722
0.0007369	0.00685	484.28	654.43	530.72	582.43	422.36	221518_s_at	(5, 2), (5, 4)	ENSG00000170242	ubiquitin specific peptidase 47 [Source:HGNC Symbol;Acc:HGNC:20076]	chr11	11841423	11961887	1	p15.3	USP47	35.56	protein_coding	13722
0.0026613	0.0173	32.15	27.5	28.58	27.19	42.62	205824_at	(4, 5)	ENSG00000170276	heat shock protein family B (small) member 2 [Source:HGNC Symbol;Acc:HGNC:5247]	chr11	111912734	111914093	1	q23.1	HSPB2	61.03	protein_coding	843
0.0033326	0.0205	44.33	97.24	52.23	44.09	61.41	208373_s_at	(1, 2), (3, 2), (4, 2), (5, 2)	ENSG00000171631	pyrimidinergic receptor P2Y6 [Source:HGNC Symbol;Acc:HGNC:8543]	chr11	73264498	73305103	1	q13.4	P2RY6	51.57	protein_coding	10778
0.0042263	0.0245	136.17	106.36	128.33	127.67	169.21	204828_at	(2, 5)	ENSG00000172613	RAD9 checkpoint clamp component A [Source:HGNC Symbol;Acc:HGNC:9827]	chr11	67317871	67398410	1	q13.2	RAD9A	52.03	protein_coding	4169
0.0003858	0.00421	112.26	180.7	110.08	119.09	68.17	229396_at	(5, 2)	ENSG00000172818	ovo like transcriptional repressor 1 [Source:HGNC Symbol;Acc:HGNC:8525]	chr11	65787063	65797214	1	q13.1	OVOL1	60.15	protein_coding	3803
7.84e-05	0.00125	24.22	33.57	73.4	99.11	31.14	227342_s_at	(1, 4), (2, 4), (5, 3), (5, 4)	ENSG00000172927	myeloma overexpressed [Source:HGNC Symbol;Acc:HGNC:7563]	chr11	69294151	69367726	1	q13.3	MYEOV	49.12	protein_coding	3747
0.0007563	0.00696	137.49	153.75	124.81	121.61	180.96	208989_s_at	(3, 5), (4, 5)	ENSG00000173120	lysine demethylase 2A [Source:HGNC Symbol;Acc:HGNC:13606]	chr11	67119263	67258082	1	q13.2	KDM2A	42.99	protein_coding	10381
0.0059078	0.0308	27.29	25.53	22.88	44.48	38.1	228072_at	(3, 4), (3, 5)	ENSG00000173227	synaptotagmin 12 [Source:HGNC Symbol;Acc:HGNC:18381]	chr11	67006778	67050863	1	q13.2	SYT12	53.68	protein_coding	11041
0.0009067	0.00799	381.74	358.59	352.74	275.49	448.18	212680_x_at	(4, 5)	ENSG00000173457	protein phosphatase 1 regulatory inhibitor subunit 14B [Source:HGNC Symbol;Acc:HGNC:9057]	chr11	64244479	64246943	-1	q13.1	PPP1R14B	65.52	protein_coding	1658
0.0023057	0.0156	128.52	163.69	135.59	135.49	188.91	203114_at	(3, 5), (4, 5)	ENSG00000173465	zinc ribbon domain containing 2 [Source:HGNC Symbol;Acc:HGNC:11328]	chr11	65570460	65573942	1	q13.1	ZNRD2	61.24	protein_coding	1978
0.0017788	0.0129	79.76	104.39	107.86	77.97	122.87	203683_s_at	(4, 5)	ENSG00000173511	vascular endothelial growth factor B [Source:HGNC Symbol;Acc:HGNC:12681]	chr11	64234584	64239264	1	q13.1	VEGFB	60.01	protein_coding	1970
0.0024894	0.0165	41.96	85.97	40.46	64.34	49.99	204476_s_at	(1, 2), (3, 2), (5, 2)	ENSG00000173599	pyruvate carboxylase [Source:HGNC Symbol;Acc:HGNC:8636]	chr11	66848417	66958386	-1	q13.2	PC	51.93	protein_coding	7302
0.0090799	0.0416	82.82	74.26	83.57	69	99.05	219491_at	(4, 5)	ENSG00000173621	leucine rich repeat and fibronectin type III domain containing 4 [Source:HGNC Symbol;Acc:HGNC:28456]	chr11	66856647	66860475	1	q13.2	LRFN4	70.38	protein_coding	3087
0.0052547	0.0284	292.66	215.15	219.65	172.08	315.03	203657_s_at	(4, 5)	ENSG00000174080	cathepsin F [Source:HGNC Symbol;Acc:HGNC:2531]	chr11	66563464	66568879	-1	q13.2	CTSF	58.71	protein_coding	4249
0.0001468	0.002	217.05	143.3	243.21	240.8	149.24	203188_at	(2, 3), (5, 3), (5, 4)	ENSG00000174684	beta-1,4-glucuronyltransferase 1 [Source:HGNC Symbol;Acc:HGNC:15685]	chr11	66345374	66347629	-1	q13.2	B4GAT1	56.78	protein_coding	2007
0.0021312	0.0148	24.95	16.9	19.24	17.58	25.6	224337_s_at	(2, 5), (4, 5)	ENSG00000174804	frizzled class receptor 4 [Source:HGNC Symbol;Acc:HGNC:4042]	chr11	86945679	86955395	-1	q14.2	FZD4	45.44	protein_coding	7387
< 1e-07	< 1e-07	114.01	23.35	27.78	28.07	356.42	216953_s_at	(2, 5), (3, 5), (4, 5)	ENSG00000184937	WT1 transcription factor [Source:HGNC Symbol;Acc:HGNC:12796]	chr11	32387775	32435564	-1	p13	WT1	46.42	protein_coding	8133
0.0037793	0.0225	446.14	225.4	299.66	199.04	265.86	1555278_a_at	(2, 1), (4, 1), (5, 1)	ENSG00000175216	cytoskeleton associated protein 5 [Source:HGNC Symbol;Acc:HGNC:28959]	chr11	46743048	46846308	-1	p11.2	CKAP5	40.42	protein_coding	8538
0.0007021	0.00663	1420.59	1105.49	1130.47	905.61	1398.41	210125_s_at	(4, 5)	ENSG00000175334	BAF nuclear assembly factor 1 [Source:HGNC Symbol;Acc:HGNC:17397]	chr11	66002228	66004149	1	q13.1	BANF1	57.86	protein_coding	1496
0.0016612	0.0123	14.58	13.05	27.17	19.31	14.69	230479_at	(2, 3), (5, 3)	ENSG00000175390	eukaryotic translation initiation factor 3 subunit F [Source:HGNC Symbol;Acc:HGNC:3275]	chr11	7970251	8001862	1	p15.4	EIF3F	41.38	protein_coding	15136
0.0059744	0.0311	34.82	39.06	38.27	38.62	52.31	228258_at		ENSG00000175463	TBC1 domain family member 10C [Source:HGNC Symbol;Acc:HGNC:24702]	chr11	67403915	67410089	1	q13.2	TBC1D10C	61.91	protein_coding	5033
0.000382	0.00417	193.06	159.16	200.47	376.22	240.69	202996_at	(1, 4), (2, 4), (2, 5), (3, 4), (5, 4)	ENSG00000175482	DNA polymerase delta 4, accessory subunit [Source:HGNC Symbol;Acc:HGNC:14106]	chr11	67350772	67356972	-1	q13.2	POLD4	58.04	protein_coding	3054
0.0003301	0.00376	90.76	122.75	73.8	81.25	121.31	219500_at	(3, 2), (3, 5), (4, 5)	ENSG00000175505	cardiotrophin like cytokine factor 1 [Source:HGNC Symbol;Acc:HGNC:17412]	chr11	67364168	67374177	-1	q13.2	CLCF1	60.06	protein_coding	1836
0.0021146	0.0147	31.3	41.54	21.45	84.2	29.09	222922_at	(3, 4), (5, 4)	ENSG00000175538	potassium voltage-gated channel subfamily E regulatory subunit 3 [Source:HGNC Symbol;Acc:HGNC:6243]	chr11	74454841	74467729	-1	q13.4	KCNE3	48.41	protein_coding	3599
0.0067543	0.0339	36.04	40.1	29.84	80.22	35.72	222923_s_at	(3, 4), (5, 4)	ENSG00000175538	potassium voltage-gated channel subfamily E regulatory subunit 3 [Source:HGNC Symbol;Acc:HGNC:6243]	chr11	74454841	74467729	-1	q13.4	KCNE3	48.41	protein_coding	3599
0.0001003	0.00149	150.4	377.56	211.25	238.75	513.34	208997_s_at	(1, 5), (3, 5), (4, 5)	ENSG00000175567	uncoupling protein 2 [Source:HGNC Symbol;Acc:HGNC:12518]	chr11	73974672	73982843	-1	q13.4	UCP2	52.37	protein_coding	2768
4.66e-05	0.000844	512.83	2230.66	945.56	1105.95	2523.82	208998_at	(1, 2), (1, 5), (3, 5), (4, 5)	ENSG00000175567	uncoupling protein 2 [Source:HGNC Symbol;Acc:HGNC:12518]	chr11	73974672	73982843	-1	q13.4	UCP2	52.37	protein_coding	2768
0.0001749	0.0023	17.51	14.95	35.52	18.81	13.66	206382_s_at	(2, 3), (5, 3)	ENSG00000176697	brain derived neurotrophic factor [Source:HGNC Symbol;Acc:HGNC:1033]	chr11	27654893	27722058	-1	p14.1	BDNF	40.25	protein_coding	7740
0.0089676	0.0412	1045.11	1883.26	1434.14	1722.35	1246.86	201463_s_at	(5, 2)	ENSG00000177156	transaldolase 1 [Source:HGNC Symbol;Acc:HGNC:11559]	chr11	747415	765012	1	p15.5	TALDO1	51.9	protein_coding	2907
0.0069367	0.0344	63.15	39.67	58.67	76.48	40.75	229526_at	(5, 4)	ENSG00000178301	aquaporin 11 [Source:HGNC Symbol;Acc:HGNC:19940]	chr11	77589391	77610356	1	q14.1	AQP11	42.04	protein_coding	2125
0.0001871	0.00241	190.37	109.27	108.23	162.93	221.69	219522_at	(2, 5), (3, 5)	ENSG00000179431	four-jointed box kinase 1 [Source:HGNC Symbol;Acc:HGNC:17166]	chr11	35618460	35620865	1	p13	FJX1	63.97	protein_coding	2406
5.13e-05	0.000908	60.55	93.01	72.53	48.94	37.25	234978_at	(5, 2), (5, 3)	ENSG00000180773	solute carrier family 36 member 4 [Source:HGNC Symbol;Acc:HGNC:19660]	chr11	93144174	93197991	-1	q21	SLC36A4	35.1	protein_coding	9709
0.0004512	0.00474	57.76	38.07	39.28	32.98	55.03	1554076_s_at	(4, 5)	ENSG00000181264	TLC domain containing 5 [Source:HGNC Symbol;Acc:HGNC:28280]	chr11	120325296	120333686	1	q23.3	TLCD5	42.86	protein_coding	4305
[truncated: 3,498 more rows]

## Sheet: GSE63885
Parametric p-value	FDR	Clear cell (1)	Endometrioid (2)	Serous (3)	Undetermined (4)	ProbeSet	Pairwise significant	Gene_ID	Gene_description	Chromosome_scaffold_name	Gene_start_bp	Gene_end_bp	Strand	Karyotype_band	Gene_name	Gene_GC_content	Gene_type	Gene_Length
[truncated: 3,850 more rows]

[truncated: 8 more sheets: GSE6008, GSE121103 CCOC, GSE121103 ENOC, GSE121103 HGSOC, GSE121103 MOC, GSE18995 CCOC, GSE18995 ENOC, GSE18995 HGSOC]
