# Supplementary material for: Identification of lncRNAs Deregulated in Epithelial Ovarian Cancer Based on a Gene Expression Profiling Meta-Analysis
Source: Int J Mol Sci. 2023 Jun 28;24(13):10798. doi: 10.3390/ijms241310798 (PMC10341812; doi:10.3390/ijms241310798)
Supplement: Supplementary file 1 [file ijms-24-10798-s001.zip › Supplementary Table S12.xlsx]

## Sheet: STS12 Title
	Supplementary Table S12.- LncRNAs that are deregulated in serous, clear cell, mucinous, or endometrioid EOC in com-parison with the other subtypes, including information regarding previous references related with EOC.

## Sheet: Serous
Status	Gene_ID	Gene_name	Previous references in EOC	# of studies	Gene_description	Chromosome_scaffold_name	Gene_start_bp	Gene_end_bp	Strand	Karyotype_band	Gene_GC_content	Gene_type	Gene_Length
Up	ENSG00000234327	ZNF232-AS1	-	1	ZNF232 antisense RNA 1 [Source:HGNC Symbol;Acc:HGNC:40623]	chr17	5111468	5115004	1	p13.2	48.26	lncRNA	2006
Up	ENSG00000232677	LINC00665	[39]	1	long intergenic non-protein coding RNA 665 [Source:HGNC Symbol;Acc:HGNC:44323]	chr19	36259540	36331770	-1	q13.12	57.55	lncRNA	12167
Up	ENSG00000267014	LINC01532	-	1	long intergenic non-protein coding RNA 1532 [Source:HGNC Symbol;Acc:HGNC:51272]	chr19	29002319	29015160	1	q12	49.1	lncRNA	4426
Up	ENSG00000240498	CDKN2B-AS1	[155]	1	CDKN2B antisense RNA 1 [Source:HGNC Symbol;Acc:HGNC:34341]	chr9	21994139	22128103	1	p21.3	38.84	lncRNA	20420
Up	ENSG00000238113	LINC01410	-	1	long intergenic non-protein coding RNA 1410 [Source:HGNC Symbol;Acc:HGNC:50702]	chr9	62801461	62813486	1	q13	40.99	lncRNA	4123
Up	ENSG00000237310	GS1-124K5.4	-	1	uncharacterized LOC100289098 [Source:NCBI gene (formerly Entrezgene);Acc:100289098]	chr7	66493607	66495758	1	q11.21	53.07	lncRNA	1262
Up	ENSG00000282851	BISPR	-	1	BST2 interferon stimulated positive regulator [Source:HGNC Symbol;Acc:HGNC:51290]	chr19	17405686	17419324	1	p13.11	47.97	lncRNA	3045
Up	ENSG00000234694	ENSG00000234694	-	1	novel transcript	chr1	43354684	43358658	-1	p34.2	47.42	lncRNA	661
Up	ENSG00000281641	SAMD12-AS1	-	1	SAMD12 antisense RNA 1 [Source:HGNC Symbol;Acc:HGNC:30937]	chr8	118620498	118906155	1	q24.12	38.12	lncRNA	3781
Up	ENSG00000261071	ENSG00000261071	[169]	1	novel transcript, antisense to NOL7	chr6	13614111	13615155	-1	p23	54.16	lncRNA	1045
Up	ENSG00000232931	LINC00342	-	1	long intergenic non-protein coding RNA 342 [Source:HGNC Symbol;Acc:HGNC:42470]	chr2	95807052	95835003	-1	q11.1	43.14	lncRNA	8599
Up	ENSG00000227733	ENSG00000227733	-	1	novel transcript	chr1	148159213	148255012	-1	q21.2	40.81	lncRNA	16052
Up	ENSG00000196741	LINC01560	-	1	long intergenic non-protein coding RNA 1560 [Source:HGNC Symbol;Acc:HGNC:27333]	chrX	47483571	47484823	1	p11.3	39.98	lncRNA	1253
Up	ENSG00000278175	GLIDR	-	1	glioblastoma down-regulated RNA [Source:HGNC Symbol;Acc:HGNC:48823]	chr9	39748514	39810097	-1	p12	40.28	lncRNA	6628
Up	ENSG00000257698	GIHCG	[175]	1	GIHCG inhibitor of miR-200b/200a/429 expression [Source:HGNC Symbol;Acc:HGNC:52649]	chr12	57930115	57936345	-1	q14.1	38.98	lncRNA	4058
Up	ENSG00000246877	DNM1P35	-	1	dynamin 1 pseudogene 35 [Source:HGNC Symbol;Acc:HGNC:35182]	chr15	75727670	75738623	-1	q24.2	56.34	lncRNA	3188
Up	ENSG00000224157	HCG14	[146]	1	HLA complex group 14 [Source:HGNC Symbol;Acc:HGNC:18323]	chr6	28896530	28897322	1	p22.1	51.58	lncRNA	413
Up	ENSG00000206337	HCP5	[213]	1	HLA complex P5 [Source:HGNC Symbol;Acc:HGNC:21659]	chr6	31463170	31478936	1	p21.33	49.39	lncRNA	11058
Up	ENSG00000236532	LINC01695	-	1	long intergenic non-protein coding RNA 1695 [Source:HGNC Symbol;Acc:HGNC:52483]	chr21	28116094	28228667	-1	q21.3	36.7	lncRNA	5319
Up	ENSG00000247092	SNHG10	[218]	1	small nucleolar RNA host gene 10 [Source:HGNC Symbol;Acc:HGNC:27510]	chr14	95521943	95534889	-1	q32.13	44.55	lncRNA	5437
Up	ENSG00000255135	ENSG00000255135	-	2	novel transcript	chr11	76435559	76444687	-1	q13.5	43.4	lncRNA	1056
Up	ENSG00000281920	ENSG00000281920	-	1	novel transcript	chr2	65623272	65628424	1	p14	39.08	lncRNA	744
Up	ENSG00000272379	ENSG00000272379	-	1	novel transcript	chr6	13290018	13290490	-1	p24.1	37.63	lncRNA	473
Up	ENSG00000272663	PPP1R21-DT	-	1	PPP1R21 divergent transcript [Source:HGNC Symbol;Acc:HGNC:55206]	chr2	48440043	48440597	-1	p16.3	47.03	lncRNA	555
Up	ENSG00000273456	ENSG00000273456	-	1	novel transcript	chr2	202374932	202375604	-1	q33.1	51.56	lncRNA	673
Up	ENSG00000231607	DLEU2	-	1	deleted in lymphocytic leukemia 2 [Source:HGNC Symbol;Acc:HGNC:13748]	chr13	49956670	50125720	-1	q14.2	38.87	lncRNA	11574
Up	ENSG00000212978	ENSG00000212978	-	1	novel transcript	chr2	61141592	61144969	-1	p15	45.77	lncRNA	3109
Up	ENSG00000245556	SCAMP1-AS1	-	1	SCAMP1 antisense RNA 1 [Source:HGNC Symbol;Acc:HGNC:50544]	chr5	78342365	78360507	-1	q14.1	42.36	lncRNA	5028
Up	ENSG00000251002	ENSG00000251002	-	1	novel transcript, antisense to IG_gene_cluster	chr14	22197446	22482959	-1	q11.2	40.42	lncRNA	9092
Up	ENSG00000267100	ILF3-DT	-	1	ILF3 divergent transcript [Source:HGNC Symbol;Acc:HGNC:27115]	chr19	10651862	10653844	-1	p13.2	51.64	lncRNA	1983
Up	ENSG00000242759	LINC00882	-	1	long intergenic non-protein coding RNA 882 [Source:HGNC Symbol;Acc:HGNC:48568]	chr3	106449775	107240671	-1	q13.12	37.1	lncRNA	19150
Up	ENSG00000227630	LINC01132	[258]	1	long intergenic non-protein coding RNA 1132 [Source:HGNC Symbol;Acc:HGNC:49444]	chr1	234724042	234736720	1	q42.3	51.03	lncRNA	5083
Up	ENSG00000247137	ENSG00000247137	-	1	novel transcript	chr11	83184491	83193794	-1	q14.1	40.91	lncRNA	3418
Up	ENSG00000183242	WT1-AS	[260]	3	WT1 antisense RNA [Source:HGNC Symbol;Acc:HGNC:18135]	chr11	32435518	32458769	1	p13	44.72	lncRNA	5561
Up	ENSG00000228223	HCG11	[263]	1	HLA complex group 11 [Source:HGNC Symbol;Acc:HGNC:17707]	chr6	26521709	26527404	1	p22.2	41.73	lncRNA	5696
Up	ENSG00000283141	LINC02666	-	1	long intergenic non-protein coding RNA 2666 [Source:HGNC Symbol;Acc:HGNC:54152]	chr10	129784983	129806971	1	q26.3	45.51	lncRNA	1005
Up	ENSG00000240207	ENSG00000240207	-	1	novel transcript, antisense to RARRES1	chr3	158732263	158784070	1	q25.32	43.38	lncRNA	6252
Up	ENSG00000234076	TPRG1-AS1	-	1	TPRG1 antisense RNA 1 [Source:HGNC Symbol;Acc:HGNC:42391]	chr3	188941715	188947639	-1	q28	42.62	lncRNA	697
Up	ENSG00000248596	ENSG00000248596	-	1	novel transcript	chr5	176143085	176185155	-1	q35.2	43.36	lncRNA	3632
Up	ENSG00000237491	LINC01409	-	1	long intergenic non-protein coding RNA 1409 [Source:HGNC Symbol;Acc:HGNC:50701]	chr1	778747	810065	1	p36.33	40.44	lncRNA	8413
Up	ENSG00000221857	ENSG00000221857	-	1	novel transcript	chr19	35138824	35151336	1	q13.12	55.33	lncRNA	735
Up	ENSG00000152931	PART1	[18]	2	prostate androgen-regulated transcript 1 [Source:HGNC Symbol;Acc:HGNC:17263]	chr5	60487713	60548813	1	q12.1	39.96	lncRNA	12703
Up	ENSG00000251538	LINC02201	-	1	long intergenic non-protein coding RNA 2201 [Source:HGNC Symbol;Acc:HGNC:53067]	chr5	122628952	122730685	-1	q23.2	38.39	lncRNA	3741
Up	ENSG00000278611	ZNF426-DT	[247]	1	ZNF426 divergent transcript [Source:HGNC Symbol;Acc:HGNC:53777]	chr19	9538693	9539734	1	p13.2	49.62	lncRNA	905
Up	ENSG00000259038	ENSG00000259038	-	1	novel transcript, antisense to RAD51L1	chr14	68627166	68628445	-1	q24.1	48.12	lncRNA	279
Up	ENSG00000272463	ENSG00000272463	-	1	novel transcript	chr6	708592	711405	-1	p25.3	39.45	lncRNA	2814
Up	ENSG00000276980	ENSG00000276980	-	1	novel transcript, sense intronic C3	chr19	6716386	6717742	-1	p13.3	49.45	lncRNA	1357
Up	ENSG00000231652	ENSG00000231652	-	1	novel transcript	chr6	73693903	73696131	-1	q13	45.94	lncRNA	1973
Up	ENSG00000254333	NDST1-AS1	-	1	NDST1 antisense RNA 1 [Source:HGNC Symbol;Acc:HGNC:52899]	chr5	150475531	150485968	-1	q33.1	50.59	lncRNA	368
Up	ENSG00000260088	DDX59-AS1	-	1	DDX59 antisense RNA 1 [Source:HGNC Symbol;Acc:HGNC:41094]	chr1	200669507	200694250	1	q32.1	40.65	lncRNA	736
Up	ENSG00000236740	ENSG00000236740	-	1	novel transcript	chr6	53930022	53997667	1	p12.1	38.87	lncRNA	3227
Up	ENSG00000235724	ENSG00000235724	-	1	novel transcript, antisense to TANK	chr2	161222785	161308389	-1	q24.2	37.75	lncRNA	3538
Up	ENSG00000273557	ENSG00000273557	-	1	novel transcript, sense intronic to PCDHG cluster	chr5	141468465	141471528	1	q31.3	43.6	lncRNA	335
Up	ENSG00000224884	ENSG00000224884	-	1	novel transcript	chr3	8573726	8593124	-1	p25.3	42.93	lncRNA	561
Up	ENSG00000234779	BNC2-AS1	-	1	BNC2 antisense RNA 1 [Source:HGNC Symbol;Acc:HGNC:53727]	chr9	16726814	16727524	1	p22.2	61.04	lncRNA	428
Up	ENSG00000282386	ENSG00000282386	-	1	novel transcript, antisense to SLC39A1	chr1	153964361	153965070	1	q21.3	45.63	lncRNA	710
Up	ENSG00000255750	ENSG00000255750	-	1	novel transcript, antisense to SSPN	chr12	26229548	26319720	-1	p11.23	41.38	lncRNA	2399
Up	ENSG00000272695	GAS6-DT	-	1	GAS6 divergent transcript [Source:HGNC Symbol;Acc:HGNC:43694]	chr13	113864112	113866834	1	q34	45.87	lncRNA	2009
Up	ENSG00000271917	ENSG00000271917	-	1	novel transcript	chr1	164828436	164829952	1	q23.3	36.85	lncRNA	1517
Up	ENSG00000275479	ENSG00000275479	-	1	novel transcript	chr17	80149627	80149798	1	q25.3	34.3	lncRNA	172
Up	ENSG00000272734	ADIRF-AS1	-	1	ADIRF antisense RNA 1 [Source:HGNC Symbol;Acc:HGNC:45127]	chr10	86965345	86971311	-1	q23.2	59.28	lncRNA	5748
Up	ENSG00000237387	ENSG00000237387	-	1	novel transcript	chr22	25580241	25581382	-1	q12.1	44.66	lncRNA	660
Up	ENSG00000255153	TOLLIP-AS1	-	1	TOLLIP antisense RNA 1 (head to head) [Source:HGNC Symbol;Acc:HGNC:27403]	chr11	1309769	1310707	1	p15.5	60.38	lncRNA	939
Up	ENSG00000205791	LOH12CR2	[282]	1	loss of heterozygosity on chromosome 12, region 2 [Source:HGNC Symbol;Acc:HGNC:26524]	chr12	12355406	12357067	-1	p13.2	45.19	lncRNA	1540
Up	ENSG00000276742	ENSG00000276742	-	1	novel transcript, antisense to NSMCE4A	chr10	121956782	121957098	1	q26.13	37.22	lncRNA	317
Up	ENSG00000274104	ENSG00000274104	-	1	novel transcript	chr19	34733298	34733837	-1	q13.11	49.81	lncRNA	540
Up	ENSG00000232973	CYP1B1-AS1	[34]	1	CYP1B1 antisense RNA 1 [Source:HGNC Symbol;Acc:HGNC:28543]	chr2	38073447	38231651	1	p22.2	42.28	lncRNA	10511
Up	ENSG00000273265	CNNM3-DT	-	1	CNNM3 divergent transcript [Source:HGNC Symbol;Acc:HGNC:53592]	chr2	96812239	96813657	-1	q11.2	45.74	lncRNA	415
Up	ENSG00000250303	LINC02762	-	1	long intergenic non-protein coding RNA 2762 [Source:HGNC Symbol;Acc:HGNC:27443]	chr11	112270749	112362534	1	q23.1	45.04	lncRNA	5965
Up	ENSG00000273355	ENSG00000273355	-	1	novel transcript	chr18	813274	813756	1	p11.32	38.92	lncRNA	483
Up	ENSG00000272420	ENSG00000272420	-	1	novel transcript, sense intronic to MORN1	chr1	2363061	2363628	-1	p36.32	36.09	lncRNA	568
Up	ENSG00000270084	GAS5-AS1	-	1	GAS5 antisense RNA 1 [Source:HGNC Symbol;Acc:HGNC:44119]	chr1	173862473	173863941	1	q25.1	44.18	lncRNA	814
Up	ENSG00000234166	ARHGEF19-AS1	-	1	ARHGEF19 antisense RNA 1 [Source:HGNC Symbol;Acc:HGNC:39996]	chr1	16197854	16198357	1	p36.13	49.4	lncRNA	439
Up	ENSG00000262721	ENSG00000262721	-	1	novel transcript	chr16	30875766	30895216	-1	p11.2	52.43	lncRNA	561
Up	ENSG00000278376	ENSG00000278376	-	1	novel transcript	chr11	118791254	118793137	1	q23.3	59.02	lncRNA	1884
Up	ENSG00000204934	ATP6V0E2-AS1	-	1	ATP6V0E2 antisense RNA 1 [Source:HGNC Symbol;Acc:HGNC:44180]	chr7	149867697	149880610	-1	q36.1	53.74	lncRNA	3291
Up	ENSG00000235314	LINC00957	-	1	long intergenic non-protein coding RNA 957 [Source:HGNC Symbol;Acc:HGNC:22332]	chr7	44039171	44042306	1	p13	61	lncRNA	2703
Up	ENSG00000273026	ENSG00000273026	-	1	novel transcript, antisense to SLC39A1	chr1	153966516	153966930	1	q21.3	43.61	lncRNA	415
Up	ENSG00000260260	SNHG19	-	1	small nucleolar RNA host gene 19 [Source:HGNC Symbol;Acc:HGNC:49574]	chr16	2154797	2155358	-1	p13.3	54.09	lncRNA	342
Up	ENSG00000234741	GAS5	[283]	1	growth arrest specific 5 [Source:HGNC Symbol;Acc:HGNC:16355]	chr1	173858559	173868882	-1	q25.1	44.51	lncRNA	4842
Up	ENSG00000273333	ENSG00000273333	-	1	novel transcript	chr6	32184733	32185882	-1	p21.32	44.78	lncRNA	662
Up	ENSG00000267106	ZNF561-AS1	-	1	ZNF561 antisense RNA 1 (head to head) [Source:HGNC Symbol;Acc:HGNC:27613]	chr19	9621249	9647203	1	p13.2	44.38	lncRNA	8073
Up	ENSG00000273344	PAXIP1-DT	-	1	PAXIP1 divergent transcript [Source:HGNC Symbol;Acc:HGNC:27328]	chr7	155003448	155005703	1	q36.2	48.32	lncRNA	2256
Up	ENSG00000269427	ENSG00000269427	-	1	novel transcript, antisense C19orf42	chr19	16630743	16643942	1	p13.11	47.12	lncRNA	533
Up	ENSG00000254682	ENSG00000254682	-	1	novel transcript	chr11	71448674	71452157	1	q13.4	45.01	lncRNA	680
Up	ENSG00000231770	TMEM44-AS1	-	1	TMEM44 antisense RNA 1 [Source:HGNC Symbol;Acc:HGNC:44272]	chr3	194584004	194590260	1	q29	48.41	lncRNA	1586
Up	ENSG00000257027	ENSG00000257027	-	1	novel transcript	chr12	9658567	9662085	1	p13.31	41.43	lncRNA	2508
Up	ENSG00000229619	MBNL1-AS1	-	1	MBNL1 antisense RNA 1 [Source:HGNC Symbol;Acc:HGNC:44584]	chr3	152245262	152269557	-1	q25.1	37.36	lncRNA	8230
Up	ENSG00000250988	SNHG21	-	1	small nucleolar RNA host gene 21 [Source:HGNC Symbol;Acc:HGNC:50284]	chr15	82750564	82757206	1	q25.2	40.87	lncRNA	1053
Up	ENSG00000267321	SNHG30	-	1	small nucleolar RNA host gene 30 [Source:HGNC Symbol;Acc:HGNC:52836]	chr17	35568076	35574900	1	q12	44.32	lncRNA	1594
Up	ENSG00000235495	ENSG00000235495	-	1	novel transcript	chr2	67565604	67684077	-1	p14	39.06	lncRNA	167
Up	ENSG00000228437	LINC02474	[284]	1	long intergenic non-protein coding RNA 2474 [Source:HGNC Symbol;Acc:HGNC:53417]	chr1	221966341	221984964	1	q41	43.46	lncRNA	1366
Up	ENSG00000196668	LINC00173	-	1	long intergenic non-protein coding RNA 173 [Source:HGNC Symbol;Acc:HGNC:33791]	chr12	116533422	116536518	1	q24.22	50.76	lncRNA	2607
Up	ENSG00000283235	ENSG00000283235	-	1	novel transcript	chr5	176173345	176199295	-1	q35.2	51.56	lncRNA	3019
Up	ENSG00000231769	ENSG00000231769	-	1	novel transcript	chr6	46096004	46129857	-1	p21.1	40.06	lncRNA	1979
Up	ENSG00000274204	ENSG00000274204	-	1	novel transcript, sense intronic to EFNB2	chr13	106506046	106506713	-1	q33.3	39.22	lncRNA	668
Up	ENSG00000229847	EMX2OS	[285]	1	EMX2 opposite strand/antisense RNA [Source:HGNC Symbol;Acc:HGNC:18511]	chr10	117473215	117545068	-1	q26.11	47.72	lncRNA	8918
Up	ENSG00000267886	ENSG00000267886	-	1	novel transcript	chr19	23075201	23100361	1	p12	45.02	lncRNA	967
Up	ENSG00000269970	ENSG00000269970	-	1	novel transcript, sense intronic to PTGS1	chr9	122372605	122372825	1	q33.2	45.7	lncRNA	221
Up	ENSG00000240137	ERICH6-AS1	-	1	ERICH6 antisense RNA 1 [Source:HGNC Symbol;Acc:HGNC:41205]	chr3	150703564	150723005	1	q25.1	42.86	lncRNA	5691
Up	ENSG00000276232	ENSG00000276232	-	1	small Cajal body-specific RNA 10	chr12	6510275	6510522	1	p13.31	45.97	lncRNA	248
Up	ENSG00000270141	TERC	-	1	telomerase RNA component [Source:HGNC Symbol;Acc:HGNC:11727]	chr3	169764520	169765060	-1	q26.2	66.73	lncRNA	541
Up	ENSG00000280594	BTG3-AS1	-	1	BTG3 antisense RNA 1 [Source:HGNC Symbol;Acc:HGNC:53145]	chr21	17611744	17633199	1	q21.1	41.93	lncRNA	2578
Up	ENSG00000231064	THBS3-AS1	-	1	THBS3 antisense RNA 1 [Source:HGNC Symbol;Acc:HGNC:40582]	chr1	155195004	155205495	1	q22	55.17	lncRNA	2466
Up	ENSG00000273061	CDC37L1-DT	[163]	1	CDC37L1 divergent transcript [Source:HGNC Symbol;Acc:HGNC:49735]	chr9	4676600	4679502	-1	p24.1	41.23	lncRNA	613
Up	ENSG00000259456	ADNP-AS1	-	1	ADNP antisense RNA 1 [Source:HGNC Symbol;Acc:HGNC:51227]	chr20	50930984	50945148	1	q13.13	41.57	lncRNA	1049
Up	ENSG00000166770	ZNF667-AS1	[286]	1	ZNF667 antisense RNA 1 (head to head) [Source:HGNC Symbol;Acc:HGNC:44321]	chr19	56477250	56504362	1	q13.43	43.23	lncRNA	12170
Up	ENSG00000267470	ZNF571-AS1	-	1	ZNF571 antisense RNA 1 [Source:HGNC Symbol;Acc:HGNC:44324]	chr19	37548914	37587348	1	q13.12	41.03	lncRNA	7599
Up	ENSG00000248515	ENSG00000248515	-	1	novel transcript	chr4	19455418	19938448	1	p15.31	36.59	lncRNA	4694
Up	ENSG00000177788	ENSG00000177788	-	1	novel transcript	chr1	229256892	229271242	-1	q42.13	45.03	lncRNA	8197
Up	ENSG00000239523	MYLK-AS1	-	1	MYLK antisense RNA 1 [Source:HGNC Symbol;Acc:HGNC:42440]	chr3	123585300	123644568	1	q21.1	44.2	lncRNA	4496
Up	ENSG00000271133	ITGB8-AS1	-	1	ITGB8 antisense RNA 1 [Source:HGNC Symbol;Acc:HGNC:55257]	chr7	20328299	20331747	-1	p21.1	52.28	lncRNA	896
Up	ENSG00000269887	ENSG00000269887	-	1	novel transcript, sense intronic to PBX1	chr1	164680085	164680799	1	q23.3	33.15	lncRNA	715
Up	ENSG00000204261	PSMB8-AS1	[246]	1	PSMB8 antisense RNA 1 (head to head) [Source:HGNC Symbol;Acc:HGNC:39758]	chr6	32844078	32846500	1	p21.32	52.21	lncRNA	2423
Up	ENSG00000227388	ENSG00000227388	-	1	novel transcript	chr9	35772163	35790432	1	p13.3	43.4	lncRNA	4094
Up	ENSG00000267280	TBX2-AS1	[287]	1	TBX2 antisense RNA 1 [Source:HGNC Symbol;Acc:HGNC:50355]	chr17	61393456	61411555	-1	q23.2	62.75	lncRNA	1206
Up	ENSG00000273058	ENSG00000273058	-	1	novel transcript	chr1	236536162	236536704	-1	q43	52.85	lncRNA	543
Up	ENSG00000226686	LINC01535	[288]	1	long intergenic non-protein coding RNA 1535 [Source:HGNC Symbol;Acc:HGNC:51282]	chr19	37251885	37265535	1	q13.12	44.52	lncRNA	4381
Up	ENSG00000272871	ENSG00000272871	-	1	novel transcript	chr9	14588797	14590065	-1	p22.3	37.9	lncRNA	1269
Up	ENSG00000279277	ENSG00000279277	-	1	novel transcript	chr3	108032456	108039916	-1	q13.12	44.39	lncRNA	7461
Up	ENSG00000273211	ENSG00000273211	-	1	novel transcript, antisense to ARIH2	chr3	48985485	48985963	-1	p21.31	51.15	lncRNA	479
Up	ENSG00000203739	PRDX6-AS1	-	1	PRDX6 antisense RNA 1 [Source:HGNC Symbol;Acc:HGNC:54870]	chr1	173417793	173489407	-1	q25.1	40.71	lncRNA	4797
Up	ENSG00000270066	ENSG00000270066	-	1	small Cajal body-specific RNA 2	chr1	109100193	109100619	1	p13.3	65.81	lncRNA	427
Up	ENSG00000257337	ENSG00000257337	-	1	novel transcript, antisense to TENC1 & EIF4B	chr12	53012884	53054450	-1	q13.13	47.06	lncRNA	7742
Up	ENSG00000241769	LINC00893	[218]	1	long intergenic non-protein coding RNA 893 [Source:HGNC Symbol;Acc:HGNC:44265]	chrX	149527591	149540959	-1	q28	52.08	lncRNA	3604
Up	ENSG00000245149	RNF139-AS1	-	1	RNF139 antisense RNA 1 (head to head) [Source:HGNC Symbol;Acc:HGNC:48940]	chr8	124462485	124474582	-1	q24.13	41.49	lncRNA	6949
Up	ENSG00000224699	LAMTOR5-AS1	-	1	LAMTOR5 antisense RNA 1 [Source:HGNC Symbol;Acc:HGNC:40823]	chr1	110347116	110443817	1	p13.3	43.14	lncRNA	12654
Up	ENSG00000213742	ZNF337-AS1	-	1	ZNF337 antisense RNA 1 [Source:HGNC Symbol;Acc:HGNC:40759]	chr20	25624045	25689032	1	p11.21	40.92	lncRNA	5991
Up	ENSG00000203993	ARRDC1-AS1	-	1	ARRDC1 antisense RNA 1 [Source:HGNC Symbol;Acc:HGNC:23395]	chr9	137615332	137618906	-1	q34.3	56.78	lncRNA	3545
Up	ENSG00000215424	MCM3AP-AS1	-	1	MCM3AP antisense RNA 1 [Source:HGNC Symbol;Acc:HGNC:16417]	chr21	46229196	46259390	1	q22.3	46.51	lncRNA	10023
Up	ENSG00000232995	RGS5	[289]	1	regulator of G protein signaling 5 [Source:NCBI gene (formerly Entrezgene);Acc:8490]	chr1	163244505	163321894	-1	q23.3	37.85	lncRNA	3626
Up	ENSG00000251022	THAP9-AS1	[34]	1	THAP9 antisense RNA 1 [Source:HGNC Symbol;Acc:HGNC:44172]	chr4	82893009	82900960	-1	q21.22	39.31	lncRNA	4397
Down	ENSG00000231764	DLX6-AS1	[140]	2	DLX6 antisense RNA 1 [Source:HGNC Symbol;Acc:HGNC:37151]	chr7	96955141	97014088	-1	q21.3	42.6	lncRNA	16907
Down	ENSG00000248538	ENSG00000248538	-	1	novel transcript	chr8	9151695	9425524	1	p23.1	43.4	lncRNA	17427
Down	ENSG00000177335	C8orf31	-	1	chromosome 8 open reading frame 31 [Source:HGNC Symbol;Acc:HGNC:26731]	chr8	143039209	143060684	1	q24.3	50.99	lncRNA	4087
Down	ENSG00000229404	LINC00858	[151]	1	long intergenic non-protein coding RNA 858 [Source:HGNC Symbol;Acc:HGNC:27276]	chr10	84267747	84294659	1	q23.1	40.69	lncRNA	4726
Down	ENSG00000228315	GUSBP11	-	1	GUSB pseudogene 11 [Source:HGNC Symbol;Acc:HGNC:42325]	chr22	23638487	23717356	-1	q11.23	50.35	lncRNA	7764
Down	ENSG00000233237	LINC00472	[222]	1	long intergenic non-protein coding RNA 472 [Source:HGNC Symbol;Acc:HGNC:21380]	chr6	71343427	71420745	-1	q13	37.13	lncRNA	19875
Down	ENSG00000248810	LINC02432	-	1	long intergenic non-protein coding RNA 2432 [Source:HGNC Symbol;Acc:HGNC:53363]	chr4	141302910	141357096	-1	q31.21	38.71	lncRNA	7305
Down	ENSG00000270164	LINC01480	-	1	long intergenic non-protein coding RNA 1480 [Source:HGNC Symbol;Acc:HGNC:51124]	chr19	41535183	41536904	1	q13.2	40.77	lncRNA	1722
Down	ENSG00000232814	COL4A2-AS1	-	1	COL4A2 antisense RNA 1 [Source:HGNC Symbol;Acc:HGNC:40156]	chr13	110502575	110508179	-1	q34	56.32	lncRNA	540
Down	ENSG00000197989	SNHG12	[276]	1	small nucleolar RNA host gene 12 [Source:HGNC Symbol;Acc:HGNC:30062]	chr1	28578538	28583132	-1	p35.3	50.99	lncRNA	4266
Down	ENSG00000227248	FAM155A-IT1	-	2	FAM155A intronic transcript 1 [Source:HGNC Symbol;Acc:HGNC:41503]	chr13	107788342	107835451	-1	q33.3	35.94	lncRNA	819
Down	ENSG00000253389	ENSG00000253389	-	1	novel transcript, antisense to ANK1	chr8	41660991	41665566	1	p11.21	54.94	lncRNA	1374
Down	ENSG00000185332	TMEM105	-	1	TMEM105 long non-coding RNA [Source:HGNC Symbol;Acc:HGNC:26794]	chr17	81311270	81330674	-1	q25.3	58.76	lncRNA	3794
Down	ENSG00000225606	ENSG00000225606	-	1	novel transcript	chr7	12570125	12571392	-1	p21.3	58.36	lncRNA	911
Down	ENSG00000236384	LINC00479	-	1	long intergenic non-protein coding RNA 479 [Source:HGNC Symbol;Acc:HGNC:19727]	chr21	41711520	41715775	-1	q22.3	52.87	lncRNA	2114
Down	ENSG00000261235	ENSG00000261235	-	1	novel transcript, antisense to HSD17B2	chr16	82044336	82139631	-1	q23.3	41.47	lncRNA	1030
Down	ENSG00000254340	ENSG00000254340	-	1	novel transcript	chr8	9141424	9145503	1	p23.1	40.64	lncRNA	719
Down	ENSG00000258858	ENSG00000258858	-	1	novel transcript, antisense to INF2	chr14	104690091	104691284	-1	q32.33	63.23	lncRNA	716
Down	ENSG00000255404	ENSG00000255404	-	1	novel transcript	chr11	65795946	65797219	-1	q13.1	51.41	lncRNA	1044
Down	ENSG00000275092	ENSG00000275092	-	1	novel transcript, sense intronic to MAPK8IP3	chr16	1707252	1707973	1	p13.3	46.68	lncRNA	722
Down	ENSG00000265656	ENSG00000265656	-	1	novel transcript, antisense to ABHD3	chr18	21673628	21682561	1	q11.2	43.35	lncRNA	447
Down	ENSG00000259520	ENSG00000259520	-	1	novel transcript, antisense to SLC28A2	chr15	45235930	45279251	-1	q21.1	42.09	lncRNA	4290
Down	ENSG00000237424	FOXD2-AS1	[290]	1	FOXD2 adjacent opposite strand RNA 1 [Source:HGNC Symbol;Acc:HGNC:44256]	chr1	47432133	47434641	-1	p33	58.67	lncRNA	2509
Down	ENSG00000277559	ENSG00000277559	-	1	novel transcript	chr16	54290965	54292422	1	q12.2	53.02	lncRNA	1458
Down	ENSG00000254129	ENSG00000254129	-	1	novel transcript, antisense to KIF13B	chr8	29110573	29140729	1	p12	40.99	lncRNA	694
Down	ENSG00000233893	EZR-AS1	-	1	EZR antisense RNA 1 [Source:HGNC Symbol;Acc:HGNC:40609]	chr6	158817979	158822252	1	q25.3	56.34	lncRNA	362
Down	ENSG00000242797	GLYCTK-AS1	-	1	GLYCTK antisense RNA 1 [Source:HGNC Symbol;Acc:HGNC:41043]	chr3	52288580	52299067	-1	p21.2	57.65	lncRNA	1391
Down	ENSG00000261471	ENSG00000261471	-	1	novel transcript, antisense to COTL1	chr16	84594393	84596826	1	q24.1	52.01	lncRNA	2434
Down	ENSG00000224821	COL4A2-AS2	-	1	COL4A2 antisense 2 [Source:HGNC Symbol;Acc:HGNC:39849]	chr13	110456396	110463287	-1	q34	51.67	lncRNA	1522
Down	ENSG00000259342	ENSG00000259342	-	1	novel transcript, antisense to C15orf48	chr15	45430652	45441808	-1	q21.1	40.88	lncRNA	729
Down	ENSG00000255929	ENSG00000255929	-	1	novel transcript	chr11	94545330	94740355	-1	q21	40.53	lncRNA	1175
Down	ENSG00000258908	ENSG00000258908	-	1	novel transcript	chr14	20474789	20477089	-1	q11.2	47.07	lncRNA	492
Down	ENSG00000243055	GK-AS1	-	1	GK antisense RNA 1 [Source:HGNC Symbol;Acc:HGNC:40255]	chrX	30699998	30724174	-1	p21.2	37.91	lncRNA	651
Down	ENSG00000264188	ENSG00000264188	-	1	novel transcript	chr18	21661787	21662395	-1	q11.2	52.87	lncRNA	336
Down	ENSG00000273055	ENSG00000273055	-	1	novel transcript, antisense to LAMB1	chr7	107942116	107942740	1	q31.1	44.8	lncRNA	625
Down	ENSG00000233728	ENSG00000233728	-	1	novel transcript	chr1	37799720	37800879	-1	p34.3	54.91	lncRNA	700
Down	ENSG00000272720	ENSG00000272720	-	1	novel transcript, antisense to BAIAP2L2	chr22	38090127	38091559	1	q13.1	48.15	lncRNA	1433
Down	ENSG00000255443	CD44-AS1	-	1	CD44 antisense RNA 1 [Source:HGNC Symbol;Acc:HGNC:40133]	chr11	35210343	35214985	-1	p13	37.67	lncRNA	587
Down	ENSG00000259607	ENSG00000259607	-	1	novel transcript, antisense to KIF13B	chr8	29067279	29068454	1	p12	55.7	lncRNA	585
Down	ENSG00000265474	ENSG00000265474	-	1	novel transcript, antisense to TRAF4	chr17	28745569	28747652	-1	q11.2	60.94	lncRNA	521
Down	ENSG00000276166	ENSG00000276166	-	1	novel transcript, antisense to KIFC3	chr16	57759358	57760024	1	q21	60.57	lncRNA	667
Down	ENSG00000261123	ENSG00000261123	-	1	novel transcript, intronic to PKD1	chr16	2094830	2097026	-1	p13.3	54.39	lncRNA	596
Down	ENSG00000236662	ENSG00000236662	-	1	novel transcript, antisense to SEMA4G	chr10	100980507	100985614	-1	q24.31	53.25	lncRNA	342
Down	ENSG00000267750	RUNDC3A-AS1	-	1	RUNDC3A antisense RNA 1 [Source:HGNC Symbol;Acc:HGNC:51344]	chr17	44299574	44315315	-1	q21.31	52.53	lncRNA	5507
Down	ENSG00000269646	ENSG00000269646	-	1	novel transcript	chr19	52923382	52924075	1	q13.41	52.45	lncRNA	486
Down	ENSG00000255438	ENSG00000255438	-	1	novel transcript, antisense to SULF2	chr20	47677901	47686297	1	q13.12	53.63	lncRNA	2437
Down	ENSG00000260798	ENSG00000260798	-	1	novel transcript, antisense to CDH1	chr16	68814330	68823526	-1	q22.1	45.51	lncRNA	562
Down	ENSG00000263345	ENSG00000263345	-	1	novel transcript, antisense to SGSM2	chr17	2375061	2379306	-1	p13.3	57.58	lncRNA	1234
Down	ENSG00000271984	ENSG00000271984	-	1	novel transcript, antisense to CTSA	chr20	45892694	45893419	-1	q13.12	56.06	lncRNA	569
Down	ENSG00000267149	ENSG00000267149	-	1	novel transcript	chr19	55027593	55053928	-1	q13.42	51.22	lncRNA	1271
Down	ENSG00000265678	ENSG00000265678	-	1	novel transcript, antisense CCDC57	chr17	82153430	82154815	1	q25.3	58.15	lncRNA	555
Down	ENSG00000268530	ENSG00000268530	-	1	novel transcript, antisense to KCNJ14	chr19	48465348	48469693	-1	q13.33	54.14	lncRNA	1861
Down	ENSG00000253200	ENSG00000253200	-	1	novel transcript, antisense to KIAA1967	chr8	22613908	22616657	-1	p21.3	55.27	lncRNA	2750
Down	ENSG00000272589	ZSWIM8-AS1	[194]	1	ZSWIM8 antisense RNA 1 [Source:HGNC Symbol;Acc:HGNC:45103]	chr10	73796514	73801399	-1	q22.2	56.14	lncRNA	1460
Down	ENSG00000260121	ENSG00000260121	-	1	novel transcript, antisense to FAM38A	chr16	88718615	88720459	1	q24.3	59.19	lncRNA	1845
Down	ENSG00000257653	ENSG00000257653	-	1	novel transcript, antisense to ADCY6	chr12	48766194	48767323	1	q13.12	52.12	lncRNA	713
Down	ENSG00000269352	PTOV1-AS2	-	1	PTOV1 antisense RNA 2 [Source:HGNC Symbol;Acc:HGNC:51284]	chr19	49856970	49859289	-1	q13.33	64.31	lncRNA	1023
Down	ENSG00000236283	ENSG00000236283	-	1	novel transcript, antisense to SLC38A11 and SCN3A	chr2	164840661	165208261	1	q24.3	36.49	lncRNA	10261
Down	ENSG00000251026	LINC02163	-	1	long intergenic non-protein coding RNA 2163 [Source:HGNC Symbol;Acc:HGNC:53024]	chr5	104079847	104406121	1	q21.2	34.07	lncRNA	2511
Down	ENSG00000229155	LINC02038	-	1	long intergenic non-protein coding RNA 2038 [Source:HGNC Symbol;Acc:HGNC:52878]	chr3	193842560	193844024	-1	q29	50.1	lncRNA	984
Down	ENSG00000276476	LINC00540	-	1	long intergenic non-protein coding RNA 540 [Source:NCBI gene (formerly Entrezgene);Acc:100506622]	chr13	22040972	22276526	1	q12.11	41.05	lncRNA	3099
Down	ENSG00000245750	DRAIC	-	1	downregulated RNA in cancer, inhibitor of cell invasion and migration [Source:HGNC Symbol;Acc:HGNC:27082]	chr15	69462921	69843120	1	q23	46.45	lncRNA	31253
Down	ENSG00000225431	LINC01671	-	1	long intergenic non-protein coding RNA 1671 [Source:HGNC Symbol;Acc:HGNC:52459]	chr21	42599280	42615058	-1	q22.3	45.07	lncRNA	1775
Down	ENSG00000241388	HNF1A-AS1	-	1	HNF1A antisense RNA 1 [Source:HGNC Symbol;Acc:HGNC:26785]	chr12	120941728	120980965	-1	q24.31	49.08	lncRNA	4671
Down	ENSG00000273328	ENSG00000273328	-	1	novel transcript	chr3	42809414	42908105	1	p22.1	44.31	lncRNA	3933
Down	ENSG00000261116	ENSG00000261116	-	1	novel transcript, overlapping to FAM83B	chr6	54943167	54945099	1	p12.1	32.9	lncRNA	1933
Down	ENSG00000215483	LINC00598	-	1	long intergenic non-protein coding RNA 598 [Source:HGNC Symbol;Acc:HGNC:42770]	chr13	40079106	40535807	-1	q14.11	43	lncRNA	19673
Down	ENSG00000247556	OIP5-AS1	[291]	1	OIP5 antisense RNA 1 [Source:HGNC Symbol;Acc:HGNC:43563]	chr15	41283990	41309737	1	q15.1	41.46	lncRNA	12673

## Sheet: Clear cell
Status	Gene_ID	Gene_name	Previous references in EOC	# of studies	Gene_description	Chromosome_scaffold_name	Gene_start_bp	Gene_end_bp	Strand	Karyotype_band	Gene_GC_content	Gene_type	Gene_Length
Up	ENSG00000233237	LINC00472	[222]	4	long intergenic non-protein coding RNA 472 [Source:HGNC Symbol;Acc:HGNC:21380]	chr6	71343427	71420745	-1	q13	37.13	lncRNA	19875
Up	ENSG00000197989	SNHG12	[276]	4	small nucleolar RNA host gene 12 [Source:HGNC Symbol;Acc:HGNC:30062]	chr1	28578538	28583132	-1	p35.3	50.99	lncRNA	4266
Up	ENSG00000177335	C8orf31	-	3	chromosome 8 open reading frame 31 [Source:HGNC Symbol;Acc:HGNC:26731]	chr8	143039209	143060684	1	q24.3	50.99	lncRNA	4087
Up	ENSG00000286546	ENSG00000286546	-	2	novel transcript, antisense to MACROD2	chr20	15892355	15985876	-1	p12.1	38.94	lncRNA	2297
Up	ENSG00000248538	ENSG00000248538	-	2	novel transcript	chr8	9151695	9425524	1	p23.1	43.4	lncRNA	17427
Up	ENSG00000254109	RBPMS-AS1	-	2	RBPMS antisense RNA 1 [Source:HGNC Symbol;Acc:HGNC:48721]	chr8	30382119	30385401	-1	p12	57.3	lncRNA	1522
Up	ENSG00000218416	ENSG00000218416	-	2	novel transcript, antisense to GPC1	chr2	240449315	240456714	-1	q37.3	65.68	lncRNA	3235
Up	ENSG00000227248	FAM155A-IT1	-	2	FAM155A intronic transcript 1 [Source:HGNC Symbol;Acc:HGNC:41503]	chr13	107788342	107835451	-1	q33.3	35.94	lncRNA	819
Up	ENSG00000236283	ENSG00000236283	-	2	novel transcript, antisense to SLC38A11 and SCN3A	chr2	164840661	165208261	1	q24.3	36.49	lncRNA	10261
Up	ENSG00000215483	LINC00598	-	2	long intergenic non-protein coding RNA 598 [Source:HGNC Symbol;Acc:HGNC:42770]	chr13	40079106	40535807	-1	q14.11	43	lncRNA	19673
Up	ENSG00000271992	ENSG00000271992	-	2	novel transcript	chr1	70445071	70445536	1	p31.1	38.41	lncRNA	466
Up	ENSG00000259052	ENSG00000259052	-	2	novel transcript, sense overlapping to SLC25A29	chr14	100279959	100291456	-1	q32.2	54.45	lncRNA	206
Up	ENSG00000253307	ENSG00000253307	-	2	novel transcript	chr8	141252286	141253292	-1	q24.3	51.44	lncRNA	397
Up	ENSG00000223786	ENSG00000223786	-	2	novel transcript	chr6	74069451	74690727	1	q13	36.45	lncRNA	669
Up	ENSG00000257718	CPNE8-AS1	-	2	CPNE8 antisense RNA 1 [Source:HGNC Symbol;Acc:HGNC:53937]	chr12	38906451	38909592	1	q12	39.18	lncRNA	526
Up	ENSG00000224583	ENSG00000224583	-	2	novel transcript	chr6	74642384	74652002	1	q13	36.97	lncRNA	441
Up	ENSG00000264596	ENSG00000264596	-	2	novel transcript, sense intronic to PTPRM	chr18	7814118	7815730	1	p11.23	43.27	lncRNA	1613
Up	ENSG00000274718	ENSG00000274718	-	2	novel transcript	chr13	107870383	107873372	1	q33.3	35.55	lncRNA	2990
Up	ENSG00000187185	ENSG00000187185	-	2	novel transcript	chr16	57798186	57816946	1	q21	52.8	lncRNA	2114
Up	ENSG00000253666	ENSG00000253666	-	2	novel transcript	chr8	100475667	100501148	1	q22.2	46.47	lncRNA	3331
Up	ENSG00000233621	LINC01137	-	2	long intergenic non-protein coding RNA 1137 [Source:HGNC Symbol;Acc:HGNC:49453]	chr1	37350934	37474411	-1	p34.3	47.83	lncRNA	3019
Up	ENSG00000257681	ENSG00000257681	-	2	novel transcript, antisense to STAB2	chr12	103746315	103768858	-1	q23.3	46.57	lncRNA	1063
Up	ENSG00000234476	LINC02765	-	2	long intergenic non-protein coding RNA 2765 [Source:HGNC Symbol;Acc:HGNC:54285]	chr1	225447233	225465400	-1	q42.12	49.9	lncRNA	2266
Up	ENSG00000257831	ENSG00000257831	-	2	novel transcript, antisense to HEATR5A	chr14	31248628	31302739	1	q12	42.73	lncRNA	975
Up	ENSG00000260317	ENSG00000260317	-	2	novel transcript	chr8	80541300	80543104	1	q21.13	32.35	lncRNA	1805
Up	ENSG00000237476	LINC01637	-	2	long intergenic non-protein coding RNA 1637 [Source:HGNC Symbol;Acc:HGNC:52424]	chr22	20957092	20964679	1	q11.21	55.28	lncRNA	684
Up	ENSG00000265625	ENSG00000265625	-	2	novel transcript, sense intronic to SSH2	chr17	29644796	29645847	-1	q11.2	39.73	lncRNA	1052
Up	ENSG00000274605	PCCA-DT	[292]	2	PCCA divergent transcript [Source:HGNC Symbol;Acc:HGNC:53266]	chr13	100053074	100088950	-1	q32.3	44.38	lncRNA	2077
Up	ENSG00000251526	LINC02435	-	2	long intergenic non-protein coding RNA 2435 [Source:HGNC Symbol;Acc:HGNC:53366]	chr4	123505279	123527525	1	q28.1	40.84	lncRNA	584
Up	ENSG00000249125	ENSG00000249125	-	2	novel transcript	chr4	123490242	123522106	1	q28.1	39.7	lncRNA	2108
Up	ENSG00000214049	UCA1	[34]	1	urothelial cancer associated 1 [Source:HGNC Symbol;Acc:HGNC:37126]	chr19	15828206	15836328	1	p13.12	48.16	lncRNA	4154
Up	ENSG00000285756	ENSG00000285756	-	1	novel transcript	chrX	3817528	3937855	-1	p22.33	47.21	lncRNA	16206
Up	ENSG00000231764	DLX6-AS1	[140]	1	DLX6 antisense RNA 1 [Source:HGNC Symbol;Acc:HGNC:37151]	chr7	96955141	97014088	-1	q21.3	42.6	lncRNA	16907
Up	ENSG00000232684	ATP11A-AS1	-	1	ATP11A antisense RNA 1 [Source:HGNC Symbol;Acc:HGNC:40645]	chr13	112745449	112754693	-1	q34	49.52	lncRNA	2192
Up	ENSG00000231119	ENSG00000231119	-	1	novel transcript, antisense to ZMYND8	chr20	47352561	47354633	1	q13.12	45.73	lncRNA	1809
Up	ENSG00000228812	LAMA5-AS1	-	1	LAMA5 antisense RNA 1 [Source:HGNC Symbol;Acc:HGNC:40334]	chr20	62352995	62356480	1	q13.33	65.92	lncRNA	843
Up	ENSG00000231971	CT69	-	1	cancer/testis associated transcript 69 [Source:HGNC Symbol;Acc:HGNC:37196]	chr6	134428239	134520585	-1	q23.2	39.6	lncRNA	3471
Up	ENSG00000253174	ENSG00000253174	-	1	novel transcript, antisense to GINS4	chr8	41540381	41545044	-1	p11.21	48.65	lncRNA	1189
Up	ENSG00000265933	LINC00668	-	1	long intergenic non-protein coding RNA 668 [Source:HGNC Symbol;Acc:HGNC:44328]	chr18	6919496	6929966	-1	p11.31	46.01	lncRNA	4866
Up	ENSG00000226328	NUP50-DT	-	1	NUP50 divergent transcript [Source:HGNC Symbol;Acc:HGNC:50502]	chr22	45133020	45163781	-1	q13.31	41.42	lncRNA	3141
Up	ENSG00000227028	SLC8A1-AS1	-	1	SLC8A1 antisense RNA 1 [Source:HGNC Symbol;Acc:HGNC:44102]	chr2	39786453	40255209	1	p22.1	38.74	lncRNA	8475
Up	ENSG00000253982	CLN8-AS1	-	1	novel transcript	chr8	1761054	1764508	-1	p23.3	60.43	lncRNA	2264
Up	ENSG00000236333	TRHDE-AS1	-	1	TRHDE antisense RNA 1 [Source:HGNC Symbol;Acc:HGNC:27471]	chr12	72249964	72276954	-1	q21.1	38.18	lncRNA	18092
Up	ENSG00000272894	MIOS-DT	-	1	MIOS divergent transcript [Source:HGNC Symbol;Acc:HGNC:55187]	chr7	7552462	7566996	-1	p21.3	41.47	lncRNA	1730
Up	ENSG00000235947	EGOT	-	1	eosinophil granule ontogeny transcript [Source:HGNC Symbol;Acc:HGNC:37129]	chr3	4749192	4751590	-1	p26.1	44.64	lncRNA	1464
Up	ENSG00000261305	ENSG00000261305	-	1	novel transcript, overlapping LRRC61	chr7	150337483	150343346	1	q36.1	59.67	lncRNA	1693
Up	ENSG00000233006	MIR3936HG	-	1	MIR3936 host gene [Source:HGNC Symbol;Acc:HGNC:40538]	chr5	132311285	132370170	-1	q31.1	43.74	lncRNA	4732
Up	ENSG00000248445	SEMA6A-AS1	-	1	SEMA6A antisense RNA 1 [Source:HGNC Symbol;Acc:HGNC:51110]	chr5	116447547	116508276	1	q23.1	39.5	lncRNA	2829
Up	ENSG00000225342	LRRK2-DT	-	1	LRRK2 divergent transcript [Source:HGNC Symbol;Acc:HGNC:40848]	chr12	40186009	40224915	-1	q12	36.31	lncRNA	2280
Up	ENSG00000180769	WDFY3-AS2	[188]	1	WDFY3 antisense RNA 2 [Source:HGNC Symbol;Acc:HGNC:21603]	chr4	84965534	85011277	1	q21.23	38.3	lncRNA	9357
Up	ENSG00000258521	ENSG00000258521	-	1	novel transcript, antisense to WARS	chr14	100339832	100340554	1	q32.2	52.42	lncRNA	552
Up	ENSG00000273368	ENSG00000273368	-	1	novel transcript, sense intronic to PTPRM	chr18	8154558	8155070	1	p11.23	29.63	lncRNA	513
Up	ENSG00000272243	ENSG00000272243	-	1	novel transcript	chr6	74530248	74734319	-1	q13	36.55	lncRNA	1479
Up	ENSG00000214922	HLA-F-AS1	[219]	1	HLA-F antisense RNA 1 [Source:HGNC Symbol;Acc:HGNC:26645]	chr6	29726601	29749049	-1	p22.1	45.94	lncRNA	4179
Up	ENSG00000233429	HOTAIRM1	[220]	1	HOXA transcript antisense RNA, myeloid-specific 1 [Source:HGNC Symbol;Acc:HGNC:37117]	chr7	27095647	27100265	1	p15.2	53.93	lncRNA	1496
Up	ENSG00000248810	LINC02432	-	1	long intergenic non-protein coding RNA 2432 [Source:HGNC Symbol;Acc:HGNC:53363]	chr4	141302910	141357096	-1	q31.21	38.71	lncRNA	7305
Up	ENSG00000249835	VCAN-AS1	-	1	VCAN antisense RNA 1 [Source:HGNC Symbol;Acc:HGNC:40163]	chr5	83531352	83581320	-1	q14.3	36.44	lncRNA	877
Up	ENSG00000235237	ENSG00000235237	-	1	novel transcript	chr22	37166757	37182850	1	q12.3	54.09	lncRNA	630
Up	ENSG00000267121	FMNL1-DT	-	1	FMNL1 divergent transcript [Source:HGNC Symbol;Acc:HGNC:55311]	chr17	45190931	45222222	-1	q21.31	48.52	lncRNA	3894
Up	ENSG00000232814	COL4A2-AS1	-	1	COL4A2 antisense RNA 1 [Source:HGNC Symbol;Acc:HGNC:40156]	chr13	110502575	110508179	-1	q34	56.32	lncRNA	540
Up	ENSG00000260244	ENSG00000260244	-	1	novel transcript, overlapping GUCY1A3	chr4	155734448	155737062	1	q32.1	34.57	lncRNA	2615
Up	ENSG00000263766	KPNB1-DT	-	1	KPNB1 divergent transcript [Source:HGNC Symbol;Acc:HGNC:55336]	chr17	47603860	47649420	-1	q21.32	43.3	lncRNA	1242
Up	ENSG00000163364	LINC01116	[267]	1	long intergenic non-protein coding RNA 1116 [Source:HGNC Symbol;Acc:HGNC:49259]	chr2	176629572	176637931	-1	q31.1	38.98	lncRNA	2126
Up	ENSG00000231890	DARS1-AS1	-	1	DARS1 antisense RNA 1 [Source:HGNC Symbol;Acc:HGNC:40170]	chr2	135985176	136022593	1	q21.3	42.51	lncRNA	6566
Up	ENSG00000204584	ENSG00000204584	-	1	novel transcript, antisense to TAC4	chr17	49845910	49848837	1	q21.33	51.71	lncRNA	2100
Up	ENSG00000265069	ENSG00000265069	-	1	novel transcript, antisense to LAMA1	chr18	6954677	6957419	1	p11.31	50.49	lncRNA	2295
Up	ENSG00000247095	MIR210HG	[274]	1	MIR210 host gene [Source:HGNC Symbol;Acc:HGNC:39524]	chr11	565660	568457	-1	p15.5	61.54	lncRNA	2321
Up	ENSG00000291230	ENSG00000291230	-	1	Novel transcript	chr19	50333796	50344806	-1			lncRNA
Up	ENSG00000254340	ENSG00000254340	-	1	novel transcript	chr8	9141424	9145503	1	p23.1	40.64	lncRNA	719
Up	ENSG00000224821	COL4A2-AS2	-	1	COL4A2 antisense 2 [Source:HGNC Symbol;Acc:HGNC:39849]	chr13	110456396	110463287	-1	q34	51.67	lncRNA	1522
Up	ENSG00000258908	ENSG00000258908	-	1	novel transcript	chr14	20474789	20477089	-1	q11.2	47.07	lncRNA	492
Up	ENSG00000273055	ENSG00000273055	-	1	novel transcript, antisense to LAMB1	chr7	107942116	107942740	1	q31.1	44.8	lncRNA	625
Up	ENSG00000276166	ENSG00000276166	-	1	novel transcript, antisense to KIFC3	chr16	57759358	57760024	1	q21	60.57	lncRNA	667
Up	ENSG00000269646	ENSG00000269646	-	1	novel transcript	chr19	52923382	52924075	1	q13.41	52.45	lncRNA	486
Up	ENSG00000245750	DRAIC	-	1	downregulated RNA in cancer, inhibitor of cell invasion and migration [Source:HGNC Symbol;Acc:HGNC:27082]	chr15	69462921	69843120	1	q23	46.45	lncRNA	31253
Up	ENSG00000225431	LINC01671	-	1	long intergenic non-protein coding RNA 1671 [Source:HGNC Symbol;Acc:HGNC:52459]	chr21	42599280	42615058	-1	q22.3	45.07	lncRNA	1775
Up	ENSG00000273328	ENSG00000273328	-	1	novel transcript	chr3	42809414	42908105	1	p22.1	44.31	lncRNA	3933
Up	ENSG00000261116	ENSG00000261116	-	1	novel transcript, overlapping to FAM83B	chr6	54943167	54945099	1	p12.1	32.9	lncRNA	1933
Up	ENSG00000180066	LINC02870	-	1	long intergenic non-protein coding RNA 2870 [Source:HGNC Symbol;Acc:HGNC:27275]	chr10	132444327	132449408	1	q26.3	64.88	lncRNA	2040
Up	ENSG00000180861	LINC01559	-	1	long intergenic non-protein coding RNA 1559 [Source:HGNC Symbol;Acc:HGNC:26598]	chr12	13371089	13387167	-1	p13.1	44.21	lncRNA	3953
Up	ENSG00000184068	SREBF2-AS1	-	1	SREBF2 antisense RNA 1 [Source:HGNC Symbol;Acc:HGNC:53953]	chr22	41831215	41834665	-1	q13.2	56.07	lncRNA	2989
Up	ENSG00000189223	PAX8-AS1	[293]	1	PAX8 antisense RNA 1 [Source:HGNC Symbol;Acc:HGNC:49271]	chr2	113211421	113276581	1	q14.1	49.01	lncRNA	22105
Up	ENSG00000203999	LINC01270	-	1	long intergenic non-protein coding RNA 1270 [Source:HGNC Symbol;Acc:HGNC:27658]	chr20	50292709	50315488	1	q13.13	52.54	lncRNA	5409
Up	ENSG00000204054	LINC00963	[294]	1	long intergenic non-protein coding RNA 963 [Source:HGNC Symbol;Acc:HGNC:48716]	chr9	129476946	129513687	1	q34.11	54.99	lncRNA	14066
Up	ENSG00000205559	CHKB-DT	-	1	CHKB divergent transcript [Source:HGNC Symbol;Acc:HGNC:40146]	chr22	50583026	50595634	1	q13.33	46.09	lncRNA	4154
Up	ENSG00000215481	BCRP3	-	1	BCR pseudogene 3 [Source:HGNC Symbol;Acc:HGNC:1016]	chr22	24632915	24650012	1	q11.23	51.73	lncRNA	1745
Up	ENSG00000223814	ENSG00000223814	-	1	novel transcript	chr1	47761132	47765547	-1	p33	52.4	lncRNA	407
Up	ENSG00000224099	ENSG00000224099	-	1	novel transcript	chr2	195448532	195481827	1	q32.3	37.76	lncRNA	2206
Up	ENSG00000224468	LAMC1-AS1	-	1	LAMC1 antisense RNA 1 [Source:HGNC Symbol;Acc:HGNC:52645]	chr1	183138402	183141282	-1	q25.3	38.84	lncRNA	479
Up	ENSG00000224817	ENSG00000224817	-	1	novel transcript	chr10	101701994	101730037	-1	q24.32	41.92	lncRNA	914
Up	ENSG00000225062	CATIP-AS1	-	1	CATIP antisense RNA 1 [Source:HGNC Symbol;Acc:HGNC:41080]	chr2	218366665	218367835	-1	q35	57.56	lncRNA	775
Up	ENSG00000226332	ENSG00000226332	-	1	novel transcript	chr20	62305432	62306325	-1	q13.33	60.63	lncRNA	681
Up	ENSG00000226453	LINC02542	-	1	long intergenic non-protein coding RNA 2542 [Source:HGNC Symbol;Acc:HGNC:53576]	chr6	81844602	82169391	-1	q14.1	38.02	lncRNA	2888
Up	ENSG00000226816	ENSG00000226816	-	1	novel transcript	chr7	23205787	23208045	1	p15.3	47.1	lncRNA	2259
Up	ENSG00000227230	ENSG00000227230	-	1	novel transcript	chr1	243135898	243140588	1	q43	35.81	lncRNA	694
Up	ENSG00000227338	ENSG00000227338	-	1	novel transcript	chr10	3263346	3267216	1	p15.2	44.51	lncRNA	1309
Up	ENSG00000227359	ENSG00000227359	-	1	novel transcript	chr2	113677702	113704078	-1	q14.1	39.92	lncRNA	561
Up	ENSG00000227492	ENSG00000227492	-	1	novel transcript	chr10	100229629	100234398	1	q24.31	44.49	lncRNA	1282
Up	ENSG00000227953	LINC01341	-	1	long intergenic non-protein coding RNA 1341 [Source:HGNC Symbol;Acc:HGNC:49457]	chr1	246775880	246792385	1	q44	52.3	lncRNA	4770
Up	ENSG00000228526	MIR34AHG	-	1	MIR34A host gene [Source:HGNC Symbol;Acc:HGNC:51913]	chr1	9148011	9198906	-1	p36.22	51.09	lncRNA	8702
Up	ENSG00000229452	CPVL-AS1	-	1	CPVL antisense RNA 1 [Source:HGNC Symbol;Acc:HGNC:40685]	chr7	29080284	29082527	1	p14.3	41.8	lncRNA	389
Up	ENSG00000229591	ENSG00000229591	-	1	novel transcript	chr7	152120001	152121717	-1	q36.1	43.97	lncRNA	673
Up	ENSG00000230532	ENSG00000230532	-	1	novel transcript	chr17	48931791	48937100	1	q21.32	46.2	lncRNA	483
Up	ENSG00000231056	LINC02522	-	1	long intergenic non-protein coding RNA 2522 [Source:HGNC Symbol;Acc:HGNC:53541]	chr6	10474500	10478502	-1	p24.3	47.96	lncRNA	256
Up	ENSG00000231194	FARP1-AS1	-	1	FARP1 antisense RNA 1 [Source:HGNC Symbol;Acc:HGNC:40229]	chr13	98435405	98435840	-1	q32.2	49.08	lncRNA	323
Up	ENSG00000231419	LINC00689	-	1	long intergenic non-protein coding RNA 689 [Source:HGNC Symbol;Acc:HGNC:27217]	chr7	159006522	159030195	1	q36.3	52.76	lncRNA	9158
Up	ENSG00000232034	ENSG00000232034	-	1	novel transcript	chr2	100822661	100847220	1	q11.2	43.86	lncRNA	717
Up	ENSG00000232085	ENSG00000232085	-	1	novel transcript, antisense to CEP170	chr1	243164638	243169445	1	q43	32.97	lncRNA	488
Up	ENSG00000232110	ENSG00000232110	-	1	novel transcript, antisense to LIPA	chr10	89283636	89292125	1	q23.31	44.94	lncRNA	2907
Up	ENSG00000232295	ENSG00000232295	-	1	novel transcript, antisense OGFRL1	chr6	71221457	71328228	-1	q13	38.46	lncRNA	5169
Up	ENSG00000232310	ENSG00000232310	-	1	novel transcript	chr6	134520163	134689399	-1	q23.2	39.56	lncRNA	4548
Up	ENSG00000232352	SEMA3B-AS1	[295]	1	SEMA3B antisense RNA 1 (head to head) [Source:HGNC Symbol;Acc:HGNC:49096]	chr3	50266641	50267371	-1	p21.31	59.37	lncRNA	338
Up	ENSG00000232536	ENSG00000232536	-	1	novel transcript	chr1	151540516	151561855	1	q21.3	45.61	lncRNA	526
Up	ENSG00000233339	ENSG00000233339	-	1	novel transcript	chr2	106179542	106183797	1	q12.2	42.69	lncRNA	433
Up	ENSG00000233515	LINC01518	-	1	long intergenic non-protein coding RNA 1518 [Source:HGNC Symbol;Acc:HGNC:51216]	chr10	42644445	42691723	-1	q11.21	41.35	lncRNA	2498
Up	ENSG00000233517	ENSG00000233517	-	1	novel transcript	chr7	28987028	28988899	1	p14.3	42.52	lncRNA	578
Up	ENSG00000234350	ENSG00000234350	-	1	novel transcript (FLJ13453)	chr2	170700368	170813670	-1	q31.1	41.71	lncRNA	6794
Up	ENSG00000234626	ENSG00000234626	-	1	novel transcript	chr22	32327064	32343105	-1	q12.3	52.43	lncRNA	687
Up	ENSG00000234650	PCCA-AS1	-	1	PCCA antisense RNA 1 [Source:HGNC Symbol;Acc:HGNC:39901]	chr13	100464440	100481205	-1	q32.3	43.39	lncRNA	995
Up	ENSG00000235033	DAAM2-AS1	-	1	DAAM2 antisense RNA 1 [Source:HGNC Symbol;Acc:HGNC:40830]	chr6	39881804	39900071	-1	p21.2	48.1	lncRNA	6854
Up	ENSG00000235142	LINC02532	[296]	1	long intergenic non-protein coding RNA 2532 [Source:HGNC Symbol;Acc:HGNC:53549]	chr6	106705334	106788148	-1	q21	42.96	lncRNA	13941
Up	ENSG00000235523	ENSG00000235523	-	1	novel transcript	chr9	72257336	72257783	1	q21.13	44.87	lncRNA	361
Up	ENSG00000236389	ENSG00000236389	-	1	novel transcript	chr6	134706060	134707349	-1	q23.3	40.23	lncRNA	929
Up	ENSG00000236501	ENSG00000236501	-	1	novel transcript	chr2	176989418	177164656	-1	q31.2	39.31	lncRNA	6843
Up	ENSG00000236528	ENSG00000236528	-	1	novel transcript	chr1	25859613	25863420	1	p36.11	50.6	lncRNA	849
Up	ENSG00000236700	LINC01010	-	1	long intergenic non-protein coding RNA 1010 [Source:HGNC Symbol;Acc:HGNC:48978]	chr6	134343307	134504581	1	q23.2	40.53	lncRNA	4418
Up	ENSG00000236753	MKLN1-AS	-	1	MKLN1 antisense RNA [Source:HGNC Symbol;Acc:HGNC:40374]	chr7	131309469	131328312	-1	q32.3	41.94	lncRNA	8638
Up	ENSG00000236830	CBR3-AS1	-	1	CBR3 antisense RNA 1 [Source:HGNC Symbol;Acc:HGNC:43664]	chr21	36131767	36175815	-1	q22.12	47.9	lncRNA	8897
Up	ENSG00000236882	LINC01554	[297]	1	long intergenic non-protein coding RNA 1554 [Source:HGNC Symbol;Acc:HGNC:24687]	chr5	95838245	95860133	1	q15	46.16	lncRNA	2260
Up	ENSG00000237133	RASGRP3-AS1	-	1	RASGRP3 antisense RNA 1 [Source:HGNC Symbol;Acc:HGNC:40689]	chr2	33555047	33563547	-1	p22.3	42.58	lncRNA	338
Up	ENSG00000240240	ENSG00000240240	-	1	novel transcript	chr9	40223402	40329221	1	p11.2	40.91	lncRNA	6084
Up	ENSG00000241832	CECR3	-	1	cat eye syndrome chromosome region, candidate 3 [Source:HGNC Symbol;Acc:HGNC:1841]	chr22	17256859	17266733	-1	q11.1	51.67	lncRNA	1915
Up	ENSG00000243885	ENSG00000243885	-	1	novel transcript	chr3	149384179	149385800	-1	q25.1	44.33	lncRNA	1001
Up	ENSG00000244198	ARHGEF35-AS1	-	1	ARHGEF35 antisense RNA 1 [Source:HGNC Symbol;Acc:HGNC:41292]	chr7	144194858	144280547	1	q35	41.15	lncRNA	9504
Up	ENSG00000244300	GATA2-AS1	-	1	GATA2 antisense RNA 1 [Source:HGNC Symbol;Acc:HGNC:51108]	chr3	128489212	128502970	1	q21.3	55.16	lncRNA	2905
Up	ENSG00000246640	PICART1	-	1	p53 inducible cancer associated RNA transcript 1 [Source:HGNC Symbol;Acc:HGNC:27576]	chr17	50050349	50055739	-1	q21.33	51.18	lncRNA	2533
Up	ENSG00000249007	ENSG00000249007	-	1	novel transcript	chr1	202011370	202015657	1	q32.1	57.42	lncRNA	987
Up	ENSG00000249790	ENSG00000249790	-	1	novel transcript	chr12	8788253	8795789	1	p13.31	49.91	lncRNA	2283
Up	ENSG00000249901	ENSG00000249901	-	1	novel transcript	chr4	158490766	158509908	-1	q32.1	36.18	lncRNA	659
Up	ENSG00000250186	ENSG00000250186	-	1	novel transcript, antisense to PHB	chr17	49404081	49405197	1	q21.33	54.79	lncRNA	963
Up	ENSG00000250295	RDH10-AS1	-	1	RDH10 antisense RNA 1 [Source:HGNC Symbol;Acc:HGNC:51658]	chr8	73297711	73356461	-1	q21.11	42.57	lncRNA	3801
Up	ENSG00000251003	ZFPM2-AS1	-	1	ZFPM2 antisense RNA 1 [Source:HGNC Symbol;Acc:HGNC:50698]	chr8	105546089	106060524	-1	q23.1	36.31	lncRNA	2668
Up	ENSG00000251224	CNOT10-AS1	-	1	CNOT10 antisense RNA 1 [Source:HGNC Symbol;Acc:HGNC:41031]	chr3	32730635	32737454	-1	p22.3	39.06	lncRNA	466
Up	ENSG00000251260	WDFY3-AS1	-	1	WDFY3 antisense RNA 1 [Source:HGNC Symbol;Acc:HGNC:40935]	chr4	84796614	84810403	1	q21.23	35.45	lncRNA	644
Up	ENSG00000251396	LINC01301	-	1	long intergenic non-protein coding RNA 1301 [Source:HGNC Symbol;Acc:HGNC:50464]	chr8	60289928	60516795	-1	q12.1	41.09	lncRNA	9858
Up	ENSG00000251675	ENSG00000251675	-	1	novel transcript	chr5	80128361	80143883	1	q14.1	43.51	lncRNA	664
Up	ENSG00000253301	LINC01606	-	1	long intergenic non-protein coding RNA 1606 [Source:HGNC Symbol;Acc:HGNC:51656]	chr8	57142659	57244793	1	q12.1	41.93	lncRNA	8840
Up	ENSG00000254019	ENSG00000254019	-	1	novel transcript, antisense to SLC45A4	chr8	141254565	141256817	1	q24.3	49.31	lncRNA	584
Up	ENSG00000254197	ENSG00000254197	-	1	novel transcript	chr8	141278228	141292862	1	q24.3	55.5	lncRNA	294
Up	ENSG00000254317	ENSG00000254317	-	1	novel transcript	chr8	129832301	129844504	1	q24.21	42.33	lncRNA	917
Up	ENSG00000254528	ENSG00000254528	-	1	novel transcript, antisense to FXYD6	chr11	117833719	117838942	1	q23.3	51.57	lncRNA	1464
Up	ENSG00000254844	ENSG00000254844	-	1	novel transcript, antisense to FXYD2	chr11	117818443	117821992	1	q23.3	55.92	lncRNA	557
Up	ENSG00000255201	ENSG00000255201	-	1	novel transcript	chr8	38421889	38426096	1	p11.23	50.78	lncRNA	534
Up	ENSG00000255629	ENSG00000255629	-	1	novel transcript	chr12	64146388	64147857	-1	q14.2	44.56	lncRNA	462
Up	ENSG00000255692	ENSG00000255692	-	1	novel transcript, antisense to CIT	chr12	119699768	119701011	1	q24.23	47.91	lncRNA	451
Up	ENSG00000255867	DENND5B-AS1	-	1	DENND5B antisense RNA 1 [Source:HGNC Symbol;Acc:HGNC:42517]	chr12	31589923	31615666	1	p11.21	43.72	lncRNA	1308
Up	ENSG00000255958	GABARAPL1-AS1	-	1	GABARAPL1 antisense RNA 1 [Source:HGNC Symbol;Acc:HGNC:54822]	chr12	10214161	10214761	-1	p13.2	38.1	lncRNA	329
Up	ENSG00000256092	SBNO1-AS1	-	1	SBNO1 antisense RNA 1 [Source:HGNC Symbol;Acc:HGNC:54355]	chr12	123363868	123366113	1	q24.31	59.97	lncRNA	2246
Up	ENSG00000256325	ENSG00000256325	-	1	novel transcript	chr12	68828118	68828553	1	q15	37.61	lncRNA	374
Up	ENSG00000256661	A2ML1-AS1	-	1	A2ML1 antisense RNA 1 [Source:HGNC Symbol;Acc:HGNC:41022]	chr12	8776219	8830947	-1	p13.31	44.16	lncRNA	452
Up	ENSG00000257410	ENSG00000257410	-	1	novel transcript	chr12	71793855	71799627	-1	q21.1	36.77	lncRNA	1431
Up	ENSG00000257989	ENSG00000257989	-	1	novel transcript	chr12	52092485	52104297	-1	q13.13	44.54	lncRNA	512
Up	ENSG00000258086	ENSG00000258086	-	1	novel transcript, antisense to ZNF385A, GPR84, ITGA5 and GTSF1	chr12	54353792	54466985	1	q13.13	48.84	lncRNA	546
Up	ENSG00000258232	ENSG00000258232	-	1	novel transcript, antisense to TUBA1C	chr12	49265156	49273306	-1	q13.12	48.46	lncRNA	680
Up	ENSG00000258376	ENSG00000258376	-	1	novel transcript, antisense to PAPLN	chr14	73242651	73245979	-1	q24.2	54.4	lncRNA	3050
Up	ENSG00000258512	LINC00239	[298]	1	long intergenic non-protein coding RNA 239 [Source:HGNC Symbol;Acc:HGNC:20119]	chr14	101730437	101732522	1	q32.31	50.81	lncRNA	639
Up	ENSG00000258586	LINC02274	-	1	long intergenic non-protein coding RNA 2274 [Source:HGNC Symbol;Acc:HGNC:53190]	chr14	73822559	73830135	-1	q24.3	42.26	lncRNA	1174
Up	ENSG00000258666	ENSG00000258666	-	1	novel transcript, antisense to WARS	chr14	100333790	100354061	1	q32.2	50.67	lncRNA	385
Up	ENSG00000258667	HIF1A-AS3	-	1	HIF1A antisense RNA 3 [Source:HGNC Symbol;Acc:HGNC:54284]	chr14	61707564	61751099	-1	q23.2	37.03	lncRNA	1852
Up	ENSG00000258944	ENSG00000258944	-	1	novel transcript, antisense to PAPLN	chr14	73272182	73274081	-1	q24.2	47.74	lncRNA	777
Up	ENSG00000259006	ENSG00000259006	-	1	novel transcript, antisense to MC1R	chr16	89919827	89922662	-1	q24.3	61.18	lncRNA	985
Up	ENSG00000259250	ENSG00000259250	-	1	novel transcript, antisense to ADAM10	chr15	58587507	58591676	1	q21.3	39.16	lncRNA	542
Up	ENSG00000259590	LINC02244	-	1	long intergenic non-protein coding RNA 2244 [Source:HGNC Symbol;Acc:HGNC:53929]	chr15	99395179	99396593	-1	q26.3	34.2	lncRNA	323
Up	ENSG00000259760	ENSG00000259760	-	1	novel transcript, antisense to LRRC28	chr15	99396613	99401315	-1	q26.3	41.74	lncRNA	198
Up	ENSG00000259933	ENSG00000259933	-	1	novel transcript, overlapping TSC2	chr16	2091436	2095433	1	p13.3	62.98	lncRNA	691
Up	ENSG00000260064	ENSG00000260064	-	1	novel transcript, sense intronic to CDYL2	chr16	80627551	80628379	-1	q23.2	41.38	lncRNA	829
Up	ENSG00000260101	ENSG00000260101	-	1	novel transcript	chr2	64522187	64524093	-1	p14	37.49	lncRNA	1907
Up	ENSG00000260594	ENSG00000260594	-	1	novel transcript, antisense to CDYL2	chr16	80736360	80742305	1	q23.2	39.22	lncRNA	452
Up	ENSG00000260896	ARLNC1	-	1	androgen receptor regulated long noncoding RNA 1 [Source:HGNC Symbol;Acc:HGNC:53032]	chr16	80826074	80892682	-1	q23.2	38.7	lncRNA	6718
Up	ENSG00000261238	ENSG00000261238	-	1	novel transcript, antisense to SALL1	chr16	51149239	51149819	1	q12.1	50.95	lncRNA	487
Up	ENSG00000261411	ENSG00000261411	-	1	novel transcript	chr20	11685144	11687323	-1	p12.2	47.57	lncRNA	2180
Up	ENSG00000261542	ENSG00000261542	-	1	novel transcript	chr8	63215981	63218034	1	q12.3	32.38	lncRNA	2054
Up	ENSG00000261586	ENSG00000261586	-	1	novel transcript	chr12	51817899	51820150	1	q13.13	55.95	lncRNA	2094
Up	ENSG00000261596	ENSG00000261596	-	1	novel transcript, sense intronic to METTL9	chr16	21626742	21627569	1	p12.2	39.37	lncRNA	828
Up	ENSG00000262198	ENSG00000262198	-	1	novel transcript	chr13	22918591	22924602	1	q12.12	37.82	lncRNA	585
Up	ENSG00000262837	ENSG00000262837	-	1	novel transcript	chr17	49834239	49836454	1	q21.33	47.97	lncRNA	416
Up	ENSG00000263069	RNF213-AS1	-	1	RNF213 antisense RNA 1 [Source:HGNC Symbol;Acc:HGNC:54402]	chr17	80351828	80415168	-1	q25.3	48.14	lncRNA	6584
Up	ENSG00000263293	EFCAB13-DT	-	1	EFCAB13 divergent transcript [Source:HGNC Symbol;Acc:HGNC:55338]	chr17	47303460	47323613	-1	q21.32	42.9	lncRNA	713
Up	ENSG00000263370	ENSG00000263370	-	1	novel transcript, antisense to SSH2	chr17	29639627	29640825	1	q11.2	47.37	lncRNA	270
Up	ENSG00000263477	ENSG00000263477	-	1	novel transcript, antisense to SSH2	chr17	29863402	29866092	1	q11.2	39.17	lncRNA	893
Up	ENSG00000263711	LINC02864	-	1	long intergenic non-protein coding RNA 2864 [Source:HGNC Symbol;Acc:HGNC:54480]	chr18	73151241	73264480	-1	q22.3	35.59	lncRNA	9518
Up	ENSG00000263786	ENSG00000263786	-	1	novel transcript, sense intronic to HN1	chr17	75145261	75146546	-1	q25.1	44.17	lncRNA	717
Up	ENSG00000264558	ENSG00000264558	-	1	novel transcript, antisense to KPNB1	chr17	47682417	47682683	-1	q21.32	46.44	lncRNA	267
Up	ENSG00000264578	ENSG00000264578	-	1	novel transcript, antisense to AGPAT6	chr8	41609692	41621502	-1	p11.21	48.48	lncRNA	729
Up	ENSG00000266401	ENSG00000266401	-	1	novel transcript, antisense to DLGAP1	chr18	3653030	3656282	1	p11.31	43.53	lncRNA	1761
Up	ENSG00000266402	SNHG25	[299]	1	small nucleolar RNA host gene 25 [Source:HGNC Symbol;Acc:HGNC:51534]	chr17	64145970	64146476	1	q23.3	63.71	lncRNA	278
Up	ENSG00000266598	ENSG00000266598	-	1	novel transcript, antisense to GNA13	chr17	65051909	65053308	1	q24.1	41.5	lncRNA	537
Up	ENSG00000266642	ENSG00000266642	-	1	novel transcript, antisense to DHRS13	chr17	28897738	28899402	1	q11.2	53.15	lncRNA	1264
Up	ENSG00000266872	ENSG00000266872	-	1	novel transcript, antisense to KSR1	chr17	27625484	27626438	-1	q11.2	50.58	lncRNA	656
Up	ENSG00000267080	ASB16-AS1	-	1	ASB16 antisense RNA 1 [Source:HGNC Symbol;Acc:HGNC:25442]	chr17	44175968	44186723	-1	q21.31	56.18	lncRNA	3659
Up	ENSG00000267159	ENSG00000267159	-	1	novel transcript, antisense to ARID3A	chr19	928259	928817	-1	p13.3	61	lncRNA	328
Up	ENSG00000267383	ENSG00000267383	-	1	novel transcript, antisense to ZNF486 and ZNF90	chr19	20122569	20321305	-1	p12	41.15	lncRNA	7757
Up	ENSG00000267436	ENSG00000267436	-	1	novel transcript, antisense to MFSD12	chr19	3544199	3557569	1	p13.3	60.24	lncRNA	565
Up	ENSG00000267461	ENSG00000267461	-	1	novel transcript	chr17	68557516	68582577	1	q24.2	42.93	lncRNA	384
Up	ENSG00000267659	LINC01482	-	1	long intergenic non-protein coding RNA 1482 [Source:HGNC Symbol;Acc:HGNC:51128]	chr17	68591796	68763882	1	q24.2	41.29	lncRNA	3686
Up	ENSG00000268292	ENSG00000268292	-	1	novel transcript, antisense to C22orf25	chr22	20064552	20065705	-1	q11.21	55.11	lncRNA	583
Up	ENSG00000269082	ENSG00000269082	-	1	novel transcript	chr19	52956041	52981654	-1	q13.41	44.76	lncRNA	553
Up	ENSG00000269898	ENSG00000269898	-	1	novel transcript, antisense to C16orf74	chr16	85743287	85744225	1	q24.1	50.8	lncRNA	498
Up	ENSG00000269972	ENSG00000269972	-	1	novel transcript	chr22	30977516	30977858	-1	q12.2	42.57	lncRNA	264
Up	ENSG00000270127	ENSG00000270127	-	1	novel transcript	chr15	100547765	100550153	-1	q26.3	43.2	lncRNA	2389
Up	ENSG00000271787	ENSG00000271787	-	1	novel transcript, antisense to KLF11	chr2	10054421	10054866	-1	p25.1	39.24	lncRNA	446
Up	ENSG00000272449	ENSG00000272449	-	1	novel transcript	chr1	2530064	2547460	1	p36.32	63.15	lncRNA	1531
Up	ENSG00000272703	ENSG00000272703	-	1	novel transcript	chr18	11857155	11857554	-1	p11.21	45	lncRNA	400
Up	ENSG00000272752	STAG3L5P-PVRIG2P-PILRB	-	1	STAG3L5P-PVRIG2P-PILRB readthrough [Source:HGNC Symbol;Acc:HGNC:48898]	chr7	100336104	100367831	1	q22.1	50.38	lncRNA	3816
Up	ENSG00000273032	DGCR5	[300]	1	DiGeorge syndrome critical region gene 5 [Source:NCBI gene (formerly Entrezgene);Acc:26220]	chr22	18970439	19031242	1	q11.21	50.24	lncRNA	12964
Up	ENSG00000273192	ENSG00000273192	-	1	novel transcript, antisense to ALG12	chr22	49902228	49904576	1	q13.33	55.51	lncRNA	2349
Up	ENSG00000273243	ENSG00000273243	-	1	novel transcript	chr22	45155539	45156011	-1	q13.31	43.97	lncRNA	473
Up	ENSG00000273272	ENSG00000273272	-	1	novel transcript	chr22	50541108	50543011	1	q13.33	46.17	lncRNA	794
Up	ENSG00000273311	DGCR11	-	1	DiGeorge syndrome critical region gene 11 [Source:HGNC Symbol;Acc:HGNC:17226]	chr22	19046162	19048375	-1	q11.21	49.01	lncRNA	2214
Up	ENSG00000273445	ENSG00000273445	-	1	novel transcript	chr2	87477495	87478034	-1	p11.2	43.89	lncRNA	540
Up	ENSG00000273576	ENSG00000273576	-	1	novel transcript	chr17	39566915	39567559	1	q12	46.67	lncRNA	645
Up	ENSG00000275185	ENSG00000275185	-	1	novel transcript, antisense to TEFM	chr17	30899110	30899651	1	q11.2	37.27	lncRNA	542
Up	ENSG00000275393	ENSG00000275393	-	1	novel transcript, sense intronic to C16orf74	chr16	85697335	85697868	-1	q24.1	48.5	lncRNA	534
Up	ENSG00000276740	ENSG00000276740	-	1	novel transcript, sense intronic to FAM155A	chr13	107465984	107466674	-1	q33.3	44.14	lncRNA	691
Up	ENSG00000276863	ENSG00000276863	-	1	novel transcript, antisense to RNF213	chr17	80333841	80334366	-1	q25.3	50.76	lncRNA	526
Up	ENSG00000277463	ENSG00000277463	-	1	novel transcript	chr17	62626031	62626453	1	q23.2	49.41	lncRNA	423
Up	ENSG00000277501	ENSG00000277501	-	1	novel transcript, antisense DDX52	chr17	37642947	37684252	1	q12	42.44	lncRNA	1095
Up	ENSG00000277589	ENSG00000277589	-	1	novel transcript, sense intronic AATF	chr17	36998598	37000034	1	q12	39.81	lncRNA	710
Up	ENSG00000277688	ENSG00000277688	-	1	novel transcript, antisense DDX52	chr17	37609739	37613841	1	q12	39.22	lncRNA	508
Up	ENSG00000278231	ENSG00000278231	-	1	novel transcript	chr20	48821688	48849458	-1	q13.13	47.64	lncRNA	366
Up	ENSG00000279932	ENSG00000279932	-	1	novel transcript, sense intronic SLC7A2	chr8	17510613	17511300	1	p22	42.3	lncRNA	688
Up	ENSG00000279949	ENSG00000279949	-	1	novel transcript	chr8	9158063	9158621	1	p23.1	38.82	lncRNA	559
Up	ENSG00000283646	LINC02009	-	1	long intergenic non-protein coding RNA 2009 [Source:HGNC Symbol;Acc:HGNC:52845]	chr3	46416524	46423591	-1	p21.31	50.42	lncRNA	2951
Up	ENSG00000290425	PI4KAP1	-	1	Phosphatidylinositol 4-kinase alpha pseudogene 1	chr22	18533646	18577968	-1			lncRNA
Up	ENSG00000290733	ENSG00000290733	-	1	Novel transcript	chr2	110402914	110435166	-1			lncRNA
Up	ENSG00000291137	GBAP1	-	1	Glucosylceramidase beta pseudogene 1	chr1	155213821	155227574	-1			lncRNA
Down	ENSG00000237943	PRKCQ-AS1	[146]	2	PRKCQ antisense RNA 1 [Source:HGNC Symbol;Acc:HGNC:44689]	chr10	6580419	6616921	1	p15.1	40.55	lncRNA	5834
Down	ENSG00000227733	ENSG00000227733	-	2	novel transcript	chr1	148159213	148255012	-1	q21.2	40.81	lncRNA	16052
Down	ENSG00000206337	HCP5	[213]	2	HLA complex P5 [Source:HGNC Symbol;Acc:HGNC:21659]	chr6	31463170	31478936	1	p21.33	49.39	lncRNA	11058
Down	ENSG00000255135	ENSG00000255135	-	2	novel transcript	chr11	76435559	76444687	-1	q13.5	43.4	lncRNA	1056
Down	ENSG00000183242	WT1-AS	[260]	2	WT1 antisense RNA [Source:HGNC Symbol;Acc:HGNC:18135]	chr11	32435518	32458769	1	p13	44.72	lncRNA	5561
Down	ENSG00000152931	PART1	[18]	2	prostate androgen-regulated transcript 1 [Source:HGNC Symbol;Acc:HGNC:17263]	chr5	60487713	60548813	1	q12.1	39.96	lncRNA	12703
Down	ENSG00000273344	PAXIP1-DT	-	2	PAXIP1 divergent transcript [Source:HGNC Symbol;Acc:HGNC:27328]	chr7	155003448	155005703	1	q36.2	48.32	lncRNA	2256
Down	ENSG00000229847	EMX2OS	[285]	2	EMX2 opposite strand/antisense RNA [Source:HGNC Symbol;Acc:HGNC:18511]	chr10	117473215	117545068	-1	q26.11	47.72	lncRNA	8918
Down	ENSG00000166770	ZNF667-AS1	[286]	2	ZNF667 antisense RNA 1 (head to head) [Source:HGNC Symbol;Acc:HGNC:44321]	chr19	56477250	56504362	1	q13.43	43.23	lncRNA	12170
Down	ENSG00000215808	LINC01139	[12]	2	long intergenic non-protein coding RNA 1139 [Source:HGNC Symbol;Acc:HGNC:27924]	chr1	238476542	238486060	-1	q43	38.21	lncRNA	5965
Down	ENSG00000227954	TARID	[301]	2	TCF21 antisense RNA inducing promoter demethylation [Source:HGNC Symbol;Acc:HGNC:50506]	chr6	133502252	133892802	-1	q23.2	38.09	lncRNA	8082
Down	ENSG00000235560	ENSG00000235560	-	2	novel transcript, antisense to ZNF747	chr16	30534752	30537149	1	p11.2	49.79	lncRNA	1832
Down	ENSG00000254560	BBOX1-AS1	[35]	1	BBOX1 antisense RNA 1 [Source:HGNC Symbol;Acc:HGNC:50700]	chr11	27047186	27220113	-1	p14.1	38.93	lncRNA	1343
Down	ENSG00000261183	SPINT1-AS1	-	1	SPINT1 antisense RNA 1 [Source:HGNC Symbol;Acc:HGNC:53162]	chr15	40835808	40844387	-1	q15.1	47.75	lncRNA	1239
Down	ENSG00000146521	LINC01558	[153]	1	long intergenic non-protein coding RNA 1558 [Source:HGNC Symbol;Acc:HGNC:21235]	chr6	167784537	167796872	-1	q27	47.35	lncRNA	2780
Down	ENSG00000234807	LINC01135	[165]	1	long intergenic non-protein coding RNA 1135 [Source:HGNC Symbol;Acc:HGNC:49450]	chr1	58785128	58901109	1	p32.1	43.07	lncRNA	5017
Down	ENSG00000260231	KDM7A-DT	-	1	KDM7A divergent transcript [Source:HGNC Symbol;Acc:HGNC:48959]	chr7	140177184	140179640	1	q34	50.47	lncRNA	2457
Down	ENSG00000272142	LYRM4-AS1	-	1	LYRM4 antisense RNA 1 [Source:NCBI gene (formerly Entrezgene);Acc:100129461]	chr6	5003774	5045666	1	p25.1	45.44	lncRNA	4662
Down	ENSG00000238113	LINC01410	-	1	long intergenic non-protein coding RNA 1410 [Source:HGNC Symbol;Acc:HGNC:50702]	chr9	62801461	62813486	1	q13	40.99	lncRNA	4123
Down	ENSG00000253716	MINCR	-	1	MYC-induced long non-coding RNA [Source:HGNC Symbol;Acc:HGNC:51653]	chr8	143280161	143281690	-1	q24.3	49.93	lncRNA	1530
Down	ENSG00000282851	BISPR	-	1	BST2 interferon stimulated positive regulator [Source:HGNC Symbol;Acc:HGNC:51290]	chr19	17405686	17419324	1	p13.11	47.97	lncRNA	3045
Down	ENSG00000234694	ENSG00000234694	-	1	novel transcript	chr1	43354684	43358658	-1	p34.2	47.42	lncRNA	661
Down	ENSG00000268204	ENSG00000268204	-	1	novel transcript, antisense to STXBP2	chr19	7633766	7636990	-1	p13.2	54.14	lncRNA	843
Down	ENSG00000269155	ENSG00000269155	-	1	novel transcript	chr6	167795530	167798248	1	q27	58.15	lncRNA	2719
Down	ENSG00000246523	FZD4-DT	-	1	FZD4 divergent transcript [Source:HGNC Symbol;Acc:HGNC:54219]	chr11	86955616	87021909	1	q14.2	41.87	lncRNA	1988
Down	ENSG00000235590	GNAS-AS1	-	1	GNAS antisense RNA 1 [Source:HGNC Symbol;Acc:HGNC:24872]	chr20	58818919	58850903	-1	q13.32	49.03	lncRNA	3657
Down	ENSG00000224184	MIR3681HG	-	1	MIR3681 host gene [Source:HGNC Symbol;Acc:HGNC:52001]	chr2	11833926	12702913	1	p25.1	40.98	lncRNA	8444
Down	ENSG00000237013	LINC01812	[107]	1	long intergenic non-protein coding RNA 1812 [Source:HGNC Symbol;Acc:HGNC:52616]	chr2	67796054	67825562	-1	p14	38.51	lncRNA	725
Down	ENSG00000250786	SNHG18	-	1	small nucleolar RNA host gene 18 [Source:HGNC Symbol;Acc:HGNC:49007]	chr5	9546200	9550609	1	p15.31	46.64	lncRNA	1951
Down	ENSG00000248429	FAM198B-AS1	-	1	FAM198B antisense RNA 1 [Source:HGNC Symbol;Acc:HGNC:53132]	chr4	158170752	158202877	1	q32.1	38.86	lncRNA	5639
Down	ENSG00000261167	ENSG00000261167	-	1	novel transcript, overlapping to MRPL3	chr3	131455126	131458598	-1	q22.1	39.27	lncRNA	3473
Down	ENSG00000232931	LINC00342	-	1	long intergenic non-protein coding RNA 342 [Source:HGNC Symbol;Acc:HGNC:42470]	chr2	95807052	95835003	-1	q11.1	43.14	lncRNA	8599
Down	ENSG00000243069	ARHGEF26-AS1	-	1	ARHGEF26 antisense RNA 1 [Source:HGNC Symbol;Acc:HGNC:41048]	chr3	154024401	154121347	-1	q25.2	38	lncRNA	9000
Down	ENSG00000125804	FAM182A	-	1	family with sequence similarity 182 member A [Source:HGNC Symbol;Acc:HGNC:16222]	chr20	25985210	26086917	1	p11.1	45.7	lncRNA	10282
Down	ENSG00000229901	FOXO6-AS1	-	1	FOXO6 antisense RNA 1 [Source:HGNC Symbol;Acc:HGNC:41066]	chr1	41375004	41375669	-1	p34.2	47.6	lncRNA	394
Down	ENSG00000234336	JAZF1-AS1	-	1	JAZF1 antisense RNA 1 [Source:HGNC Symbol;Acc:HGNC:41218]	chr7	28180322	28243917	1	p15.1	41.04	lncRNA	4244
Down	ENSG00000228139	LINC01402	-	1	long intergenic non-protein coding RNA 1402 [Source:HGNC Symbol;Acc:HGNC:50685]	chrX	120117642	120119700	-1	q24	41.23	lncRNA	279
Down	ENSG00000251141	MRPS30-DT	-	1	MRPS30 divergent transcript [Source:HGNC Symbol;Acc:HGNC:53420]	chr5	44742420	44808777	-1	p12	36.49	lncRNA	4749
Down	ENSG00000255471	ENSG00000255471	-	1	novel transcript	chr11	86892214	86925037	-1	q14.2	40.89	lncRNA	1218
Down	ENSG00000251450	RASGRF2-AS1	-	1	RASGRF2 antisense RNA 1 [Source:HGNC Symbol;Acc:HGNC:40499]	chr5	80947694	80960907	-1	q14.1	44.98	lncRNA	3816
Down	ENSG00000272870	SAP30-DT	-	1	SAP30 divergent transcript [Source:HGNC Symbol;Acc:HGNC:54424]	chr4	173349543	173370721	-1	q34.1	38.32	lncRNA	9066
Down	ENSG00000243004	ENSG00000243004	-	1	novel transcript, sense overlapping to MACC1	chr7	19918981	20140453	-1	p21.1	36.82	lncRNA	3109
Down	ENSG00000259343	TMC3-AS1	-	1	TMC3 antisense RNA 1 [Source:HGNC Symbol;Acc:HGNC:51424]	chr15	81324338	81518200	1	q25.1	39.57	lncRNA	14159
Down	ENSG00000255248	MIR100HG	-	1	mir-100-let-7a-2-mir-125b-1 cluster host gene [Source:HGNC Symbol;Acc:HGNC:39522]	chr11	122028325	122556721	-1	q24.1	39.21	lncRNA	28649
Down	ENSG00000278175	GLIDR	-	1	glioblastoma down-regulated RNA [Source:HGNC Symbol;Acc:HGNC:48823]	chr9	39748514	39810097	-1	p12	40.28	lncRNA	6628
Down	ENSG00000240875	LINC00886	[187]	1	long intergenic non-protein coding RNA 886 [Source:HGNC Symbol;Acc:HGNC:48572]	chr3	156747343	156817062	-1	q25.31	39.71	lncRNA	3961
Down	ENSG00000235531	MSC-AS1	[184]	1	MSC antisense RNA 1 [Source:HGNC Symbol;Acc:HGNC:48724]	chr8	71828167	72118393	1	q13.3	37.87	lncRNA	11501
Down	ENSG00000237125	HAND2-AS1	[42]	1	HAND2 antisense RNA 1 [Source:HGNC Symbol;Acc:HGNC:48872]	chr4	173527270	173659696	1	q34.1	39.48	lncRNA	21212
Down	ENSG00000243701	DUBR	[185]	1	DPPA2 upstream binding RNA [Source:HGNC Symbol;Acc:HGNC:48569]	chr3	107220744	107348464	1	q13.12	38.76	lncRNA	15322
Down	ENSG00000226237	GAS1RR	[190]	1	GAS1 adjacent regulatory RNA [Source:HGNC Symbol;Acc:HGNC:52261]	chr9	86948666	87002033	1	q21.33	39.42	lncRNA	4964
Down	ENSG00000281005	LINC00921	[174]	1	long intergenic non-protein coding RNA 921 [Source:HGNC Symbol;Acc:HGNC:26830]	chr16	3263743	3267567	1	p13.3	50.38	lncRNA	2468
Down	ENSG00000267374	MIR924HG	-	1	MIR924 host gene [Source:HGNC Symbol;Acc:HGNC:44332]	chr18	39206917	39800322	-1	q12.3	37.1	lncRNA	11735
Down	ENSG00000278090	LUNAR1	-	1	leukemia-associated non-coding IGF1R activator RNA 1 [Source:HGNC Symbol;Acc:HGNC:51199]	chr15	99014526	99031054	1	q26.3	48.51	lncRNA	3243
Down	ENSG00000259834	ENSG00000259834	[211]	1	novel transcript	chr1	110653560	110657040	-1	p13.3	31.03	lncRNA	3481
Down	ENSG00000231621	ANKRD44-AS1	-	1	ANKRD44 antisense RNA 1 [Source:HGNC Symbol;Acc:HGNC:41090]	chr2	197197991	197199273	1	q33.1	48.17	lncRNA	455
Down	ENSG00000249599	BMPR1B-DT	[212]	1	BMPR1B divergent transcript [Source:HGNC Symbol;Acc:HGNC:50864]	chr4	94743668	94757681	-1	q22.3	37.7	lncRNA	791
Down	ENSG00000236532	LINC01695	-	1	long intergenic non-protein coding RNA 1695 [Source:HGNC Symbol;Acc:HGNC:52483]	chr21	28116094	28228667	-1	q21.3	36.7	lncRNA	5319
Down	ENSG00000232453	LINC02777	-	1	long intergenic non-protein coding RNA 2777 [Source:HGNC Symbol;Acc:HGNC:54297]	chr1	58882868	58931897	-1	p32.1	43.93	lncRNA	2068
Down	ENSG00000235021	ENSG00000235021	-	1	novel transcript	chr1	246690047	246691821	1	q44	46.93	lncRNA	522
Down	ENSG00000237149	ZNF503-AS2	[34]	1	ZNF503 antisense RNA 2 [Source:HGNC Symbol;Acc:HGNC:23525]	chr10	75401519	75408982	1	q22.2	59.66	lncRNA	3348
Down	ENSG00000233834	ENSG00000233834	-	1	novel transcript	chr7	20217577	20221700	1	p21.1	40.74	lncRNA	901
Down	ENSG00000280739	EIF1B-AS1	-	1	EIF1B antisense RNA 1 [Source:HGNC Symbol;Acc:HGNC:44555]	chr3	40061110	40309698	-1	p22.1	41.48	lncRNA	19361
Down	ENSG00000245571	FAM111A-DT	-	1	FAM111A divergent transcript [Source:HGNC Symbol;Acc:HGNC:53752]	chr11	59130133	59143015	-1	q12.1	42.04	lncRNA	3214
Down	ENSG00000205056	LINC02397	-	1	long intergenic non-protein coding RNA 2397 [Source:HGNC Symbol;Acc:HGNC:53323]	chr12	92466451	92492091	1	q22	38.82	lncRNA	10626
Down	ENSG00000226953	NCKAP5-AS2	-	1	NCKAP5 antisense RNA 2 [Source:HGNC Symbol;Acc:HGNC:54065]	chr2	133264968	133285445	1	q21.2	38.38	lncRNA	1757
Down	ENSG00000233230	ENSG00000233230	-	1	novel transcript	chr2	47905678	47907810	1	p16.3	56.26	lncRNA	856
Down	ENSG00000267666	ENSG00000267666	-	1	novel transcript	chr19	663482	669500	1	p13.3	54.96	lncRNA	3319
Down	ENSG00000273456	ENSG00000273456	-	1	novel transcript	chr2	202374932	202375604	-1	q33.1	51.56	lncRNA	673
Down	ENSG00000231607	DLEU2	-	1	deleted in lymphocytic leukemia 2 [Source:HGNC Symbol;Acc:HGNC:13748]	chr13	49956670	50125720	-1	q14.2	38.87	lncRNA	11574
Down	ENSG00000226419	SLC16A1-AS1	-	1	SLC16A1 antisense RNA 1 [Source:HGNC Symbol;Acc:HGNC:49445]	chr1	112956415	113047055	1	p13.2	43.76	lncRNA	12677
Down	ENSG00000224259	LINC01133	[242]	1	long intergenic non-protein coding RNA 1133 [Source:HGNC Symbol;Acc:HGNC:49447]	chr1	159958035	159984750	1	q23.2	45.81	lncRNA	3676
Down	ENSG00000231437	LINC01750	-	1	long intergenic non-protein coding RNA 1750 [Source:HGNC Symbol;Acc:HGNC:52538]	chr1	111989770	111998842	1	p13.2	49.9	lncRNA	3590
Down	ENSG00000245556	SCAMP1-AS1	-	1	SCAMP1 antisense RNA 1 [Source:HGNC Symbol;Acc:HGNC:50544]	chr5	78342365	78360507	-1	q14.1	42.36	lncRNA	5028
Down	ENSG00000225988	LAMP5-AS1	-	1	LAMP5 antisense RNA 1 [Source:HGNC Symbol;Acc:HGNC:40754]	chr20	9505180	9514998	-1	p12.2	45.81	lncRNA	1928
Down	ENSG00000236886	ENSG00000236886	-	1	novel transcript, antisense to IGFBP5 and TNP1	chr2	216694464	216994079	1	q35	44.57	lncRNA	904
Down	ENSG00000272168	CASC15	[249]	1	cancer susceptibility 15 [Source:HGNC Symbol;Acc:HGNC:28245]	chr6	21664185	22654455	1	p22.3	39.41	lncRNA	34302
Down	ENSG00000235790	PEF1-AS1	-	1	PEF1 and COL16A1 antisense RNA 1 [Source:HGNC Symbol;Acc:HGNC:40154]	chr1	31644049	31660162	1	p35.2	50.48	lncRNA	2216
Down	ENSG00000189419	SPATA41	[239]	1	spermatogenesis associated 41 [Source:HGNC Symbol;Acc:HGNC:48613]	chr15	100344047	100350725	-1	q26.3	47.37	lncRNA	5783
Down	ENSG00000229989	MIR181A1HG	-	1	MIR181A1 host gene [Source:HGNC Symbol;Acc:HGNC:48659]	chr1	198777861	198937471	-1	q32.1	35.36	lncRNA	5391
Down	ENSG00000251002	ENSG00000251002	-	1	novel transcript, antisense to IG_gene_cluster	chr14	22197446	22482959	-1	q11.2	40.42	lncRNA	9092
Down	ENSG00000260552	COSMOC	-	1	cell fate and sterol metabolism associated divergent transcript of MOCOS [Source:HGNC Symbol;Acc:HGNC:51610]	chr18	36179996	36187448	-1	q12.2	52.07	lncRNA	609
Down	ENSG00000267100	ILF3-DT	-	1	ILF3 divergent transcript [Source:HGNC Symbol;Acc:HGNC:27115]	chr19	10651862	10653844	-1	p13.2	51.64	lncRNA	1983
Down	ENSG00000261625	ENSG00000261625	-	1	novel transcript, overlapping to MRGPRF	chr11	69000765	69002048	-1	q13.3	53.58	lncRNA	1284
Down	ENSG00000274020	LINC01138	-	1	long intergenic non-protein coding RNA 1138 [Source:HGNC Symbol;Acc:HGNC:49454]	chr1	148290889	148519604	-1	q21.2	41.51	lncRNA	7757
Down	ENSG00000227630	LINC01132	[258]	1	long intergenic non-protein coding RNA 1132 [Source:HGNC Symbol;Acc:HGNC:49444]	chr1	234724042	234736720	1	q42.3	51.03	lncRNA	5083
Down	ENSG00000237807	ENSG00000237807	-	1	novel transcript	chr8	53493523	53524336	-1	q11.23	44.45	lncRNA	7527
Down	ENSG00000258592	ENSG00000258592	-	1	novel transcript	chr14	57066260	57112660	-1	q22.3	39.67	lncRNA	1577
Down	ENSG00000226891	LINC01359	-	1	long intergenic non-protein coding RNA 1359 [Source:HGNC Symbol;Acc:HGNC:50591]	chr1	64972225	65002489	-1	p31.3	42.17	lncRNA	7863
Down	ENSG00000240207	ENSG00000240207	-	1	novel transcript, antisense to RARRES1	chr3	158732263	158784070	1	q25.32	43.38	lncRNA	6252
Down	ENSG00000272323	TTC23L-AS1	-	1	TTC23L antisense RNA 1 [Source:HGNC Symbol;Acc:HGNC:55215]	chr5	34837549	34839278	-1	p13.2	46.88	lncRNA	1565
Down	ENSG00000229321	ENSG00000229321	-	1	novel transcript	chr2	206798325	206926876	1	q33.3	39.81	lncRNA	5548
Down	ENSG00000248596	ENSG00000248596	-	1	novel transcript	chr5	176143085	176185155	-1	q35.2	43.36	lncRNA	3632
Down	ENSG00000268333	ENSG00000268333	-	1	novel transcript	chr20	58833809	58836529	-1	q13.32	47.89	lncRNA	1153
Down	ENSG00000271270	TMCC1-DT	-	1	TMCC1 divergent transcript [Source:HGNC Symbol;Acc:HGNC:49060]	chr3	129893811	129918575	1	q22.1	44.12	lncRNA	7702
Down	ENSG00000231711	LINC00899	-	1	long intergenic non-protein coding RNA 899 [Source:HGNC Symbol;Acc:HGNC:48583]	chr22	46039907	46044853	-1	q13.31	48.64	lncRNA	4947
Down	ENSG00000233396	LINC01719	-	1	long intergenic non-protein coding RNA 1719 [Source:HGNC Symbol;Acc:HGNC:52506]	chr1	146052566	146061948	1	q21.1	44.84	lncRNA	4614
Down	ENSG00000270103	ENSG00000270103	-	1	RNA, U11 small nuclear	chr1	28648600	28648730	1	p35.3	51.91	lncRNA	131
Down	ENSG00000215417	MIR17HG	[270]	1	miR-17-92a-1 cluster host gene [Source:HGNC Symbol;Acc:HGNC:23564]	chr13	91347820	91354579	1	q31.3	44.48	lncRNA	3774
Down	ENSG00000251364	ENSG00000251364	-	1	novel transcript, antisense to OLFML1	chr11	7418826	7513644	-1	p15.4	44.13	lncRNA	11336
Down	ENSG00000261302	NUP93-DT	-	1	NUP93 divergent transcript [Source:HGNC Symbol;Acc:HGNC:55370]	chr16	56708450	56730010	-1	q13	42.6	lncRNA	1565
Down	ENSG00000221857	ENSG00000221857	-	1	novel transcript	chr19	35138824	35151336	1	q13.12	55.33	lncRNA	735
Down	ENSG00000233593	LINC02609	-	1	long intergenic non-protein coding RNA 2609 [Source:HGNC Symbol;Acc:HGNC:27140]	chr1	90769086	90851658	-1	p22.2	41.67	lncRNA	14354
Down	ENSG00000255559	ZNF252P-AS1	[272]	1	ZNF252P antisense RNA 1 [Source:HGNC Symbol;Acc:HGNC:27821]	chr8	145002811	145006046	1	q24.3	48.67	lncRNA	3236
Down	ENSG00000278611	ZNF426-DT	[247]	1	ZNF426 divergent transcript [Source:HGNC Symbol;Acc:HGNC:53777]	chr19	9538693	9539734	1	p13.2	49.62	lncRNA	905
Down	ENSG00000231652	ENSG00000231652	-	1	novel transcript	chr6	73693903	73696131	-1	q13	45.94	lncRNA	1973
Down	ENSG00000260088	DDX59-AS1	-	1	DDX59 antisense RNA 1 [Source:HGNC Symbol;Acc:HGNC:41094]	chr1	200669507	200694250	1	q32.1	40.65	lncRNA	736
Down	ENSG00000236740	ENSG00000236740	-	1	novel transcript	chr6	53930022	53997667	1	p12.1	38.87	lncRNA	3227
Down	ENSG00000255750	ENSG00000255750	-	1	novel transcript, antisense to SSPN	chr12	26229548	26319720	-1	p11.23	41.38	lncRNA	2399
Down	ENSG00000272695	GAS6-DT	-	1	GAS6 divergent transcript [Source:HGNC Symbol;Acc:HGNC:43694]	chr13	113864112	113866834	1	q34	45.87	lncRNA	2009
Down	ENSG00000272734	ADIRF-AS1	-	1	ADIRF antisense RNA 1 [Source:HGNC Symbol;Acc:HGNC:45127]	chr10	86965345	86971311	-1	q23.2	59.28	lncRNA	5748
Down	ENSG00000255153	TOLLIP-AS1	-	1	TOLLIP antisense RNA 1 (head to head) [Source:HGNC Symbol;Acc:HGNC:27403]	chr11	1309769	1310707	1	p15.5	60.38	lncRNA	939
Down	ENSG00000205791	LOH12CR2	[282]	1	loss of heterozygosity on chromosome 12, region 2 [Source:HGNC Symbol;Acc:HGNC:26524]	chr12	12355406	12357067	-1	p13.2	45.19	lncRNA	1540
Down	ENSG00000234166	ARHGEF19-AS1	-	1	ARHGEF19 antisense RNA 1 [Source:HGNC Symbol;Acc:HGNC:39996]	chr1	16197854	16198357	1	p36.13	49.4	lncRNA	439
Down	ENSG00000235314	LINC00957	-	1	long intergenic non-protein coding RNA 957 [Source:HGNC Symbol;Acc:HGNC:22332]	chr7	44039171	44042306	1	p13	61	lncRNA	2703
Down	ENSG00000257027	ENSG00000257027	-	1	novel transcript	chr12	9658567	9662085	1	p13.31	41.43	lncRNA	2508
Down	ENSG00000229619	MBNL1-AS1	-	1	MBNL1 antisense RNA 1 [Source:HGNC Symbol;Acc:HGNC:44584]	chr3	152245262	152269557	-1	q25.1	37.36	lncRNA	8230
Down	ENSG00000235495	ENSG00000235495	-	1	novel transcript	chr2	67565604	67684077	-1	p14	39.06	lncRNA	167
Down	ENSG00000228437	LINC02474	[284]	1	long intergenic non-protein coding RNA 2474 [Source:HGNC Symbol;Acc:HGNC:53417]	chr1	221966341	221984964	1	q41	43.46	lncRNA	1366
Down	ENSG00000196668	LINC00173	-	1	long intergenic non-protein coding RNA 173 [Source:HGNC Symbol;Acc:HGNC:33791]	chr12	116533422	116536518	1	q24.22	50.76	lncRNA	2607
Down	ENSG00000283235	ENSG00000283235	-	1	novel transcript	chr5	176173345	176199295	-1	q35.2	51.56	lncRNA	3019
Down	ENSG00000231769	ENSG00000231769	-	1	novel transcript	chr6	46096004	46129857	-1	p21.1	40.06	lncRNA	1979
Down	ENSG00000274204	ENSG00000274204	-	1	novel transcript, sense intronic to EFNB2	chr13	106506046	106506713	-1	q33.3	39.22	lncRNA	668
Down	ENSG00000240137	ERICH6-AS1	-	1	ERICH6 antisense RNA 1 [Source:HGNC Symbol;Acc:HGNC:41205]	chr3	150703564	150723005	1	q25.1	42.86	lncRNA	5691
Down	ENSG00000276232	ENSG00000276232	-	1	small Cajal body-specific RNA 10	chr12	6510275	6510522	1	p13.31	45.97	lncRNA	248
Down	ENSG00000270141	TERC	-	1	telomerase RNA component [Source:HGNC Symbol;Acc:HGNC:11727]	chr3	169764520	169765060	-1	q26.2	66.73	lncRNA	541
Down	ENSG00000280594	BTG3-AS1	-	1	BTG3 antisense RNA 1 [Source:HGNC Symbol;Acc:HGNC:53145]	chr21	17611744	17633199	1	q21.1	41.93	lncRNA	2578
Down	ENSG00000231064	THBS3-AS1	-	1	THBS3 antisense RNA 1 [Source:HGNC Symbol;Acc:HGNC:40582]	chr1	155195004	155205495	1	q22	55.17	lncRNA	2466
Down	ENSG00000259456	ADNP-AS1	-	1	ADNP antisense RNA 1 [Source:HGNC Symbol;Acc:HGNC:51227]	chr20	50930984	50945148	1	q13.13	41.57	lncRNA	1049
Down	ENSG00000267470	ZNF571-AS1	-	1	ZNF571 antisense RNA 1 [Source:HGNC Symbol;Acc:HGNC:44324]	chr19	37548914	37587348	1	q13.12	41.03	lncRNA	7599
Down	ENSG00000248515	ENSG00000248515	-	1	novel transcript	chr4	19455418	19938448	1	p15.31	36.59	lncRNA	4694
Down	ENSG00000239523	MYLK-AS1	-	1	MYLK antisense RNA 1 [Source:HGNC Symbol;Acc:HGNC:42440]	chr3	123585300	123644568	1	q21.1	44.2	lncRNA	4496
Down	ENSG00000271133	ITGB8-AS1	-	1	ITGB8 antisense RNA 1 [Source:HGNC Symbol;Acc:HGNC:55257]	chr7	20328299	20331747	-1	p21.1	52.28	lncRNA	896
Down	ENSG00000269887	ENSG00000269887	-	1	novel transcript, sense intronic to PBX1	chr1	164680085	164680799	1	q23.3	33.15	lncRNA	715
Down	ENSG00000204261	PSMB8-AS1	[246]	1	PSMB8 antisense RNA 1 (head to head) [Source:HGNC Symbol;Acc:HGNC:39758]	chr6	32844078	32846500	1	p21.32	52.21	lncRNA	2423
Down	ENSG00000279277	ENSG00000279277	-	1	novel transcript	chr3	108032456	108039916	-1	q13.12	44.39	lncRNA	7461
Down	ENSG00000203739	PRDX6-AS1	-	1	PRDX6 antisense RNA 1 [Source:HGNC Symbol;Acc:HGNC:54870]	chr1	173417793	173489407	-1	q25.1	40.71	lncRNA	4797
Down	ENSG00000270066	ENSG00000270066	-	1	small Cajal body-specific RNA 2	chr1	109100193	109100619	1	p13.3	65.81	lncRNA	427
Down	ENSG00000245149	RNF139-AS1	-	1	RNF139 antisense RNA 1 (head to head) [Source:HGNC Symbol;Acc:HGNC:48940]	chr8	124462485	124474582	-1	q24.13	41.49	lncRNA	6949
Down	ENSG00000203993	ARRDC1-AS1	-	1	ARRDC1 antisense RNA 1 [Source:HGNC Symbol;Acc:HGNC:23395]	chr9	137615332	137618906	-1	q34.3	56.78	lncRNA	3545
Down	ENSG00000215424	MCM3AP-AS1	-	1	MCM3AP antisense RNA 1 [Source:HGNC Symbol;Acc:HGNC:16417]	chr21	46229196	46259390	1	q22.3	46.51	lncRNA	10023
Down	ENSG00000232995	RGS5	[289]	1	regulator of G protein signaling 5 [Source:NCBI gene (formerly Entrezgene);Acc:8490]	chr1	163244505	163321894	-1	q23.3	37.85	lncRNA	3626
Down	ENSG00000132832	ENSG00000132832	-	1	novel transcript	chr20	44656451	44696096	-1	q13.12	46.49	lncRNA	1416
Down	ENSG00000151303	ENSG00000151303	-	1	novel transcript	chr10	86992406	87010203	1	q23.2	40.61	lncRNA	4560
Down	ENSG00000165511	ZNF22-AS1	-	1	ZNF22 antisense RNA 1 [Source:HGNC Symbol;Acc:HGNC:23509]	chr10	44997698	45000888	-1	q11.21	44.41	lncRNA	3078
Down	ENSG00000167912	ENSG00000167912	-	1	novel transcript	chr8	59119040	59123478	1	q12.1	45.48	lncRNA	3875
Down	ENSG00000176320	ENSG00000176320	-	1	novel transcript	chr1	158197922	158203877	-1	q23.1	32.72	lncRNA	1999
Down	ENSG00000179743	FLJ37453	-	1	uncharacterized LOC729614 [Source:NCBI gene (formerly Entrezgene);Acc:729614]	chr1	15834474	15848147	-1	p36.21	50.48	lncRNA	2473
Down	ENSG00000180712	LINC02363	-	1	long intergenic non-protein coding RNA 2363 [Source:HGNC Symbol;Acc:HGNC:53286]	chr4	184334292	184353977	-1	q35.1	43.77	lncRNA	2716
Down	ENSG00000186235	LINC02610	-	1	long intergenic non-protein coding RNA 2610 [Source:HGNC Symbol;Acc:HGNC:27177]	chr2	238224552	238231699	-1	q37.3	54.74	lncRNA	3860
Down	ENSG00000188004	SNHG28	-	1	small nucleolar RNA host gene 28 [Source:HGNC Symbol;Acc:HGNC:27647]	chr1	159834480	159855071	-1	q23.2	47.94	lncRNA	5656
Down	ENSG00000189316	ENSG00000189316	-	1	novel transcript, antisense to ZNF273	chr7	64888527	64890100	-1	q11.21	64.1	lncRNA	1062
Down	ENSG00000196167	COLCA1	-	1	colorectal cancer associated 1 [Source:HGNC Symbol;Acc:HGNC:33789]	chr11	111290787	111305498	-1	q23.1	44.76	lncRNA	9186
Down	ENSG00000203706	SERTAD4-AS1	-	1	SERTAD4 antisense RNA 1 [Source:HGNC Symbol;Acc:HGNC:32019]	chr1	210231456	210234047	-1	q32.2	58.06	lncRNA	1004
Down	ENSG00000205537	ENSG00000205537	-	1	novel transcript, antisense to VDR	chr12	47882649	47901525	1	q13.11	49.49	lncRNA	1287
Down	ENSG00000206417	H1-10-AS1	-	1	H1-10 antisense RNA 1 [Source:HGNC Symbol;Acc:HGNC:27953]	chr3	129315392	129326225	1	q21.3	57.61	lncRNA	3420
Down	ENSG00000213468	FIRRE	-	1	firre intergenic repeating RNA element [Source:HGNC Symbol;Acc:HGNC:49627]	chrX	131688779	131830862	-1	q26.2	40.94	lncRNA	12157
Down	ENSG00000214293	APTR	[302]	1	Alu-mediated CDKN1A/p21 transcriptional regulator [Source:HGNC Symbol;Acc:HGNC:44173]	chr7	77657659	77696267	-1	q11.23	43.27	lncRNA	5916
Down	ENSG00000215014	ENSG00000215014	-	1	novel transcript	chr1	1574102	1577075	1	p36.33	56.15	lncRNA	2349
Down	ENSG00000215256	DHRS4-AS1	[194]	1	DHRS4 antisense RNA 1 [Source:HGNC Symbol;Acc:HGNC:23175]	chr14	23938219	24052555	-1	q11.2	44.12	lncRNA	8445
Down	ENSG00000215386	MIR99AHG	-	1	mir-99a-let-7c cluster host gene [Source:HGNC Symbol;Acc:HGNC:1274]	chr21	15928296	16645467	1	q21.1	35.52	lncRNA	42926
Down	ENSG00000223935	LGALSL-DT	-	1	LGALSL divergent transcript [Source:HGNC Symbol;Acc:HGNC:53951]	chr2	64395220	64453967	-1	p14	42.61	lncRNA	3197
Down	ENSG00000223946	ENSG00000223946	-	1	novel transcript	chr6	42030053	42031382	1	p21.1	57.89	lncRNA	161
Down	ENSG00000223949	ROR1-AS1	-	1	ROR1 antisense RNA 1 [Source:HGNC Symbol;Acc:HGNC:40508]	chr1	64094379	64171342	-1	p31.3	40.87	lncRNA	4614
Down	ENSG00000223960	CHROMR	-	1	cholesterol induced regulator of metabolism RNA [Source:HGNC Symbol;Acc:HGNC:54059]	chr2	178413635	178440243	1	q31.2	39.9	lncRNA	10946
Down	ENSG00000224173	LINC02831	-	1	long intergenic non-protein coding RNA 2831 [Source:HGNC Symbol;Acc:HGNC:54365]	chr2	67562067	67620545	1	p14	37.99	lncRNA	3501
Down	ENSG00000224222	LINC02636	[303]	1	long intergenic non-protein coding RNA 2636 [Source:HGNC Symbol;Acc:HGNC:54119]	chr10	69994276	70019496	-1	q22.1	38.87	lncRNA	1527
Down	ENSG00000224307	ENSG00000224307	-	1	novel transcript	chr9	129282458	129312665	1	q34.11	47.11	lncRNA	1190
Down	ENSG00000224318	CHL1-AS2	-	1	CHL1 antisense RNA 2 [Source:HGNC Symbol;Acc:HGNC:40147]	chr3	109707	197341	-1	p26.3	37.67	lncRNA	3868
Down	ENSG00000224388	BACE2-IT1	-	1	BACE2 intronic transcript 1 [Source:HGNC Symbol;Acc:HGNC:16024]	chr21	41180097	41180626	1	q22.2	48.3	lncRNA	382
Down	ENSG00000224467	TANK-AS1	-	1	TANK antisense RNA 1 [Source:HGNC Symbol;Acc:HGNC:40575]	chr2	161096231	161160224	-1	q24.2	37.69	lncRNA	503
Down	ENSG00000224596	ZMIZ1-AS1	-	1	ZMIZ1 antisense RNA 1 [Source:HGNC Symbol;Acc:HGNC:27433]	chr10	78943328	79067895	-1	q22.3	51.66	lncRNA	5112
Down	ENSG00000224731	ENSG00000224731	-	1	novel transcript	chr2	80028012	80030551	-1	p12	38.58	lncRNA	486
Down	ENSG00000224939	LINC00184	[304]	1	long intergenic non-protein coding RNA 184 [Source:HGNC Symbol;Acc:HGNC:37192]	chr1	234629311	234634780	1	q42.3	41.99	lncRNA	2270
Down	ENSG00000225265	TAF1A-AS1	-	1	TAF1A antisense RNA 1 [Source:HGNC Symbol;Acc:HGNC:40573]	chr1	222589825	222593843	1	q41	39.71	lncRNA	2261
Down	ENSG00000225376	TMEM246-AS1	-	1	TMEM246 antisense RNA 1 [Source:HGNC Symbol;Acc:HGNC:51191]	chr9	101468349	101482199	1	q31.1	42.62	lncRNA	1863
Down	ENSG00000225472	ENSG00000225472	-	1	novel transcript	chr9	14317073	14358490	1	p22.3	43.07	lncRNA	1648
Down	ENSG00000225518	LINC01703	-	1	long intergenic non-protein coding RNA 1703 [Source:HGNC Symbol;Acc:HGNC:52491]	chr1	226083590	226090465	1	q42.12	49.24	lncRNA	1613
Down	ENSG00000226416	MRPL23-AS1	[34]	1	MRPL23 antisense RNA 1 [Source:HGNC Symbol;Acc:HGNC:42812]	chr11	1983237	1989920	-1	p15.5	64.03	lncRNA	1876
Down	ENSG00000226496	LINC00323	-	1	long intergenic non-protein coding RNA 323 [Source:HGNC Symbol;Acc:HGNC:19720]	chr21	41141493	41148198	-1	q22.2	49.09	lncRNA	2570
Down	ENSG00000227165	WDR11-AS1	-	1	WDR11 antisense RNA 1 [Source:HGNC Symbol;Acc:HGNC:27437]	chr10	120759898	120851457	-1	q26.12	43.04	lncRNA	6711
Down	ENSG00000227199	ST7-AS1	-	1	ST7 antisense RNA 1 [Source:HGNC Symbol;Acc:HGNC:16000]	chr7	116952446	116954334	-1	q31.2	58.55	lncRNA	1889
Down	ENSG00000227258	SMIM2-AS1	-	1	SMIM2 antisense RNA 1 [Source:HGNC Symbol;Acc:HGNC:42674]	chr13	44110451	44240517	1	q14.11	42.17	lncRNA	5183
Down	ENSG00000227407	ENSG00000227407	-	1	novel transcript	chr19	54430654	54434698	-1	q13.42	56.44	lncRNA	529
Down	ENSG00000227803	ENSG00000227803	-	1	novel transcript, antisense to MBOAT1	chr6	20212087	20317739	1	p22.3	41.56	lncRNA	380
Down	ENSG00000228037	ENSG00000228037	-	1	novel transcript	chr1	2581560	2584533	1	p36.32	51.11	lncRNA	626
Down	ENSG00000228624	HDAC2-AS2	-	1	HDAC2 and HS3ST5 antisense RNA 2 [Source:HGNC Symbol;Acc:HGNC:43590]	chr6	113969701	114471705	1	q21	37.94	lncRNA	8063
Down	ENSG00000228775	WEE2-AS1	-	1	WEE2 antisense RNA 1 [Source:HGNC Symbol;Acc:HGNC:48669]	chr7	141704003	141738346	-1	q34	40	lncRNA	6678
Down	ENSG00000228794	LINC01128	-	1	long intergenic non-protein coding RNA 1128 [Source:HGNC Symbol;Acc:HGNC:49377]	chr1	825138	859446	1	p36.33	46.54	lncRNA	15682
Down	ENSG00000228804	ENSG00000228804	-	1	novel transcript, antisense to RTP2 and BCL6	chr3	187702313	187733849	1	q27.3	44.08	lncRNA	717
Down	ENSG00000228835	ENSG00000228835	-	1	novel transcript, antisense to KLHL14	chr18	32769795	32774413	1	q12.1	55.77	lncRNA	1661
Down	ENSG00000229531	RABGAP1L-AS1	-	1	RABGAP1L antisense RNA 1 [Source:HGNC Symbol;Acc:HGNC:41057]	chr1	174934947	174954261	-1	q25.1	39.86	lncRNA	975
Down	ENSG00000229589	ACVR2B-AS1	-	1	ACVR2B antisense RNA 1 [Source:HGNC Symbol;Acc:HGNC:44161]	chr3	38451027	38454820	-1	p22.2	56.48	lncRNA	2517
Down	ENSG00000230002	ALMS1-IT1	-	1	ALMS1 intronic transcript 1 [Source:HGNC Symbol;Acc:HGNC:41305]	chr2	73456764	73459482	1	p13.1	37.18	lncRNA	2105
Down	ENSG00000230257	NFE4	-	1	nuclear factor, erythroid 4 [Source:HGNC Symbol;Acc:HGNC:29902]	chr7	102973522	102988856	1	q22.1	42.69	lncRNA	1072
Down	ENSG00000230498	ENSG00000230498	-	1	novel transcript	chr1	77081984	77086402	1	p31.1	40.39	lncRNA	2086
Down	ENSG00000230615	ENSG00000230615	-	1	novel transcript	chr1	44030437	44115913	1	p34.1	44.74	lncRNA	10561
Down	ENSG00000230749	MEIS1-AS2	-	1	MEIS1 antisense RNA 2 [Source:HGNC Symbol;Acc:HGNC:40370]	chr2	66439088	66444221	-1	p14	46.61	lncRNA	2661
Down	ENSG00000231050	ENSG00000231050	-	1	novel transcript	chr1	1891471	1892658	1	p36.33	65.32	lncRNA	906
Down	ENSG00000231074	HCG18	[305]	1	HLA complex group 18 [Source:HGNC Symbol;Acc:HGNC:31337]	chr6	30286690	30327382	-1	p22.1	42.85	lncRNA	17631
Down	ENSG00000231128	ENSG00000231128	-	1	novel transcript, antisense to PTPN22	chr1	113812379	113870159	1	p13.2	39.05	lncRNA	1582
Down	ENSG00000231226	TRIM31-AS1	-	1	TRIM31 antisense RNA 1 [Source:HGNC Symbol;Acc:HGNC:39761]	chr6	30105240	30114724	1	p22.1	46.09	lncRNA	549
Down	ENSG00000231233	CFAP58-DT	-	1	CFAP58 divergent transcript [Source:HGNC Symbol;Acc:HGNC:45243]	chr10	104351591	104353575	-1	q25.1	41.31	lncRNA	795
Down	ENSG00000231768	LINC01354	[214]	1	long intergenic non-protein coding RNA 1354 [Source:HGNC Symbol;Acc:HGNC:50581]	chr1	234527887	234531803	-1	q42.2	46	lncRNA	3244
Down	ENSG00000231969	MMADHC-DT	-	1	MMADHC divergent transcript [Source:HGNC Symbol;Acc:HGNC:41087]	chr2	149587196	150047447	1	q23.2	37.4	lncRNA	7149
Down	ENSG00000232046	LINC01798	-	1	long intergenic non-protein coding RNA 1798 [Source:HGNC Symbol;Acc:HGNC:52588]	chr2	66574030	66731223	1	p14	39.07	lncRNA	3913
Down	ENSG00000232063	ENSG00000232063	-	1	novel transcript	chr9	94332459	94363013	1	q22.32	44.81	lncRNA	4244
Down	ENSG00000232229	LINC00865	-	1	long intergenic non-protein coding RNA 865 [Source:HGNC Symbol;Acc:HGNC:45170]	chr10	89829483	89840861	1	q23.31	42.12	lncRNA	5911
Down	ENSG00000232542	DPYD-IT1	-	1	DPYD intronic transcript 1 [Source:HGNC Symbol;Acc:HGNC:41326]	chr1	97394154	97420141	-1	p21.3	35.82	lncRNA	401
Down	ENSG00000232719	ENSG00000232719	-	1	novel transcript	chr2	201101382	201103136	1	q33.1	45.07	lncRNA	1269
Down	ENSG00000232756	DDX3ILA1	-	1	DDX3 interacting lncRNA 1 [Source:HGNC Symbol;Acc:HGNC:55358]	chr7	77990384	77995171	1	q21.11	45.38	lncRNA	2298
Down	ENSG00000232860	SMG7-AS1	-	1	SMG7 antisense RNA 1 [Source:HGNC Symbol;Acc:HGNC:24518]	chr1	183460874	183472265	-1	q25.3	41.54	lncRNA	3383
Down	ENSG00000233009	NALCN-AS1	-	1	NALCN antisense RNA 1 [Source:HGNC Symbol;Acc:HGNC:42743]	chr13	100708325	101059286	1	q32.3	41.35	lncRNA	2846
Down	ENSG00000233110	ENSG00000233110	-	1	novel transcript, antisense to SORBS2	chr4	185587909	185594003	1	q35.1	40.9	lncRNA	1789
Down	ENSG00000233729	NCKAP5-AS1	-	1	NCKAP5 antisense RNA 1 [Source:HGNC Symbol;Acc:HGNC:41246]	chr2	132915557	132931494	1	q21.2	38.62	lncRNA	1711
Down	ENSG00000233968	ENSG00000233968	-	1	novel transcript, antisense to C10orf112	chr10	19710328	19728550	-1	p12.31	37.22	lncRNA	4675
Down	ENSG00000234593	KAZN-AS1	-	1	KAZN antisense RNA 1 [Source:HGNC Symbol;Acc:HGNC:53610]	chr1	14338825	14419973	-1	p36.21	42.04	lncRNA	2858
Down	ENSG00000234899	SOX9-AS1	-	1	SOX9 antisense RNA 1 [Source:HGNC Symbol;Acc:HGNC:49321]	chr17	72067099	72237203	-1	q24.3	44.33	lncRNA	15844
Down	ENSG00000234900	ENSG00000234900	-	1	novel transcript	chr20	10753278	10765286	-1	p12.2	41.74	lncRNA	729
Down	ENSG00000234912	SNHG20	[306]	1	small nucleolar RNA host gene 20 [Source:HGNC Symbol;Acc:HGNC:33099]	chr17	77086716	77099902	1	q25.2	48.65	lncRNA	6087
Down	ENSG00000235885	LINC01828	-	1	long intergenic non-protein coding RNA 1828 [Source:HGNC Symbol;Acc:HGNC:52634]	chr2	67086446	67311439	1	p14	36.94	lncRNA	8246
Down	ENSG00000235997	LINC01936	-	1	long intergenic non-protein coding RNA 1936 [Source:HGNC Symbol;Acc:HGNC:52759]	chr2	30346623	30361010	1	p23.1	47.93	lncRNA	4650
Down	ENSG00000236266	ENSG00000236266	-	1	novel transcript	chr1	7810242	7827342	-1	p36.23	39.14	lncRNA	830
Down	ENSG00000236276	NDP-AS1	-	1	NDP antisense RNA 1 [Source:HGNC Symbol;Acc:HGNC:40395]	chrX	43949732	43971582	1	p11.3	42.37	lncRNA	2165
Down	ENSG00000236751	LINC01186	-	1	long intergenic non-protein coding RNA 1186 [Source:HGNC Symbol;Acc:HGNC:49573]	chrX	46256759	46327680	-1	p11.3	41.58	lncRNA	2526
Down	ENSG00000236790	LINC00299	-	1	long intergenic non-protein coding RNA 299 [Source:HGNC Symbol;Acc:HGNC:27940]	chr2	7988683	8488090	-1	p25.1	43.37	lncRNA	22322
Down	ENSG00000236869	ZKSCAN7-AS1	-	1	ZKSCAN7 ZNF cluster antisense RNA 1 [Source:HGNC Symbol;Acc:HGNC:53964]	chr3	44557357	44685653	-1	p21.31	42.72	lncRNA	456
Down	ENSG00000236996	MLIP-IT1	-	1	MLIP intronic transcript 1 [Source:HGNC Symbol;Acc:HGNC:41461]	chr6	53998890	54007152	1	p12.1	39.67	lncRNA	643
Down	ENSG00000237179	LINC01797	-	1	long intergenic non-protein coding RNA 1797 [Source:HGNC Symbol;Acc:HGNC:52587]	chr2	66696190	66703252	-1	p14	36.34	lncRNA	1883
Down	ENSG00000237188	ENSG00000237188	-	1	novel transcript, antisense to FMO5	chr1	147172755	147295734	1	q21.1	40.5	lncRNA	4139
Down	ENSG00000237429	ENSG00000237429	-	1	novel transcript	chr1	27525805	27530561	1	p36.11	58.55	lncRNA	283
Down	ENSG00000237512	UNC5B-AS1	[307]	1	UNC5B antisense RNA 1 [Source:HGNC Symbol;Acc:HGNC:45096]	chr10	71217224	71218228	-1	q22.1	61.29	lncRNA	707
Down	ENSG00000237753	ENSG00000237753	-	1	novel transcript (FLJ42351)	chr2	112641832	112645720	-1	q14.1	48.98	lncRNA	3224
Down	ENSG00000237853	NFIA-AS1	-	1	NFIA antisense RNA 1 [Source:HGNC Symbol;Acc:HGNC:40402]	chr1	61248945	61253510	-1	p31.3	35	lncRNA	842
Down	ENSG00000238164	TNFRSF14-AS1	-	1	TNFRSF14 antisense RNA 1 [Source:HGNC Symbol;Acc:HGNC:26966]	chr1	2549920	2557031	-1	p36.32	62.87	lncRNA	6137
Down	ENSG00000239911	PRKAG2-AS1	-	1	PRKAG2 antisense RNA 1 [Source:HGNC Symbol;Acc:HGNC:40468]	chr7	151877042	151879223	1	q36.1	60.13	lncRNA	1163
Down	ENSG00000242258	LINC00996	[308]	1	long intergenic non-protein coding RNA 996 [Source:HGNC Symbol;Acc:HGNC:27800]	chr7	150433654	150448140	1	q36.1	45.13	lncRNA	2171
Down	ENSG00000242686	PDE6B-AS1	-	1	PDE6B antisense RNA 1 [Source:HGNC Symbol;Acc:HGNC:40438]	chr4	652850	656213	-1	p16.3	61.53	lncRNA	2353
Down	ENSG00000242908	AADACL2-AS1	-	1	AADACL2 antisense RNA 1 [Source:HGNC Symbol;Acc:HGNC:50301]	chr3	151751443	151928175	-1	q25.1	36.95	lncRNA	635
Down	ENSG00000243176	ENSG00000243176	-	1	novel transcript	chr3	157174201	157381265	1	q25.31	39.24	lncRNA	9051
Down	ENSG00000243795	LINC02044	-	1	long intergenic non-protein coding RNA 2044 [Source:HGNC Symbol;Acc:HGNC:52884]	chr3	113142350	113167819	-1	q13.2	41.58	lncRNA	2502
Down	ENSG00000243819	RN7SL832P	-	1	RNA, 7SL, cytoplasmic 832, pseudogene [Source:HGNC Symbol;Acc:HGNC:46848]	chr2	10690344	10692099	1	p25.1	45.27	lncRNA	1756
Down	ENSG00000244383	FAM3D-AS1	-	1	FAM3D antisense RNA 1 [Source:HGNC Symbol;Acc:HGNC:41276]	chr3	58607080	58644491	1	p14.2	51.02	lncRNA	1812
Down	ENSG00000244998	ENSG00000244998	-	1	novel transcript, antisense to PTP4A3	chr8	141389939	141392574	-1	q24.3	63.69	lncRNA	1380
Down	ENSG00000245468	LINC02447	-	1	long intergenic non-protein coding RNA 2447 [Source:HGNC Symbol;Acc:HGNC:53379]	chr4	7093776	7103394	-1	p16.1	47.86	lncRNA	4567
Down	ENSG00000245498	ENSG00000245498	-	1	novel transcript, antisense to C11orf61	chr11	124800424	124834487	1	q24.2	43.44	lncRNA	10457
Down	ENSG00000246223	LINC01550	-	1	long intergenic non-protein coding RNA 1550 [Source:HGNC Symbol;Acc:HGNC:20111]	chr14	97924637	97978124	-1	q32.2	43.16	lncRNA	6913
Down	ENSG00000248019	FAM13A-AS1	-	1	FAM13A antisense RNA 1 [Source:HGNC Symbol;Acc:HGNC:19370]	chr4	88709298	88730103	1	q22.1	39.45	lncRNA	9781
Down	ENSG00000248092	NNT-AS1	[309]	1	NNT antisense RNA 1 [Source:HGNC Symbol;Acc:HGNC:49005]	chr5	43571594	43603230	-1	p12	41.09	lncRNA	6987
Down	ENSG00000248125	ENSG00000248125	-	1	novel transcript	chr5	145429811	145451108	1	q32	39.47	lncRNA	2323
Down	ENSG00000248161	ENSG00000248161	-	1	novel transcript	chr4	102418602	102450010	-1	q24	38.25	lncRNA	992
Down	ENSG00000248668	OXCT1-AS1	-	1	OXCT1 antisense RNA 1 [Source:HGNC Symbol;Acc:HGNC:40423]	chr5	41869927	41872241	1	p13.1	49.76	lncRNA	2217
Down	ENSG00000249348	UGDH-AS1	-	1	UGDH antisense RNA 1 [Source:HGNC Symbol;Acc:HGNC:40601]	chr4	39528019	39594707	1	p14	42.24	lncRNA	2787
Down	ENSG00000249352	LINC02198	-	1	long intergenic non-protein coding RNA 2198 [Source:HGNC Symbol;Acc:HGNC:53064]	chr5	68970692	69030165	-1	q13.1	40.37	lncRNA	1196
Down	ENSG00000249678	ENSG00000249678	-	1	novel transcript	chr4	30776257	30793970	-1	p15.1	34.46	lncRNA	180
Down	ENSG00000250222	ENSG00000250222	-	1	novel transcript	chr5	181191875	181194429	1	q35.3	53.5	lncRNA	535
Down	ENSG00000250682	LINC00491	-	1	long intergenic non-protein coding RNA 491 [Source:HGNC Symbol;Acc:HGNC:43428]	chr5	102604220	102671765	-1	q21.1	37.55	lncRNA	2805
Down	ENSG00000250699	ENSG00000250699	-	1	novel transcript, antisense to CEP164	chr11	117316362	117328038	-1	q23.3	44.57	lncRNA	488
Down	ENSG00000250900	TRIM7-AS1	-	1	TRIM7 antisense RNA 1 [Source:HGNC Symbol;Acc:HGNC:40764]	chr5	181195496	181203103	1	q35.3	52.09	lncRNA	1484
Down	ENSG00000250986	LINC02600	-	1	long intergenic non-protein coding RNA 2600 [Source:HGNC Symbol;Acc:HGNC:53177]	chr4	3758748	3763390	-1	p16.3	56.86	lncRNA	4525
Down	ENSG00000251458	ENSG00000251458	-	1	novel transcript	chr5	176124210	176131461	-1	q35.2	43.15	lncRNA	354
Down	ENSG00000251660	ENSG00000251660	-	1	novel transcript	chr7	30157531	30159534	1	p14.3	38.47	lncRNA	614
Down	ENSG00000254563	ENSG00000254563	-	1	novel transcript	chr11	78749250	78756480	1	q14.1	46.78	lncRNA	320
Down	ENSG00000254602	ENSG00000254602	-	1	novel transcript, sense overlapping CLP1	chr11	57638024	57652790	1	q12.1	52.34	lncRNA	3223
Down	ENSG00000254693	ENSG00000254693	-	1	novel transcript	chr11	44604508	44605337	-1	p11.2	56.51	lncRNA	543
Down	ENSG00000254744	ENSG00000254744	-	1	novel transcript, antisense to ADAMTS17	chr15	99970215	99974010	1	q26.3	52.05	lncRNA	572
Down	ENSG00000254756	ENSG00000254756	-	1	novel transcript	chr11	66334494	66339875	1	q13.2	62.52	lncRNA	516
Down	ENSG00000254810	ENSG00000254810	-	1	novel transcript	chr11	76654169	76656712	-1	q13.5	59.24	lncRNA	651
Down	ENSG00000255092	ENSG00000255092	-	1	novel transcript	chr11	44606170	44608101	-1	p11.2	50.21	lncRNA	567
Down	ENSG00000255250	ENSG00000255250	-	1	novel transcript	chr11	86727355	86765467	1	q14.2	42.21	lncRNA	917
Down	ENSG00000255480	ENSG00000255480	-	1	novel transcript	chr11	30425552	30429268	1	p14.1	40.41	lncRNA	365
Down	ENSG00000255571	MIR9-3HG	-	1	MIR9-3 host gene [Source:HGNC Symbol;Acc:HGNC:27388]	chr15	89361579	89398487	1	q26.1	53.82	lncRNA	9782
Down	ENSG00000255882	ENSG00000255882	-	1	novel transcript	chr12	9867027	9869808	1	p13.31	31.34	lncRNA	719
Down	ENSG00000256013	ENSG00000256013	-	1	novel transcript, antisense to EMP2	chr16	10529440	10532082	1	p13.13	49.3	lncRNA	533
Down	ENSG00000256879	ENSG00000256879	-	1	novel transcript	chr12	20361732	20370262	-1	p12.2	41.64	lncRNA	525
Down	ENSG00000257239	ENSG00000257239	-	1	novel transcript	chr12	41829898	41932592	-1	q12	38.49	lncRNA	499
Down	ENSG00000257764	ENSG00000257764	-	1	novel transcript, antisense to LYZ	chr12	69353493	69354225	-1	q15	40.52	lncRNA	599
Down	ENSG00000258425	ENSG00000258425	-	1	novel transcript, antisense to LTBP2	chr14	74552181	74560048	1	q24.3	49.36	lncRNA	518
Down	ENSG00000258451	EGILA	-	1	EGFR interacting lncRNA [Source:HGNC Symbol;Acc:HGNC:54482]	chr14	20693480	20707120	-1	q11.2	43.7	lncRNA	915
Down	ENSG00000258458	ENSG00000258458	-	1	novel transcript, antisense to OXA1L	chr14	22701476	22766562	-1	q11.2	42.49	lncRNA	3254
Down	ENSG00000258584	FAM181A-AS1	-	1	FAM181A antisense RNA 1 [Source:HGNC Symbol;Acc:HGNC:20133]	chr14	93904730	93927066	-1	q32.12	49.82	lncRNA	3706
Down	ENSG00000258711	ENSG00000258711	-	1	novel transcript	chr14	50956259	50962002	-1	q22.1	45.65	lncRNA	4714
Down	ENSG00000259031	ENSG00000259031	-	1	novel transcript	chr14	100538939	100540409	1	q32.2	65.4	lncRNA	553
Down	ENSG00000259345	ENSG00000259345	-	1	novel transcript	chr15	38865322	39427195	-1	q14	38.89	lncRNA	6996
Down	ENSG00000259488	ENSG00000259488	-	1	novel transcript, antisense to DUT	chr15	48312353	48331856	-1	q21.1	43.49	lncRNA	4710
Down	ENSG00000259652	ENSG00000259652	-	1	novel transcript, antisense to TSPAN3	chr15	77043680	77045160	1	q24.3	49.29	lncRNA	264
Down	ENSG00000259719	LINC02284	-	1	long intergenic non-protein coding RNA 2284 [Source:HGNC Symbol;Acc:HGNC:53201]	chr14	56310880	56427032	1	q22.3	40.89	lncRNA	4497
Down	ENSG00000259964	THSD4-AS1	-	1	THSD4 antisense RNA 1 [Source:HGNC Symbol;Acc:HGNC:51420]	chr15	71147650	71189064	-1	q23	40.53	lncRNA	4603
Down	ENSG00000260391	ENSG00000260391	-	1	novel transcript, overlapping to KALRN	chr3	124723788	124726325	1	q21.2	35.54	lncRNA	2538
Down	ENSG00000260468	LINC01290	-	1	long intergenic non-protein coding RNA 1290 [Source:HGNC Symbol;Acc:HGNC:50356]	chr16	10514842	10528202	-1	p13.13	48.19	lncRNA	502
Down	ENSG00000260493	ENSG00000260493	-	1	novel transcript, antisense to E2F5	chr8	85172077	85177062	-1	q21.2	37.73	lncRNA	1540
Down	ENSG00000260572	ENSG00000260572	-	1	novel transcript, antisense to PPM1L	chr3	160753428	160755142	-1	q25.33	45.71	lncRNA	1715
Down	ENSG00000260681	ENSG00000260681	-	1	novel transcript, antisense to TMC5	chr16	19410729	19411662	-1	p12.3	55.57	lncRNA	665
Down	ENSG00000261359	PYCARD-AS1	-	1	PYCARD antisense RNA 1 [Source:HGNC Symbol;Acc:HGNC:45036]	chr16	31201885	31203452	1	p11.2	62.82	lncRNA	1095
Down	ENSG00000261488	TBILA	-	1	TGF-beta induced lncRNA [Source:HGNC Symbol;Acc:HGNC:53943]	chr3	112133423	112135359	1	q13.2	42.54	lncRNA	1937
Down	ENSG00000261610	ENSG00000261610	-	1	novel transcript	chr21	32259804	32261585	-1	q22.11	44.61	lncRNA	1782
Down	ENSG00000261646	ENSG00000261646	-	1	novel transcript	chr4	173467833	173470041	-1	q34.1	37.57	lncRNA	2209
Down	ENSG00000261654	ENSG00000261654	-	1	novel transcript, sense overlapping C1orf103	chr1	110936369	110942353	-1	p13.3	33.75	lncRNA	5985
Down	ENSG00000261888	ENSG00000261888	-	1	novel transcript	chr17	83104255	83106910	1	q25.3	57.08	lncRNA	2656
Down	ENSG00000262681	ENSG00000262681	-	1	novel transcript	chr17	19719059	19722428	1	p11.2	53.26	lncRNA	3370
Down	ENSG00000262873	ENSG00000262873	-	1	novel transcript	chr17	81017969	81028079	-1	q25.3	56.76	lncRNA	2295
Down	ENSG00000264177	ENSG00000264177	-	1	novel transcript	chr17	18379855	18388984	-1	p11.2	56.69	lncRNA	4955
Down	ENSG00000266950	ENSG00000266950	-	1	novel transcript	chr19	9793621	9802301	1	p13.2	45.96	lncRNA	408
Down	ENSG00000266954	ENSG00000266954	-	1	novel transcript, antisense C18orf1	chr18	13644815	13645685	-1	p11.21	53.85	lncRNA	538
Down	ENSG00000267077	ENSG00000267077	-	1	novel transcript, antisense to novel protein	chr16	4795265	4796532	-1	p13.3	65.85	lncRNA	720
Down	ENSG00000267136	ENSG00000267136	-	1	novel transcript, antisense C18orf1	chr18	13514520	13522888	-1	p11.21	44.44	lncRNA	4745
Down	ENSG00000267328	ENSG00000267328	-	1	novel transcript	chr19	35754566	35755490	1	q13.12	57.41	lncRNA	660
Down	ENSG00000267393	ENSG00000267393	-	1	novel transcript, antisense C18orf1	chr18	13362203	13366243	-1	p11.21	44.12	lncRNA	480
Down	ENSG00000267503	ENSG00000267503	-	1	novel transcript, antisense C18orf1	chr18	13561399	13565035	-1	p11.21	44.35	lncRNA	665
Down	ENSG00000267529	ENSG00000267529	-	1	novel transcript, antisense C18orf1	chr18	13471012	13472709	-1	p11.21	51.71	lncRNA	1698
Down	ENSG00000267610	ENSG00000267610	-	1	novel transcript, antisense to NFIX	chr19	13069792	13071374	-1	p13.13	60.33	lncRNA	1583
Down	ENSG00000267690	LDLRAD4-AS1	-	1	LDLRAD4 antisense RNA 1 [Source:HGNC Symbol;Acc:HGNC:48592]	chr18	13419421	13427480	-1	p11.21	48.16	lncRNA	2190
Down	ENSG00000267694	ENSG00000267694	-	1	novel transcript, antisense C18orf1	chr18	13461020	13470823	-1	p11.21	43.95	lncRNA	498
Down	ENSG00000267731	ENSG00000267731	-	1	novel transcript	chr17	68189884	68192802	1	q24.2	32.82	lncRNA	2919
Down	ENSG00000267871	ZNF460-AS1	[310]	1	ZNF460 antisense RNA 1 [Source:HGNC Symbol;Acc:HGNC:53774]	chr19	57267211	57280334	-1	q13.43	45.12	lncRNA	1612
Down	ENSG00000268087	ENSG00000268087	-	1	novel transcript	chr19	16610411	16636531	1	p13.11	50.44	lncRNA	376
Down	ENSG00000268739	ENSG00000268739	-	1	novel transcript, antisense to KLK10	chr19	51014374	51014734	1	q13.41	54.02	lncRNA	240
Down	ENSG00000268996	MAN1B1-DT	-	1	MAN1B1 divergent transcript [Source:HGNC Symbol;Acc:HGNC:48715]	chr9	137084946	137086817	-1	q34.3	60.58	lncRNA	1872
Down	ENSG00000269038	SF1-DT	-	1	SF1 divergent transcript [Source:HGNC Symbol;Acc:HGNC:55278]	chr11	64778954	64779405	1	q13.1	48.67	lncRNA	452
Down	ENSG00000269293	ZSCAN16-AS1	-	1	ZSCAN16 antisense RNA 1 [Source:HGNC Symbol;Acc:HGNC:48982]	chr6	28015122	28137293	-1	p22.1	39.19	lncRNA	6466
Down	ENSG00000269950	ENSG00000269950	-	1	novel transcript	chr21	16574718	16582637	-1	q21.1	33.4	lncRNA	729
Down	ENSG00000270504	ENSG00000270504	-	1	novel transcript, antisense to PXDC1	chr6	3751111	3753871	1	p25.2	62.22	lncRNA	2761
Down	ENSG00000270964	MAP2K5-DT	-	1	MAP2K5 divergent transcript [Source:HGNC Symbol;Acc:HGNC:55261]	chr15	67541072	67542604	-1	q23	46.77	lncRNA	1533
Down	ENSG00000271857	ENSG00000271857	-	1	novel transcript, antisense to RUNX2	chr6	45421079	45422005	-1	p21.1	49.95	lncRNA	927
Down	ENSG00000272077	ENSG00000272077	-	1	novel transcript	chr3	44667412	44669364	1	p21.31	41.53	lncRNA	1953
Down	ENSG00000272078	ENSG00000272078	-	1	novel transcript, antisense to CASZ1	chr1	10639241	10654333	1	p36.22	61.49	lncRNA	7923
Down	ENSG00000272106	ENSG00000272106	-	1	artifact	chr1	1613758	1615795	-1	p36.33	57.36	lncRNA	2038
Down	ENSG00000272221	ENSG00000272221	-	1	novel transcript	chr6	31394289	31395495	-1	p21.33	44.49	lncRNA	1207
Down	ENSG00000272298	ENSG00000272298	-	1	novel transcript	chr15	92699040	92724277	-1	q26.1	45.48	lncRNA	240
Down	ENSG00000272341	ENSG00000272341	-	1	novel transcript	chr6	16764346	16766883	1	p22.3	34.08	lncRNA	2538
Down	ENSG00000272477	ENSG00000272477	-	1	novel transcript, sense intronic to SATB1	chr3	18408680	18409635	-1	p24.3	31.69	lncRNA	956
Down	ENSG00000272604	ENSG00000272604	-	1	novel transcript, antisense to EFCAB10	chr7	105571083	105573660	1	q22.3	35.76	lncRNA	2578
Down	ENSG00000272686	WASL-DT	-	1	WASL divergent transcript [Source:HGNC Symbol;Acc:HGNC:54820]	chr7	123749068	123751166	1	q31.32	41.64	lncRNA	2099
Down	ENSG00000272692	ENSG00000272692	-	1	novel transcript	chr10	75409142	75411842	1	q22.2	52.65	lncRNA	1905
Down	ENSG00000272912	ENSG00000272912	-	1	novel transcript	chr10	102914585	102915404	1	q24.32	37.8	lncRNA	820
Down	ENSG00000272927	ENSG00000272927	-	1	novel transcript, antisense to PDE6B	chr4	661209	661945	-1	p16.3	51.56	lncRNA	737
Down	ENSG00000273015	ENSG00000273015	-	1	novel transcript	chr12	45718046	45727775	-1	q12	38.04	lncRNA	9730
Down	ENSG00000273107	ENSG00000273107	-	1	novel transcript	chr10	24953241	24953513	1	p12.1	49.08	lncRNA	273
Down	ENSG00000273320	ENSG00000273320	-	1	novel transcript, antisense to NAMPT	chr7	106285480	106286326	1	q22.3	47.11	lncRNA	847
Down	ENSG00000273356	LINC02019	-	1	long intergenic non-protein coding RNA 2019 [Source:HGNC Symbol;Acc:HGNC:52854]	chr3	50669989	50672048	1	p21.2	41.12	lncRNA	2060
Down	ENSG00000273373	ENSG00000273373	-	1	novel transcript, antisense to SLC16A4	chr1	110370154	110373003	1	p13.3	34.98	lncRNA	2850
Down	ENSG00000273413	ENSG00000273413	-	1	novel transcript, antisense to ADIRF	chr10	86970237	86970826	-1	q23.2	63.22	lncRNA	465
Down	ENSG00000274370	ENSG00000274370	-	1	novel transcript	chr17	83098377	83098987	1	q25.3	63.18	lncRNA	611
Down	ENSG00000274515	ENSG00000274515	-	1	novel transcript, antisense to IMP3	chr15	75645020	75645442	1	q24.2	48.7	lncRNA	423
Down	ENSG00000274578	ENSG00000274578	-	1	novel transcript, sense intronic to CDH2	chr18	28146233	28146703	-1	q12.1	32.7	lncRNA	471
Down	ENSG00000274849	ENSG00000274849	-	1	novel transcript, sense intronic to MOCOS	chr18	36189824	36190272	1	q12.2	45.43	lncRNA	449
Down	ENSG00000274904	ENSG00000274904	-	1	novel transcript, antisense to ALDOA	chr16	30064306	30064825	-1	p11.2	61.54	lncRNA	520
Down	ENSG00000275764	ENSG00000275764	-	1	novel transcript	chr12	27037100	27038960	1	p11.23	32.72	lncRNA	1861
Down	ENSG00000276791	ENSG00000276791	-	1	novel transcript	chr16	2777319	2780568	1	p13.3	58.86	lncRNA	3250
Down	ENSG00000277763	ENSG00000277763	-	1	novel transcript	chr14	56117316	56117990	-1	q22.3	44.3	lncRNA	675
Down	ENSG00000278514	ENSG00000278514	-	1	novel transcript	chr15	91022766	91023200	1	q26.1	37.7	lncRNA	435
Down	ENSG00000278727	ENSG00000278727	-	1	novel transcript	chr13	76887551	76891135	1	q22.3	40.56	lncRNA	3585
Down	ENSG00000280109	PLAC4	-	1	placenta enriched 4 [Source:HGNC Symbol;Acc:HGNC:14616]	chr21	41175231	41186788	-1	q22.2	46.89	lncRNA	10570
Down	ENSG00000280623	PCAT14	-	1	prostate cancer associated transcript 14 [Source:HGNC Symbol;Acc:HGNC:48977]	chr22	23536881	23547797	1	q11.23	43.41	lncRNA	4911
Down	ENSG00000282728	PGR-AS1	-	1	PGR antisense RNA 1 [Source:HGNC Symbol;Acc:HGNC:52650]	chr11	101129077	101209591	1	q22.1	36.57	lncRNA	1794
Down	ENSG00000283757	ENSG00000283757	-	1	novel transcript	chr20	46455033	46496731	-1	q13.12	39.83	lncRNA	4273

## Sheet: Mucinous
Status	Gene_ID	Gene_name	Series	Previous references in EOC	Gene_description	Chromosome_scaffold_name	Gene_start_bp	Gene_end_bp	Strand	Karyotype_band	Gene_GC_content	Gene_type	Gene_Length
Up	ENSG00000224259	LINC01133	GSE26913	[242]	long intergenic non-protein coding RNA 1133 [Source:HGNC Symbol;Acc:HGNC:49447]	chr1	159958035	159984750	1	q23.2	45.81	lncRNA	3676
Up	ENSG00000189223	PAX8-AS1	GSE26913	[293]	PAX8 antisense RNA 1 [Source:HGNC Symbol;Acc:HGNC:49271]	chr2	113211421	113276581	1	q14.1	49.01	lncRNA	22105
Up	ENSG00000229719	MIR194-2HG	GSE121103	-	MIR194-2 host gene [Source:HGNC Symbol;Acc:HGNC:51946]	chr11	64889560	64893449	-1	q13.1	57.99	lncRNA	3647
Up	ENSG00000274993	ENSG00000274993	GSE121103	-	novel transcript	chr7	100963828	100968124	-1	q22.1	60.23	lncRNA	2555
Up	ENSG00000233529	HCG21	GSE121103	-	HLA complex group 21 [Source:HGNC Symbol;Acc:HGNC:31335]	chr6	30945979	30954862	-1	p21.33	46.5	lncRNA	605
Up	ENSG00000229167	ENSG00000229167	GSE121103	-	novel transcript	chr1	31571585	31577898	-1	p35.2	55.86	lncRNA	813
Up	ENSG00000231226	TRIM31-AS1	GSE121103	-	TRIM31 antisense RNA 1 [Source:HGNC Symbol;Acc:HGNC:39761]	chr6	30105240	30114724	1	p22.1	46.09	lncRNA	549
Up	ENSG00000253868	FER1L6-AS2	GSE121103	-	FER1L6 antisense RNA 2 [Source:HGNC Symbol;Acc:HGNC:26534]	chr8	124044395	124171522	-1	q24.13	41.61	lncRNA	4870
Up	ENSG00000224739	ENSG00000224739	GSE121103	-	novel transcript	chr2	43001355	43006060	-1	p21	47.11	lncRNA	237
Up	ENSG00000225555	ENSG00000225555	GSE121103	-	novel transcript	chr21	34353099	34375364	-1	q22.11	43.23	lncRNA	2643
Up	ENSG00000267112	ENSG00000267112	GSE121103	-	novel transcript, antisense to RAB27B	chr18	54885866	54898083	-1	q21.2	35.21	lncRNA	567
Up	ENSG00000232354	VIPR1-AS1	GSE121103	-	VIPR1 antisense RNA 1 [Source:HGNC Symbol;Acc:HGNC:40610]	chr3	42506465	42533258	-1	p22.1	52.96	lncRNA	5197
Up	ENSG00000238164	TNFRSF14-AS1	GSE121103	-	TNFRSF14 antisense RNA 1 [Source:HGNC Symbol;Acc:HGNC:26966]	chr1	2549920	2557031	-1	p36.32	62.87	lncRNA	6137
Up	ENSG00000259652	ENSG00000259652	GSE121103	-	novel transcript, antisense to TSPAN3	chr15	77043680	77045160	1	q24.3	49.29	lncRNA	264
Up	ENSG00000231298	MANCR	GSE121103	-	mitotically associated long non coding RNA [Source:HGNC Symbol;Acc:HGNC:44678]	chr10	4650158	4678185	-1	p15.1	36.35	lncRNA	2830
Up	ENSG00000227053	MUC12-AS1	GSE121103	-	MUC12 antisense RNA 1 [Source:HGNC Symbol;Acc:HGNC:40382]	chr7	101014320	101017608	-1	q22.1	55.52	lncRNA	407
Up	ENSG00000234362	LINC01914	GSE121103	-	long intergenic non-protein coding RNA 1914 [Source:HGNC Symbol;Acc:HGNC:52733]	chr2	41931599	41933909	-1	p21	46.73	lncRNA	1084
Up	ENSG00000230698	ENSG00000230698	GSE121103	-	novel transcript	chr3	49899302	49903757	1	p21.31	58.57	lncRNA	544
Up	ENSG00000260592	ENSG00000260592	GSE121103	-	novel transcript, antisense to TMC5	chr16	19476916	19487899	-1	p12.3	44.08	lncRNA	633
Up	ENSG00000244383	FAM3D-AS1	GSE121103	-	FAM3D antisense RNA 1 [Source:HGNC Symbol;Acc:HGNC:41276]	chr3	58607080	58644491	1	p14.2	51.02	lncRNA	1812
Up	ENSG00000261235	ENSG00000261235	GSE121103	-	novel transcript, antisense to HSD17B2	chr16	82044336	82139631	-1	q23.3	41.47	lncRNA	1030
Up	ENSG00000277840	ENSG00000277840	GSE121103	-	novel transcript, sense intronic to FBXW8	chr12	117002463	117003152	1	q24.22	38.84	lncRNA	690
Up	ENSG00000255910	ENSG00000255910	GSE121103	-	novel transcript	chr12	19775451	20012261	1	p12.3	37.64	lncRNA	2755
Up	ENSG00000259354	ENSG00000259354	GSE121103	-	novel transcript, antisense to SLC30A4	chr15	45448427	45513767	1	q21.1	42.38	lncRNA	3886
Up	ENSG00000256072	ENSG00000256072	GSE121103	-	novel transcript	chr12	66251745	66257434	-1	q14.3	37.5	lncRNA	523
Up	ENSG00000244137	ENSG00000244137	GSE121103	-	novel transcript, antisense to CAPN9	chr1	230710698	230795492	-1	q42.2	46.92	lncRNA	1345
Up	ENSG00000273132	ENSG00000273132	GSE121103	-	novel transcript, antisense to LRP11	chr6	149852462	149853192	1	q25.1	47.47	lncRNA	312
Up	ENSG00000254988	ENSG00000254988	GSE121103	-	novel transcript	chr11	76955417	76978619	-1	q13.5	41.1	lncRNA	568
Up	ENSG00000258451	EGILA	GSE121103	-	EGFR interacting lncRNA [Source:HGNC Symbol;Acc:HGNC:54482]	chr14	20693480	20707120	-1	q11.2	43.7	lncRNA	915
Up	ENSG00000261286	ATP2C2-AS1	GSE121103	-	ATP2C2 antisense RNA 1 [Source:HGNC Symbol;Acc:HGNC:53167]	chr16	84459259	84467361	-1	q24.1	51.76	lncRNA	2998
Up	ENSG00000257256	ENSG00000257256	GSE121103	-	novel transcript, antisense to LIMA1	chr12	50219604	50229984	1	q13.12	43.17	lncRNA	325
Up	ENSG00000272620	AFAP1-AS1	GSE121103	[261]	AFAP1 antisense RNA 1 [Source:HGNC Symbol;Acc:HGNC:28141]	chr4	7754077	7778928	1	p16.1	52.9	lncRNA	12180
Up	ENSG00000235852	ENSG00000235852	GSE121103	-	novel transcript	chr2	190880797	190882059	-1	q32.2	70.23	lncRNA	919
Up	ENSG00000233038	PTPRN2-AS1	GSE121103	-	PTPRN2 antisense RNA 1 [Source:HGNC Symbol;Acc:HGNC:40488]	chr7	157854529	157863011	1	q36.3	58.05	lncRNA	1581
Up	ENSG00000269102	ENSG00000269102	GSE121103	-	novel transcript, antisense to ZNF766 and ZNF480	chr19	52284780	52297920	-1	q13.41	44.86	lncRNA	447
Up	ENSG00000255468	ENSG00000255468	GSE121103	-	novel transcript, antisense to SLC29A2	chr11	66347950	66364804	1	q13.2	48.63	lncRNA	2552
Up	ENSG00000232934	ENSG00000232934	GSE121103	-	novel transcript, antisense to ACSL5	chr10	112395813	112425589	-1	q25.2	42.18	lncRNA	3256
Up	ENSG00000261123	ENSG00000261123	GSE121103	-	novel transcript, intronic to PKD1	chr16	2094830	2097026	-1	p13.3	54.39	lncRNA	596
Up	ENSG00000241886	ENSG00000241886	GSE121103	-	novel transcript, sense intronic to GK	chrX	30698207	30721932	1	p21.2	37.46	lncRNA	562
Up	ENSG00000272320	ENSG00000272320	GSE121103	-	novel transcript, antisense to SLC22A23	chr6	3311662	3313650	1	p25.2	46.15	lncRNA	1989
Up	ENSG00000215692	ENSG00000215692	GSE121103	-	novel transcript	chr2	241734715	241735498	-1	q37.3	73.21	lncRNA	472
Up	ENSG00000261664	TTC39A-AS1	GSE121103	-	TTC39A antisense RNA 1 [Source:HGNC Symbol;Acc:HGNC:40851]	chr1	51329654	51335324	1	p32.3	53.68	lncRNA	1222
Up	ENSG00000268475	ENSG00000268475	GSE121103	-	novel transcript, antisense to B3GNT8	chr19	41425359	41426237	1	q13.2	64.05	lncRNA	344
Up	ENSG00000265408	ENSG00000265408	GSE121103	-	novel transcript	chr16	66942712	66963256	1	q22.1	49.71	lncRNA	317
Up	ENSG00000258973	ENSG00000258973	GSE121103	-	novel transcript	chr14	24332310	24337382	-1	q12	58.21	lncRNA	930
Up	ENSG00000231628	ENSG00000231628	GSE121103	-	novel transcript	chr6	105279016	105281755	1	q21	40.47	lncRNA	1198
Up	ENSG00000175147	TMEM51-AS1	GSE121103	-	TMEM51 antisense RNA 1 [Source:HGNC Symbol;Acc:HGNC:26301]	chr1	15111815	15153618	-1	p36.21	49.51	lncRNA	11973
Up	ENSG00000261553	ENSG00000261553	GSE121103	-	novel transcript	chr13	75549773	75807120	1	q22.2	38.15	lncRNA	4178
Up	ENSG00000258727	ENSG00000258727	GSE121103	-	novel transcript, antisense to AP1G2	chr14	23561097	23568073	1	q11.2	55.98	lncRNA	3243
Down	ENSG00000237978	KCNMB2-AS1	GSE121103	-	KCNMB2 antisense RNA 1 [Source:HGNC Symbol;Acc:HGNC:51409]	chr3	178526505	178937352	-1	q26.32	38.08	lncRNA	4745
Down	ENSG00000228174	ENSG00000228174	GSE121103	-	novel transcript	chr9	97512706	97517836	-1	q22.33	49.74	lncRNA	1408
Down	ENSG00000276216	ENSG00000276216	GSE121103	-	novel transcript	chr1	145281116	145281462	1	q21.1	49.57	lncRNA	347
Down	ENSG00000236532	LINC01695	GSE121103	-	long intergenic non-protein coding RNA 1695 [Source:HGNC Symbol;Acc:HGNC:52483]	chr21	28116094	28228667	-1	q21.3	36.7	lncRNA	5319
Down	ENSG00000266970	SOCS3-DT	GSE121103	-	SOCS3 divergent transcript [Source:HGNC Symbol;Acc:HGNC:52799]	chr17	78360453	78373911	1	q25.3	53.5	lncRNA	1188
Down	ENSG00000258114	ENSG00000258114	GSE121103	-	novel transcript	chr10	117425194	117490419	1	q26.11	47.94	lncRNA	526
Down	ENSG00000256315	ENSG00000256315	GSE121103	-	novel transcript	chr11	115396756	115397658	1	q23.3	36.43	lncRNA	903
Down	ENSG00000239467	ENSG00000239467	GSE121103	[265]	glutamate rich 2 [Source:NCBI gene (formerly Entrezgene);Acc:285141]	chr2	170766878	170778729	1	q31.1	41.61	lncRNA	2905
Down	ENSG00000256540	ENSG00000256540	GSE121103	-	novel transcript	chr12	166856	182399	-1	p13.33	57.55	lncRNA	1184
Down	ENSG00000240219	ENSG00000240219	GSE121103	-	novel transcript	chr1	204626775	204629712	1	q32.1	52.59	lncRNA	2219
Down	ENSG00000233901	LINC01503	GSE121103	[37]	long intergenic non-protein coding RNA 1503 [Source:HGNC Symbol;Acc:HGNC:51184]	chr9	129332300	129359541	1	q34.11	55.36	lncRNA	4666
Down	ENSG00000260515	ENSG00000260515	GSE121103	-	novel transcript	chr5	10195121	10197628	-1	p15.2	42.7	lncRNA	2508
Down	ENSG00000271998	ENSG00000271998	GSE121103	-	novel transcript	chr5	10195187	10197622	-1	p15.2	42.61	lncRNA	2436
Down	ENSG00000230061	TRPM2-AS	GSE121103	[152]	TRPM2 antisense RNA [Source:HGNC Symbol;Acc:HGNC:50758]	chr21	44414588	44425272	-1	q22.3	57.84	lncRNA	2292
Down	ENSG00000231794	ENSG00000231794	GSE121103	-	novel transcript, antisense to WDR91	chr7	135198401	135209837	1	q33	43.76	lncRNA	2503
Down	ENSG00000280303	ERICD	GSE121103	-	E2F1-regulated inhibitor of cell death [Source:HGNC Symbol;Acc:HGNC:49404]	chr8	140636281	140638283	1	q24.3	52.92	lncRNA	2003
Down	ENSG00000243926	TIPARP-AS1	GSE121103	-	TIPARP antisense RNA 1 [Source:HGNC Symbol;Acc:HGNC:41028]	chr3	156671862	156674446	-1	q25.31	44.22	lncRNA	1322
Down	ENSG00000176753	C15orf56	GSE121103	-	chromosome 15 putative open reading frame 56 [Source:HGNC Symbol;Acc:HGNC:33868]	chr15	40250664	40252969	-1	q15.1	58.63	lncRNA	2306
Down	ENSG00000277534	ENSG00000277534	GSE121103	-	novel transcript, sense intronic to KCTD1	chr18	26542971	26545791	-1	q11.2	37.54	lncRNA	2821
Down	ENSG00000224843	LINC00240	GSE121103	[244]	long intergenic non-protein coding RNA 240 [Source:HGNC Symbol;Acc:HGNC:18772]	chr6	26956932	27059749	1	p22.2	36.82	lncRNA	8418
Down	ENSG00000263970	ENSG00000263970	GSE121103	-	novel transcript, antisense to PTPRM	chr18	8406761	8406953	-1	p11.23	30.57	lncRNA	193
Down	ENSG00000225218	ENSG00000225218	GSE121103	-	novel transcript	chr21	42831040	42836477	-1	q22.3	51.1	lncRNA	285
Down	ENSG00000162913	OBSCN-AS1	GSE121103	-	OBSCN antisense RNA 1 [Source:HGNC Symbol;Acc:HGNC:32047]	chr1	228203503	228213664	-1	q42.13	60.11	lncRNA	3862
Down	ENSG00000273796	ENSG00000273796	GSE121103	-	novel transcript	chr21	45403809	45404369	-1	q22.3	59.71	lncRNA	561
Down	ENSG00000275097	ENSG00000275097	GSE121103	-	novel transcript, overlapping 3'UTR of FAM60A	chr12	31280422	31280895	-1	p11.21	31.22	lncRNA	474
Down	ENSG00000260473	ENSG00000260473	GSE121103	-	novel transcript	chr12	51815043	51842106	1	q13.13	54.5	lncRNA	2154
Down	ENSG00000250899	ENSG00000250899	GSE121103	-	novel transcript	chr12	3041437	3044950	1	p13.33	54.7	lncRNA	3514
Down	ENSG00000225439	BOLA3-AS1	GSE121103	-	BOLA3 divergent transcript [Source:HGNC Symbol;Acc:HGNC:42922]	chr2	74148007	74151952	1	p13.1	45.49	lncRNA	3727
Down	ENSG00000253320	MAILR	GSE121103	-	macrophage interferon regulatory lncRNA [Source:HGNC Symbol;Acc:HGNC:51558]	chr8	102864271	103002424	1	q22.3	43.8	lncRNA	7435
Down	ENSG00000245910	SNHG6	GSE121103	[311]	small nucleolar RNA host gene 6 [Source:HGNC Symbol;Acc:HGNC:32965]	chr8	66921684	66926398	-1	q13.1	44.54	lncRNA	1247
Down	ENSG00000246263	UBR5-AS1	GSE121103	-	UBR5 antisense RNA 1 [Source:HGNC Symbol;Acc:HGNC:51661]	chr8	102239394	102253750	1	q22.3	39.83	lncRNA	3115
Down	ENSG00000176868	ENSG00000176868	GSE121103	-	novel transcript, antisense to PRRC2B	chr9	131497479	131500191	-1	q34.13	49.87	lncRNA	2713
Down	ENSG00000268565	ENSG00000268565	GSE121103	-	novel transcript, antisense to TNFAIP8L1	chr19	4654964	4655524	-1	p13.3	50.98	lncRNA	392
Down	ENSG00000236756	DNAJC9-AS1	GSE121103	-	DNAJC9 antisense RNA 1 [Source:HGNC Symbol;Acc:HGNC:31432]	chr10	73247360	73276984	1	q22.2	41.21	lncRNA	3260

## Sheet: Endometrioid
Status	Gene_ID	Gene_name	Previous references in EOC	Series	Gene_description	Chromosome_scaffold_name	Gene_start_bp	Gene_end_bp	Strand	Karyotype_band	Gene_GC_content	Gene_type	Gene_Length
Up	ENSG00000272168	CASC15	-	GSE189553	cancer susceptibility 15 [Source:HGNC Symbol;Acc:HGNC:28245]	chr6	21664185	22654455	1	p22.3	39.41	lncRNA	34302
Down	ENSG00000223829	ENSG00000223829	-	GSE189553	novel transcript	chr7	46969644	47027481	1	p12.3	37.26	lncRNA	1595
Down	ENSG00000233901	LINC01503	-	GSE189553	long intergenic non-protein coding RNA 1503 [Source:HGNC Symbol;Acc:HGNC:51184]	chr9	129332300	129359541	1	q34.11	55.36	lncRNA	4666
Down	ENSG00000249007	ENSG00000249007	-	GSE189553	novel transcript	chr1	202011370	202015657	1	q32.1	57.42	lncRNA	987
Down	ENSG00000254815	LMNTD2-AS1	-	GSE189553	LMNTD2 antisense RNA 1 [Source:HGNC Symbol;Acc:HGNC:41204]	chr11	557595	560107	1	p15.5	63.07	lncRNA	2418
Down	ENSG00000233621	LINC01137	-	GSE189553	long intergenic non-protein coding RNA 1137 [Source:HGNC Symbol;Acc:HGNC:49453]	chr1	37350934	37474411	-1	p34.3	47.83	lncRNA	3019
Down	ENSG00000274605	PCCA-DT	-	GSE189553	PCCA divergent transcript [Source:HGNC Symbol;Acc:HGNC:53266]	chr13	100053074	100088950	-1	q32.3	44.38	lncRNA	2077
Down	ENSG00000267519	MIR23AHG	-	GSE189553	miR-23a/27a/24-2 cluster host gene [Source:HGNC Symbol;Acc:HGNC:27620]	chr19	13823880	13842928	-1	p13.12	57.53	lncRNA	19049
Down	ENSG00000197989	SNHG12	-	GSE189553	small nucleolar RNA host gene 12 [Source:HGNC Symbol;Acc:HGNC:30062]	chr1	28578538	28583132	-1	p35.3	50.99	lncRNA	4266
Down	ENSG00000268895	A1BG-AS1	-	GSE189553	A1BG antisense RNA 1 [Source:HGNC Symbol;Acc:HGNC:37133]	chr19	58347718	58355455	1	q13.43	55.93	lncRNA	3374
Down	ENSG00000204054	LINC00963	-	GSE189553	long intergenic non-protein coding RNA 963 [Source:HGNC Symbol;Acc:HGNC:48716]	chr9	129476946	129513687	1	q34.11	54.99	lncRNA	14066
